# Supplementary material
Source: PubMed Central journal article supplement (PMC4390264)

| Raw file                                      | Scan  | Method    | Score | m/z    | Gene names |
|-----------------------------------------------|-------|-----------|-------|--------|------------|
| 20120630_EXQ2_AtDe_SA_WTR_OG_pooled_final_1_1 | 10027 | FTMS; HCD | 78.11 | 542.77 | Rgs13      |

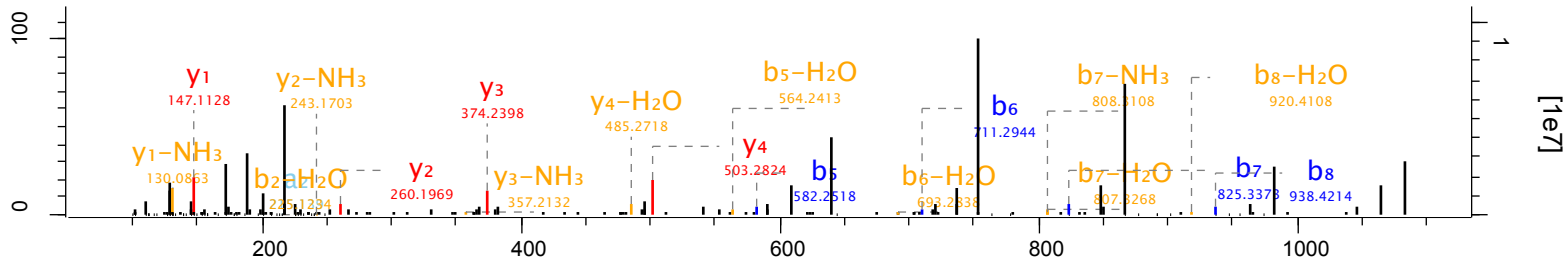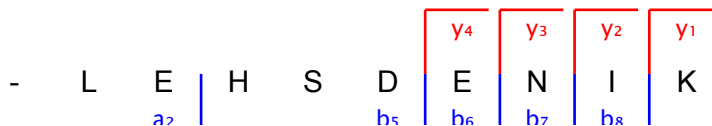

| Raw file                                      | Scan  | Method    | Score  | m/z    | Gene names |
|-----------------------------------------------|-------|-----------|--------|--------|------------|
| 20120630_EXQ2_AtDe_SA_WTR_OG_pooled_final_1_1 | 14269 | FTMS; HCD | 194.86 | 723.36 | Tmem100    |

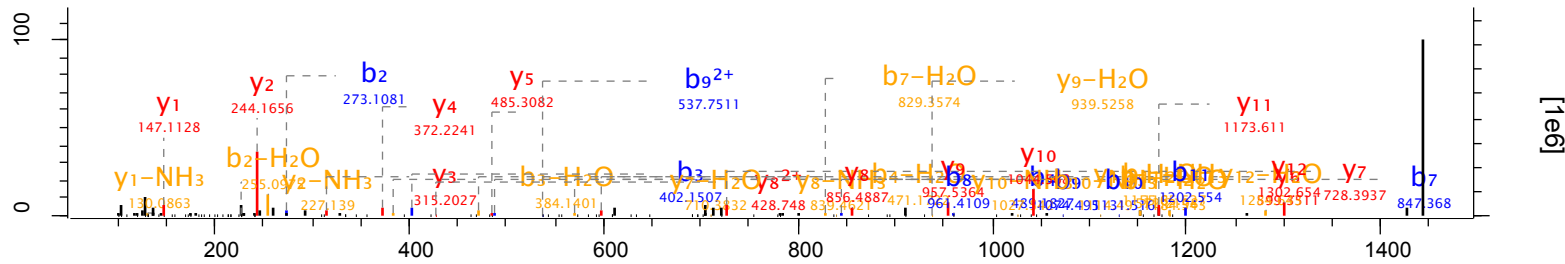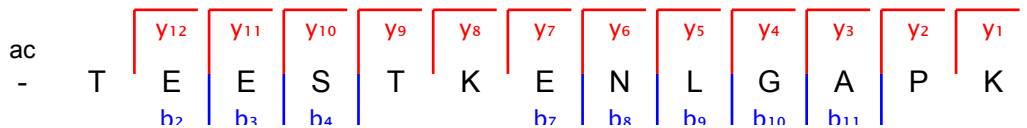

| Raw file                                      | Scan  | Method    | Score | m/z    | Gene names  |
|-----------------------------------------------|-------|-----------|-------|--------|-------------|
| 20120630_EXQ2_AtDe_SA_WTR_OG_pooled_final_1_1 | 26823 | FTMS; HCD | 86.78 | 836.36 | mt-Nd3;Mtno |

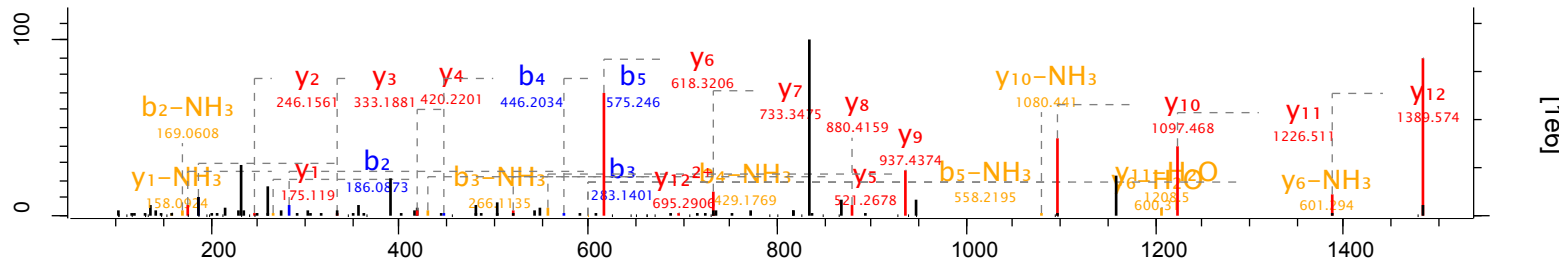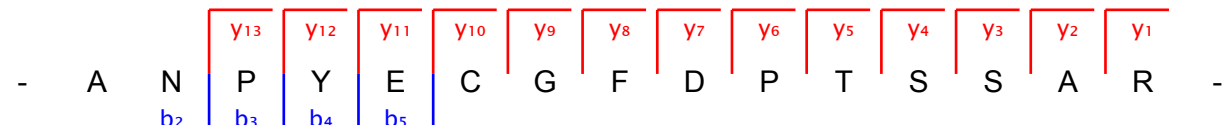

Raw file

Scan

Method

Score

m/z

20120630\_EXQ2\_AtDe\_SA\_WTR\_OG\_pooled\_final\_1\_1

34248

FTMS; HCD

37.18

803.9

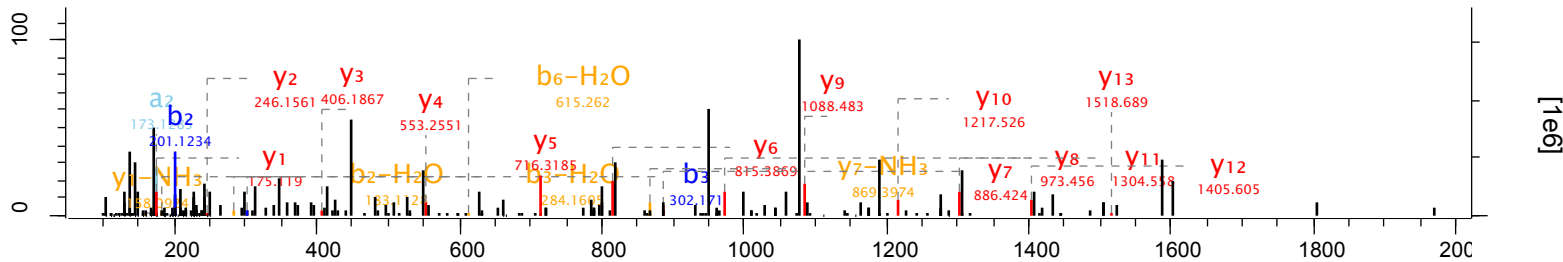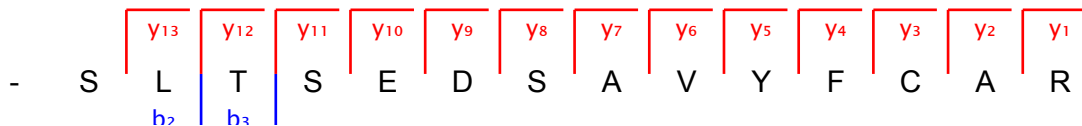

Raw file

Scan

Method

Score

m/z

20120630\_EXQ2\_AtDe\_SA\_WTR\_OG\_pooled\_final\_1\_1

35980

FTMS; HCD

78.4

715.4

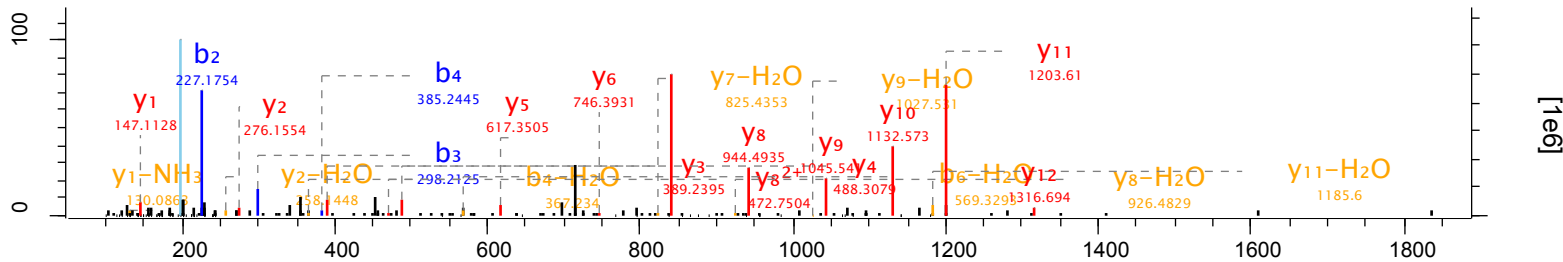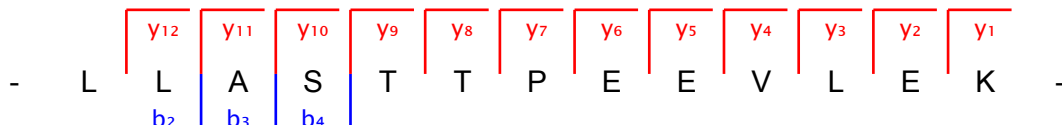

| Raw file                                      | Scan  | Method    | Score  | m/z   | Gene names |
|-----------------------------------------------|-------|-----------|--------|-------|------------|
| 20120630_EXQ2_AtDe_SA_WTR_OG_pooled_final_1_1 | 52851 | FTMS; HCD | 123.19 | 808.7 | S100a3     |

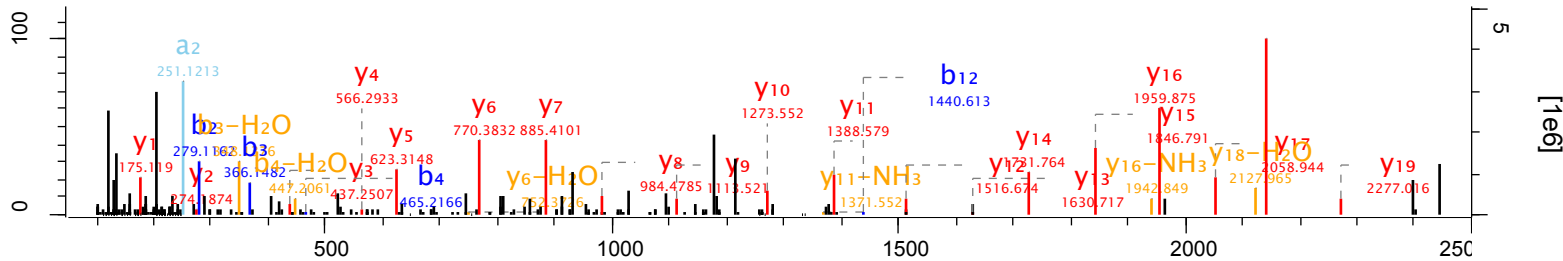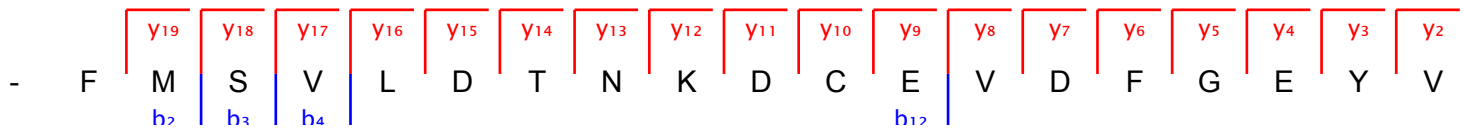

| Raw file                                      | Scan  | Method    | Score  | m/z    | Gene names |
|-----------------------------------------------|-------|-----------|--------|--------|------------|
| 20120630_EXQ2_AtDe_SA_WTR_OG_pooled_final_1_1 | 65889 | FTMS; HCD | 246.27 | 949.49 | Tppp       |

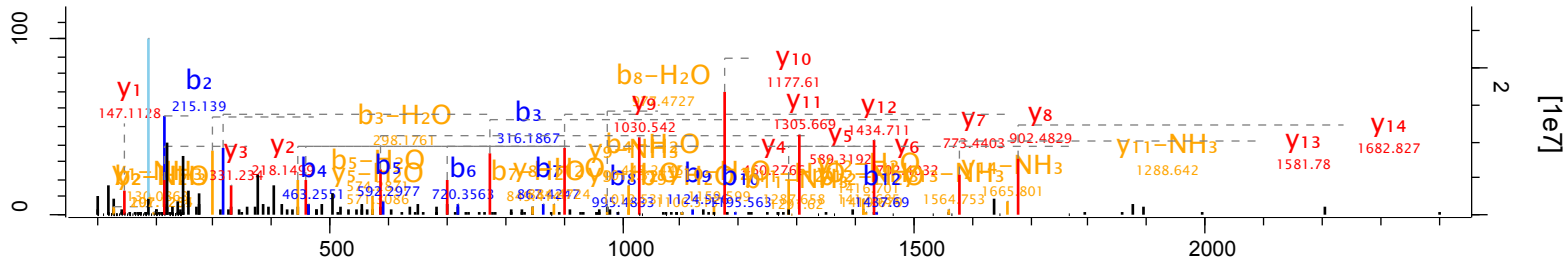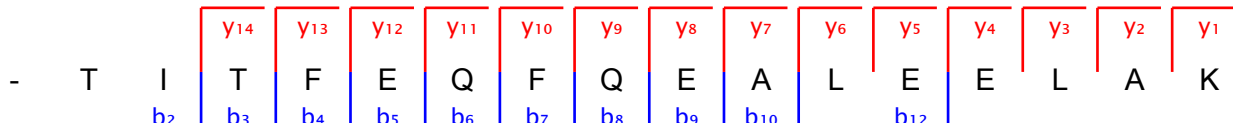

| Raw file                                      | Scan | Method    | Score  | m/z    | Gene names |
|-----------------------------------------------|------|-----------|--------|--------|------------|
| 20120630_EXQ2_AtDe_SA_WTR_OG_pooled_final_1_1 | 8771 | FTMS; HCD | 159.02 | 727.84 | Pcp411     |

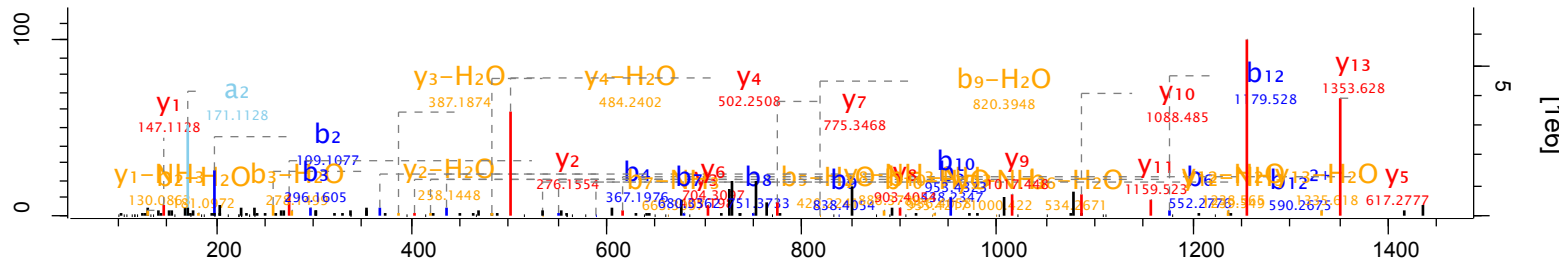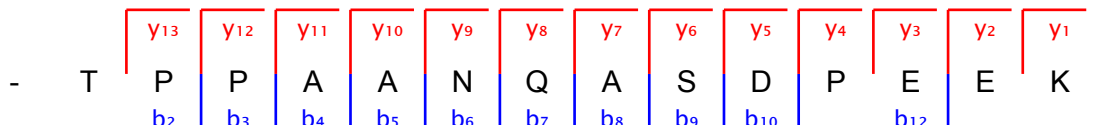



| Raw file                                       | Scan  | Method    | Score | m/z    | Gene names |
|------------------------------------------------|-------|-----------|-------|--------|------------|
| 20120630_EXQ2_AtDe_SA_WTR_OG_pooled_final_1_10 | 24084 | FTMS; HCD | 98.94 | 714.83 | Vsig8      |

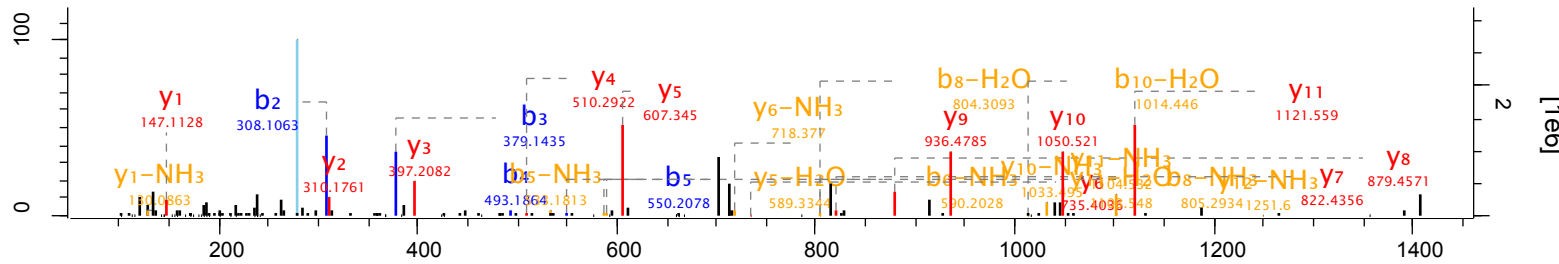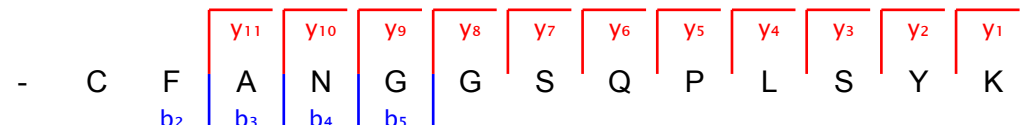

| Raw file                                       | Scan  | Method    | Score | m/z   | Gene names |
|------------------------------------------------|-------|-----------|-------|-------|------------|
| 20120630_EXQ2_AtDe_SA_WTR_OG_pooled_final_1_10 | 25100 | FTMS; HCD | 64.82 | 520.3 | Eya2       |

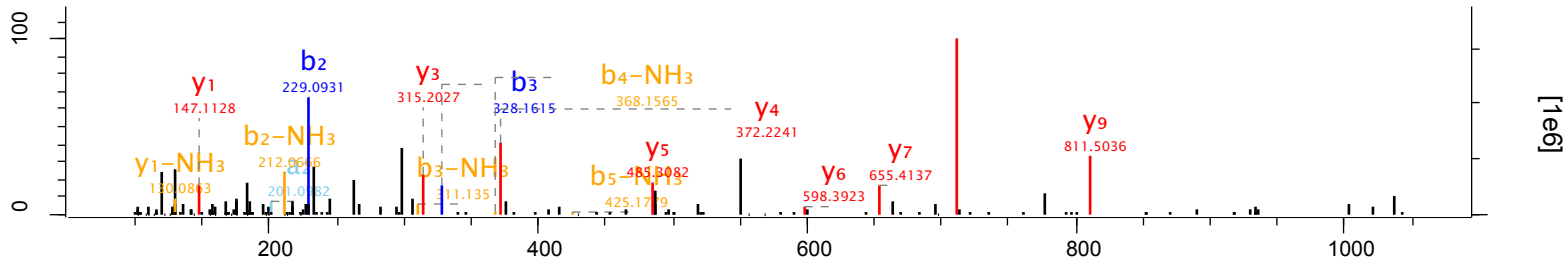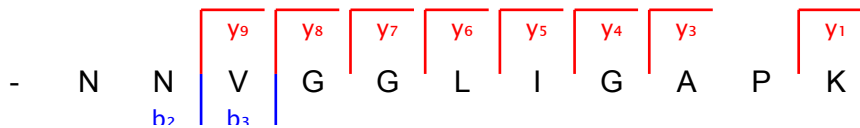

| Raw file                                       | Scan  | Method    | Score | m/z    | Gene names |
|------------------------------------------------|-------|-----------|-------|--------|------------|
| 20120630_EXQ2_AtDe_SA_WTR_OG_pooled_final_1_10 | 38715 | FTMS; HCD | 66.39 | 800.38 | Krtap19-5  |

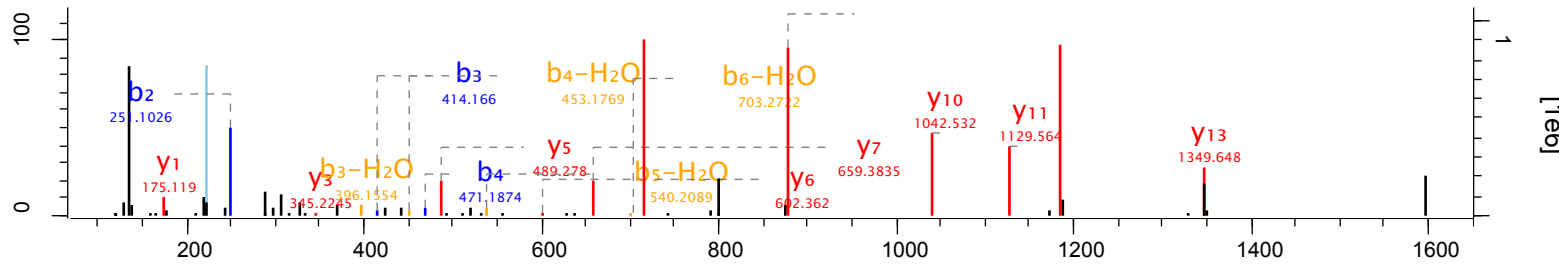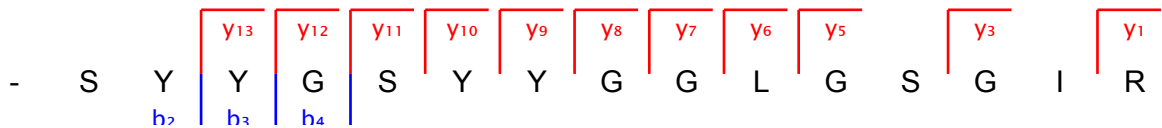

Raw file

20120630\_EXQ2\_AtDe\_SA\_WTR\_OG\_pooled\_final\_1\_10

Scan

8743

Method

FTMS; HCD

Score

72.7

m/z

399.45

Gene names

mt-Co3;Mtco

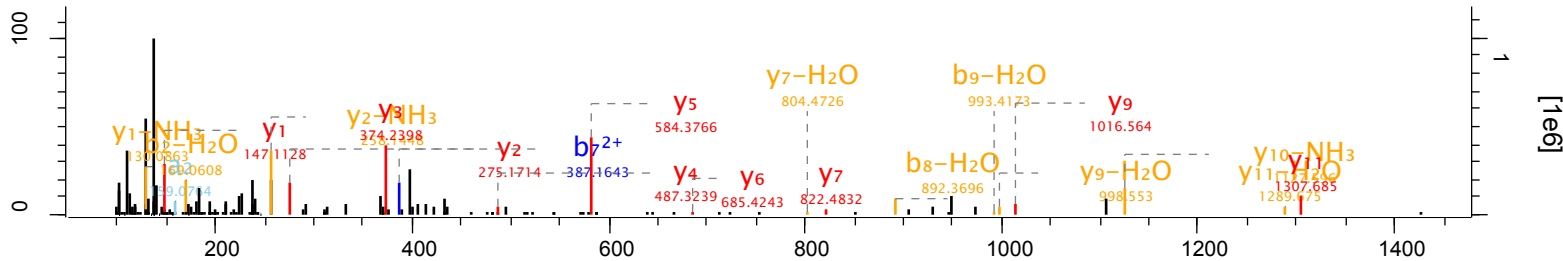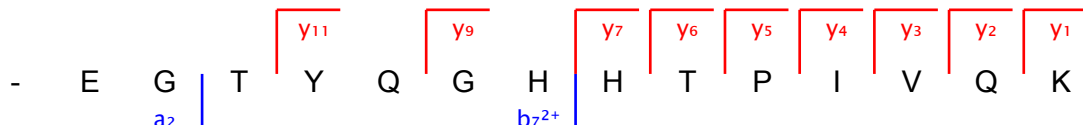

Raw file

20120630\_EXQ2\_AtDe\_SA\_WTR\_OG\_pooled\_final\_1\_11

Scan

10309

Method

FTMS; HCD

Score

110.08

m/z

536.79

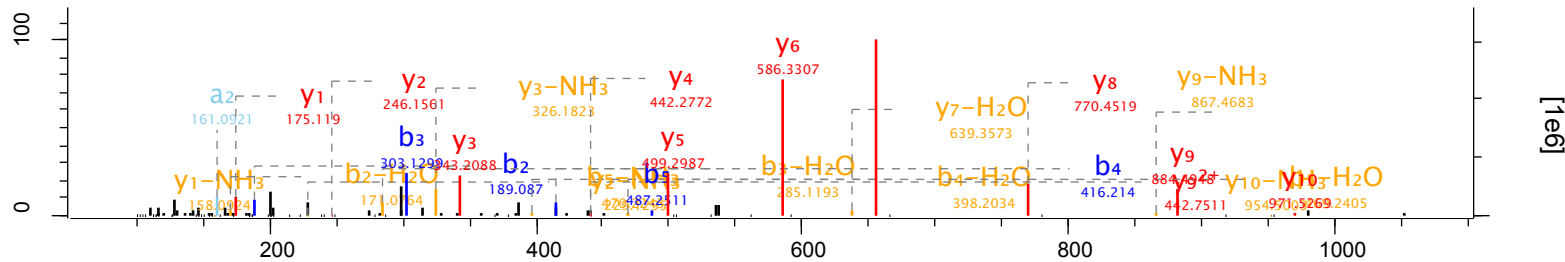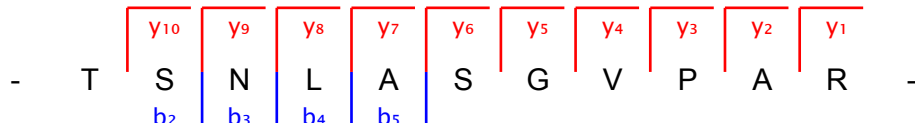

Raw file

20120630\_EXQ2\_AtDe\_SA\_WTR\_OG\_pooled\_final\_1\_11

Scan

11518

Method

FTMS; HCD

Score

104.01

m/z

535.28

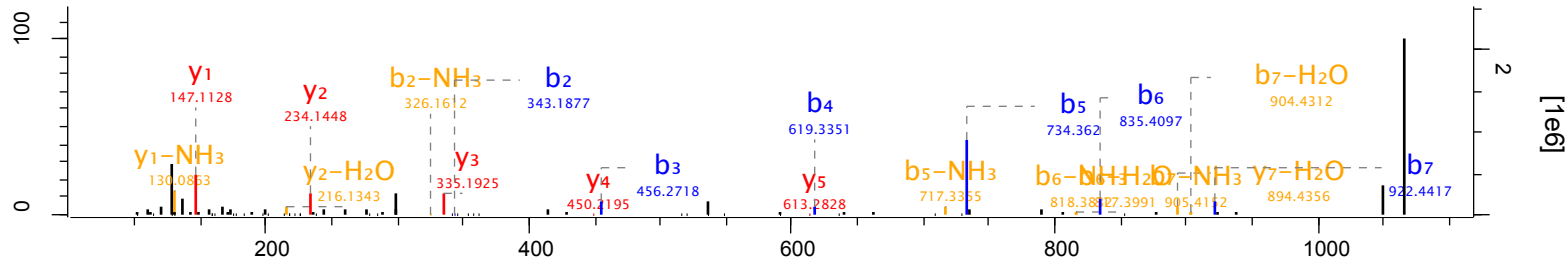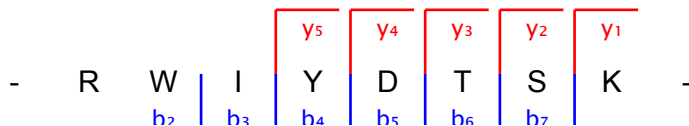

| Raw file                                       | Scan  | Method    | Score | m/z    | Gene names |
|------------------------------------------------|-------|-----------|-------|--------|------------|
| 20120630_EXQ2_AtDe_SA_WTR_OG_pooled_final_1_11 | 15766 | FTMS; HCD | 85.53 | 391.22 | Ndufa4l2   |

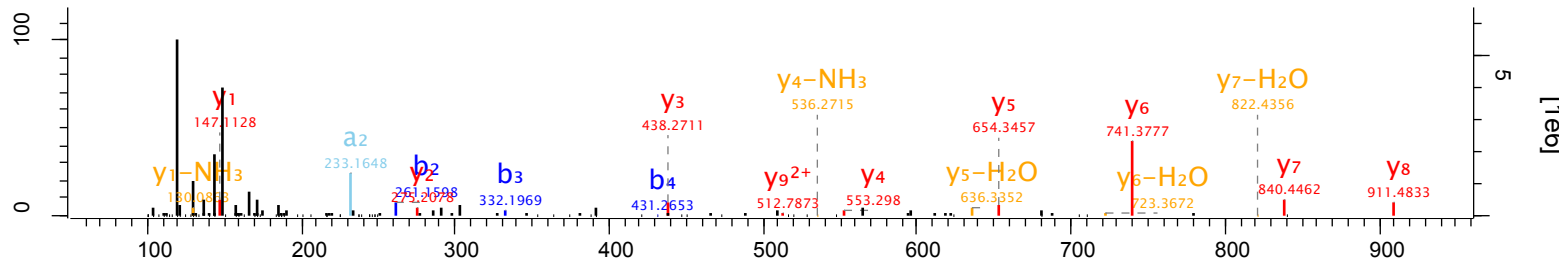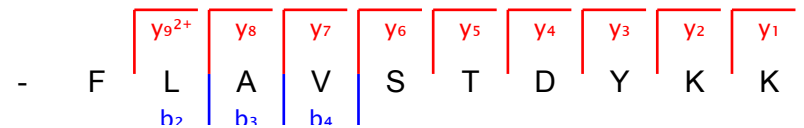

| Raw file                                       | Scan  | Method    | Score | m/z    | Gene names |
|------------------------------------------------|-------|-----------|-------|--------|------------|
| 20120630_EXQ2_AtDe_SA_WTR_OG_pooled_final_1_11 | 15783 | FTMS; HCD | 92.54 | 586.32 | Ndufa4l2   |

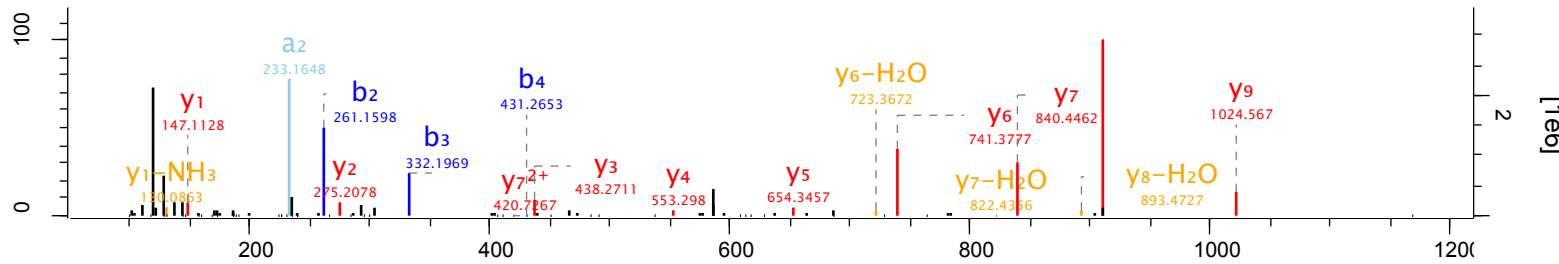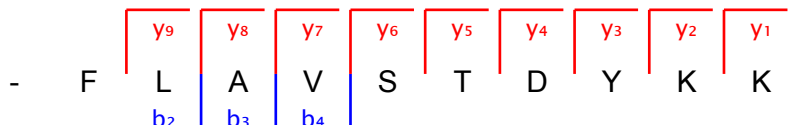



| Raw file                                       | Scan  | Method    | Score | m/z    | Gene names |
|------------------------------------------------|-------|-----------|-------|--------|------------|
| 20120630_EXQ2_AtDe_SA_WTR_OG_pooled_final_1_11 | 19845 | FTMS; HCD | 52.58 | 762.39 | Nfatc2     |

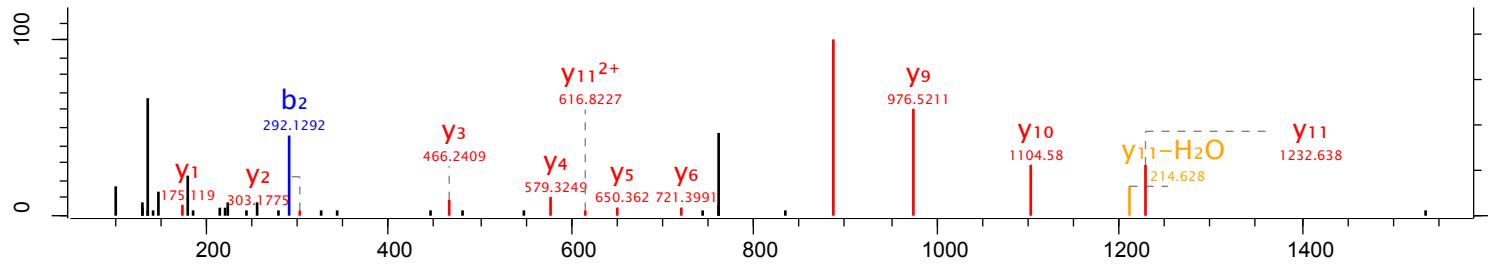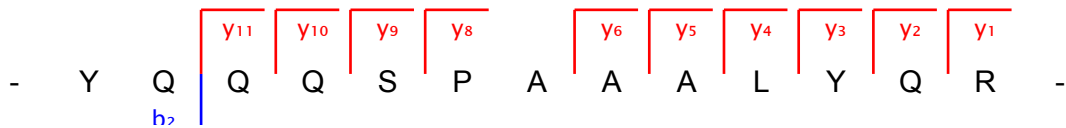

[1e5]

| Raw file                                       | Scan  | Method    | Score | m/z    | Gene names |
|------------------------------------------------|-------|-----------|-------|--------|------------|
| 20120630_EXQ2_AtDe_SA_WTR_OG_pooled_final_1_11 | 21312 | FTMS; HCD | 69.79 | 587.84 | Syngn2     |

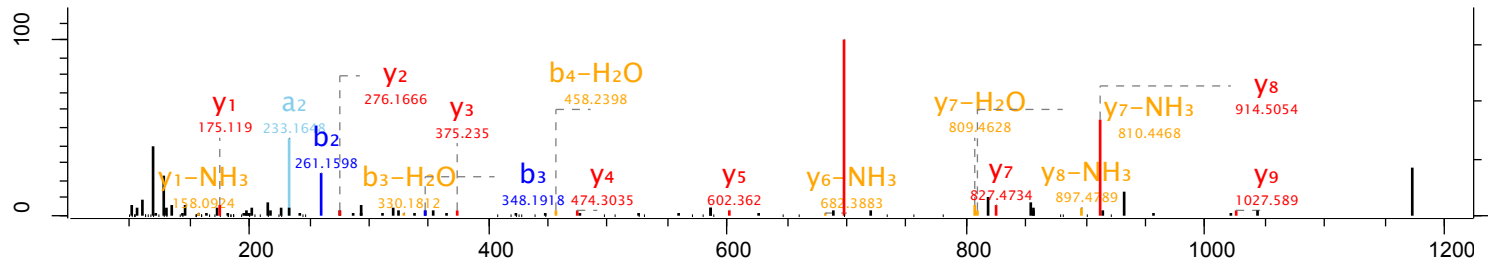

[1e6]

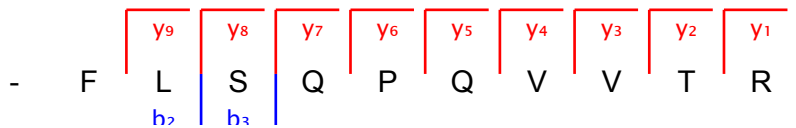

| Raw file                                       | Scan  | Method    | Score | m/z    | Gene names |
|------------------------------------------------|-------|-----------|-------|--------|------------|
| 20120630_EXQ2_AtDe_SA_WTR_OG_pooled_final_1_11 | 32275 | FTMS; HCD | 79.87 | 739.41 | Gdf7       |

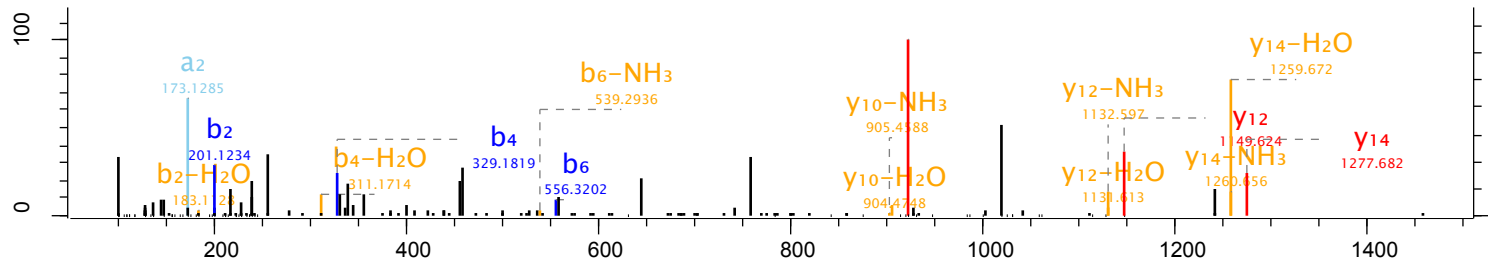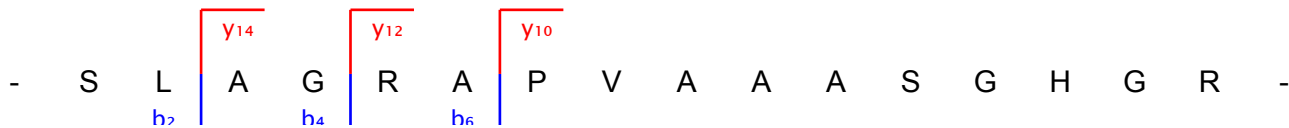

[1e7]

| Raw file                                       | Scan  | Method    | Score | m/z    | Gene names |
|------------------------------------------------|-------|-----------|-------|--------|------------|
| 20120630_EXQ2_AtDe_SA_WTR_OG_pooled_final_1_11 | 52138 | FTMS; HCD | 30.57 | 840.95 | Mea1       |

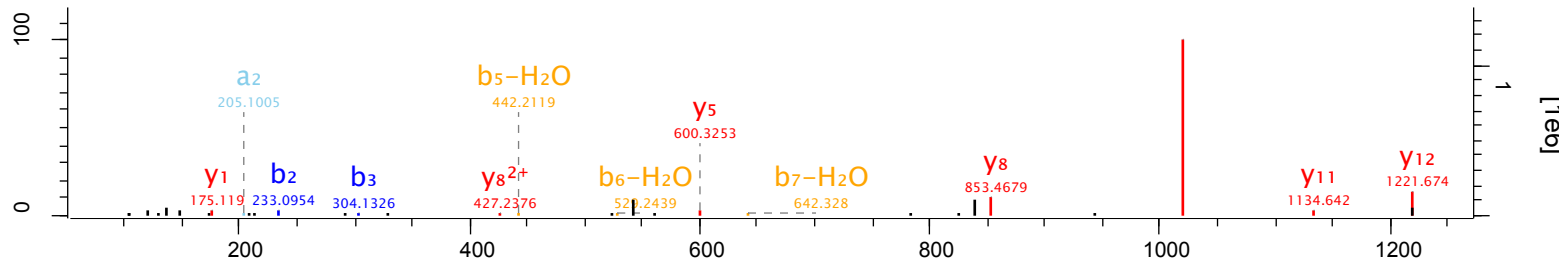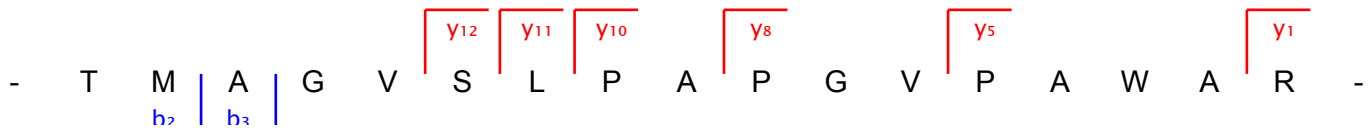

| Raw file                                       | Scan | Method    | Score  | m/z    | Gene names |
|------------------------------------------------|------|-----------|--------|--------|------------|
| 20120630_EXQ2_AtDe_SA_WTR_OG_pooled_final_1_11 | 8902 | FTMS; HCD | 104.41 | 773.78 | Krtap21-1  |

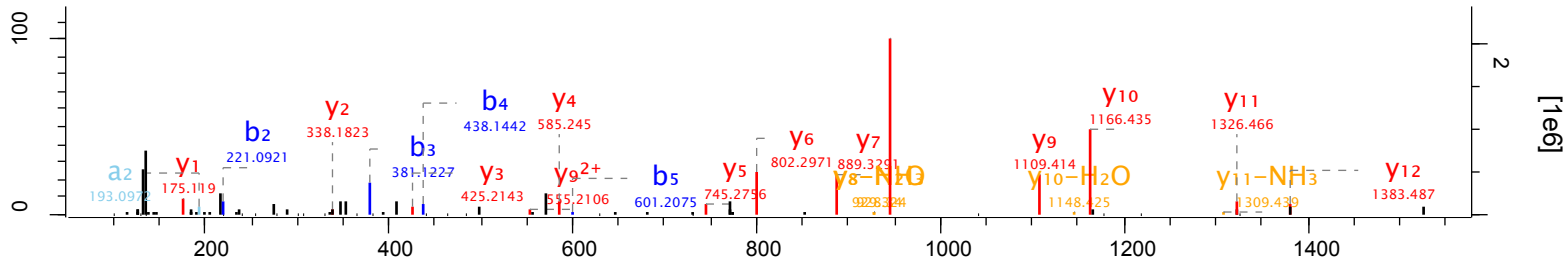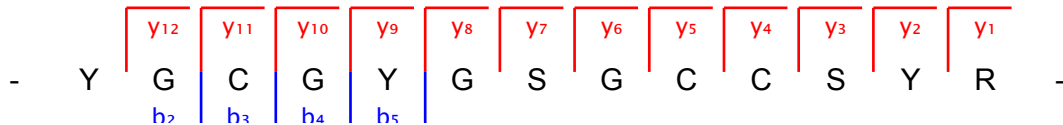

Raw file

Scan

Method

Score

m/z

20120630\_EXQ2\_AtDe\_SA\_WTR\_OG\_pooled\_final\_1\_12

19739

FTMS; HCD

126.51

651.82

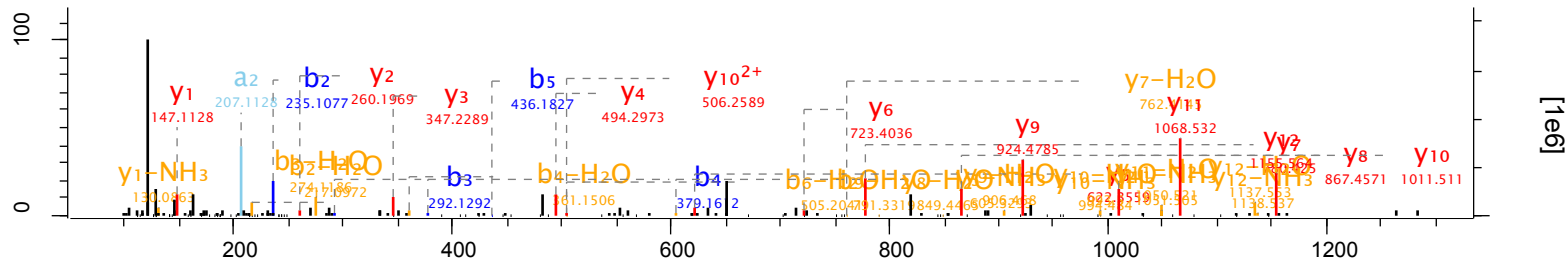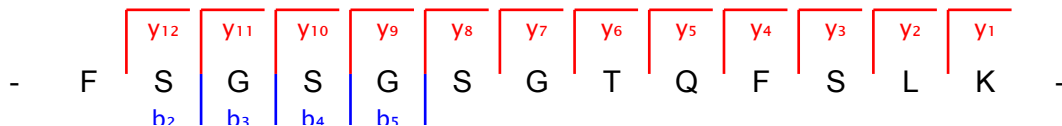

Raw file

20120630\_EXQ2\_AtDe\_SA\_WTR\_OG\_pooled\_final\_1\_12

Scan

2211

Method

FTMS; HCD

Score

76.85

m/z

375.2

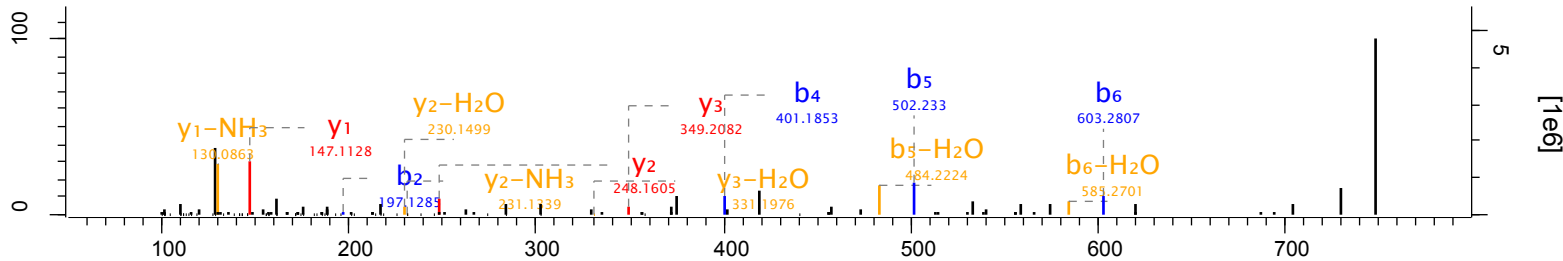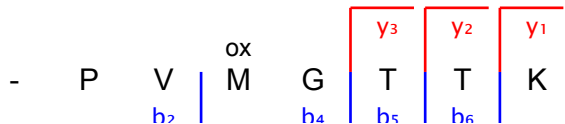

| Raw file                                       | Scan  | Method    | Score  | m/z    | Gene name |
|------------------------------------------------|-------|-----------|--------|--------|-----------|
| 20120630_EXQ2_AtDe_SA_WTR_OG_pooled_final_1_12 | 32085 | FTMS; HCD | 100.68 | 874.44 | Bri3      |

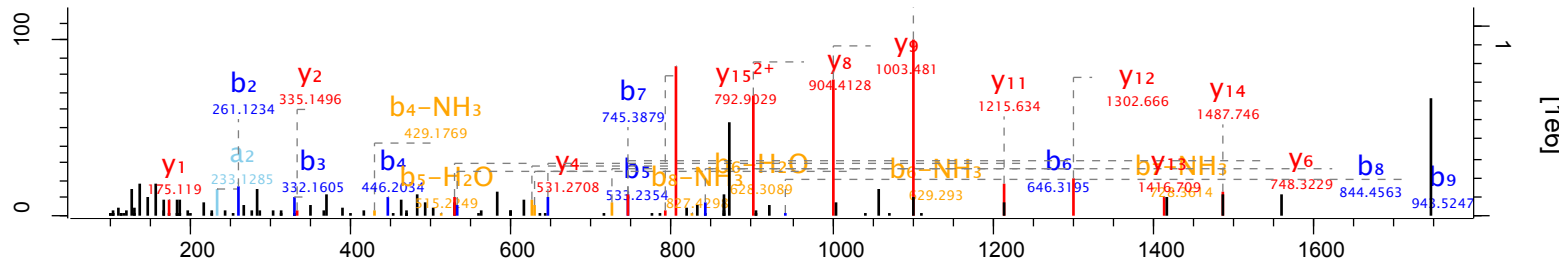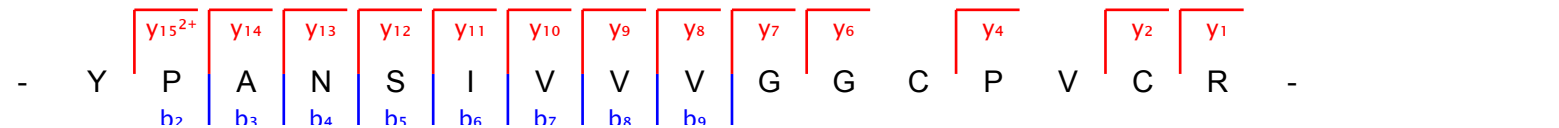



| Raw file                                       | Scan  | Method    | Score | m/z   | Gene names |
|------------------------------------------------|-------|-----------|-------|-------|------------|
| 20120630_EXQ2_AtDe_SA_WTR_OG_pooled_final_1_12 | 35231 | FTMS; HCD | 69.92 | 739.4 | Gdf7       |

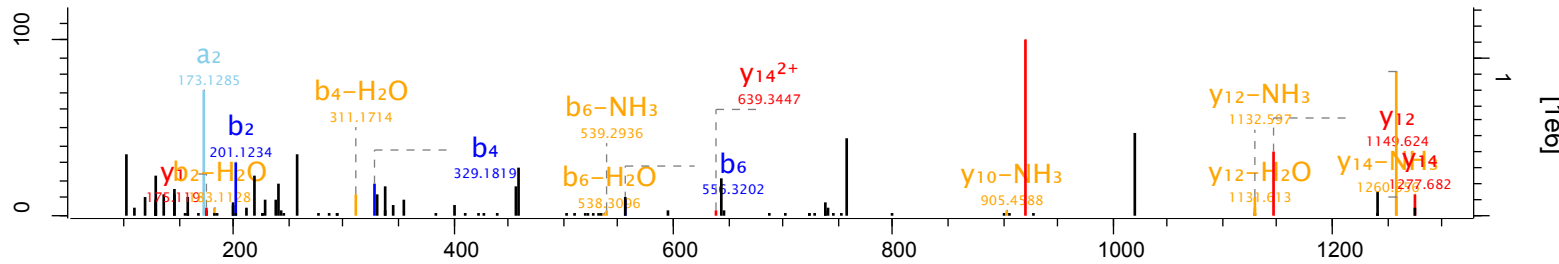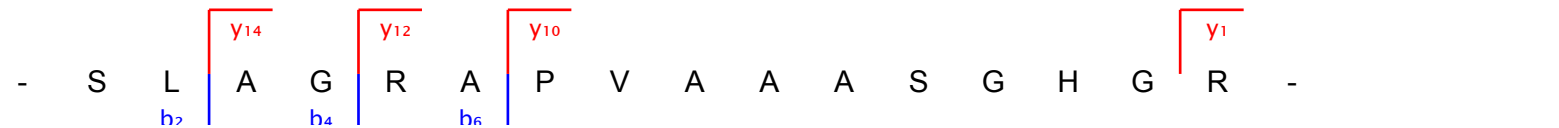

| Raw file                                       | Scan  | Method    | Score | m/z    | Gene names |
|------------------------------------------------|-------|-----------|-------|--------|------------|
| 20120630_EXQ2_AtDe_SA_WTR_OG_pooled_final_1_12 | 37364 | FTMS; HCD | 49.77 | 961.52 | Rgcc       |

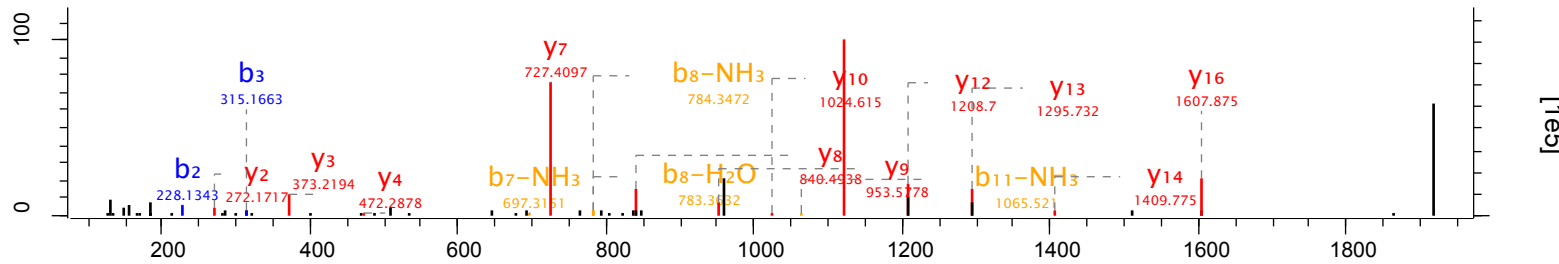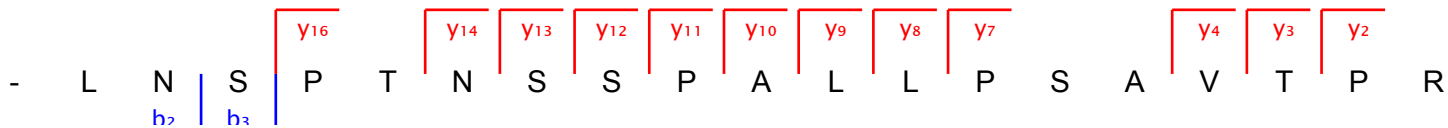

| Raw file                                       | Scan  | Method    | Score | m/z    | Gene names |
|------------------------------------------------|-------|-----------|-------|--------|------------|
| 20120630_EXQ2_AtDe_SA_WTR_OG_pooled_final_1_12 | 37986 | FTMS; HCD | 94.2  | 880.99 | Krtcap2    |

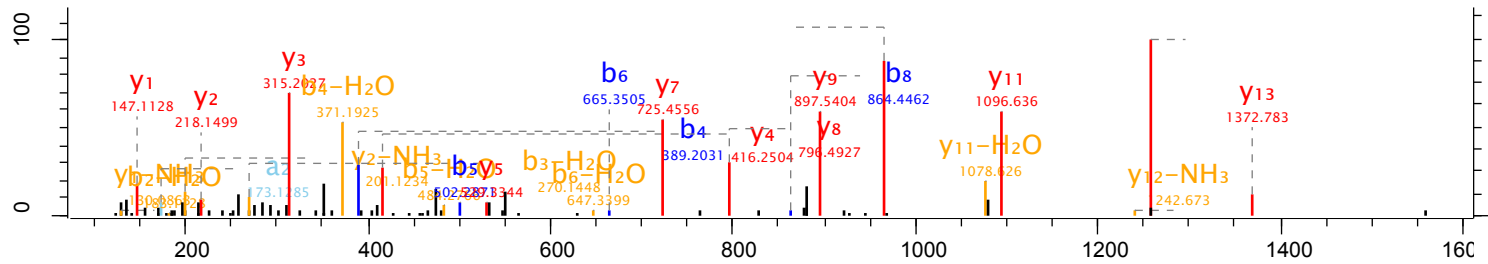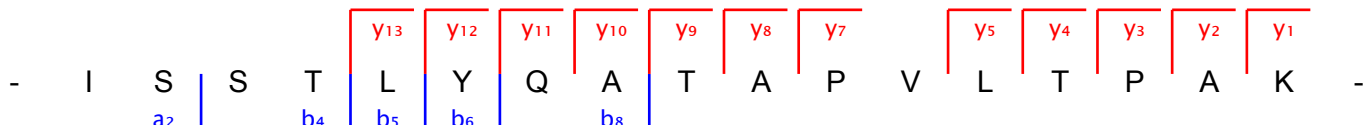

| Raw file                                       | Scan  | Method    | Score | m/z | Gene names |
|------------------------------------------------|-------|-----------|-------|-----|------------|
| 20120630_EXQ2_AtDe_SA_WTR_OG_pooled_final_1_12 | 38063 | FTMS; HCD | 37.69 | 588 | Krtcap2    |

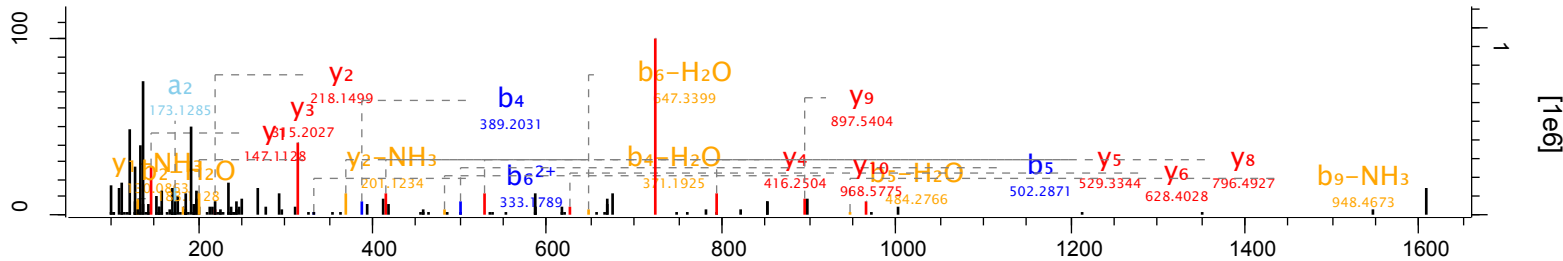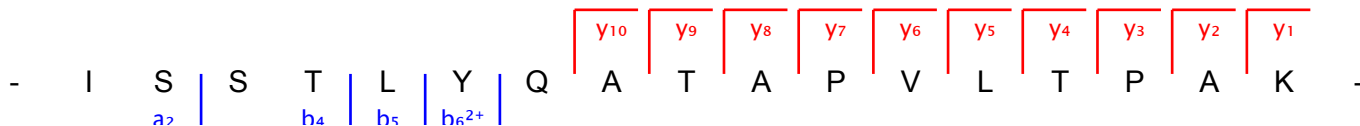

| Raw file                                       | Scan  | Method    | Score | m/z    | Gene names |
|------------------------------------------------|-------|-----------|-------|--------|------------|
| 20120630_EXQ2_AtDe_SA_WTR_OG_pooled_final_1_12 | 38160 | FTMS; HCD | 61.82 | 882.14 | Krtcap2    |

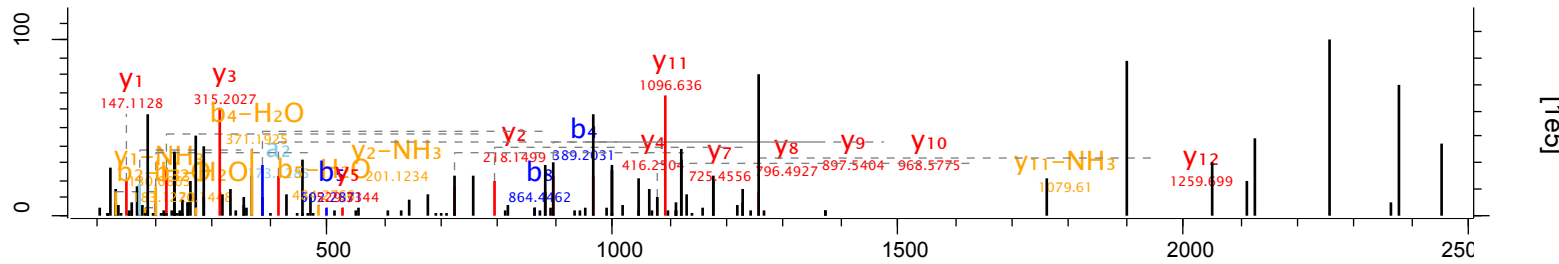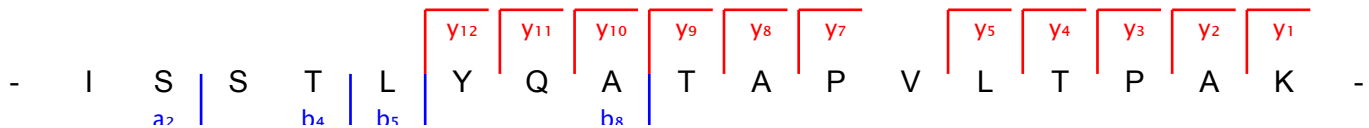

| Raw file                                       | Scan  | Method    | Score | m/z    | Gene names |
|------------------------------------------------|-------|-----------|-------|--------|------------|
| 20120630_EXQ2_AtDe_SA_WTR_OG_pooled_final_1_12 | 41496 | FTMS; HCD | 89.8  | 602.34 | Kctd12b    |

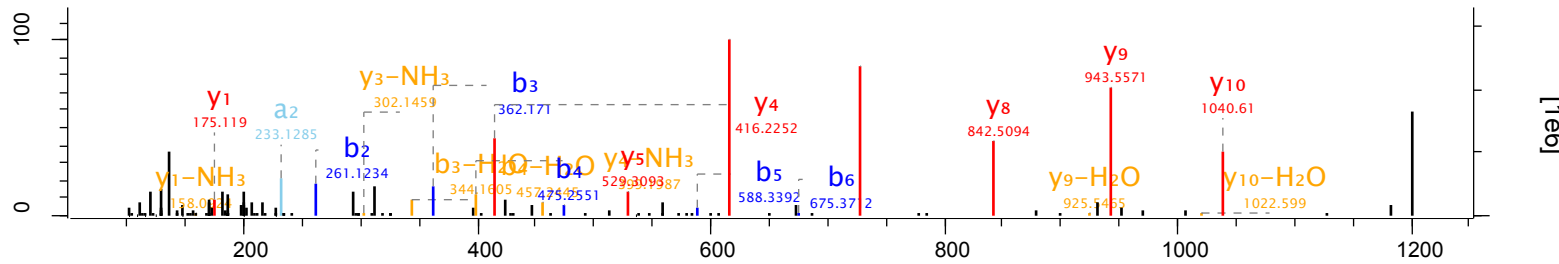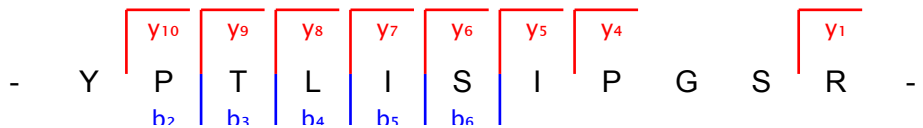

| Raw file                                       | Scan  | Method    | Score | m/z    | Gene names |
|------------------------------------------------|-------|-----------|-------|--------|------------|
| 20120630_EXQ2_AtDe_SA_WTR_OG_pooled_final_1_12 | 46214 | FTMS; HCD | 50.2  | 758.41 | PIIp       |

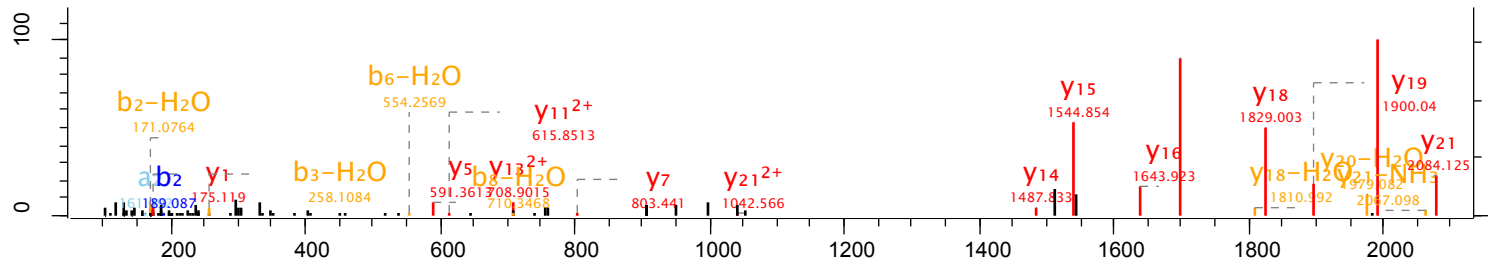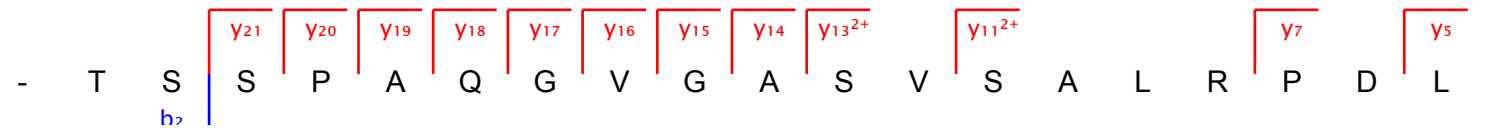

| Raw file                                       | Scan  | Method    | Score | m/z    | Gene names |
|------------------------------------------------|-------|-----------|-------|--------|------------|
| 20120630_EXQ2_AtDe_SA_WTR_OG_pooled_final_1_12 | 49867 | FTMS; HCD | 62.36 | 791.45 | Eln        |

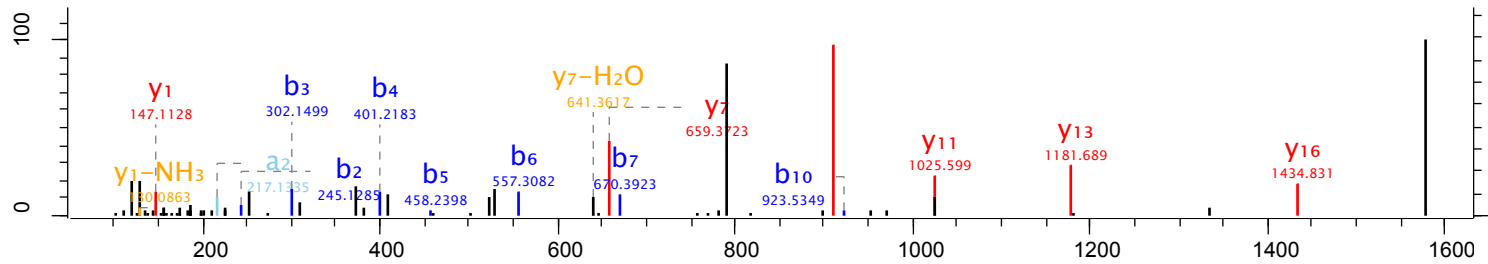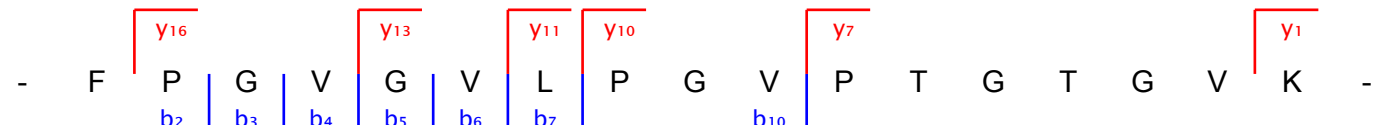

[1e5]



| Raw file                                      | Scan  | Method    | Score | m/z    | Gene names |
|-----------------------------------------------|-------|-----------|-------|--------|------------|
| 20120630_EXQ2_AtDe_SA_WTR_OG_pooled_final_1_2 | 10771 | FTMS; HCD | 86.67 | 542.77 | Rgs13      |

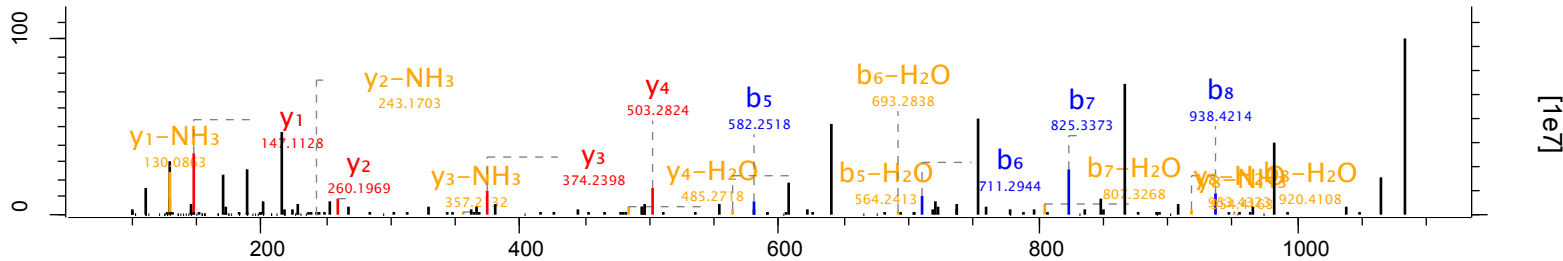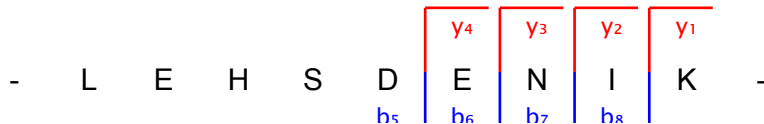

| Raw file                                      | Scan  | Method    | Score | m/z    | Gene names |
|-----------------------------------------------|-------|-----------|-------|--------|------------|
| 20120630_EXQ2_AtDe_SA_WTR_OG_pooled_final_1_2 | 15991 | FTMS; HCD | 54.87 | 710.64 | C1qb       |

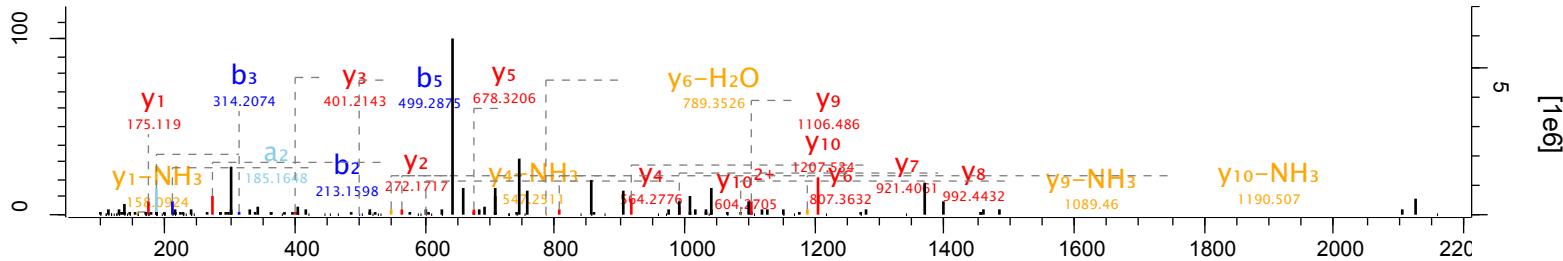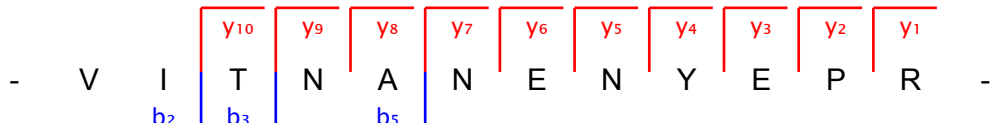

| Raw file                                      | Scan  | Method    | Score | m/z    | Gene names |
|-----------------------------------------------|-------|-----------|-------|--------|------------|
| 20120630_EXQ2_AtDe_SA_WTR_OG_pooled_final_1_2 | 45533 | FTMS; HCD | 129.2 | 815.08 | Gm5571     |

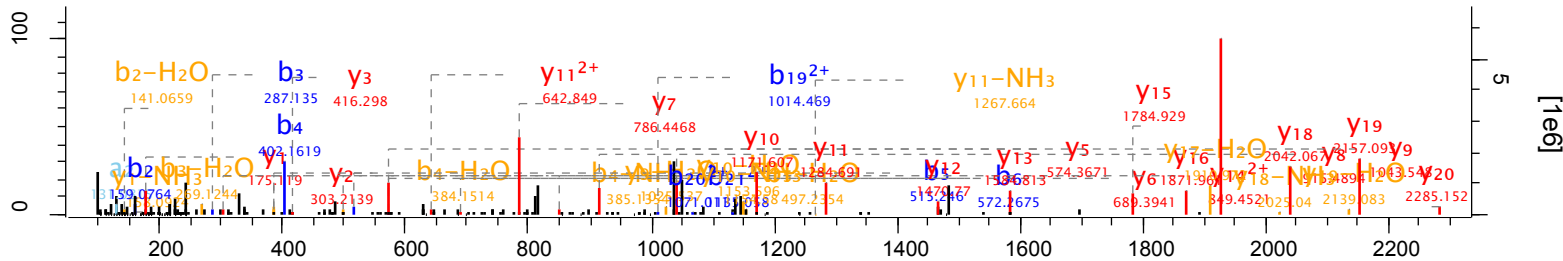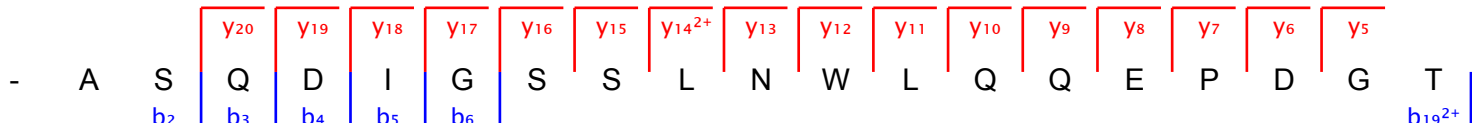

| Raw file                                      | Scan  | Method    | Score  | m/z    | Gene names |
|-----------------------------------------------|-------|-----------|--------|--------|------------|
| 20120630_EXQ2_AtDe_SA_WTR_OG_pooled_final_1_2 | 50373 | FTMS; HCD | 111.31 | 702.89 | Slc25a27   |

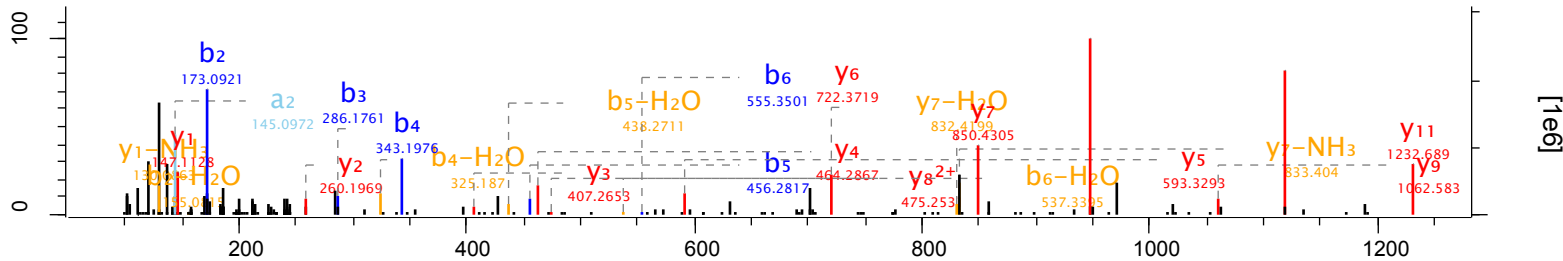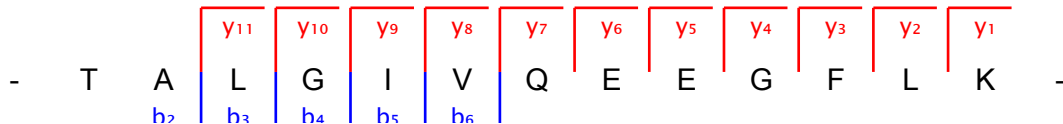

| Raw file                                      | Scan  | Method    | Score | m/z    | Gene names |
|-----------------------------------------------|-------|-----------|-------|--------|------------|
| 20120630_EXQ2_AtDe_SA_WTR_OG_pooled_final_1_2 | 64242 | FTMS; HCD | 99.41 | 1208.1 | Ly6a       |

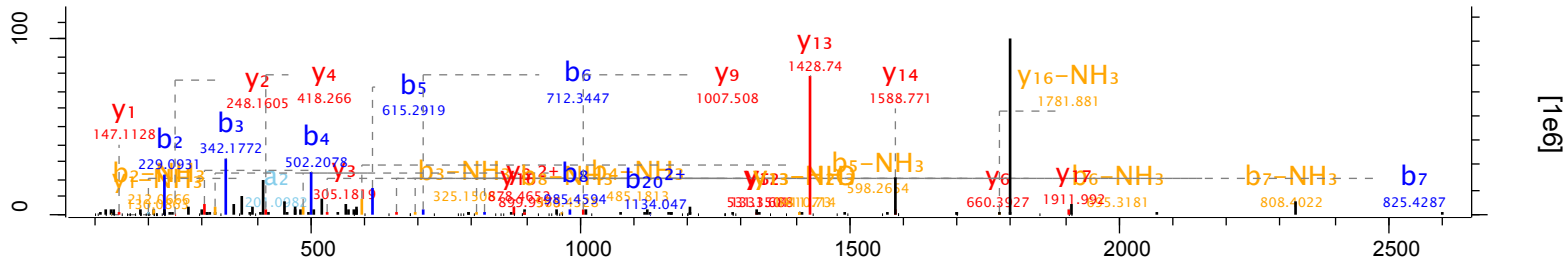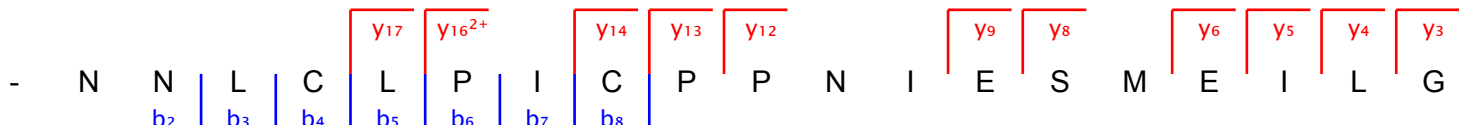

| Raw file                                      | Scan  | Method    | Score  | m/z   | Gene names |
|-----------------------------------------------|-------|-----------|--------|-------|------------|
| 20120630_EXQ2_AtDe_SA_WTR_OG_pooled_final_1_2 | 64246 | FTMS; HCD | 103.73 | 805.4 | Ly6a       |

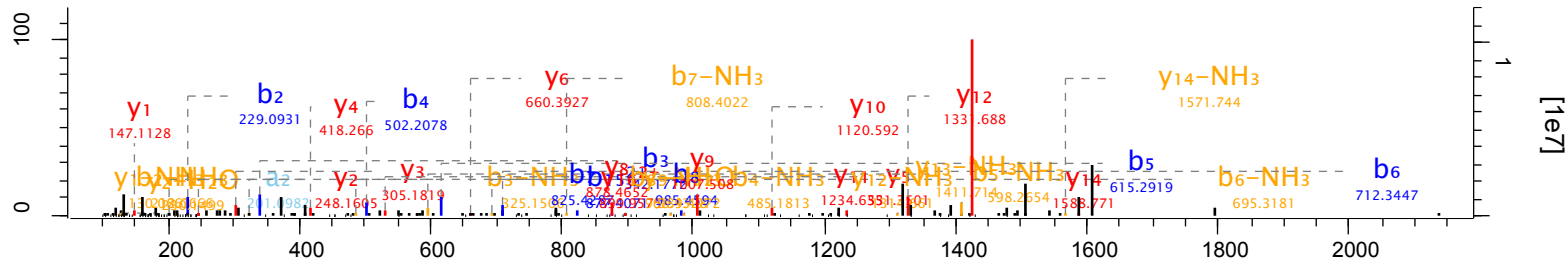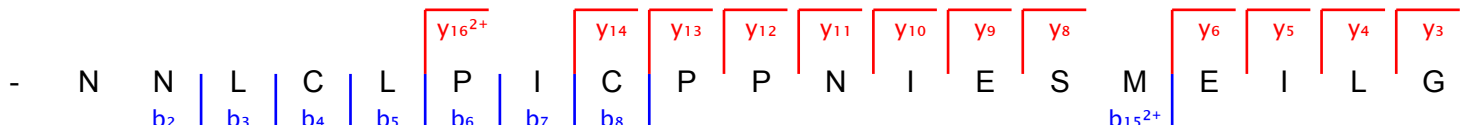

| Raw file                                      | Scan | Method    | Score | m/z    | Gene names |
|-----------------------------------------------|------|-----------|-------|--------|------------|
| 20120630_EXQ2_AtDe_SA_WTR_OG_pooled_final_1_2 | 7922 | FTMS; HCD | 79.49 | 409.53 | Sepw1      |

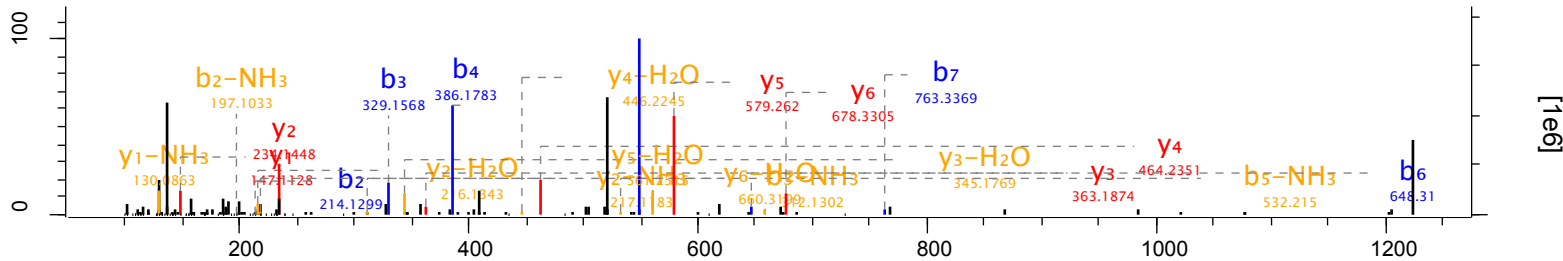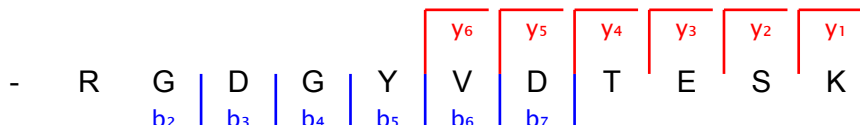

| Raw file                                      | Scan | Method    | Score | m/z    | Gene names |
|-----------------------------------------------|------|-----------|-------|--------|------------|
| 20120630_EXQ2_AtDe_SA_WTR_OG_pooled_final_1_2 | 8002 | FTMS; HCD | 76.82 | 547.57 | Adrb3      |

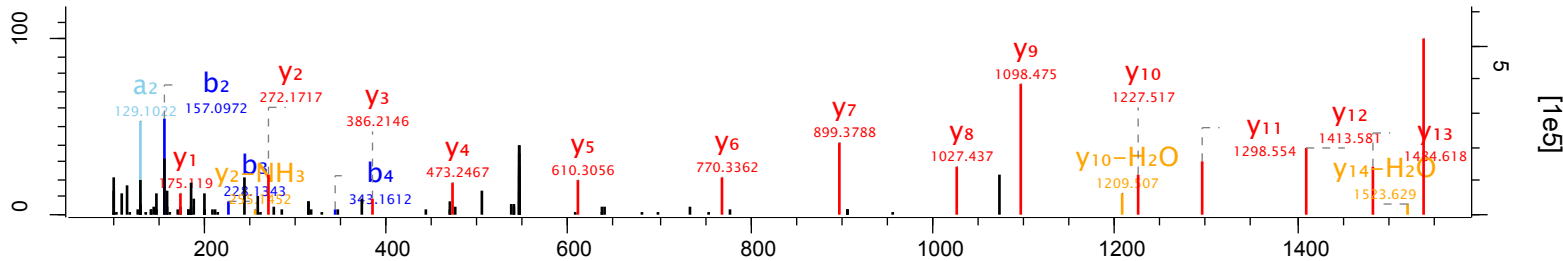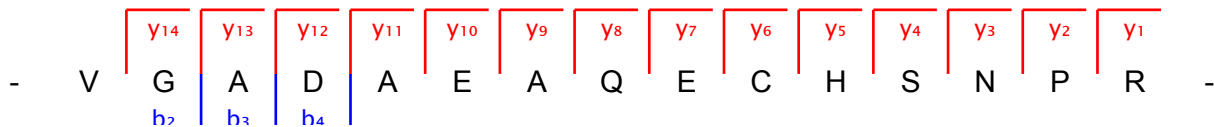



| Raw file                                      | Scan  | Method    | Score | m/z    | Gene names |
|-----------------------------------------------|-------|-----------|-------|--------|------------|
| 20120630_EXQ2_AtDe_SA_WTR_OG_pooled_final_1_3 | 14155 | FTMS; HCD | 144.3 | 696.67 | Flg2       |

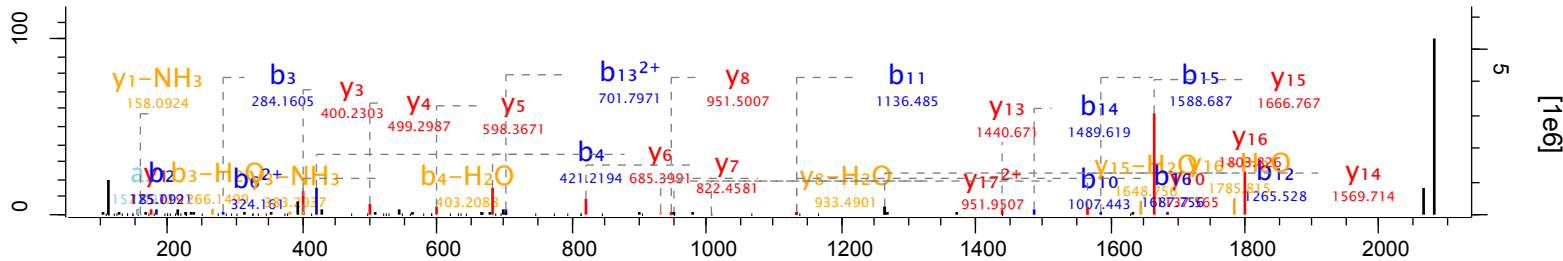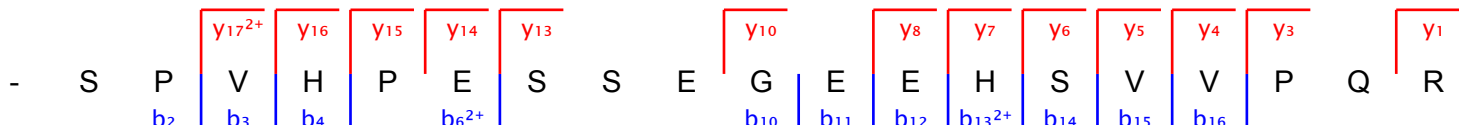

| Raw file                                      | Scan  | Method    | Score | m/z   | Gene names     |
|-----------------------------------------------|-------|-----------|-------|-------|----------------|
| 20120630_EXQ2_AtDe_SA_WTR_OG_pooled_final_1_3 | 26300 | FTMS; HCD | 44.04 | 921.4 | Krtap3-1;Krtap |

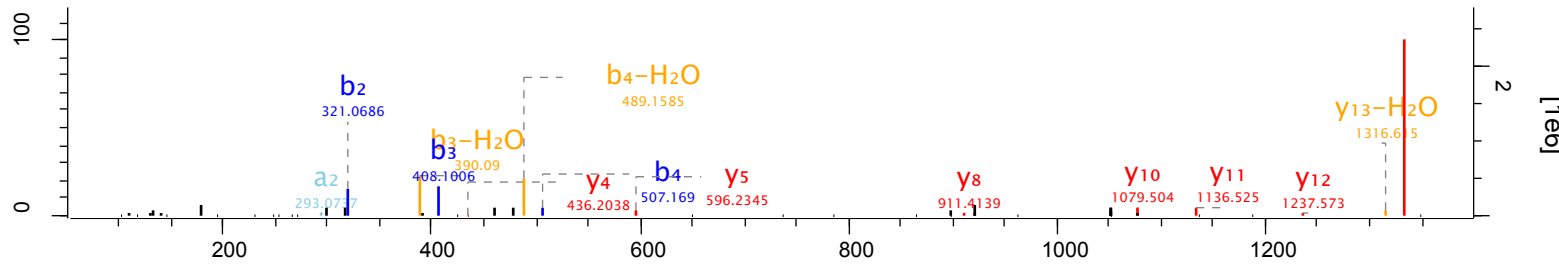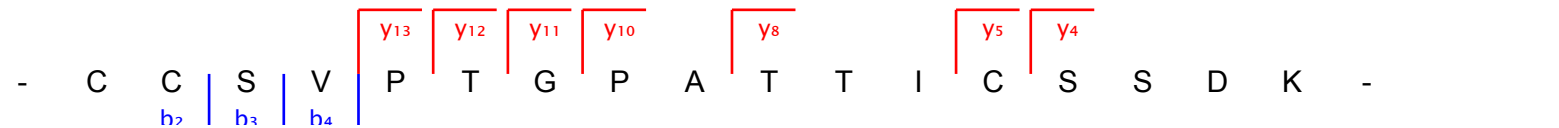

| Raw file                                      | Scan  | Method    | Score | m/z    | Gene names |
|-----------------------------------------------|-------|-----------|-------|--------|------------|
| 20120630_EXQ2_AtDe_SA_WTR_OG_pooled_final_1_3 | 47283 | FTMS; HCD | 92.26 | 654.03 | Gm5938     |

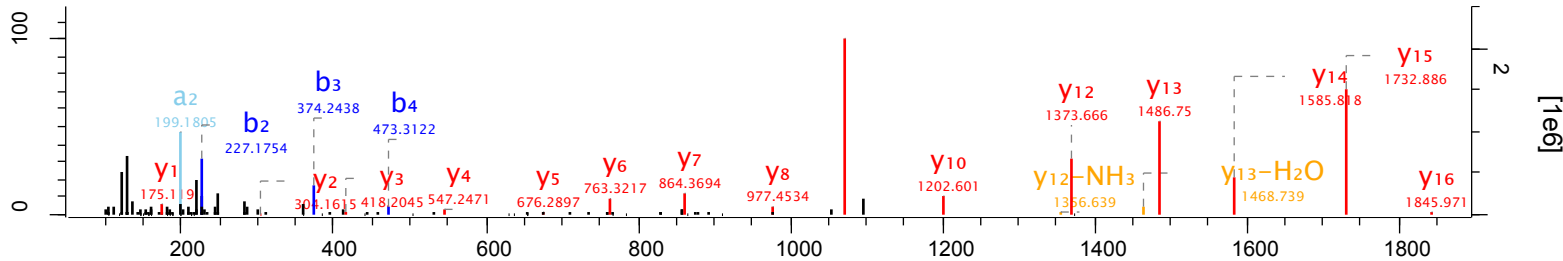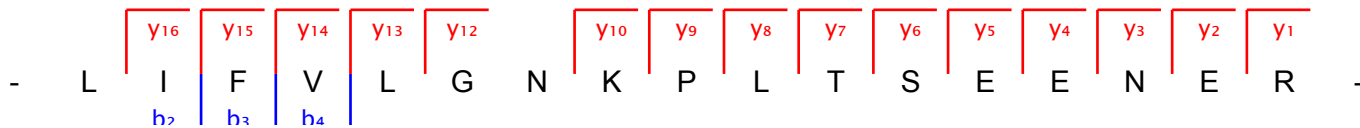

| Raw file                                      | Scan  | Method    | Score | m/z    | Gene names |
|-----------------------------------------------|-------|-----------|-------|--------|------------|
| 20120630_EXQ2_AtDe_SA_WTR_OG_pooled_final_1_3 | 47630 | FTMS; HCD | 92.1  | 577.56 | Sec1415    |

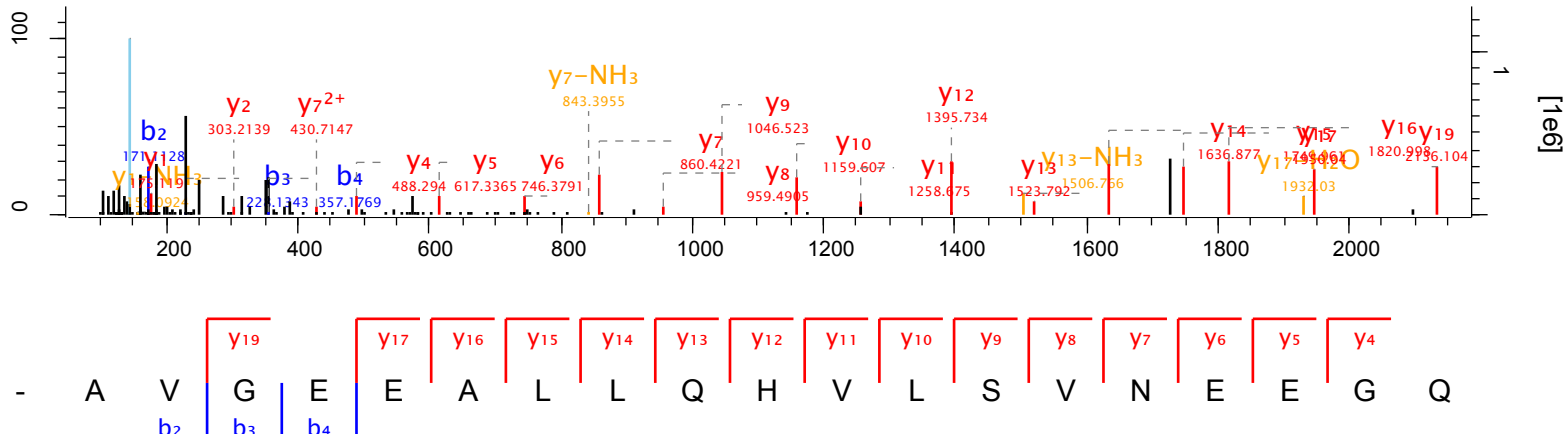

| Raw file                                      | Scan  | Method    | Score | m/z    | Gene names |
|-----------------------------------------------|-------|-----------|-------|--------|------------|
| 20120630_EXQ2_AtDe_SA_WTR_OG_pooled_final_1_3 | 47971 | FTMS; HCD | 81.65 | 611.67 | Slc38a3    |

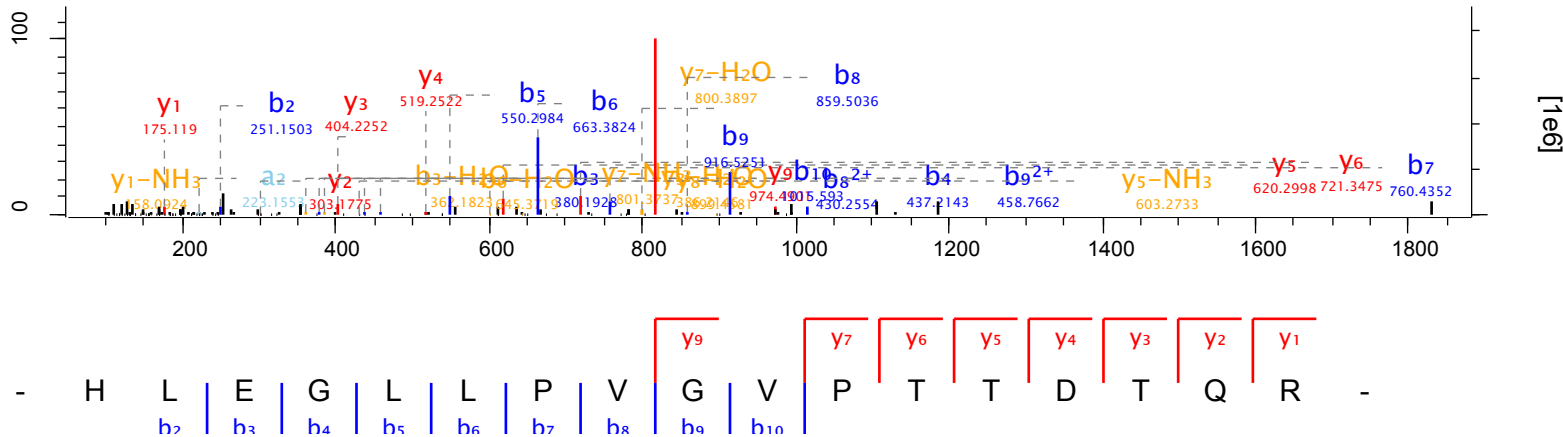

| Raw file                                      | Scan  | Method    | Score | m/z   | Gene names |
|-----------------------------------------------|-------|-----------|-------|-------|------------|
| 20120630_EXQ2_AtDe_SA_WTR_OG_pooled_final_1_3 | 51535 | FTMS; HCD | 70.32 | 584.1 | Slc26a6    |

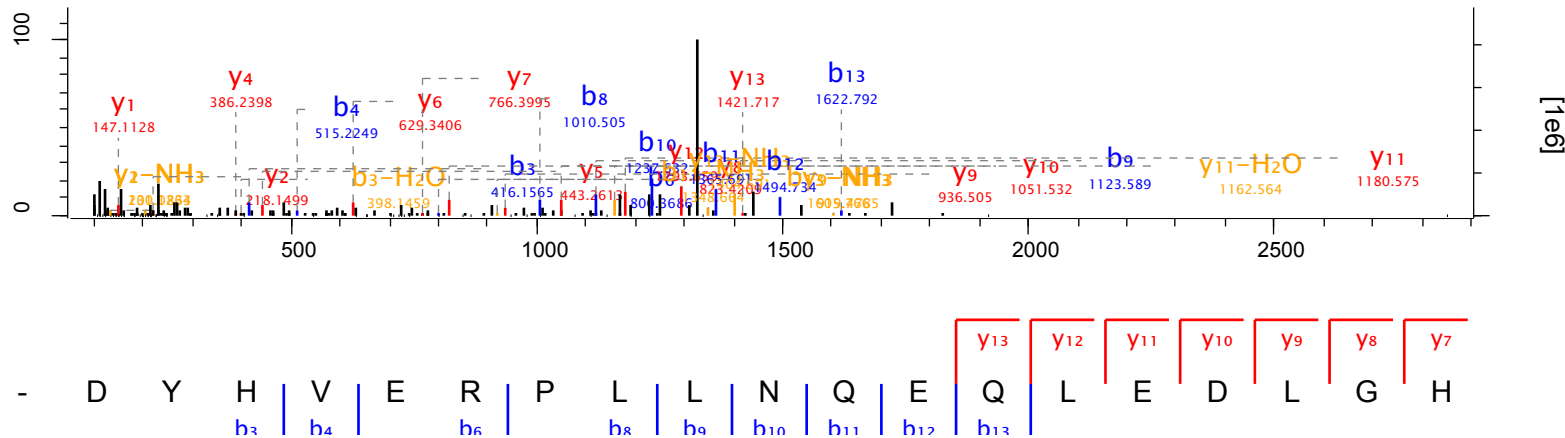

| Raw file                                      | Scan  | Method    | Score | m/z    | Gene names |
|-----------------------------------------------|-------|-----------|-------|--------|------------|
| 20120630_EXQ2_AtDe_SA_WTR_OG_pooled_final_1_3 | 59563 | FTMS; HCD | 42.5  | 617.81 | Dusp26     |

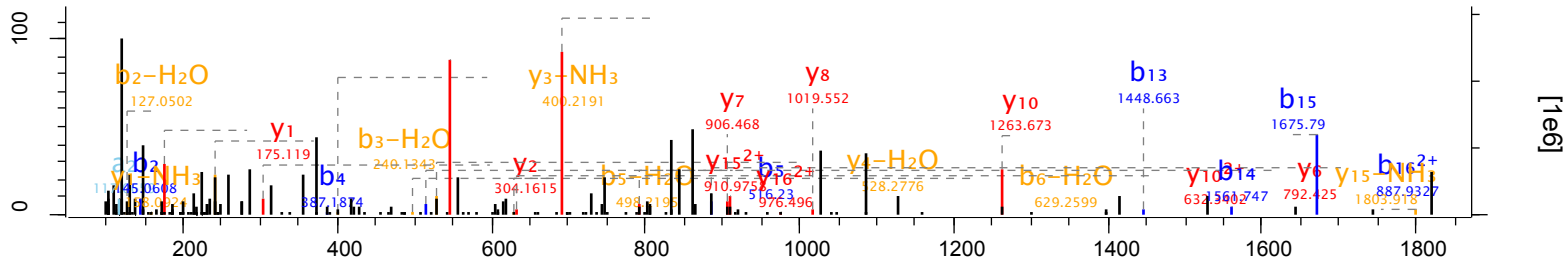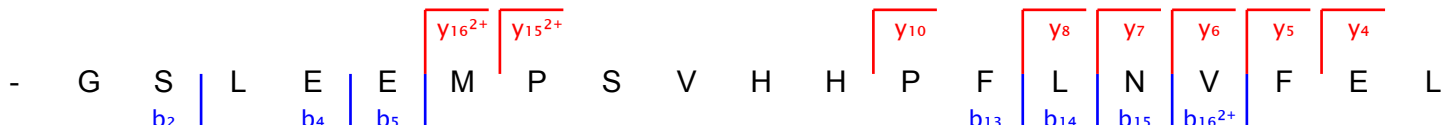

| Raw file                                      | Scan  | Method    | Score  | m/z   | Gene names |
|-----------------------------------------------|-------|-----------|--------|-------|------------|
| 20120630_EXQ2_AtDe_SA_WTR_OG_pooled_final_1_4 | 14439 | FTMS; HCD | 114.24 | 627.3 | Dbnidd2    |

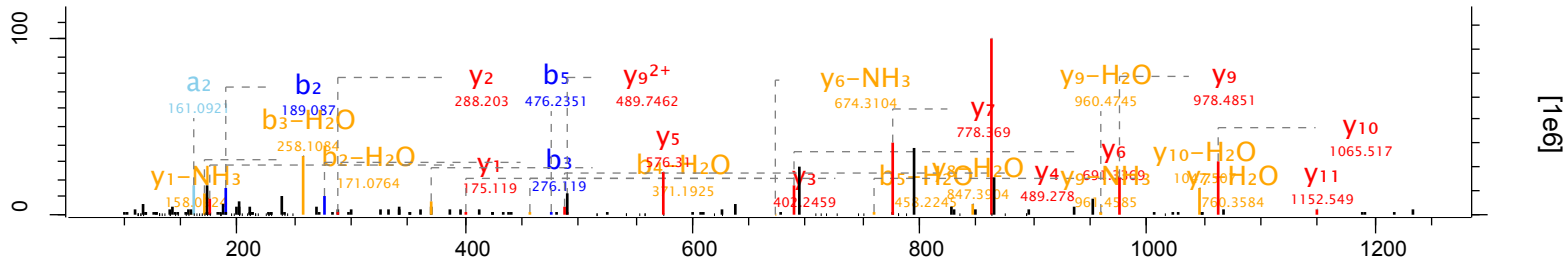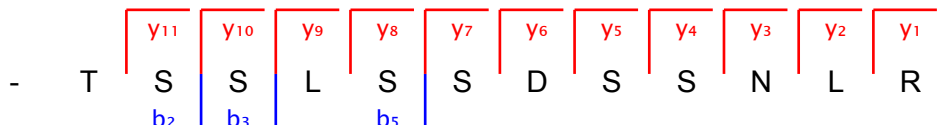



| Raw file                                      | Scan  | Method    | Score | m/z    | Gene names |
|-----------------------------------------------|-------|-----------|-------|--------|------------|
| 20120630_EXQ2_AtDe_SA_WTR_OG_pooled_final_1_4 | 16413 | FTMS; HCD | 78.32 | 657.81 | C5ar1      |

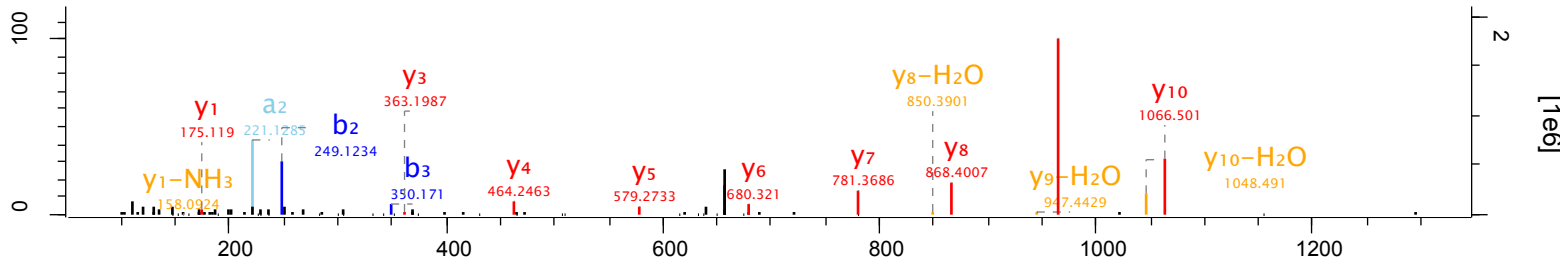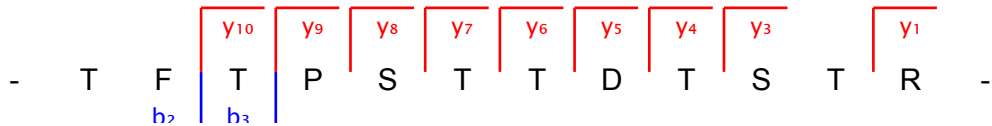

Raw file

20120630\_EXQ2\_AtDe\_SA\_WTR\_OG\_pooled\_final\_1\_4

Scan

17970

Method

FTMS; HCD

Score

135.81

m/z

725.83

Gene names

Smim1

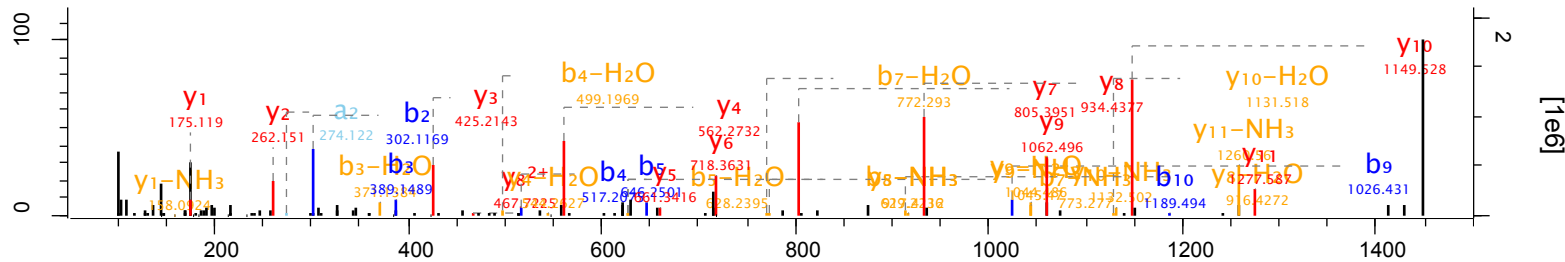

ac

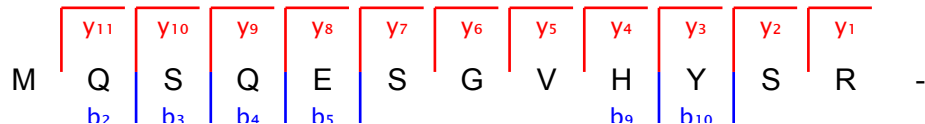

Raw file

Scan

Method

Score

m/z

20120630\_EXQ2\_AtDe\_SA\_WTR\_OG\_pooled\_final\_1\_4

25726

FTMS; HCD

13.33

543.26

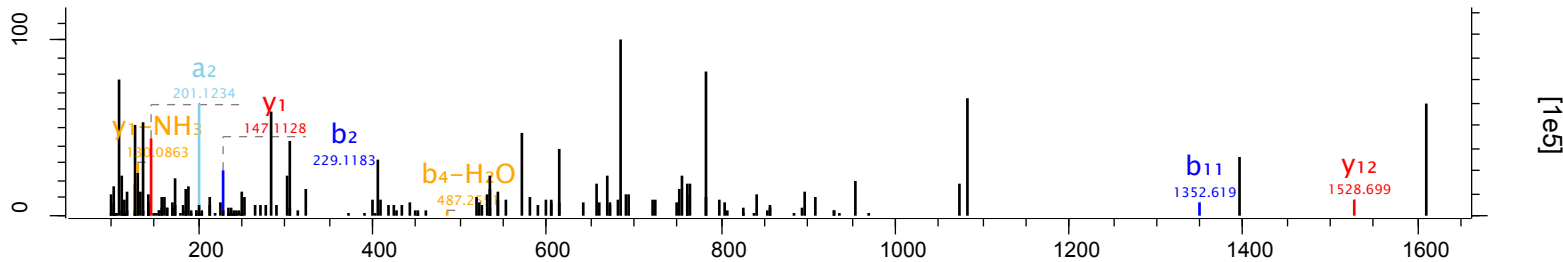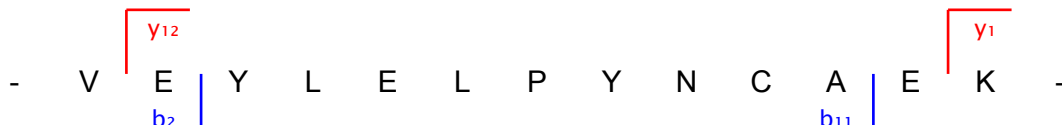

| Raw file                                      | Scan  | Method    | Score | m/z   | Gene names     |
|-----------------------------------------------|-------|-----------|-------|-------|----------------|
| 20120630_EXQ2_AtDe_SA_WTR_OG_pooled_final_1_4 | 25894 | FTMS; HCD | 80.36 | 920.9 | Krtap3-1;Krtap |

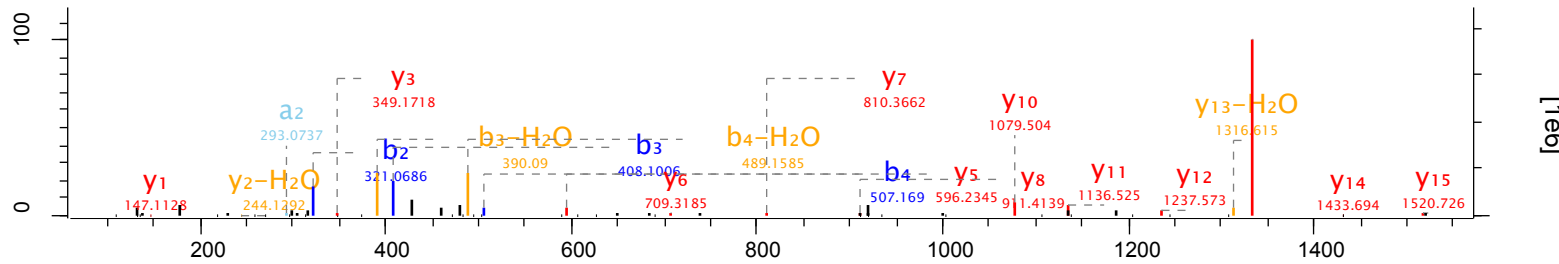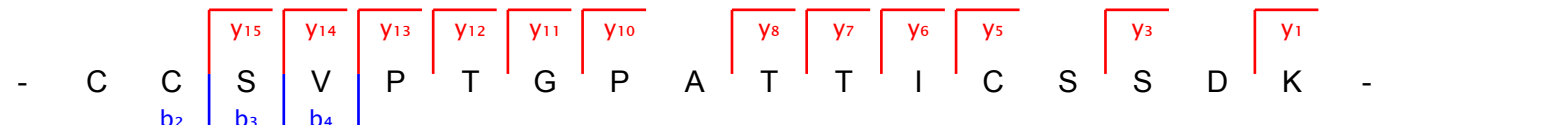

| Raw file                                      | Scan  | Method    | Score | m/z    | Gene names |
|-----------------------------------------------|-------|-----------|-------|--------|------------|
| 20120630_EXQ2_AtDe_SA_WTR_OG_pooled_final_1_4 | 26314 | FTMS; HCD | 39.37 | 720.37 | Sdc3       |

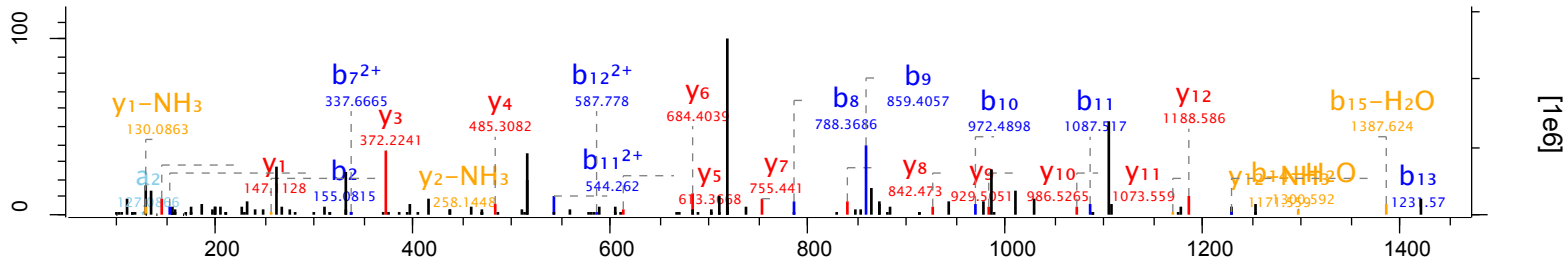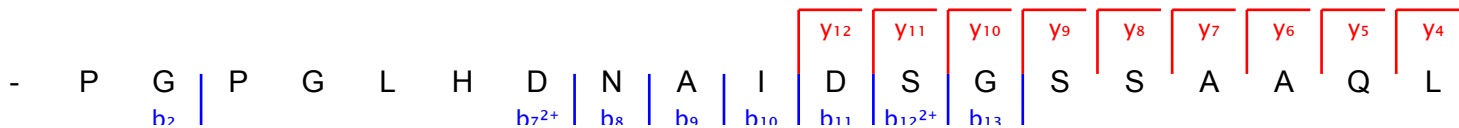

Raw file

Scan

Method

Score

m/z

Gene names

20120630\_EXQ2\_AtDe\_SA\_WTR\_OG\_pooled\_final\_1\_4

27380

FTMS; HCD

100.43

858.89

Elovl6

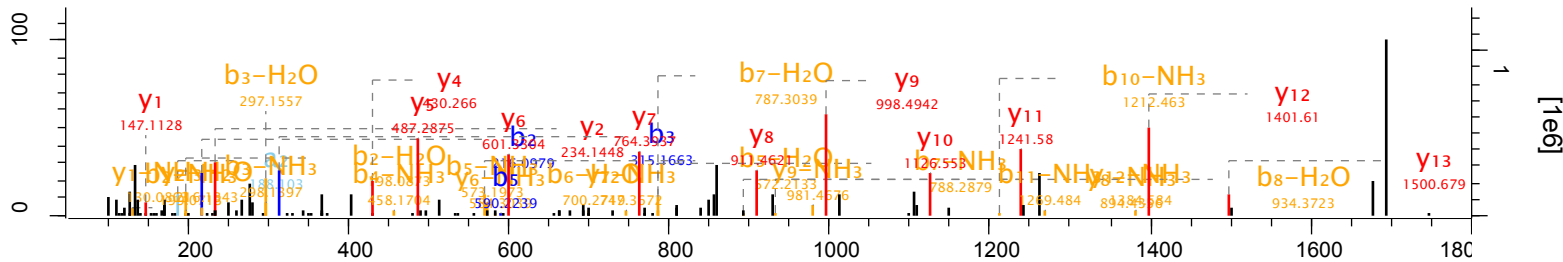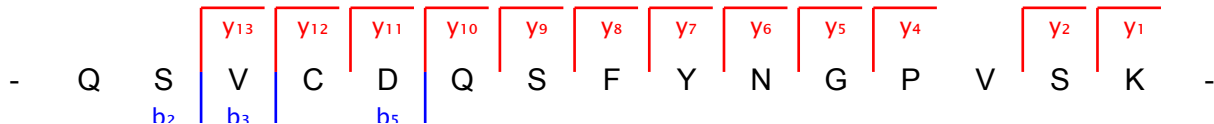

| Raw file                                      | Scan  | Method    | Score | m/z    | Gene names |
|-----------------------------------------------|-------|-----------|-------|--------|------------|
| 20120630_EXQ2_AtDe_SA_WTR_OG_pooled_final_1_4 | 37771 | FTMS; HCD | 45.54 | 809.43 | Retnla     |

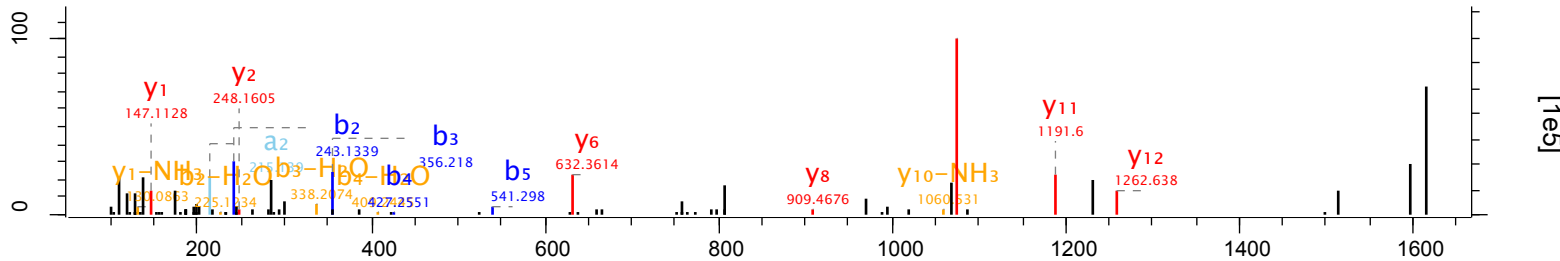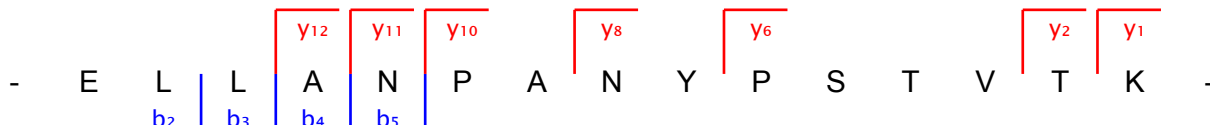

| Raw file                                      | Scan  | Method    | Score | m/z    | Gene names |
|-----------------------------------------------|-------|-----------|-------|--------|------------|
| 20120630_EXQ2_AtDe_SA_WTR_OG_pooled_final_1_4 | 42653 | FTMS; HCD | 71.38 | 751.68 | Mettl21c   |

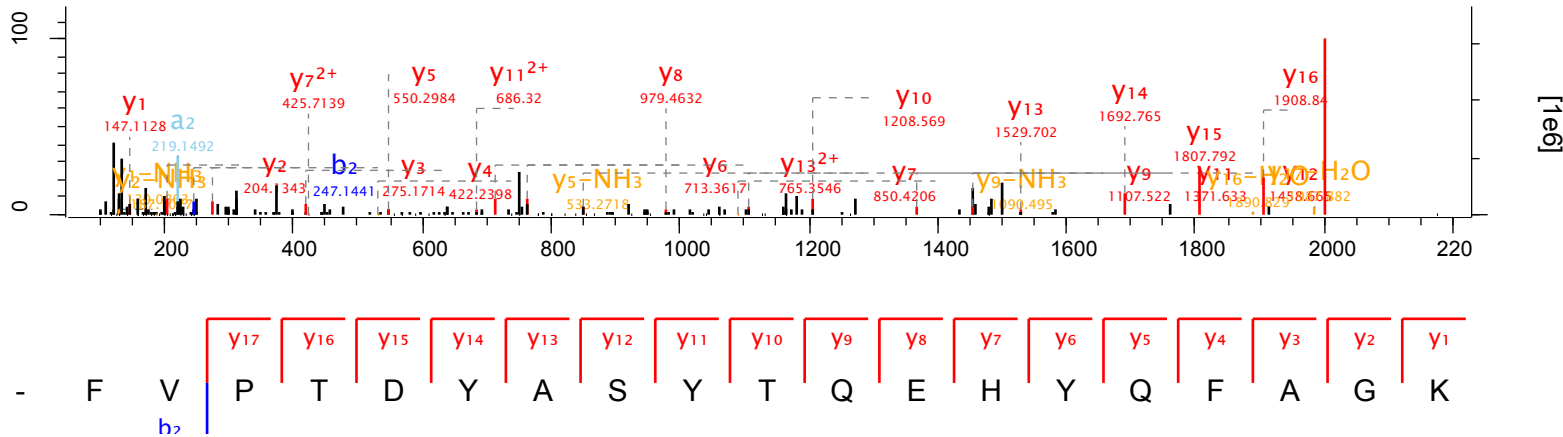



| Raw file                                      | Scan  | Method    | Score  | m/z   | Gene names |
|-----------------------------------------------|-------|-----------|--------|-------|------------|
| 20120630_EXQ2_AtDe_SA_WTR_OG_pooled_final_1_4 | 45974 | FTMS; HCD | 112.17 | 807.9 | Aqp7       |

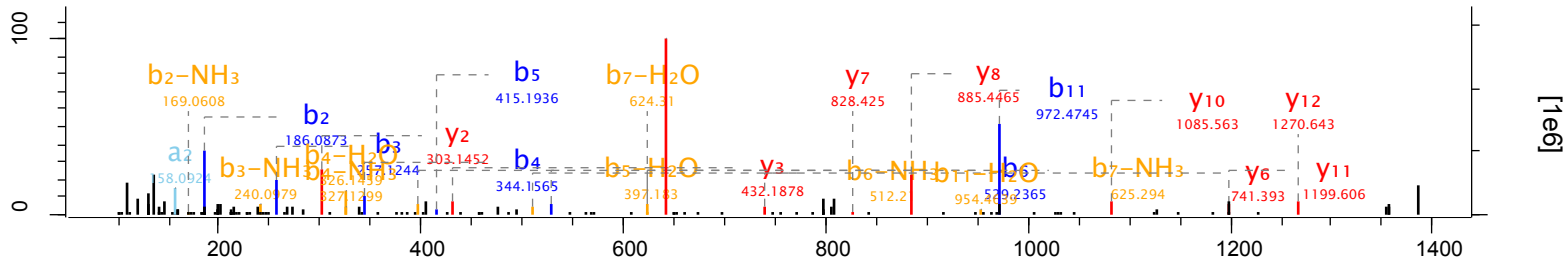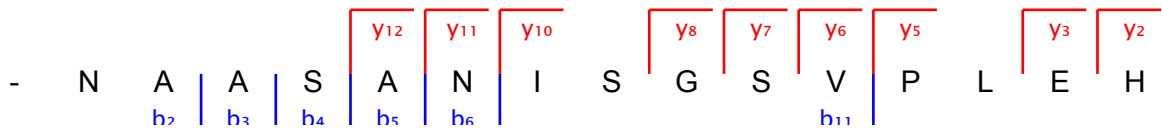

| Raw file                                      | Scan  | Method    | Score | m/z     | Gene name |
|-----------------------------------------------|-------|-----------|-------|---------|-----------|
| 20120630_EXQ2_AtDe_SA_WTR_OG_pooled_final_1_4 | 51750 | FTMS; HCD | 85.8  | 1021.05 | Eva1b     |

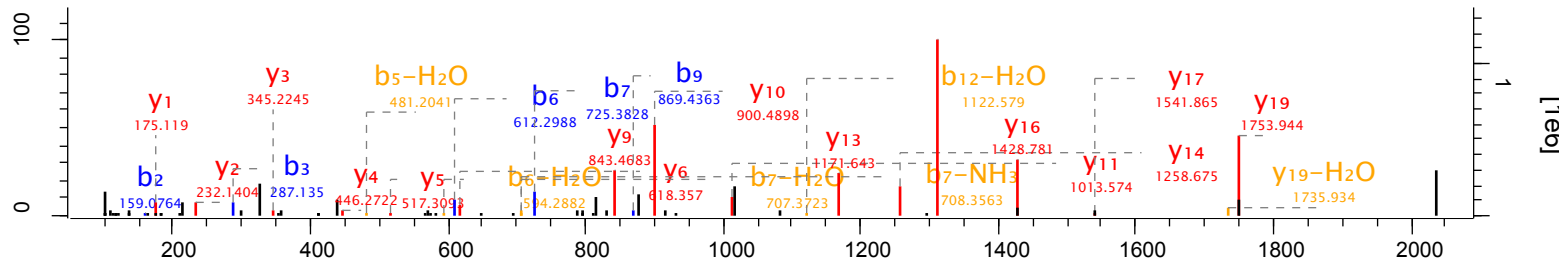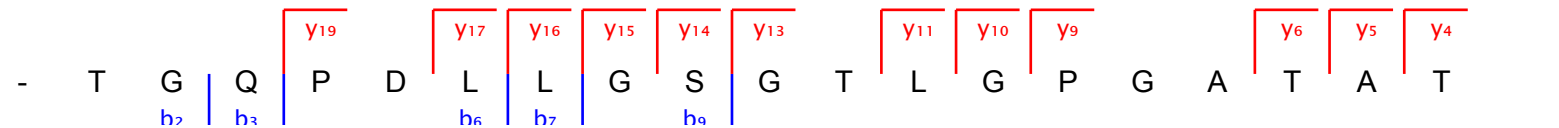

| Raw file                                      | Scan  | Method    | Score | m/z    | Gene names |
|-----------------------------------------------|-------|-----------|-------|--------|------------|
| 20120630_EXQ2_AtDe_SA_WTR_OG_pooled_final_1_4 | 54302 | FTMS; HCD | 58.86 | 1013.2 | Padi4      |

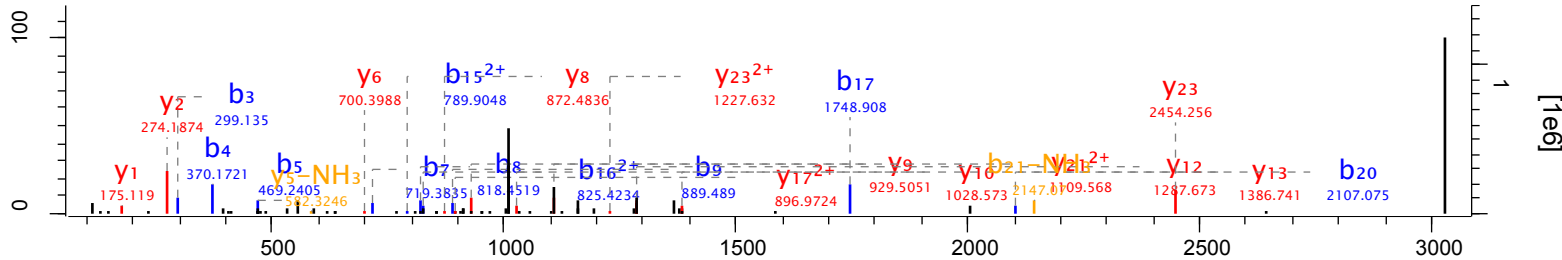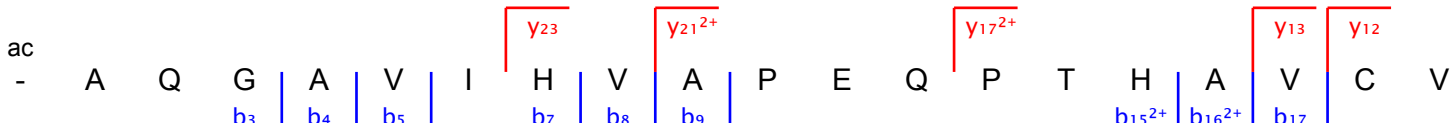

Raw file

Scan

Method

Score

m/z

20120630\_EXQ2\_AtDe\_SA\_WTR\_OG\_pooled\_final\_1\_4

56964

FTMS; HCD

118.21

859.48

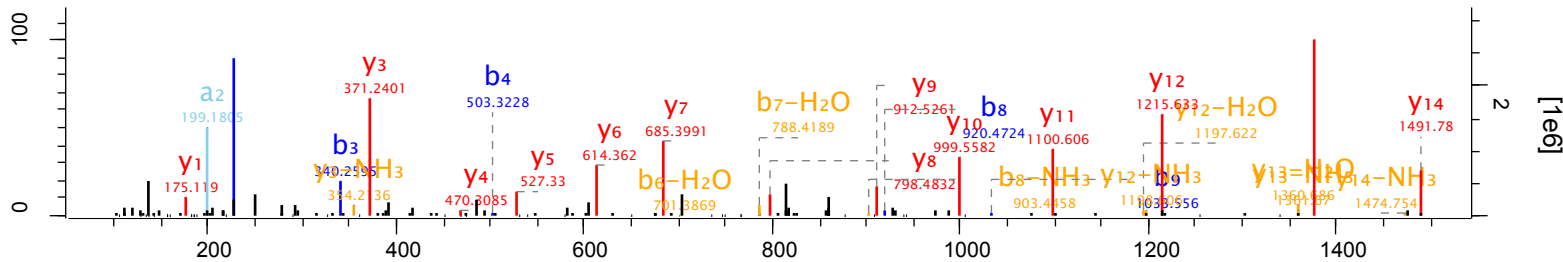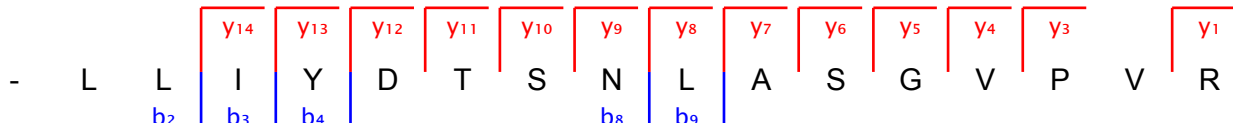

Raw file

Scan

Method

Score

m/z

20120630\_EXQ2\_AtDe\_SA\_WTR\_OG\_pooled\_final\_1\_4

58549

FTMS; HCD

92.87

635.85

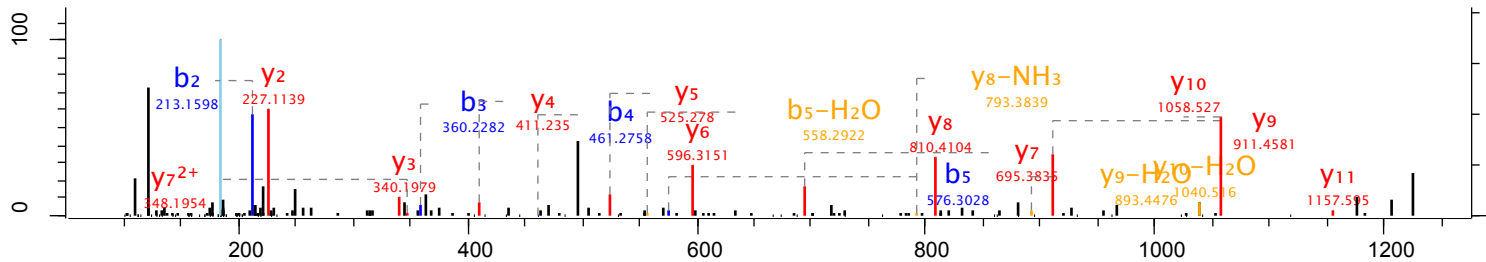

[1e6]

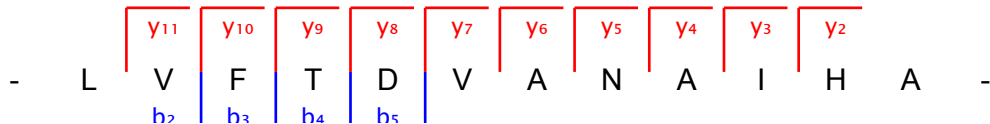

Raw file

20120630\_EXQ2\_AtDe\_SA\_WTR\_OG\_pooled\_final\_1\_4

Scan

65151

Method

FTMS; HCD

Score

93.78

m/z

1100.09

Gene name

Serinc2

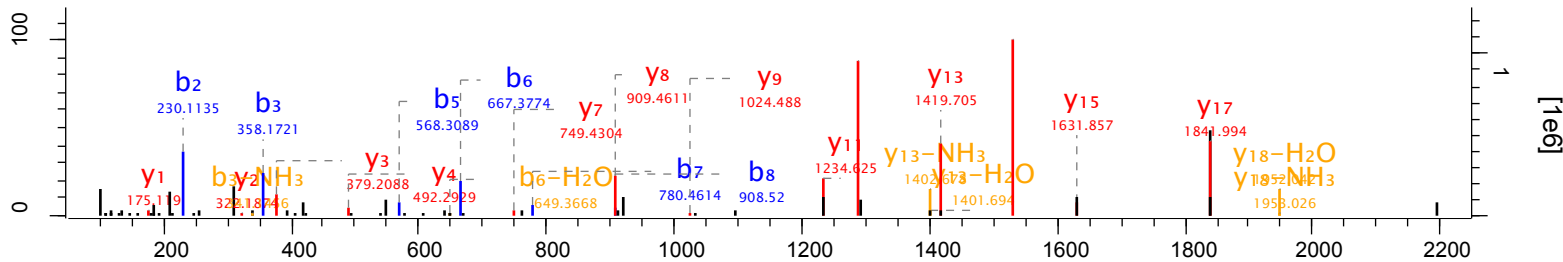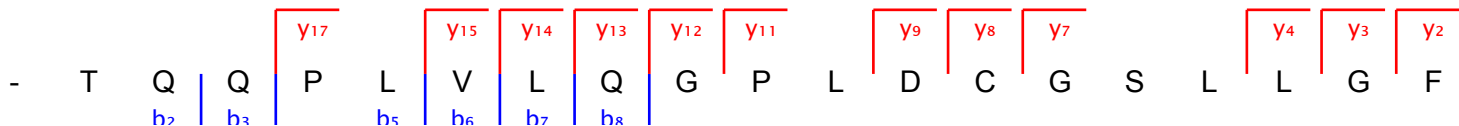

| Raw file                                      | Scan  | Method    | Score | m/z    | Gene names |
|-----------------------------------------------|-------|-----------|-------|--------|------------|
| 20120630_EXQ2_AtDe_SA_WTR_OG_pooled_final_1_4 | 65286 | FTMS; HCD | 43.85 | 695.38 | Mfap4      |

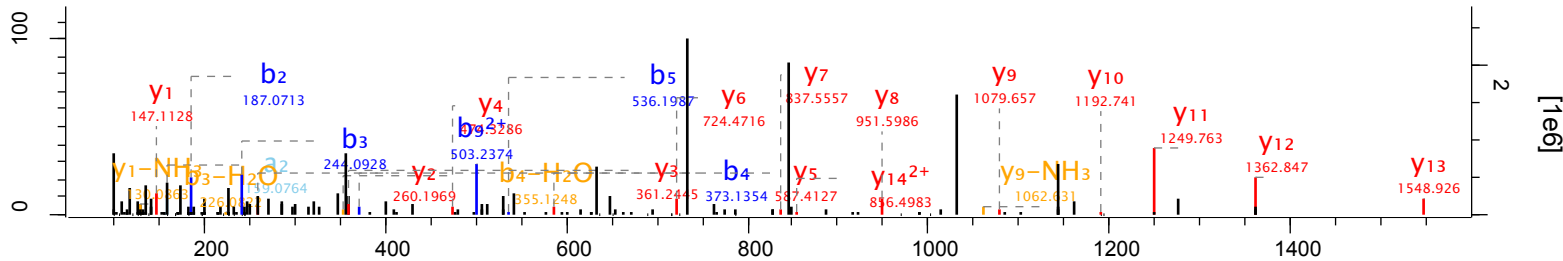

Sequence diagram showing amino acid residues and their corresponding b and y ion labels:

- A D G E Y W L G L Q N L H L L T L K -

Labels below residues (from left to right):

- h<sub>2</sub> (under D)
- h<sub>3</sub> (under G)
- h<sub>4</sub> (under E)
- h<sub>5</sub> (under Y)
- h<sub>9</sub><sup>2+</sup> (under L)

Labels above residues (from right to left):

- y<sub>1</sub> (under K)
- y<sub>2</sub> (under L)
- y<sub>3</sub> (under T)
- y<sub>4</sub> (under L)
- y<sub>5</sub> (under L)
- y<sub>6</sub> (under H)
- y<sub>7</sub> (under L)
- y<sub>8</sub> (under N)
- y<sub>9</sub> (under Q)
- y<sub>10</sub> (under L)
- y<sub>11</sub> (under G)
- y<sub>12</sub> (under L)
- y<sub>13</sub> (under W)
- y<sub>14</sub><sup>2+</sup> (under Y)

| Raw file                                      | Scan  | Method    | Score  | m/z     | Gene name |
|-----------------------------------------------|-------|-----------|--------|---------|-----------|
| 20120630_EXQ2_AtDe_SA_WTR_OG_pooled_final_1_4 | 65308 | FTMS; HCD | 162.77 | 1043.07 | Mfap4     |

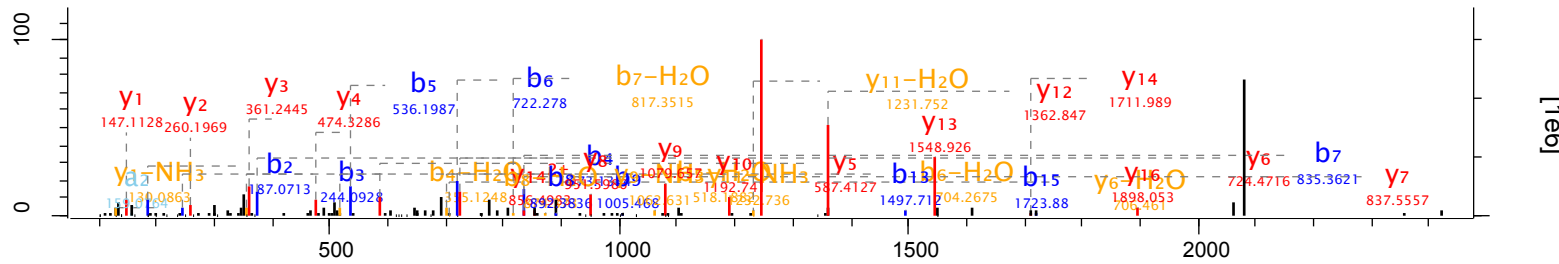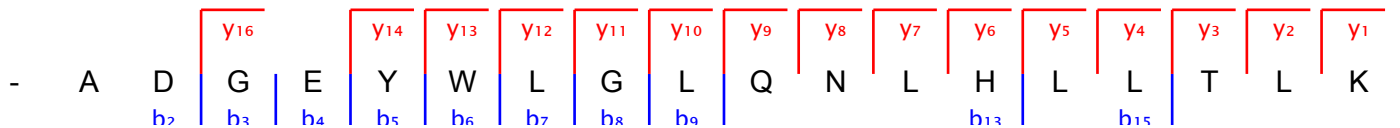



Raw file

20120630\_EXQ2\_AtDe\_SA\_WTR\_OG\_pooled\_final\_1\_4

Scan

65311

Method

FTMS; HCD

Score

187.78

m/z

695.71

Gene names

Mfap4

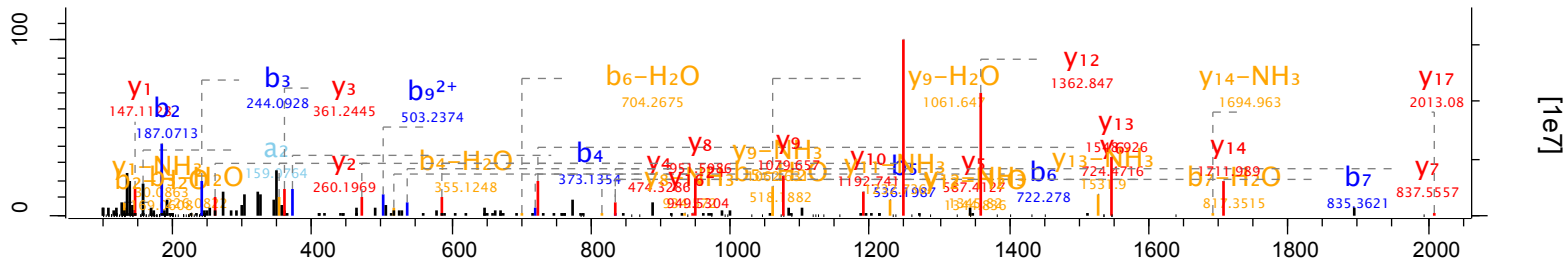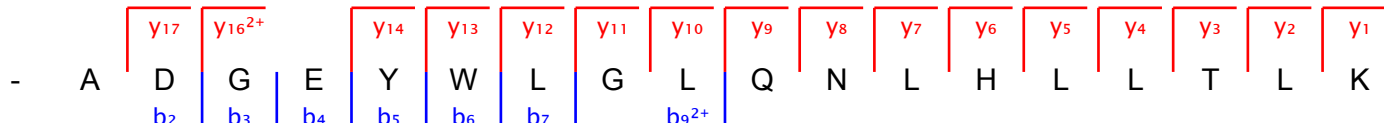

| Raw file                                      | Scan  | Method    | Score  | m/z    | Gene names |
|-----------------------------------------------|-------|-----------|--------|--------|------------|
| 20120630_EXQ2_AtDe_SA_WTR_OG_pooled_final_1_4 | 65323 | FTMS; HCD | 131.12 | 715.91 | Uqcr11     |

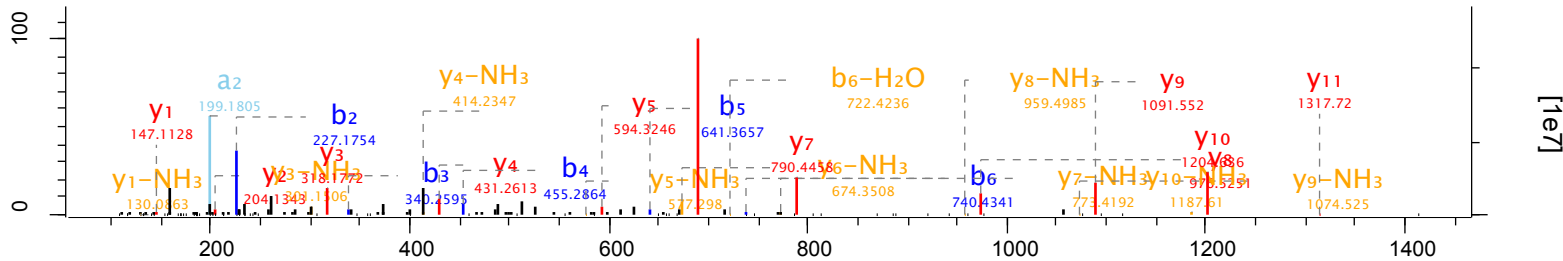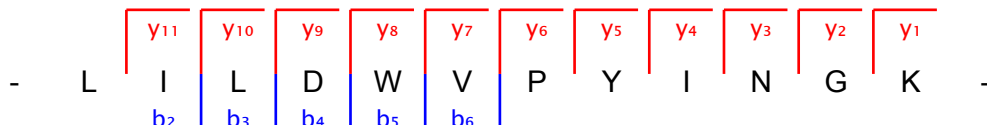

| Raw file                                      | Scan  | Method    | Score | m/z    | Gene names |
|-----------------------------------------------|-------|-----------|-------|--------|------------|
| 20120630_EXQ2_AtDe_SA_WTR_OG_pooled_final_1_6 | 20330 | FTMS; HCD | 65.42 | 676.01 | Stard10    |

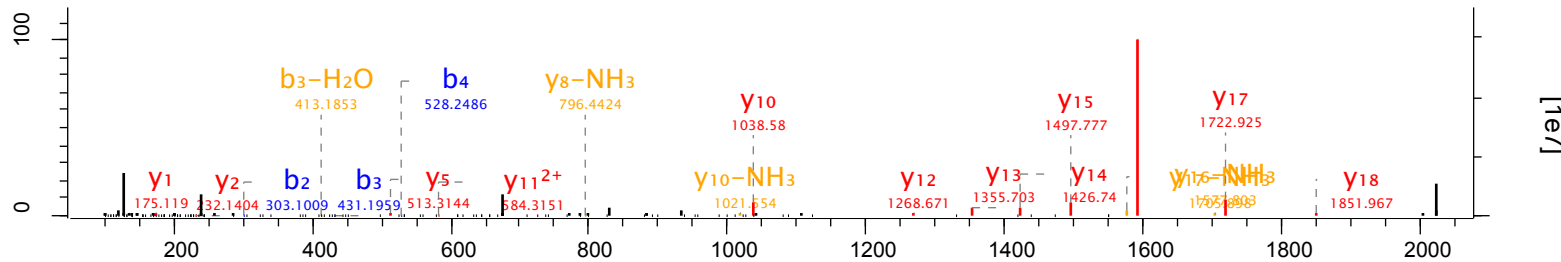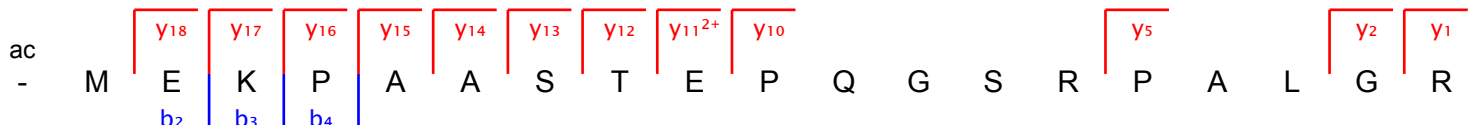

| Raw file                                      | Scan  | Method    | Score | m/z    | Gene names |
|-----------------------------------------------|-------|-----------|-------|--------|------------|
| 20120630_EXQ2_AtDe_SA_WTR_OG_pooled_final_1_6 | 27046 | FTMS; HCD | 154.7 | 705.88 | Rps16      |

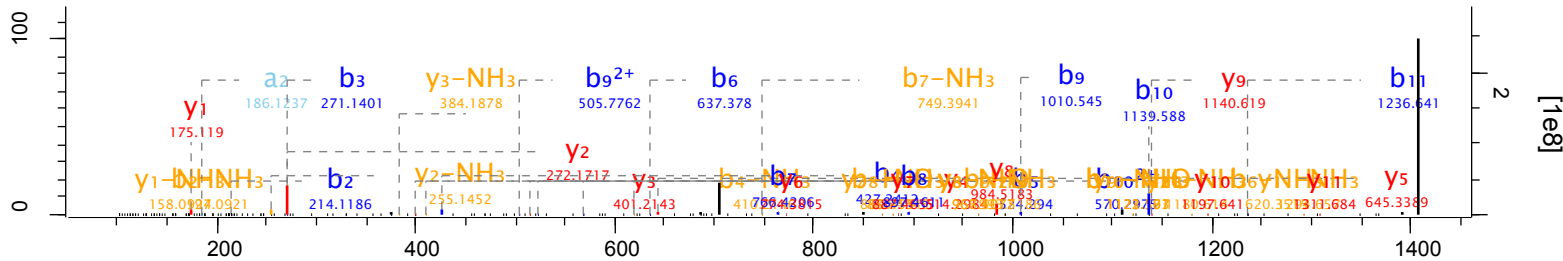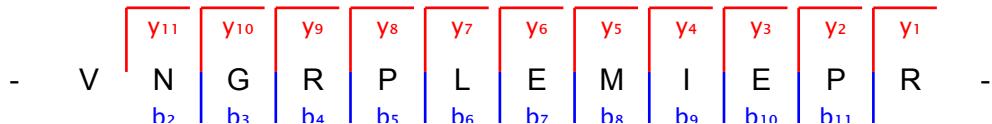

| Raw file                                      | Scan  | Method    | Score | m/z    | Gene names  |
|-----------------------------------------------|-------|-----------|-------|--------|-------------|
| 20120630_EXQ2_AtDe_SA_WTR_OG_pooled_final_1_6 | 30091 | FTMS; HCD | 94.11 | 524.78 | 4933433C111 |

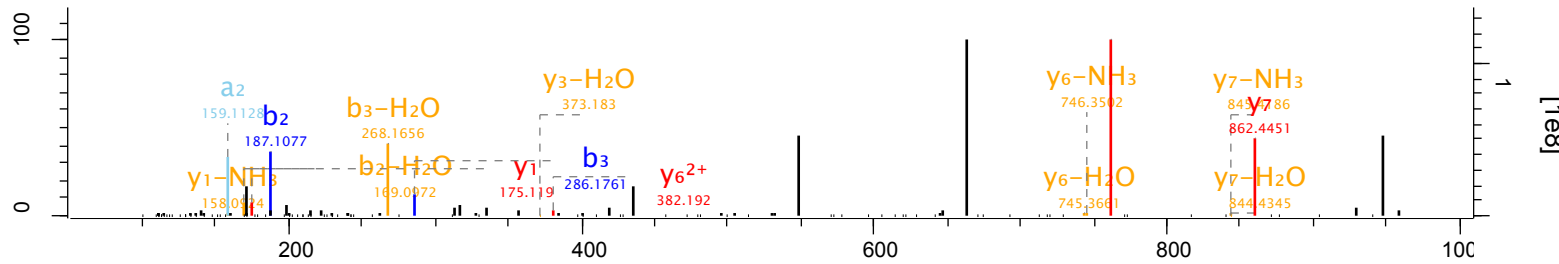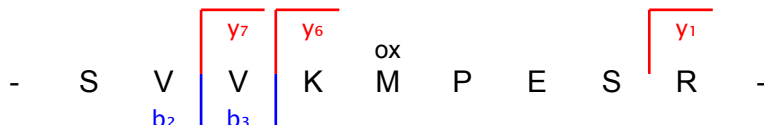

Raw file

Scan

Method

Score

m/z

20120630\_EXQ2\_AtDe\_SA\_WTR\_OG\_pooled\_final\_1\_6

34781

FTMS; HCD

87.68

619.02

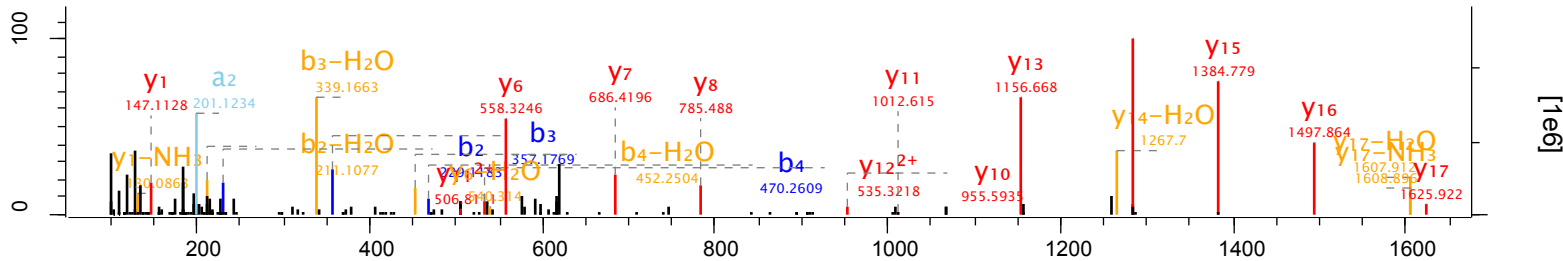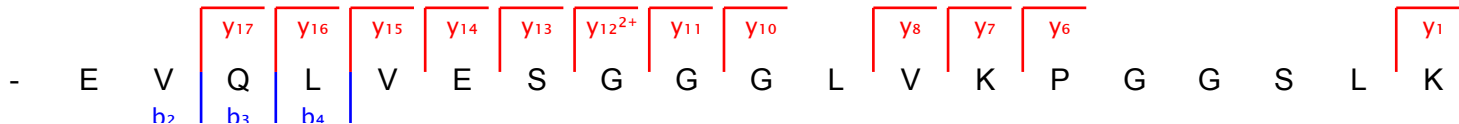

Raw file

Scan

Method

Score

m/z

20120630\_EXQ2\_AtDe\_SA\_WTR\_OG\_pooled\_final\_1\_6

34837

FTMS; HCD

80.86

928.02

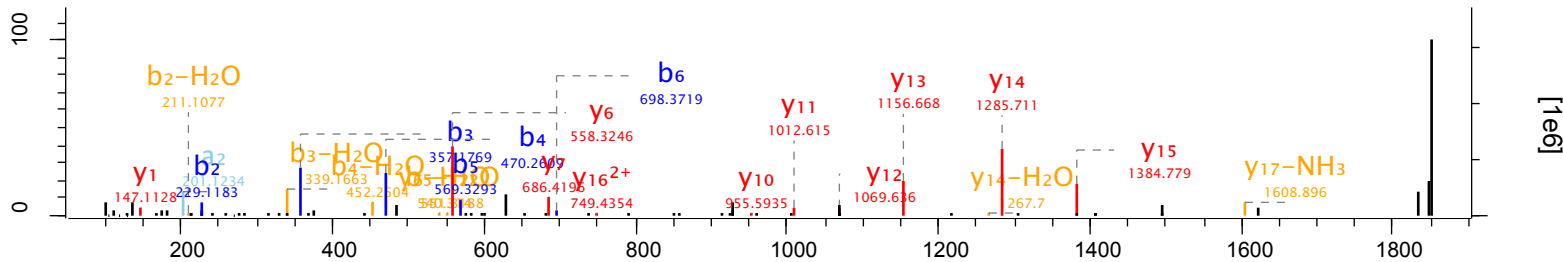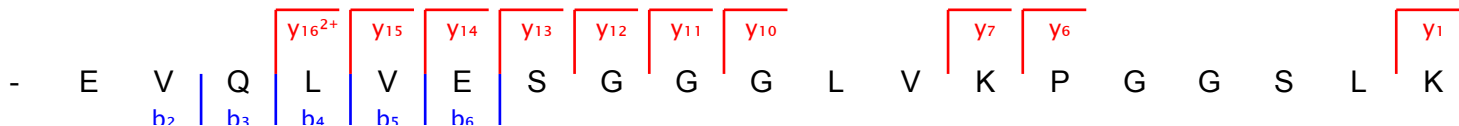

Raw file

20120630\_EXQ2\_AtDe\_SA\_WTR\_OG\_pooled\_final\_1\_6

Scan

35212

Method

FTMS; HCD

Score

78.29

m/z

688.35

Gene names

2010107G23

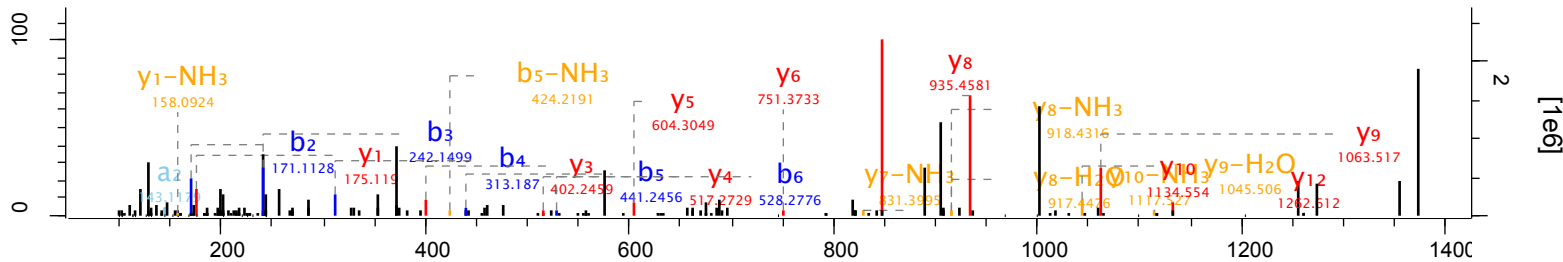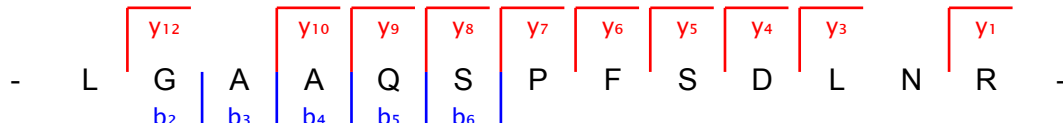



| Raw file                                      | Scan  | Method    | Score | m/z    | Gene names |
|-----------------------------------------------|-------|-----------|-------|--------|------------|
| 20120630_EXQ2_AtDe_SA_WTR_OG_pooled_final_1_6 | 44679 | FTMS; HCD | 84.48 | 564.86 | Pet117     |

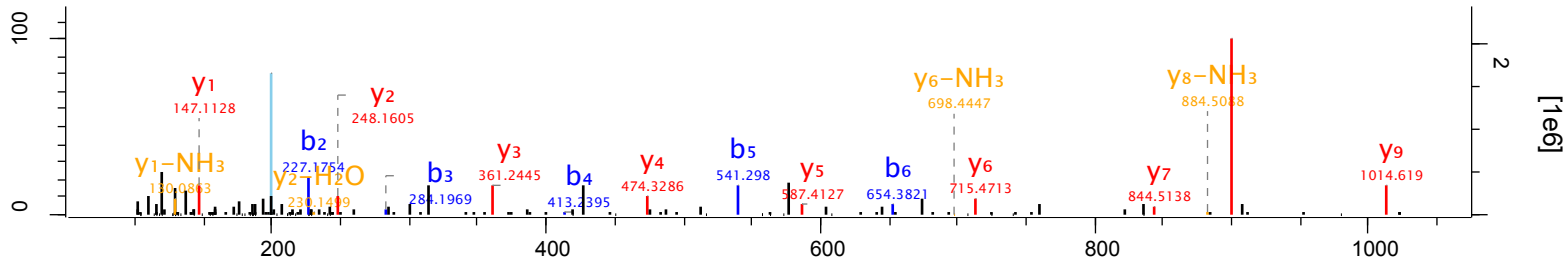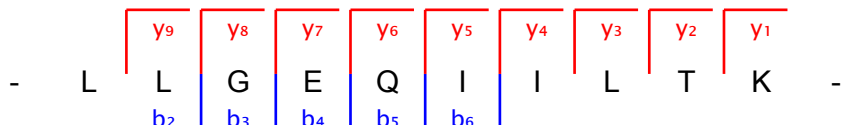

| Raw file                                      | Scan  | Method    | Score  | m/z    | Gene names |
|-----------------------------------------------|-------|-----------|--------|--------|------------|
| 20120630_EXQ2_AtDe_SA_WTR_OG_pooled_final_1_6 | 47195 | FTMS; HCD | 169.58 | 708.34 | Ndufa1     |

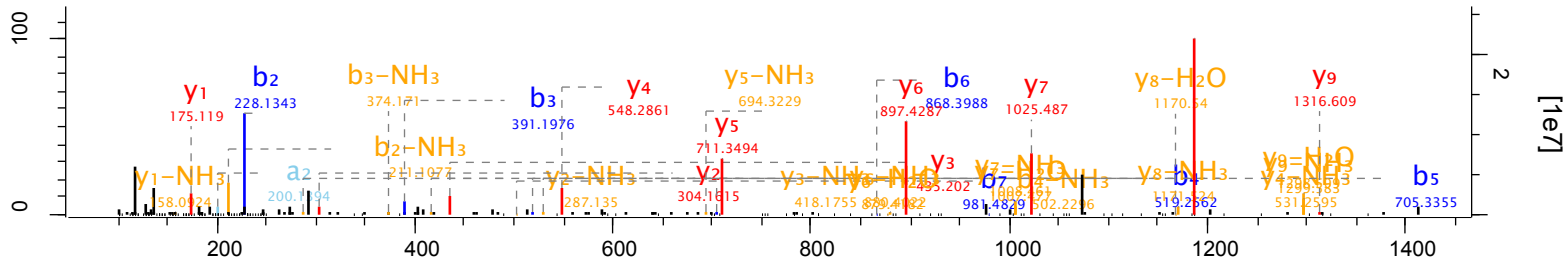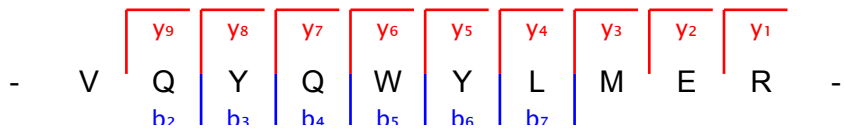

| Raw file                                      | Scan  | Method    | Score | m/z    | Gene names |
|-----------------------------------------------|-------|-----------|-------|--------|------------|
| 20120630_EXQ2_AtDe_SA_WTR_OG_pooled_final_1_6 | 47620 | FTMS; HCD | 51.98 | 708.34 | Ndufa1     |

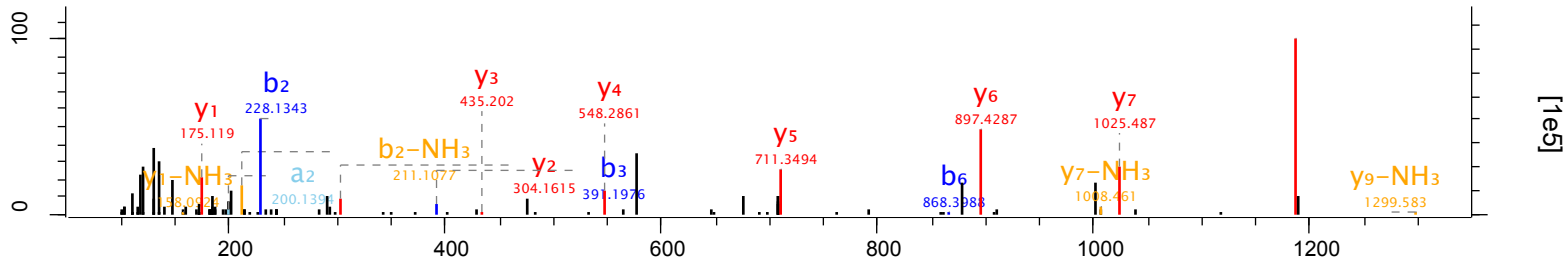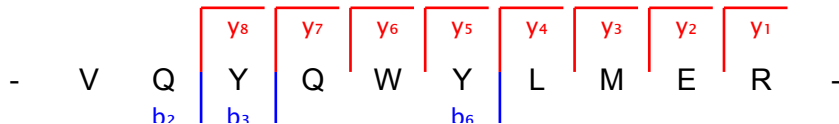

Raw file

Scan

Method

Score

m/z

20120630\_EXQ2\_AtDe\_SA\_WTR\_OG\_pooled\_final\_1\_6

54837

FTMS; HCD

156.17

859.98

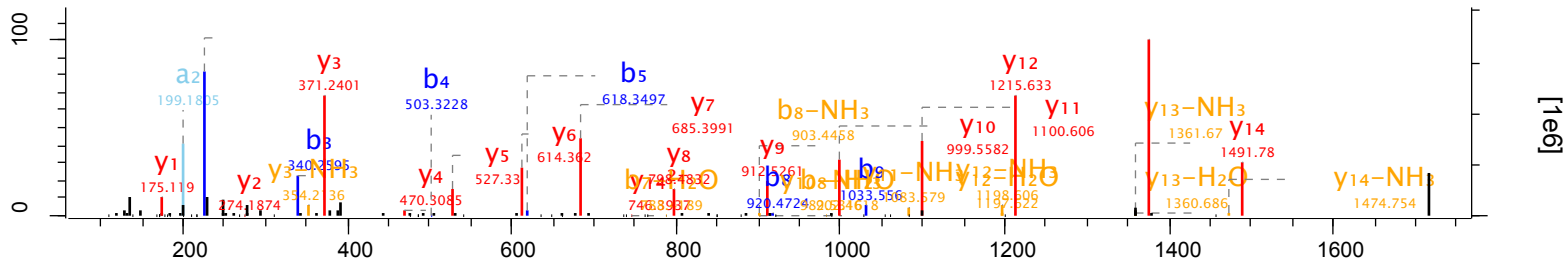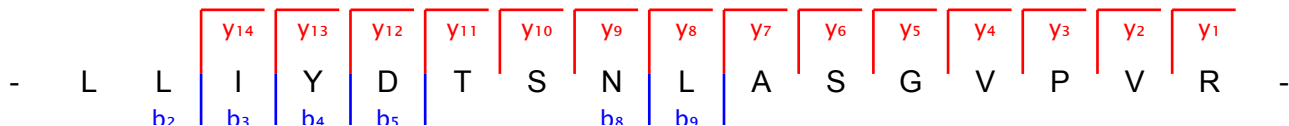

| Raw file                                      | Scan  | Method    | Score | m/z | Gene names |
|-----------------------------------------------|-------|-----------|-------|-----|------------|
| 20120630_EXQ2_AtDe_SA_WTR_OG_pooled_final_1_6 | 57870 | FTMS; HCD | 56.82 | 877 | Lcat       |

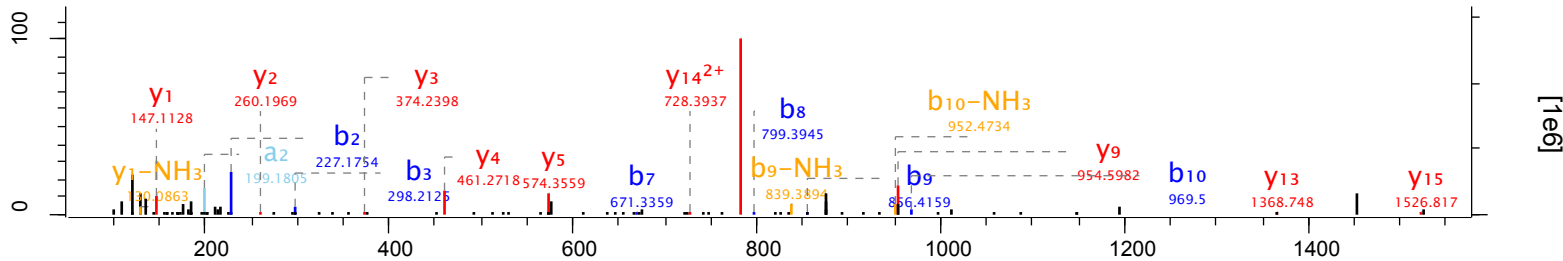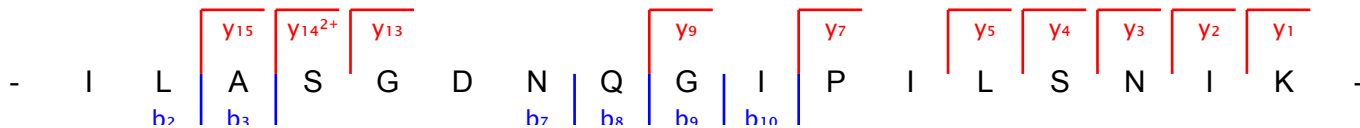

| Raw file                                      | Scan  | Method    | Score  | m/z    | Gene names |
|-----------------------------------------------|-------|-----------|--------|--------|------------|
| 20120630_EXQ2_AtDe_SA_WTR_OG_pooled_final_1_6 | 58061 | FTMS; HCD | 115.57 | 710.05 | Hp         |

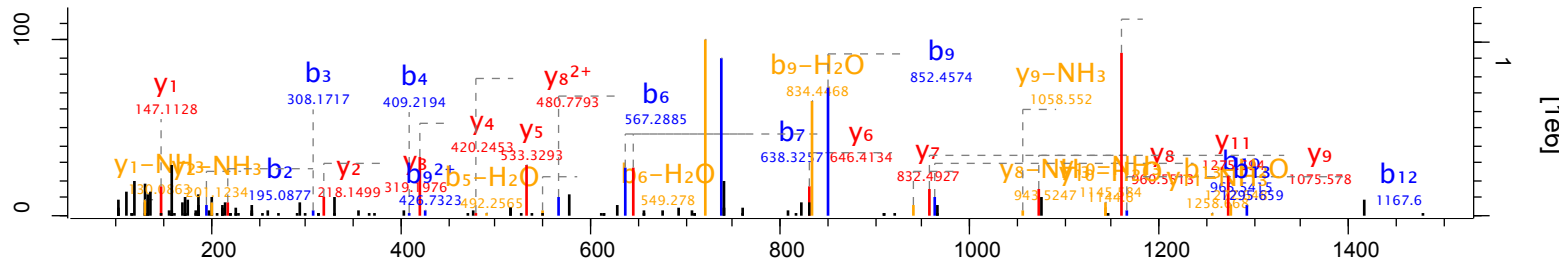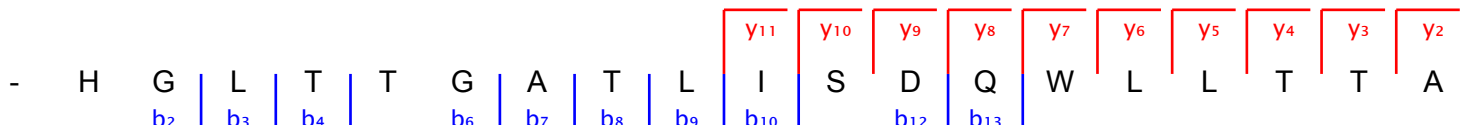

| Raw file                                      | Scan  | Method    | Score  | m/z     | Gene name |
|-----------------------------------------------|-------|-----------|--------|---------|-----------|
| 20120630_EXQ2_AtDe_SA_WTR_OG_pooled_final_1_6 | 61762 | FTMS; HCD | 146.13 | 1037.55 | Mpv1712   |

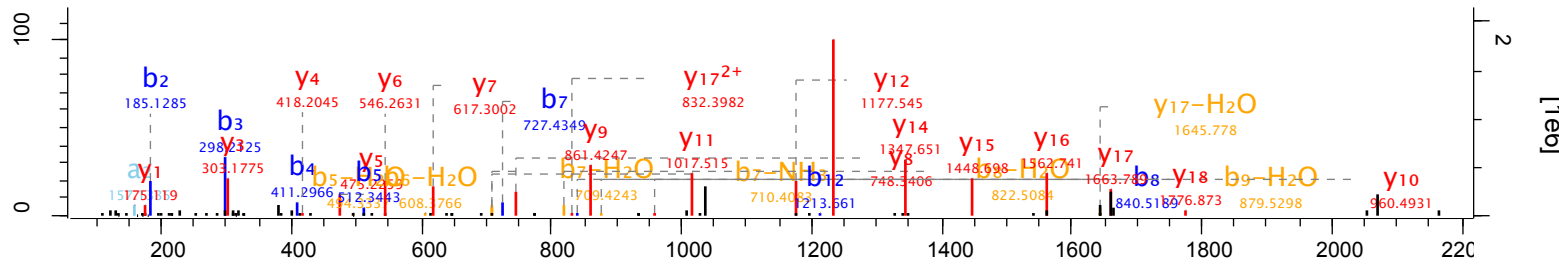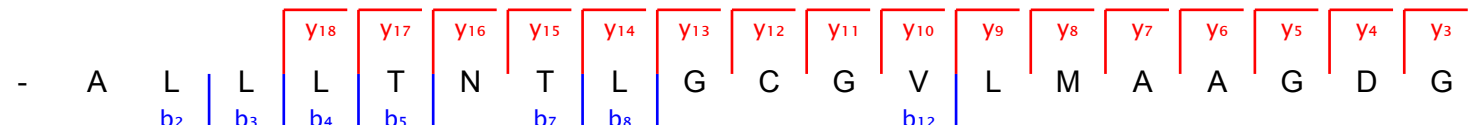

Raw file

20120630\_EXQ2\_AtDe\_SA\_WTR\_OG\_pooled\_final\_1\_6

Scan

62070

Method

FTMS; HCD

Score

111.95

m/z

552.81

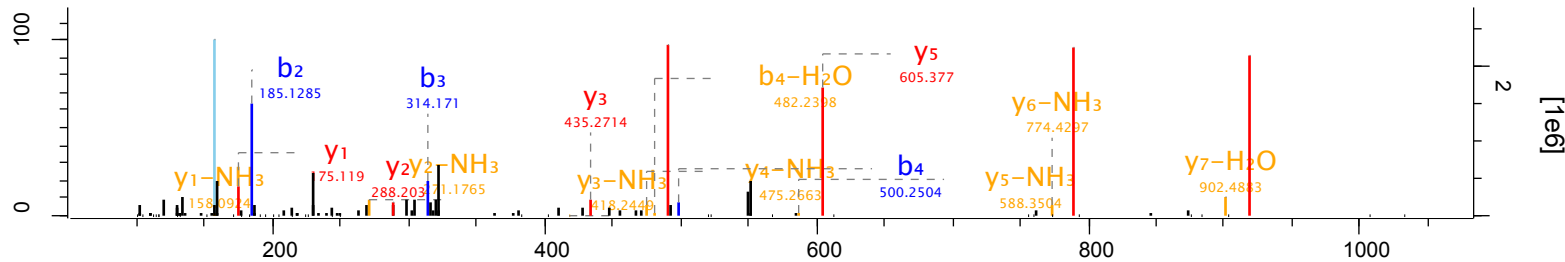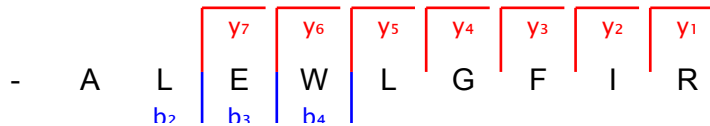



| Raw file                                      | Scan  | Method    | Score  | m/z   | Gene names |
|-----------------------------------------------|-------|-----------|--------|-------|------------|
| 20120630_EXQ2_AtDe_SA_WTR_OG_pooled_final_1_6 | 63219 | FTMS; HCD | 139.31 | 715.9 | Uqcr11     |

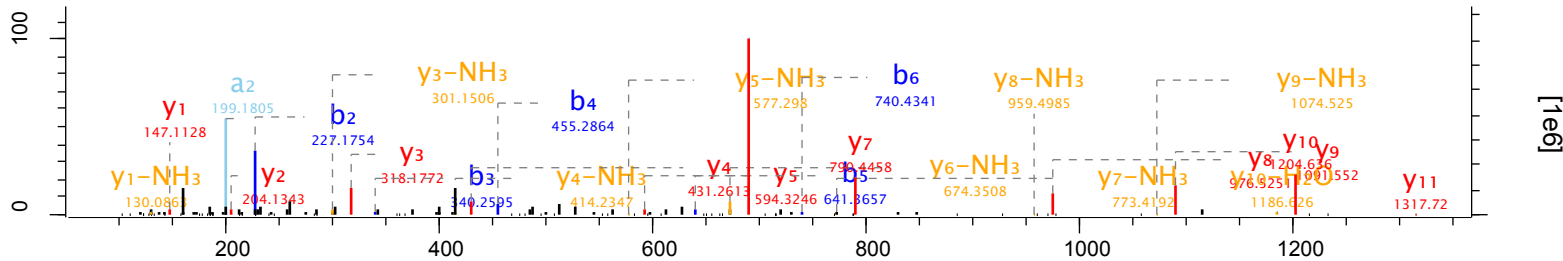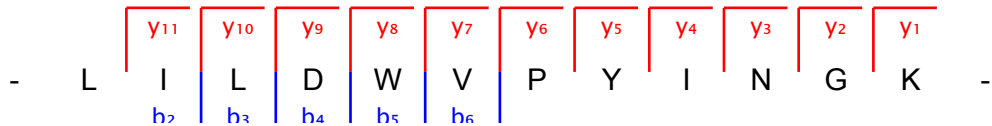

| Raw file                                      | Scan  | Method    | Score | m/z    | Gene names  |
|-----------------------------------------------|-------|-----------|-------|--------|-------------|
| 20120630_EXQ2_AtDe_SA_WTR_OG_pooled_final_1_7 | 10736 | FTMS; HCD | 66.39 | 532.27 | mt-Co3;Mtco |

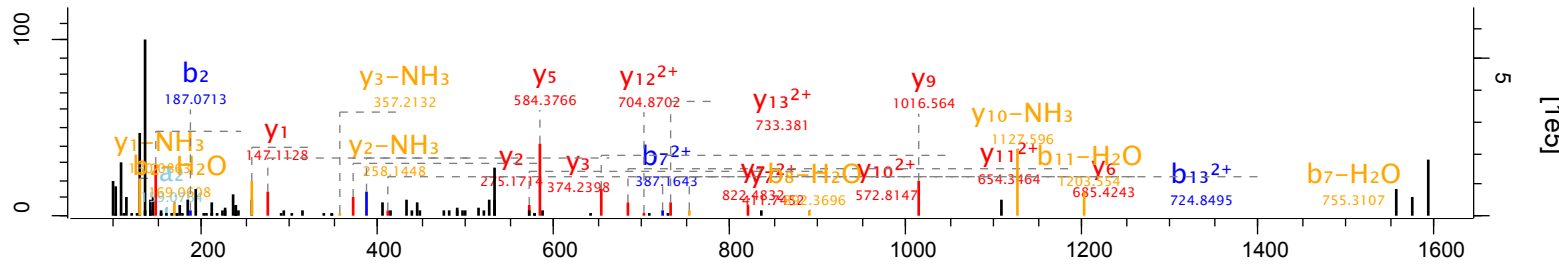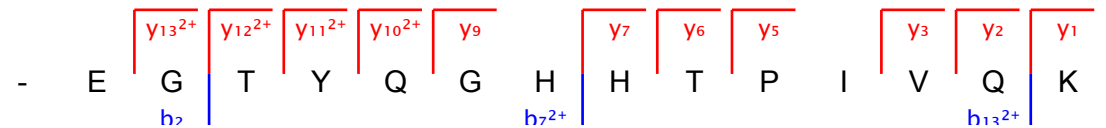

| Raw file                                      | Scan  | Method    | Score | m/z    | Gene names  |
|-----------------------------------------------|-------|-----------|-------|--------|-------------|
| 20120630_EXQ2_AtDe_SA_WTR_OG_pooled_final_1_7 | 10754 | FTMS; HCD | 59.29 | 399.71 | mt-Co3;Mtco |

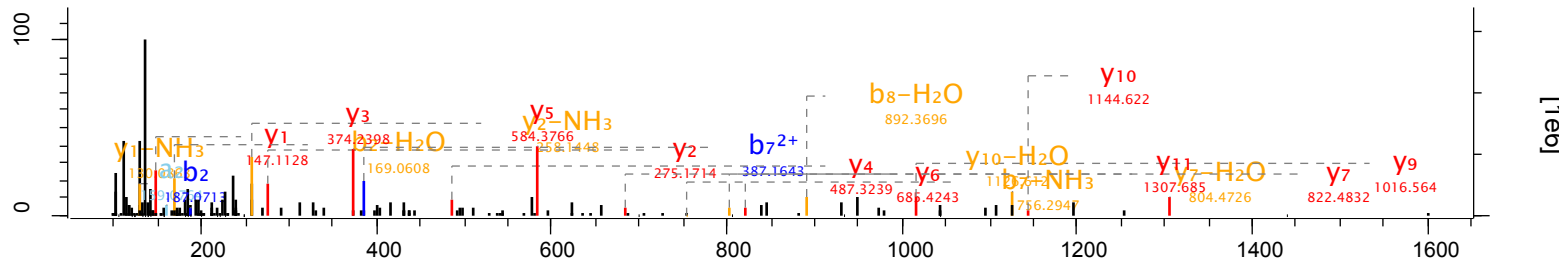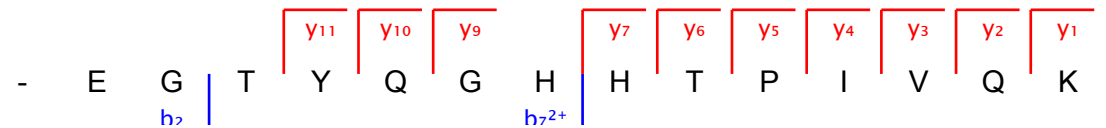

[1e6]

| Raw file                                      | Scan  | Method    | Score | m/z    | Gene names |
|-----------------------------------------------|-------|-----------|-------|--------|------------|
| 20120630_EXQ2_AtDe_SA_WTR_OG_pooled_final_1_7 | 13979 | FTMS; HCD | 72.9  | 618.92 | Nr4a1      |

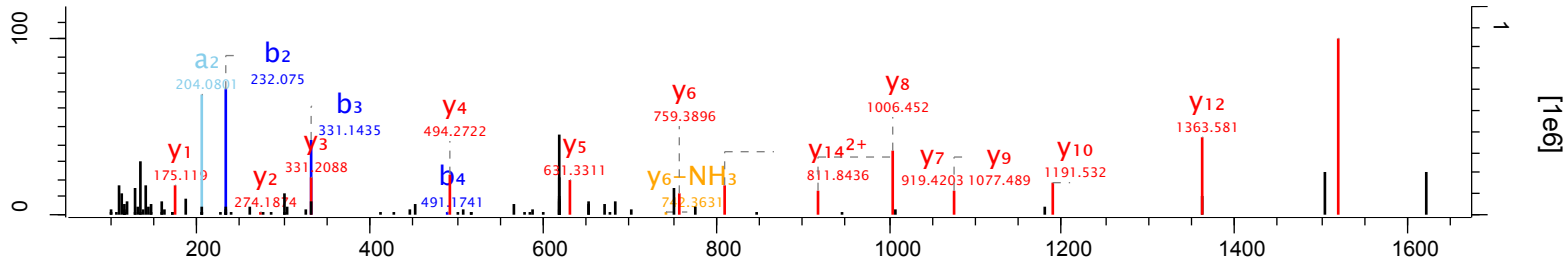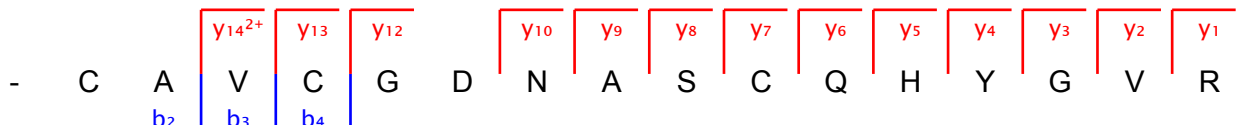

| Raw file                                      | Scan  | Method    | Score  | m/z    | Gene names |
|-----------------------------------------------|-------|-----------|--------|--------|------------|
| 20120630_EXQ2_AtDe_SA_WTR_OG_pooled_final_1_7 | 18426 | FTMS; HCD | 144.66 | 386.88 | Tspan7     |

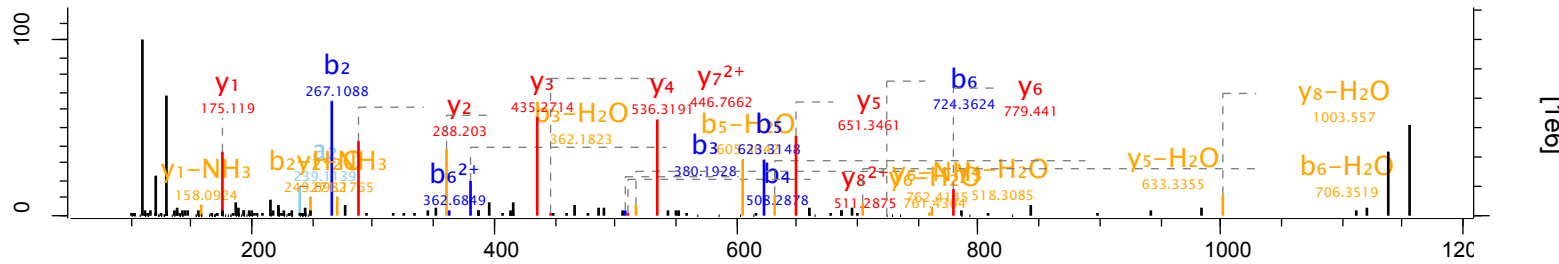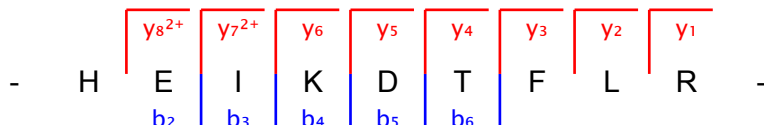

| Raw file                                      | Scan  | Method    | Score | m/z    | Gene names |
|-----------------------------------------------|-------|-----------|-------|--------|------------|
| 20120630_EXQ2_AtDe_SA_WTR_OG_pooled_final_1_7 | 21410 | FTMS; HCD | 68.53 | 398.56 | Apoa2      |

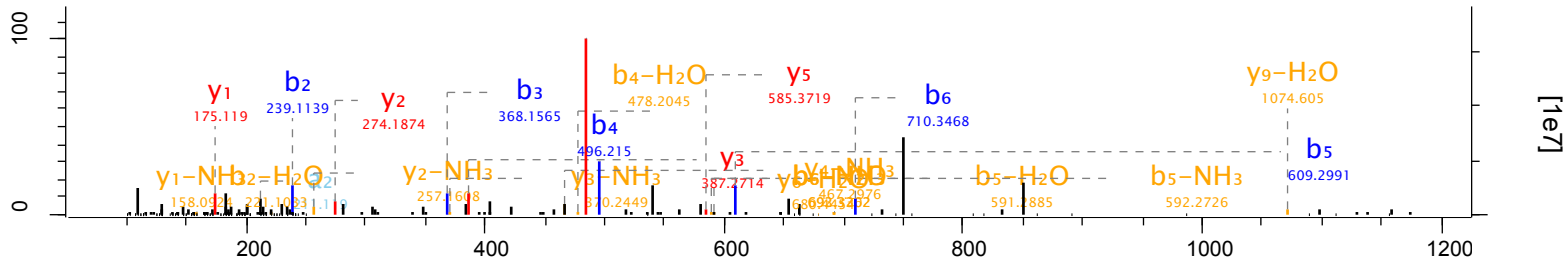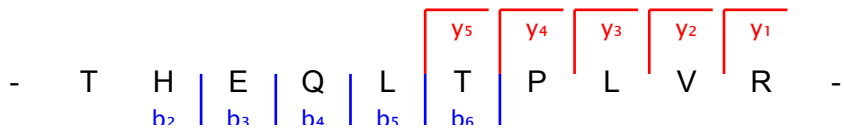

| Raw file                                      | Scan  | Method    | Score  | m/z    | Gene names |
|-----------------------------------------------|-------|-----------|--------|--------|------------|
| 20120630_EXQ2_AtDe_SA_WTR_OG_pooled_final_1_7 | 21421 | FTMS; HCD | 135.99 | 597.34 | Apoa2      |

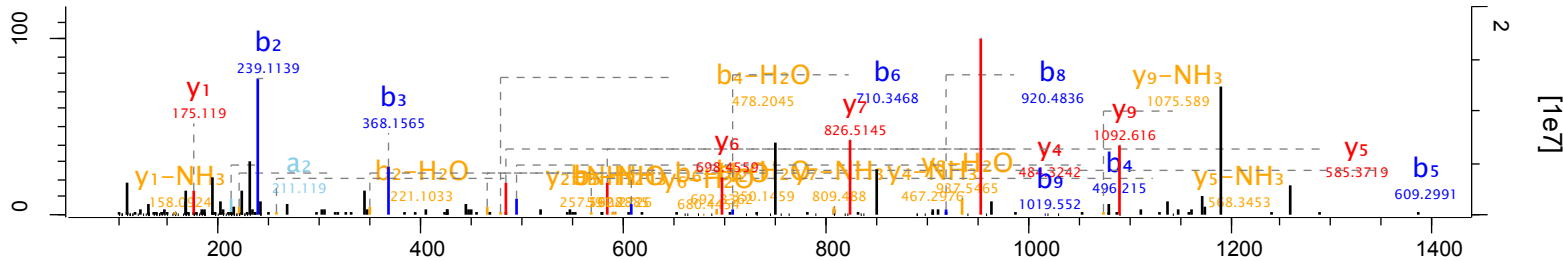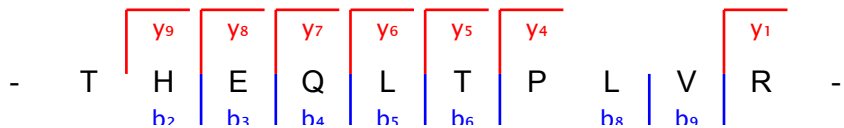

| Raw file                                      | Scan  | Method    | Score  | m/z    | Gene names |
|-----------------------------------------------|-------|-----------|--------|--------|------------|
| 20120630_EXQ2_AtDe_SA_WTR_OG_pooled_final_1_7 | 28690 | FTMS; HCD | 179.93 | 705.33 | Vkorc1     |

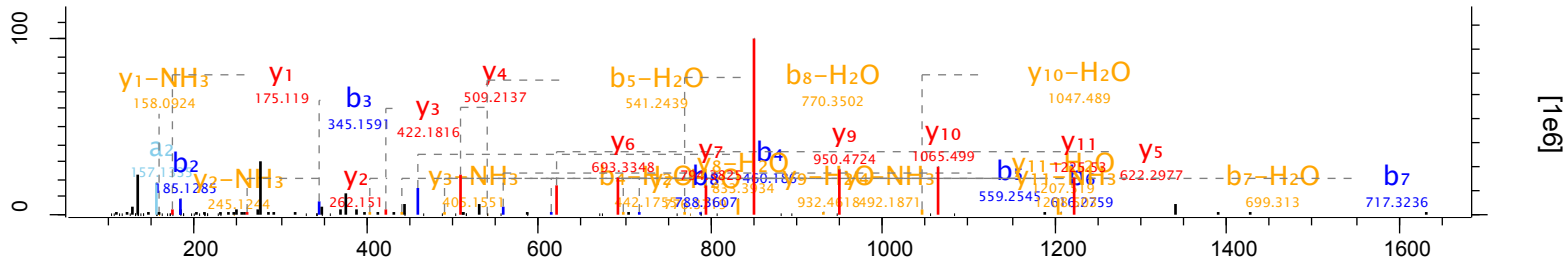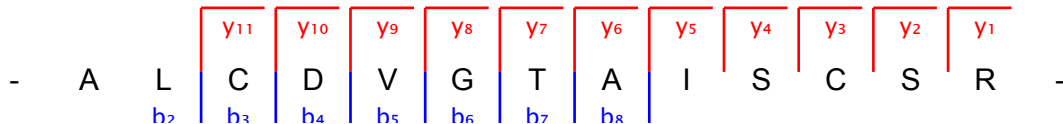



| Raw file                                      | Scan  | Method    | Score | m/z    | Gene names |
|-----------------------------------------------|-------|-----------|-------|--------|------------|
| 20120630_EXQ2_AtDe_SA_WTR_OG_pooled_final_1_7 | 30775 | FTMS; HCD | 60.44 | 476.24 | Mapk15     |

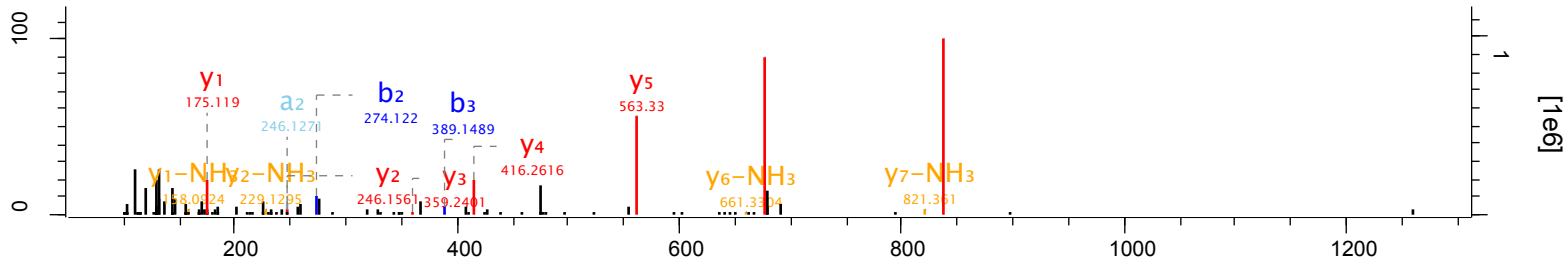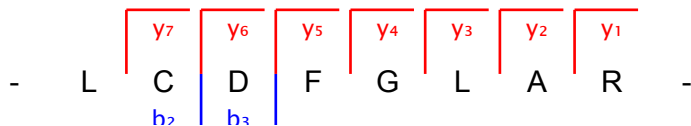

| Raw file                                      | Scan  | Method    | Score | m/z    | Gene names |
|-----------------------------------------------|-------|-----------|-------|--------|------------|
| 20120630_EXQ2_AtDe_SA_WTR_OG_pooled_final_1_7 | 31217 | FTMS; HCD | 63.29 | 762.37 | Mbl2       |

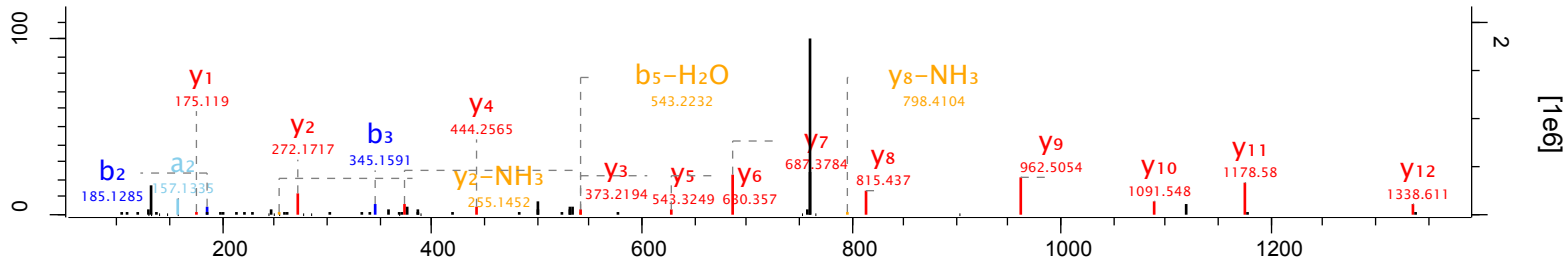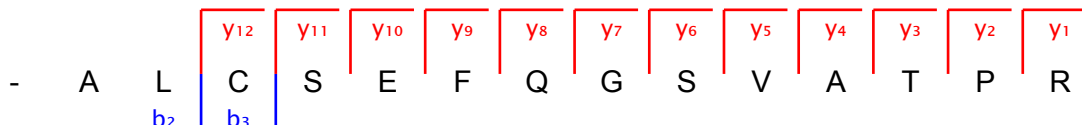

Raw file

20120630\_EXQ2\_AtDe\_SA\_WTR\_OG\_pooled\_final\_1\_7

Scan

31864

Method

FTMS; HCD

Score

51.07

m/z

749.92

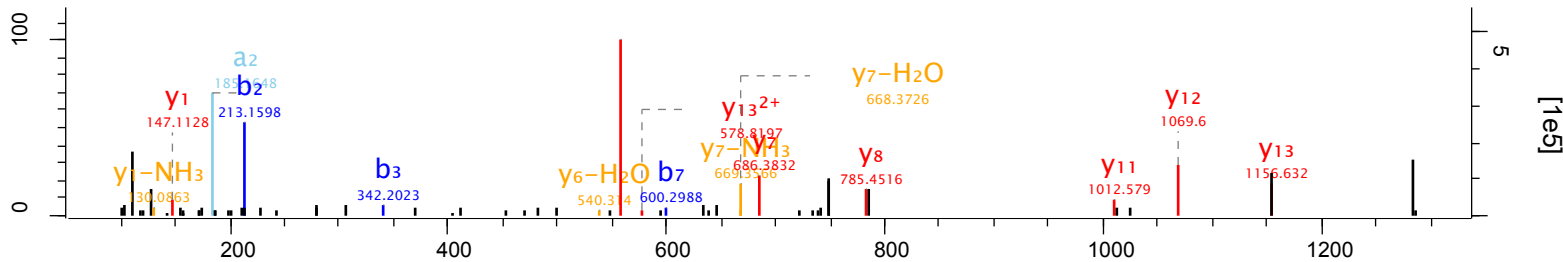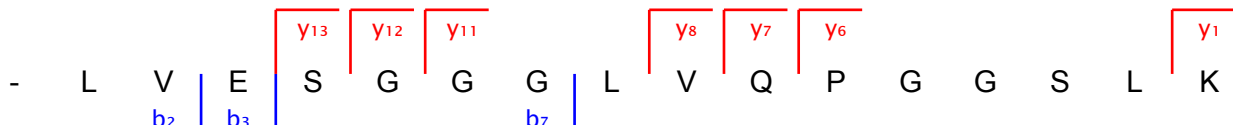

Raw file

20120630\_EXQ2\_AtDe\_SA\_WTR\_OG\_pooled\_final\_1\_7

Scan

36548

Method

FTMS; HCD

Score

79.49

m/z

618.68

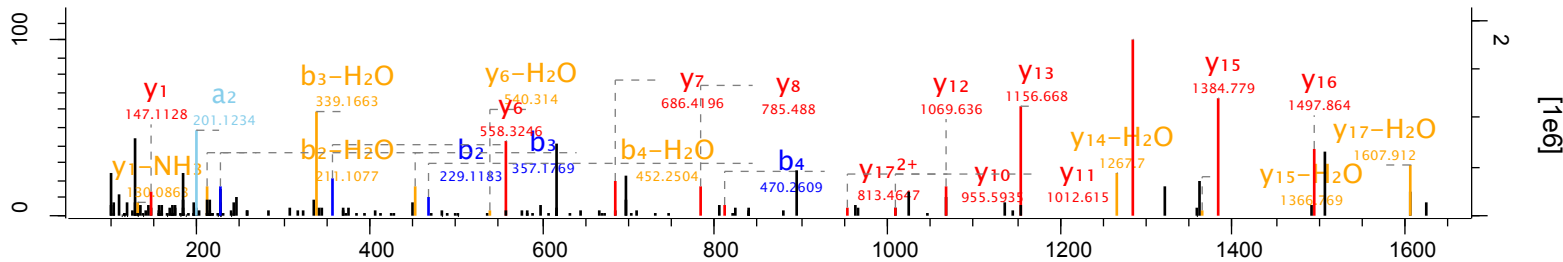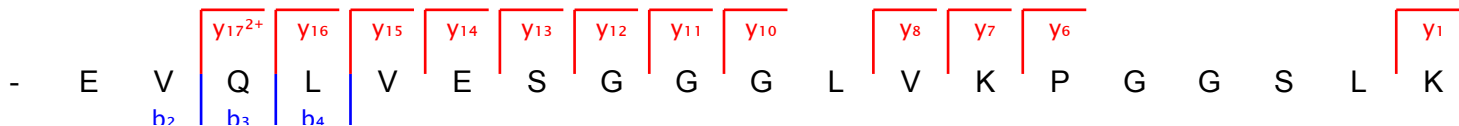

| Raw file                                      | Scan  | Method    | Score | m/z    | Gene names |
|-----------------------------------------------|-------|-----------|-------|--------|------------|
| 20120630_EXQ2_AtDe_SA_WTR_OG_pooled_final_1_7 | 43180 | FTMS; HCD | 59.57 | 593.79 | Msrb1      |

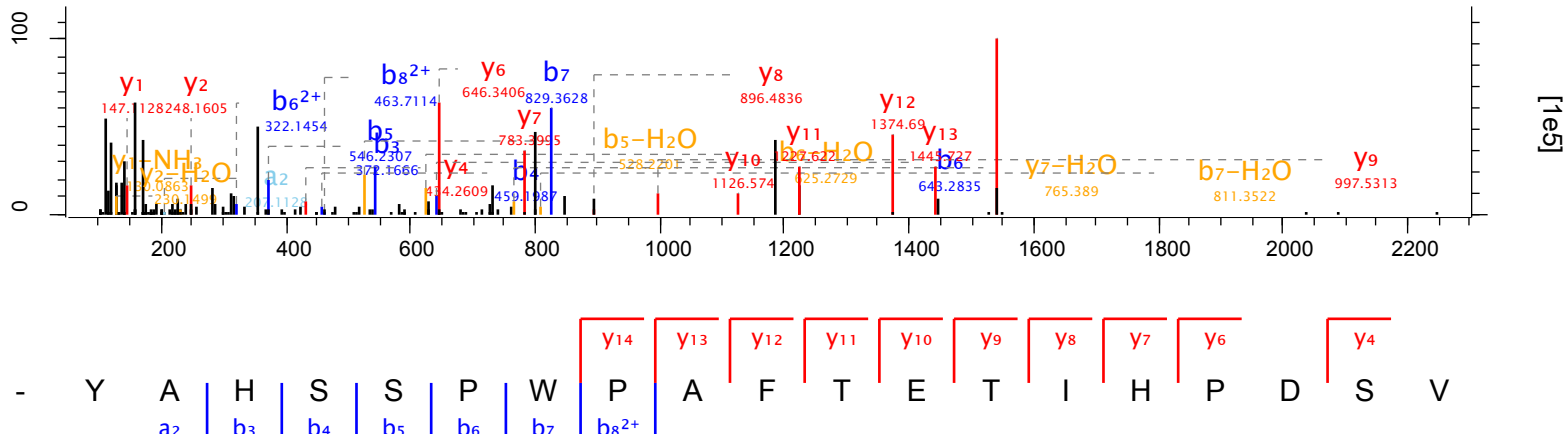

Raw file

20120630\_EXQ2\_AtDe\_SA\_WTR\_OG\_pooled\_final\_1\_7

Scan

45514

Method

FTMS; HCD

Score

20.3

m/z

818.09

Gene names

Rnf130

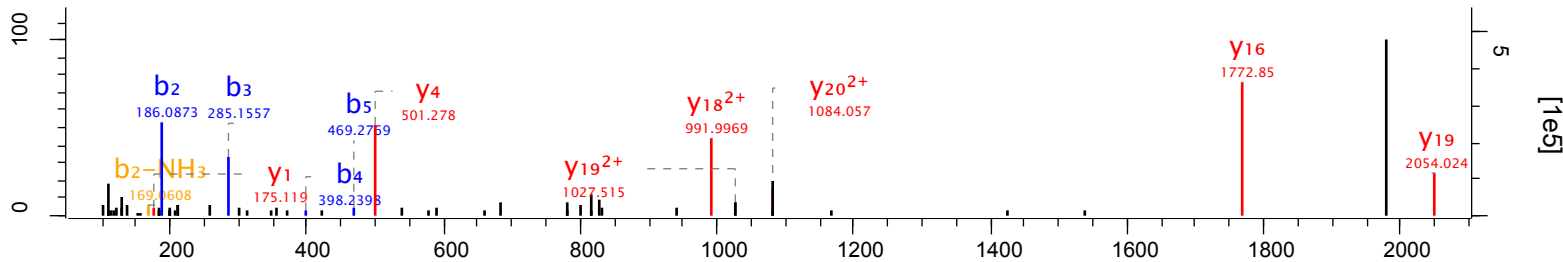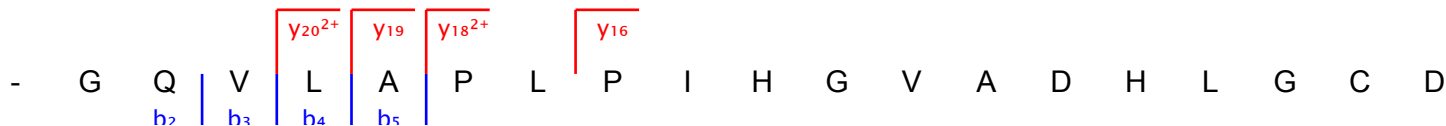

| Raw file                                      | Scan  | Method    | Score | m/z    | Gene names |
|-----------------------------------------------|-------|-----------|-------|--------|------------|
| 20120630_EXQ2_AtDe_SA_WTR_OG_pooled_final_1_7 | 49044 | FTMS; HCD | 143.5 | 708.34 | Ndufa1     |

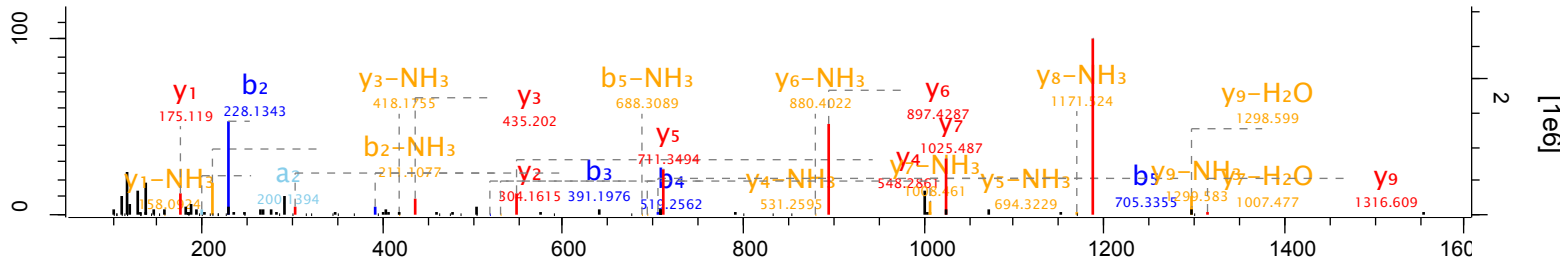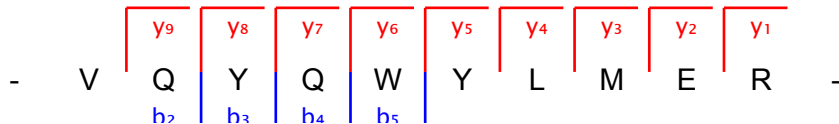

| Raw file                                      | Scan  | Method    | Score | m/z    | Gene names |
|-----------------------------------------------|-------|-----------|-------|--------|------------|
| 20120630_EXQ2_AtDe_SA_WTR_OG_pooled_final_1_7 | 54027 | FTMS; HCD | 83.99 | 692.13 | Selh       |

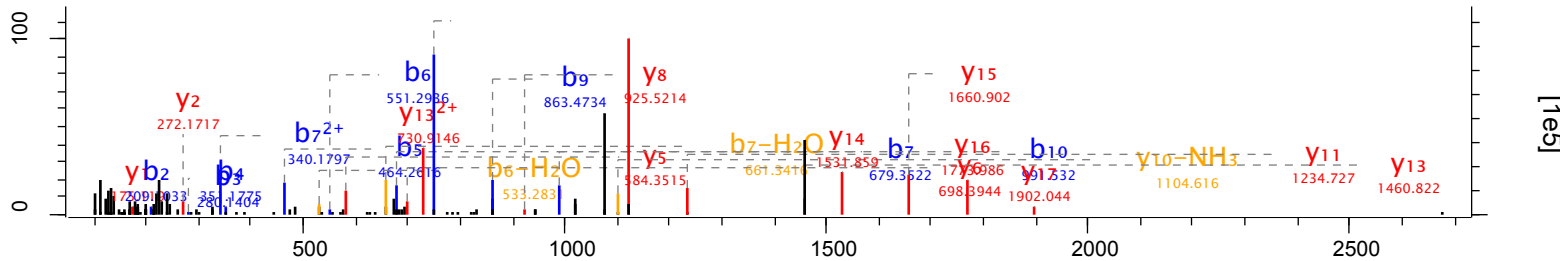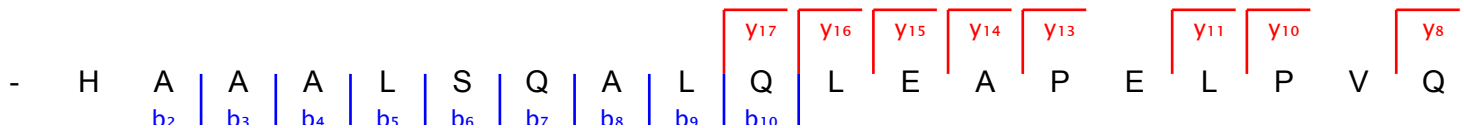



Raw file

Scan

Method

Score

m/z

20120630\_EXQ2\_AtDe\_SA\_WTR\_OG\_pooled\_final\_1\_7

63658

FTMS; HCD

68.02

552.82

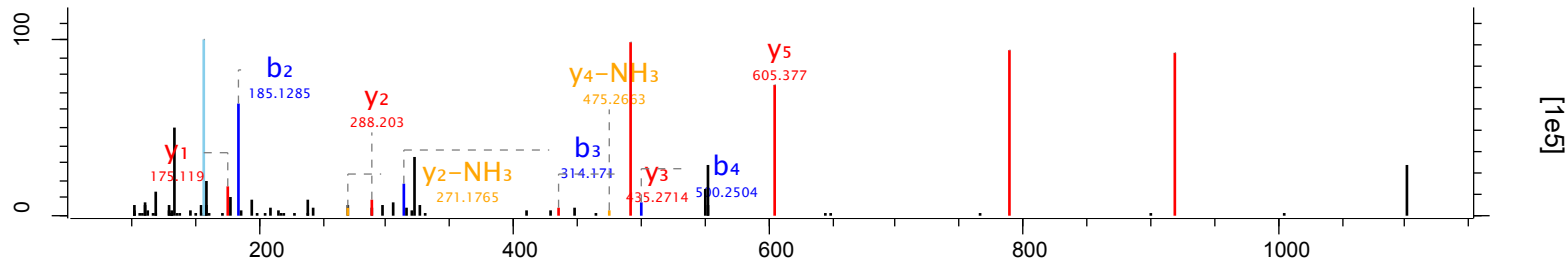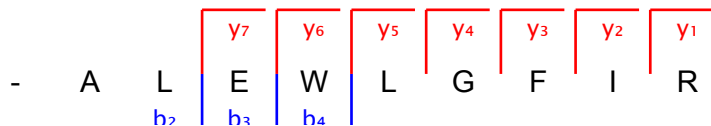

| Raw file                                      | Scan  | Method    | Score | m/z    | Gene names  |
|-----------------------------------------------|-------|-----------|-------|--------|-------------|
| 20120630_EXQ2_AtDe_SA_WTR_OG_pooled_final_1_8 | 10190 | FTMS; HCD | 82.07 | 399.46 | mt-Co3;Mtco |

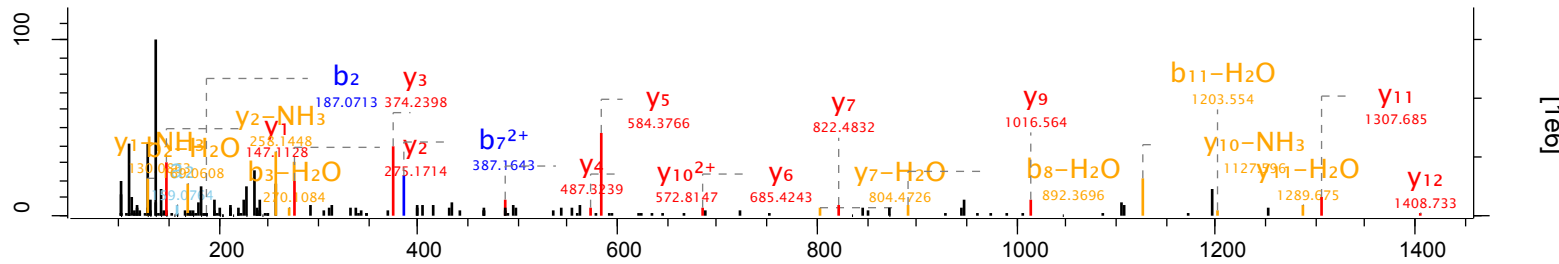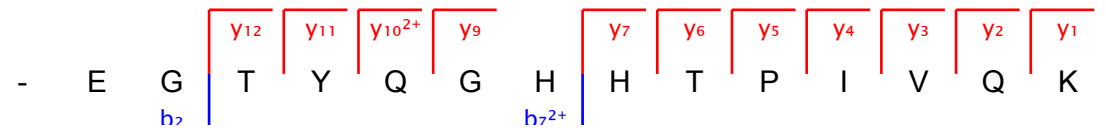

[1e6]

Raw file

Scan

Method

Score

m/z

20120630\_EXQ2\_AtDe\_SA\_WTR\_OG\_pooled\_final\_1\_8

14176

FTMS; HCD

95.09

430.9

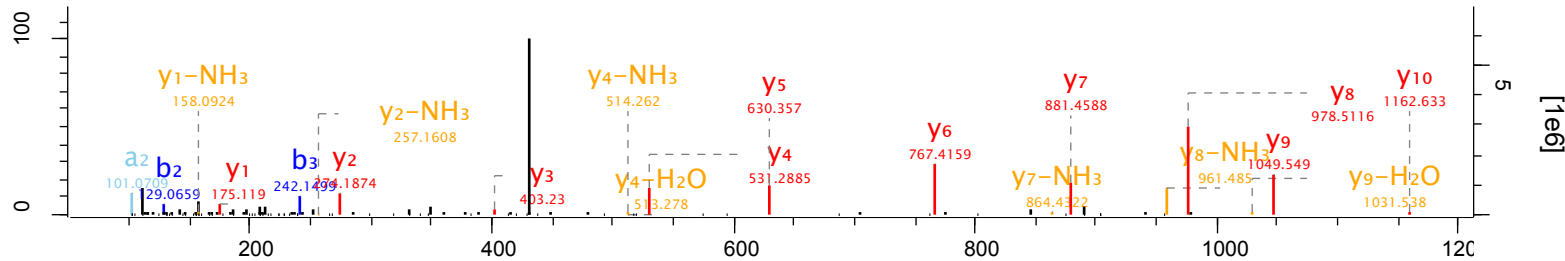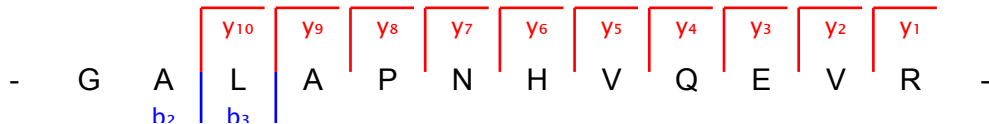

Raw file

Scan

Method

Score

m/z

20120630\_EXQ2\_AtDe\_SA\_WTR\_OG\_pooled\_final\_1\_8

14224

FTMS; HCD

63.09

645.85

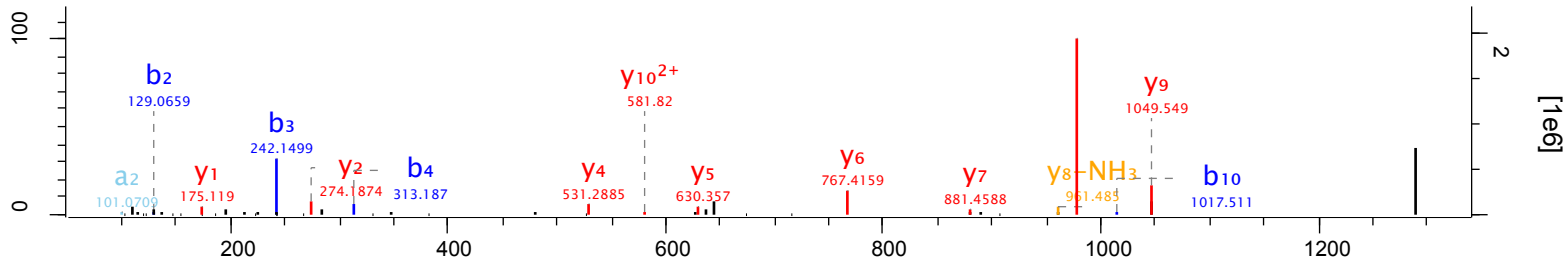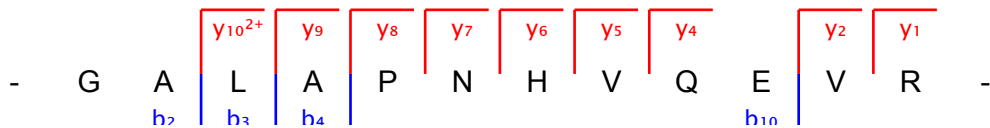

| Raw file                                      | Scan  | Method    | Score  | m/z    | Gene names |
|-----------------------------------------------|-------|-----------|--------|--------|------------|
| 20120630_EXQ2_AtDe_SA_WTR_OG_pooled_final_1_8 | 17362 | FTMS; HCD | 136.33 | 550.96 | Gjc3       |

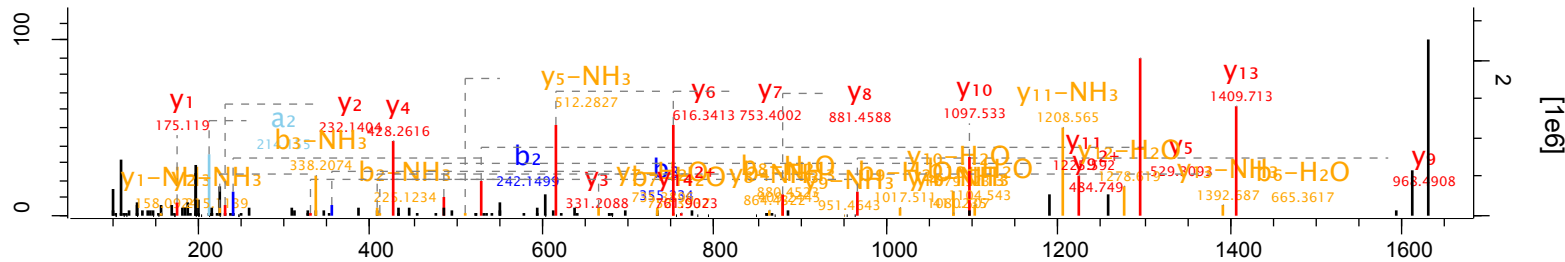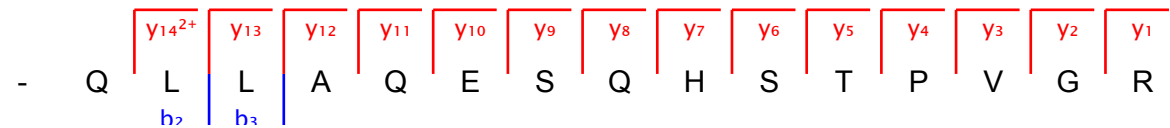

| Raw file                                      | Scan  | Method    | Score | m/z    | Gene names      |
|-----------------------------------------------|-------|-----------|-------|--------|-----------------|
| 20120630_EXQ2_AtDe_SA_WTR_OG_pooled_final_1_8 | 31137 | FTMS; HCD | 86.01 | 366.69 | Tmem254;D14Ert4 |

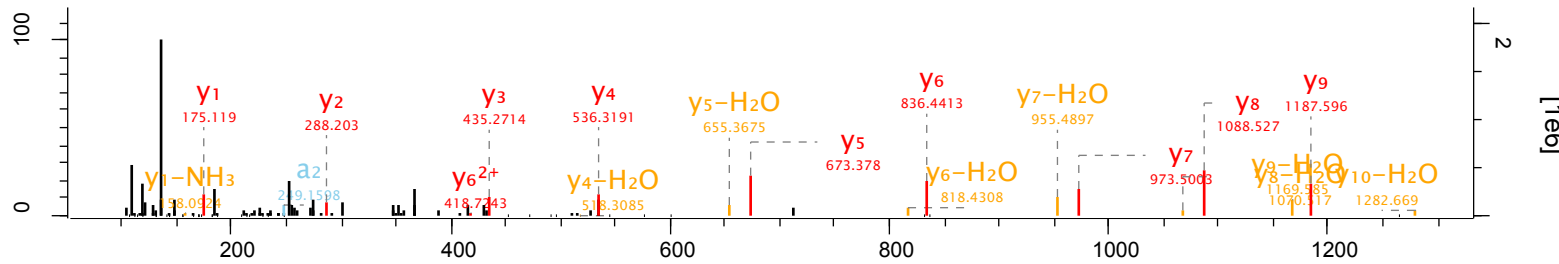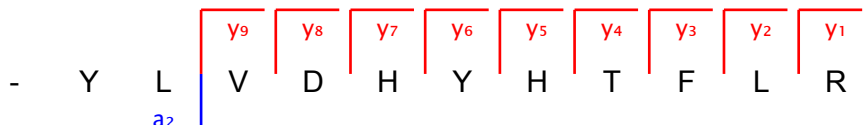

Raw file

20120630\_EXQ2\_AtDe\_SA\_WTR\_OG\_pooled\_final\_1\_8

Scan

34864

Method

FTMS; HCD

Score

38.78

m/z

629.33

Gene names

Gpsm3

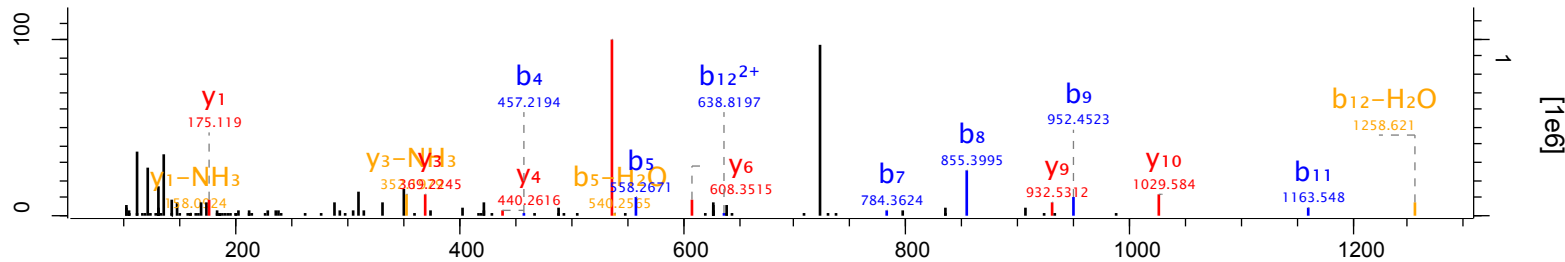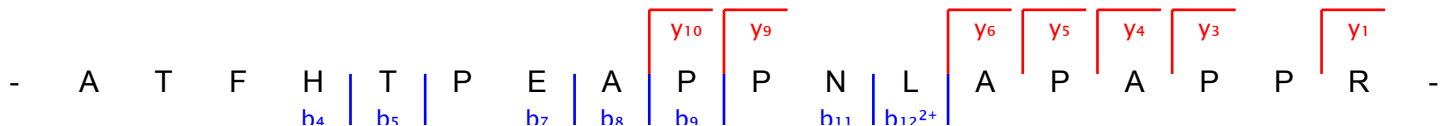

| Raw file                                      | Scan  | Method    | Score | m/z    | Gene names |
|-----------------------------------------------|-------|-----------|-------|--------|------------|
| 20120630_EXQ2_AtDe_SA_WTR_OG_pooled_final_1_8 | 39948 | FTMS; HCD | 76.53 | 613.67 | Scin       |

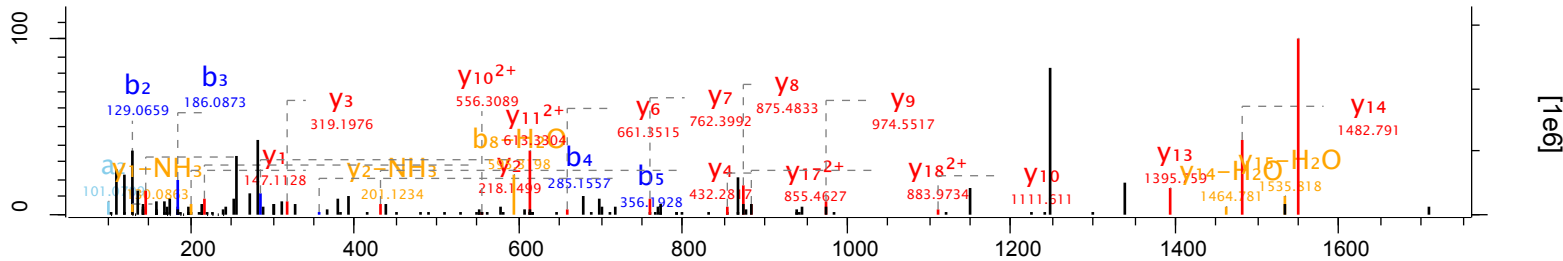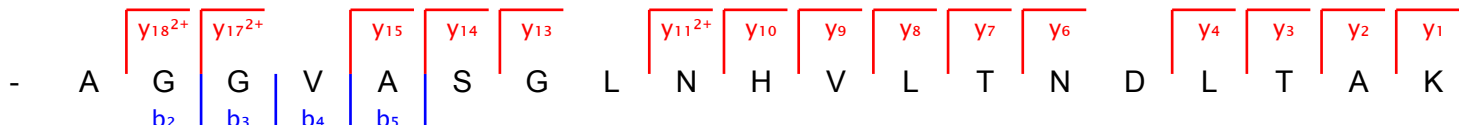



| Raw file                                      | Scan  | Method    | Score | m/z    | Gene names |
|-----------------------------------------------|-------|-----------|-------|--------|------------|
| 20120630_EXQ2_AtDe_SA_WTR_OG_pooled_final_1_8 | 42242 | FTMS; HCD | 57.15 | 587.31 | Fsd1l      |

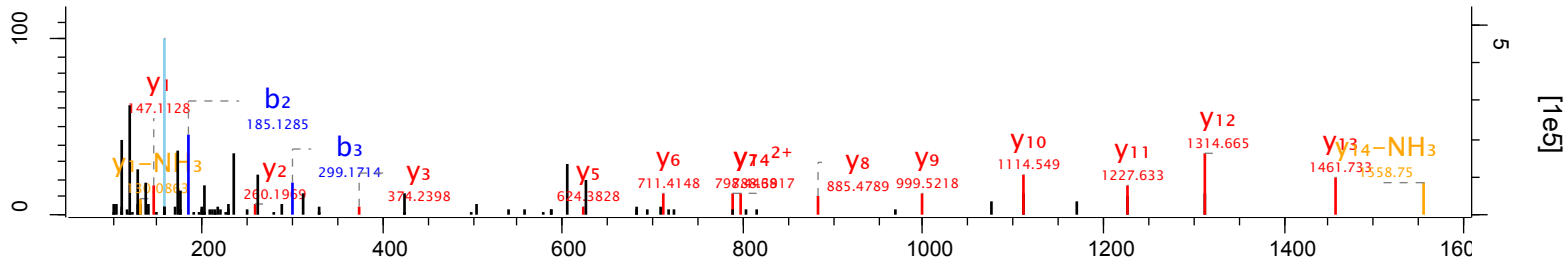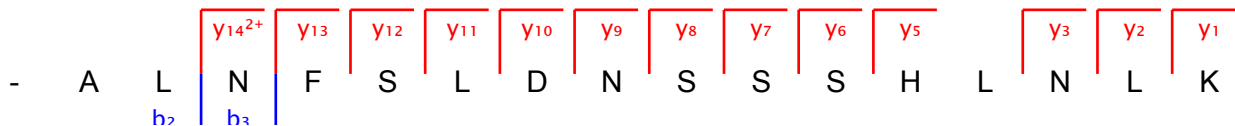

| Raw file                                      | Scan  | Method    | Score | m/z    | Gene names |
|-----------------------------------------------|-------|-----------|-------|--------|------------|
| 20120630_EXQ2_AtDe_SA_WTR_OG_pooled_final_1_8 | 43965 | FTMS; HCD | 68.68 | 496.63 | Dchs1      |

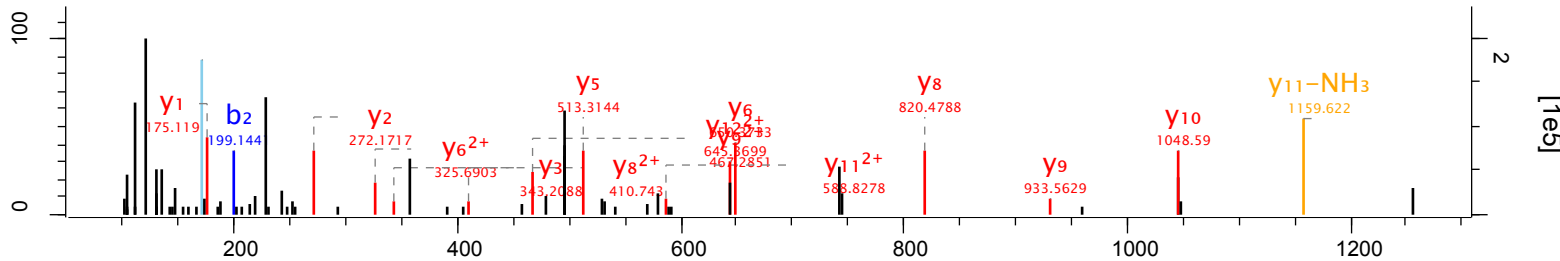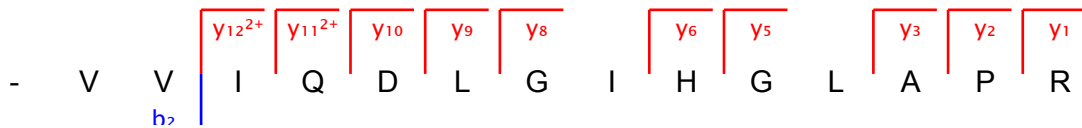

| Raw file                                      | Scan  | Method    | Score  | m/z    | Gene names |
|-----------------------------------------------|-------|-----------|--------|--------|------------|
| 20120630_EXQ2_AtDe_SA_WTR_OG_pooled_final_1_8 | 43973 | FTMS; HCD | 127.58 | 696.03 | Stxbp6     |

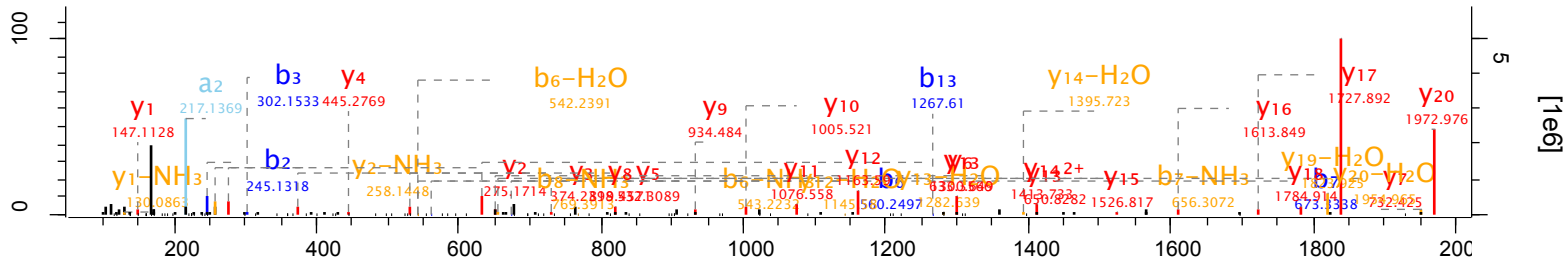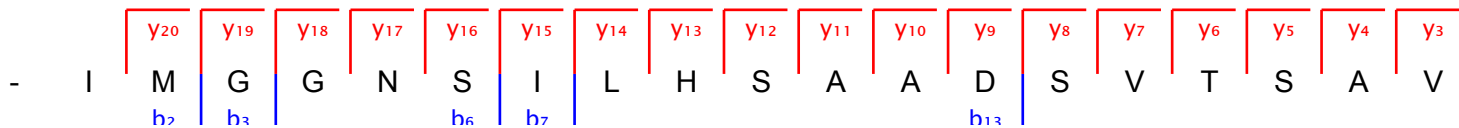

| Raw file                                      | Scan  | Method    | Score | m/z    | Gene names |
|-----------------------------------------------|-------|-----------|-------|--------|------------|
| 20120630_EXQ2_AtDe_SA_WTR_OG_pooled_final_1_8 | 52617 | FTMS; HCD | 102.5 | 561.29 | S100a9     |

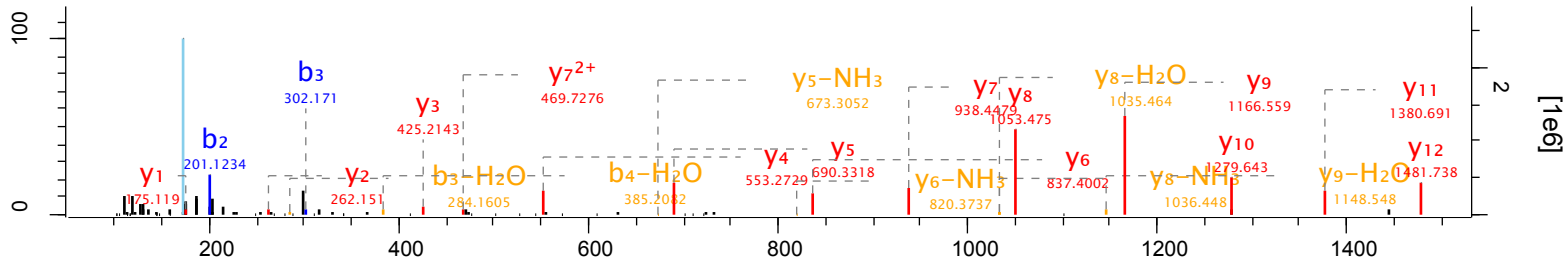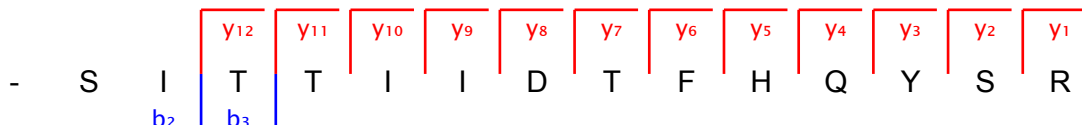

| Raw file                                      | Scan  | Method    | Score | m/z    | Gene names |
|-----------------------------------------------|-------|-----------|-------|--------|------------|
| 20120630_EXQ2_AtDe_SA_WTR_OG_pooled_final_1_8 | 54206 | FTMS; HCD | 50.39 | 750.06 | Galnt16    |

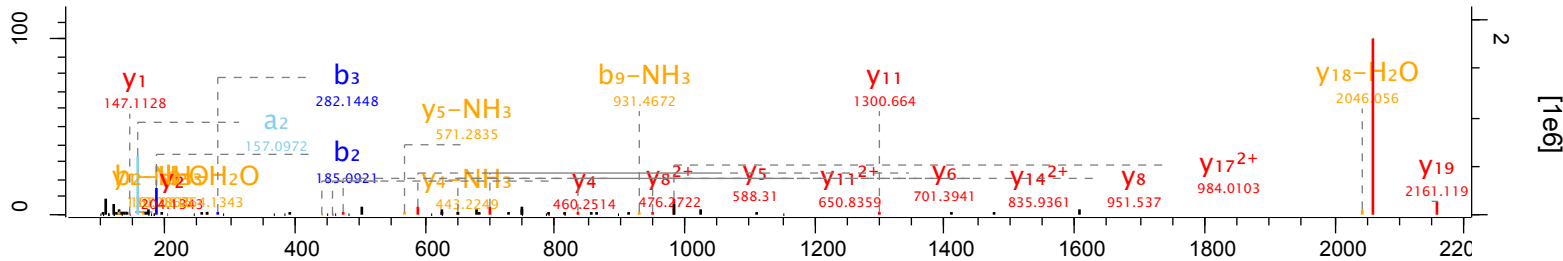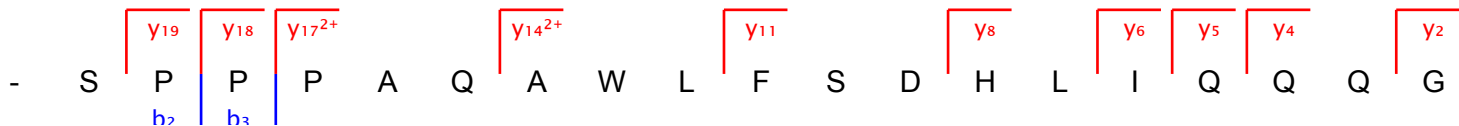

| Raw file                                      | Scan  | Method    | Score | m/z     | Gene name |
|-----------------------------------------------|-------|-----------|-------|---------|-----------|
| 20120630_EXQ2_AtDe_SA_WTR_OG_pooled_final_1_8 | 58057 | FTMS; HCD | 51.07 | 1056.17 | Ear2;Ear3 |

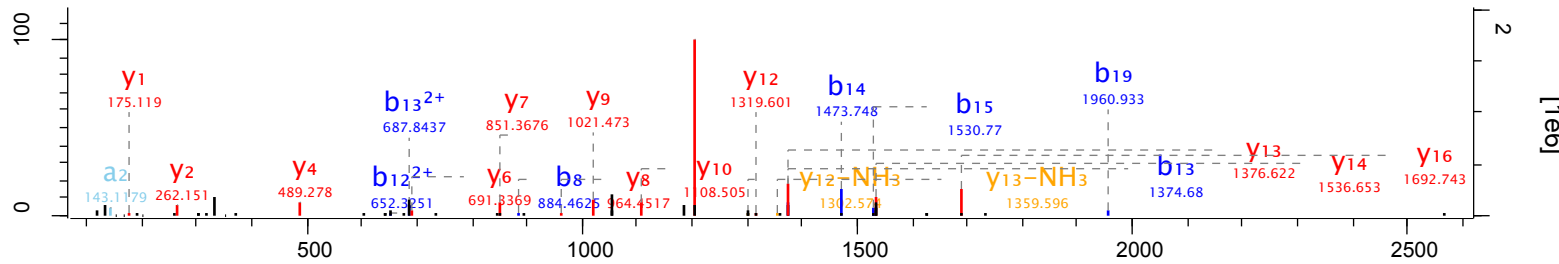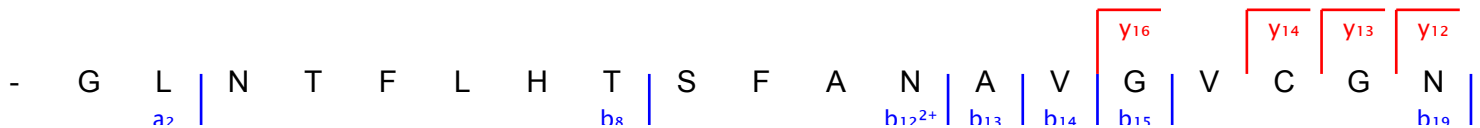

| Raw file                                      | Scan  | Method    | Score | m/z     | Gene name |
|-----------------------------------------------|-------|-----------|-------|---------|-----------|
| 20120630_EXQ2_AtDe_SA_WTR_OG_pooled_final_1_8 | 58078 | FTMS; HCD | 41.6  | 1055.83 | Ear2;Ear3 |

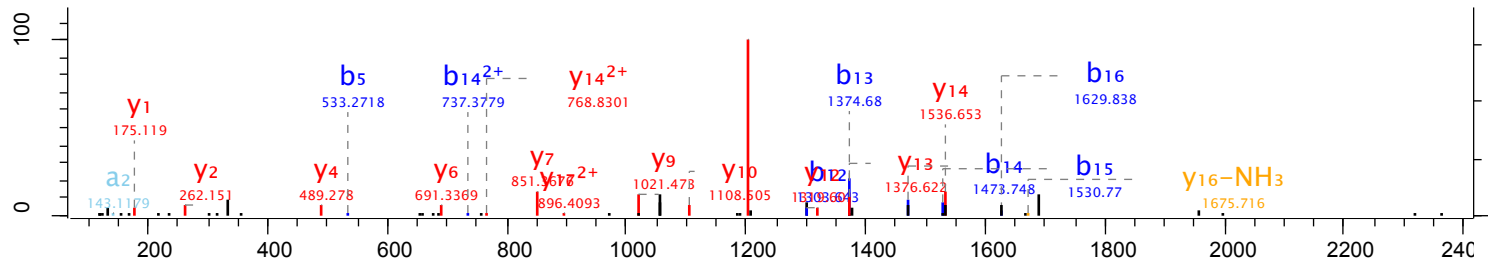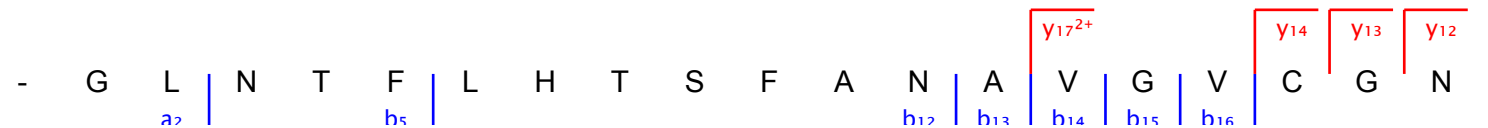

[1e6]

| Raw file                                      | Scan  | Method    | Score | m/z    | Gene names |
|-----------------------------------------------|-------|-----------|-------|--------|------------|
| 20120630_EXQ2_AtDe_SA_WTR_OG_pooled_final_1_8 | 60342 | FTMS; HCD | 88.57 | 744.09 | Adcy4      |

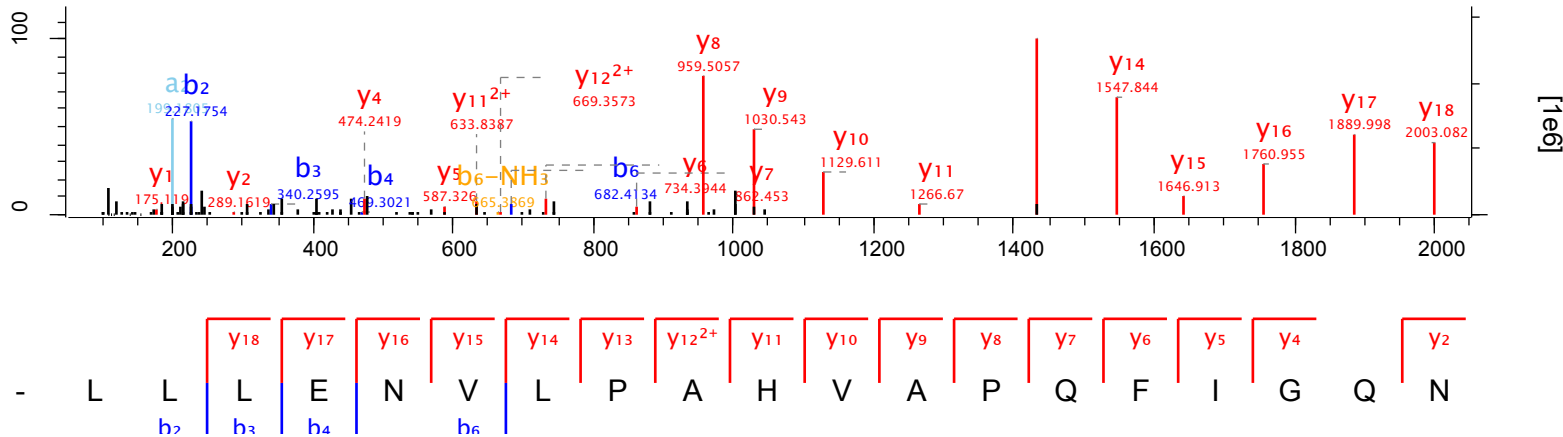



Raw file

20120630\_EXQ2\_AtDe\_SA\_WTR\_OG\_pooled\_final\_1\_8

Scan

65825

Method

FTMS; HCD

Score

33.84

m/z

565.02

Gene names

Smim11

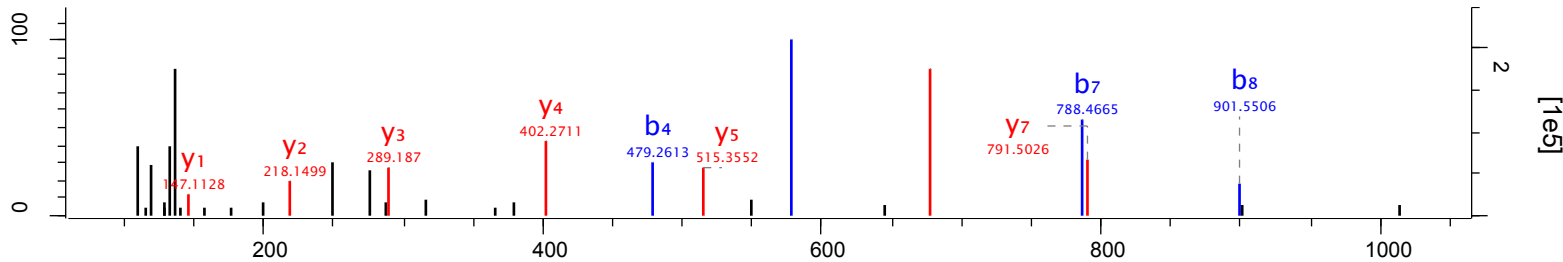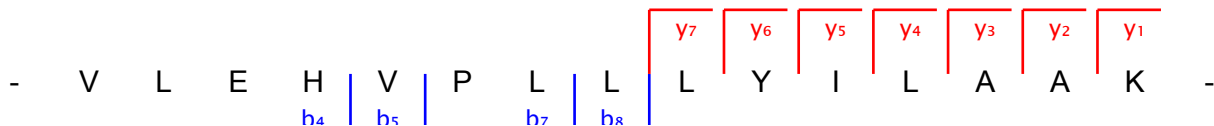

| Raw file                                      | Scan  | Method    | Score | m/z    | Gene names |
|-----------------------------------------------|-------|-----------|-------|--------|------------|
| 20120630_EXQ2_AtDe_SA_WTR_OG_pooled_final_1_9 | 11611 | FTMS; HCD | 65.81 | 415.47 | Map2       |

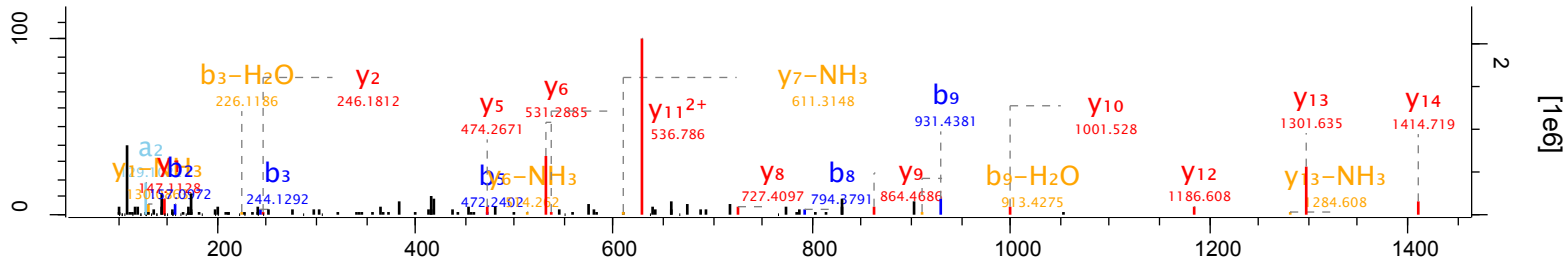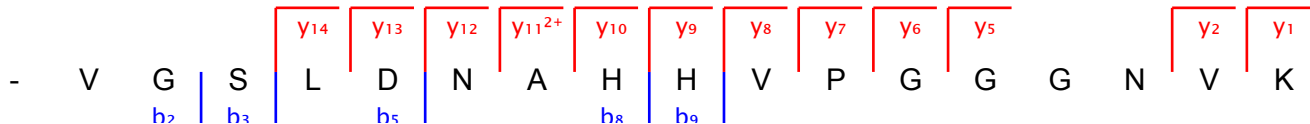

Raw file

Scan

Method

Score

m/z

20120630\_EXQ2\_AtDe\_SA\_WTR\_OG\_pooled\_final\_1\_9

13252

FTMS; HCD

61.11

430.9

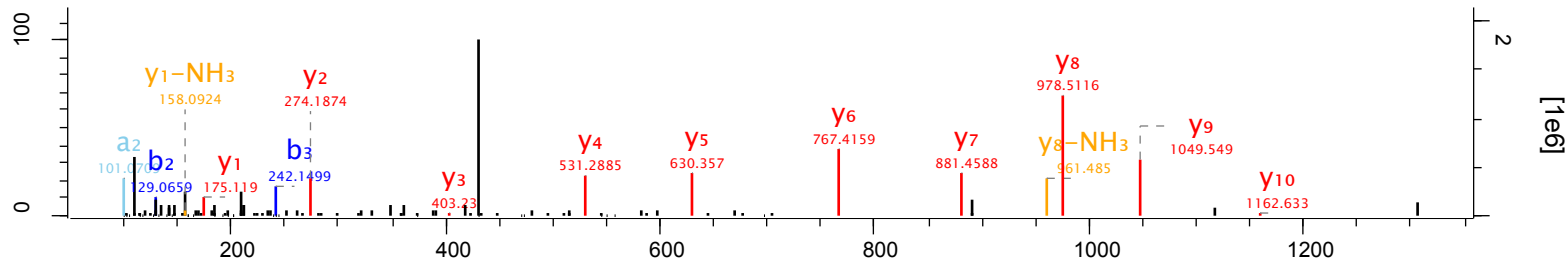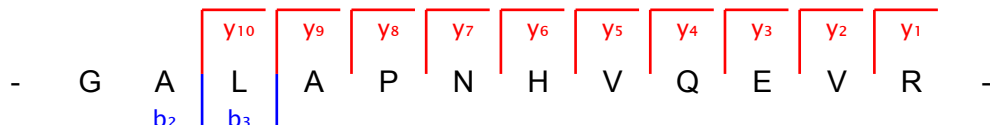

| Raw file                                      | Scan  | Method    | Score | m/z    | Gene names |
|-----------------------------------------------|-------|-----------|-------|--------|------------|
| 20120630_EXQ2_AtDe_SA_WTR_OG_pooled_final_1_9 | 24082 | FTMS; HCD | 76.77 | 354.83 | Apoc3      |

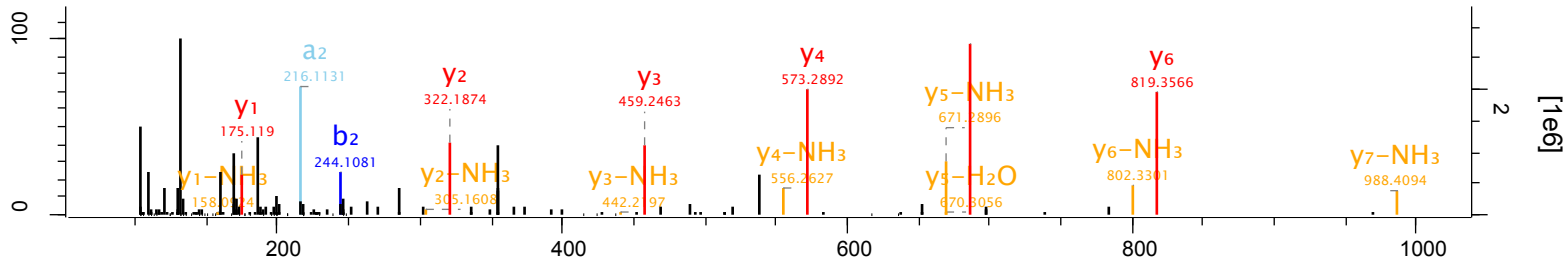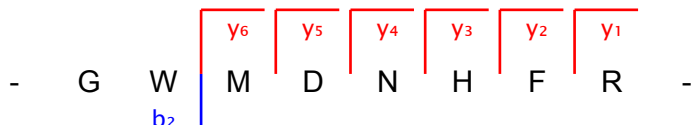

Raw file

20120630\_EXQ2\_AtDe\_SA\_WTR\_OG\_pooled\_final\_1\_9

Scan

24101

Method

FTMS; HCD

Score

103.74

m/z

531.74

Gene names

Apoc3

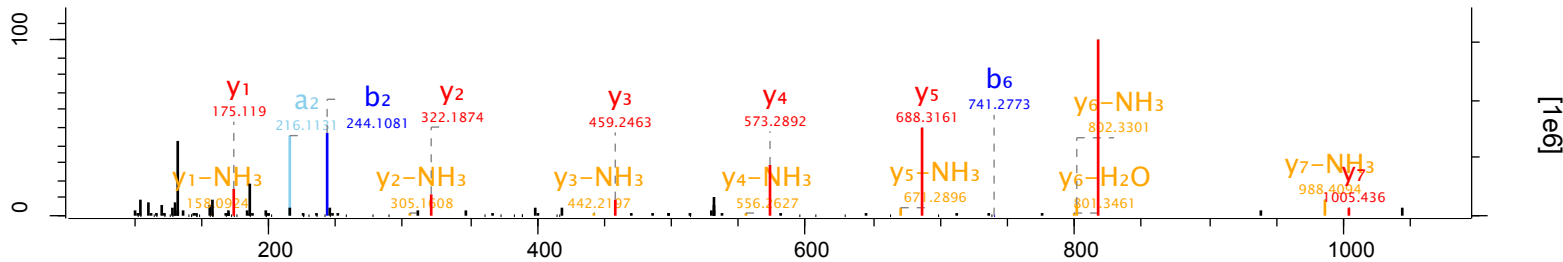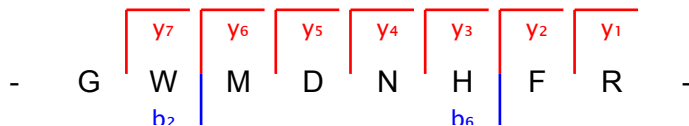

| Raw file                                      | Scan  | Method    | Score | m/z    | Gene names |
|-----------------------------------------------|-------|-----------|-------|--------|------------|
| 20120630_EXQ2_AtDe_SA_WTR_OG_pooled_final_1_9 | 24815 | FTMS; HCD | 55.44 | 570.02 | Zdhhc24    |

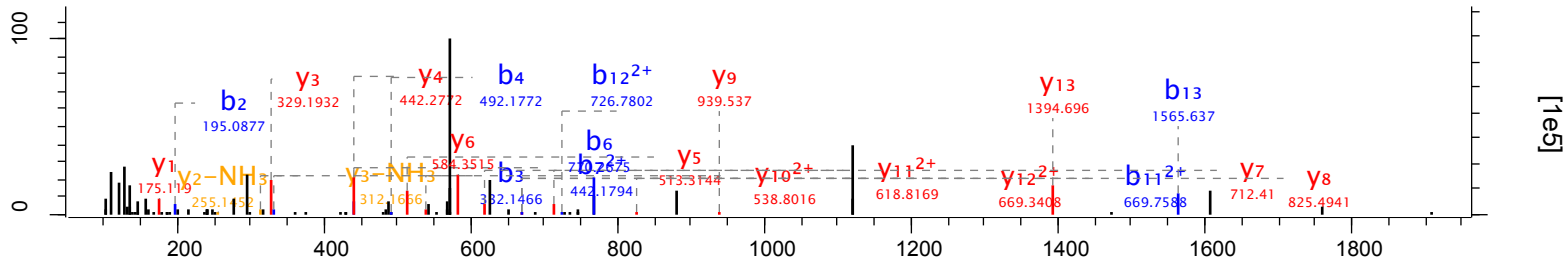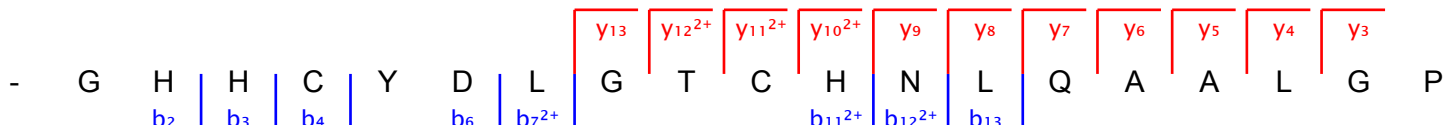

| Raw file                                      | Scan  | Method    | Score | m/z    | Gene names |
|-----------------------------------------------|-------|-----------|-------|--------|------------|
| 20120630_EXQ2_AtDe_SA_WTR_OG_pooled_final_1_9 | 25726 | FTMS; HCD | 37.69 | 625.98 | Ripk3      |

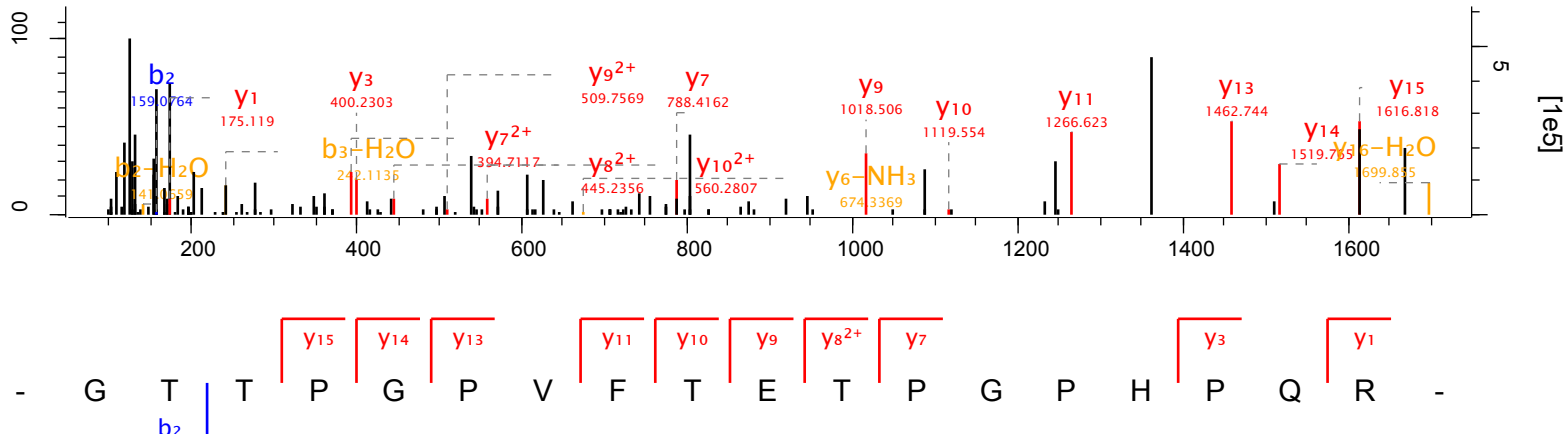

Raw file

20120630\_EXQ2\_AtDe\_SA\_WTR\_OG\_pooled\_final\_1\_9

Scan

60050

Method

FTMS; HCD

Score

39.68

m/z

609.33

Gene names

Pyurf

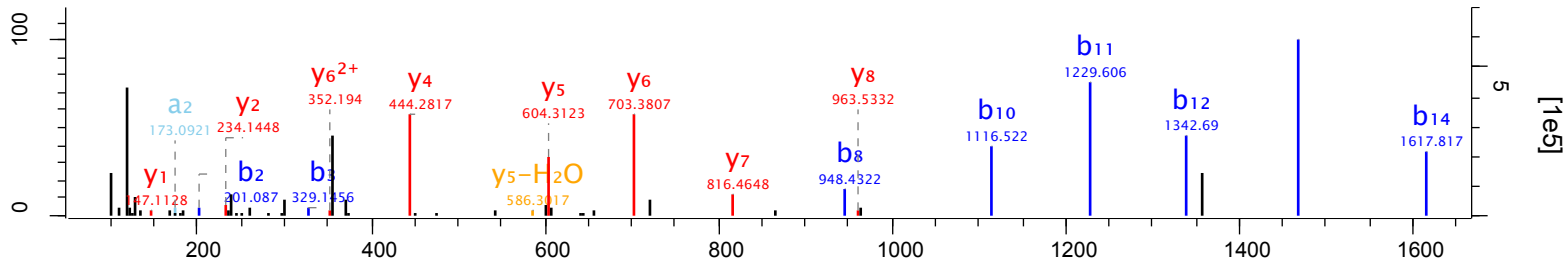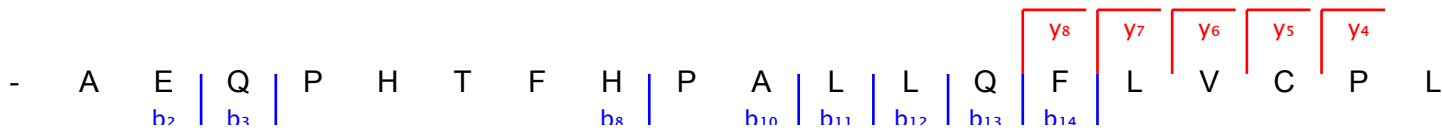



| Raw file                                      | Scan  | Method    | Score | m/z   | Gene names |
|-----------------------------------------------|-------|-----------|-------|-------|------------|
| 20120630_EXQ2_AtDe_SA_WTR_OG_pooled_final_1_9 | 60069 | FTMS; HCD | 73.67 | 812.1 | Pyurf      |

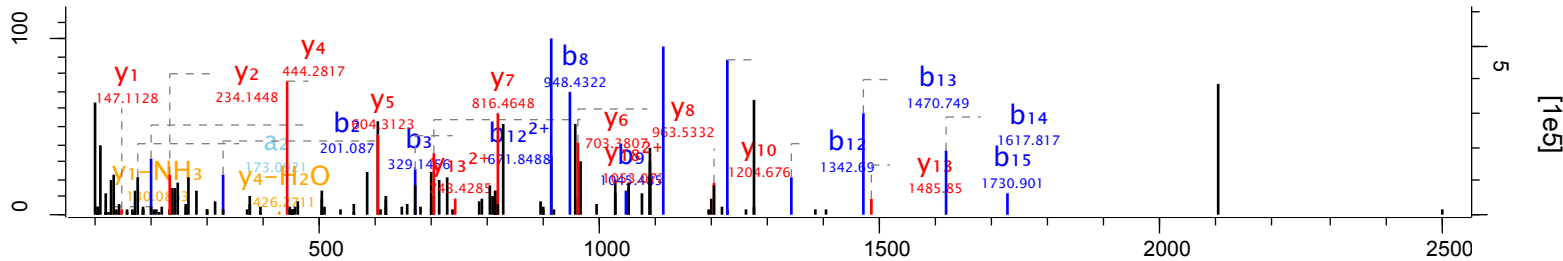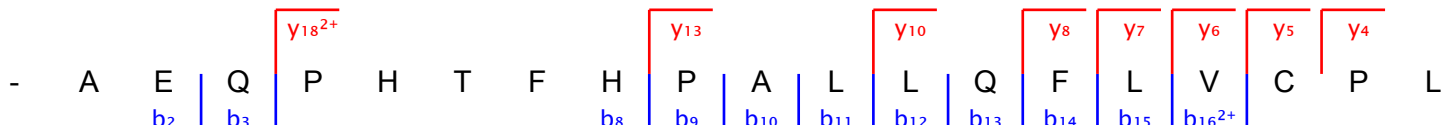

| Raw file                                      | Scan | Method    | Score  | m/z    | Gene names   |
|-----------------------------------------------|------|-----------|--------|--------|--------------|
| 20120630_EXQ2_AtDe_SA_WTR_OG_pooled_final_1_9 | 9076 | FTMS; HCD | 106.32 | 399.45 | mt-Co3;Mtco3 |

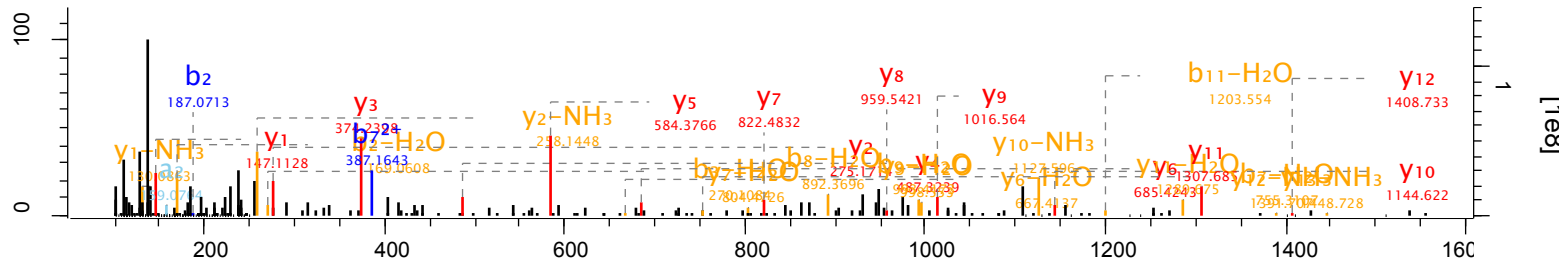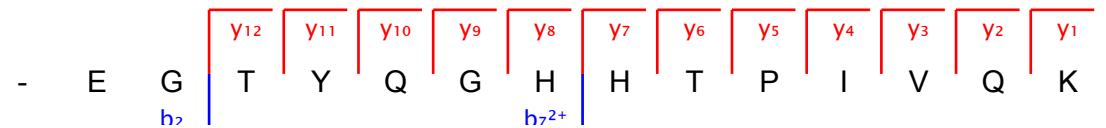

| Raw file                                      | Scan  | Method    | Score | m/z    | Gene names |
|-----------------------------------------------|-------|-----------|-------|--------|------------|
| 20120706_EXQ2_AtDe_SA_WTR_OG_pooled_final_1_5 | 13701 | FTMS; HCD | 58.92 | 542.77 | Rgs13      |

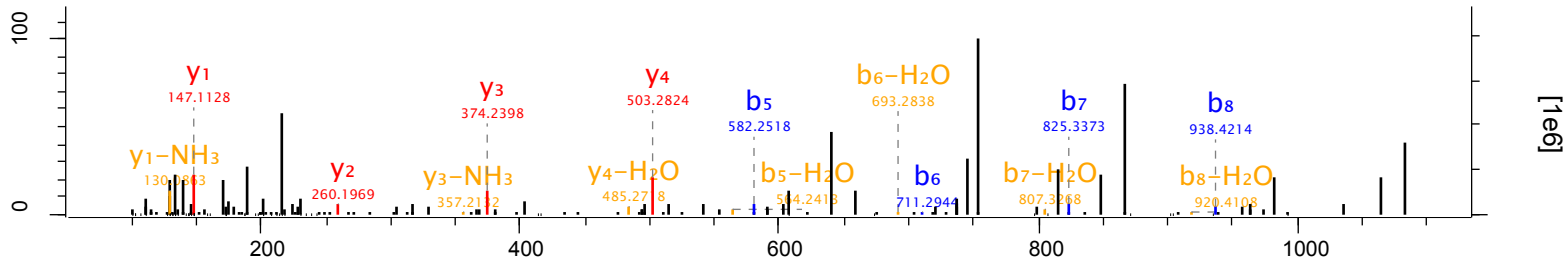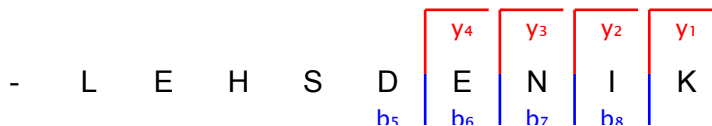

| Raw file                                      | Scan  | Method    | Score | m/z   | Gene names     |
|-----------------------------------------------|-------|-----------|-------|-------|----------------|
| 20120706_EXQ2_AtDe_SA_WTR_OG_pooled_final_1_5 | 27914 | FTMS; HCD | 80.74 | 920.9 | Krtap3-1;Krtap |

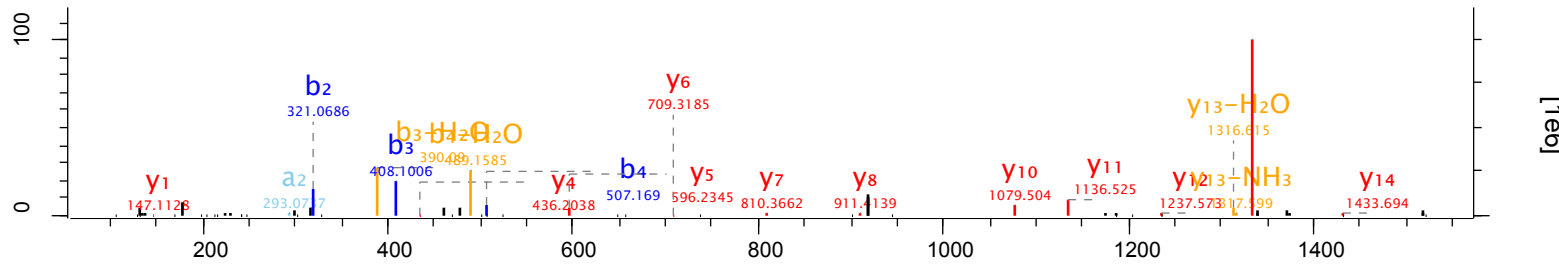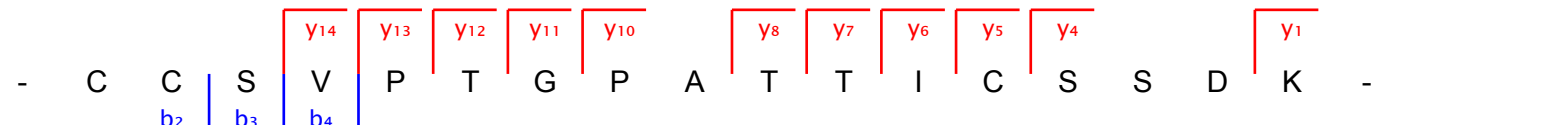

Raw file

20120706\_EXQ2\_AtDe\_SA\_WTR\_OG\_pooled\_final\_1\_5

Scan

29509

Method

FTMS; HCD

Score

104.82

m/z

745.91

Gene names

Abcc12

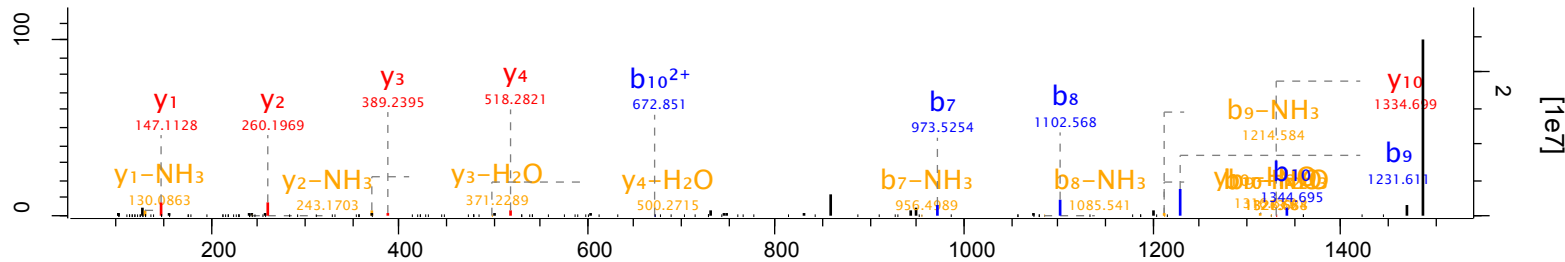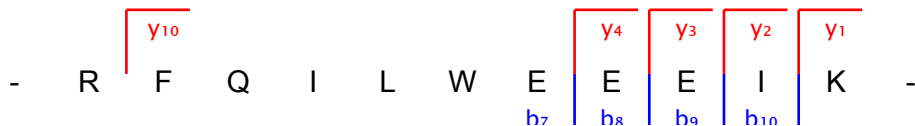

| Raw file                                      | Scan  | Method    | Score | m/z    | Gene names |
|-----------------------------------------------|-------|-----------|-------|--------|------------|
| 20120706_EXQ2_AtDe_SA_WTR_OG_pooled_final_1_5 | 32014 | FTMS; HCD | 101.6 | 476.24 | Mapk15     |

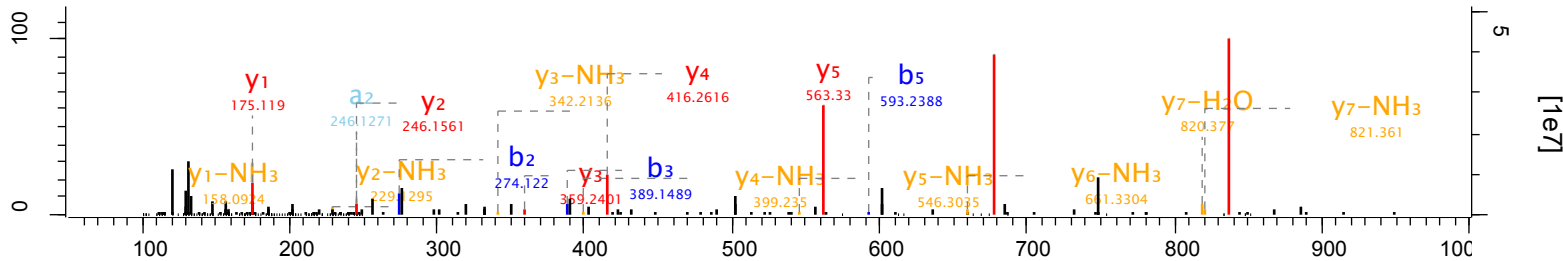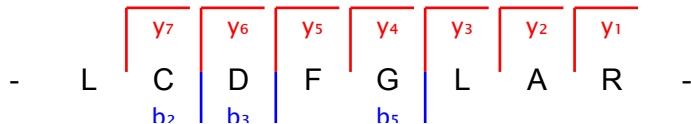

Raw file

20120706\_EXQ2\_AtDe\_SA\_WTR\_OG\_pooled\_final\_1\_5

Scan

41990

Method

FTMS; HCD

Score

175.54

m/z

784.37

Gene names

Coa6

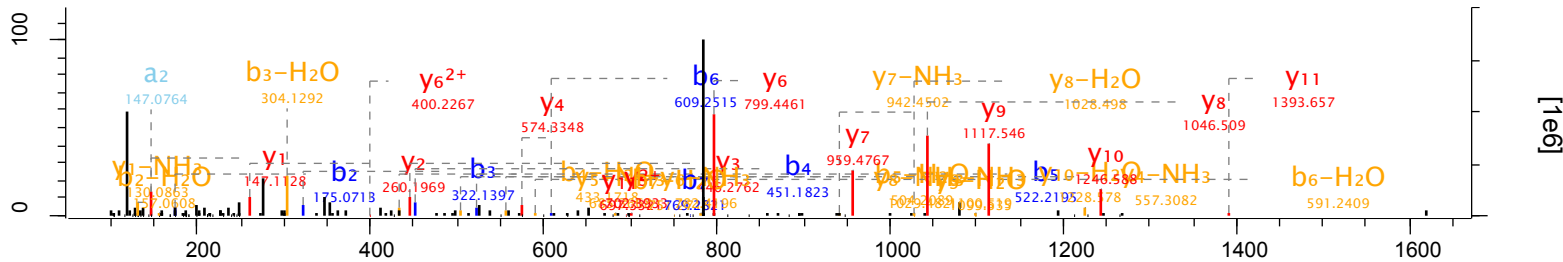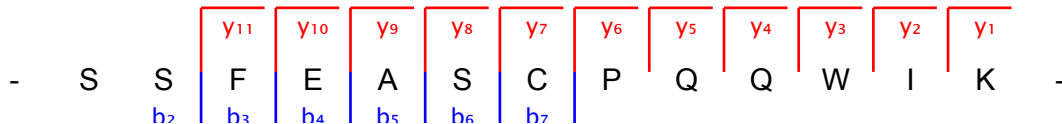

| Raw file                                      | Scan  | Method    | Score | m/z    | Gene names |
|-----------------------------------------------|-------|-----------|-------|--------|------------|
| 20120706_EXQ2_AtDe_SA_WTR_OG_pooled_final_1_5 | 45224 | FTMS; HCD | 71.08 | 619.34 | Tmem69     |

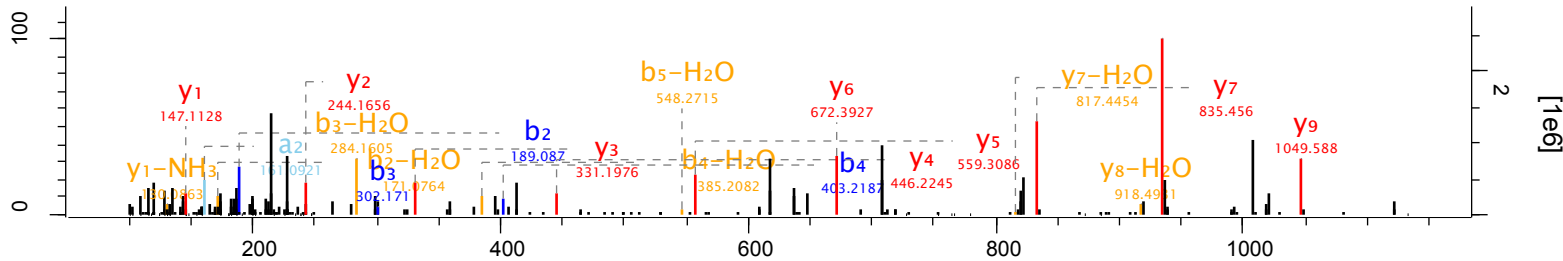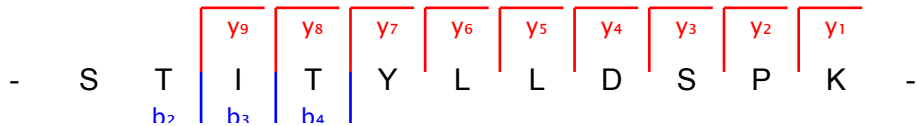



| Raw file                                      | Scan  | Method    | Score  | m/z   | Gene names |
|-----------------------------------------------|-------|-----------|--------|-------|------------|
| 20120706_EXQ2_AtDe_SA_WTR_OG_pooled_final_1_5 | 46557 | FTMS; HCD | 136.81 | 807.4 | Aqp7       |

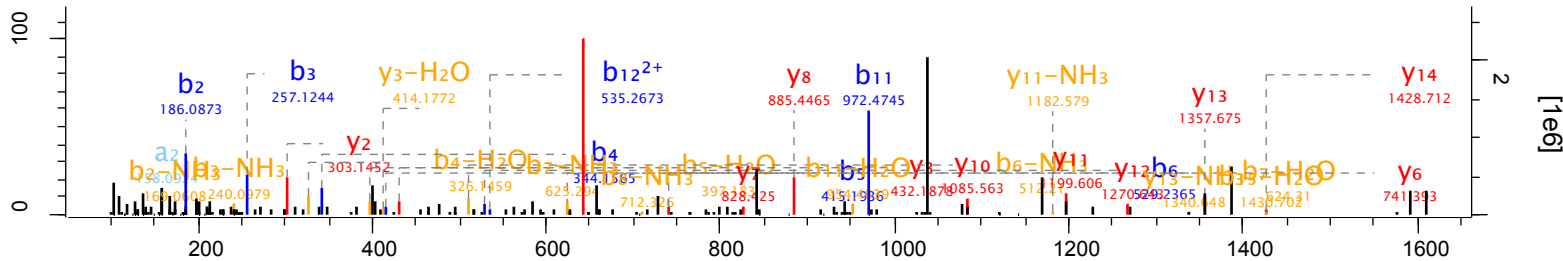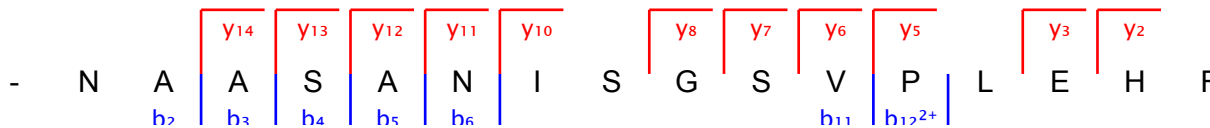

| Raw file                                      | Scan  | Method    | Score | m/z    | Gene names |
|-----------------------------------------------|-------|-----------|-------|--------|------------|
| 20120706_EXQ2_AtDe_SA_WTR_OG_pooled_final_1_5 | 47956 | FTMS; HCD | 97.73 | 623.84 | Pglyrp2    |

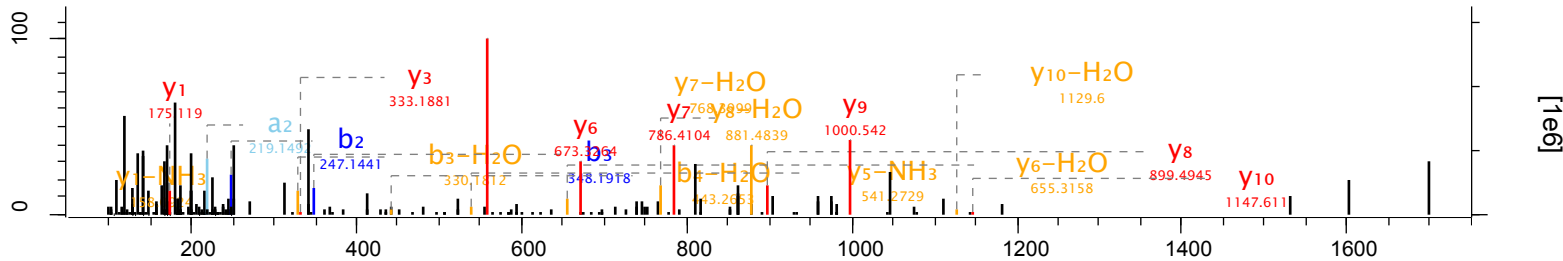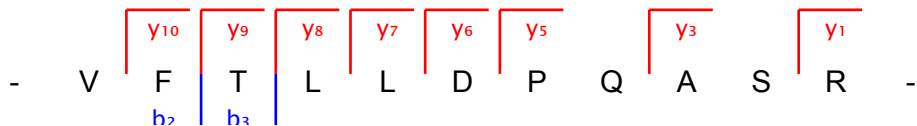

Raw file

Scan

Method

Score

m/z

Gene names

20120706\_EXQ2\_AtDe\_SA\_WTR\_OG\_pooled\_final\_1\_5

48626

FTMS; HCD

101.92

765.36

Cnih4

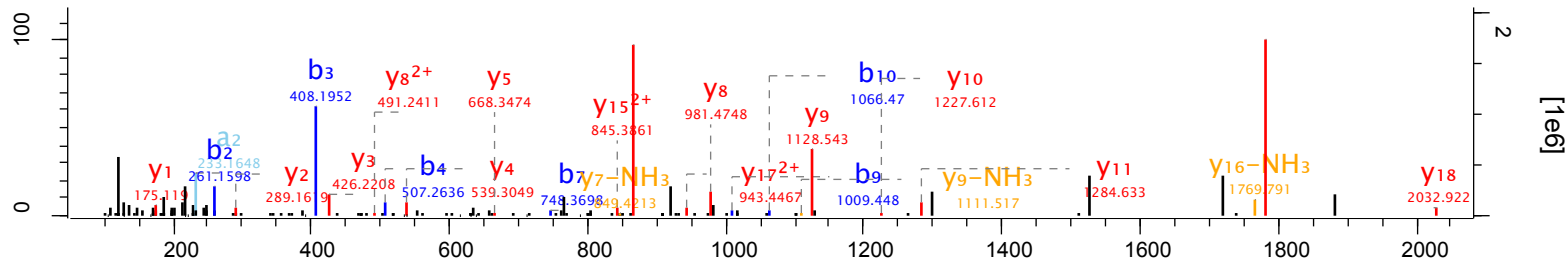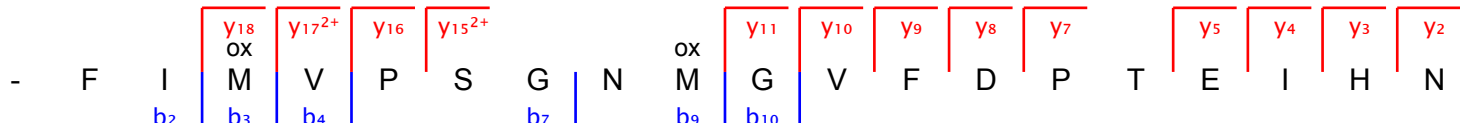

| Raw file                                      | Scan  | Method    | Score | m/z    | Gene names |
|-----------------------------------------------|-------|-----------|-------|--------|------------|
| 20120706_EXQ2_AtDe_SA_WTR_OG_pooled_final_1_5 | 49780 | FTMS; HCD | 43.68 | 708.31 | Ndufa1     |

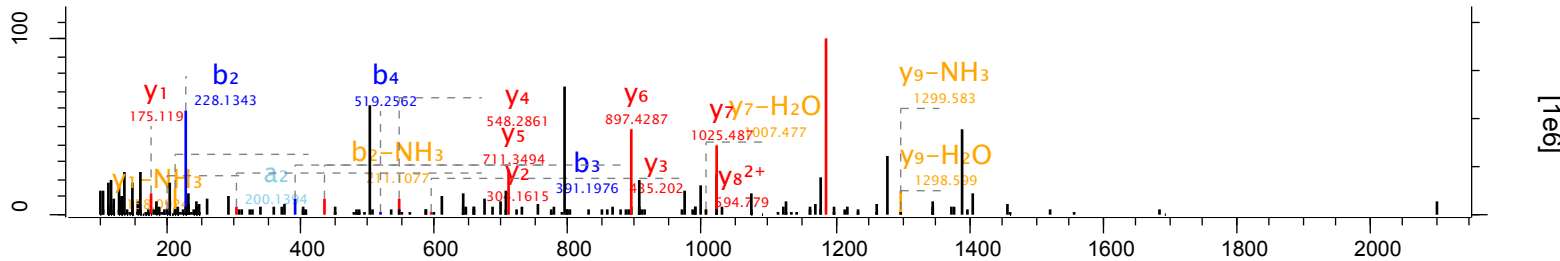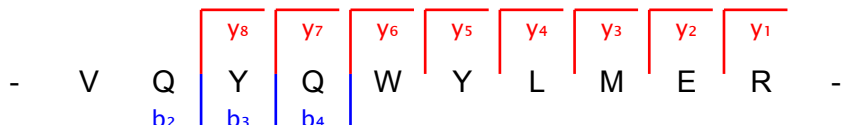

| Raw file                                      | Scan  | Method    | Score | m/z    | Gene names |
|-----------------------------------------------|-------|-----------|-------|--------|------------|
| 20120706_EXQ2_AtDe_SA_WTR_OG_pooled_final_1_5 | 53805 | FTMS; HCD | 76.3  | 760.37 | Cnih4      |

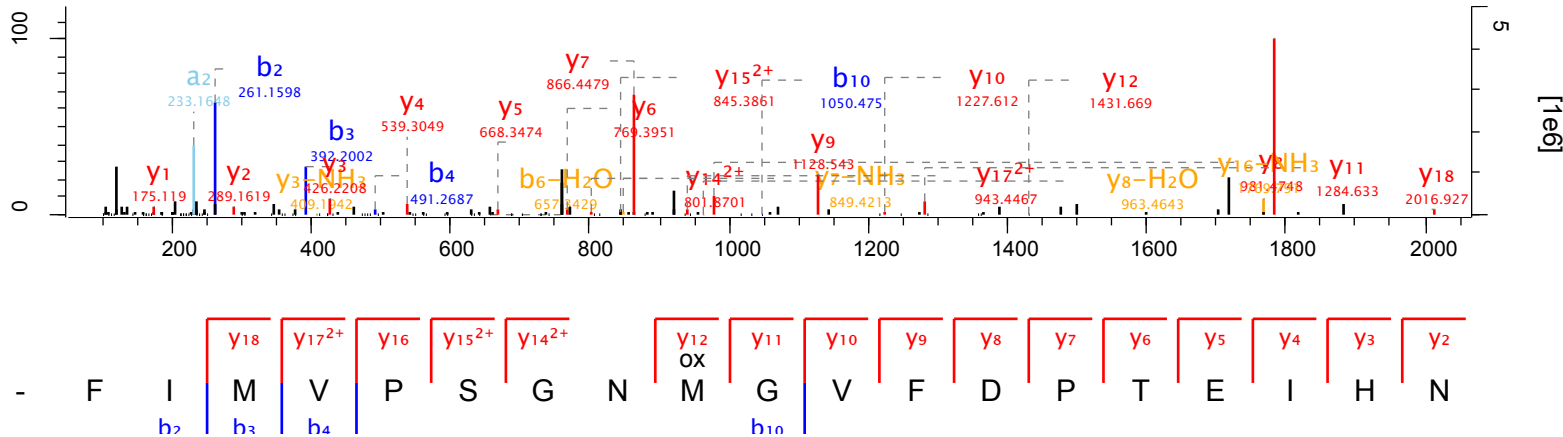

| Raw file                                      | Scan  | Method    | Score | m/z    | Gene names |
|-----------------------------------------------|-------|-----------|-------|--------|------------|
| 20120706_EXQ2_AtDe_SA_WTR_OG_pooled_final_1_5 | 56651 | FTMS; HCD | 76.18 | 760.04 | Cnih4      |

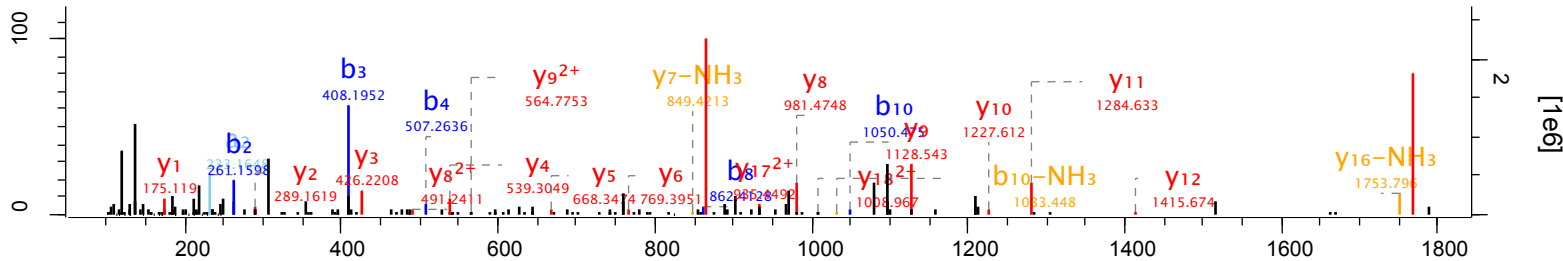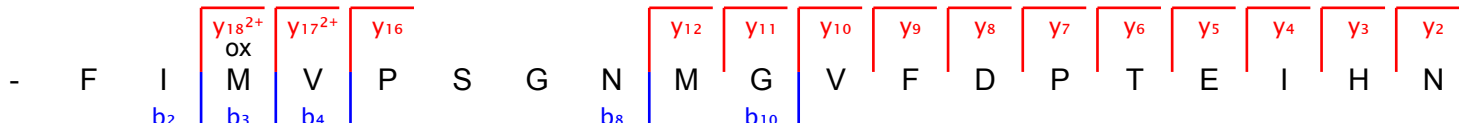

Raw file

Scan

Method

Score

m/z

20120706\_EXQ2\_AtDe\_SA\_WTR\_OG\_pooled\_final\_1\_5

56805

FTMS; HCD

140.96

859.48

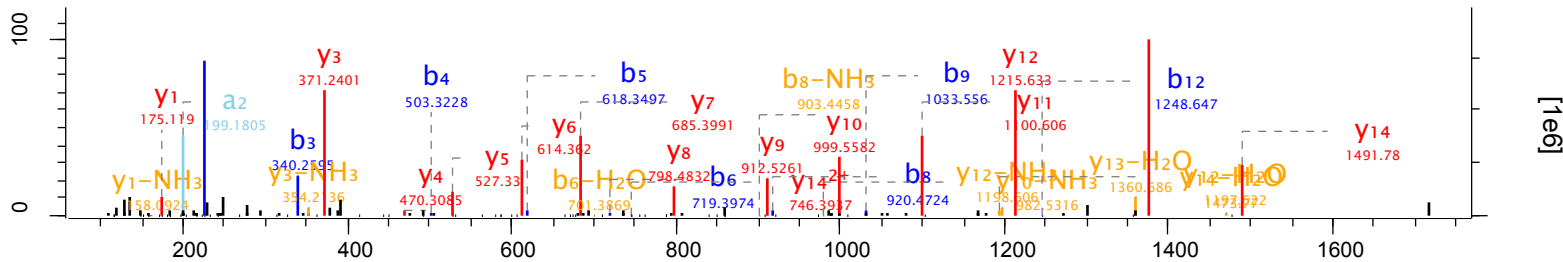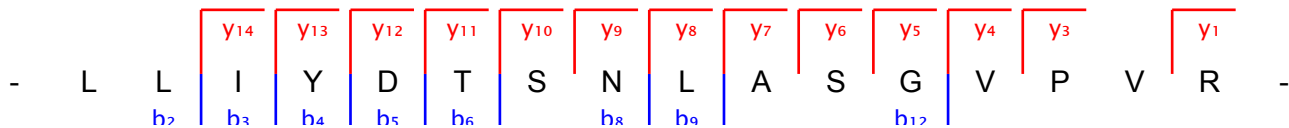

| Raw file                                      | Scan  | Method    | Score | m/z    | Gene names |
|-----------------------------------------------|-------|-----------|-------|--------|------------|
| 20120706_EXQ2_AtDe_SA_WTR_OG_pooled_final_1_5 | 57573 | FTMS; HCD | 83.86 | 626.82 | Ag2        |

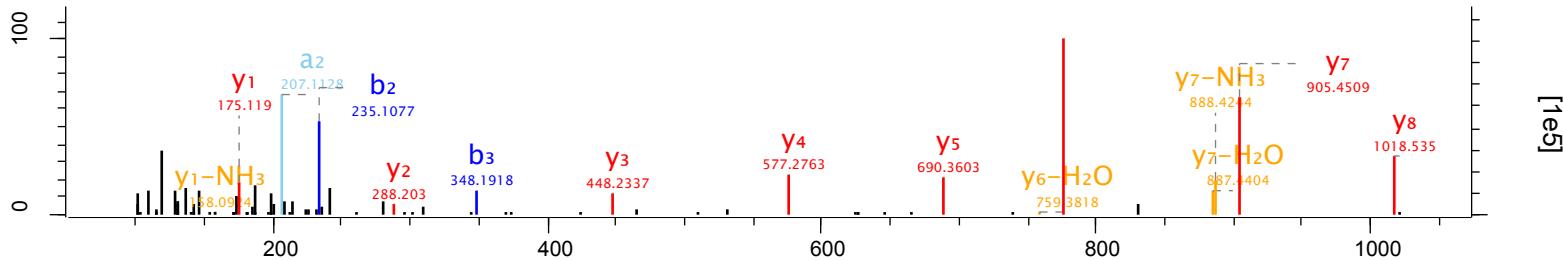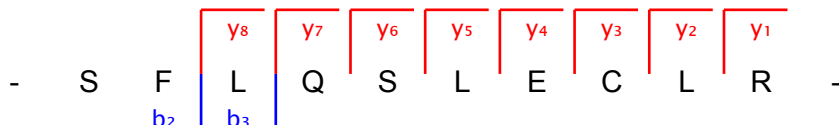



| Raw file                                      | Scan  | Method    | Score  | m/z   | Gene names |
|-----------------------------------------------|-------|-----------|--------|-------|------------|
| 20120706_EXQ2_AtDe_SA_WTR_OG_pooled_final_1_5 | 60121 | FTMS; HCD | 174.19 | 754.7 | Cnih4      |

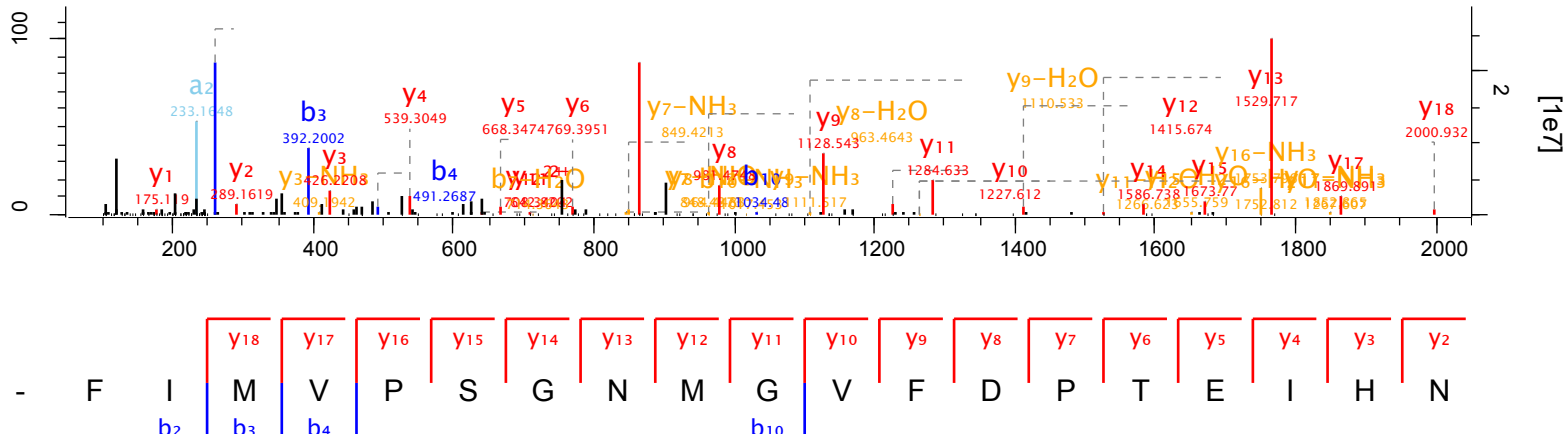

| Raw file                                      | Scan  | Method    | Score | m/z     | Gene name |
|-----------------------------------------------|-------|-----------|-------|---------|-----------|
| 20120706_EXQ2_AtDe_SA_WTR_OG_pooled_final_1_5 | 60144 | FTMS; HCD | 140.2 | 1131.55 | Cnih4     |

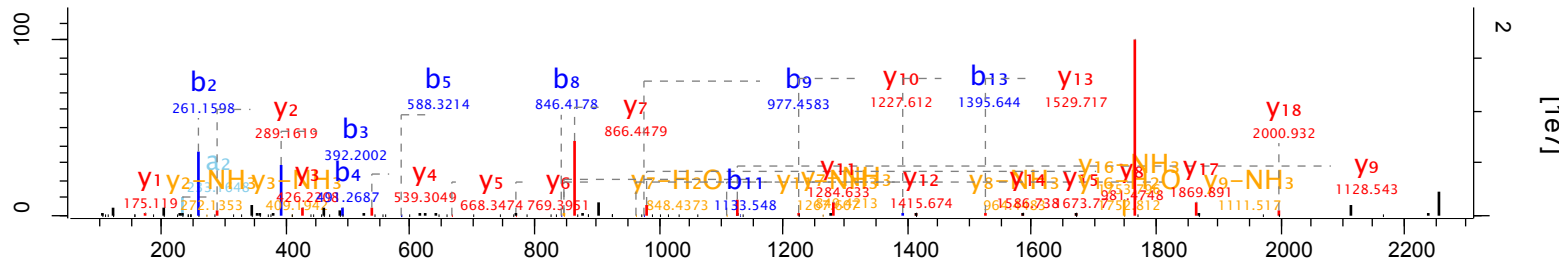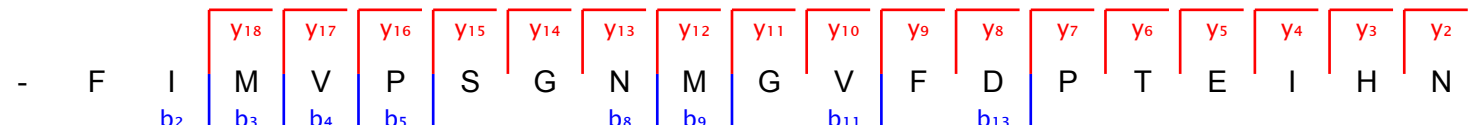

| Raw file                                      | Scan  | Method    | Score | m/z    | Gene names |
|-----------------------------------------------|-------|-----------|-------|--------|------------|
| 20120706_EXQ2_AtDe_SA_WTR_OG_pooled_final_1_5 | 64954 | FTMS; HCD | 86.46 | 715.91 | Uqcr11     |

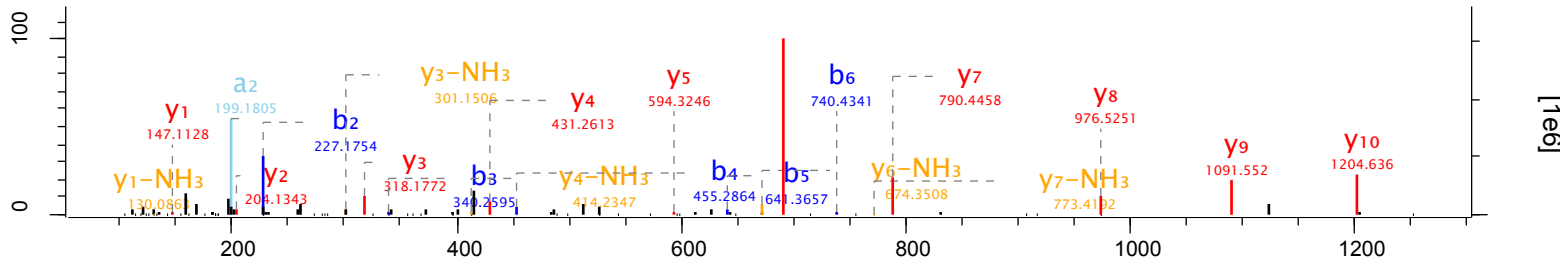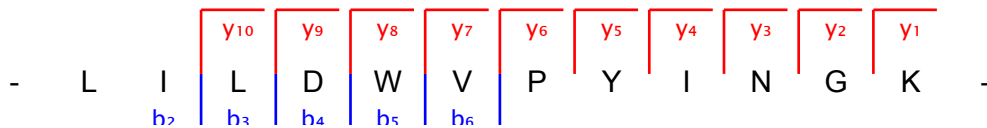

| Raw file                                      | Scan  | Method    | Score  | m/z    | Gene names |
|-----------------------------------------------|-------|-----------|--------|--------|------------|
| 20120706_EXQ2_AtDe_SA_WTR_OG_pooled_final_2_1 | 13972 | FTMS; HCD | 116.98 | 723.36 | Tmem100    |

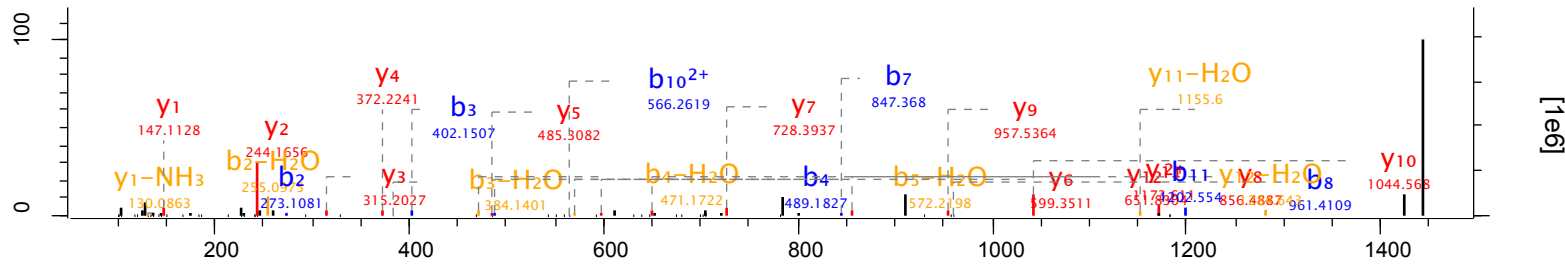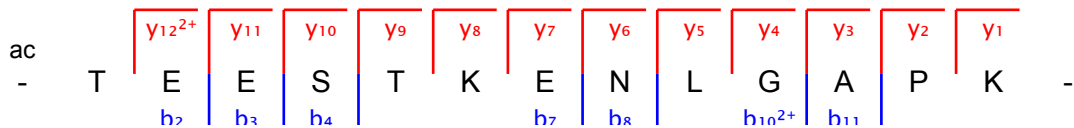

Raw file

Scan

Method

Score

m/z

20120706\_EXQ2\_AtDe\_SA\_WTR\_OG\_pooled\_final\_2\_1

35634

FTMS; HCD

105.03

803.36

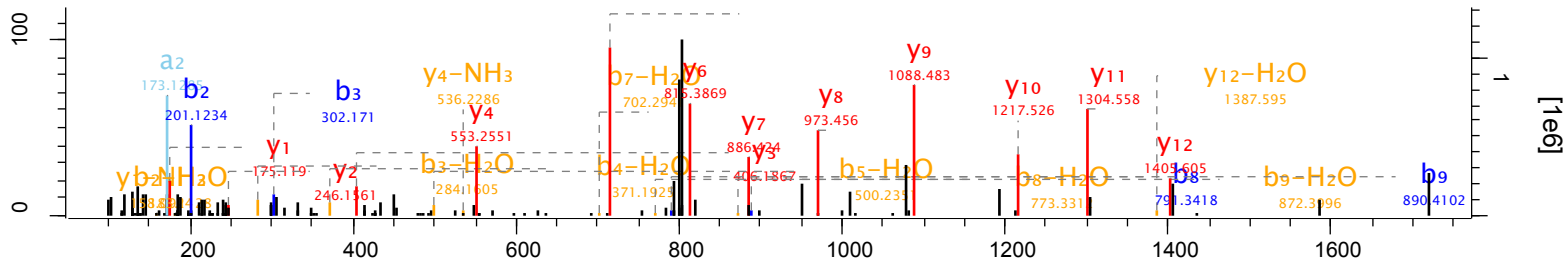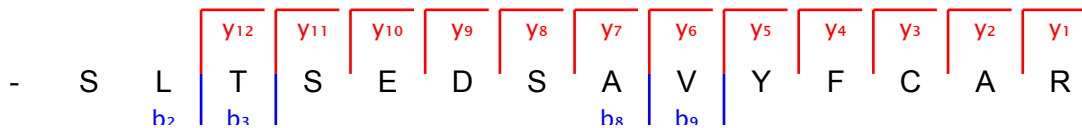

| Raw file                                      | Scan  | Method    | Score | m/z    | Gene names |
|-----------------------------------------------|-------|-----------|-------|--------|------------|
| 20120706_EXQ2_AtDe_SA_WTR_OG_pooled_final_2_1 | 56903 | FTMS; HCD | 86.94 | 687.89 | Ppp1r3d    |

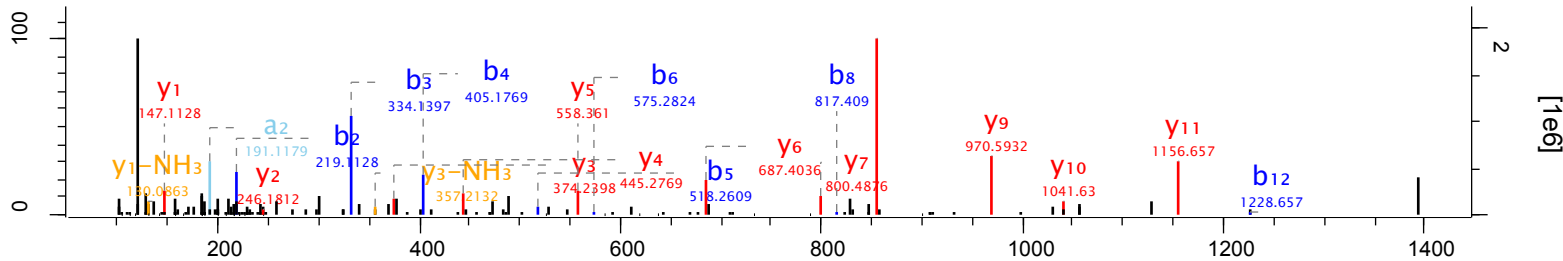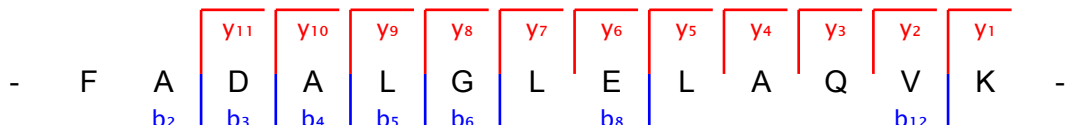

| Raw file                                      | Scan  | Method    | Score  | m/z    | Gene names |
|-----------------------------------------------|-------|-----------|--------|--------|------------|
| 20120706_EXQ2_AtDe_SA_WTR_OG_pooled_final_2_1 | 66676 | FTMS; HCD | 259.53 | 948.99 | Tppp       |

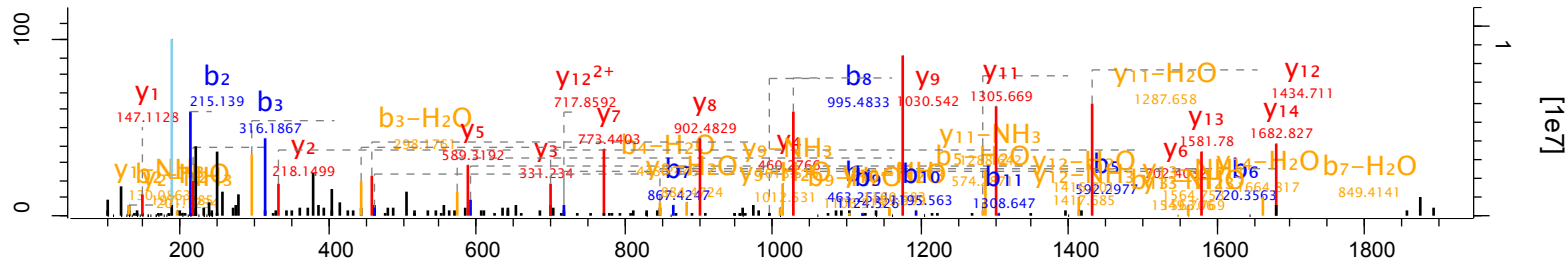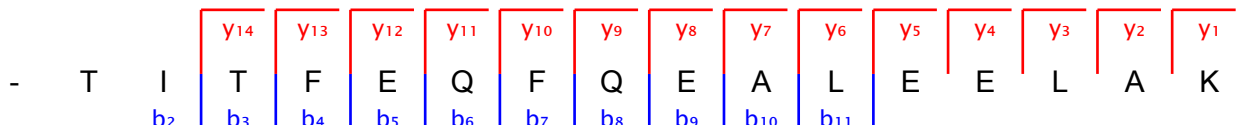

| Raw file                                      | Scan | Method    | Score | m/z    | Gene names |
|-----------------------------------------------|------|-----------|-------|--------|------------|
| 20120706_EXQ2_AtDe_SA_WTR_OG_pooled_final_2_1 | 9863 | FTMS; HCD | 50.83 | 542.77 | Rgs13      |

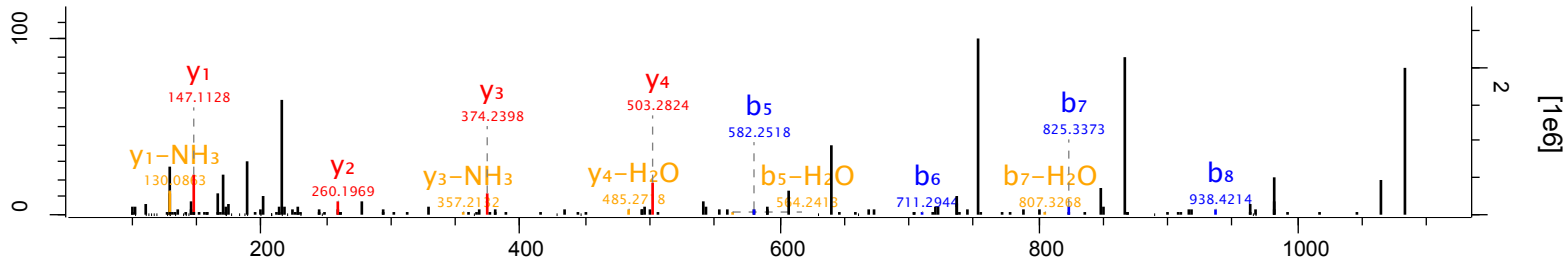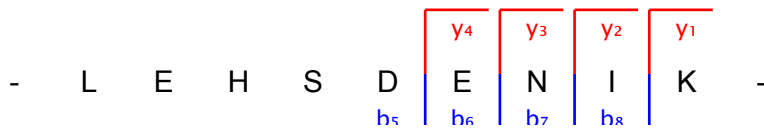



Raw file

Scan

Method

Score

m/z

20120706\_EXQ2\_AtDe\_SA\_WTR\_OG\_pooled\_final\_2\_11

10660

FTMS; HCD

115.33

536.79

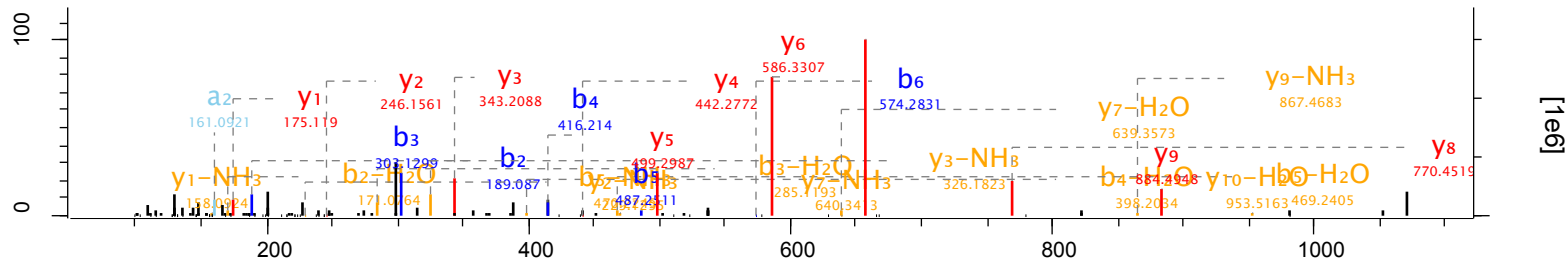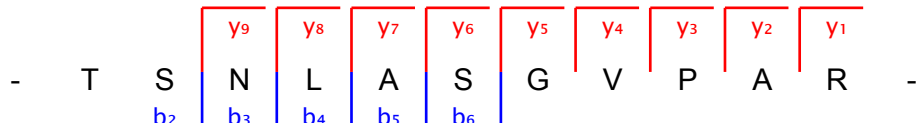

| Raw file                                       | Scan  | Method    | Score | m/z    | Gene names |
|------------------------------------------------|-------|-----------|-------|--------|------------|
| 20120706_EXQ2_AtDe_SA_WTR_OG_pooled_final_2_11 | 16514 | FTMS; HCD | 56.04 | 391.22 | Ndufa4l2   |

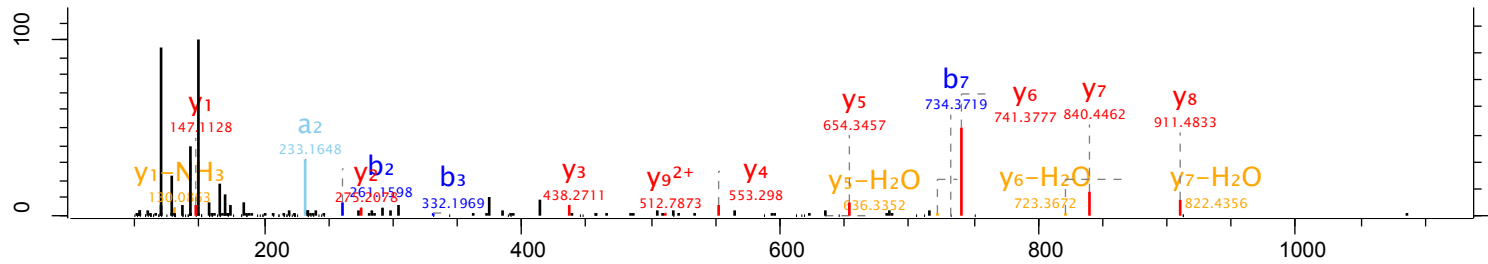

[1e6]

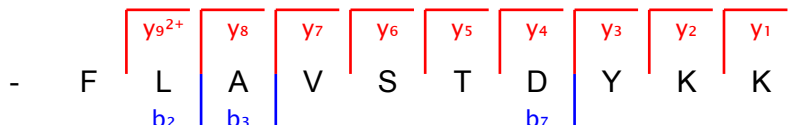

| Raw file                                       | Scan  | Method    | Score | m/z    | Gene names |
|------------------------------------------------|-------|-----------|-------|--------|------------|
| 20120706_EXQ2_AtDe_SA_WTR_OG_pooled_final_2_11 | 20918 | FTMS; HCD | 76.07 | 762.89 | Nfatc2     |

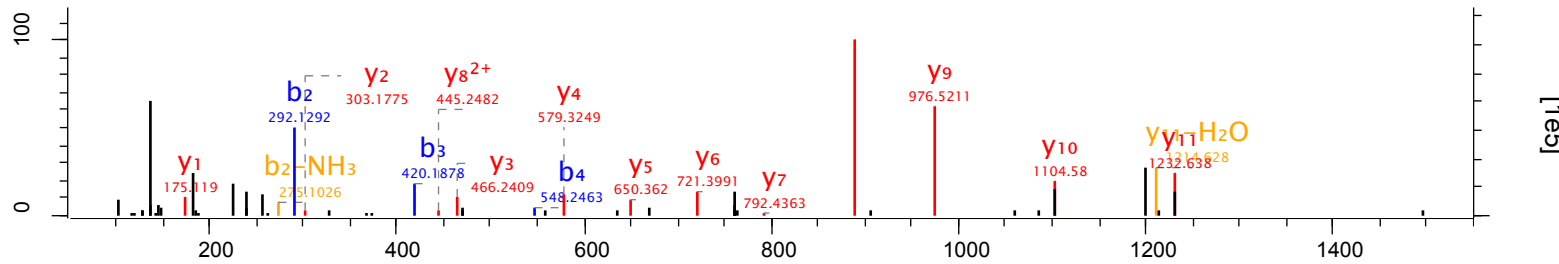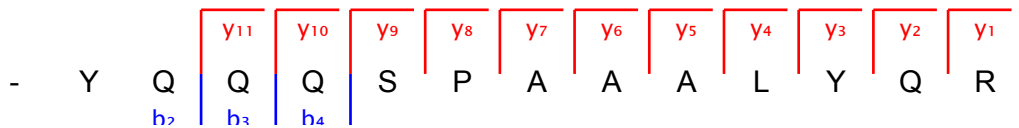

Raw file

Scan

Method

Score

m/z

20120706\_EXQ2\_AtDe\_SA\_WTR\_OG\_pooled\_final\_2\_11

22069

FTMS; HCD

75.76

651.82

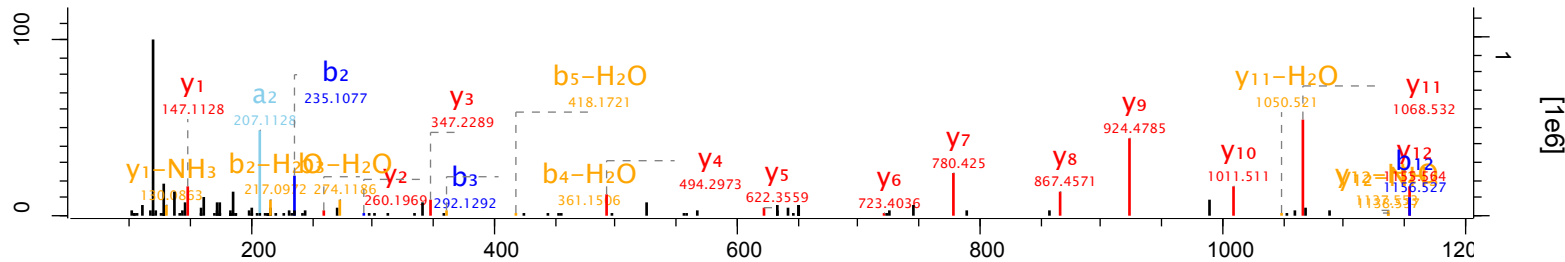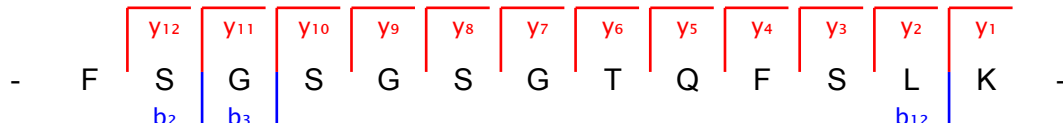

| Raw file                                       | Scan  | Method    | Score  | m/z    | Gene name |
|------------------------------------------------|-------|-----------|--------|--------|-----------|
| 20120706_EXQ2_AtDe_SA_WTR_OG_pooled_final_2_11 | 22112 | FTMS; HCD | 152.54 | 587.83 | Syngn2    |

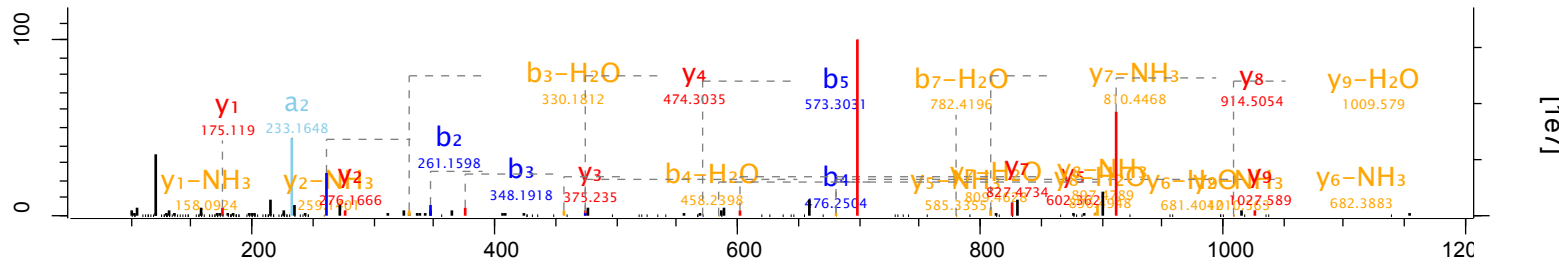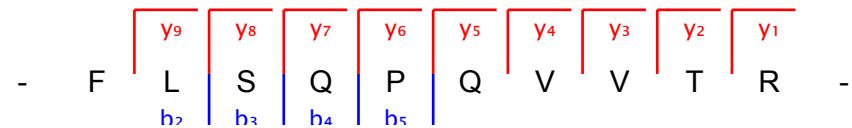

| Raw file                                       | Scan  | Method    | Score | m/z    | Gene names |
|------------------------------------------------|-------|-----------|-------|--------|------------|
| 20120706_EXQ2_AtDe_SA_WTR_OG_pooled_final_2_11 | 33896 | FTMS; HCD | 43.59 | 800.91 | Krtap19-5  |

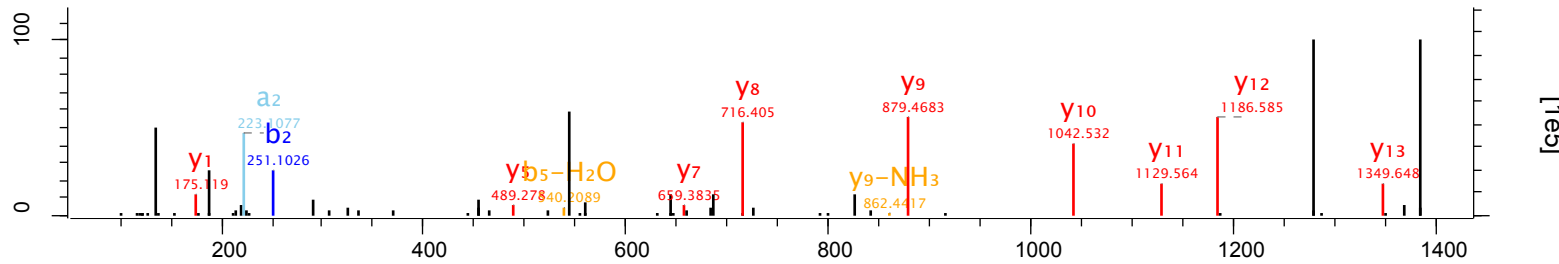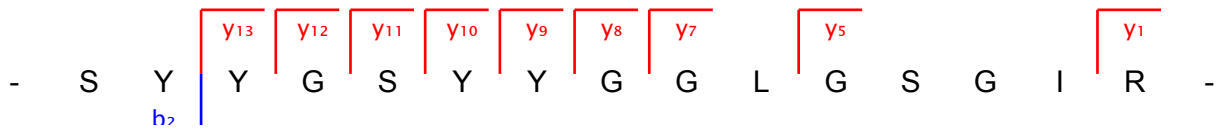

| Raw file                                       | Scan | Method    | Score | m/z    | Gene names |
|------------------------------------------------|------|-----------|-------|--------|------------|
| 20120706_EXQ2_AtDe_SA_WTR_OG_pooled_final_2_11 | 9245 | FTMS; HCD | 89.75 | 773.78 | Krtap21-1  |

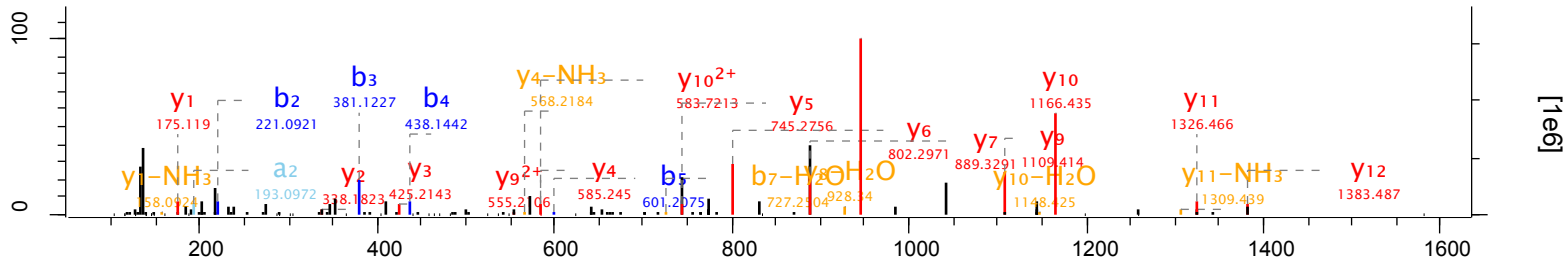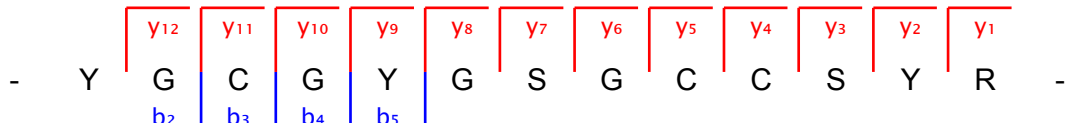

Raw file

Scan

Method

Score

m/z

20120706\_EXQ2\_AtDe\_SA\_WTR\_OG\_pooled\_final\_2\_12

10326

FTMS; HCD

49.45

536.79

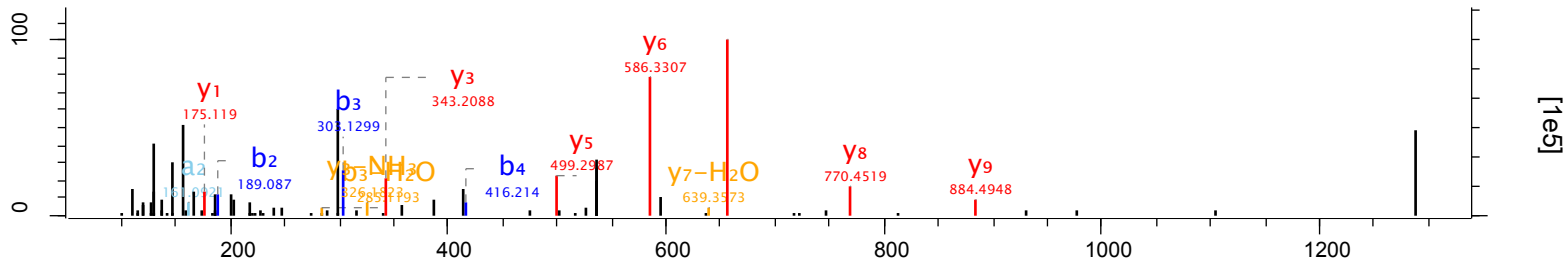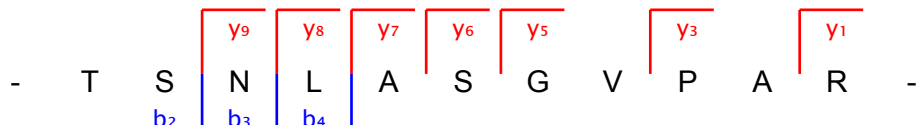



| Raw file                                       | Scan  | Method    | Score  | m/z    | Gene name |
|------------------------------------------------|-------|-----------|--------|--------|-----------|
| 20120706_EXQ2_AtDe_SA_WTR_OG_pooled_final_2_12 | 13328 | FTMS; HCD | 109.64 | 675.36 | Stap2     |

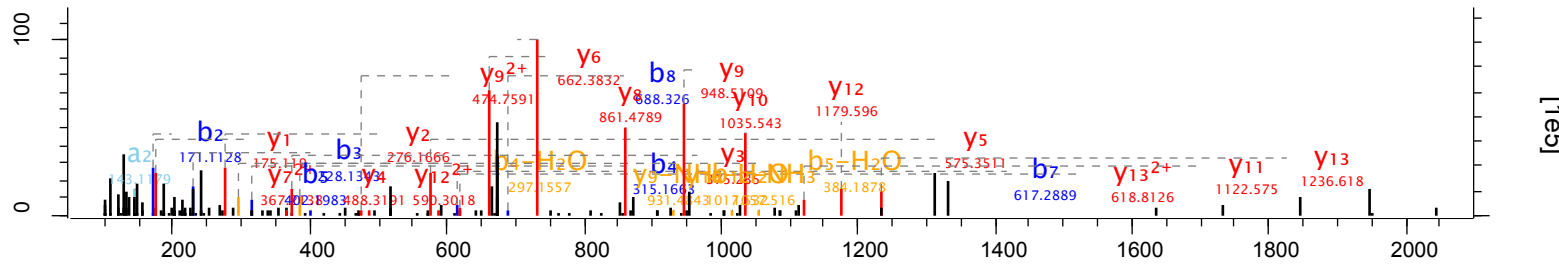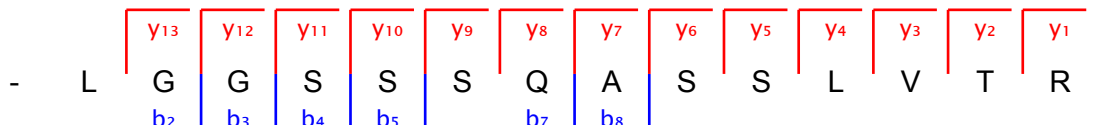

Raw file

20120706\_EXQ2\_AtDe\_SA\_WTR\_OG\_pooled\_final\_2\_12

Scan

21013

Method

FTMS; HCD

Score

116.19

m/z

651.82

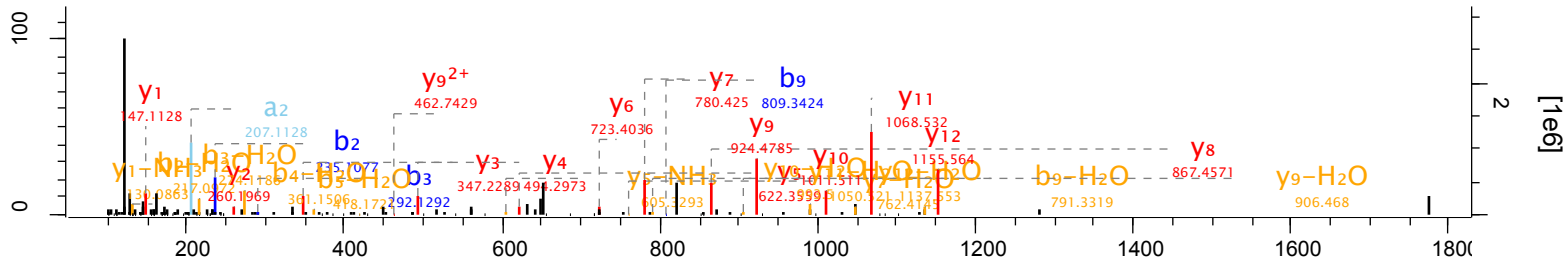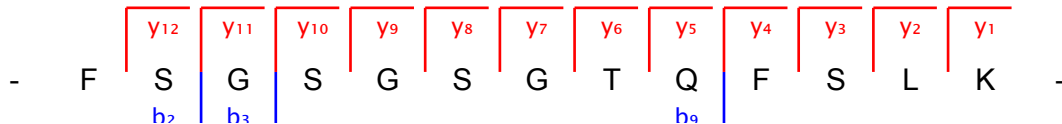

| Raw file                                       | Scan  | Method    | Score  | m/z    | Gene name |
|------------------------------------------------|-------|-----------|--------|--------|-----------|
| 20120706_EXQ2_AtDe_SA_WTR_OG_pooled_final_2_12 | 33363 | FTMS; HCD | 132.84 | 874.44 | Bri3      |

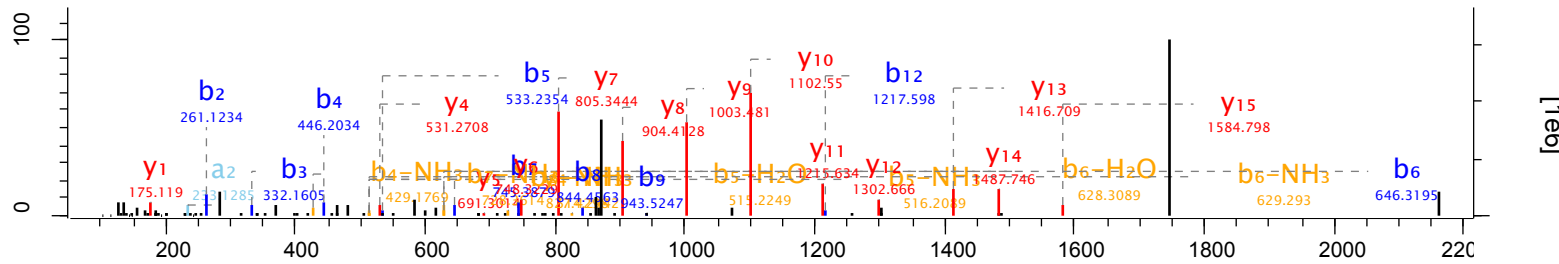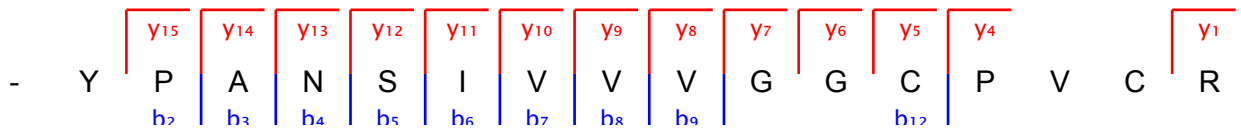

| Raw file                                       | Scan  | Method    | Score | m/z   | Gene names |
|------------------------------------------------|-------|-----------|-------|-------|------------|
| 20120706_EXQ2_AtDe_SA_WTR_OG_pooled_final_2_12 | 39070 | FTMS; HCD | 70.82 | 518.8 | Rhag       |

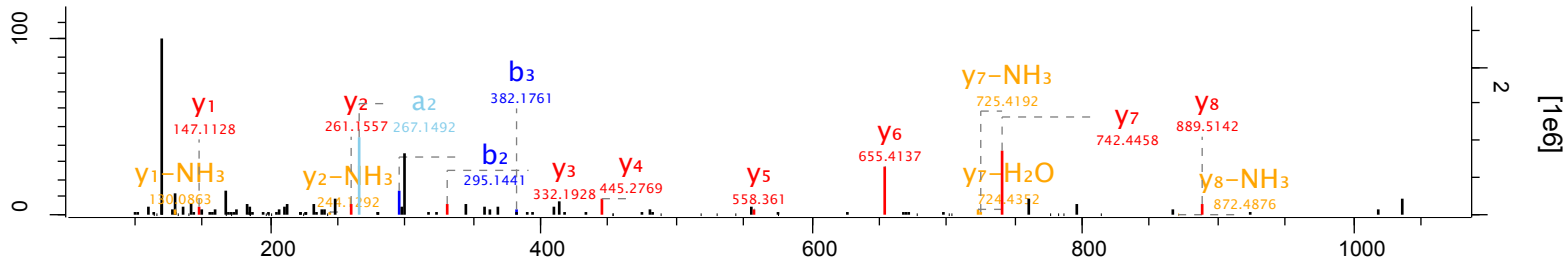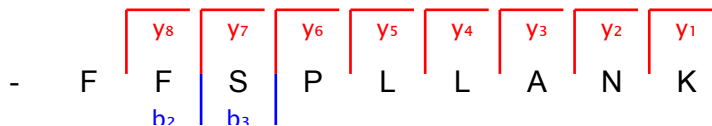

| Raw file                                       | Scan  | Method    | Score | m/z   | Gene names |
|------------------------------------------------|-------|-----------|-------|-------|------------|
| 20120706_EXQ2_AtDe_SA_WTR_OG_pooled_final_2_12 | 39700 | FTMS; HCD | 80.36 | 881.5 | Krtcap2    |

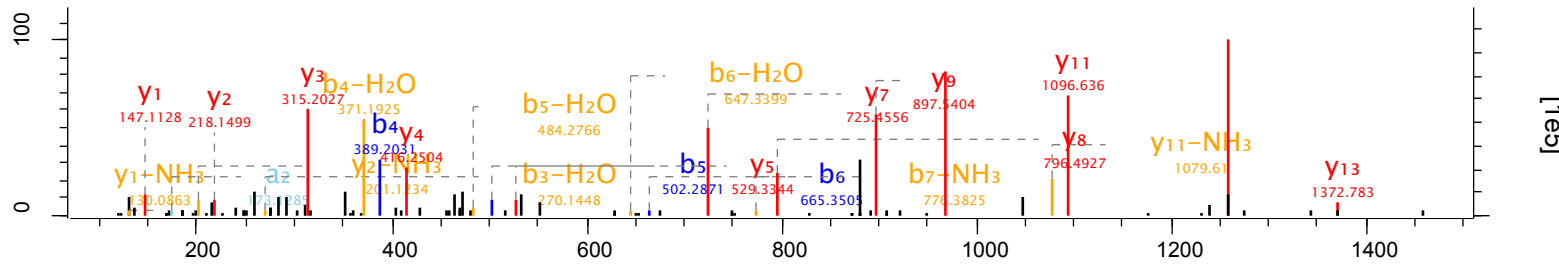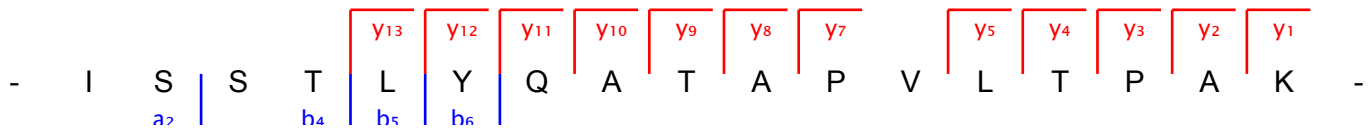

| Raw file                                       | Scan  | Method    | Score | m/z    | Gene names |
|------------------------------------------------|-------|-----------|-------|--------|------------|
| 20120706_EXQ2_AtDe_SA_WTR_OG_pooled_final_2_12 | 39743 | FTMS; HCD | 33.09 | 587.33 | Krtcap2    |

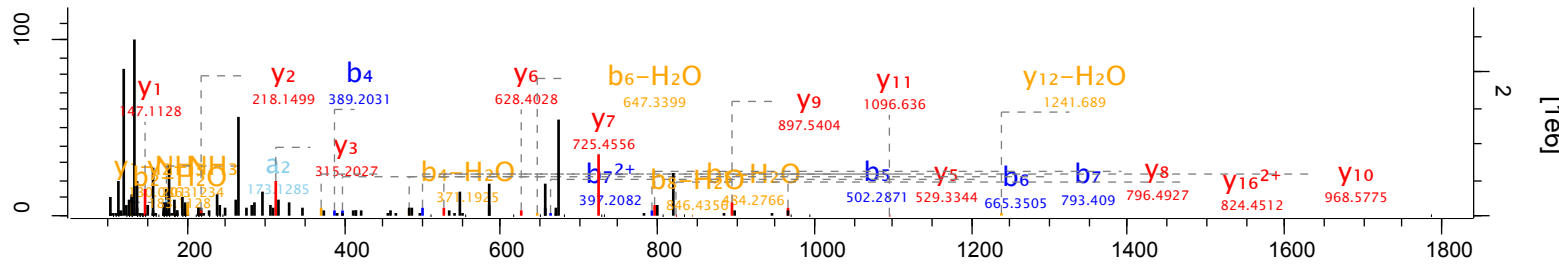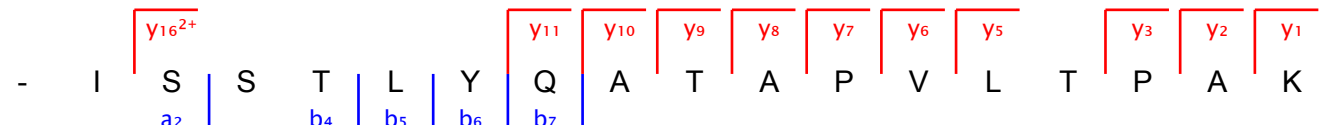

| Raw file                                       | Scan  | Method    | Score | m/z    | Gene names |
|------------------------------------------------|-------|-----------|-------|--------|------------|
| 20120706_EXQ2_AtDe_SA_WTR_OG_pooled_final_2_12 | 42741 | FTMS; HCD | 74.61 | 602.34 | Kctd12b    |

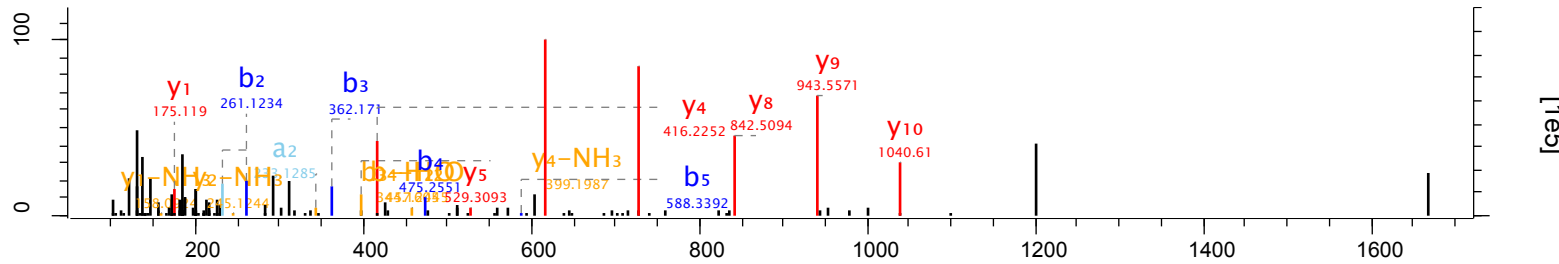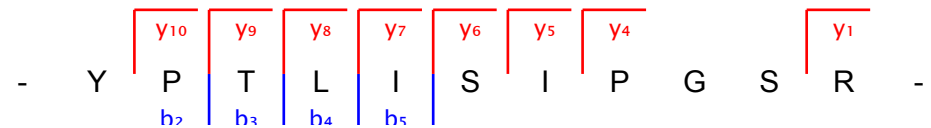

| Raw file                                       | Scan  | Method    | Score | m/z    | Gene names |
|------------------------------------------------|-------|-----------|-------|--------|------------|
| 20120706_EXQ2_AtDe_SA_WTR_OG_pooled_final_2_12 | 47666 | FTMS; HCD | 47.56 | 758.41 | Pllp       |

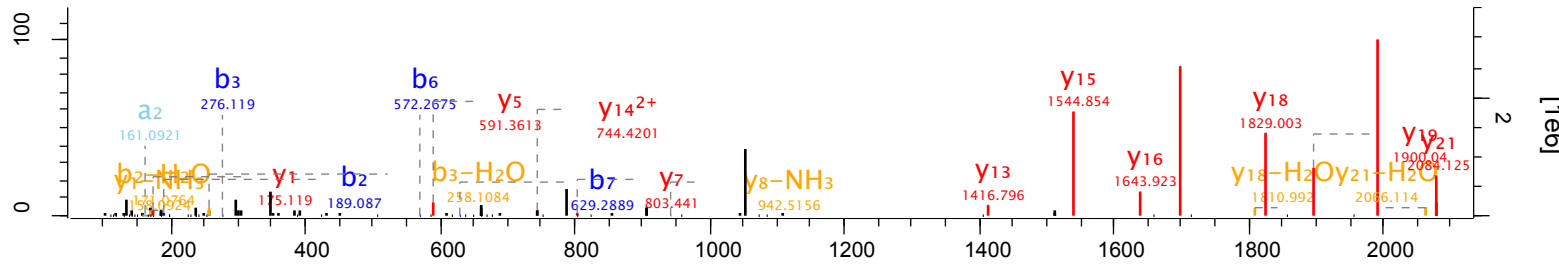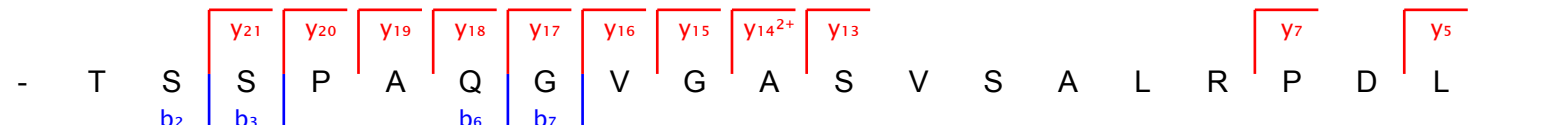



| Raw file                                       | Scan  | Method    | Score | m/z    | Gene names |
|------------------------------------------------|-------|-----------|-------|--------|------------|
| 20120706_EXQ2_AtDe_SA_WTR_OG_pooled_final_2_12 | 51088 | FTMS; HCD | 78.69 | 791.46 | Eln        |

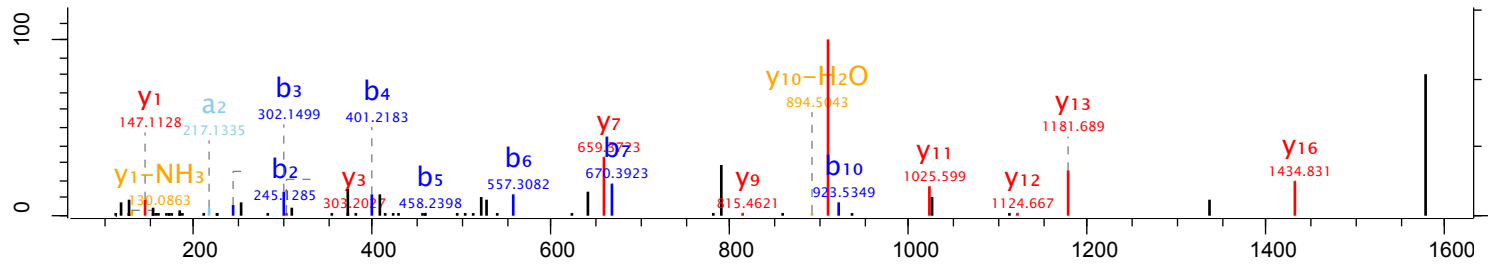

[1e6]

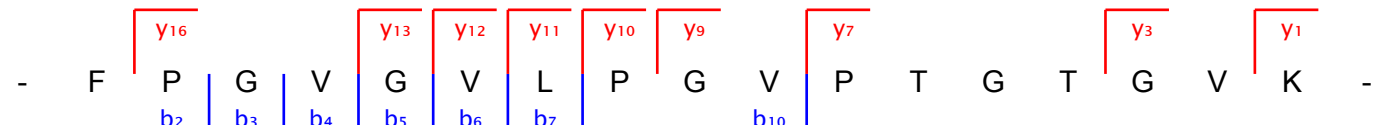

| Raw file                                      | Scan  | Method    | Score | m/z    | Gene names |
|-----------------------------------------------|-------|-----------|-------|--------|------------|
| 20120706_EXQ2_AtDe_SA_WTR_OG_pooled_final_2_2 | 10145 | FTMS; HCD | 73.23 | 542.77 | Rgs13      |

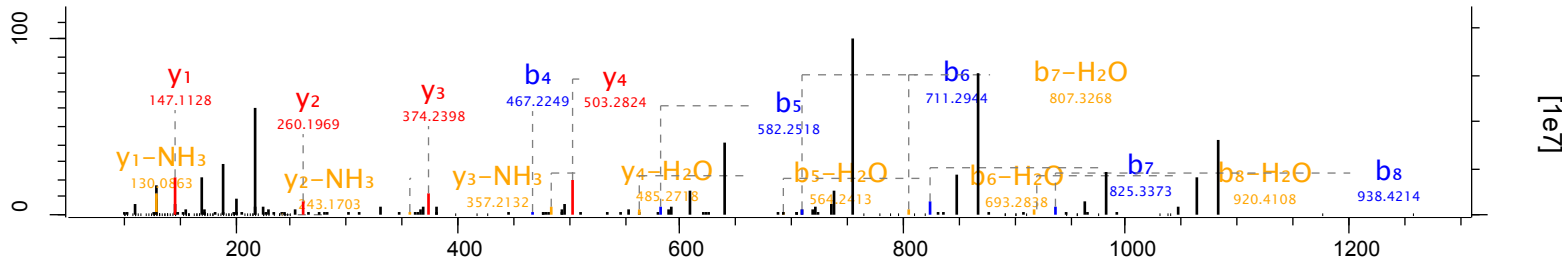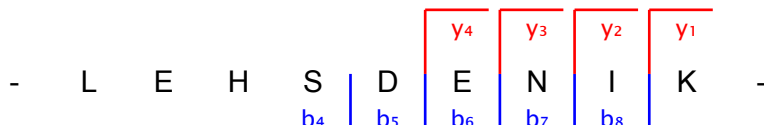

| Raw file                                      | Scan  | Method    | Score  | m/z    | Gene names |
|-----------------------------------------------|-------|-----------|--------|--------|------------|
| 20120706_EXQ2_AtDe_SA_WTR_OG_pooled_final_2_2 | 16094 | FTMS; HCD | 140.57 | 710.35 | C1qb       |

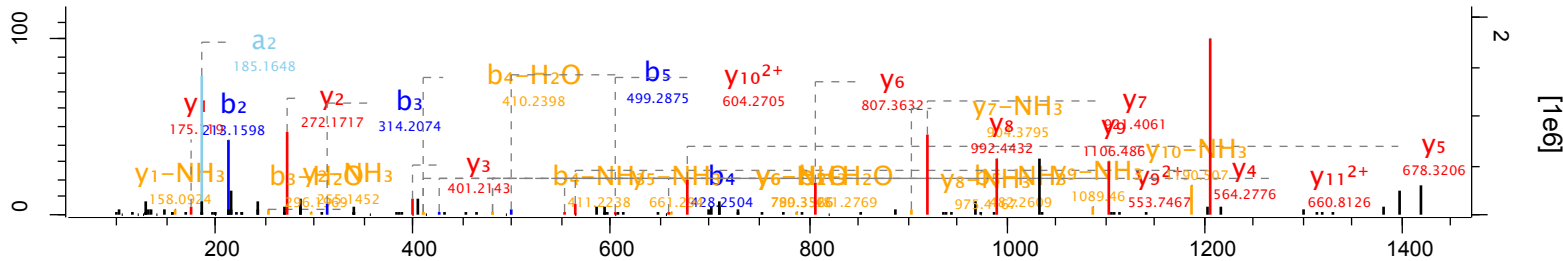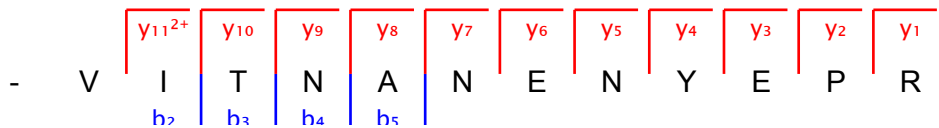

| Raw file                                      | Scan  | Method    | Score | m/z    | Gene names |
|-----------------------------------------------|-------|-----------|-------|--------|------------|
| 20120706_EXQ2_AtDe_SA_WTR_OG_pooled_final_2_2 | 18989 | FTMS; HCD | 86.7  | 672.86 | Slc29a2    |

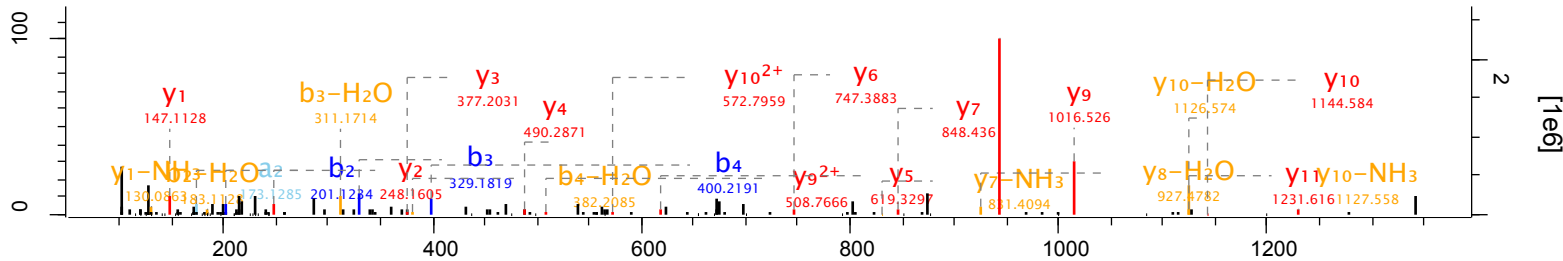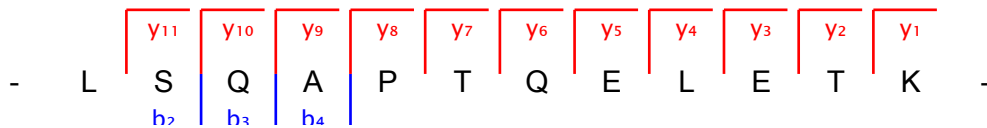

| Raw file                                      | Scan  | Method    | Score | m/z    | Gene names |
|-----------------------------------------------|-------|-----------|-------|--------|------------|
| 20120706_EXQ2_AtDe_SA_WTR_OG_pooled_final_2_2 | 22778 | FTMS; HCD | 65.47 | 483.76 | Tmem258    |

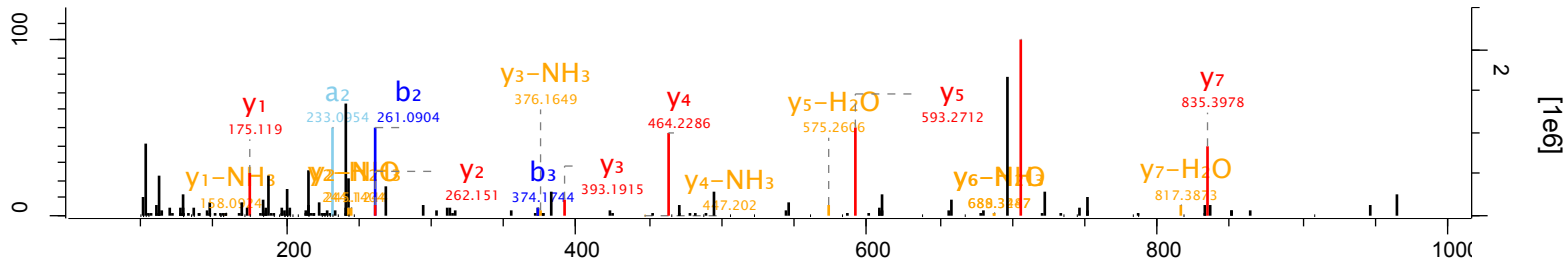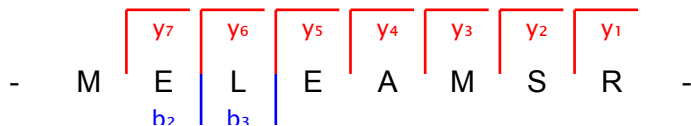

| Raw file                                      | Scan  | Method    | Score | m/z    | Gene names |
|-----------------------------------------------|-------|-----------|-------|--------|------------|
| 20120706_EXQ2_AtDe_SA_WTR_OG_pooled_final_2_2 | 22786 | FTMS; HCD | 79.89 | 483.72 | Tmem258    |

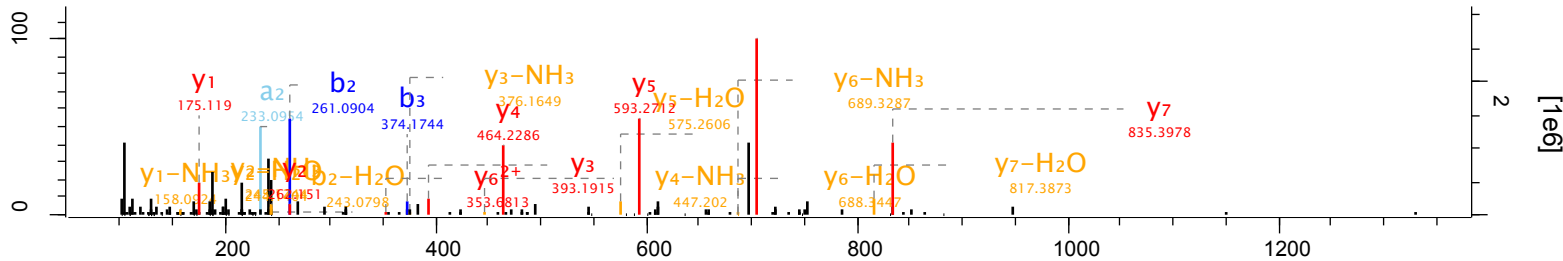

| Raw file                                      | Scan  | Method    | Score | m/z    | Gene names |
|-----------------------------------------------|-------|-----------|-------|--------|------------|
| 20120706_EXQ2_AtDe_SA_WTR_OG_pooled_final_2_2 | 39446 | FTMS; HCD | 68.49 | 635.79 | Gcsh       |

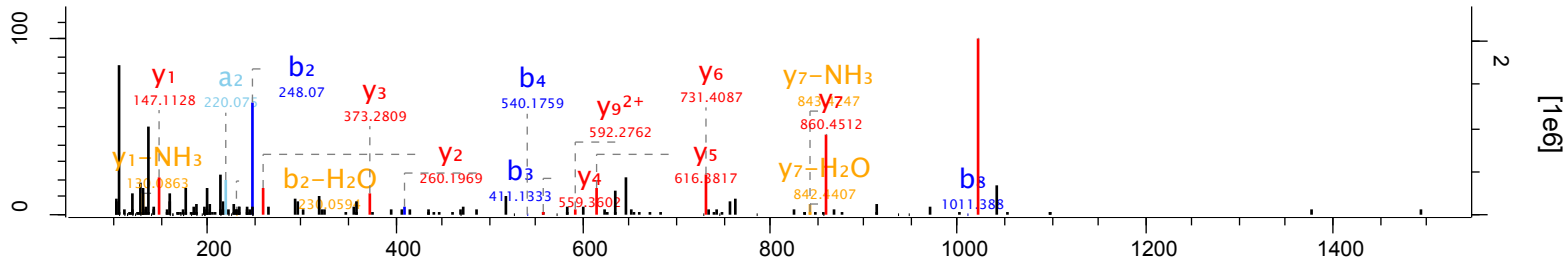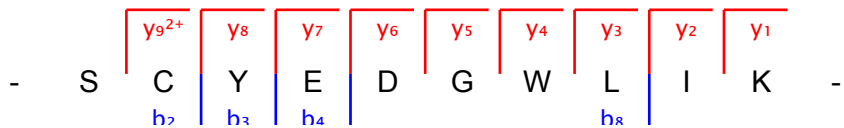

| Raw file                                      | Scan  | Method    | Score | m/z    | Gene names |
|-----------------------------------------------|-------|-----------|-------|--------|------------|
| 20120706_EXQ2_AtDe_SA_WTR_OG_pooled_final_2_2 | 65115 | FTMS; HCD | 139.2 | 1207.6 | Ly6a       |

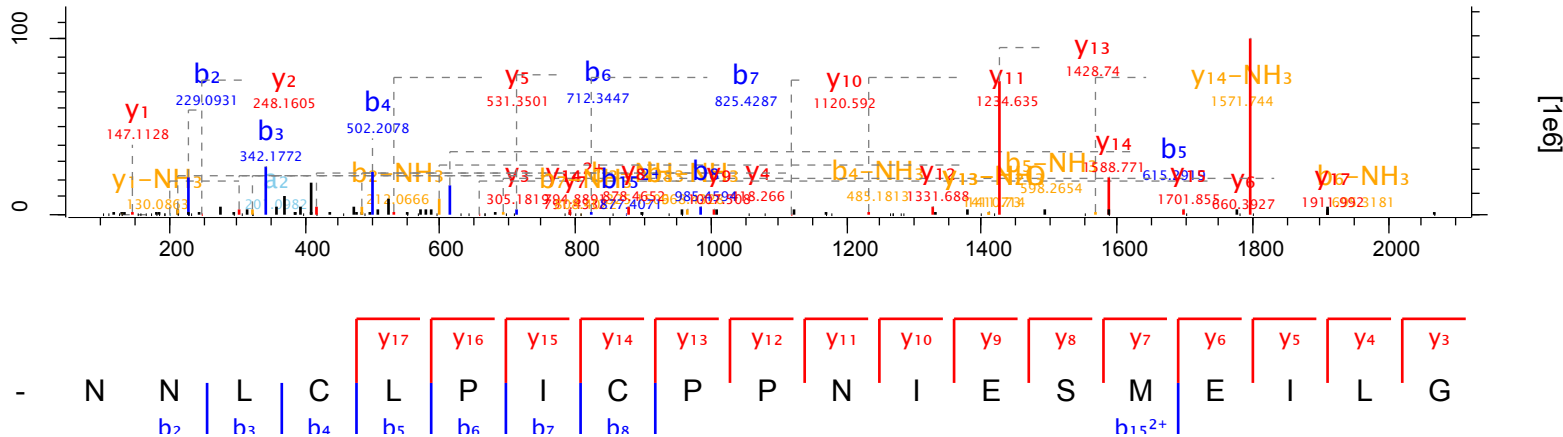



| Raw file                                      | Scan  | Method    | Score  | m/z    | Gene names |
|-----------------------------------------------|-------|-----------|--------|--------|------------|
| 20120706_EXQ2_AtDe_SA_WTR_OG_pooled_final_2_2 | 65140 | FTMS; HCD | 141.93 | 805.07 | Ly6a       |

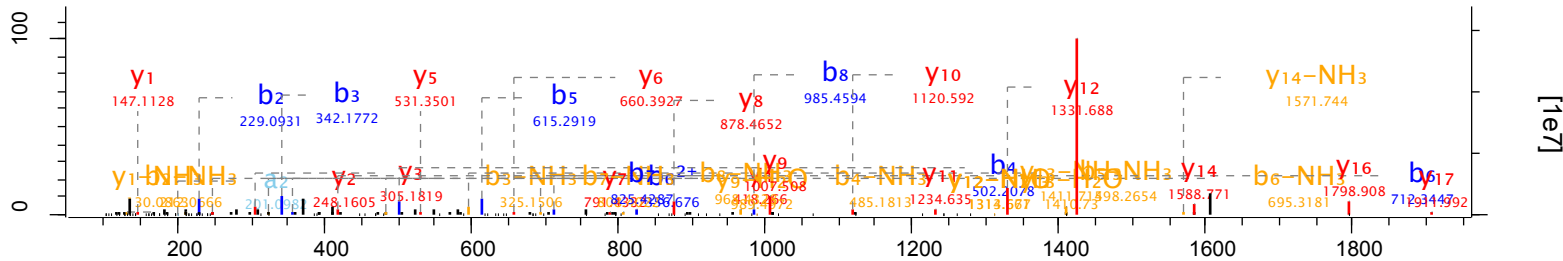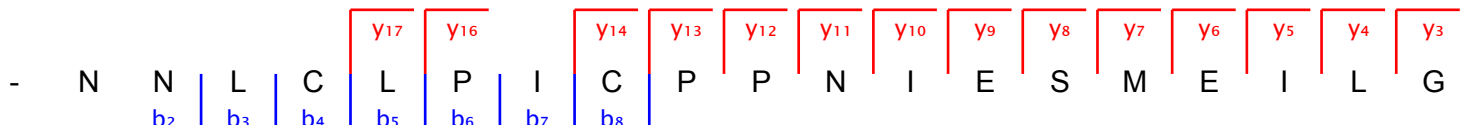

| Raw file                                      | Scan | Method    | Score  | m/z    | Gene names |
|-----------------------------------------------|------|-----------|--------|--------|------------|
| 20120706_EXQ2_AtDe_SA_WTR_OG_pooled_final_2_2 | 7276 | FTMS; HCD | 108.56 | 614.29 | Sepw1      |

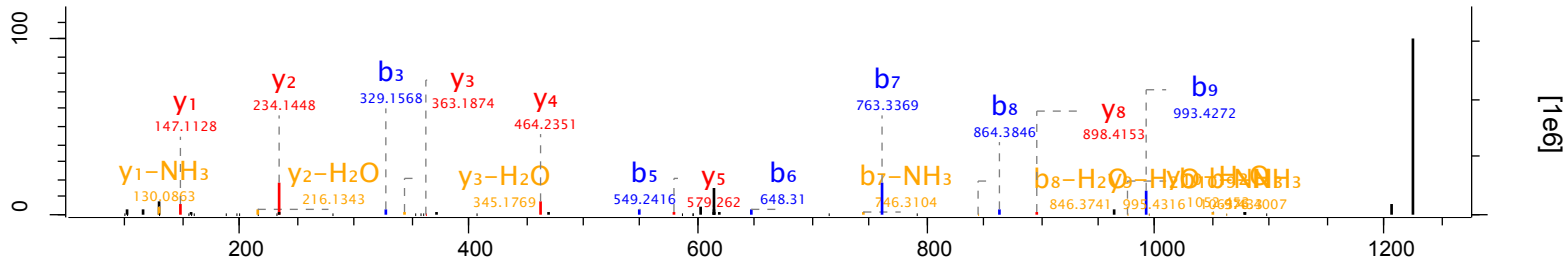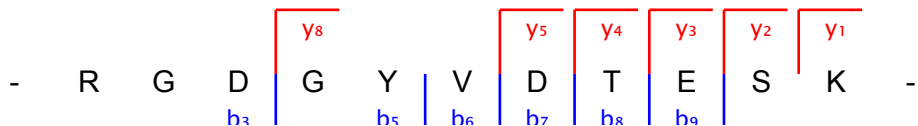

| Raw file                                      | Scan  | Method    | Score  | m/z   | Gene names |
|-----------------------------------------------|-------|-----------|--------|-------|------------|
| 20120706_EXQ2_AtDe_SA_WTR_OG_pooled_final_2_3 | 13945 | FTMS; HCD | 144.68 | 522.5 | Flg2       |

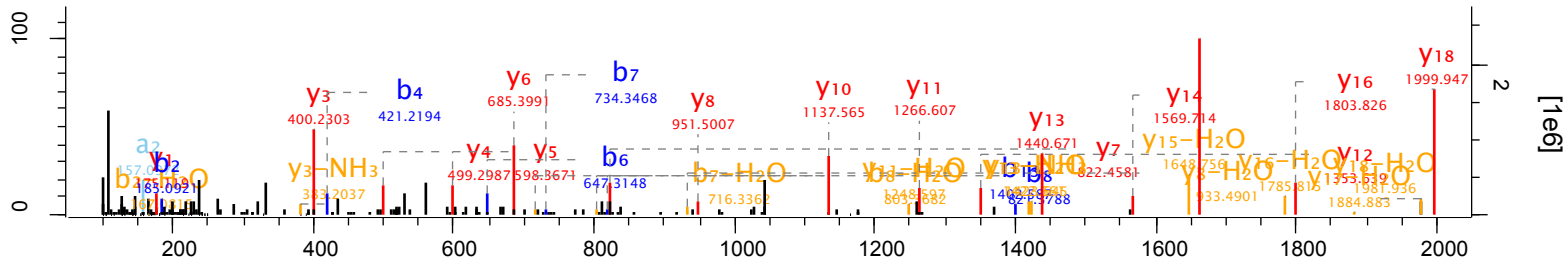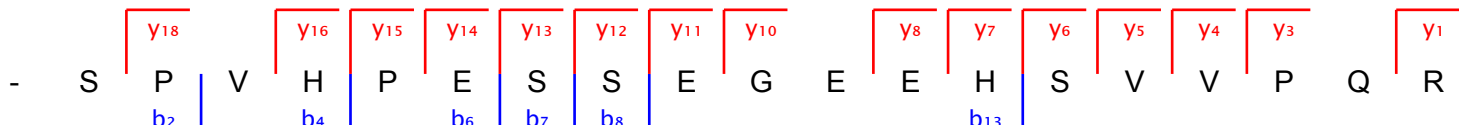

| Raw file                                      | Scan  | Method    | Score | m/z    | Gene names |
|-----------------------------------------------|-------|-----------|-------|--------|------------|
| 20120706_EXQ2_AtDe_SA_WTR_OG_pooled_final_2_3 | 13947 | FTMS; HCD | 80.54 | 696.33 | Flg2       |

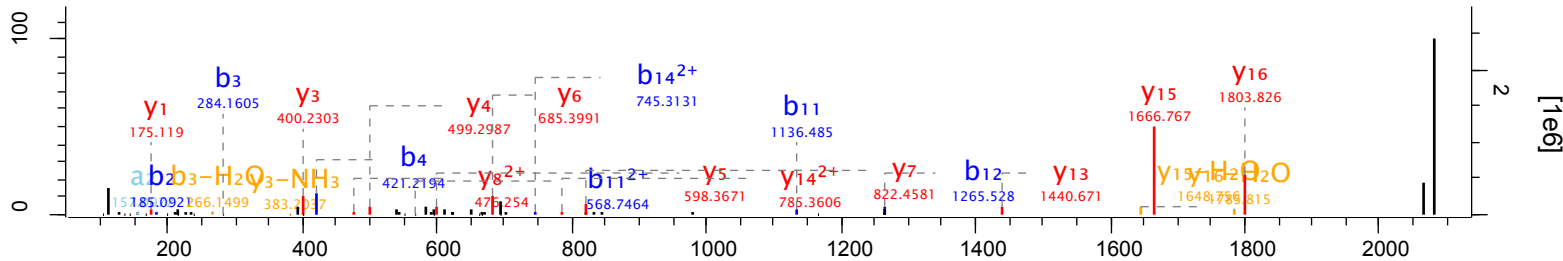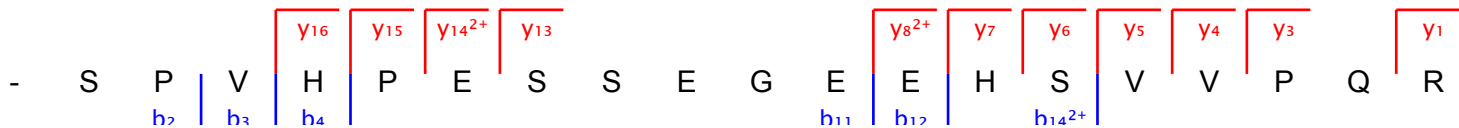

| Raw file                                      | Scan  | Method    | Score | m/z    | Gene names |
|-----------------------------------------------|-------|-----------|-------|--------|------------|
| 20120706_EXQ2_AtDe_SA_WTR_OG_pooled_final_2_3 | 21909 | FTMS; HCD | 51.47 | 695.69 | Slc45a4    |

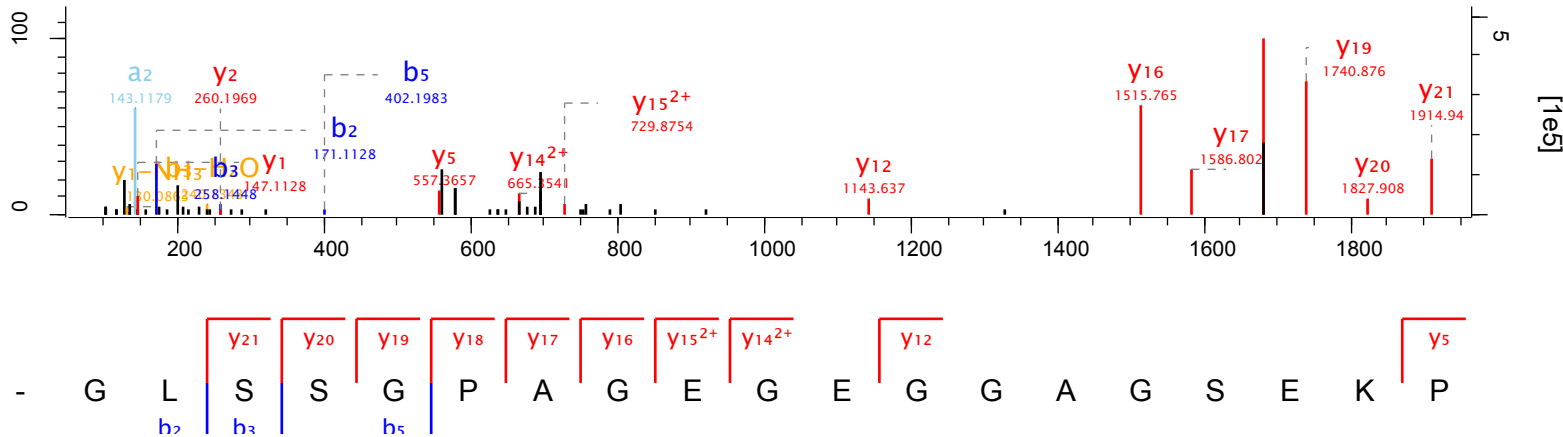

| Raw file                                      | Scan  | Method    | Score | m/z    | Gene names |
|-----------------------------------------------|-------|-----------|-------|--------|------------|
| 20120706_EXQ2_AtDe_SA_WTR_OG_pooled_final_2_3 | 38814 | FTMS; HCD | 97.46 | 479.26 | H2-Aa      |

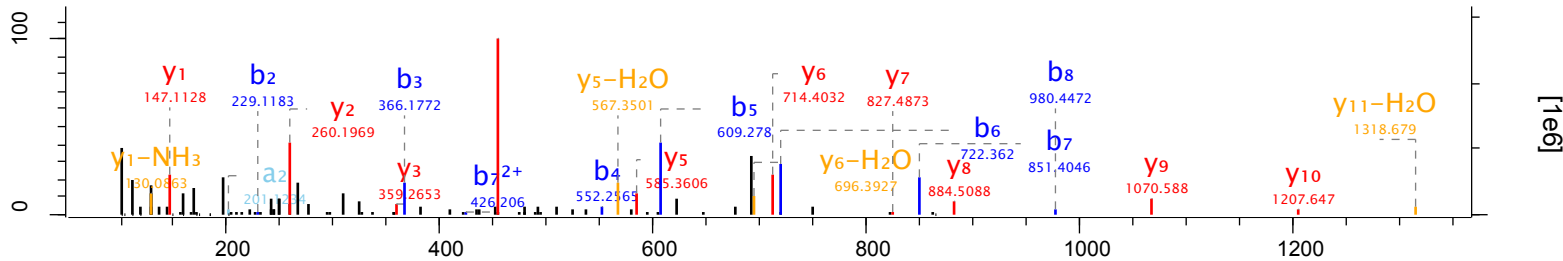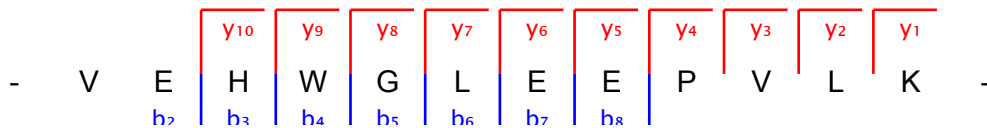

| Raw file                                      | Scan  | Method    | Score | m/z    | Gene names |
|-----------------------------------------------|-------|-----------|-------|--------|------------|
| 20120706_EXQ2_AtDe_SA_WTR_OG_pooled_final_2_3 | 47883 | FTMS; HCD | 36.66 | 577.81 | Sec1415    |

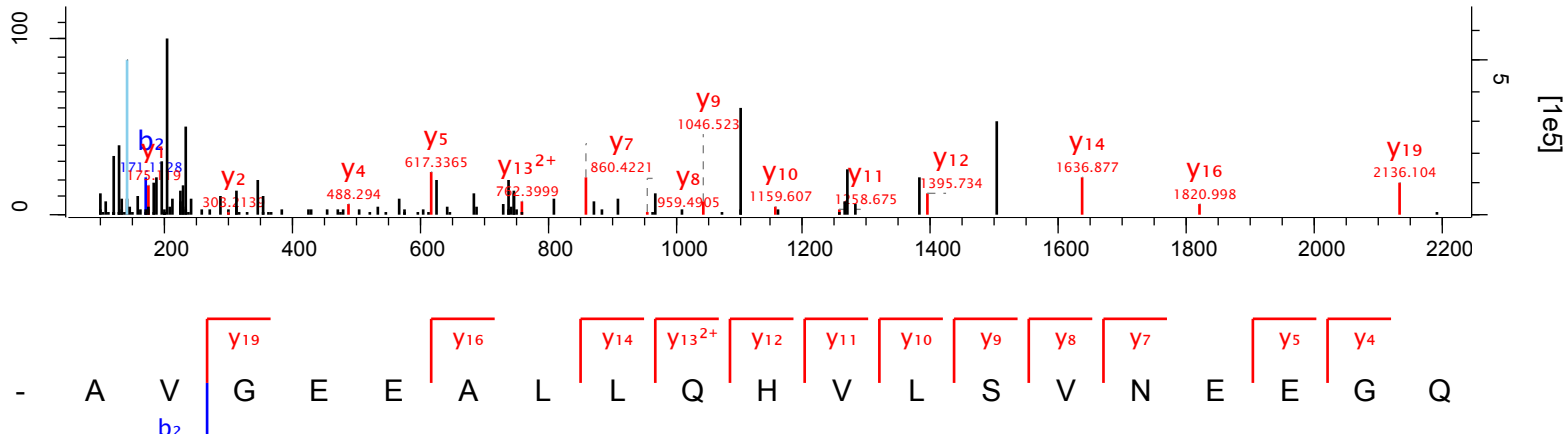

| Raw file                                      | Scan  | Method    | Score | m/z    | Gene names |
|-----------------------------------------------|-------|-----------|-------|--------|------------|
| 20120706_EXQ2_AtDe_SA_WTR_OG_pooled_final_2_3 | 59216 | FTMS; HCD | 29.45 | 617.81 | Dusp26     |

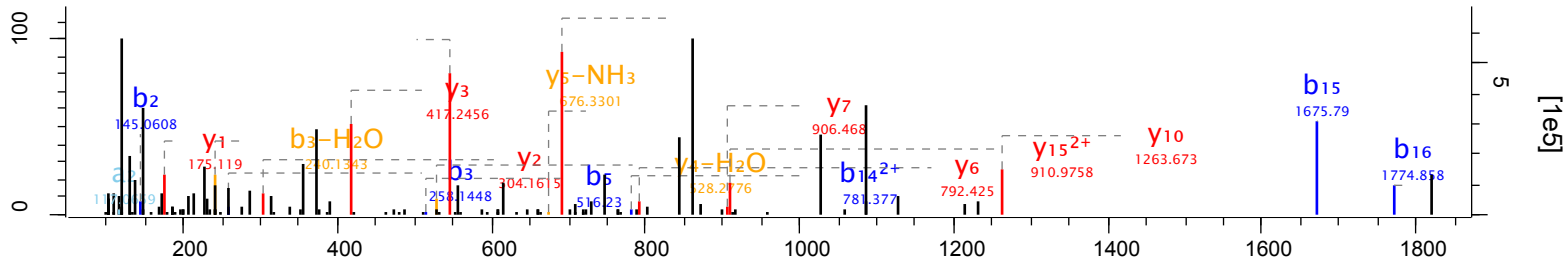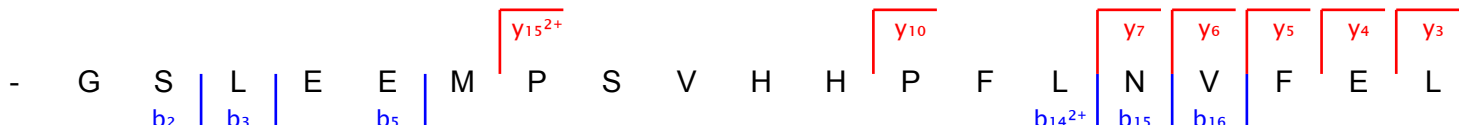



| Raw file                                      | Scan  | Method    | Score | m/z    | Gene names |
|-----------------------------------------------|-------|-----------|-------|--------|------------|
| 20120706_EXQ2_AtDe_SA_WTR_OG_pooled_final_2_4 | 17390 | FTMS; HCD | 45.28 | 657.82 | C5ar1      |

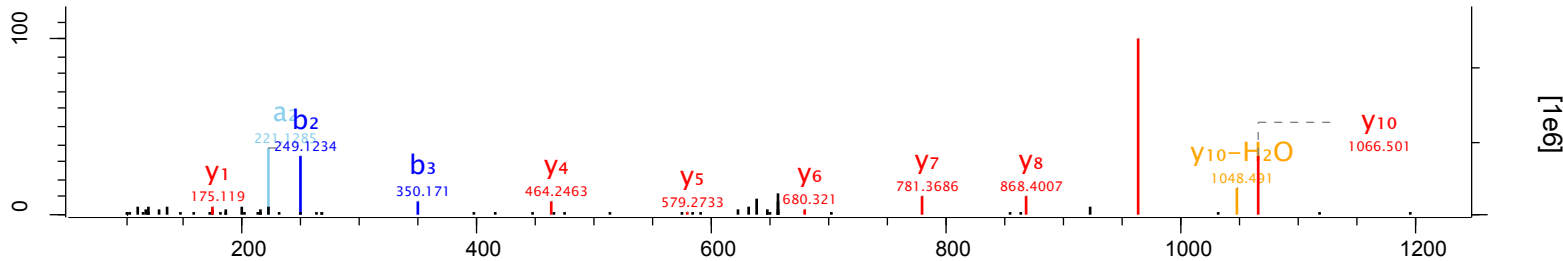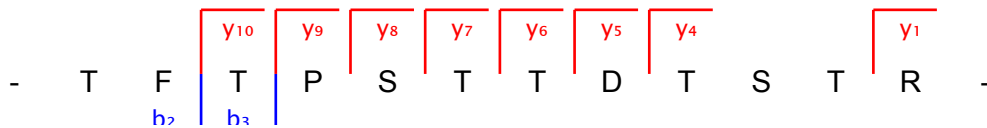

| Raw file                                      | Scan  | Method    | Score  | m/z    | Gene names |
|-----------------------------------------------|-------|-----------|--------|--------|------------|
| 20120706_EXQ2_AtDe_SA_WTR_OG_pooled_final_2_4 | 23095 | FTMS; HCD | 120.06 | 597.34 | Apoa2      |

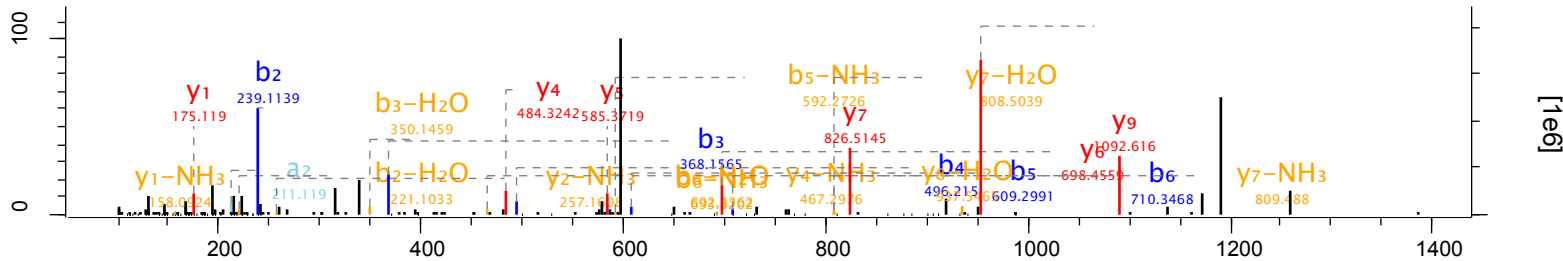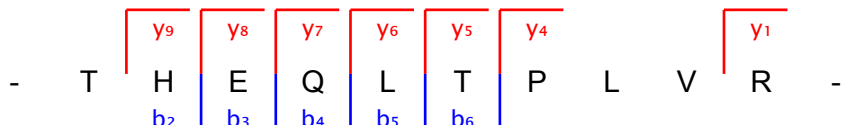

| Raw file                                      | Scan  | Method    | Score | m/z    | Gene names |
|-----------------------------------------------|-------|-----------|-------|--------|------------|
| 20120706_EXQ2_AtDe_SA_WTR_OG_pooled_final_2_4 | 23118 | FTMS; HCD | 85.15 | 398.56 | Apoa2      |

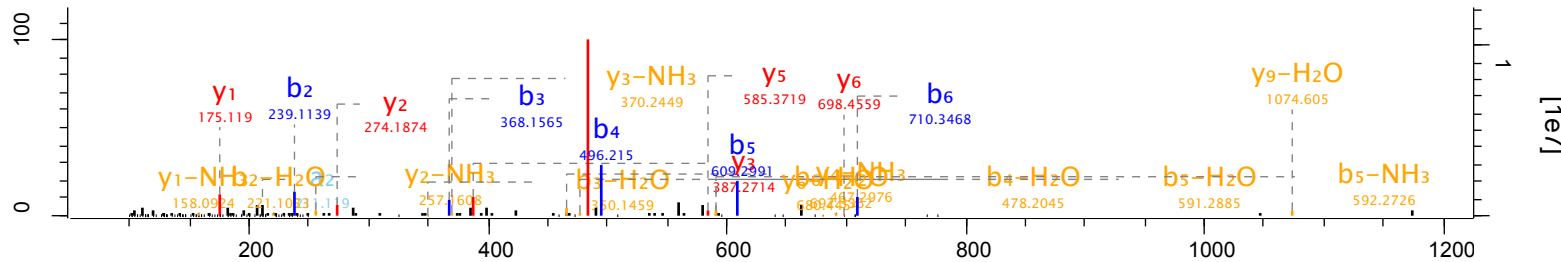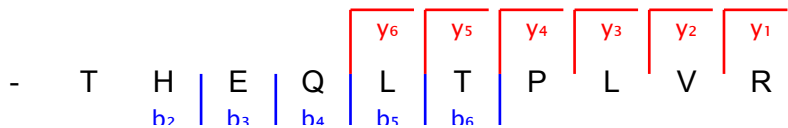

| Raw file                                      | Scan  | Method    | Score | m/z   | Gene names     |
|-----------------------------------------------|-------|-----------|-------|-------|----------------|
| 20120706_EXQ2_AtDe_SA_WTR_OG_pooled_final_2_4 | 27639 | FTMS; HCD | 60.31 | 920.9 | Krtap3-1;Krtap |

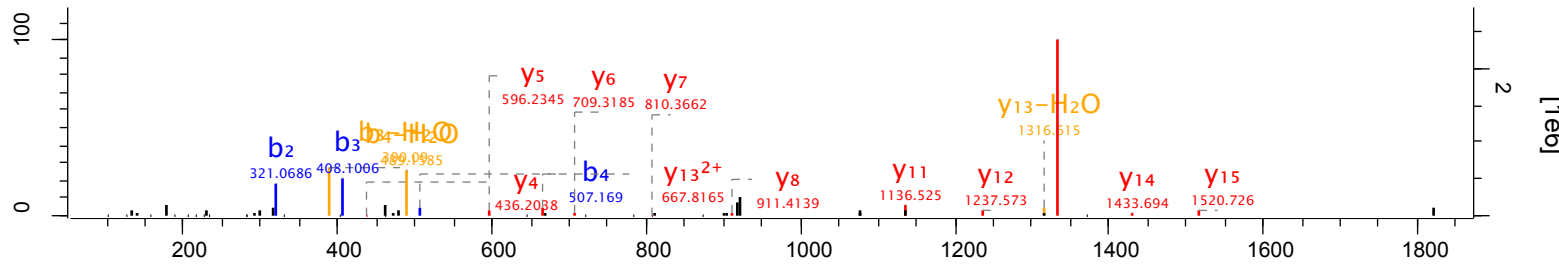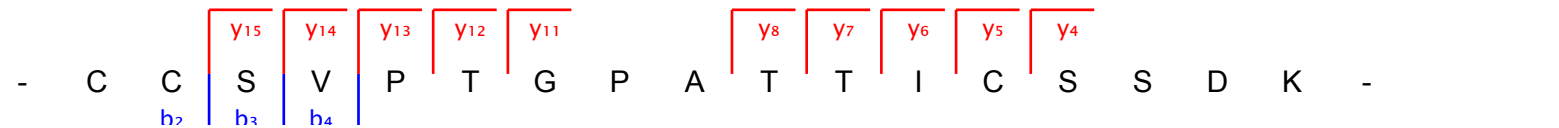

| Raw file                                      | Scan  | Method    | Score | m/z    | Gene names        |
|-----------------------------------------------|-------|-----------|-------|--------|-------------------|
| 20120706_EXQ2_AtDe_SA_WTR_OG_pooled_final_2_4 | 27730 | FTMS; HCD | 83.37 | 614.27 | Krtap3-1;Krtap3-1 |

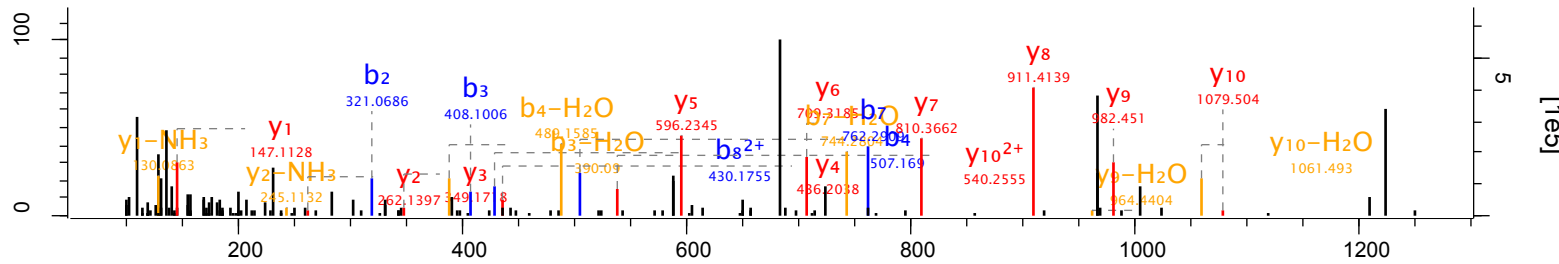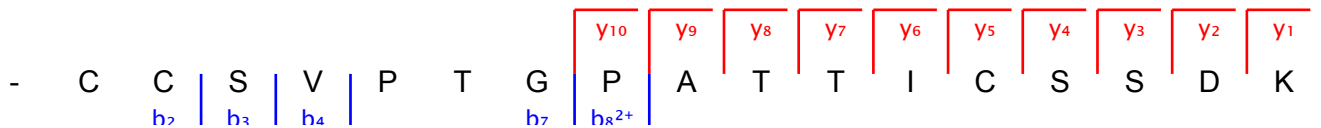

| Raw file                                      | Scan  | Method    | Score | m/z     | Gene name |
|-----------------------------------------------|-------|-----------|-------|---------|-----------|
| 20120706_EXQ2_AtDe_SA_WTR_OG_pooled_final_2_4 | 53678 | FTMS; HCD | 37.82 | 1020.55 | Eva1b     |

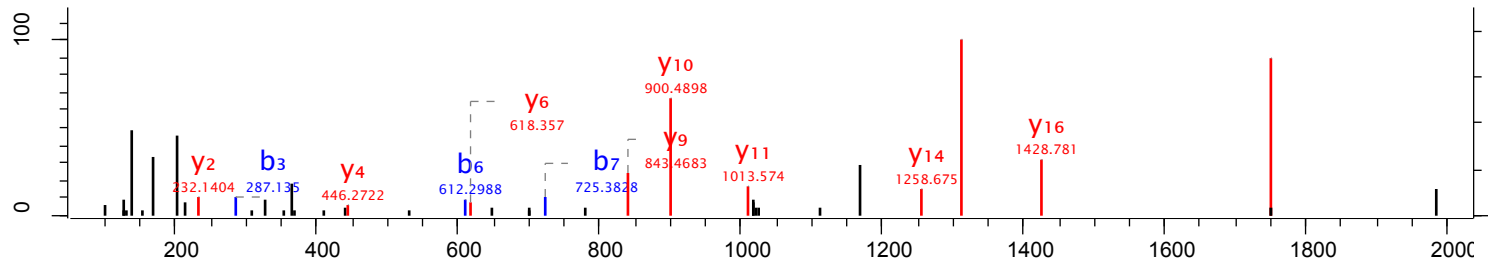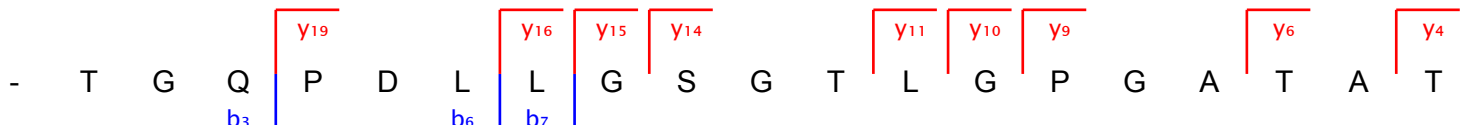

Raw file

Scan

Method

Score

m/z

20120706\_EXQ2\_AtDe\_SA\_WTR\_OG\_pooled\_final\_2\_4

58617

FTMS; HCD

42.95

859.98

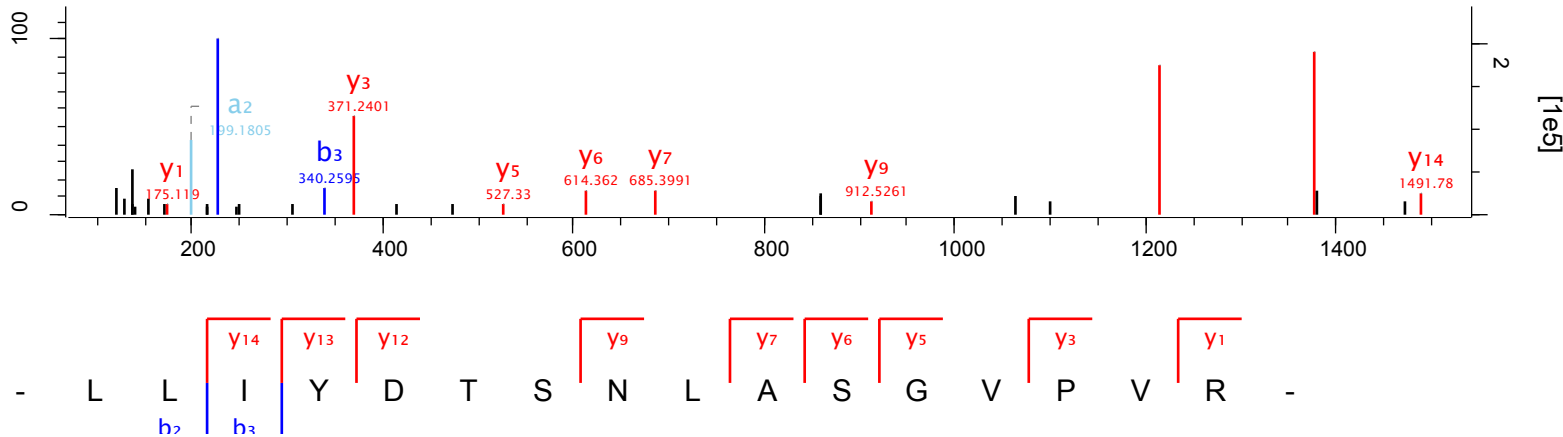

Raw file

20120706\_EXQ2\_AtDe\_SA\_WTR\_OG\_pooled\_final\_2\_4

Scan

60258

Method

FTMS; HCD

Score

75.82

m/z

635.85

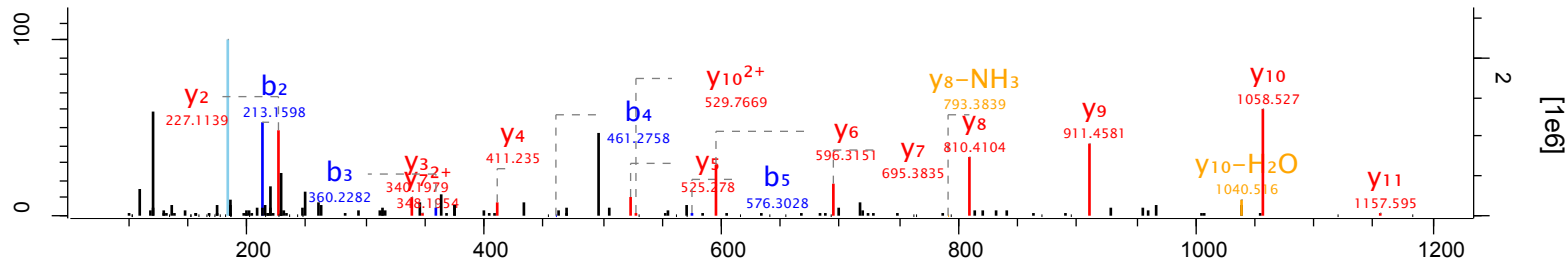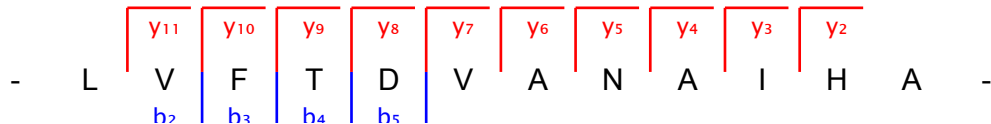



| Raw file                                      | Scan  | Method    | Score | m/z    | Gene names |
|-----------------------------------------------|-------|-----------|-------|--------|------------|
| 20120706_EXQ2_AtDe_SA_WTR_OG_pooled_final_2_4 | 61459 | FTMS; HCD | 85.49 | 813.46 | Plac8      |

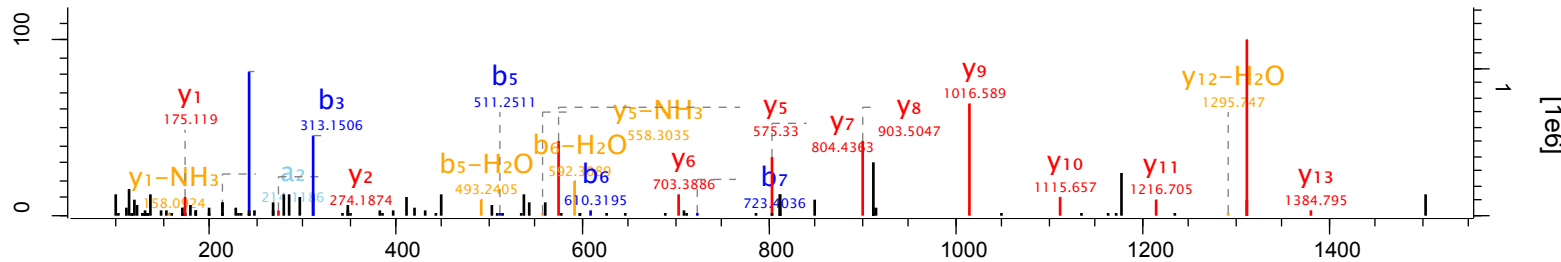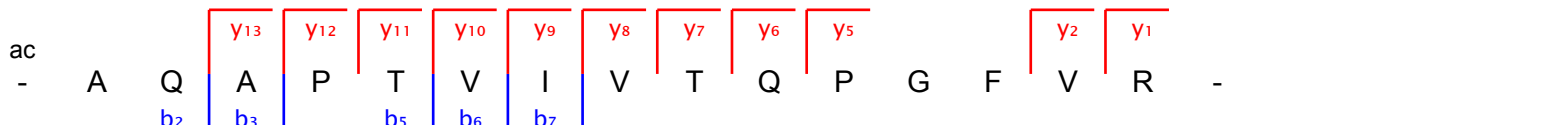

| Raw file                                      | Scan  | Method    | Score | m/z    | Gene names |
|-----------------------------------------------|-------|-----------|-------|--------|------------|
| 20120706_EXQ2_AtDe_SA_WTR_OG_pooled_final_2_4 | 66593 | FTMS; HCD | 65.84 | 716.41 | Uqcr11     |

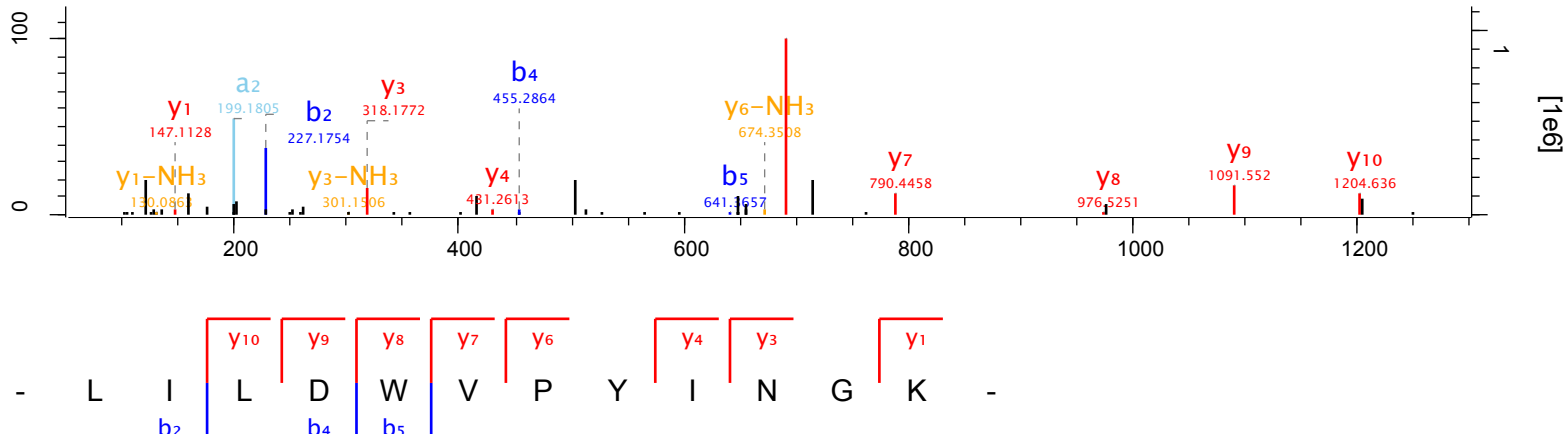

| Raw file                                      | Scan  | Method    | Score | m/z   | Gene names |
|-----------------------------------------------|-------|-----------|-------|-------|------------|
| 20120706_EXQ2_AtDe_SA_WTR_OG_pooled_final_2_5 | 14743 | FTMS; HCD | 86.77 | 627.3 | Dbnidd2    |

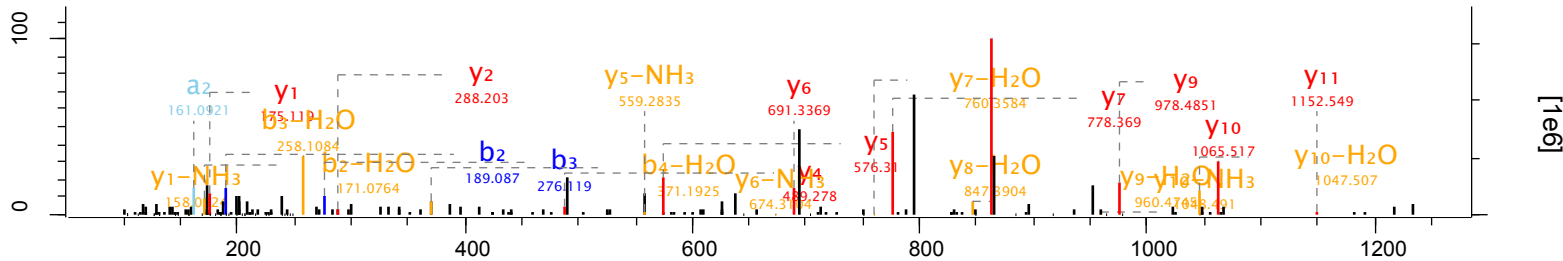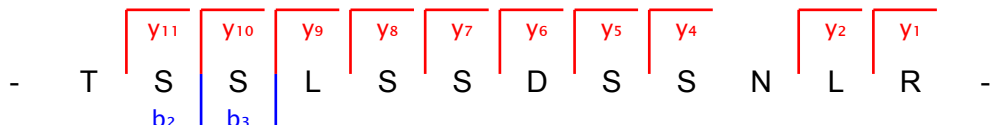

| Raw file                                      | Scan  | Method    | Score | m/z    | Gene names |
|-----------------------------------------------|-------|-----------|-------|--------|------------|
| 20120706_EXQ2_AtDe_SA_WTR_OG_pooled_final_2_5 | 16132 | FTMS; HCD | 76.73 | 464.22 | Myadml2    |

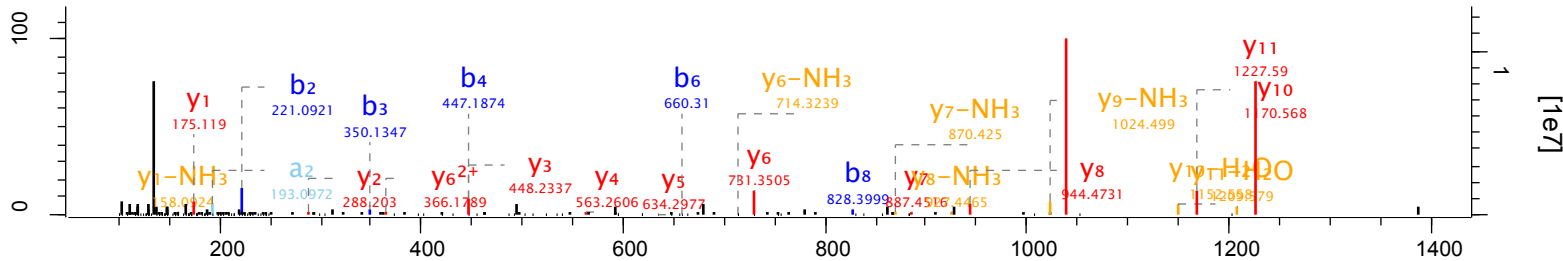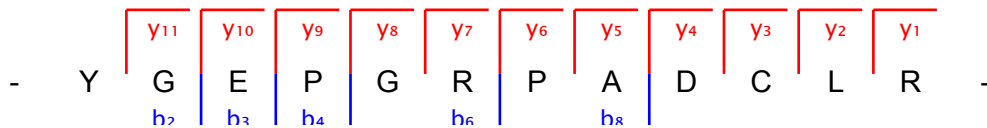

| Raw file                                      | Scan  | Method    | Score | m/z    | Gene names |
|-----------------------------------------------|-------|-----------|-------|--------|------------|
| 20120706_EXQ2_AtDe_SA_WTR_OG_pooled_final_2_5 | 19389 | FTMS; HCD | 66.07 | 460.24 | AI481877   |

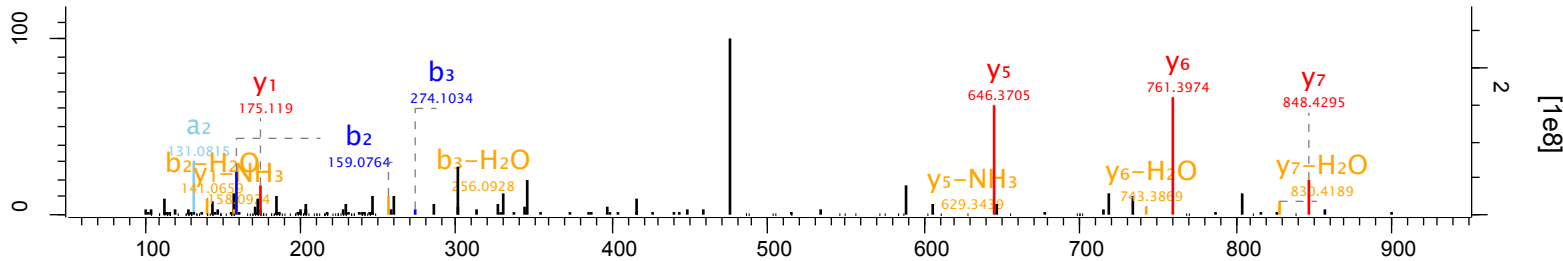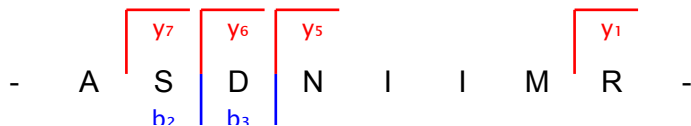

| Raw file                                      | Scan  | Method    | Score | m/z    | Gene names |
|-----------------------------------------------|-------|-----------|-------|--------|------------|
| 20120706_EXQ2_AtDe_SA_WTR_OG_pooled_final_2_5 | 25862 | FTMS; HCD | 67.08 | 542.59 | Dnlz       |

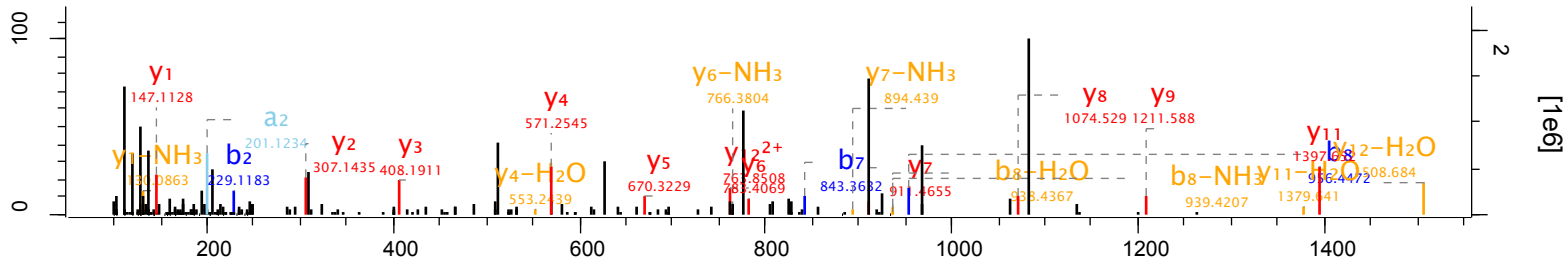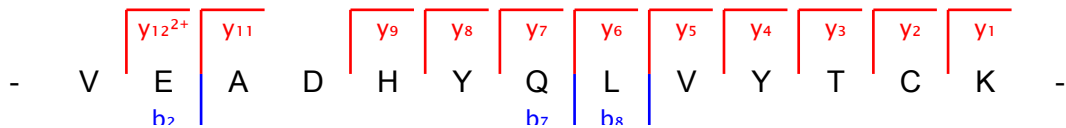

| Raw file                                      | Scan  | Method    | Score | m/z   | Gene names     |
|-----------------------------------------------|-------|-----------|-------|-------|----------------|
| 20120706_EXQ2_AtDe_SA_WTR_OG_pooled_final_2_5 | 26009 | FTMS; HCD | 69.81 | 921.4 | Krtap3-1;Krtap |

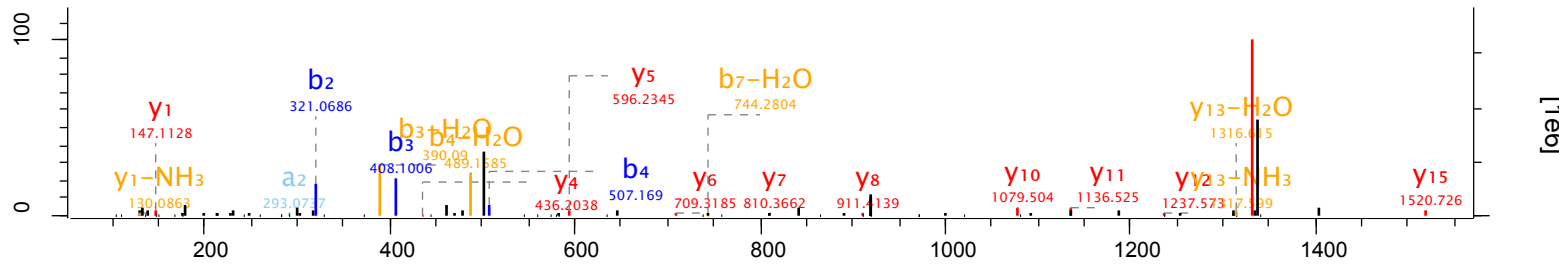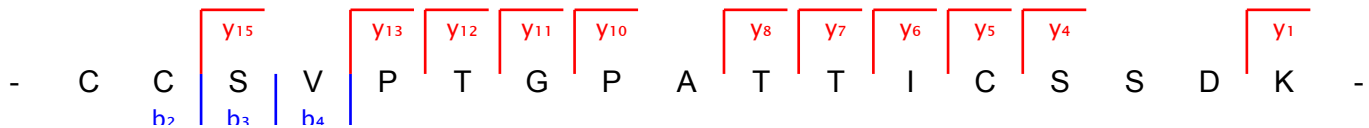

| Raw file                                      | Scan  | Method    | Score | m/z   | Gene names |
|-----------------------------------------------|-------|-----------|-------|-------|------------|
| 20120706_EXQ2_AtDe_SA_WTR_OG_pooled_final_2_5 | 27385 | FTMS; HCD | 97.73 | 745.9 | Abcc12     |

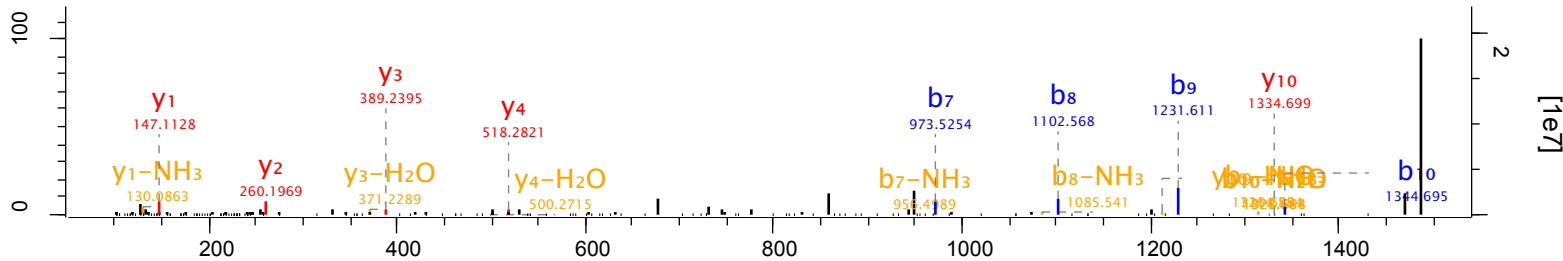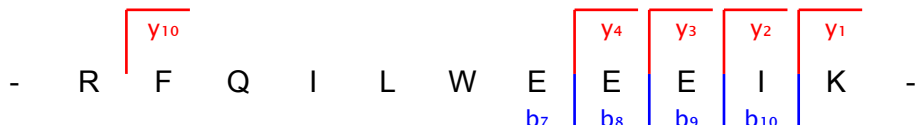



| Raw file                                      | Scan  | Method    | Score | m/z    | Gene names |
|-----------------------------------------------|-------|-----------|-------|--------|------------|
| 20120706_EXQ2_AtDe_SA_WTR_OG_pooled_final_2_5 | 28658 | FTMS; HCD | 93.65 | 705.83 | Vkorc1     |

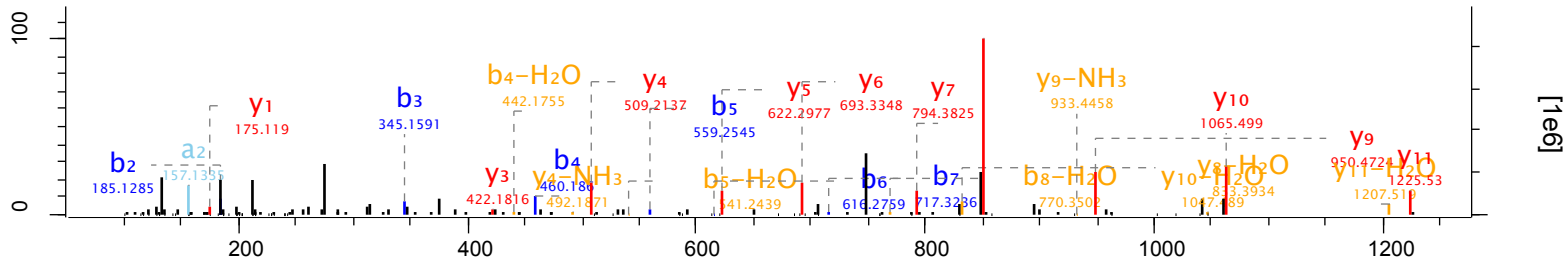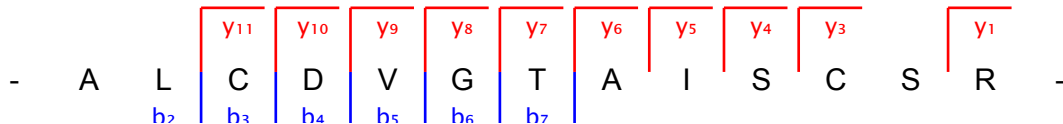

| Raw file                                      | Scan  | Method    | Score | m/z    | Gene names |
|-----------------------------------------------|-------|-----------|-------|--------|------------|
| 20120706_EXQ2_AtDe_SA_WTR_OG_pooled_final_2_5 | 31274 | FTMS; HCD | 66.06 | 761.87 | Mbl2       |

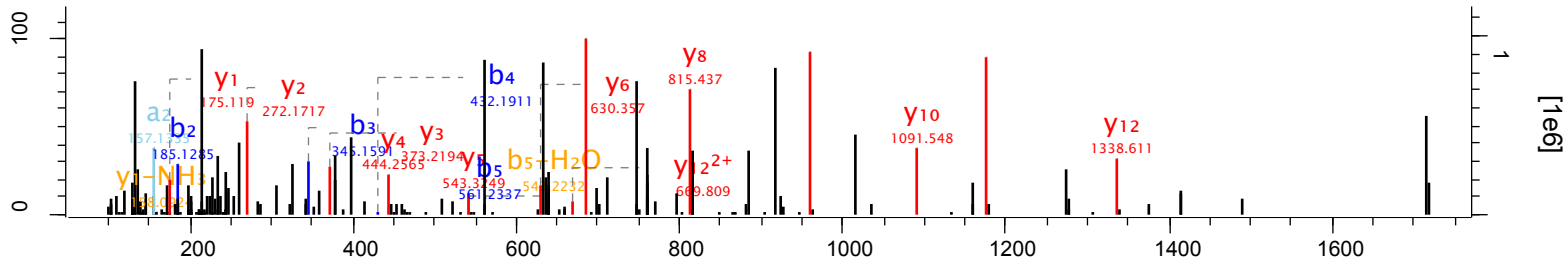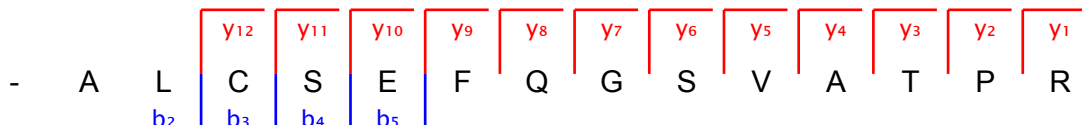

| Raw file                                      | Scan  | Method    | Score | m/z    | Gene names |
|-----------------------------------------------|-------|-----------|-------|--------|------------|
| 20120706_EXQ2_AtDe_SA_WTR_OG_pooled_final_2_5 | 36941 | FTMS; HCD | 58.32 | 688.35 | 2010107G23 |

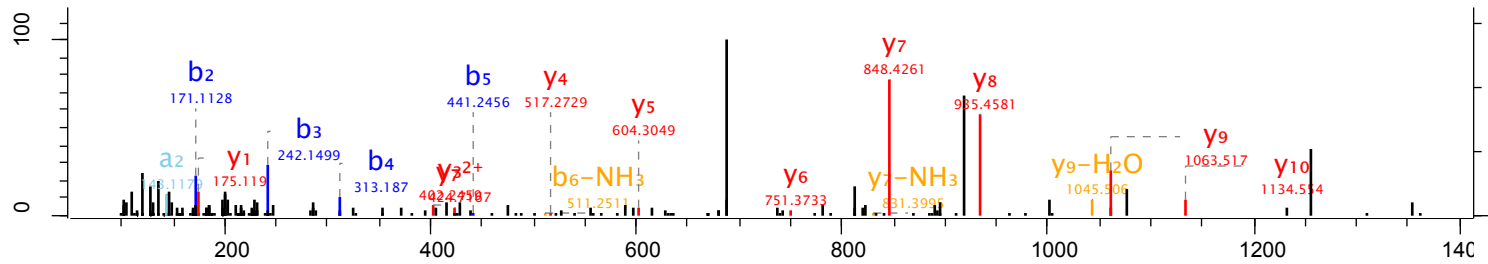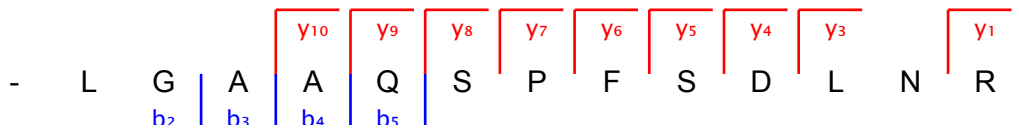

| Raw file                                      | Scan  | Method    | Score | m/z    | Gene names |
|-----------------------------------------------|-------|-----------|-------|--------|------------|
| 20120706_EXQ2_AtDe_SA_WTR_OG_pooled_final_2_5 | 41377 | FTMS; HCD | 92.78 | 784.36 | Coa6       |

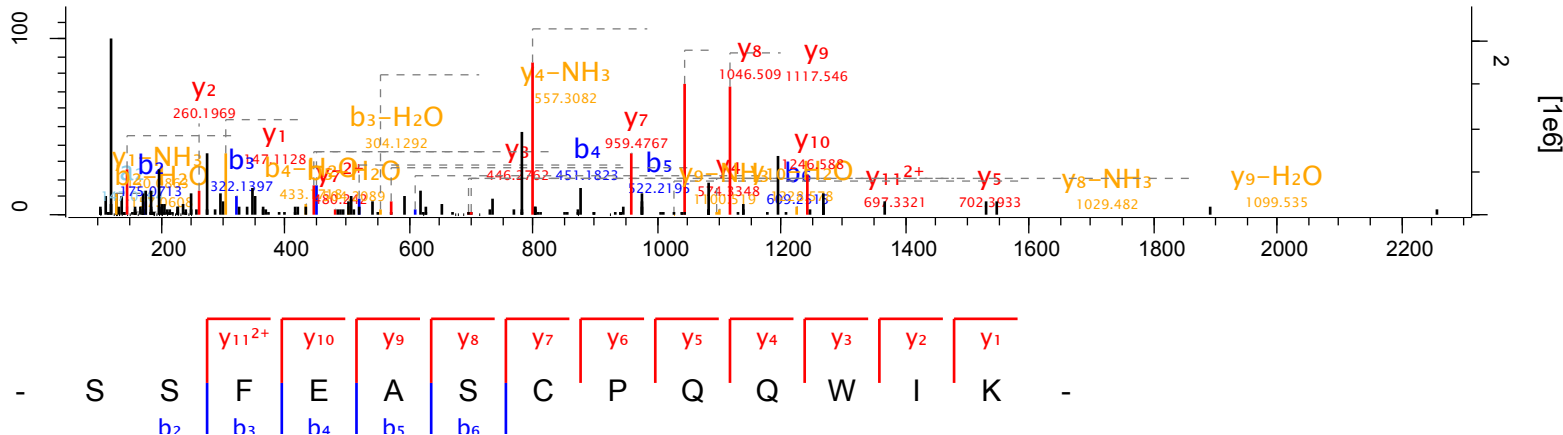

Raw file

20120706\_EXQ2\_AtDe\_SA\_WTR\_OG\_pooled\_final\_2\_5

Scan

44607

Method

FTMS; HCD

Score

114.86

m/z

619.34

Gene names

Tmem69

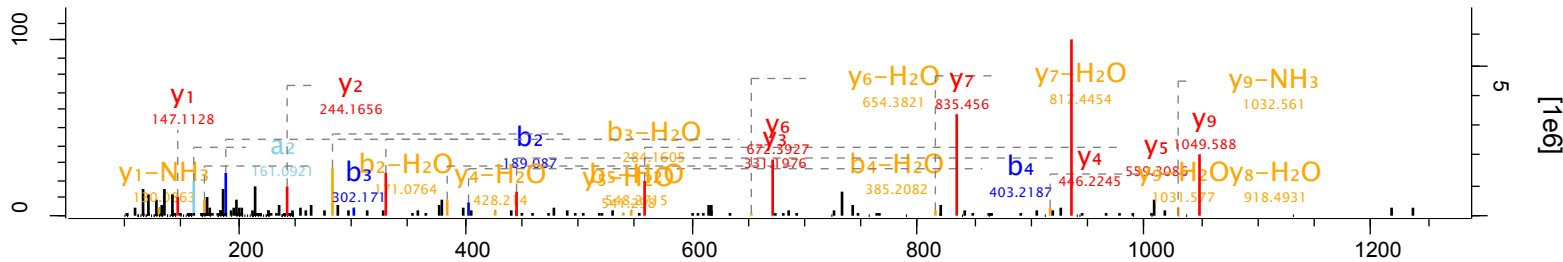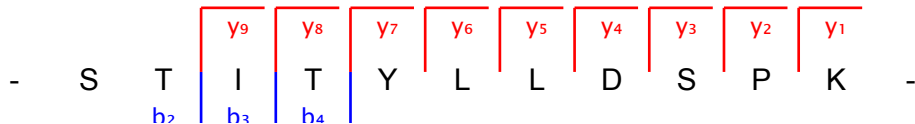

| Raw file                                      | Scan  | Method    | Score  | m/z   | Gene names |
|-----------------------------------------------|-------|-----------|--------|-------|------------|
| 20120706_EXQ2_AtDe_SA_WTR_OG_pooled_final_2_5 | 46287 | FTMS; HCD | 138.19 | 807.9 | Aqp7       |

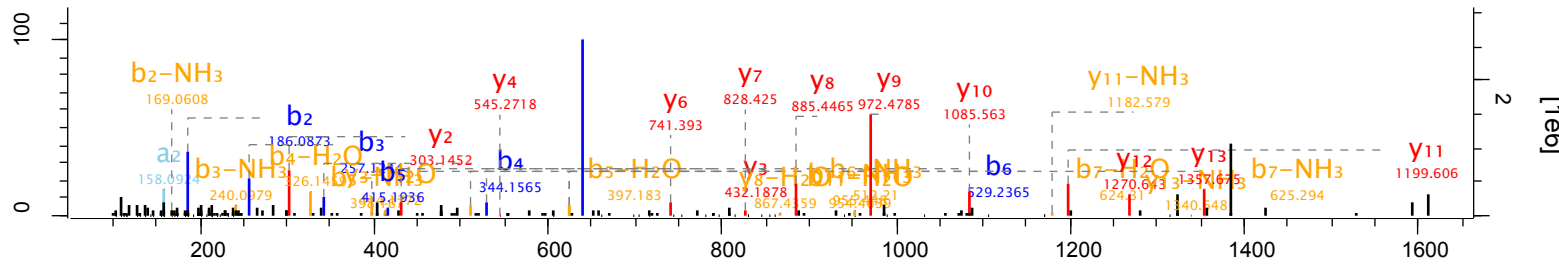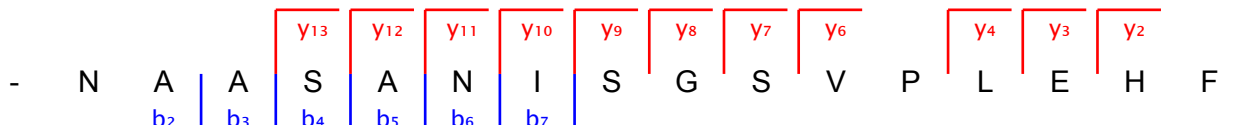

| Raw file                                      | Scan  | Method    | Score  | m/z   | Gene names |
|-----------------------------------------------|-------|-----------|--------|-------|------------|
| 20120706_EXQ2_AtDe_SA_WTR_OG_pooled_final_2_5 | 46300 | FTMS; HCD | 153.23 | 807.4 | Aqp7       |

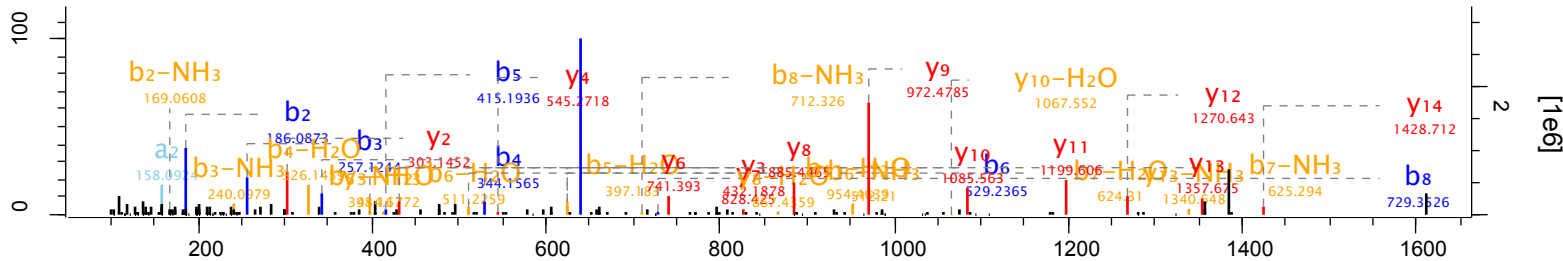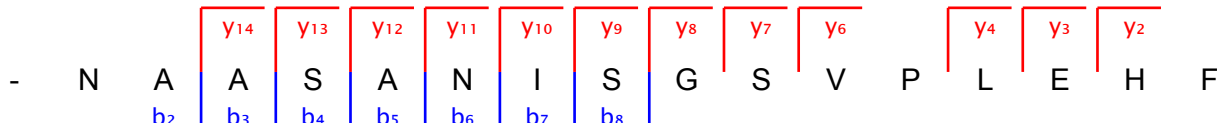

| Raw file                                      | Scan  | Method    | Score | m/z    | Gene names |
|-----------------------------------------------|-------|-----------|-------|--------|------------|
| 20120706_EXQ2_AtDe_SA_WTR_OG_pooled_final_2_5 | 48639 | FTMS; HCD | 94.61 | 638.66 | Tusc5      |

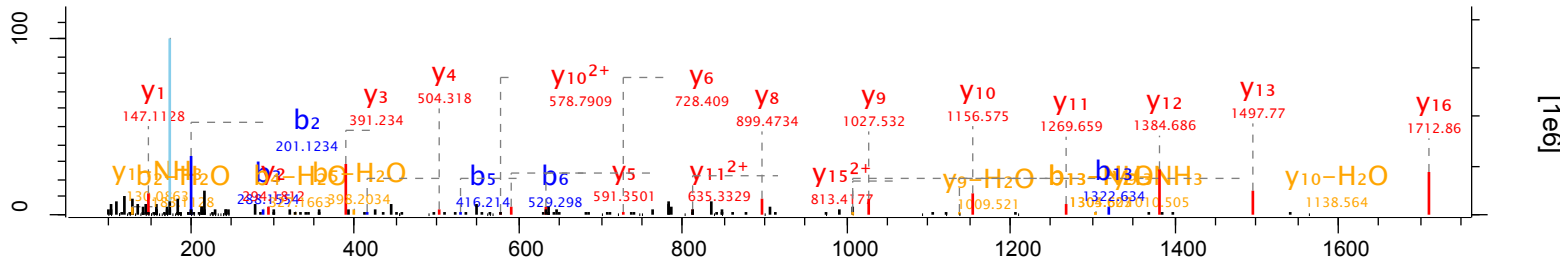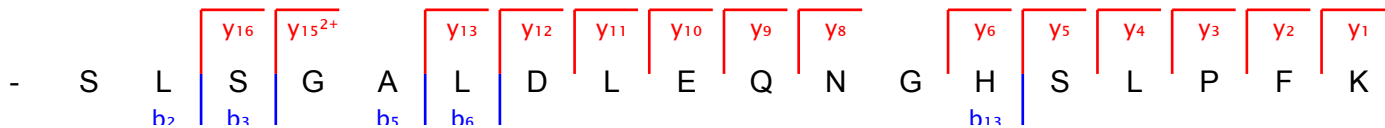



| Raw file                                      | Scan  | Method    | Score | m/z     | Gene name |
|-----------------------------------------------|-------|-----------|-------|---------|-----------|
| 20120706_EXQ2_AtDe_SA_WTR_OG_pooled_final_2_5 | 52302 | FTMS; HCD | 81.48 | 1020.54 | Eva1b     |

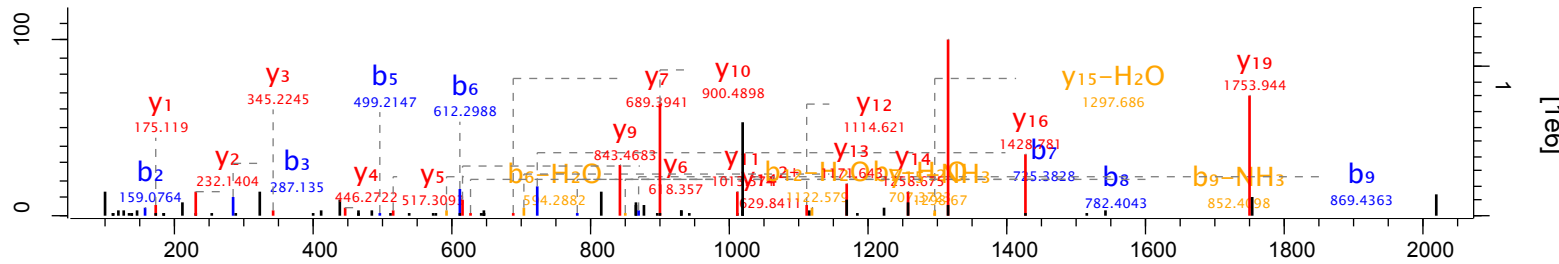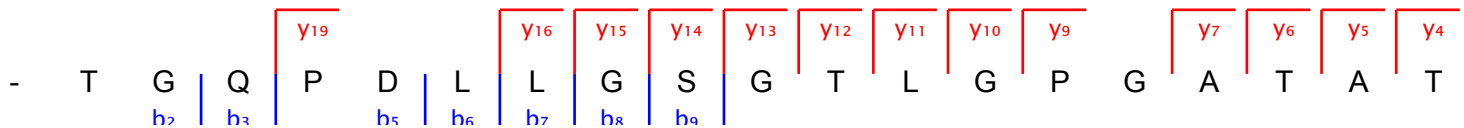

| Raw file                                      | Scan  | Method    | Score | m/z   | Gene names |
|-----------------------------------------------|-------|-----------|-------|-------|------------|
| 20120706_EXQ2_AtDe_SA_WTR_OG_pooled_final_2_5 | 54232 | FTMS; HCD | 89.01 | 759.7 | Cnih4      |

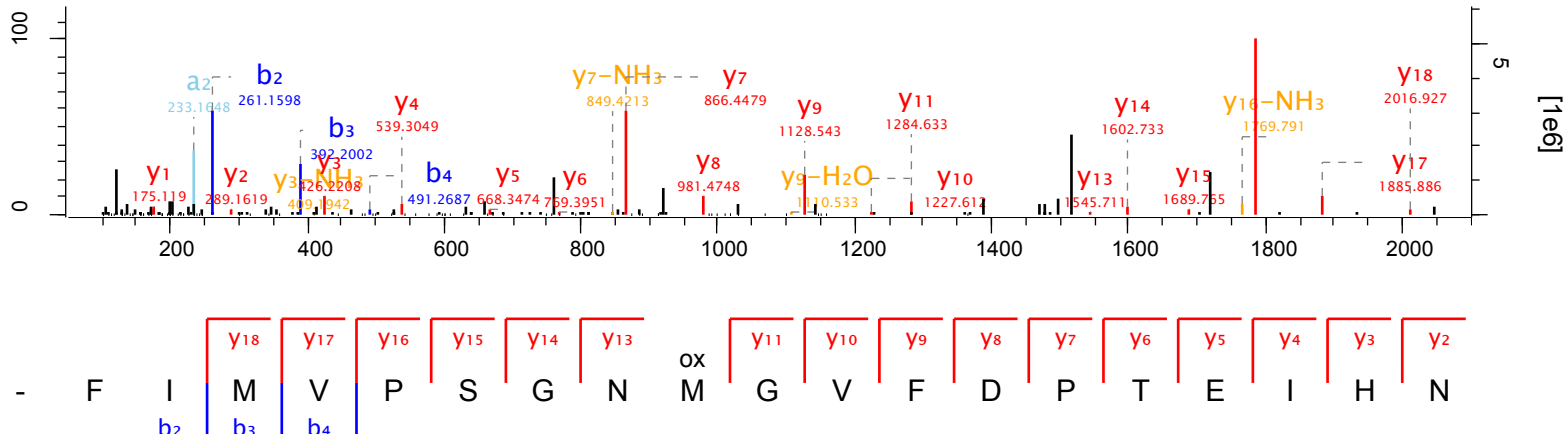

| Raw file                                      | Scan  | Method    | Score | m/z    | Gene names |
|-----------------------------------------------|-------|-----------|-------|--------|------------|
| 20120706_EXQ2_AtDe_SA_WTR_OG_pooled_final_2_5 | 57309 | FTMS; HCD | 76.3  | 760.04 | Cnih4      |

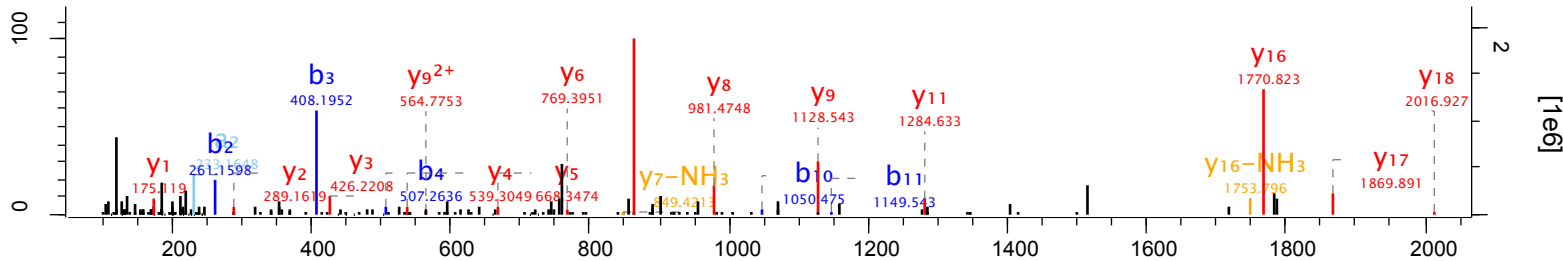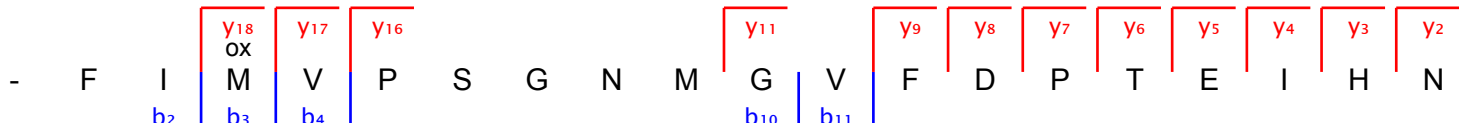

| Raw file                                      | Scan  | Method    | Score | m/z     | Gene name |
|-----------------------------------------------|-------|-----------|-------|---------|-----------|
| 20120706_EXQ2_AtDe_SA_WTR_OG_pooled_final_2_5 | 57379 | FTMS; HCD | 94.28 | 1139.55 | Cnih4     |

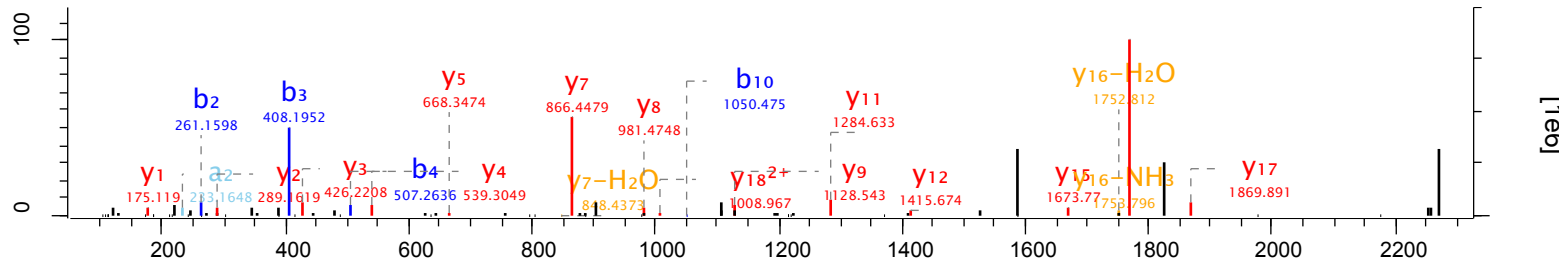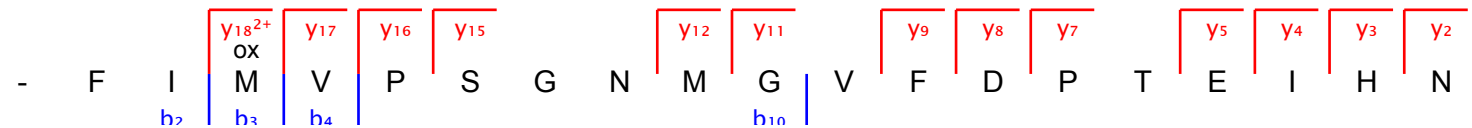

Raw file

Scan

Method

Score

m/z

20120706\_EXQ2\_AtDe\_SA\_WTR\_OG\_pooled\_final\_2\_5

57504

FTMS; HCD

171.46

859.48

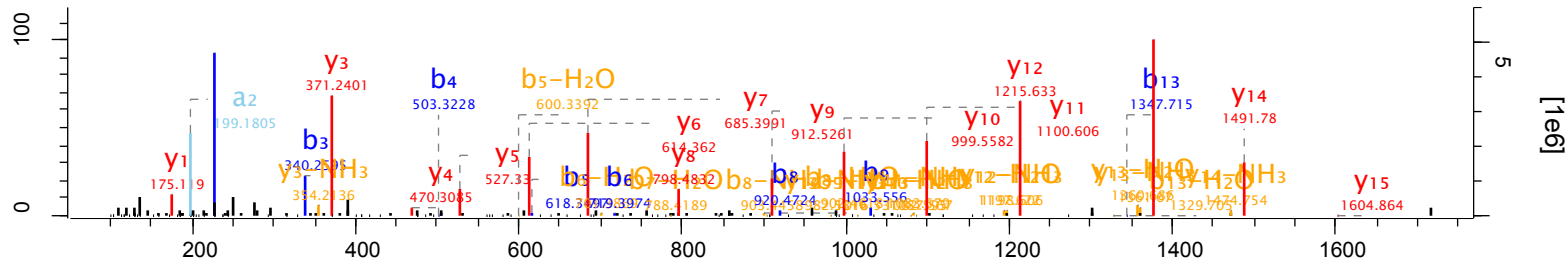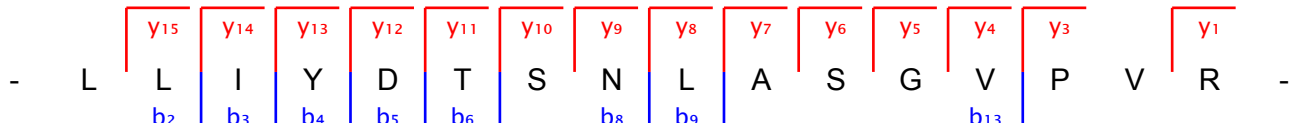

| Raw file                                      | Scan  | Method    | Score | m/z    | Gene names |
|-----------------------------------------------|-------|-----------|-------|--------|------------|
| 20120706_EXQ2_AtDe_SA_WTR_OG_pooled_final_2_5 | 57871 | FTMS; HCD | 63.62 | 626.82 | Ag2        |

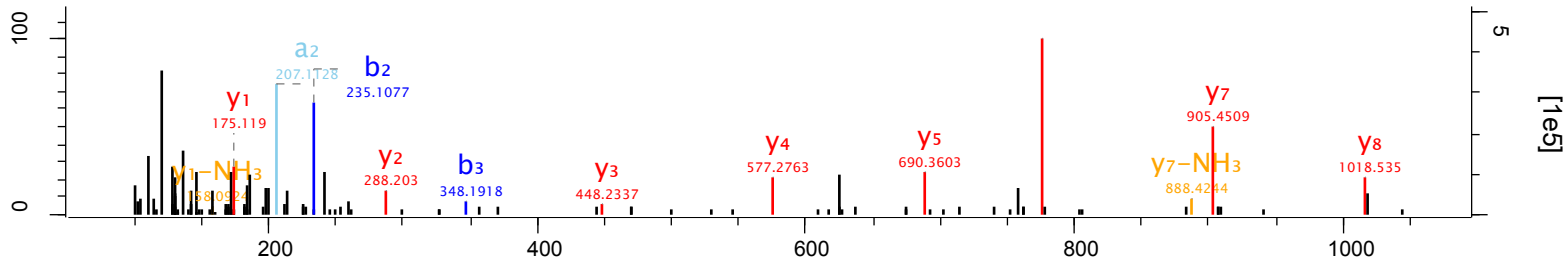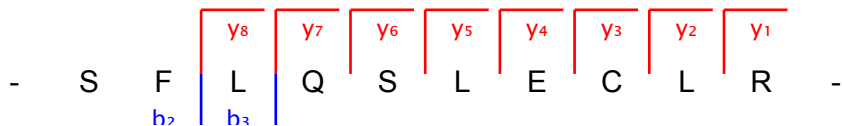

| Raw file                                      | Scan  | Method    | Score | m/z   | Gene names |
|-----------------------------------------------|-------|-----------|-------|-------|------------|
| 20120706_EXQ2_AtDe_SA_WTR_OG_pooled_final_2_5 | 58391 | FTMS; HCD | 49.12 | 844.4 | Klhl33     |

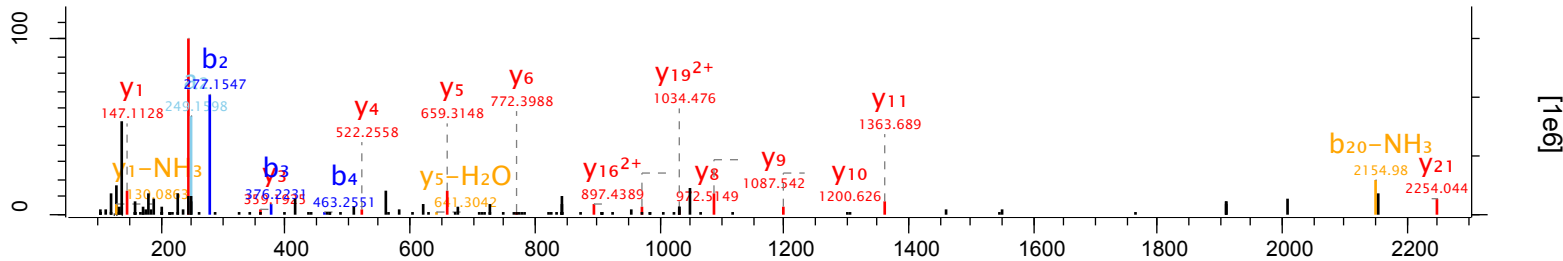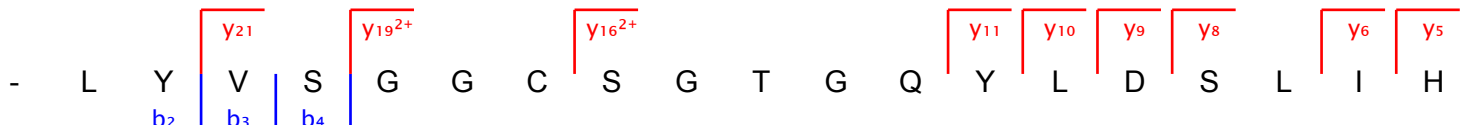

Raw file

Scan

Method

Score

m/z

20120706\_EXQ2\_AtDe\_SA\_WTR\_OG\_pooled\_final\_2\_5

59133

FTMS; HCD

77.67

635.85

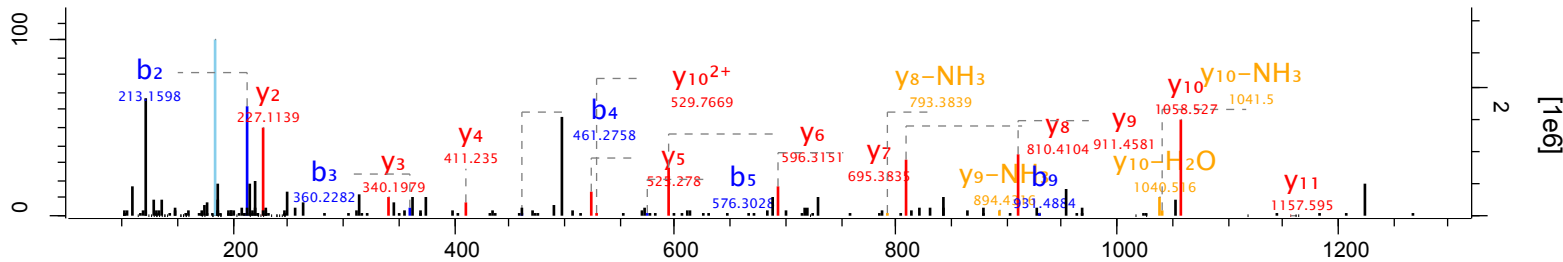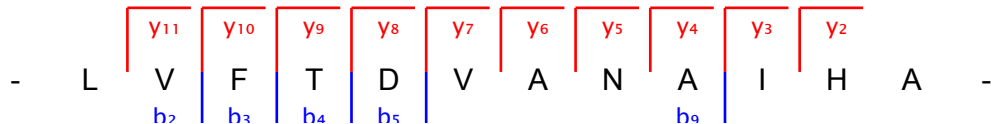



| Raw file                                      | Scan  | Method    | Score | m/z    | Gene names |
|-----------------------------------------------|-------|-----------|-------|--------|------------|
| 20120706_EXQ2_AtDe_SA_WTR_OG_pooled_final_2_5 | 60233 | FTMS; HCD | 99.54 | 991.85 | Bad        |

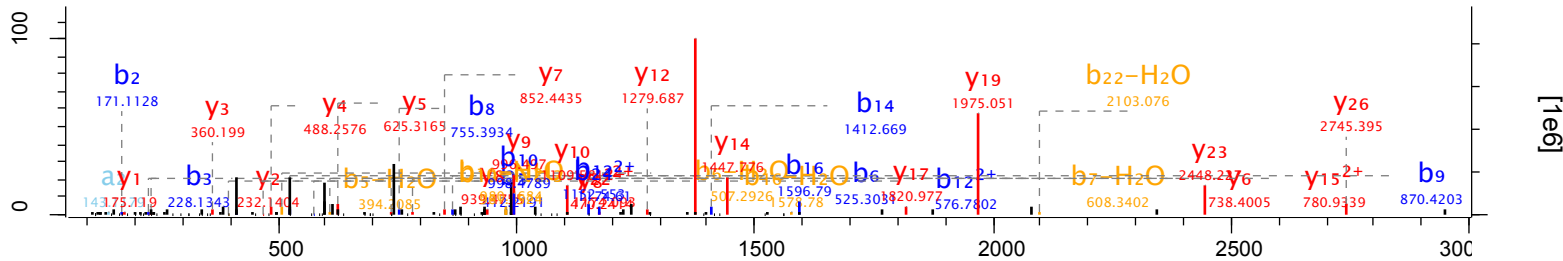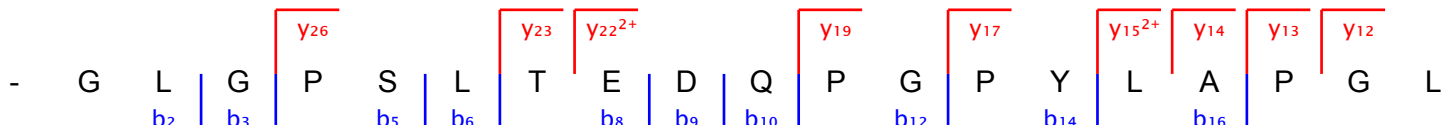

| Raw file                                      | Scan  | Method    | Score  | m/z   | Gene names |
|-----------------------------------------------|-------|-----------|--------|-------|------------|
| 20120706_EXQ2_AtDe_SA_WTR_OG_pooled_final_2_5 | 61242 | FTMS; HCD | 176.11 | 754.7 | Cnih4      |

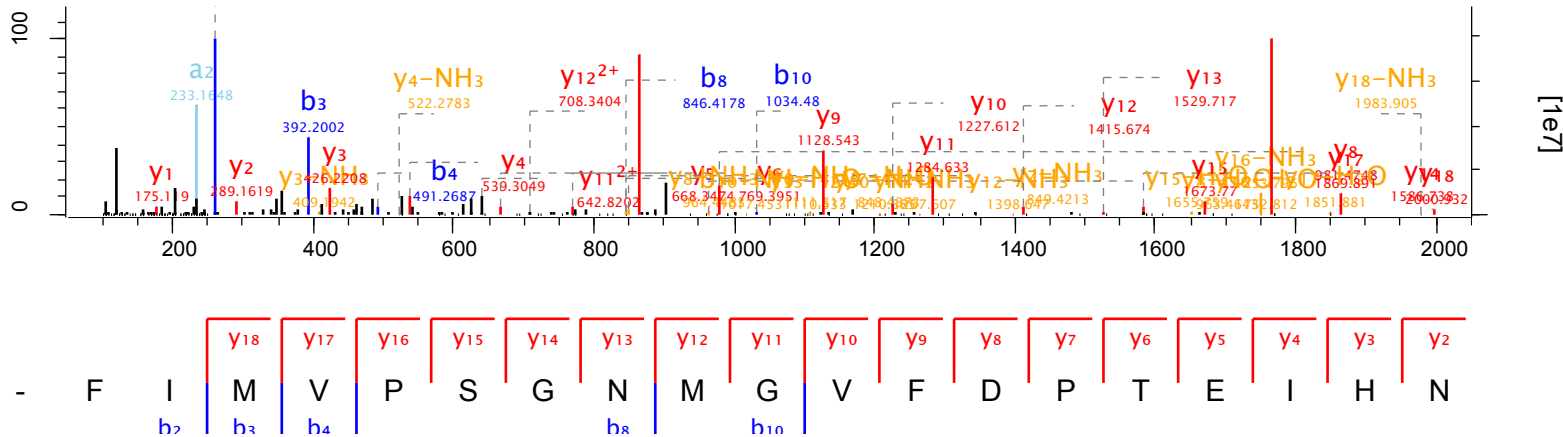

| Raw file                                      | Scan  | Method    | Score  | m/z     | Gene name |
|-----------------------------------------------|-------|-----------|--------|---------|-----------|
| 20120706_EXQ2_AtDe_SA_WTR_OG_pooled_final_2_5 | 61255 | FTMS; HCD | 148.38 | 1131.55 | Cnih4     |

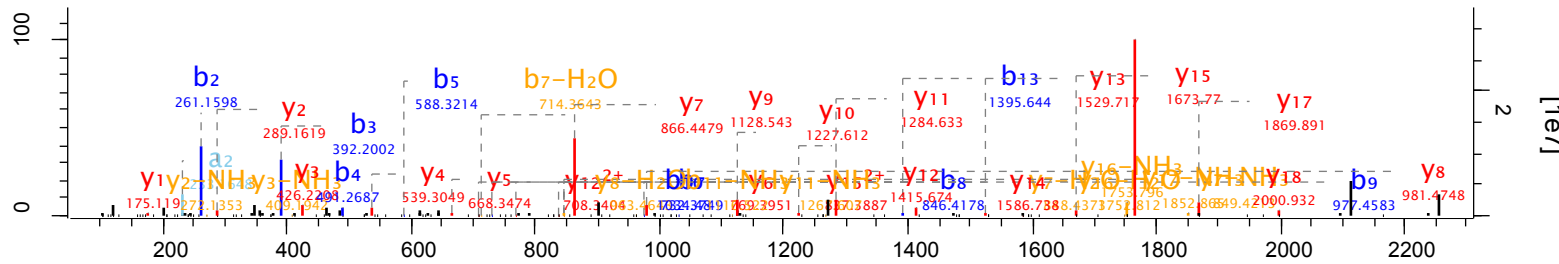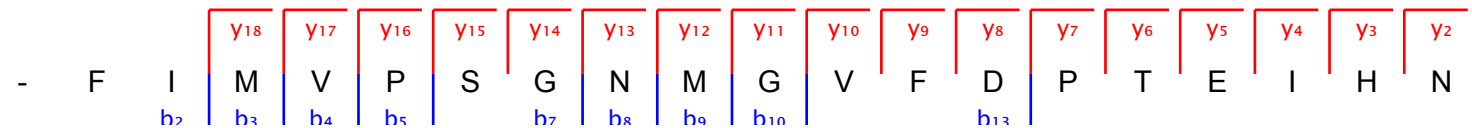

| Raw file                                      | Scan  | Method    | Score | m/z    | Gene names |
|-----------------------------------------------|-------|-----------|-------|--------|------------|
| 20120706_EXQ2_AtDe_SA_WTR_OG_pooled_final_2_5 | 65425 | FTMS; HCD | 73.39 | 574.65 | Panx1      |

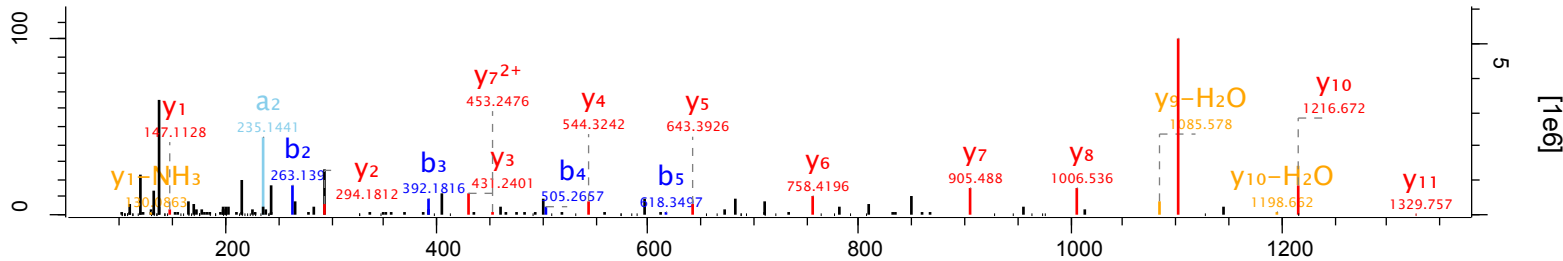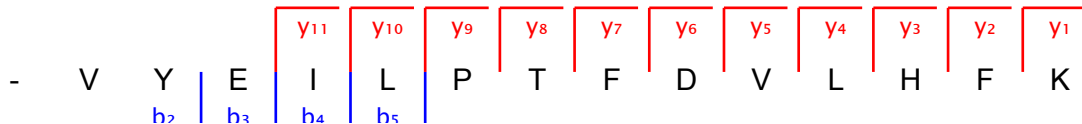

Raw file

20120706\_EXQ2\_AtDe\_SA\_WTR\_OG\_pooled\_final\_2\_5

Scan

66166

Method

FTMS; HCD

Score

79.47

m/z

1100.09

Gene name

Serinc2

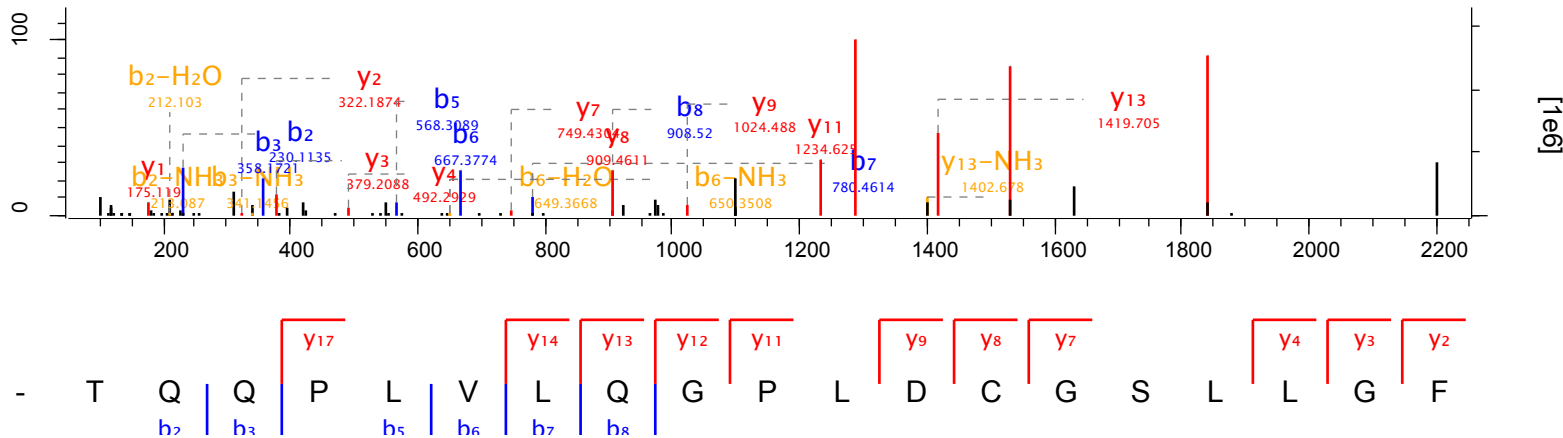

| Raw file                                      | Scan  | Method    | Score  | m/z    | Gene names |
|-----------------------------------------------|-------|-----------|--------|--------|------------|
| 20120706_EXQ2_AtDe_SA_WTR_OG_pooled_final_2_5 | 66246 | FTMS; HCD | 131.12 | 715.91 | Uqcr11     |

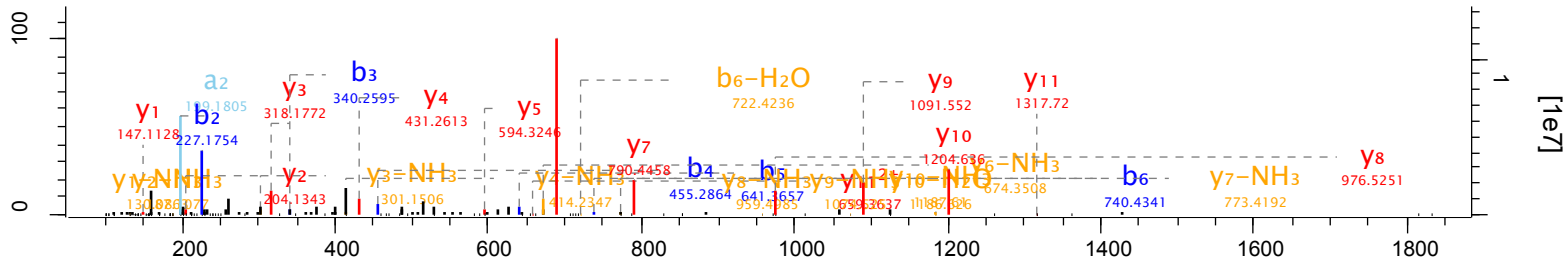

| Raw file                                      | Scan  | Method    | Score  | m/z    | Gene names |
|-----------------------------------------------|-------|-----------|--------|--------|------------|
| 20120706_EXQ2_AtDe_SA_WTR_OG_pooled_final_2_5 | 66336 | FTMS; HCD | 131.45 | 695.71 | Mfap4      |

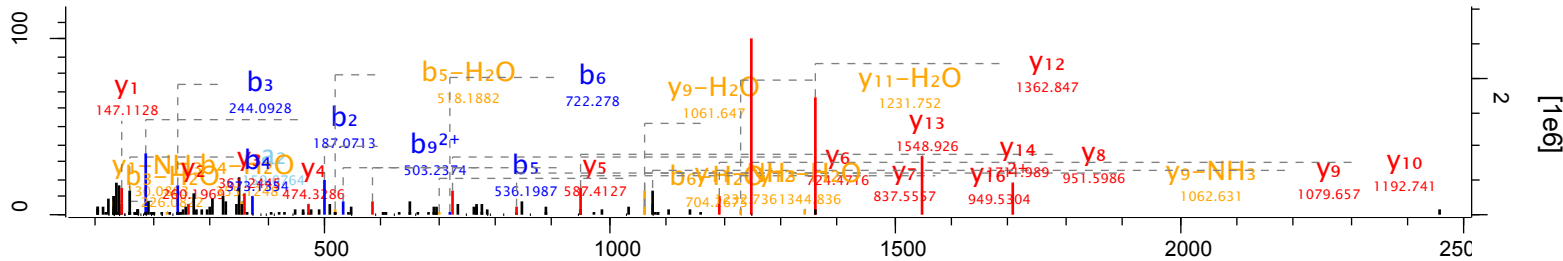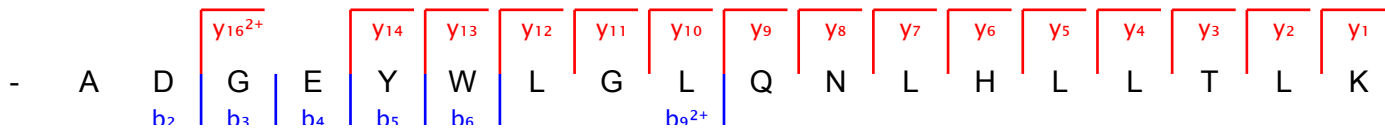

| Raw file                                      | Scan  | Method    | Score | m/z    | Gene names |
|-----------------------------------------------|-------|-----------|-------|--------|------------|
| 20120706_EXQ2_AtDe_SA_WTR_OG_pooled_final_2_6 | 16087 | FTMS; HCD | 73.88 | 464.22 | Myadml2    |

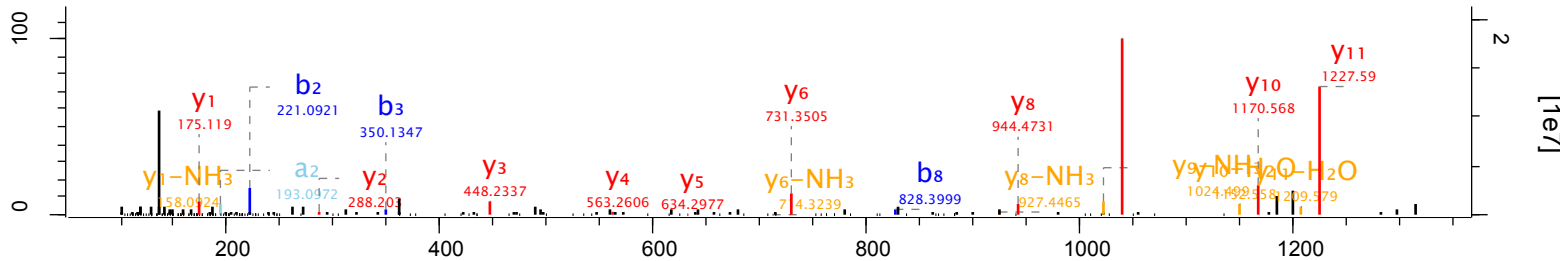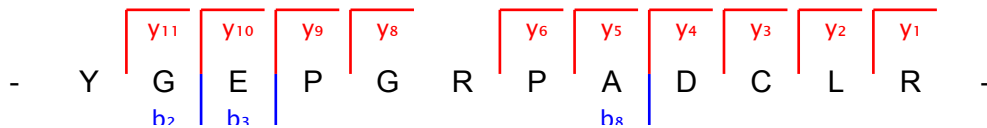



| Raw file                                      | Scan  | Method    | Score | m/z    | Gene names |
|-----------------------------------------------|-------|-----------|-------|--------|------------|
| 20120706_EXQ2_AtDe_SA_WTR_OG_pooled_final_2_6 | 21257 | FTMS; HCD | 94.41 | 398.56 | Apoa2      |

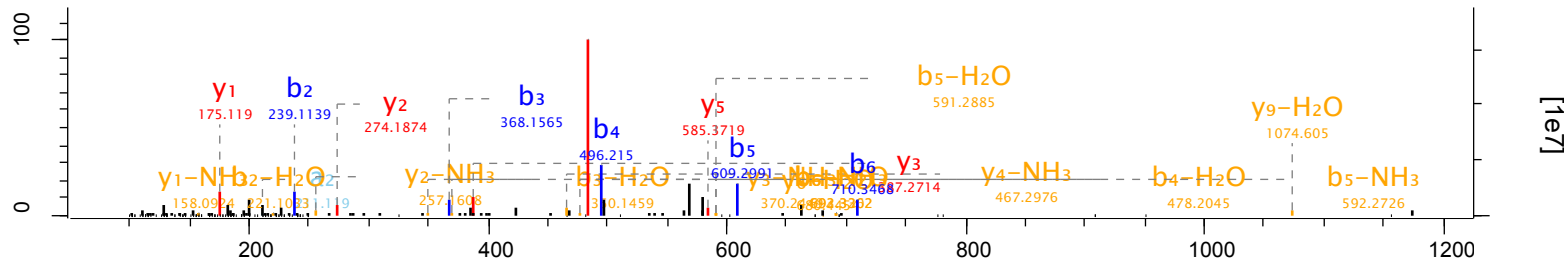

| Raw file                                      | Scan  | Method    | Score | m/z    | Gene names |
|-----------------------------------------------|-------|-----------|-------|--------|------------|
| 20120706_EXQ2_AtDe_SA_WTR_OG_pooled_final_2_6 | 21270 | FTMS; HCD | 90.96 | 597.29 | Bag5       |

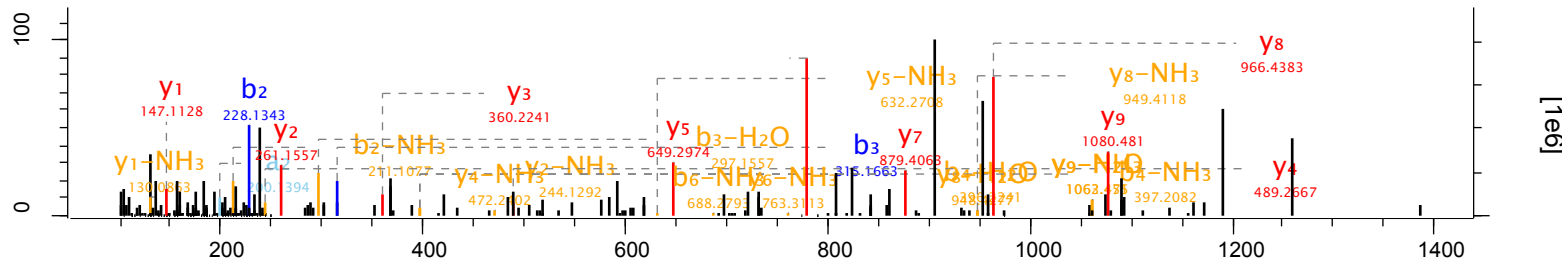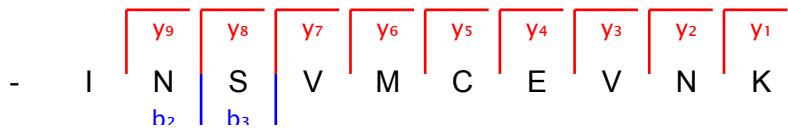

| Raw file                                      | Scan  | Method    | Score  | m/z    | Gene names |
|-----------------------------------------------|-------|-----------|--------|--------|------------|
| 20120706_EXQ2_AtDe_SA_WTR_OG_pooled_final_2_6 | 28085 | FTMS; HCD | 125.53 | 705.83 | Vkorc1     |

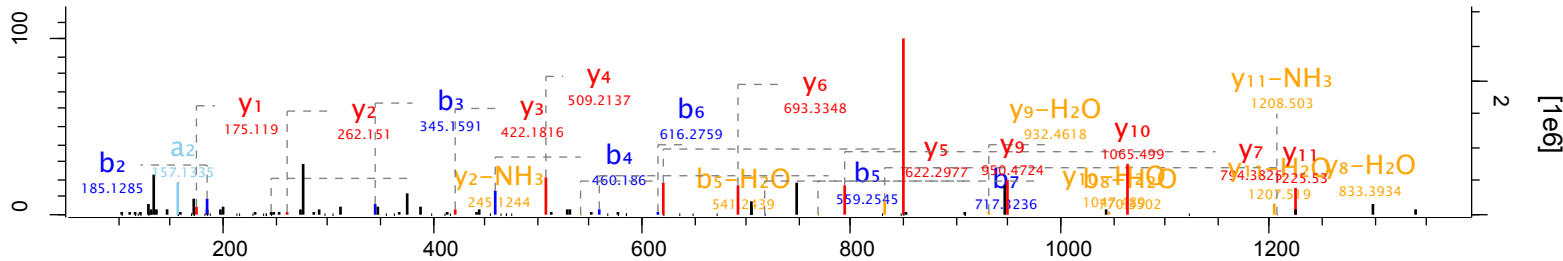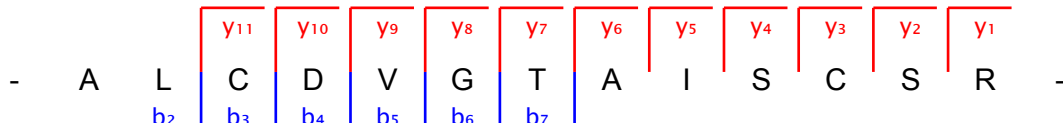

| Raw file                                      | Scan  | Method    | Score | m/z    | Gene names |
|-----------------------------------------------|-------|-----------|-------|--------|------------|
| 20120706_EXQ2_AtDe_SA_WTR_OG_pooled_final_2_6 | 29613 | FTMS; HCD | 96.11 | 476.24 | Mapk15     |

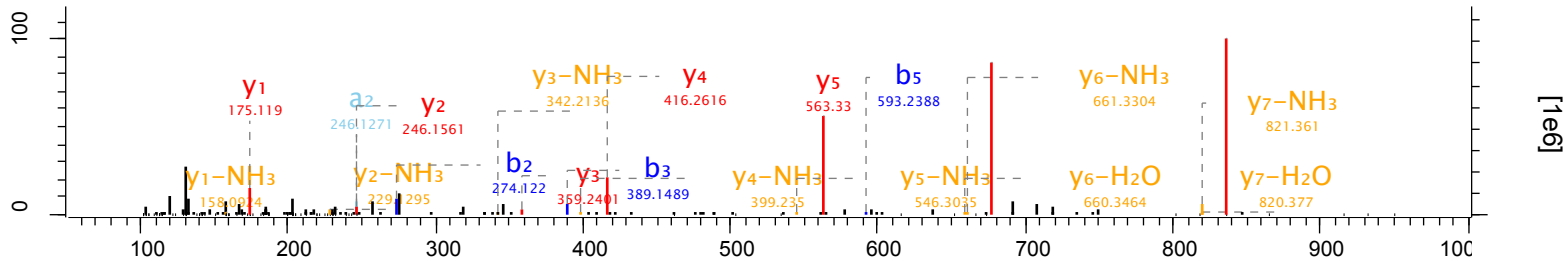

| Raw file                                      | Scan  | Method    | Score  | m/z    | Gene names |
|-----------------------------------------------|-------|-----------|--------|--------|------------|
| 20120706_EXQ2_AtDe_SA_WTR_OG_pooled_final_2_6 | 30671 | FTMS; HCD | 140.82 | 762.37 | Mbl2       |

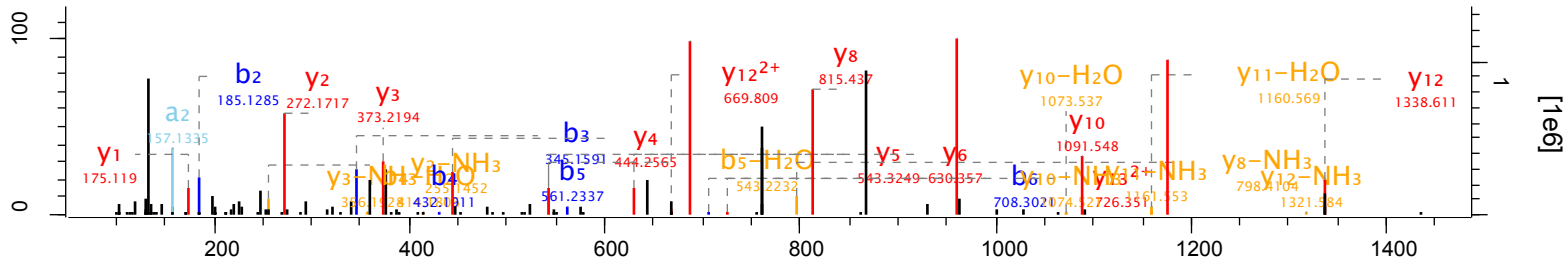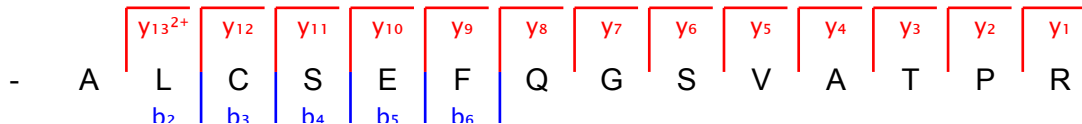

| Raw file                                      | Scan  | Method    | Score | m/z    | Gene names  |
|-----------------------------------------------|-------|-----------|-------|--------|-------------|
| 20120706_EXQ2_AtDe_SA_WTR_OG_pooled_final_2_6 | 31019 | FTMS; HCD | 95.91 | 524.78 | 4933433C111 |

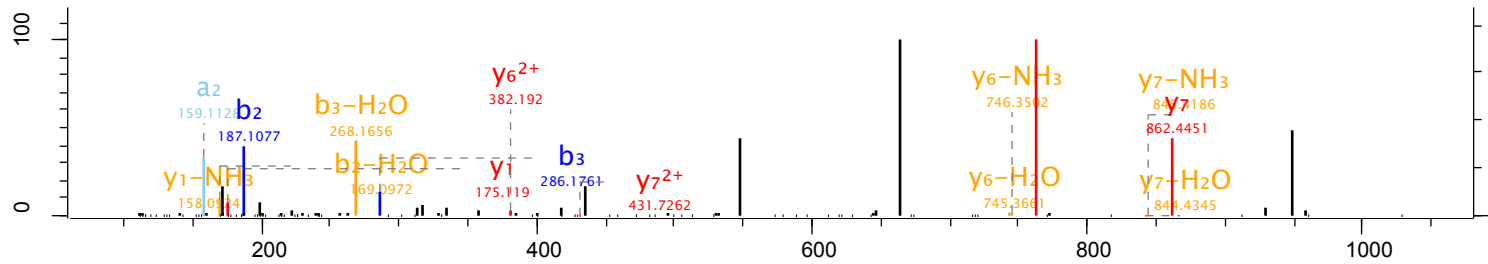

Raw file

Scan

Method

Score

m/z

20120706\_EXQ2\_AtDe\_SA\_WTR\_OG\_pooled\_final\_2\_6

35963

FTMS; HCD

99.09

619.02

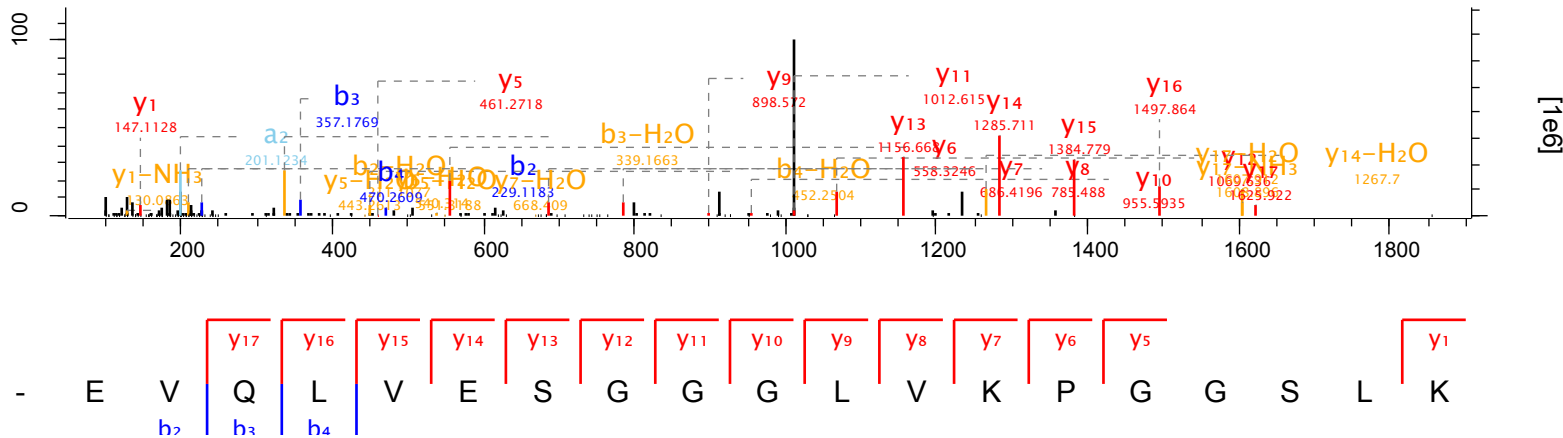

| Raw file                                      | Scan  | Method    | Score | m/z    | Gene names |
|-----------------------------------------------|-------|-----------|-------|--------|------------|
| 20120706_EXQ2_AtDe_SA_WTR_OG_pooled_final_2_6 | 36991 | FTMS; HCD | 80.63 | 809.93 | Retnla     |

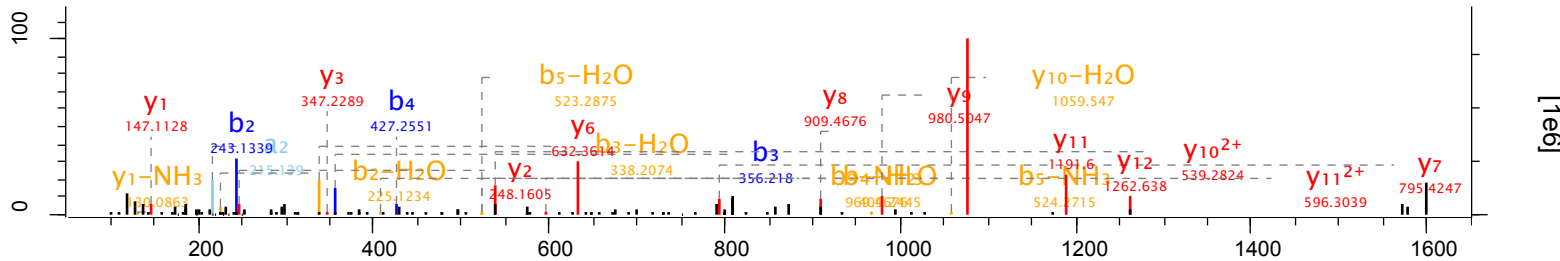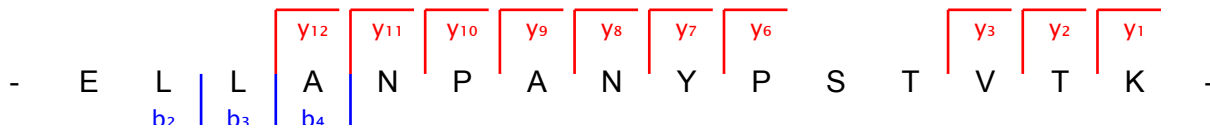



| Raw file                                      | Scan  | Method    | Score | m/z    | Gene names |
|-----------------------------------------------|-------|-----------|-------|--------|------------|
| 20120706_EXQ2_AtDe_SA_WTR_OG_pooled_final_2_6 | 40577 | FTMS; HCD | 118.6 | 716.34 | Ndufa1     |

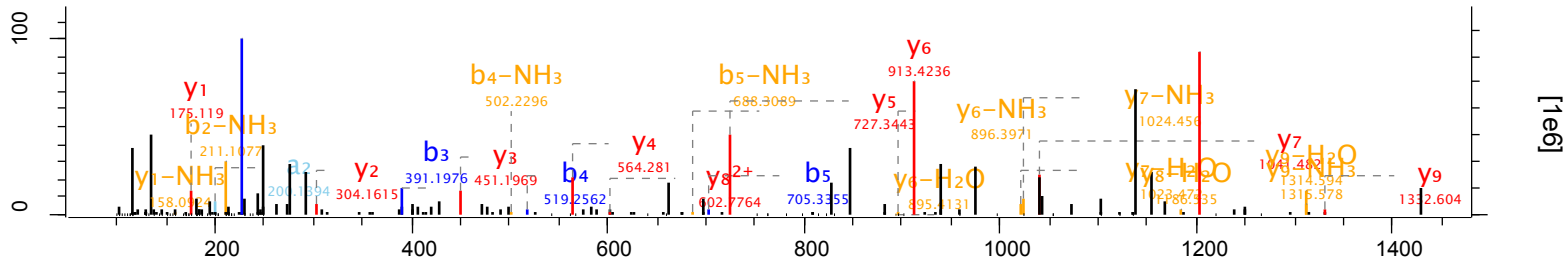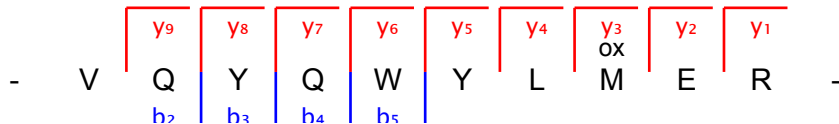

| Raw file                                      | Scan  | Method    | Score | m/z    | Gene names |
|-----------------------------------------------|-------|-----------|-------|--------|------------|
| 20120706_EXQ2_AtDe_SA_WTR_OG_pooled_final_2_6 | 48126 | FTMS; HCD | 89.36 | 852.96 | Rfesd      |

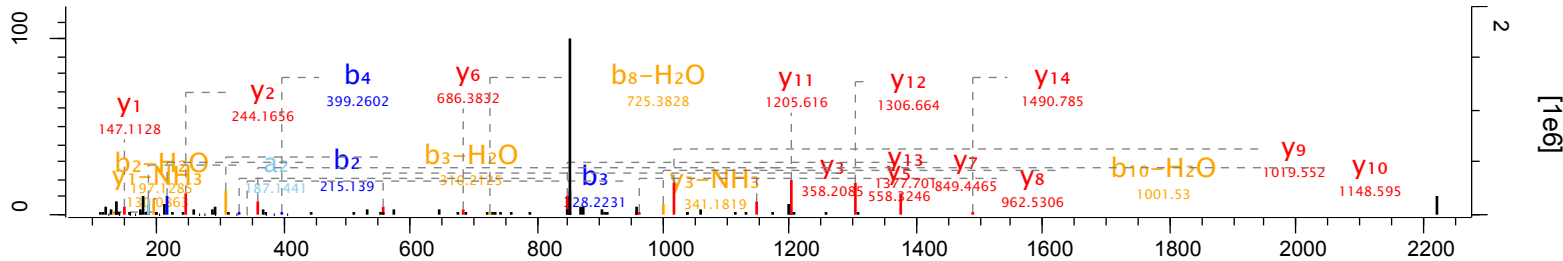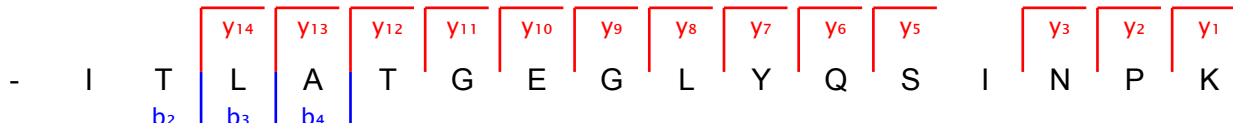

Raw file

20120706\_EXQ2\_AtDe\_SA\_WTR\_OG\_pooled\_final\_2\_6

Scan

48589

Method

FTMS; HCD

Score

146.17

m/z

708.34

Gene names

Ndufa1

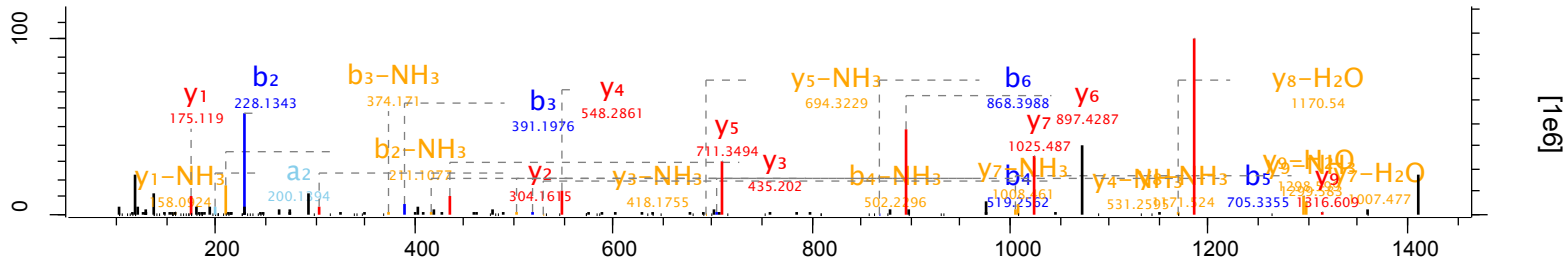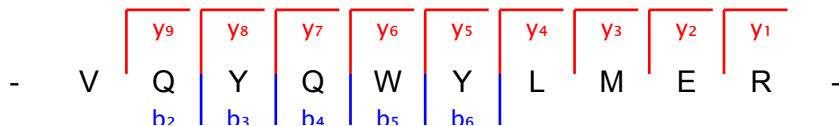

Raw file

Scan

Method

Score

m/z

20120706\_EXQ2\_AtDe\_SA\_WTR\_OG\_pooled\_final\_2\_6

56144

FTMS; HCD

79.65

859.98

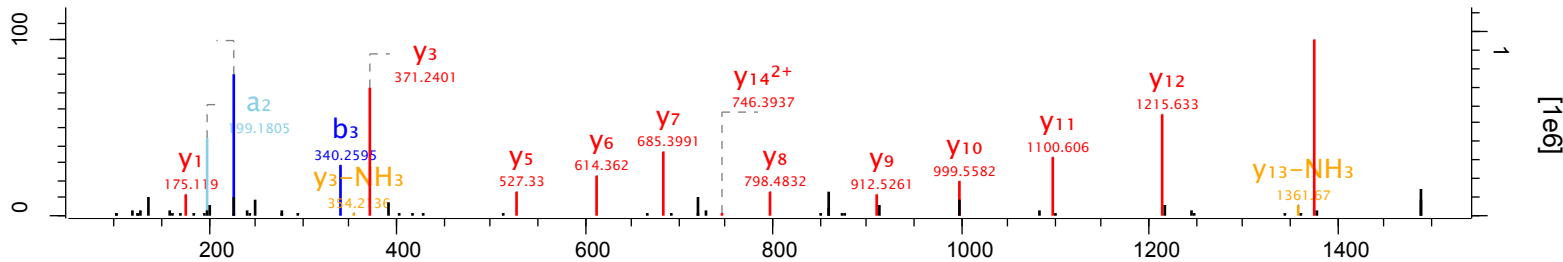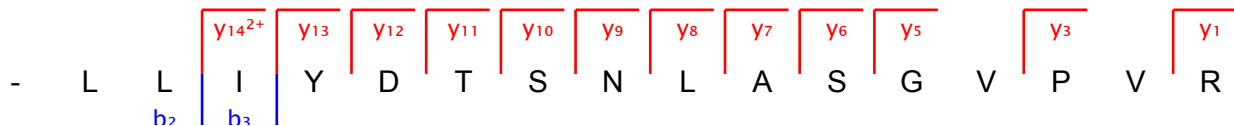

| Raw file                                      | Scan  | Method    | Score | m/z    | Gene names |
|-----------------------------------------------|-------|-----------|-------|--------|------------|
| 20120706_EXQ2_AtDe_SA_WTR_OG_pooled_final_2_6 | 56716 | FTMS; HCD | 60.55 | 876.42 | Gm5629     |

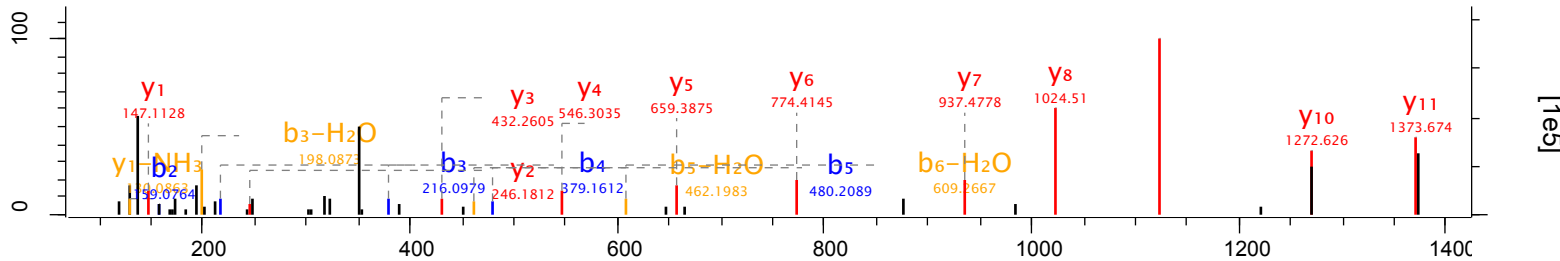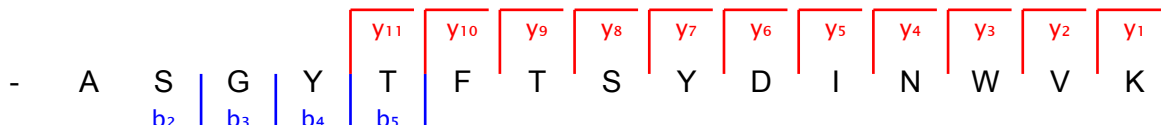

| Raw file                                      | Scan  | Method    | Score | m/z    | Gene names |
|-----------------------------------------------|-------|-----------|-------|--------|------------|
| 20120706_EXQ2_AtDe_SA_WTR_OG_pooled_final_2_6 | 59288 | FTMS; HCD | 85.81 | 660.87 | Ptprc      |

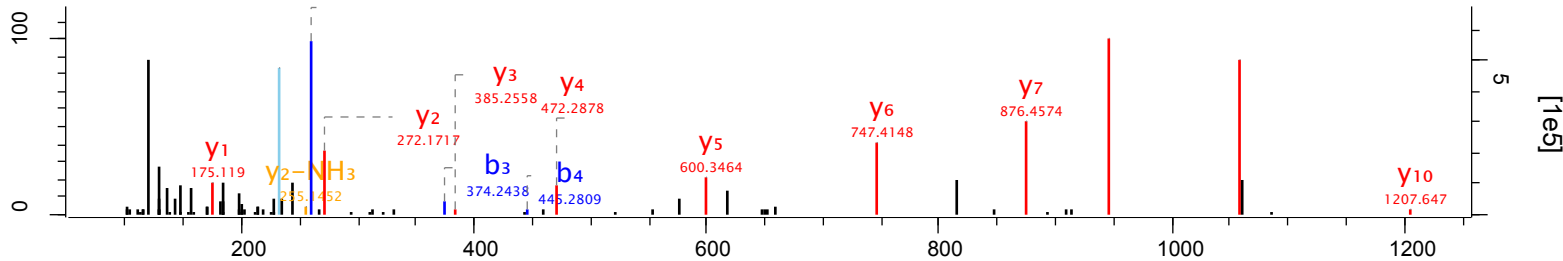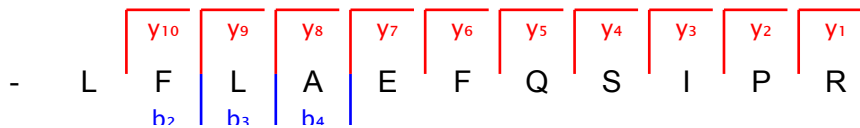

| Raw file                                      | Scan  | Method    | Score | m/z     | Gene name |
|-----------------------------------------------|-------|-----------|-------|---------|-----------|
| 20120706_EXQ2_AtDe_SA_WTR_OG_pooled_final_2_6 | 62882 | FTMS; HCD | 60.62 | 1038.05 | Mpv1712   |

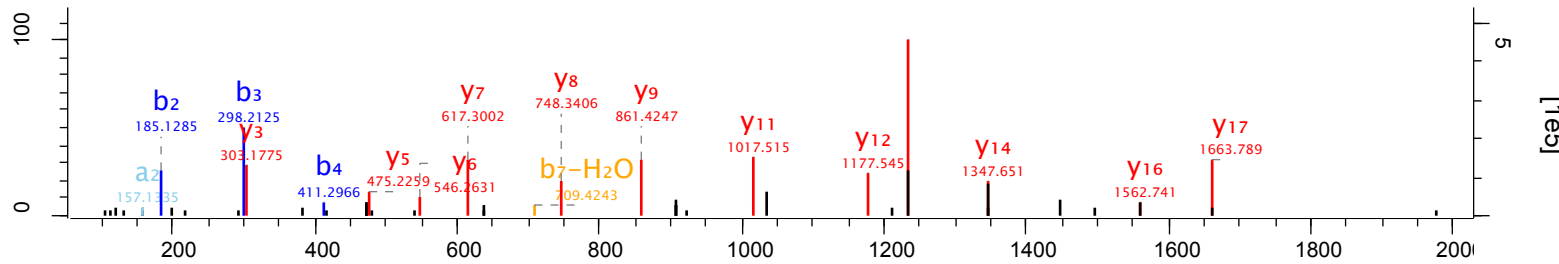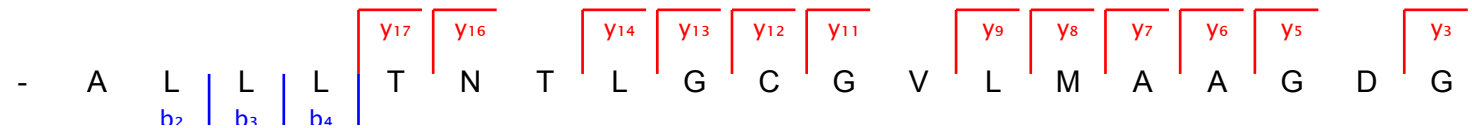

| Raw file                                      | Scan  | Method    | Score  | m/z    | Gene names |
|-----------------------------------------------|-------|-----------|--------|--------|------------|
| 20120706_EXQ2_AtDe_SA_WTR_OG_pooled_final_2_6 | 64339 | FTMS; HCD | 104.07 | 716.41 | Uqcr11     |

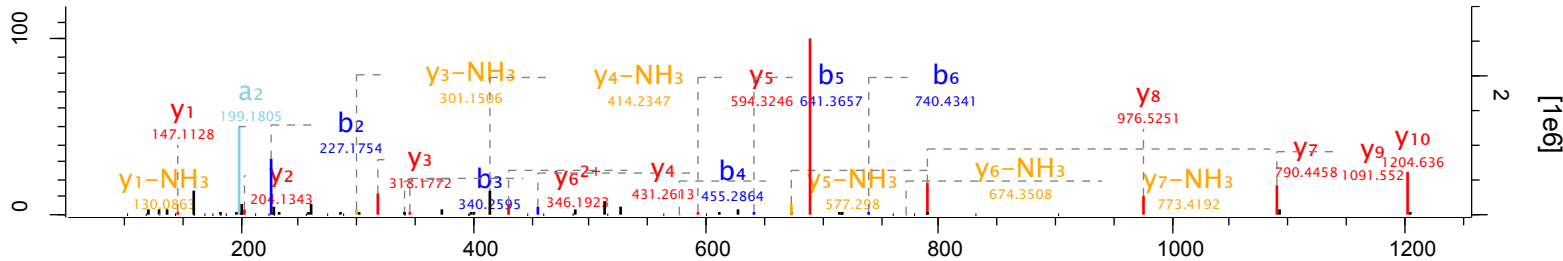



| Raw file                                      | Scan  | Method    | Score | m/z    | Gene names  |
|-----------------------------------------------|-------|-----------|-------|--------|-------------|
| 20120706_EXQ2_AtDe_SA_WTR_OG_pooled_final_2_7 | 10983 | FTMS; HCD | 85.84 | 532.27 | mt-Co3;Mtco |

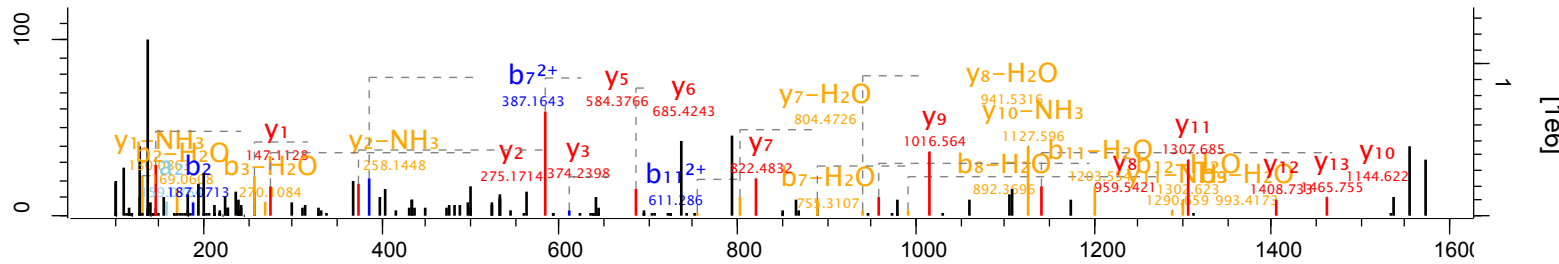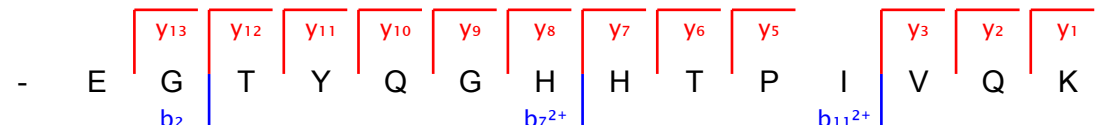

| Raw file                                      | Scan  | Method    | Score | m/z    | Gene names  |
|-----------------------------------------------|-------|-----------|-------|--------|-------------|
| 20120706_EXQ2_AtDe_SA_WTR_OG_pooled_final_2_7 | 10986 | FTMS; HCD | 82.07 | 399.45 | mt-Co3;Mtco |

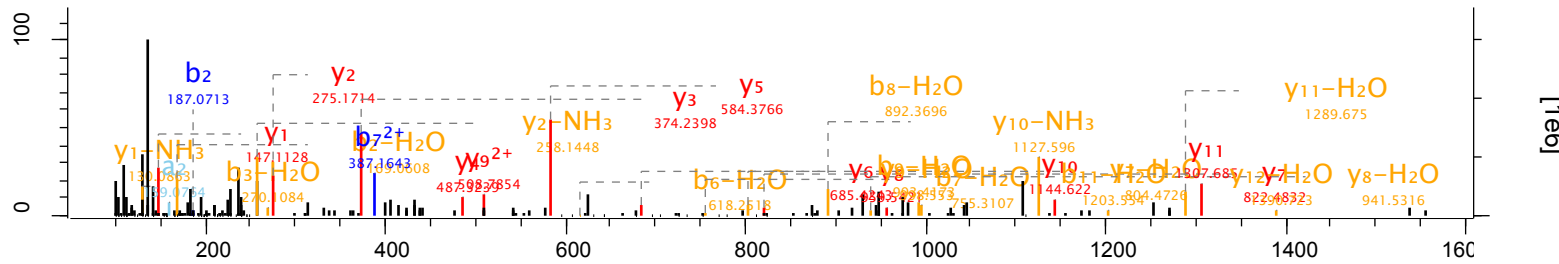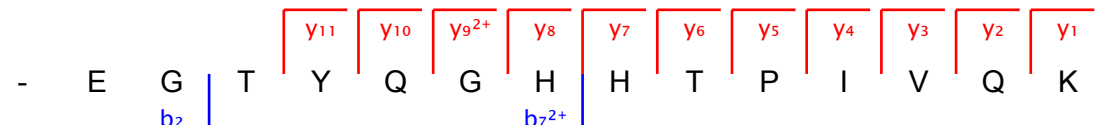

| Raw file                                      | Scan  | Method    | Score | m/z    | Gene names |
|-----------------------------------------------|-------|-----------|-------|--------|------------|
| 20120706_EXQ2_AtDe_SA_WTR_OG_pooled_final_2_7 | 14431 | FTMS; HCD | 68.04 | 618.59 | Nr4a1      |

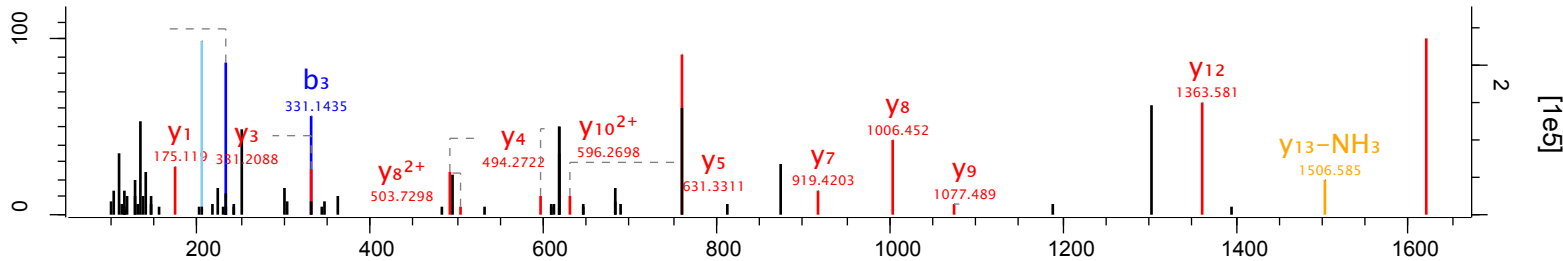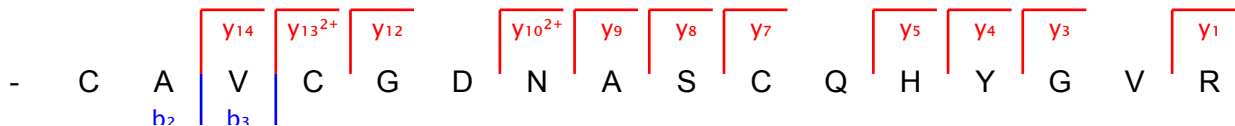

| Raw file                                      | Scan  | Method    | Score | m/z    | Gene names |
|-----------------------------------------------|-------|-----------|-------|--------|------------|
| 20120706_EXQ2_AtDe_SA_WTR_OG_pooled_final_2_7 | 15003 | FTMS; HCD | 77.28 | 468.24 | AI481877   |

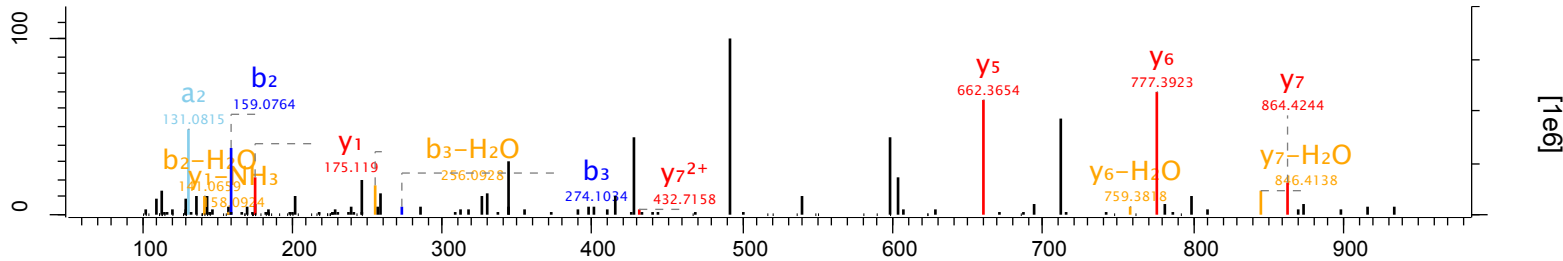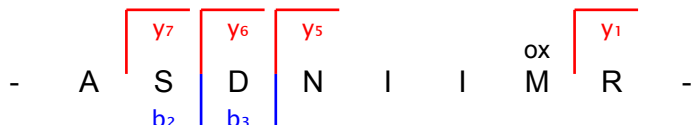

| Raw file                                      | Scan  | Method    | Score | m/z    | Gene names |
|-----------------------------------------------|-------|-----------|-------|--------|------------|
| 20120706_EXQ2_AtDe_SA_WTR_OG_pooled_final_2_7 | 22254 | FTMS; HCD | 74.84 | 398.56 | Apoa2      |

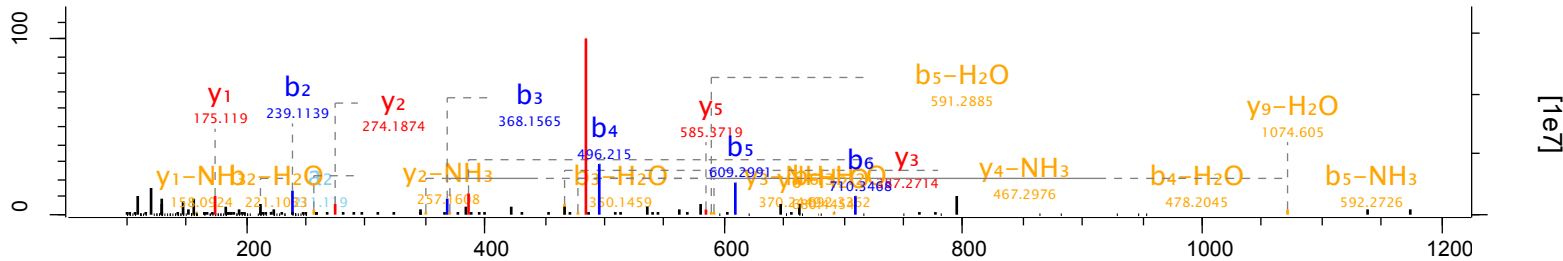

| Raw file                                      | Scan  | Method    | Score  | m/z    | Gene names |
|-----------------------------------------------|-------|-----------|--------|--------|------------|
| 20120706_EXQ2_AtDe_SA_WTR_OG_pooled_final_2_7 | 29093 | FTMS; HCD | 119.25 | 705.83 | Vkorc1     |

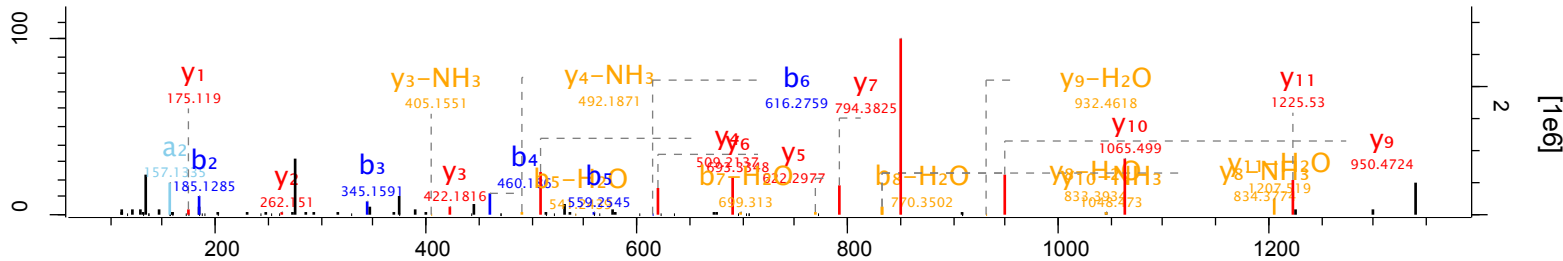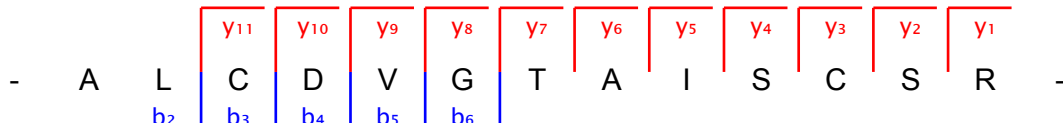

Raw file

Scan

Method

Score

m/z

20120706\_EXQ2\_AtDe\_SA\_WTR\_OG\_pooled\_final\_2\_7

32378

FTMS; HCD

84.51

749.42

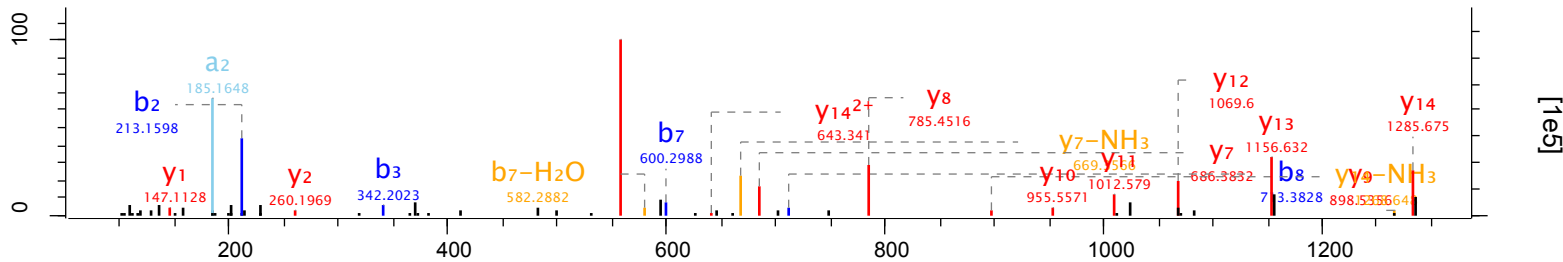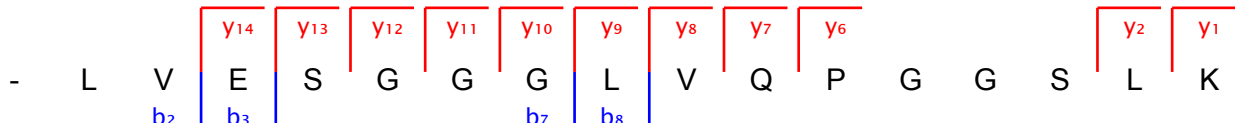

Raw file

Scan

Method

Score

m/z

20120706\_EXQ2\_AtDe\_SA\_WTR\_OG\_pooled\_final\_2\_7

37174

FTMS; HCD

124.63

619.02

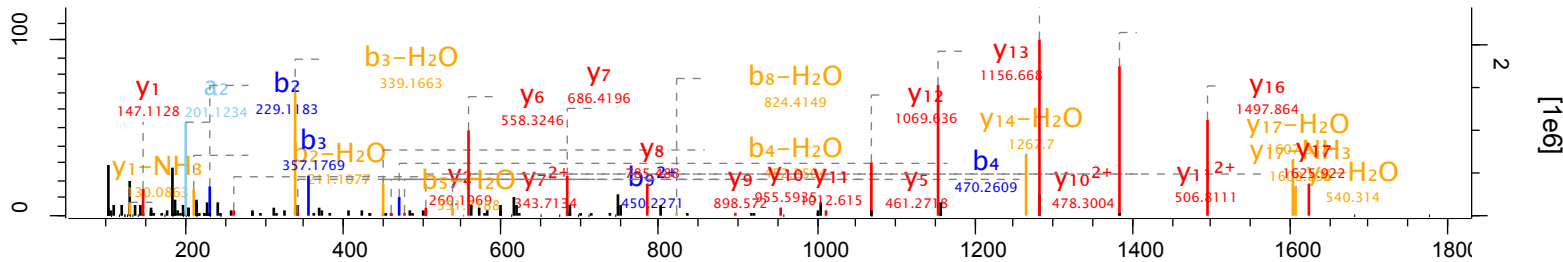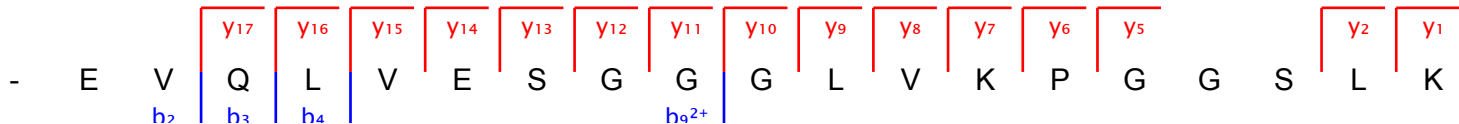



| Raw file                                      | Scan  | Method    | Score | m/z    | Gene names |
|-----------------------------------------------|-------|-----------|-------|--------|------------|
| 20120706_EXQ2_AtDe_SA_WTR_OG_pooled_final_2_7 | 43977 | FTMS; HCD | 49.53 | 593.54 | Msrb1      |

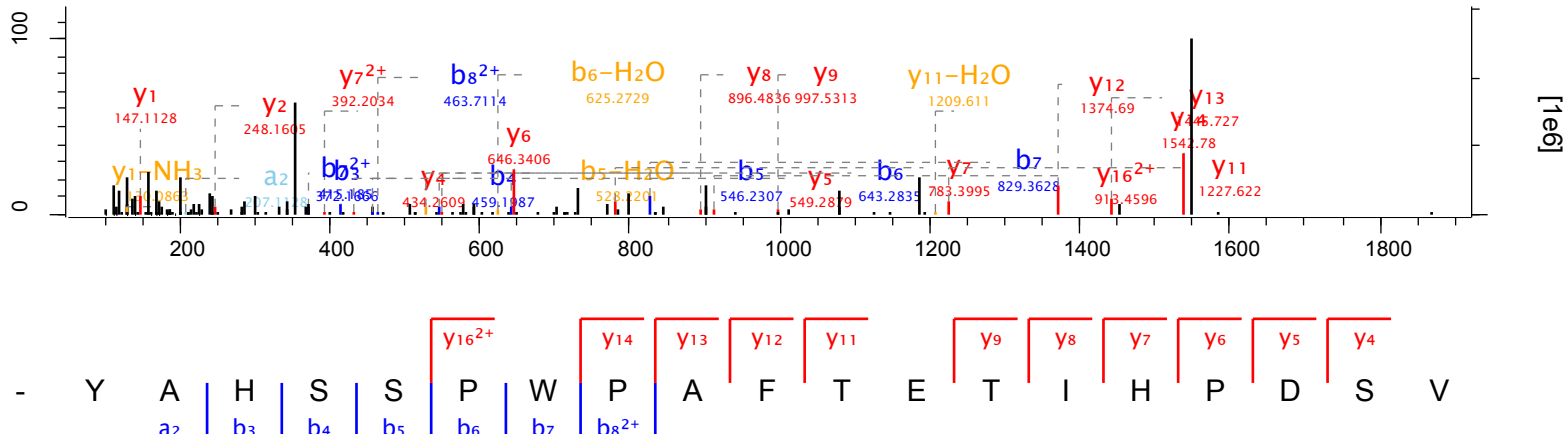

| Raw file                                      | Scan  | Method    | Score | m/z    | Gene names |
|-----------------------------------------------|-------|-----------|-------|--------|------------|
| 20120706_EXQ2_AtDe_SA_WTR_OG_pooled_final_2_7 | 46468 | FTMS; HCD | 27.2  | 613.82 | Rnf130     |

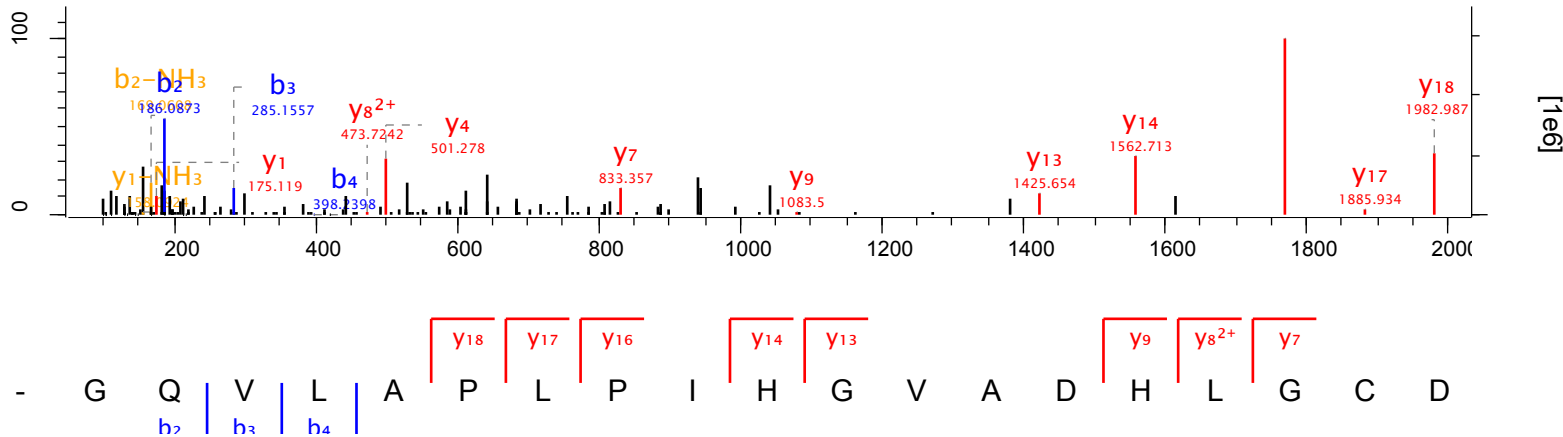

| Raw file                                      | Scan  | Method    | Score | m/z    | Gene names |
|-----------------------------------------------|-------|-----------|-------|--------|------------|
| 20120706_EXQ2_AtDe_SA_WTR_OG_pooled_final_2_7 | 46503 | FTMS; HCD | 19.4  | 817.76 | Rnf130     |

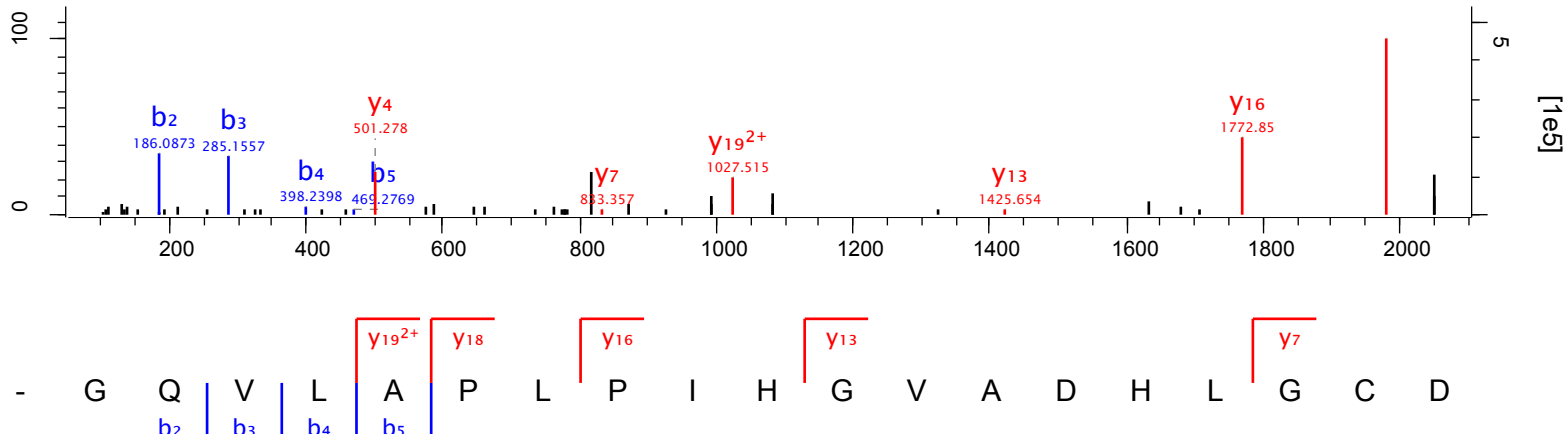

| Raw file                                      | Scan  | Method    | Score | m/z    | Gene names |
|-----------------------------------------------|-------|-----------|-------|--------|------------|
| 20120706_EXQ2_AtDe_SA_WTR_OG_pooled_final_2_7 | 49992 | FTMS; HCD | 59.42 | 708.34 | Ndufa1     |

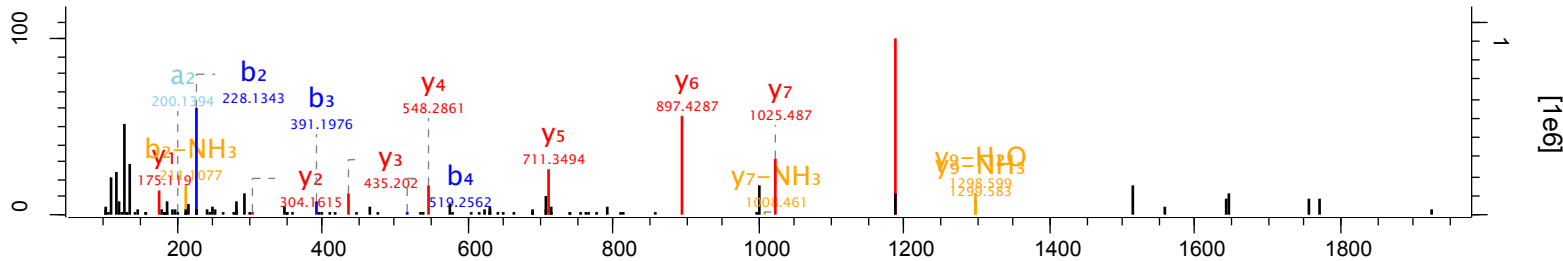

| Raw file                                      | Scan | Method    | Score | m/z    | Gene names |
|-----------------------------------------------|------|-----------|-------|--------|------------|
| 20120706_EXQ2_AtDe_SA_WTR_OG_pooled_final_2_7 | 9587 | FTMS; HCD | 76.23 | 344.93 | Lhx6       |

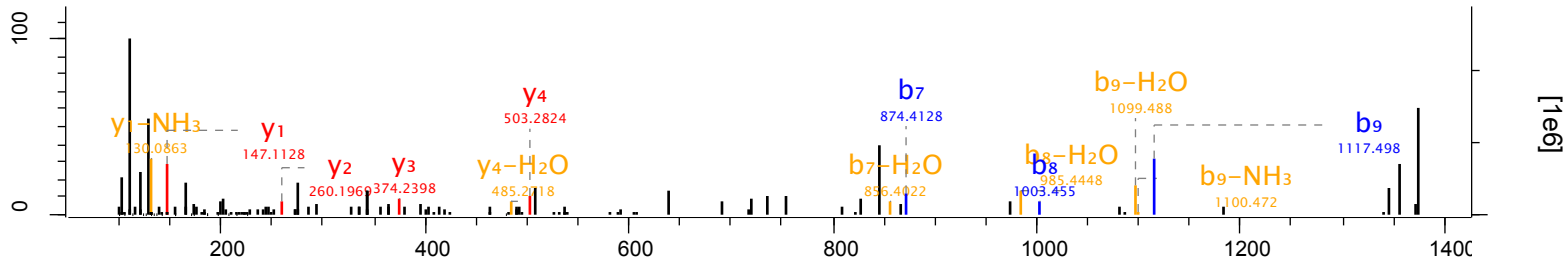

- I H Y D T M I E N L K -  
b<sub>7</sub>
b<sub>x</sub>
b<sub>9</sub>

| Raw file                                      | Scan  | Method    | Score | m/z    | Gene names  |
|-----------------------------------------------|-------|-----------|-------|--------|-------------|
| 20120706_EXQ2_AtDe_SA_WTR_OG_pooled_final_2_8 | 10646 | FTMS; HCD | 81.9  | 399.46 | mt-Co3;Mtco |

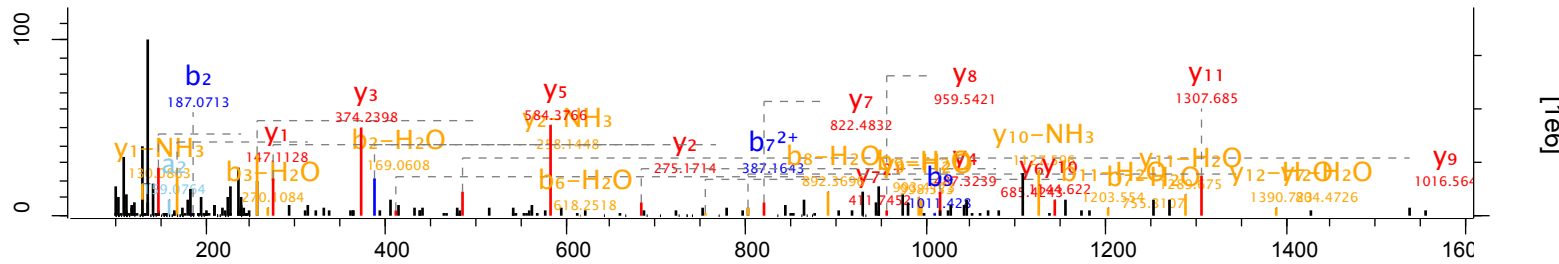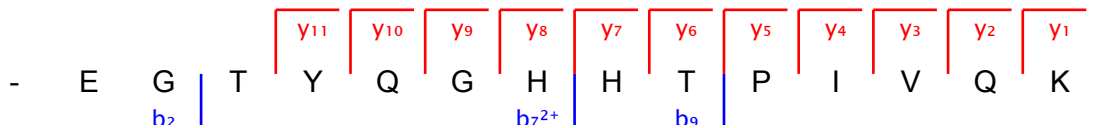

| Raw file                                      | Scan  | Method    | Score | m/z    | Gene names  |
|-----------------------------------------------|-------|-----------|-------|--------|-------------|
| 20120706_EXQ2_AtDe_SA_WTR_OG_pooled_final_2_8 | 10651 | FTMS; HCD | 97.69 | 532.27 | mt-Co3;Mtco |

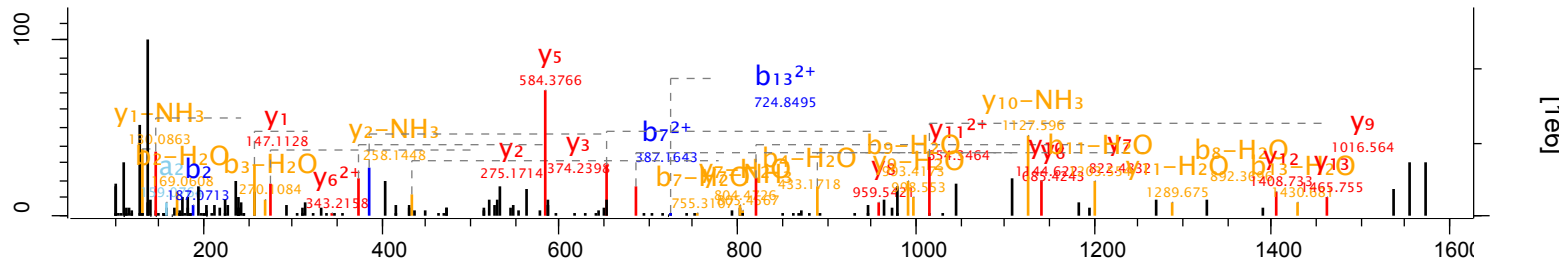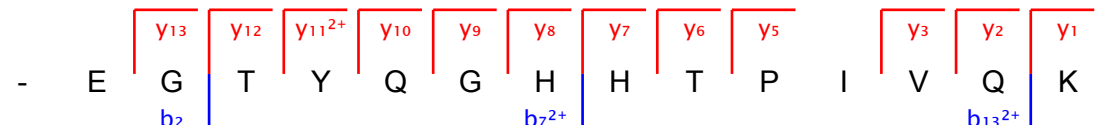

Raw file

Scan

Method

Score

m/z

20120706\_EXQ2\_AtDe\_SA\_WTR\_OG\_pooled\_final\_2\_8

14925

FTMS; HCD

115.33

430.9

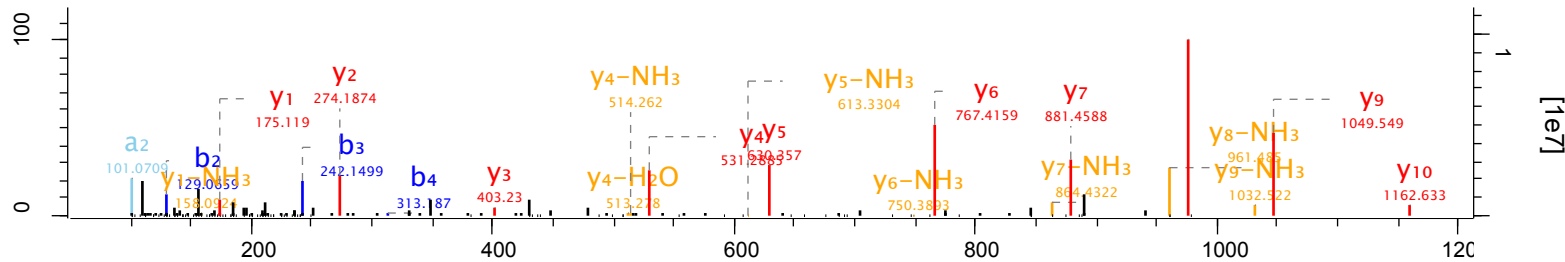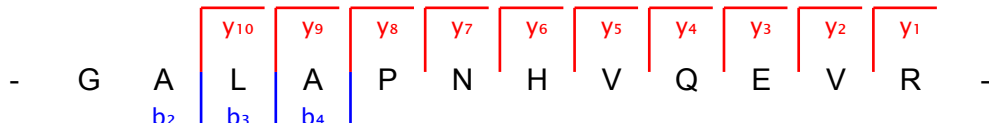



Raw file

Scan

Method

Score

m/z

20120706\_EXQ2\_AtDe\_SA\_WTR\_OG\_pooled\_final\_2\_8

14940

FTMS; HCD

56.96

645.85

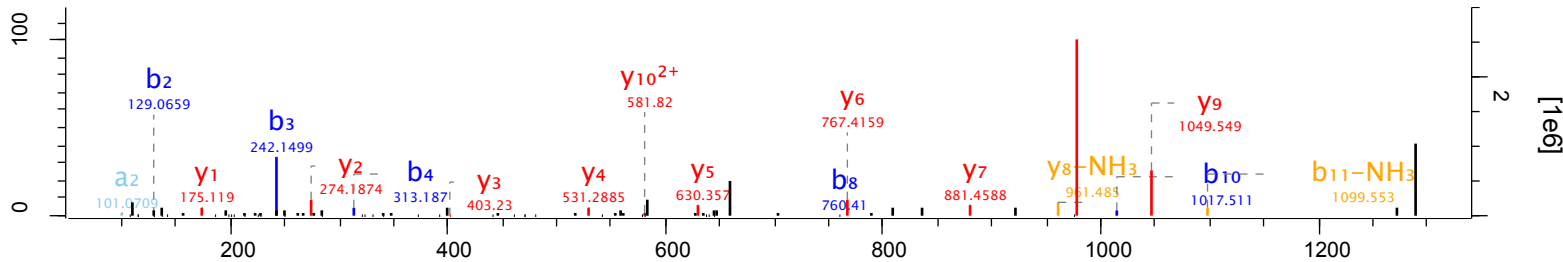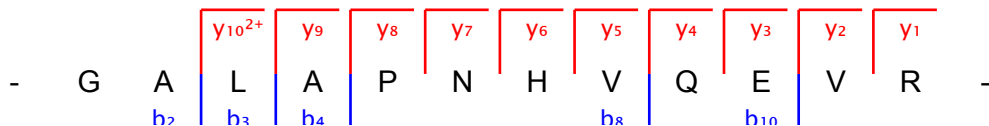

Raw file

Scan

Method

Score

m/z

20120706\_EXQ2\_AtDe\_SA\_WTR\_OG\_pooled\_final\_2\_8

27038

FTMS; HCD

69.23

457.22

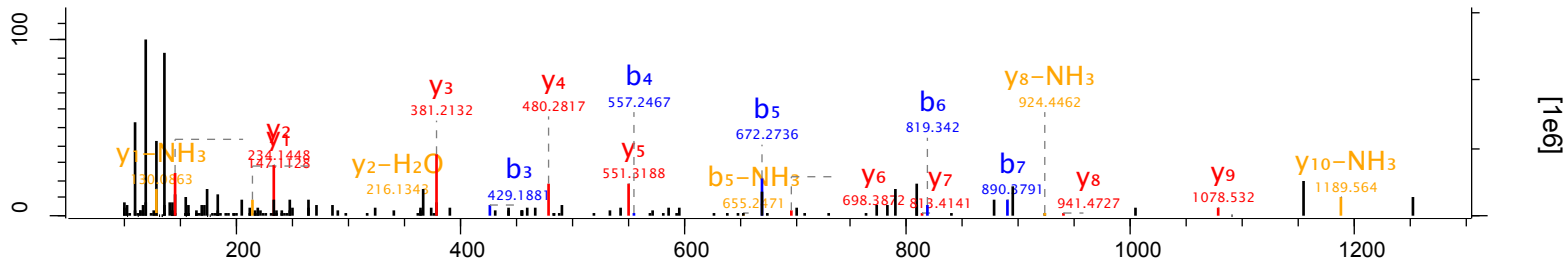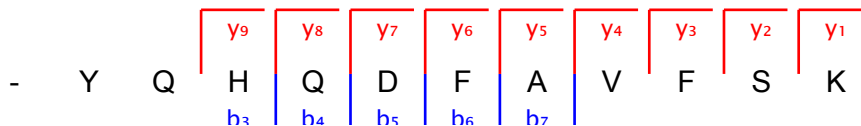

| Raw file                                      | Scan  | Method    | Score | m/z    | Gene names |
|-----------------------------------------------|-------|-----------|-------|--------|------------|
| 20120706_EXQ2_AtDe_SA_WTR_OG_pooled_final_2_8 | 29772 | FTMS; HCD | 98.94 | 782.39 | Syp        |

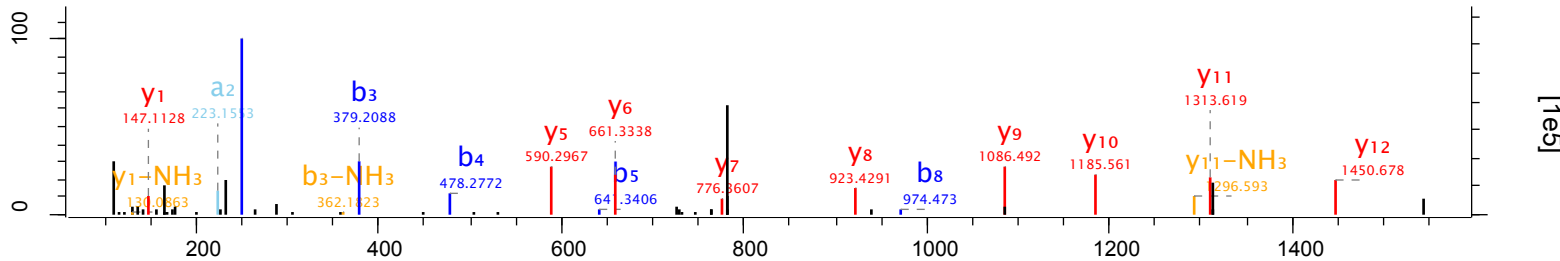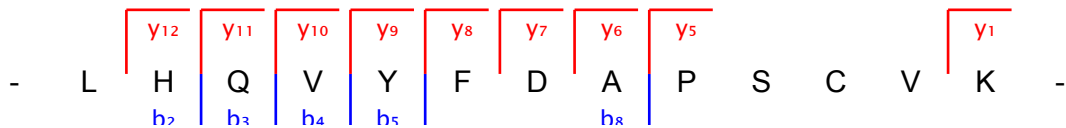

| Raw file                                      | Scan  | Method    | Score | m/z    | Gene names      |
|-----------------------------------------------|-------|-----------|-------|--------|-----------------|
| 20120706_EXQ2_AtDe_SA_WTR_OG_pooled_final_2_8 | 32500 | FTMS; HCD | 96.63 | 488.59 | Tmem254;D14Ert4 |

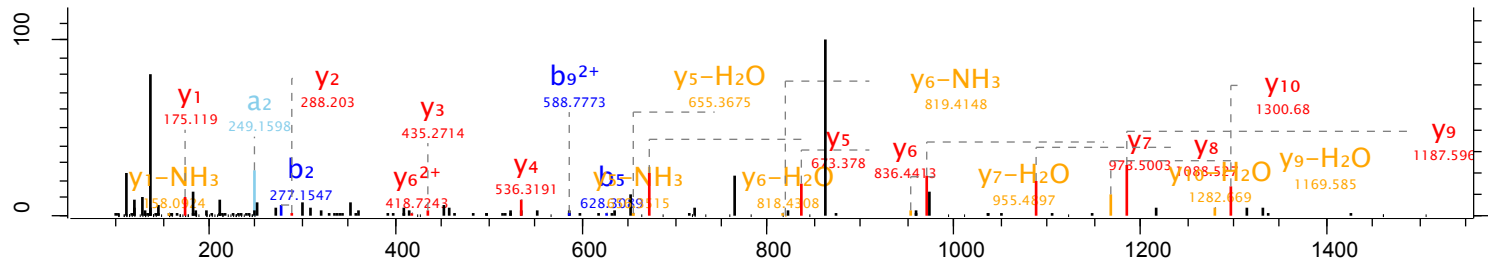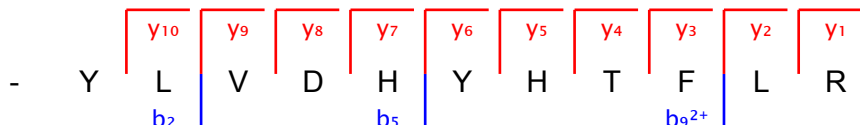

[1e6]

| Raw file                                      | Scan  | Method    | Score | m/z | Gene names |
|-----------------------------------------------|-------|-----------|-------|-----|------------|
| 20120706_EXQ2_AtDe_SA_WTR_OG_pooled_final_2_8 | 36267 | FTMS; HCD | 47.64 | 629 | Gpsm3      |

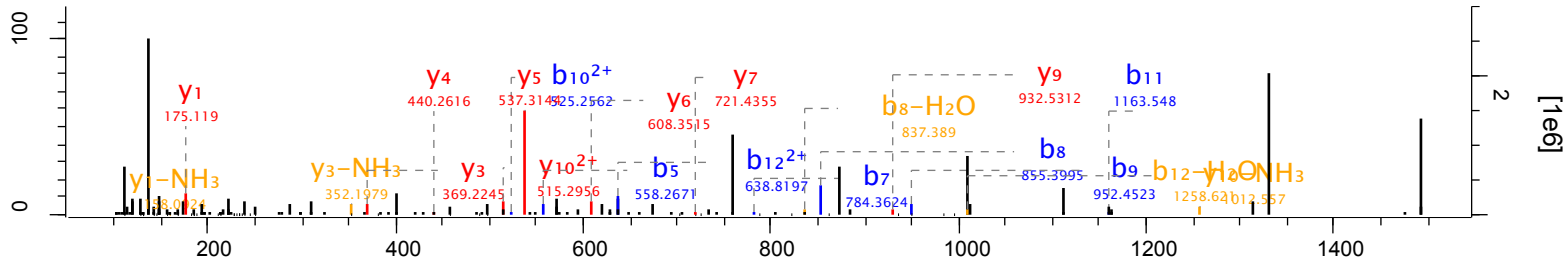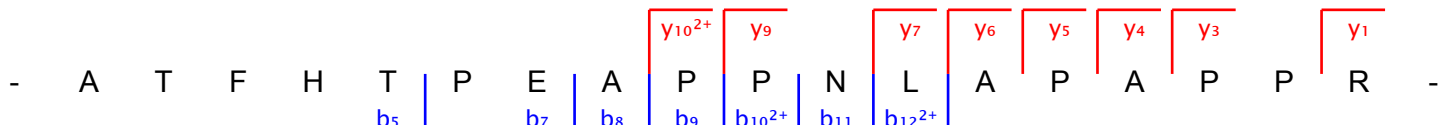

| Raw file                                      | Scan  | Method    | Score | m/z    | Gene names |
|-----------------------------------------------|-------|-----------|-------|--------|------------|
| 20120706_EXQ2_AtDe_SA_WTR_OG_pooled_final_2_8 | 40306 | FTMS; HCD | 75.53 | 701.36 | Stxbp6     |

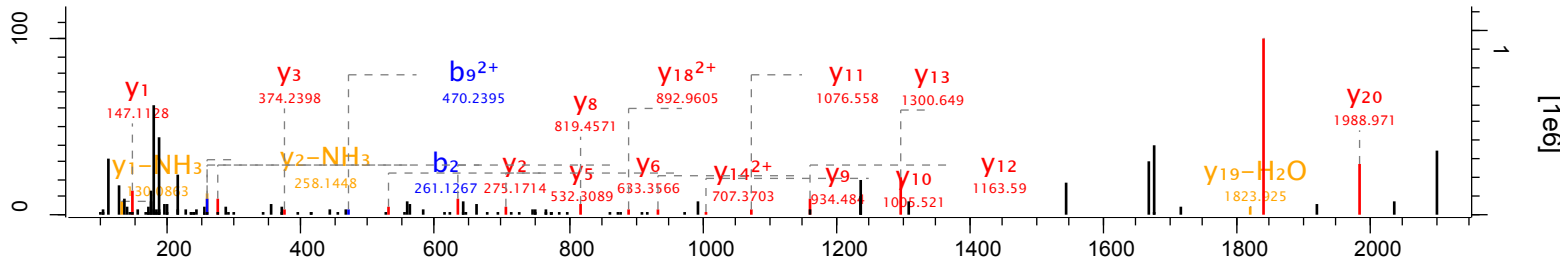

Sequence alignment showing fragmentation sites (y and b ions) and amino acid residues. The sequence is: - I M G G N S I L H S A A D S V T S A V. Fragmentation sites are indicated by brackets above the residues, with labels such as y<sub>20</sub> OX, y<sub>19</sub>, y<sub>18</sub><sup>2+</sup>, y<sub>14</sub><sup>2+</sup>, y<sub>13</sub>, y<sub>12</sub>, y<sub>11</sub>, y<sub>10</sub>, y<sub>9</sub>, y<sub>8</sub>, y<sub>6</sub>, y<sub>5</sub>, and y<sub>3</sub>. Blue labels b<sub>2</sub> and b<sub>9</sub><sup>2+</sup> are also present below the sequence.

| Raw file                                      | Scan  | Method    | Score | m/z    | Gene names |
|-----------------------------------------------|-------|-----------|-------|--------|------------|
| 20120706_EXQ2_AtDe_SA_WTR_OG_pooled_final_2_8 | 43382 | FTMS; HCD | 41.7  | 587.31 | Fsd11      |

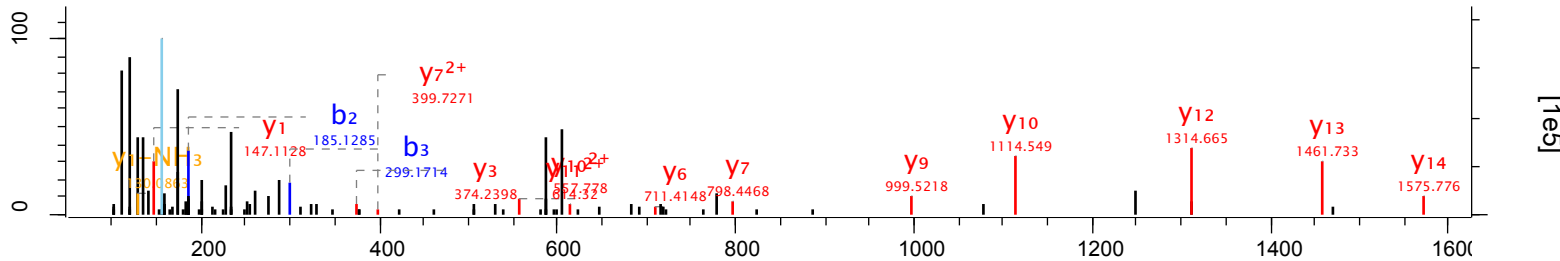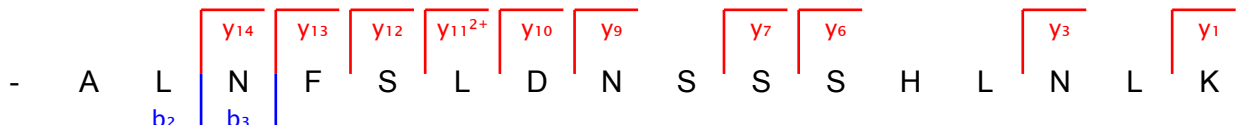

| Raw file                                      | Scan  | Method    | Score | m/z    | Gene names |
|-----------------------------------------------|-------|-----------|-------|--------|------------|
| 20120706_EXQ2_AtDe_SA_WTR_OG_pooled_final_2_8 | 46067 | FTMS; HCD | 89.91 | 569.98 | Cyp2e1     |

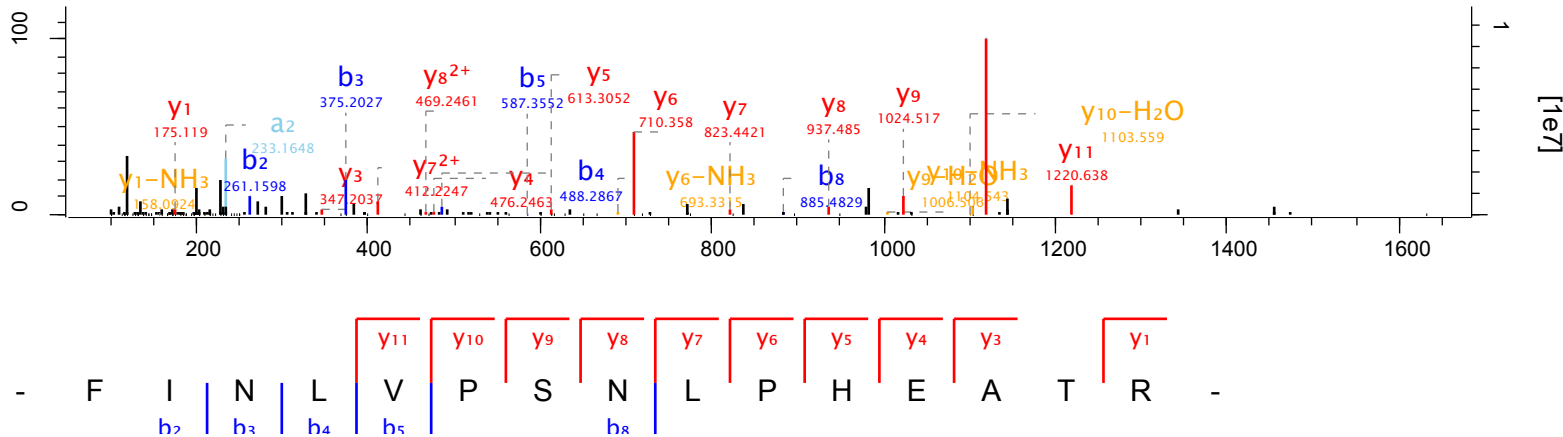



| Raw file                                      | Scan  | Method    | Score | m/z    | Gene names |
|-----------------------------------------------|-------|-----------|-------|--------|------------|
| 20120706_EXQ2_AtDe_SA_WTR_OG_pooled_final_2_9 | 11576 | FTMS; HCD | 44.31 | 553.29 | Map2       |

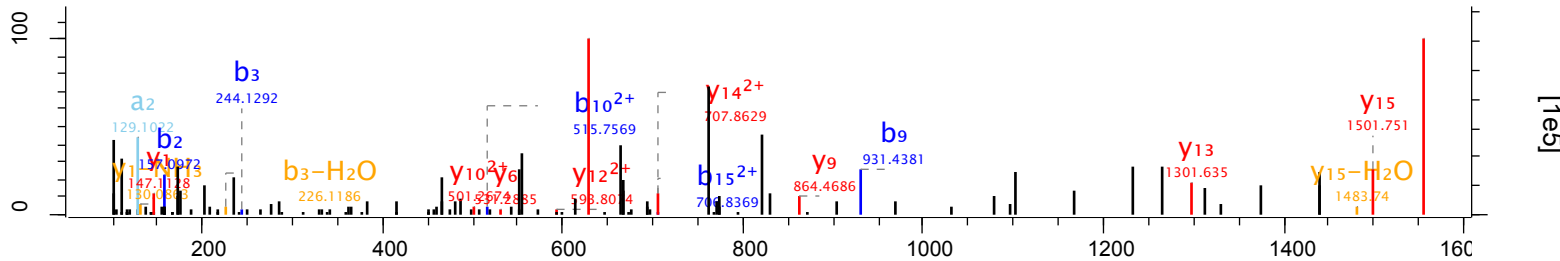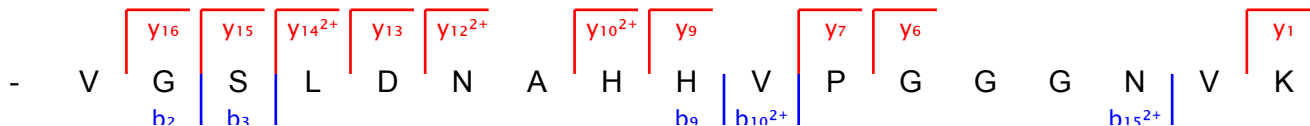

Raw file

Scan

Method

Score

m/z

20120706\_EXQ2\_AtDe\_SA\_WTR\_OG\_pooled\_final\_2\_9

13451

FTMS; HCD

81.92

430.9

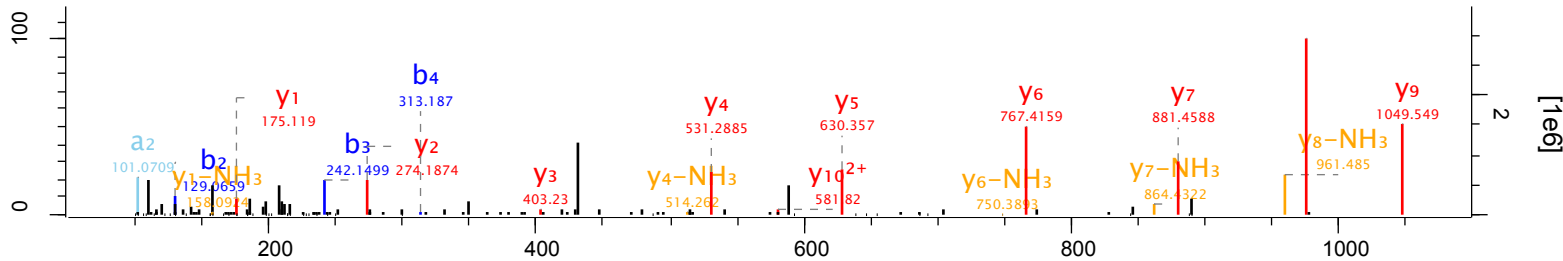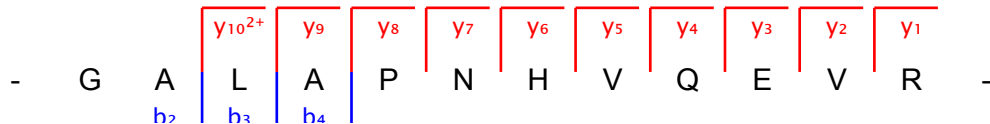

Raw file

Scan

Method

Score

m/z

20120706\_EXQ2\_AtDe\_SA\_WTR\_OG\_pooled\_final\_2\_9

13468

FTMS; HCD

81.92

645.85

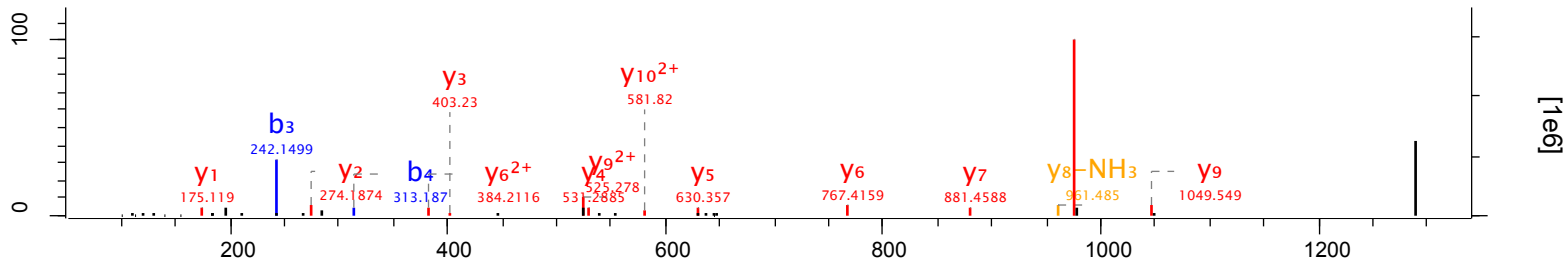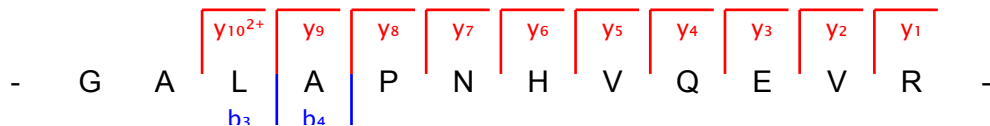

| Raw file                                      | Scan  | Method    | Score | m/z    | Gene names |
|-----------------------------------------------|-------|-----------|-------|--------|------------|
| 20120706_EXQ2_AtDe_SA_WTR_OG_pooled_final_2_9 | 17673 | FTMS; HCD | 74.99 | 409.88 | Slc27a3    |

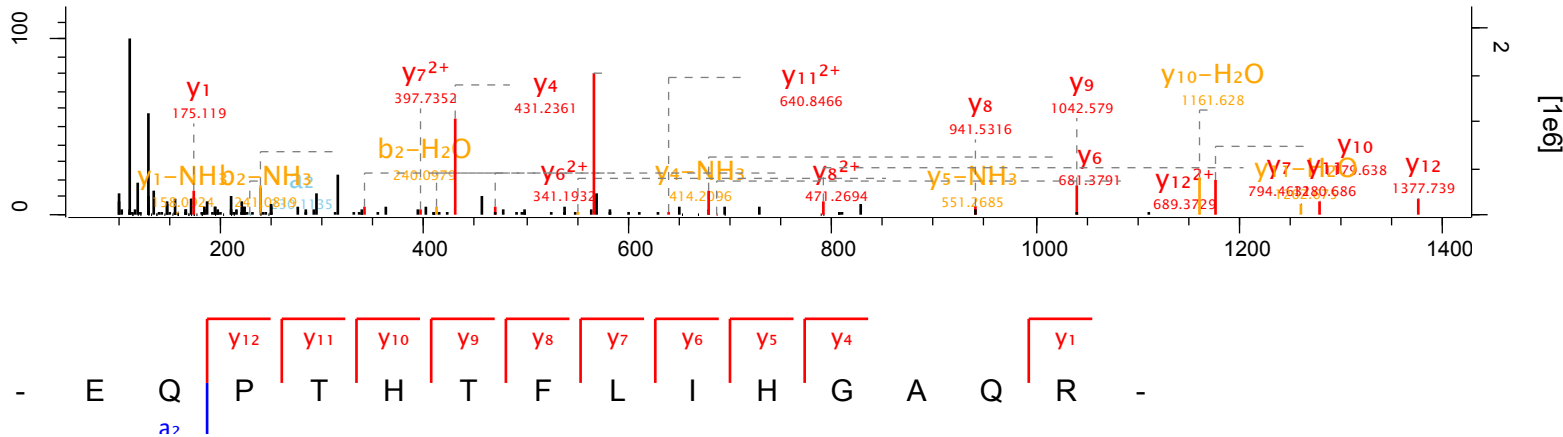

| Raw file                                      | Scan  | Method    | Score | m/z    | Gene names |
|-----------------------------------------------|-------|-----------|-------|--------|------------|
| 20120706_EXQ2_AtDe_SA_WTR_OG_pooled_final_2_9 | 23675 | FTMS; HCD | 75.11 | 354.82 | Apoc3      |

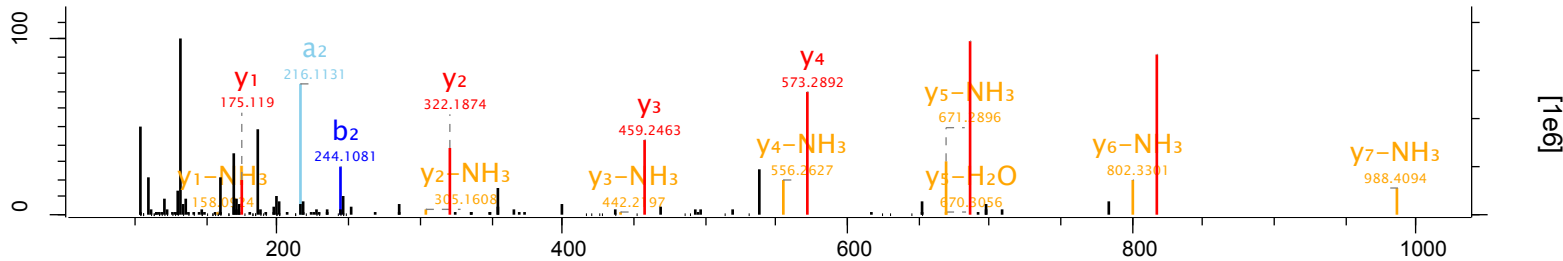

Raw file

Scan

Method

Score

m/z

Gene names

20120706\_EXQ2\_AtDe\_SA\_WTR\_OG\_pooled\_final\_2\_9

24973

FTMS; HCD

29.09

570.33

Zdhhc24

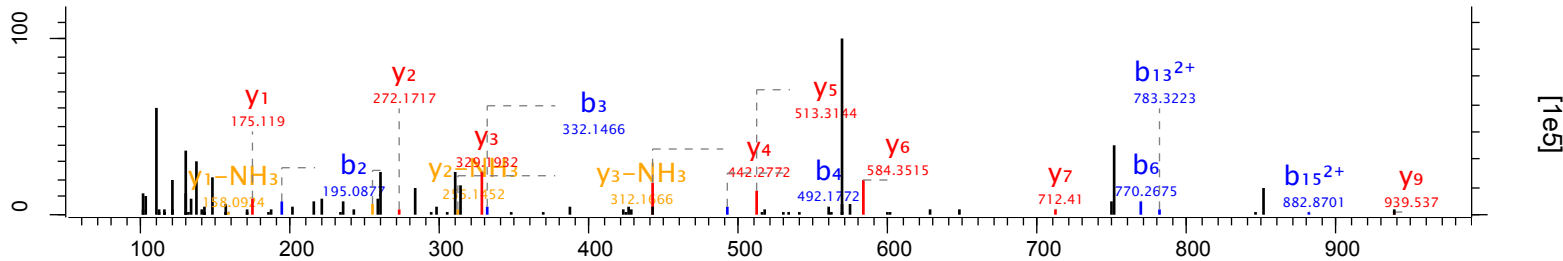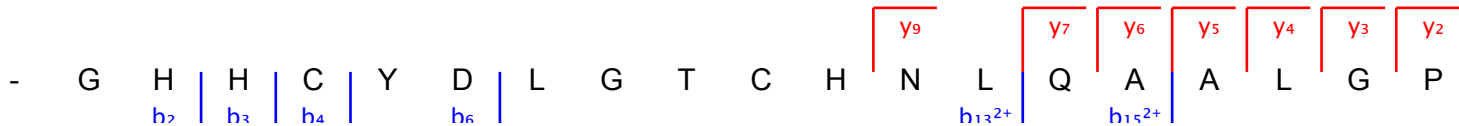

| Raw file                                      | Scan  | Method    | Score | m/z    | Gene names |
|-----------------------------------------------|-------|-----------|-------|--------|------------|
| 20120706_EXQ2_AtDe_SA_WTR_OG_pooled_final_2_9 | 25905 | FTMS; HCD | 42.06 | 625.98 | Ripk3      |

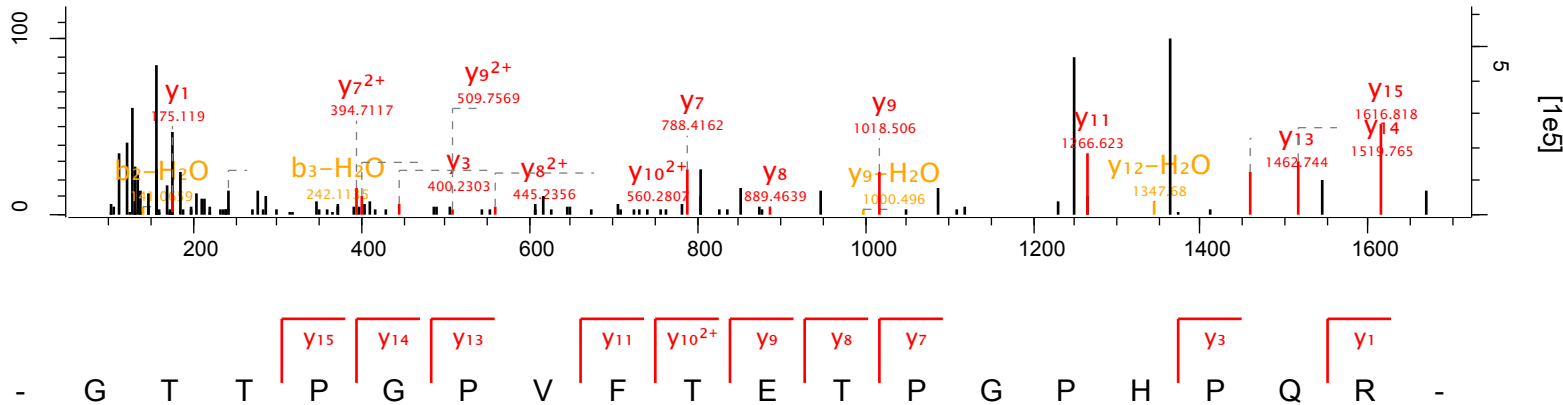

| Raw file                                      | Scan  | Method    | Score | m/z    | Gene names |
|-----------------------------------------------|-------|-----------|-------|--------|------------|
| 20120706_EXQ2_AtDe_SA_WTR_OG_pooled_final_2_9 | 33441 | FTMS; HCD | 92.86 | 383.47 | Clec11a    |

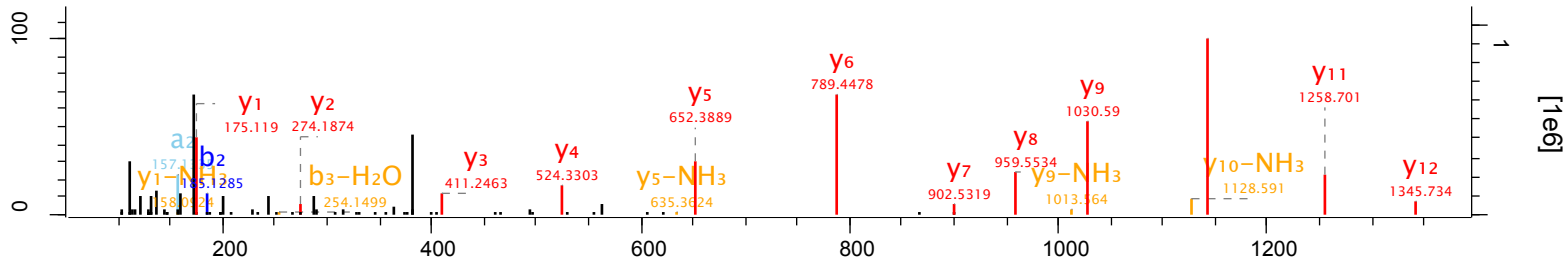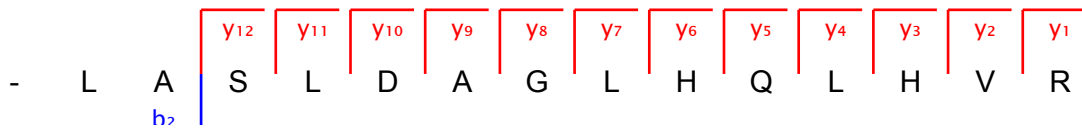



| Raw file                                      | Scan  | Method    | Score | m/z    | Gene names |
|-----------------------------------------------|-------|-----------|-------|--------|------------|
| 20120706_EXQ2_AtDe_SA_WTR_OG_pooled_final_2_9 | 33486 | FTMS; HCD | 42.47 | 510.58 | Clec11a    |

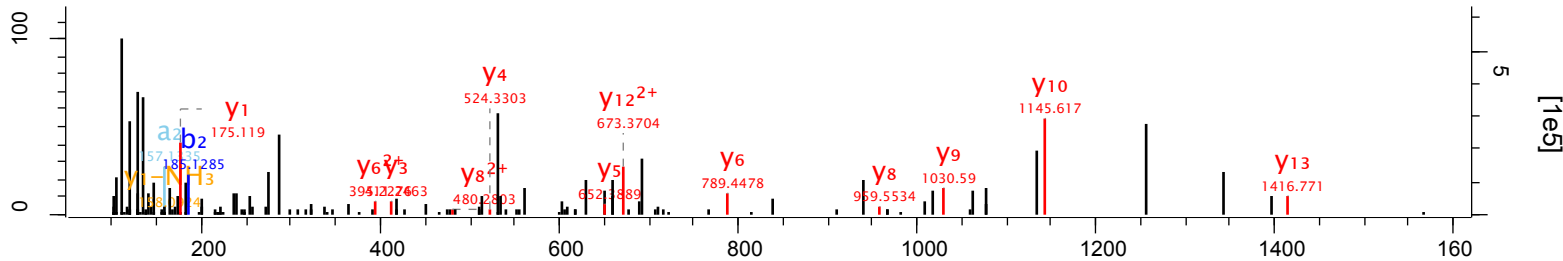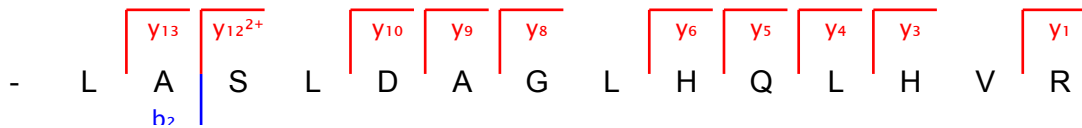

| Raw file                                      | Scan  | Method    | Score | m/z    | Gene names |
|-----------------------------------------------|-------|-----------|-------|--------|------------|
| 20120706_EXQ2_AtDe_SA_WTR_OG_pooled_final_2_9 | 39328 | FTMS; HCD | 53.77 | 613.33 | Scin       |

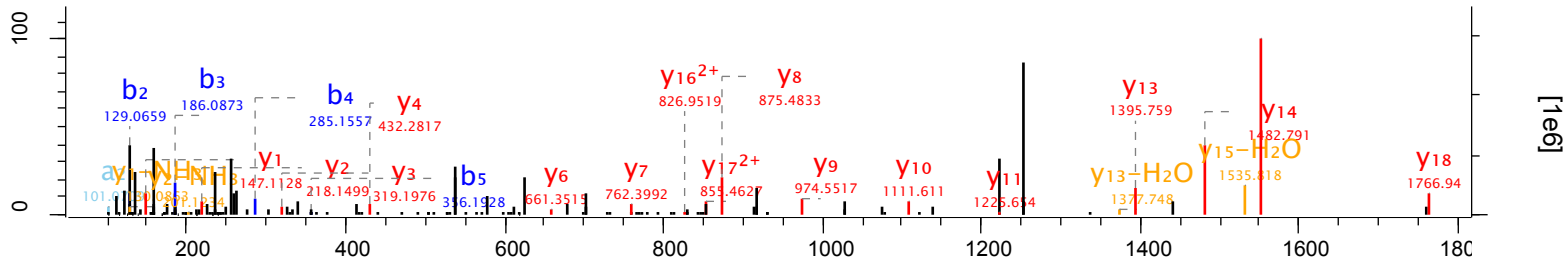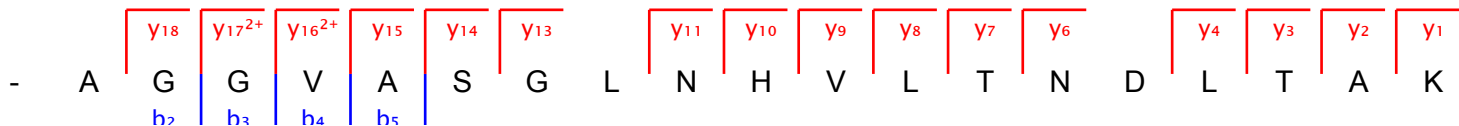

| Raw file                                      | Scan  | Method    | Score | m/z    | Gene names |
|-----------------------------------------------|-------|-----------|-------|--------|------------|
| 20120706_EXQ2_AtDe_SA_WTR_OG_pooled_final_2_9 | 43186 | FTMS; HCD | 58.32 | 496.63 | Dchs1      |

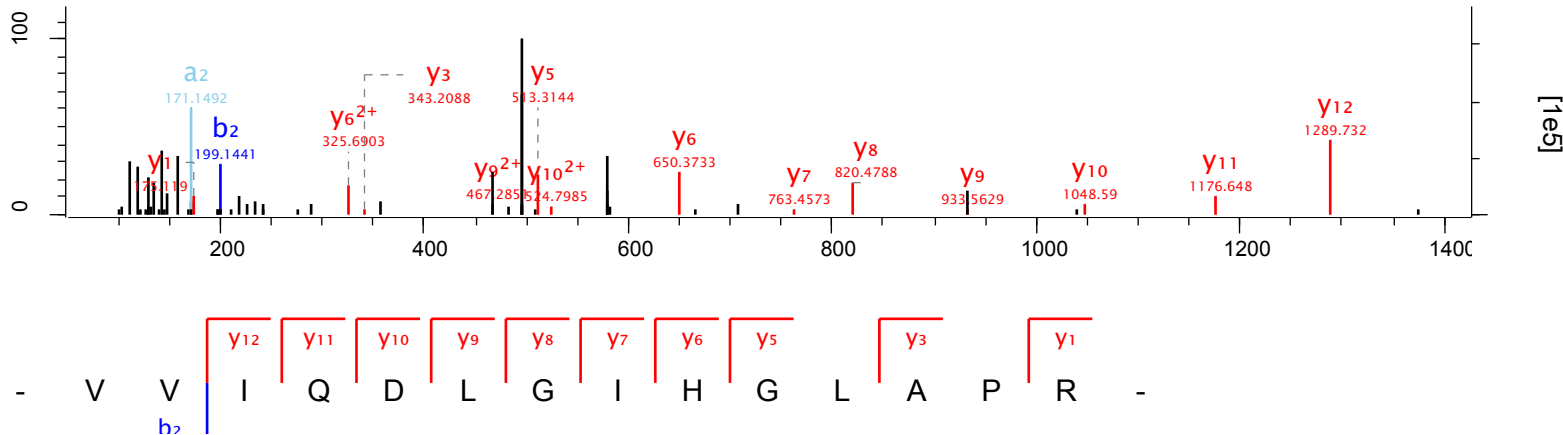

| Raw file                                      | Scan  | Method    | Score | m/z    | Gene names |
|-----------------------------------------------|-------|-----------|-------|--------|------------|
| 20120706_EXQ2_AtDe_SA_WTR_OG_pooled_final_2_9 | 51094 | FTMS; HCD | 34.43 | 482.62 | Znrf1      |

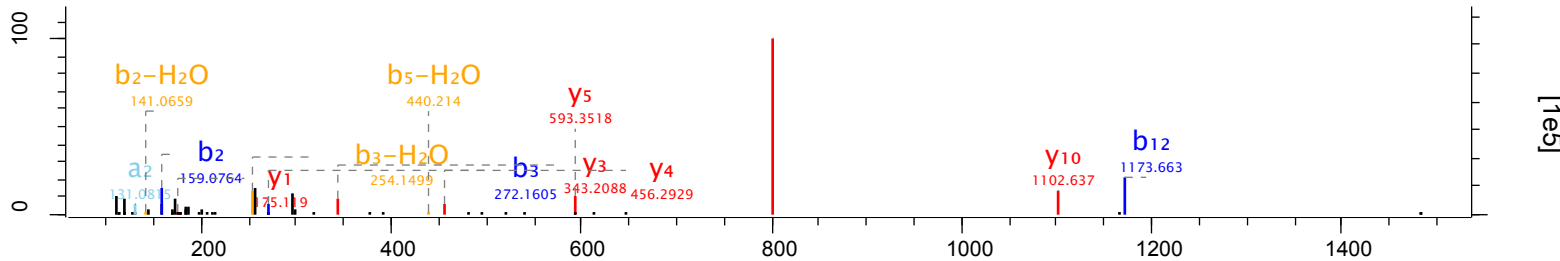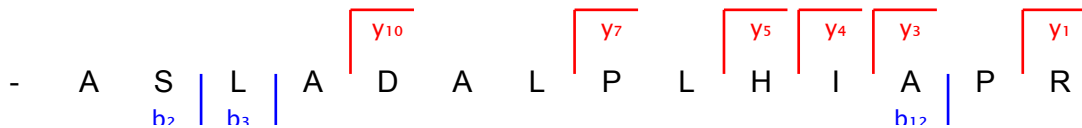

| Raw file                                      | Scan  | Method    | Score | m/z    | Gene names |
|-----------------------------------------------|-------|-----------|-------|--------|------------|
| 20120706_EXQ2_AtDe_SA_WTR_OG_pooled_final_2_9 | 52300 | FTMS; HCD | 45.61 | 578.66 | Mblac1     |

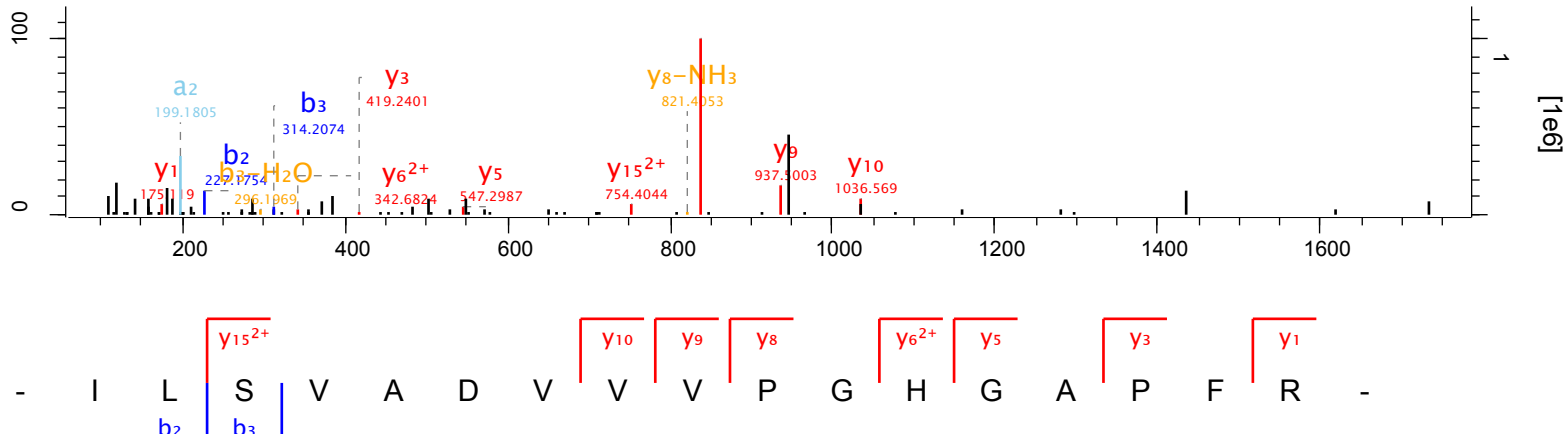

| Raw file                                      | Scan  | Method    | Score | m/z    | Gene names |
|-----------------------------------------------|-------|-----------|-------|--------|------------|
| 20120706_EXQ2_AtDe_SA_WTR_OG_pooled_final_2_9 | 59504 | FTMS; HCD | 38.67 | 609.58 | Pyurf      |

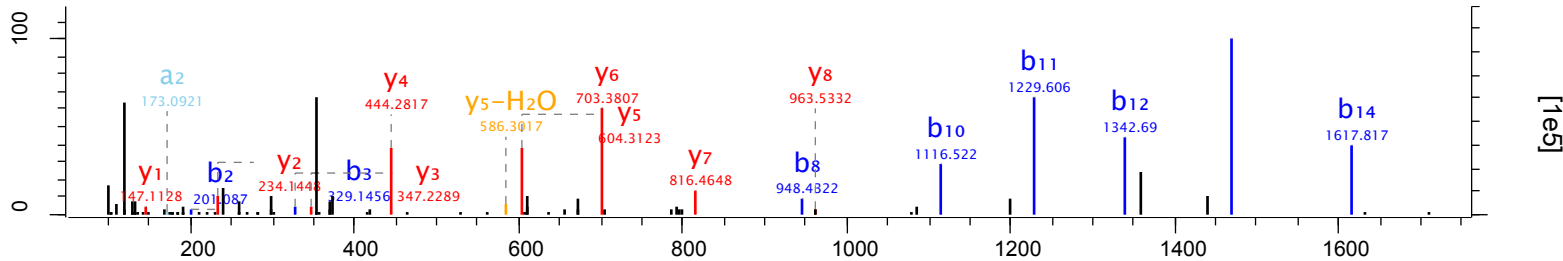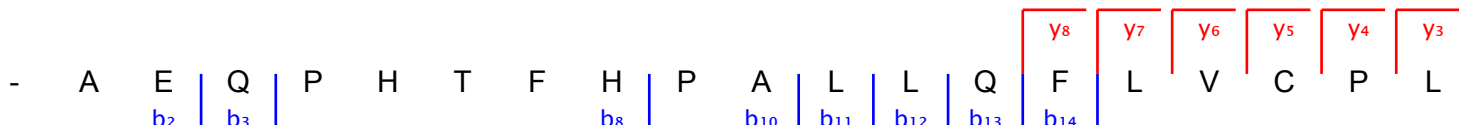

| Raw file                                      | Scan  | Method    | Score | m/z   | Gene names |
|-----------------------------------------------|-------|-----------|-------|-------|------------|
| 20120706_EXQ2_AtDe_SA_WTR_OG_pooled_final_2_9 | 59514 | FTMS; HCD | 41.62 | 812.1 | Pyurf      |

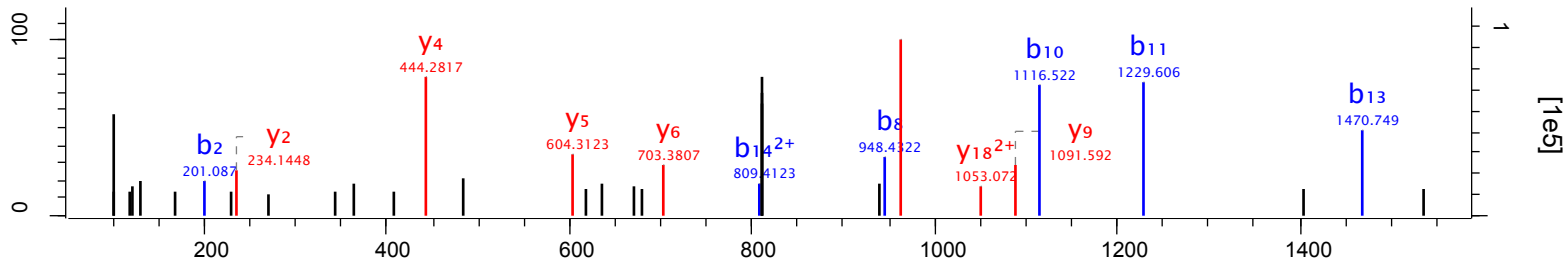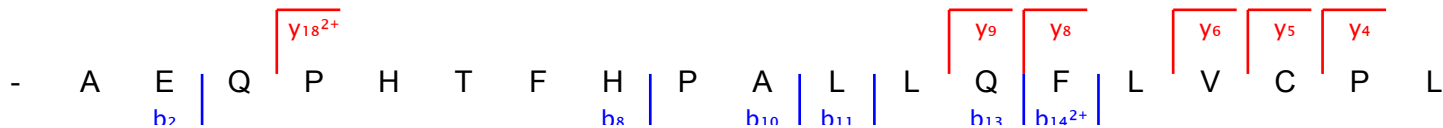

| Raw file                                      | Scan  | Method    | Score  | m/z    | Gene names |
|-----------------------------------------------|-------|-----------|--------|--------|------------|
| 20120720_EXQ2_AtDe_SA_WTR_OG_pooled_final_3_1 | 12345 | FTMS; HCD | 110.25 | 723.36 | Tmem100    |

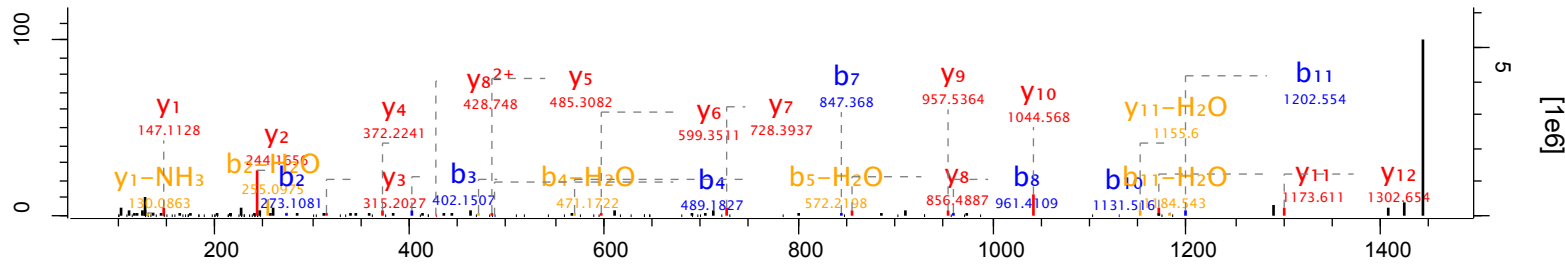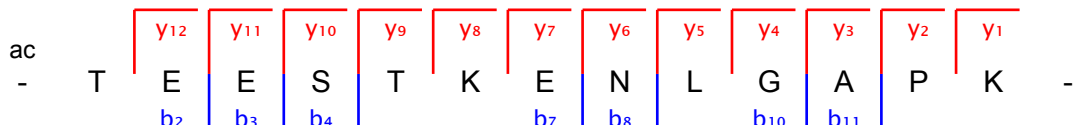



| Raw file                                      | Scan  | Method    | Score  | m/z    | Gene names |
|-----------------------------------------------|-------|-----------|--------|--------|------------|
| 20120720_EXQ2_AtDe_SA_WTR_OG_pooled_final_3_1 | 25760 | FTMS; HCD | 130.27 | 836.86 | mt-Nd3;Mtn |

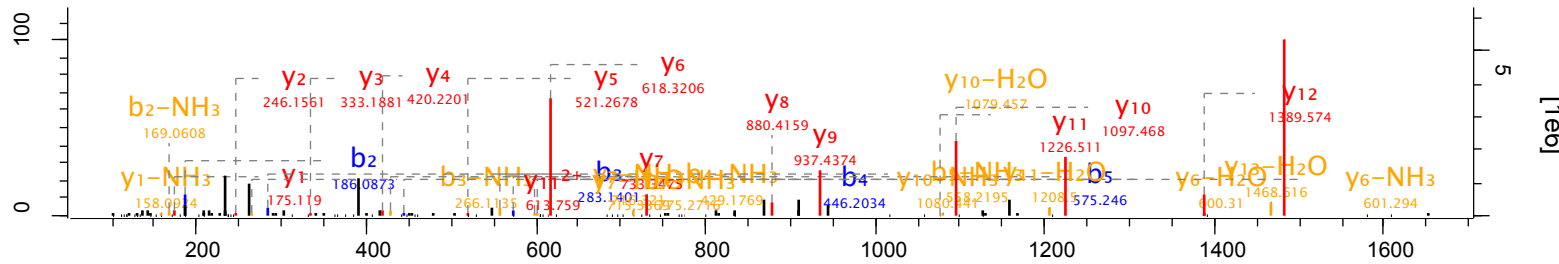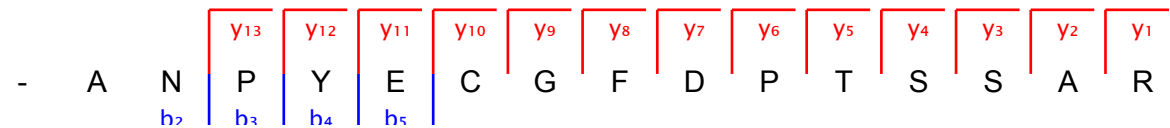

Raw file

20120720\_EXQ2\_AtDe\_SA\_WTR\_OG\_pooled\_final\_3\_1

Scan

36500

Method

FTMS; HCD

Score

87.99

m/z

715.39

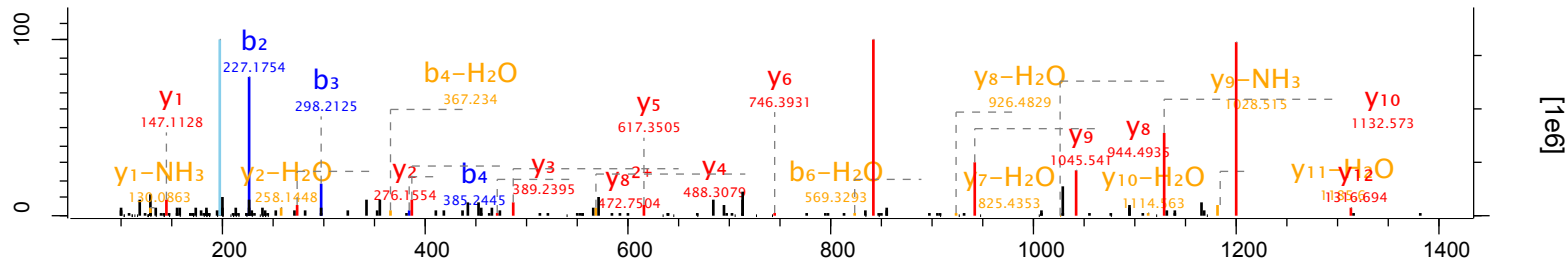

[1e6]

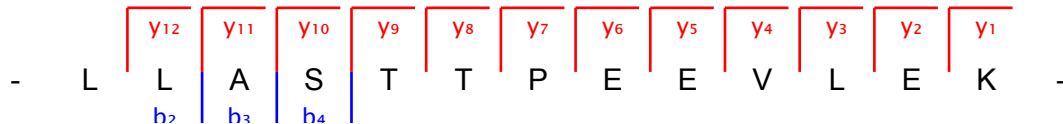

| Raw file                                      | Scan | Method    | Score  | m/z    | Gene names |
|-----------------------------------------------|------|-----------|--------|--------|------------|
| 20120720_EXQ2_AtDe_SA_WTR_OG_pooled_final_3_1 | 4562 | FTMS; HCD | 101.38 | 738.35 | Tdrd5      |

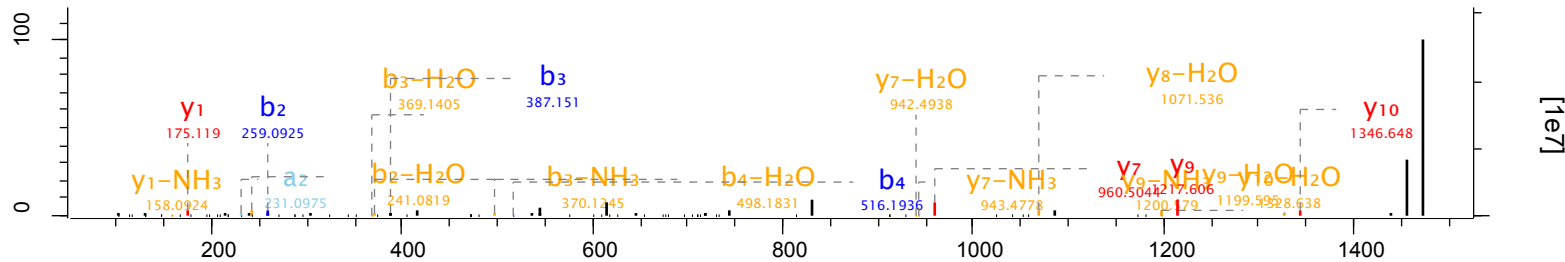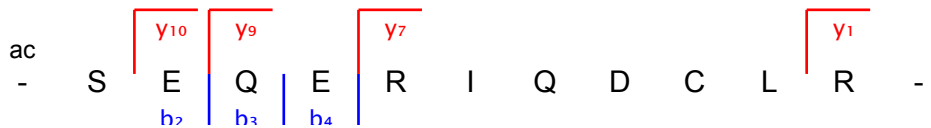

| Raw file                                      | Scan | Method    | Score  | m/z    | Gene names |
|-----------------------------------------------|------|-----------|--------|--------|------------|
| 20120720_EXQ2_AtDe_SA_WTR_OG_pooled_final_3_1 | 5999 | FTMS; HCD | 102.65 | 727.84 | Pcp41l     |

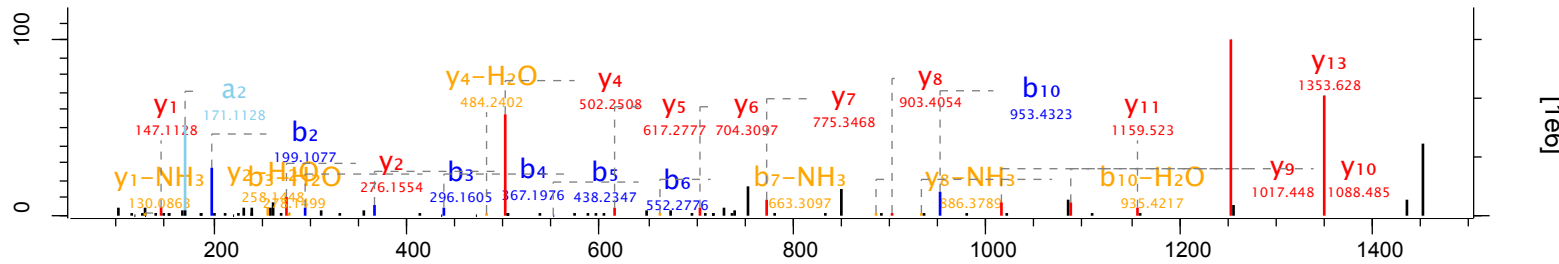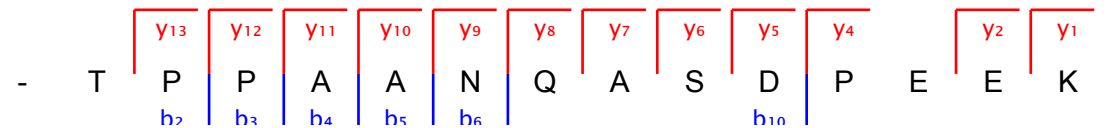

Raw file

20120720\_EXQ2\_AtDe\_SA\_WTR\_OG\_pooled\_final\_3\_1

Scan

64490

Method

FTMS; HCD

Score

209.89

m/z

949.49

Gene names

Tppp

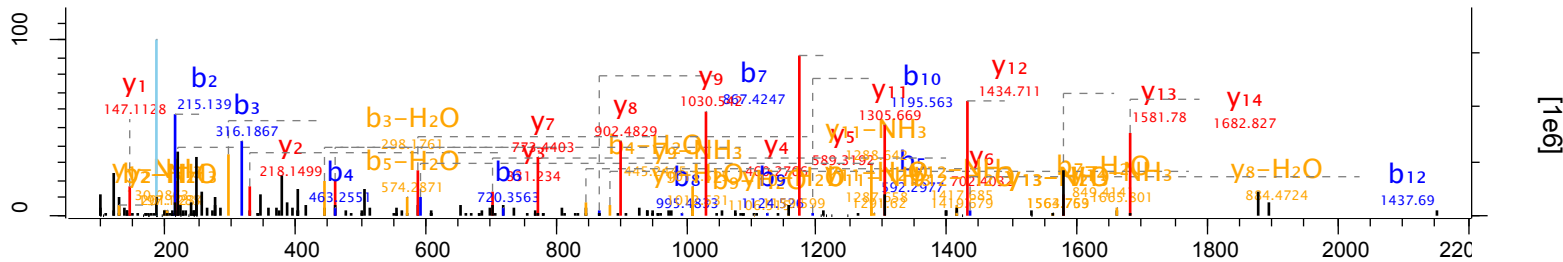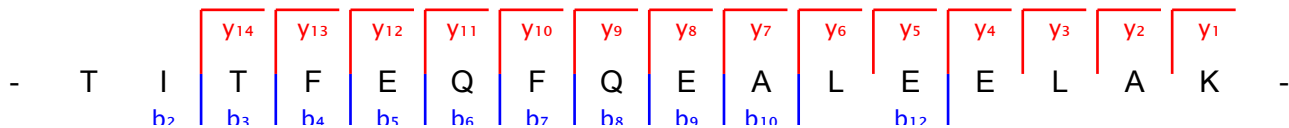

| Raw file                                      | Scan | Method    | Score | m/z    | Gene names |
|-----------------------------------------------|------|-----------|-------|--------|------------|
| 20120720_EXQ2_AtDe_SA_WTR_OG_pooled_final_3_1 | 7383 | FTMS; HCD | 76.22 | 542.77 | Rgs13      |

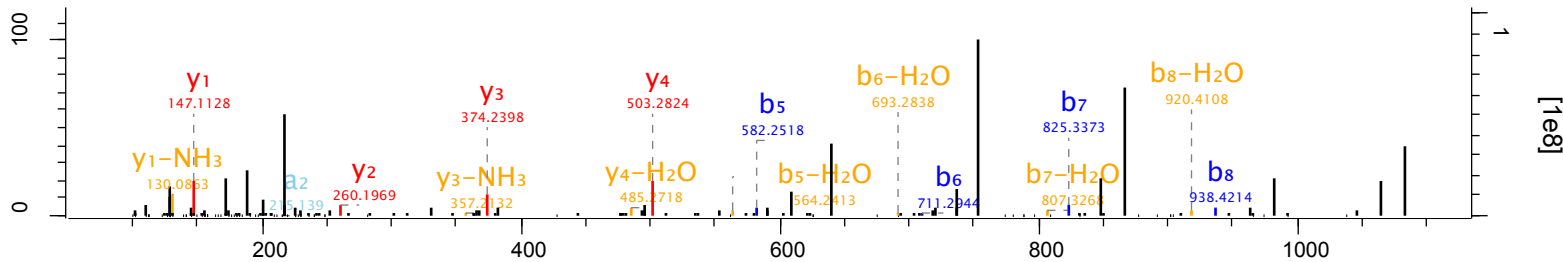

| Raw file                                       | Scan | Method    | Score | m/z    | Gene names  |
|------------------------------------------------|------|-----------|-------|--------|-------------|
| 20120720_EXQ2_AtDe_SA_WTR_OG_pooled_final_3_10 | 4287 | FTMS; HCD | 68.28 | 399.45 | mt-Co3;Mtco |

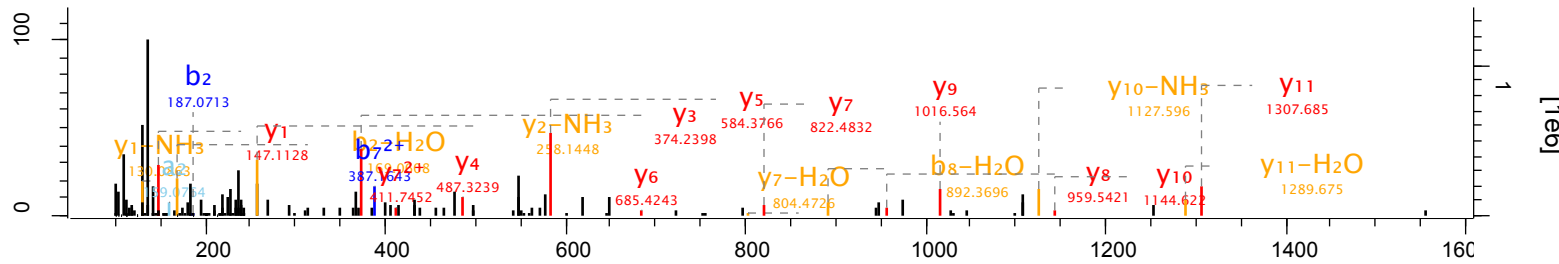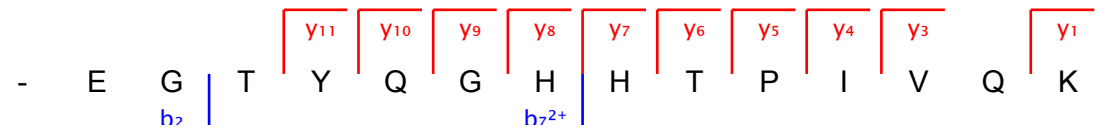

Raw file

Scan

Method

Score

m/z

20120720\_EXQ2\_AtDe\_SA\_WTR\_OG\_pooled\_final\_3\_11

11468

FTMS; HCD

72.19

536.79

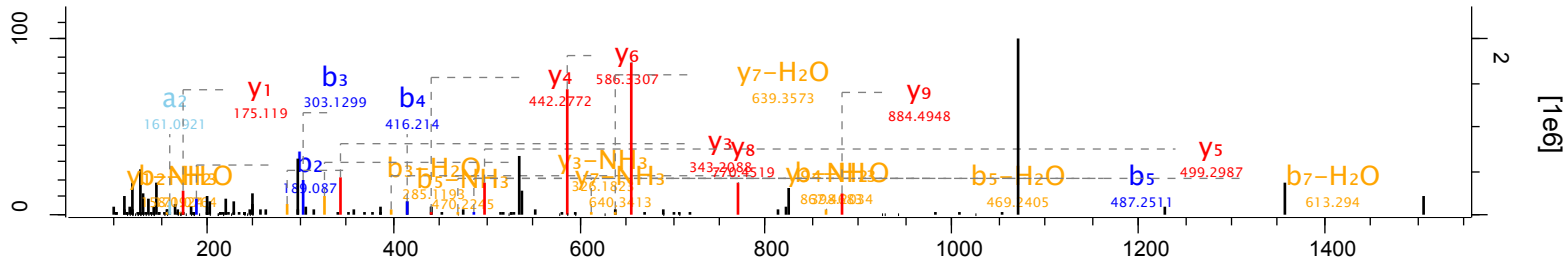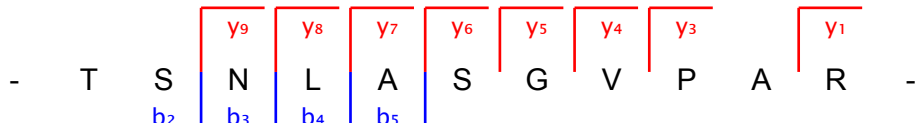



| Raw file                                       | Scan  | Method    | Score | m/z    | Gene names |
|------------------------------------------------|-------|-----------|-------|--------|------------|
| 20120720_EXQ2_AtDe_SA_WTR_OG_pooled_final_3_11 | 14802 | FTMS; HCD | 71.53 | 674.91 | Stap2      |

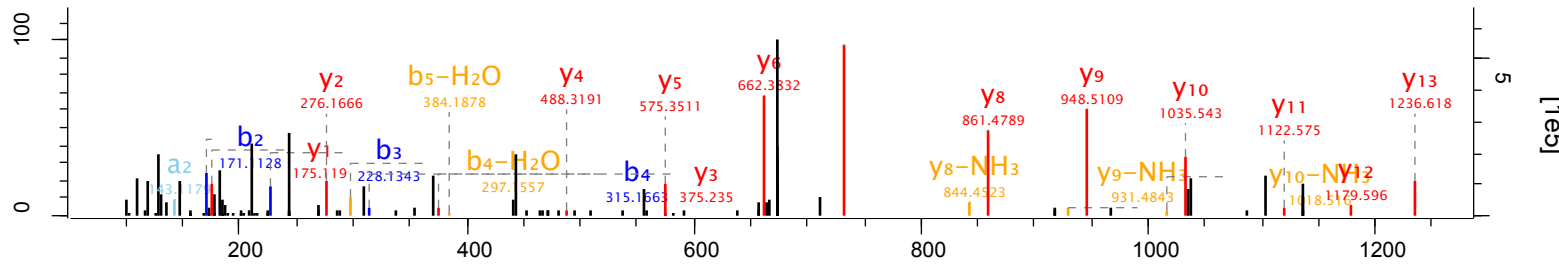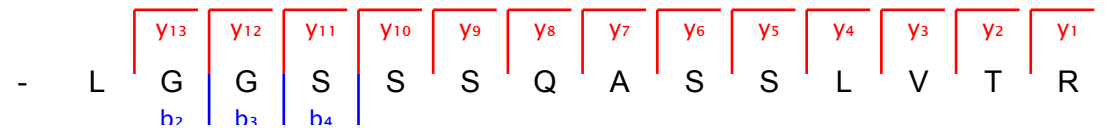

| Raw file                                       | Scan  | Method    | Score | m/z    | Gene names |
|------------------------------------------------|-------|-----------|-------|--------|------------|
| 20120720_EXQ2_AtDe_SA_WTR_OG_pooled_final_3_11 | 25490 | FTMS; HCD | 78.96 | 778.44 | Fam184b    |

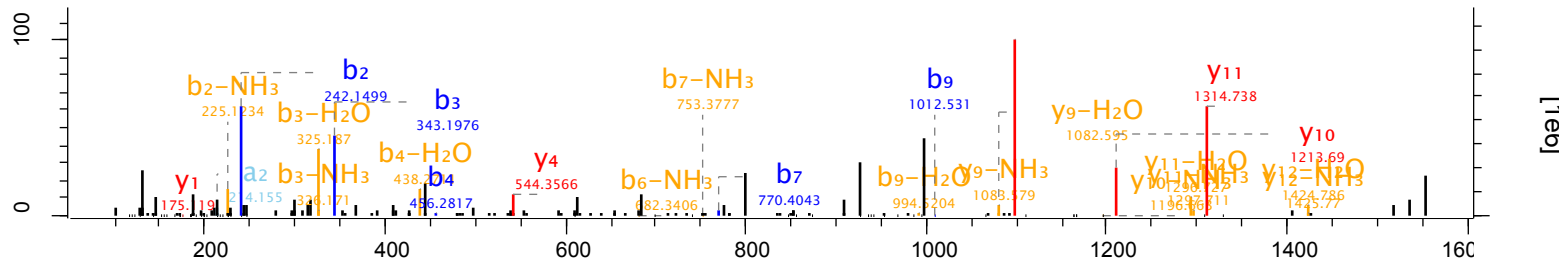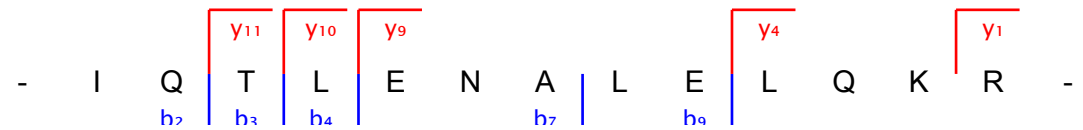

| Raw file                                       | Scan  | Method    | Score | m/z   | Gene names |
|------------------------------------------------|-------|-----------|-------|-------|------------|
| 20120720_EXQ2_AtDe_SA_WTR_OG_pooled_final_3_11 | 29711 | FTMS; HCD | 79.32 | 578.3 | Fap        |

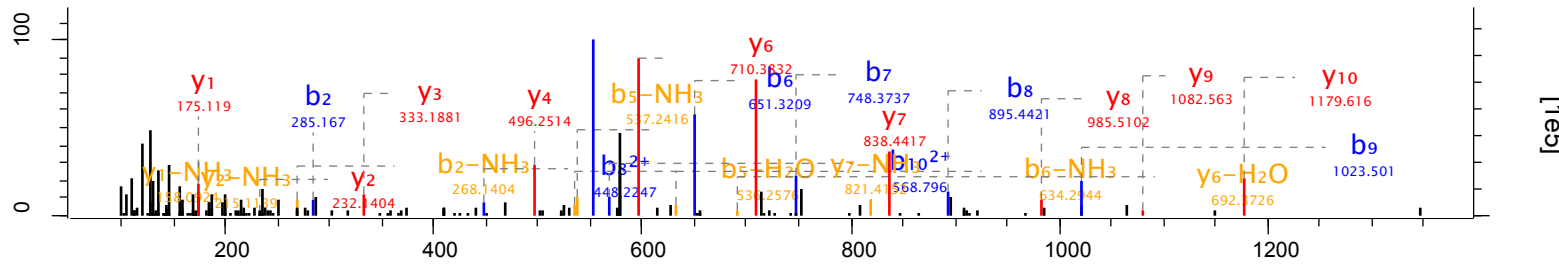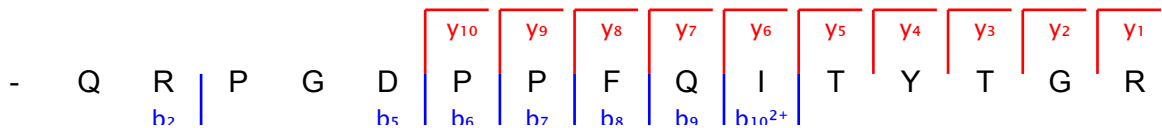

| Raw file                                       | Scan  | Method    | Score | m/z   | Gene names |
|------------------------------------------------|-------|-----------|-------|-------|------------|
| 20120720_EXQ2_AtDe_SA_WTR_OG_pooled_final_3_11 | 33040 | FTMS; HCD | 106.6 | 508.8 | Yipf7      |

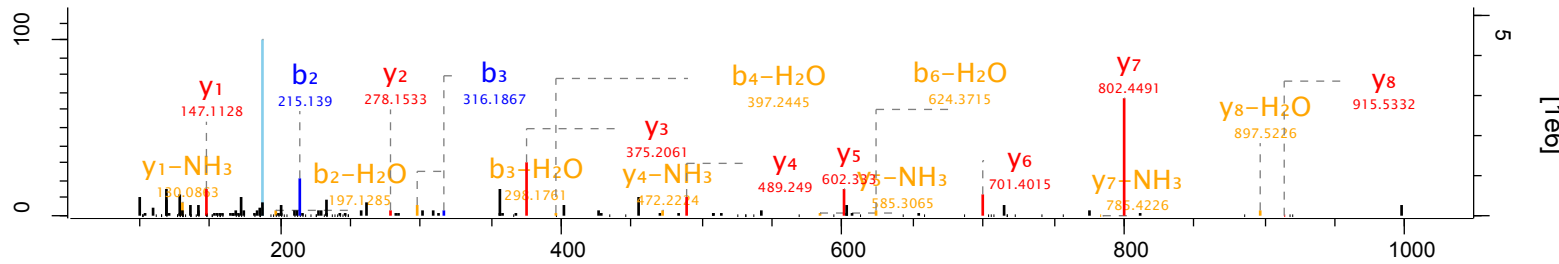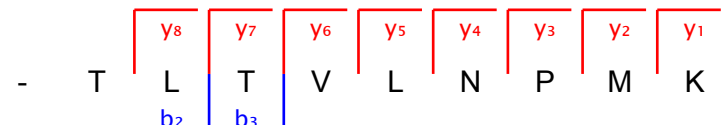

| Raw file                                       | Scan  | Method    | Score | m/z    | Gene names |
|------------------------------------------------|-------|-----------|-------|--------|------------|
| 20120720_EXQ2_AtDe_SA_WTR_OG_pooled_final_3_11 | 41849 | FTMS; HCD | 73.28 | 880.99 | Krtcap2    |

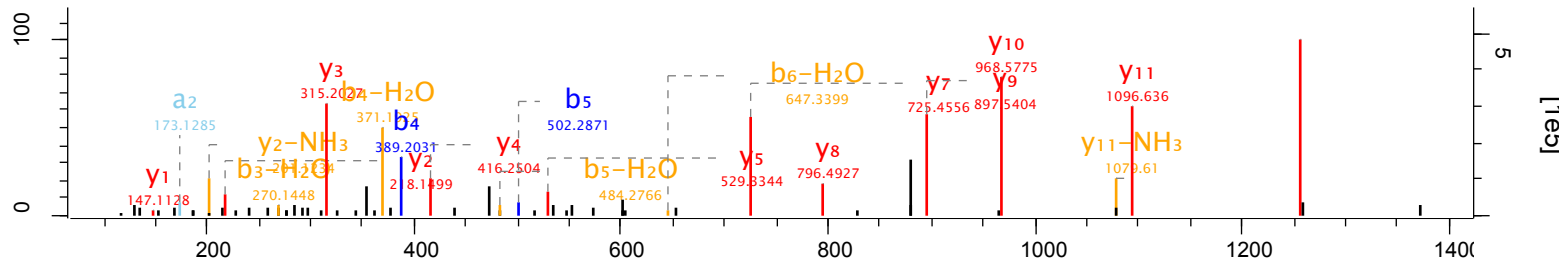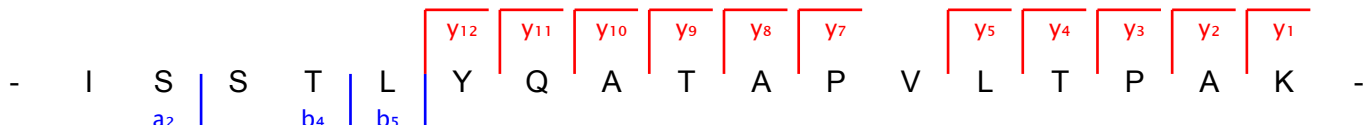

| Raw file                                       | Scan  | Method    | Score | m/z   | Gene names |
|------------------------------------------------|-------|-----------|-------|-------|------------|
| 20120720_EXQ2_AtDe_SA_WTR_OG_pooled_final_3_11 | 41979 | FTMS; HCD | 99.14 | 518.8 | Rhag       |

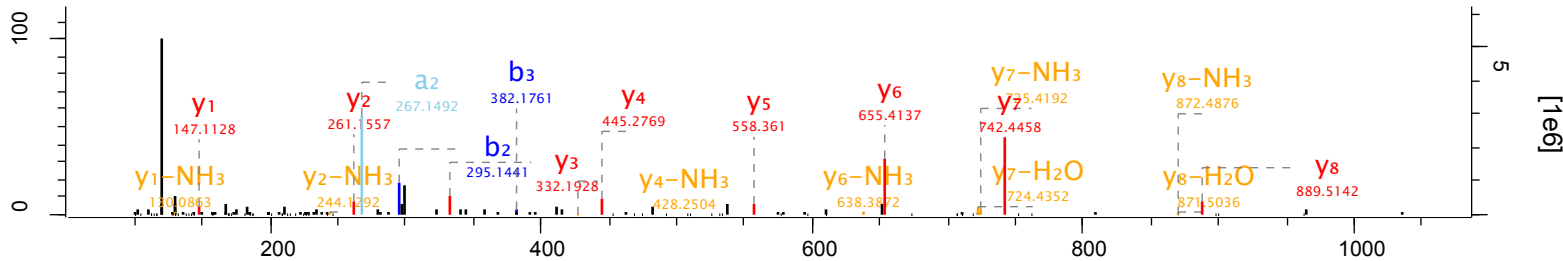

| Raw file                                       | Scan  | Method    | Score | m/z    | Gene names |
|------------------------------------------------|-------|-----------|-------|--------|------------|
| 20120720_EXQ2_AtDe_SA_WTR_OG_pooled_final_3_11 | 49913 | FTMS; HCD | 43.35 | 758.07 | PIIp       |

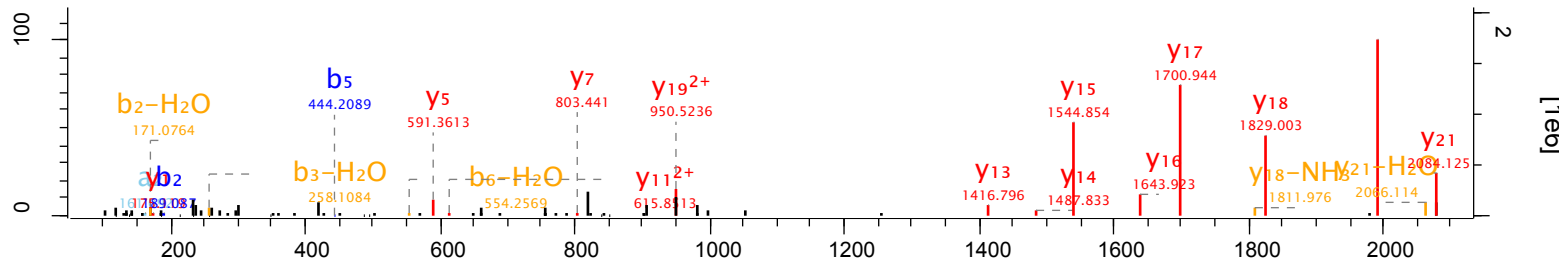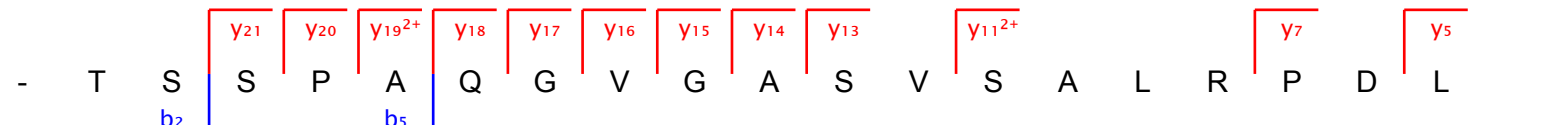

| Raw file                                       | Scan  | Method    | Score | m/z    | Gene names |
|------------------------------------------------|-------|-----------|-------|--------|------------|
| 20120720_EXQ2_AtDe_SA_WTR_OG_pooled_final_3_11 | 53442 | FTMS; HCD | 81.66 | 791.45 | Eln        |

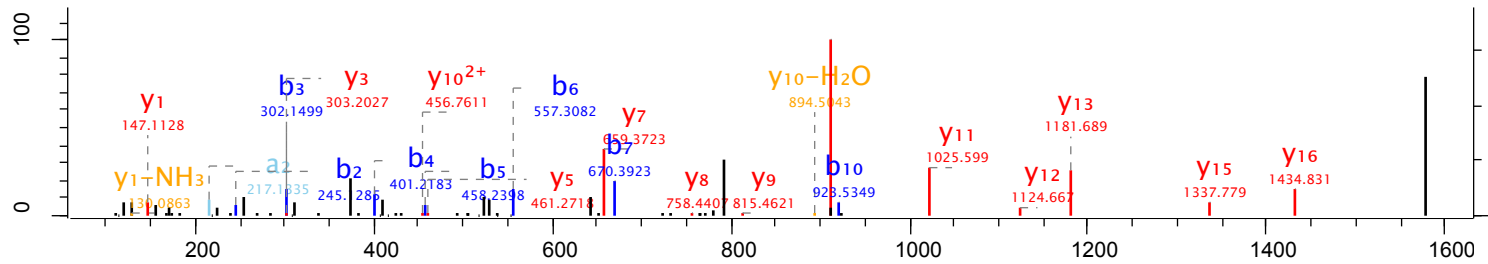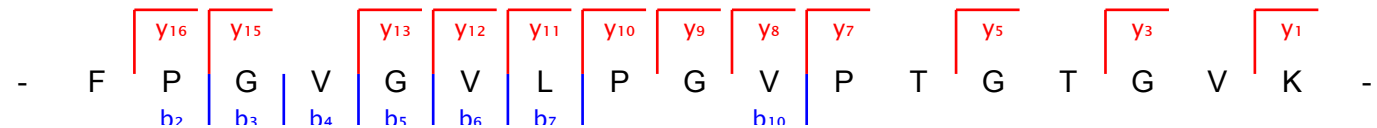



Raw file

Scan

Method

Score

m/z

20120720\_EXQ2\_AtDe\_SA\_WTR\_OG\_pooled\_final\_3\_12

10096

FTMS; HCD

72.85

536.79

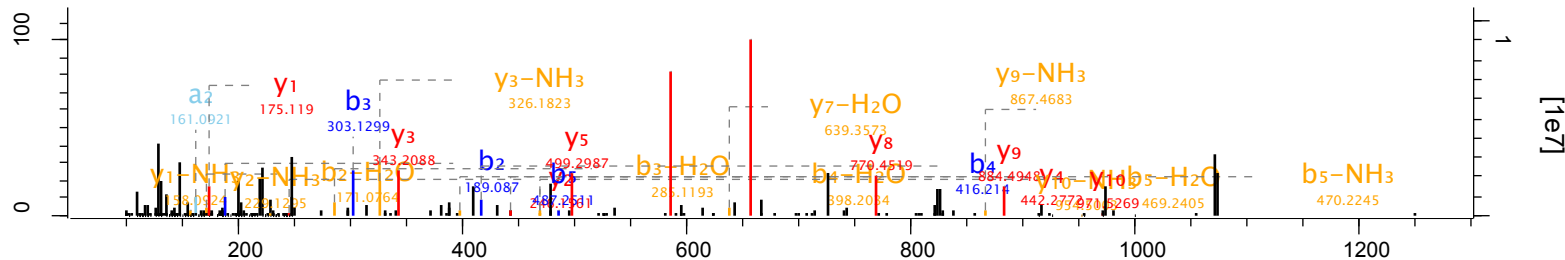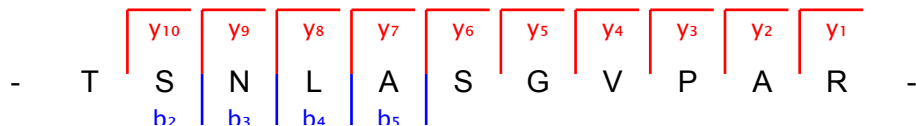

Raw file

Scan

Method

Score

m/z

20120720\_EXQ2\_AtDe\_SA\_WTR\_OG\_pooled\_final\_3\_12

11217

FTMS; HCD

150.27

534.78

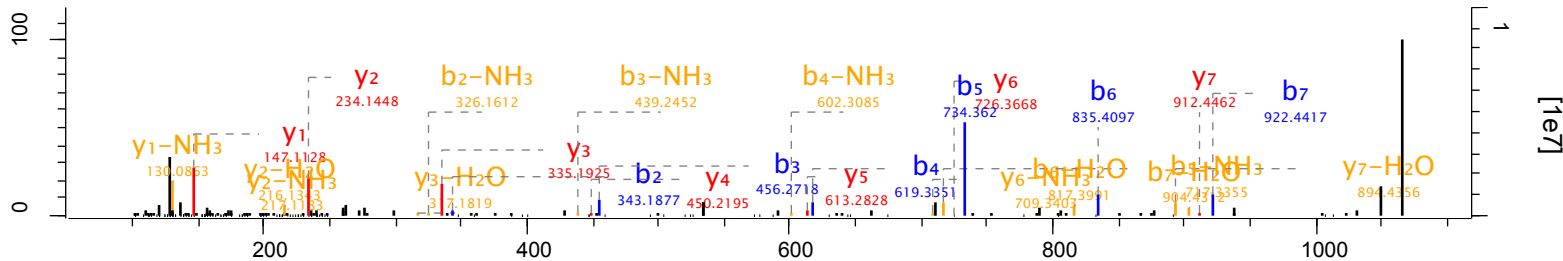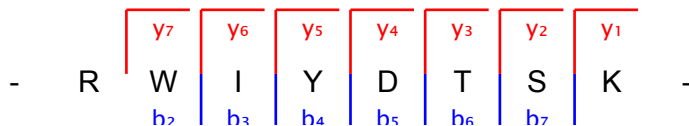

| Raw file                                       | Scan  | Method    | Score | m/z    | Gene names |
|------------------------------------------------|-------|-----------|-------|--------|------------|
| 20120720_EXQ2_AtDe_SA_WTR_OG_pooled_final_3_12 | 16175 | FTMS; HCD | 98.05 | 391.22 | Ndufa4l2   |

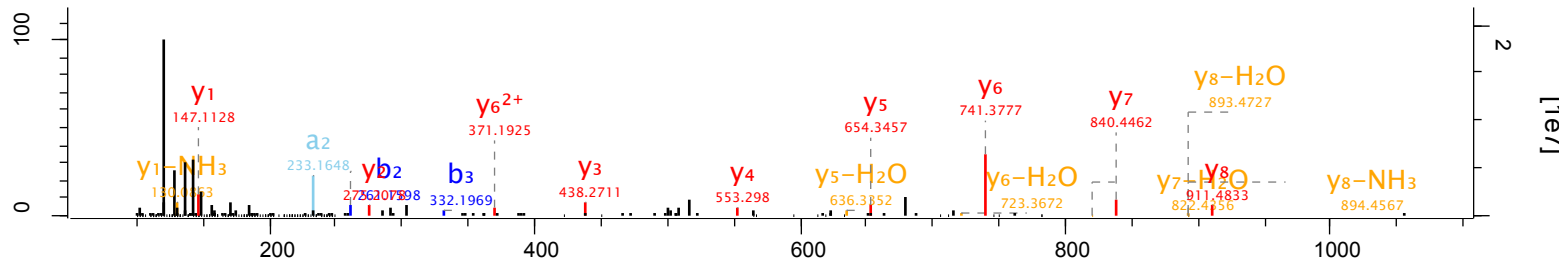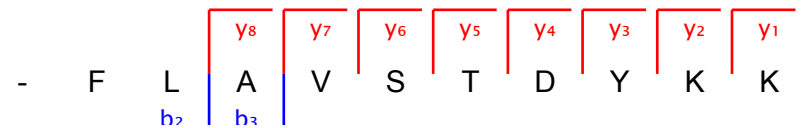

Raw file

Scan

Method

Score

m/z

20120720\_EXQ2\_AtDe\_SA\_WTR\_OG\_pooled\_final\_3\_12

21919

FTMS; HCD

121.56

651.82

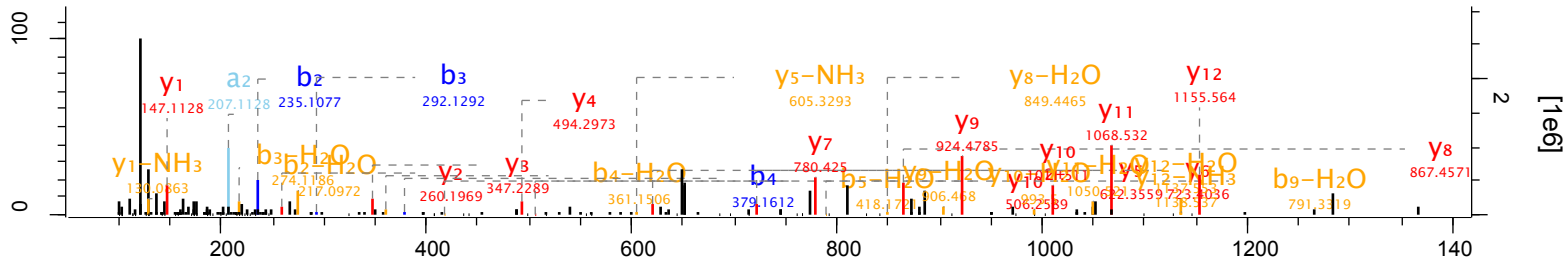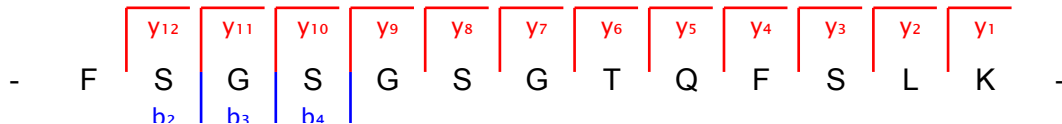

| Raw file                                       | Scan  | Method    | Score | m/z    | Gene names |
|------------------------------------------------|-------|-----------|-------|--------|------------|
| 20120720_EXQ2_AtDe_SA_WTR_OG_pooled_final_3_12 | 21975 | FTMS; HCD | 130.2 | 763.87 | Lysmd1     |

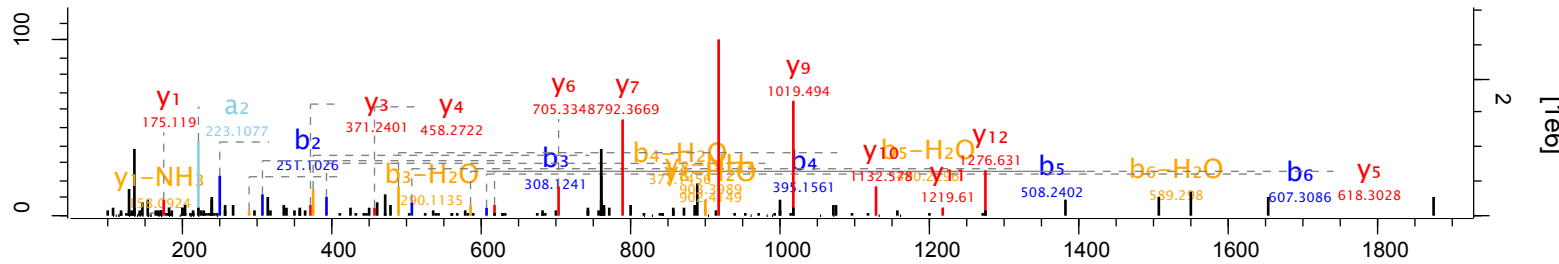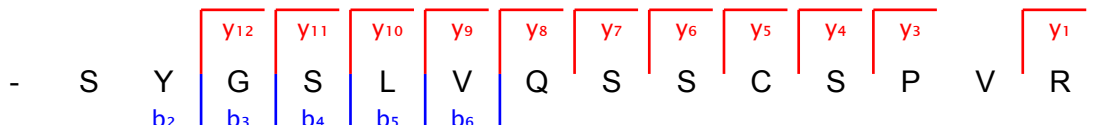

| Raw file                                       | Scan  | Method    | Score | m/z    | Gene names |
|------------------------------------------------|-------|-----------|-------|--------|------------|
| 20120720_EXQ2_AtDe_SA_WTR_OG_pooled_final_3_12 | 22286 | FTMS; HCD | 96.95 | 587.83 | Syngn2     |

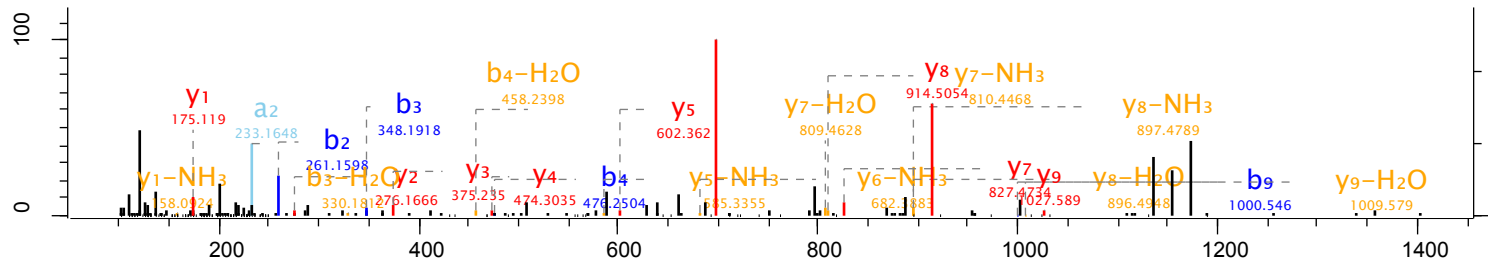

[1e7]

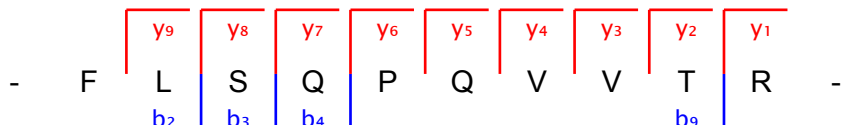

| Raw file                                       | Scan  | Method    | Score  | m/z    | Gene name |
|------------------------------------------------|-------|-----------|--------|--------|-----------|
| 20120720_EXQ2_AtDe_SA_WTR_OG_pooled_final_3_12 | 29088 | FTMS; HCD | 121.82 | 578.63 | Fap       |

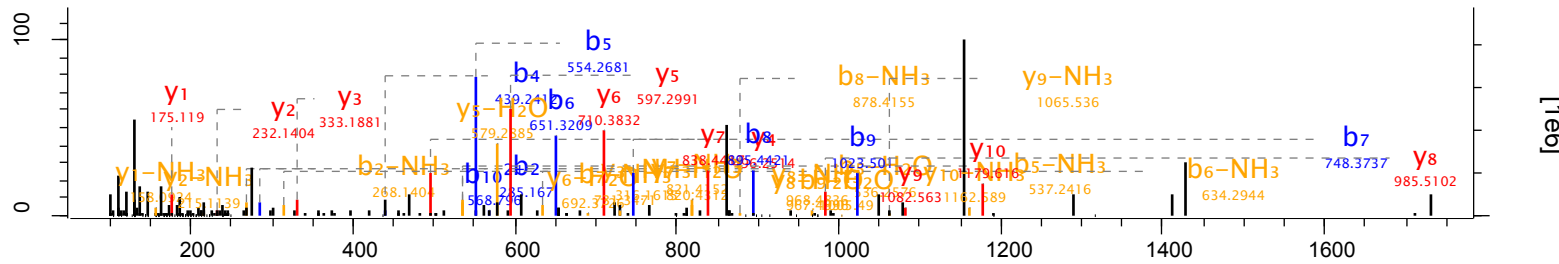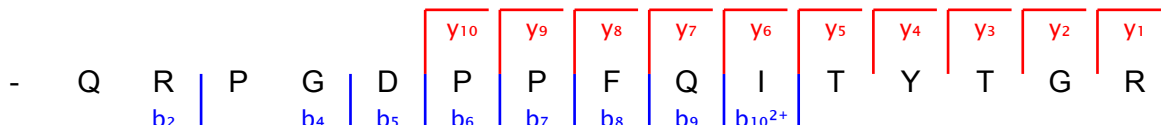

| Raw file                                       | Scan  | Method    | Score | m/z   | Gene names |
|------------------------------------------------|-------|-----------|-------|-------|------------|
| 20120720_EXQ2_AtDe_SA_WTR_OG_pooled_final_3_12 | 33832 | FTMS; HCD | 54.9  | 739.4 | Gdf7       |

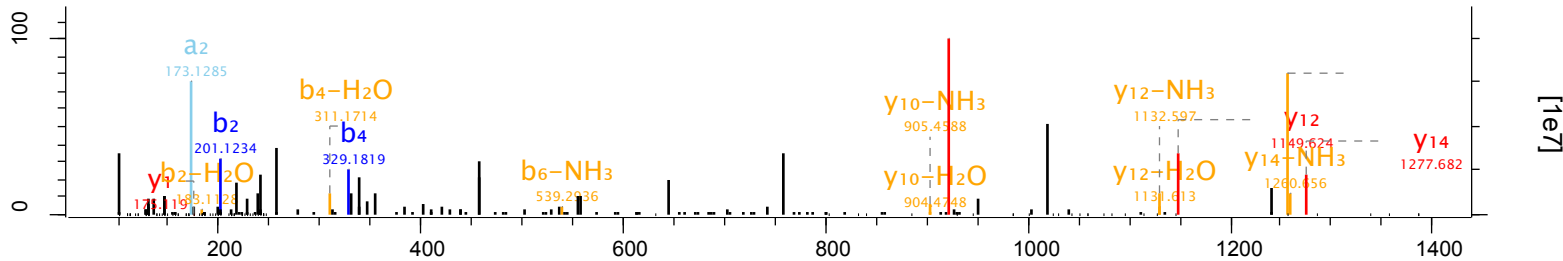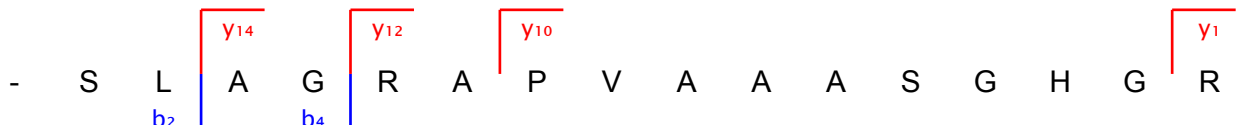



| Raw file                                       | Scan  | Method    | Score | m/z   | Gene names |
|------------------------------------------------|-------|-----------|-------|-------|------------|
| 20120720_EXQ2_AtDe_SA_WTR_OG_pooled_final_3_12 | 41688 | FTMS; HCD | 83.25 | 881.5 | Krtcap2    |

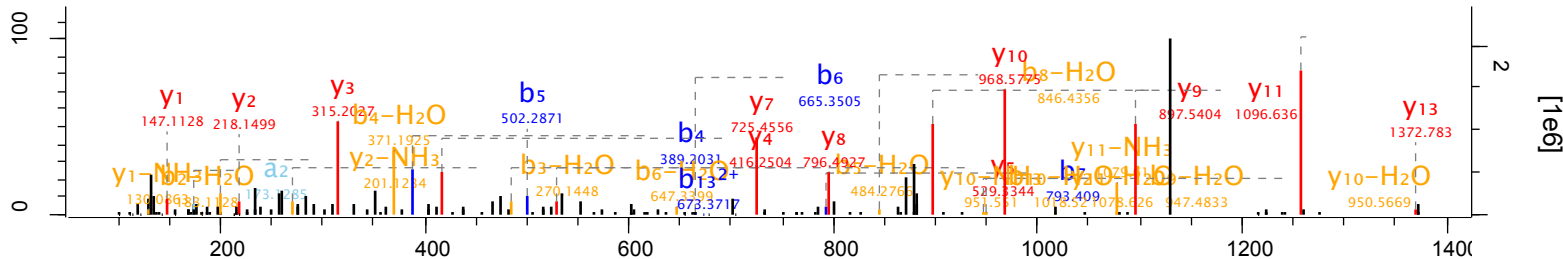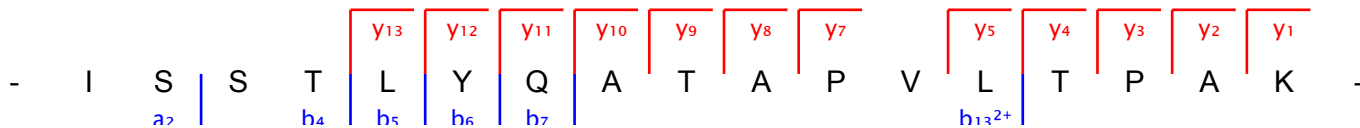

| Raw file                                       | Scan  | Method    | Score | m/z    | Gene names |
|------------------------------------------------|-------|-----------|-------|--------|------------|
| 20120720_EXQ2_AtDe_SA_WTR_OG_pooled_final_3_12 | 41815 | FTMS; HCD | 66.3  | 518.79 | Rhag       |

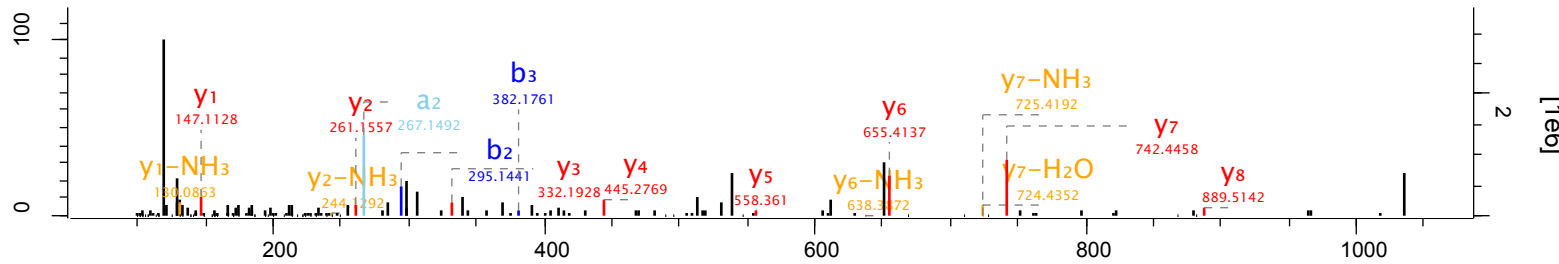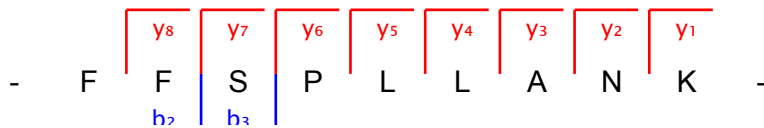

| Raw file                                       | Scan  | Method    | Score | m/z    | Gene names |
|------------------------------------------------|-------|-----------|-------|--------|------------|
| 20120720_EXQ2_AtDe_SA_WTR_OG_pooled_final_3_12 | 43934 | FTMS; HCD | 75.76 | 766.89 | Ncf4       |

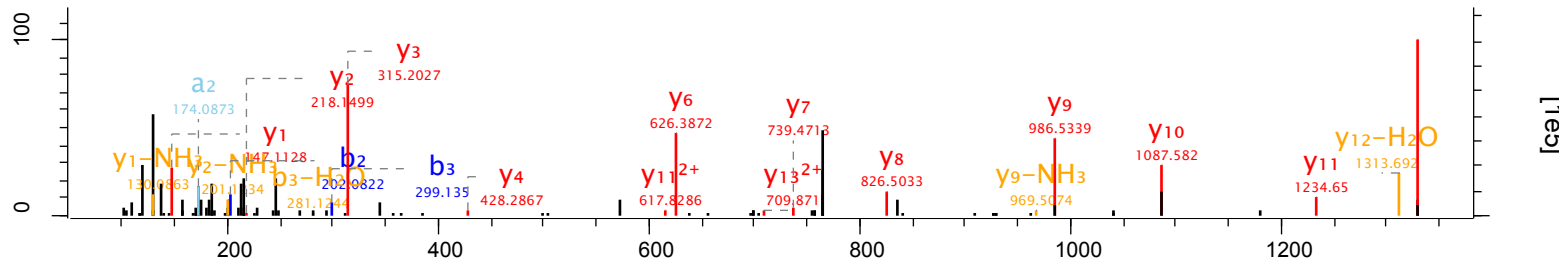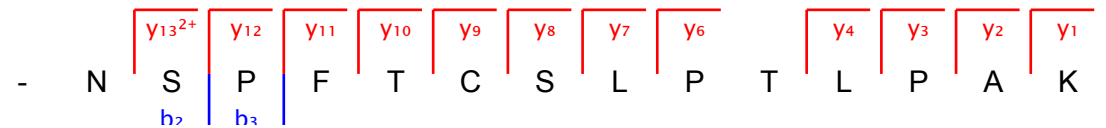

| Raw file                                       | Scan  | Method    | Score | m/z    | Gene names |
|------------------------------------------------|-------|-----------|-------|--------|------------|
| 20120720_EXQ2_AtDe_SA_WTR_OG_pooled_final_3_12 | 44978 | FTMS; HCD | 66.27 | 602.84 | Kctd12b    |

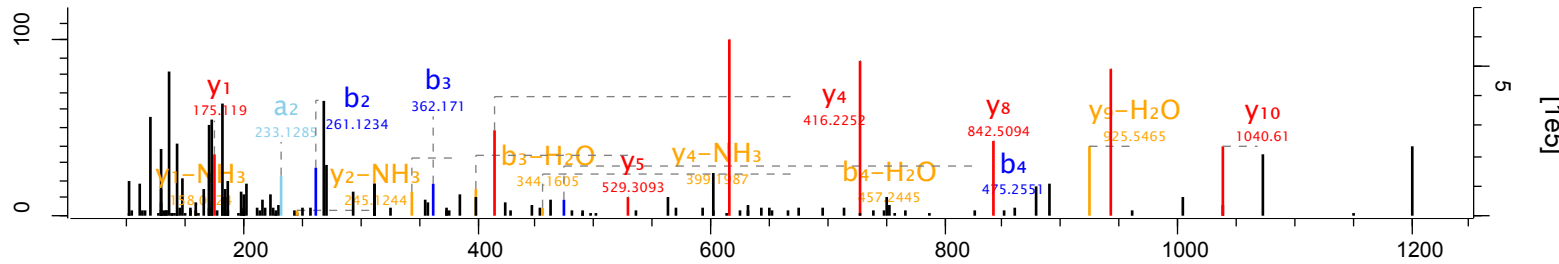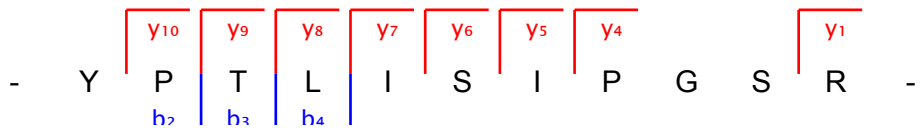

| Raw file                                       | Scan  | Method    | Score | m/z    | Gene names |
|------------------------------------------------|-------|-----------|-------|--------|------------|
| 20120720_EXQ2_AtDe_SA_WTR_OG_pooled_final_3_12 | 49836 | FTMS; HCD | 94.38 | 758.07 | PIIp       |

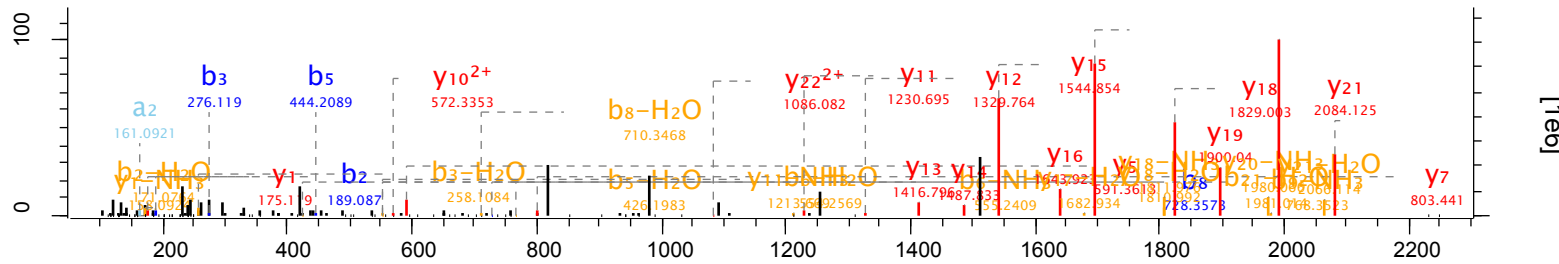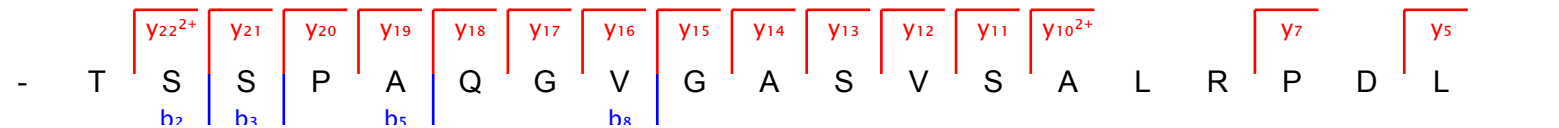

| Raw file                                       | Scan  | Method    | Score | m/z    | Gene names |
|------------------------------------------------|-------|-----------|-------|--------|------------|
| 20120720_EXQ2_AtDe_SA_WTR_OG_pooled_final_3_12 | 53527 | FTMS; HCD | 75.02 | 791.95 | Eln        |

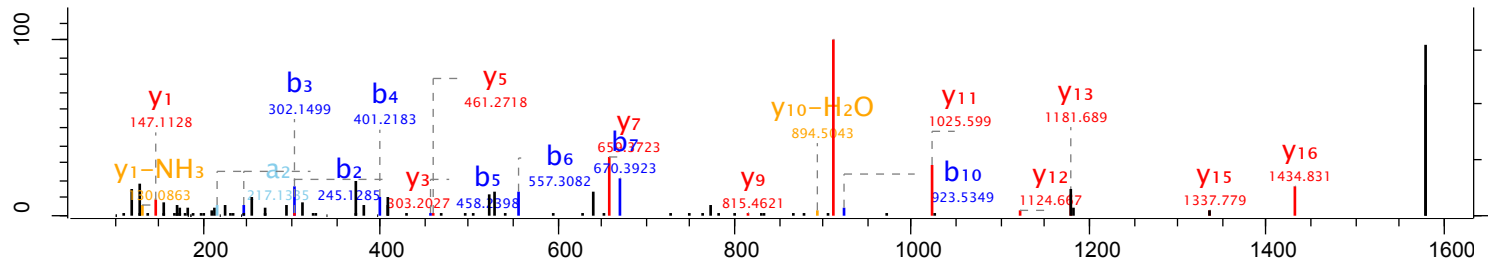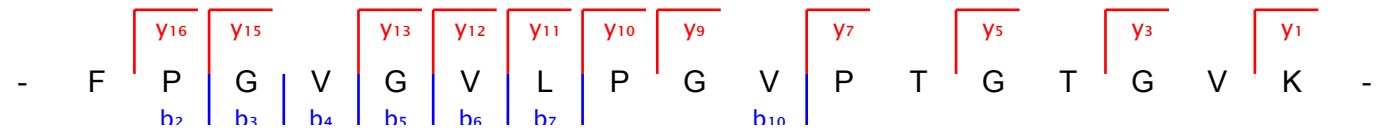

[1e6]

| Raw file                                      | Scan  | Method    | Score  | m/z    | Gene names |
|-----------------------------------------------|-------|-----------|--------|--------|------------|
| 20120720_EXQ2_AtDe_SA_WTR_OG_pooled_final_3_2 | 15725 | FTMS; HCD | 121.21 | 710.35 | C1qb       |

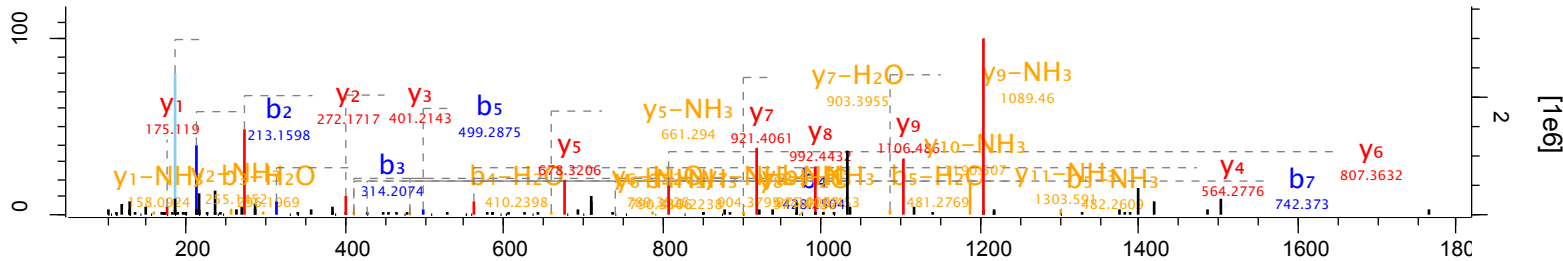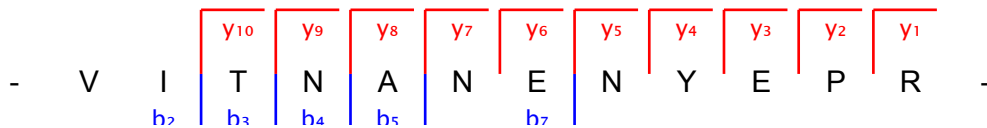

| Raw file                                      | Scan  | Method    | Score | m/z    | Gene names |
|-----------------------------------------------|-------|-----------|-------|--------|------------|
| 20120720_EXQ2_AtDe_SA_WTR_OG_pooled_final_3_2 | 34617 | FTMS; HCD | 94.41 | 438.75 | II11       |

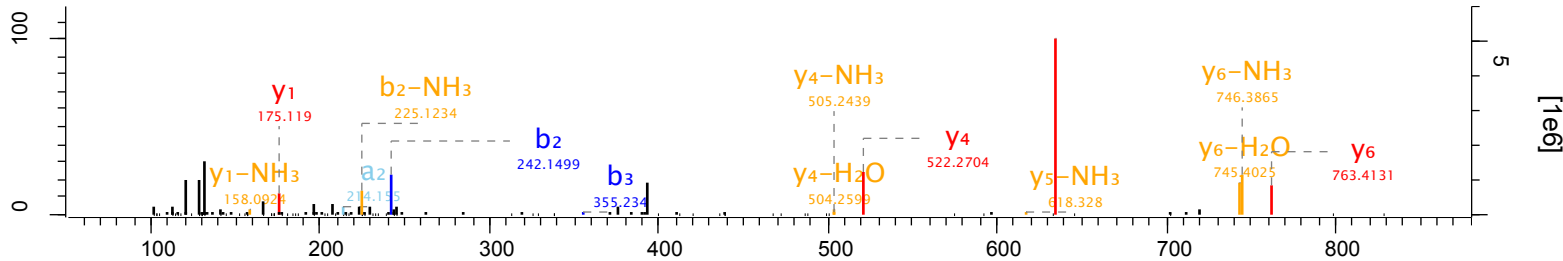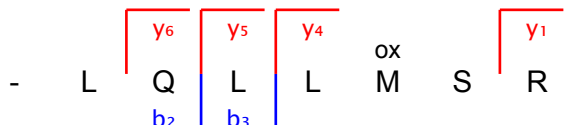



| Raw file                                      | Scan  | Method    | Score | m/z    | Gene names |
|-----------------------------------------------|-------|-----------|-------|--------|------------|
| 20120720_EXQ2_AtDe_SA_WTR_OG_pooled_final_3_2 | 37344 | FTMS; HCD | 78.94 | 589.31 | Ccdc176    |

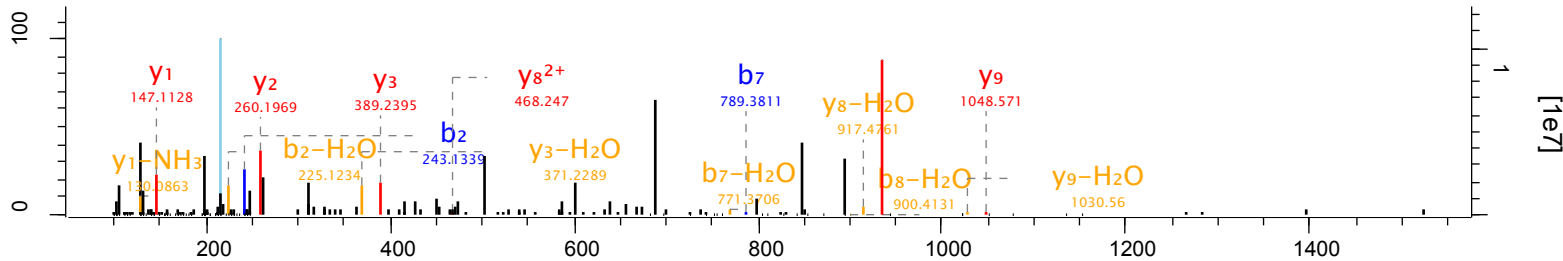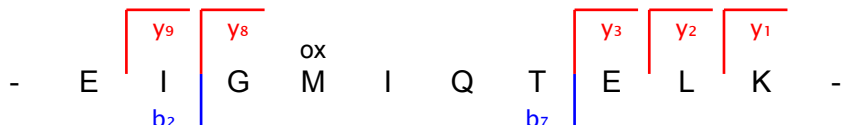

| Raw file                                      | Scan | Method    | Score  | m/z    | Gene names |
|-----------------------------------------------|------|-----------|--------|--------|------------|
| 20120720_EXQ2_AtDe_SA_WTR_OG_pooled_final_3_2 | 6217 | FTMS; HCD | 112.84 | 613.79 | Sepw1      |

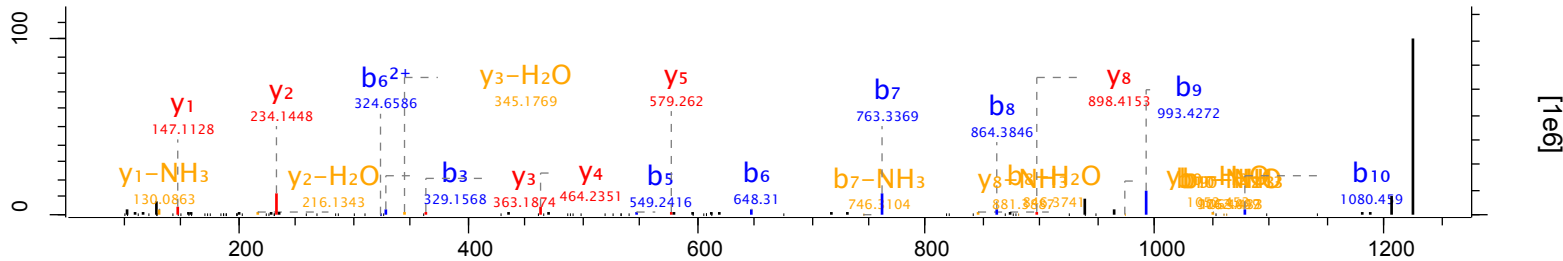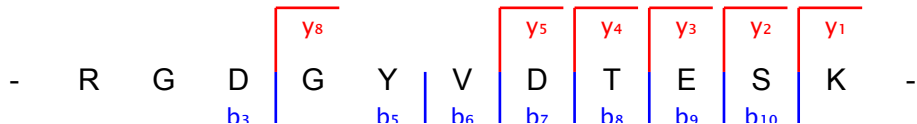

| Raw file                                      | Scan  | Method    | Score | m/z   | Gene names |
|-----------------------------------------------|-------|-----------|-------|-------|------------|
| 20120720_EXQ2_AtDe_SA_WTR_OG_pooled_final_3_2 | 64631 | FTMS; HCD | 95.62 | 805.4 | Ly6a       |

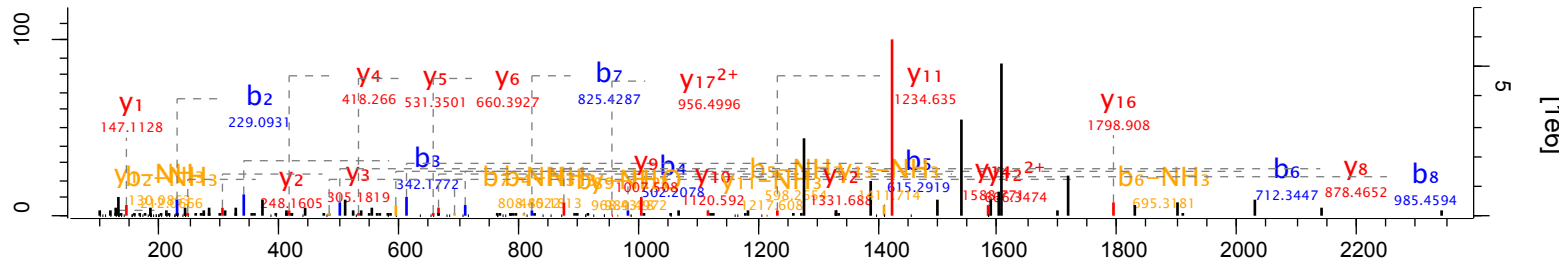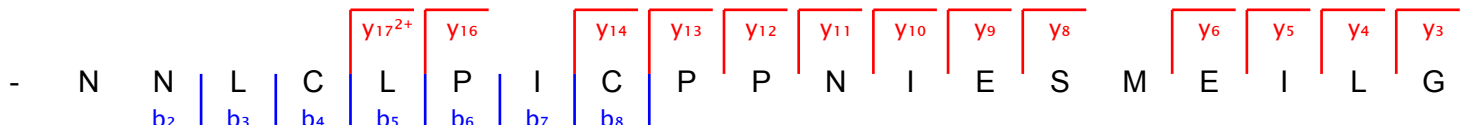

| Raw file                                      | Scan  | Method    | Score | m/z    | Gene names |
|-----------------------------------------------|-------|-----------|-------|--------|------------|
| 20120720_EXQ2_AtDe_SA_WTR_OG_pooled_final_3_2 | 64638 | FTMS; HCD | 96.63 | 1207.1 | Ly6a       |

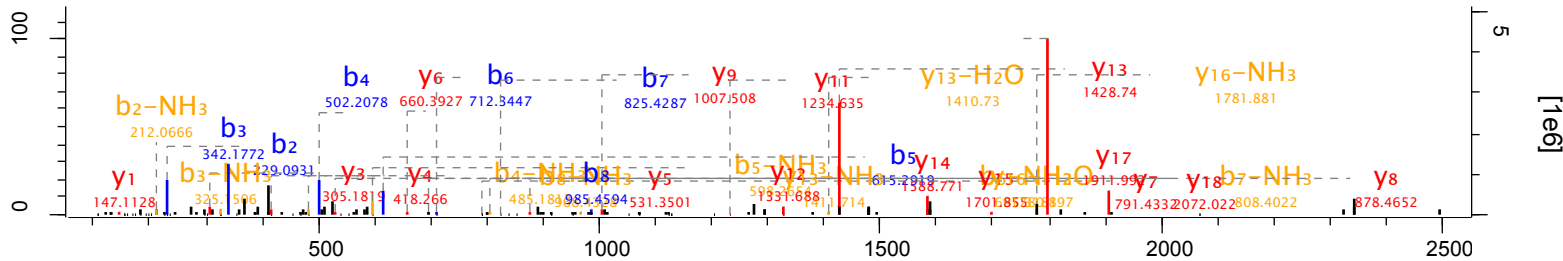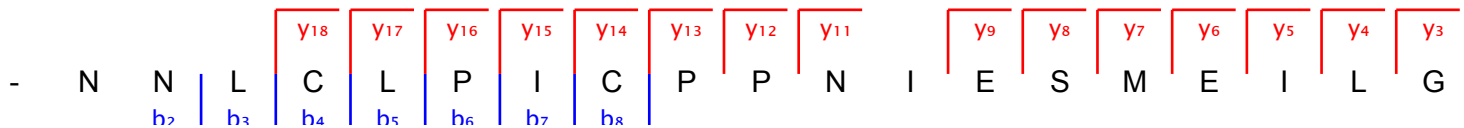

| Raw file                                      | Scan | Method    | Score | m/z    | Gene names |
|-----------------------------------------------|------|-----------|-------|--------|------------|
| 20120720_EXQ2_AtDe_SA_WTR_OG_pooled_final_3_2 | 9764 | FTMS; HCD | 80.45 | 542.77 | Rgs13      |

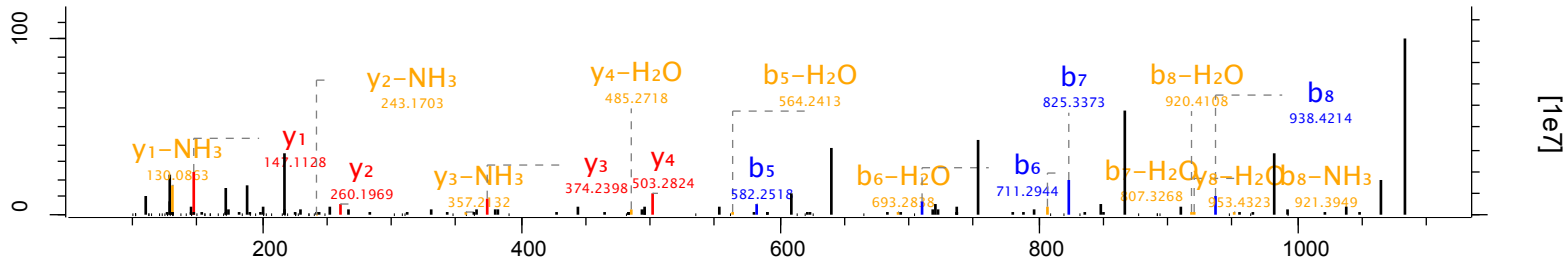

| Raw file                                      | Scan  | Method    | Score  | m/z    | Gene names |
|-----------------------------------------------|-------|-----------|--------|--------|------------|
| 20120720_EXQ2_AtDe_SA_WTR_OG_pooled_final_3_3 | 14943 | FTMS; HCD | 124.29 | 696.33 | Flg2       |

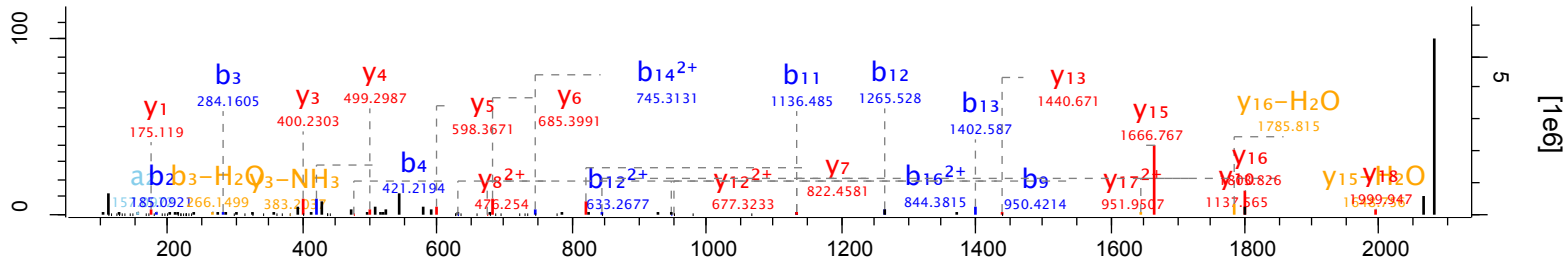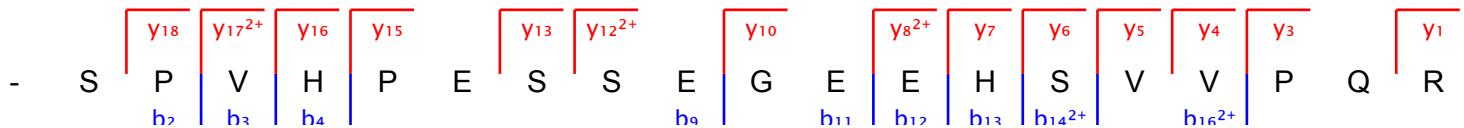

| Raw file                                      | Scan  | Method    | Score | m/z    | Gene names |
|-----------------------------------------------|-------|-----------|-------|--------|------------|
| 20120720_EXQ2_AtDe_SA_WTR_OG_pooled_final_3_3 | 26387 | FTMS; HCD | 67.95 | 380.46 | Gng11      |

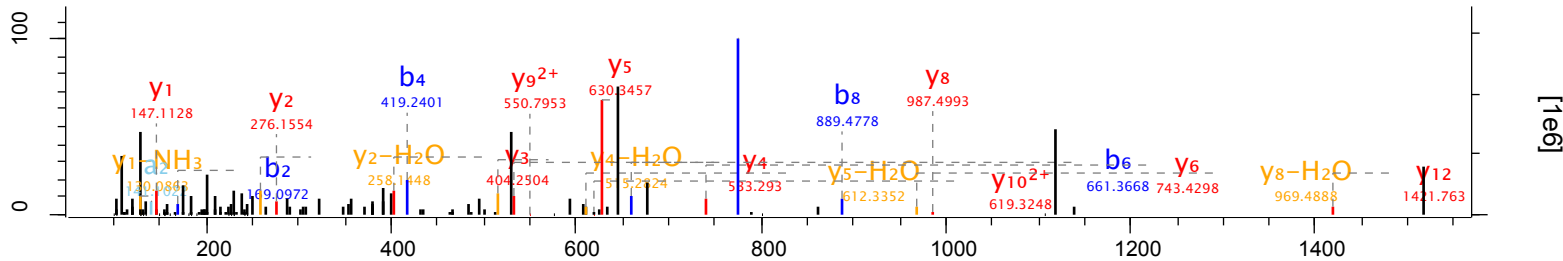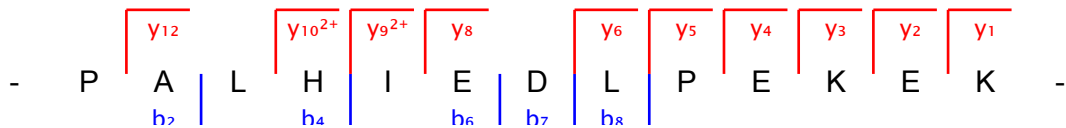

| Raw file                                      | Scan  | Method    | Score | m/z | Gene names |
|-----------------------------------------------|-------|-----------|-------|-----|------------|
| 20120720_EXQ2_AtDe_SA_WTR_OG_pooled_final_3_3 | 50562 | FTMS; HCD | 57.7  | 612 | Slc38a3    |

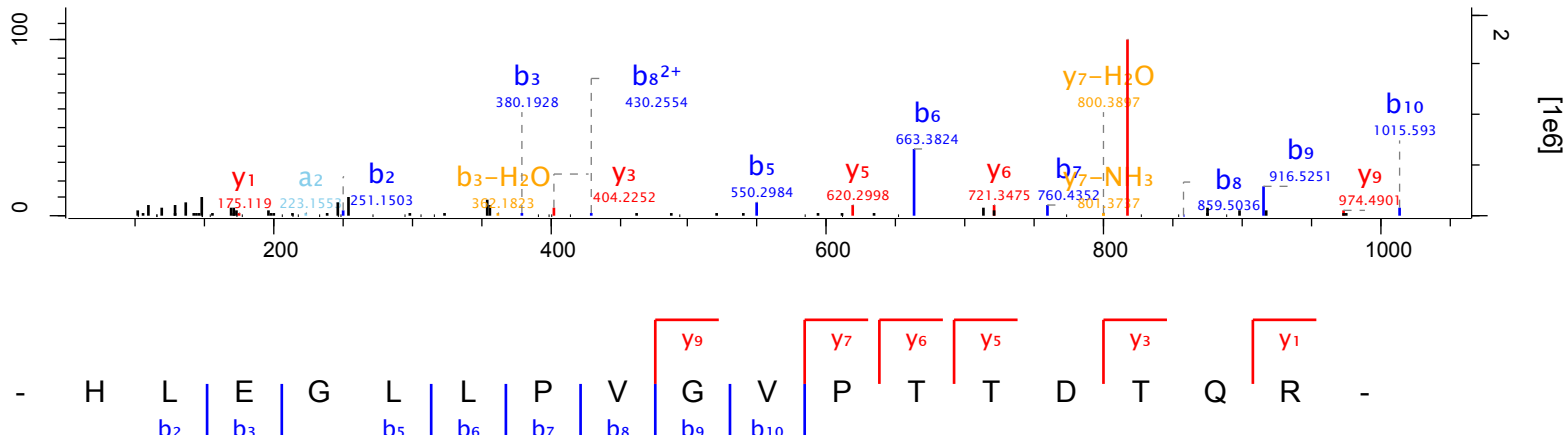



| Raw file                                      | Scan  | Method    | Score | m/z    | Gene names |
|-----------------------------------------------|-------|-----------|-------|--------|------------|
| 20120720_EXQ2_AtDe_SA_WTR_OG_pooled_final_3_4 | 12726 | FTMS; HCD | 70.82 | 542.77 | Rgs13      |

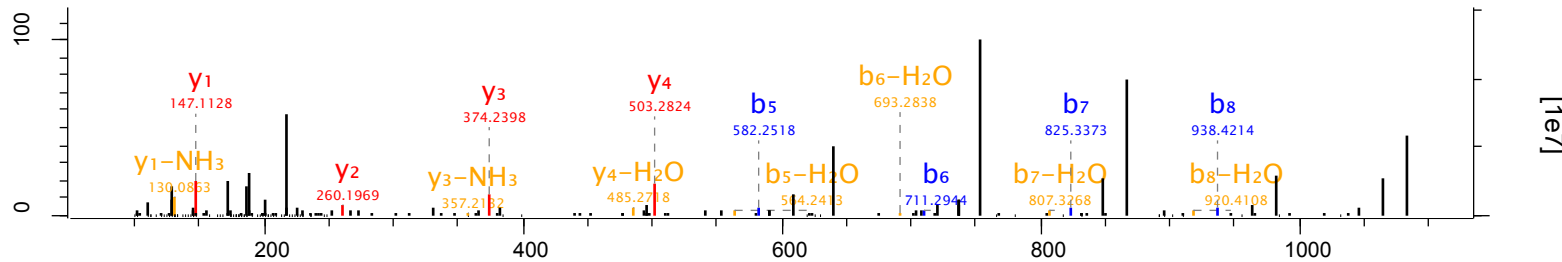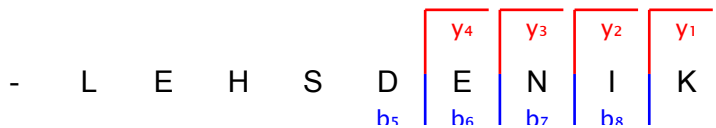

| Raw file                                      | Scan  | Method    | Score | m/z    | Gene names |
|-----------------------------------------------|-------|-----------|-------|--------|------------|
| 20120720_EXQ2_AtDe_SA_WTR_OG_pooled_final_3_4 | 13190 | FTMS; HCD | 71.43 | 542.77 | Rgs13      |

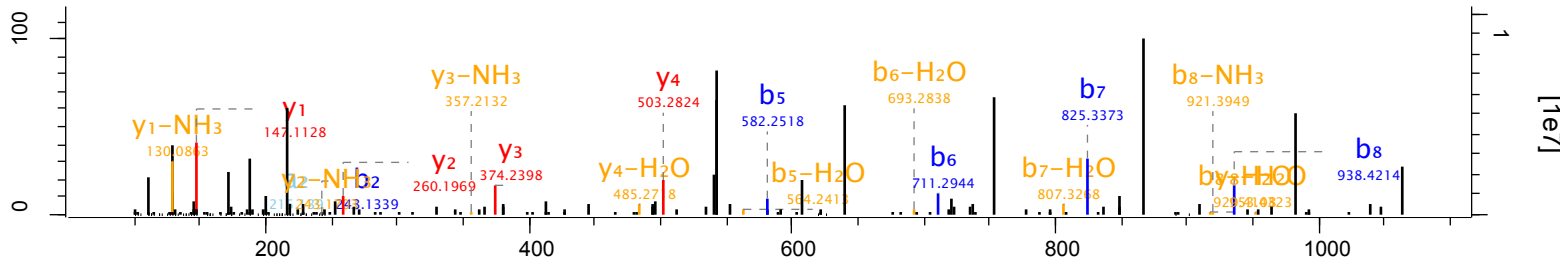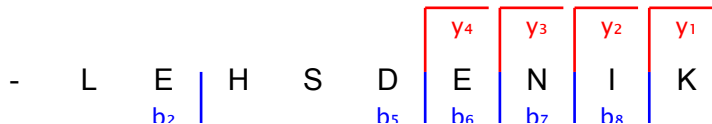

| Raw file                                      | Scan  | Method    | Score  | m/z   | Gene names |
|-----------------------------------------------|-------|-----------|--------|-------|------------|
| 20120720_EXQ2_AtDe_SA_WTR_OG_pooled_final_3_4 | 15425 | FTMS; HCD | 128.36 | 627.3 | Dbnidd2    |

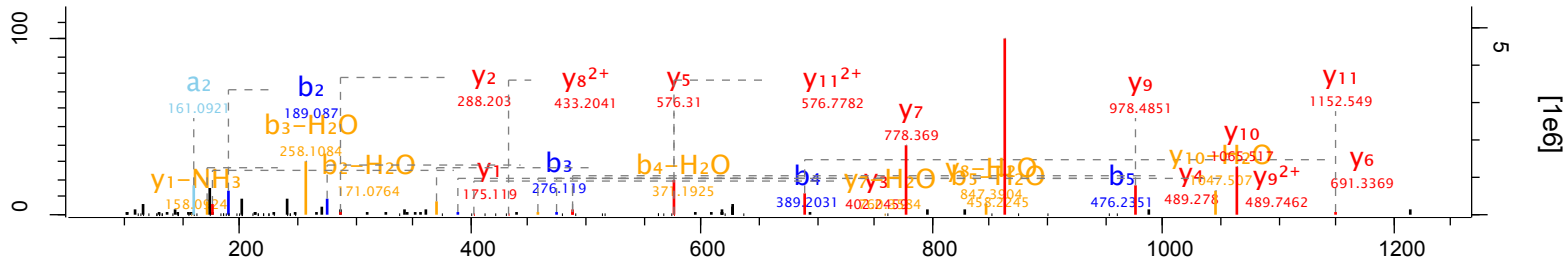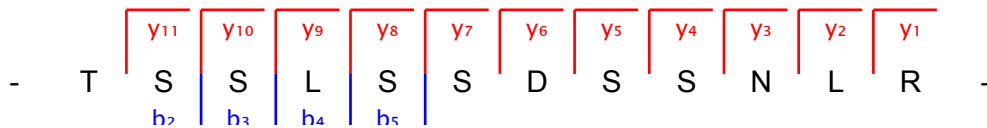

| Raw file                                      | Scan  | Method    | Score | m/z    | Gene names |
|-----------------------------------------------|-------|-----------|-------|--------|------------|
| 20120720_EXQ2_AtDe_SA_WTR_OG_pooled_final_3_4 | 20788 | FTMS; HCD | 77.28 | 460.24 | AI481877   |

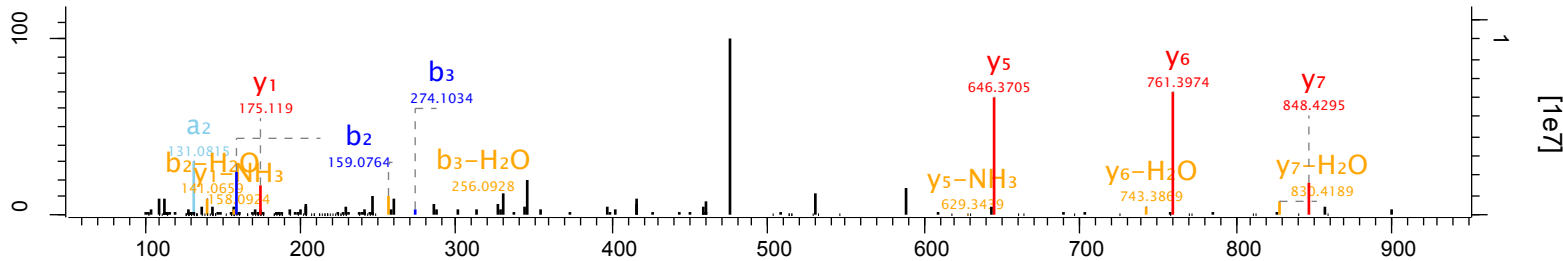

| Raw file                                      | Scan  | Method    | Score  | m/z    | Gene names |
|-----------------------------------------------|-------|-----------|--------|--------|------------|
| 20120720_EXQ2_AtDe_SA_WTR_OG_pooled_final_3_4 | 23564 | FTMS; HCD | 107.08 | 398.56 | Apoa2      |

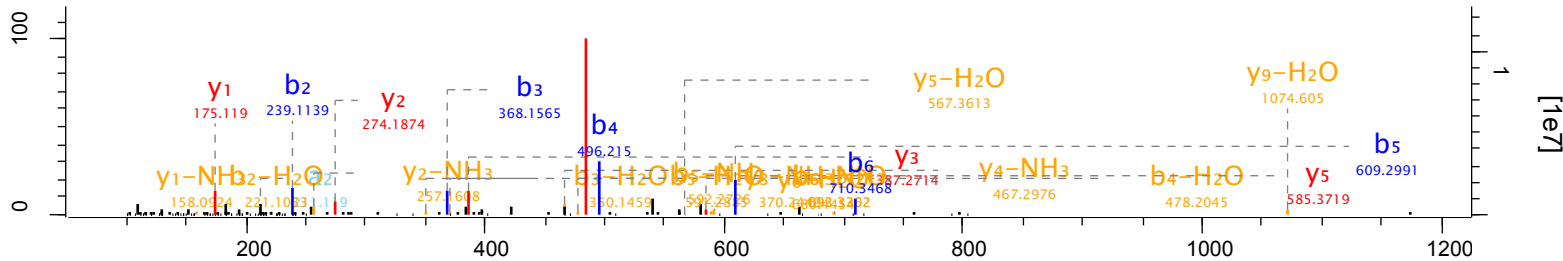

| Raw file                                      | Scan  | Method    | Score | m/z    | Gene names |
|-----------------------------------------------|-------|-----------|-------|--------|------------|
| 20120720_EXQ2_AtDe_SA_WTR_OG_pooled_final_3_4 | 23571 | FTMS; HCD | 96.63 | 597.34 | Apoa2      |

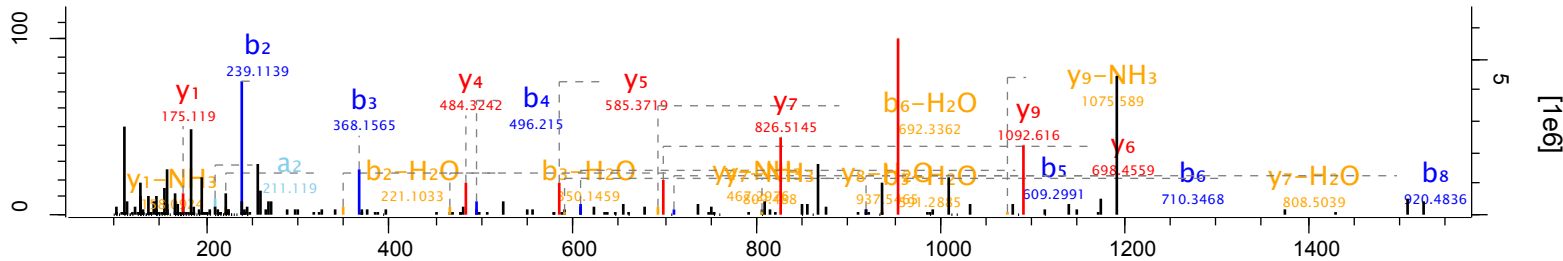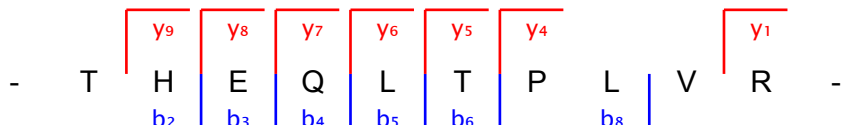

| Raw file                                      | Scan  | Method    | Score | m/z   | Gene names      |
|-----------------------------------------------|-------|-----------|-------|-------|-----------------|
| 20120720_EXQ2_AtDe_SA_WTR_OG_pooled_final_3_4 | 27852 | FTMS; HCD | 45    | 921.4 | Krtap3-1;Krtap3 |

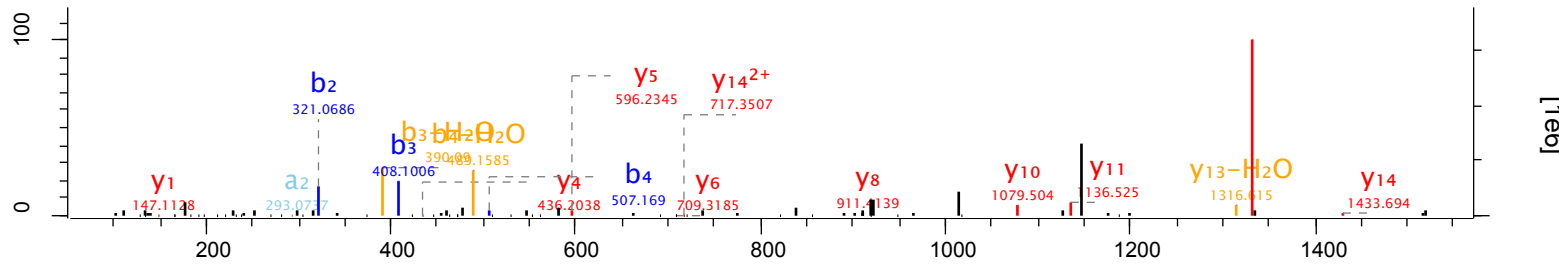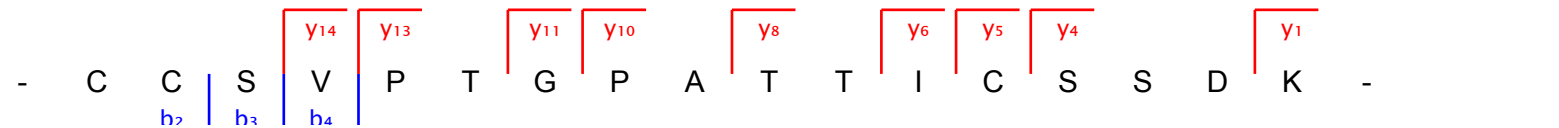

| Raw file                                      | Scan  | Method    | Score | m/z    | Gene names |
|-----------------------------------------------|-------|-----------|-------|--------|------------|
| 20120720_EXQ2_AtDe_SA_WTR_OG_pooled_final_3_4 | 29432 | FTMS; HCD | 62.86 | 858.39 | Elovl6     |

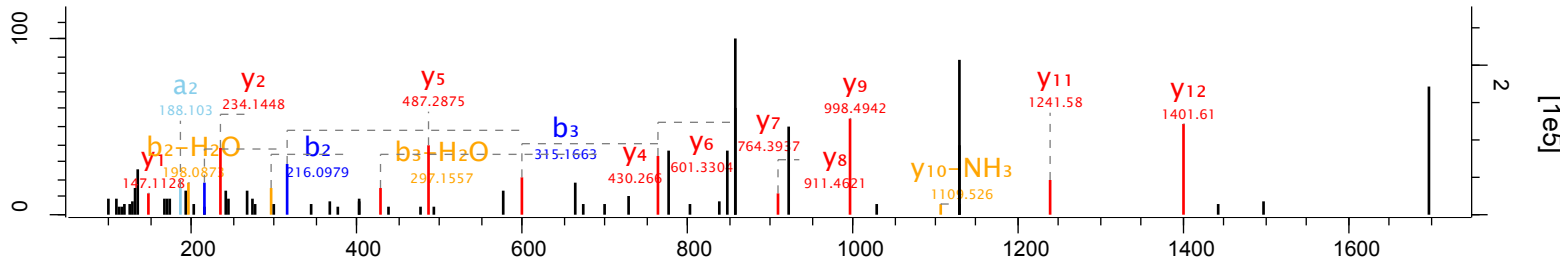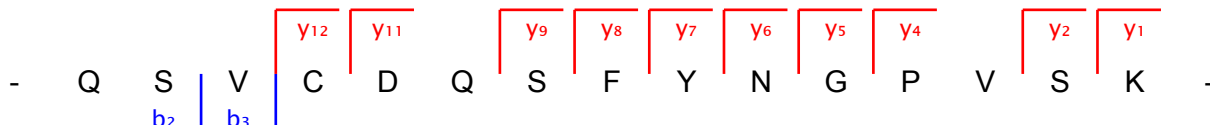



| Raw file                                      | Scan  | Method    | Score | m/z    | Gene names  |
|-----------------------------------------------|-------|-----------|-------|--------|-------------|
| 20120720_EXQ2_AtDe_SA_WTR_OG_pooled_final_3_4 | 34146 | FTMS; HCD | 95.91 | 524.78 | 4933433C111 |

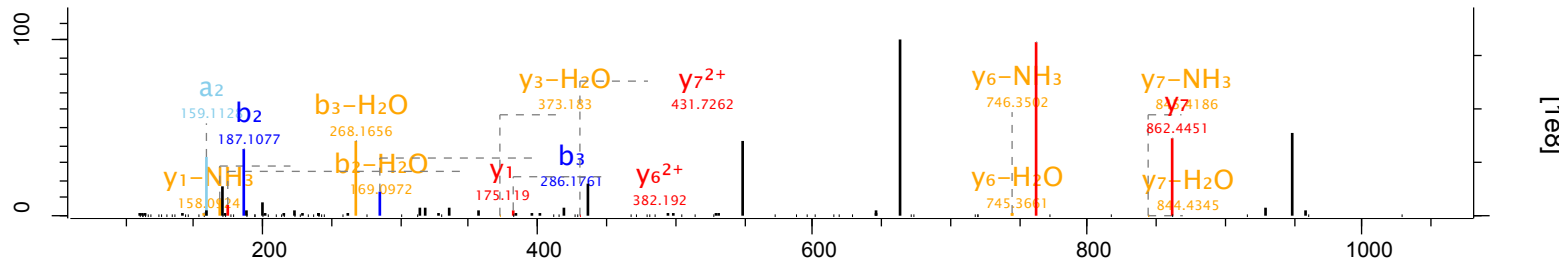

| Raw file                                      | Scan  | Method    | Score | m/z    | Gene names |
|-----------------------------------------------|-------|-----------|-------|--------|------------|
| 20120720_EXQ2_AtDe_SA_WTR_OG_pooled_final_3_4 | 40373 | FTMS; HCD | 82.29 | 590.79 | Tmem151a   |

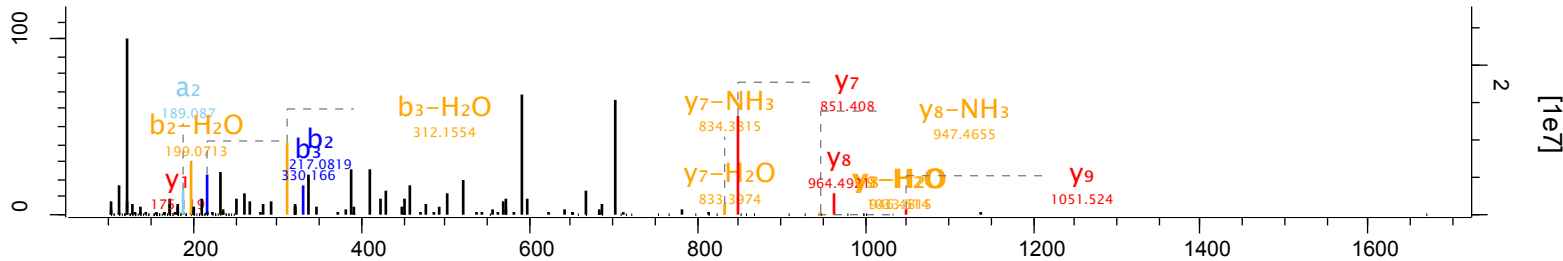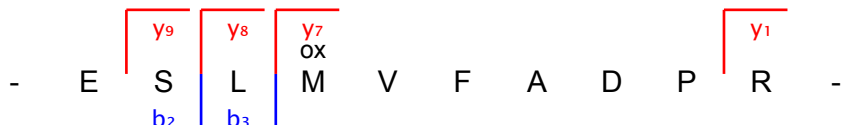

Raw file

20120720\_EXQ2\_AtDe\_SA\_WTR\_OG\_pooled\_final\_3\_4

Scan

53972

Method

FTMS; HCD

Score

53.44

m/z

1021.04

Gene name

Eva1b

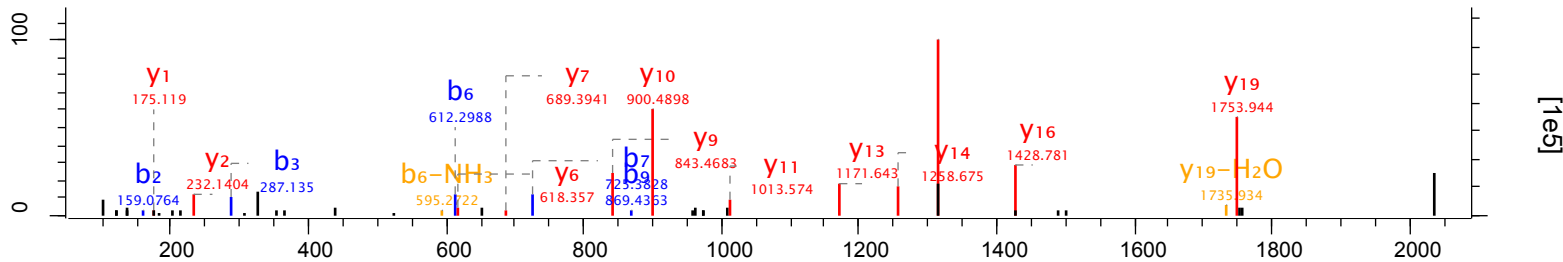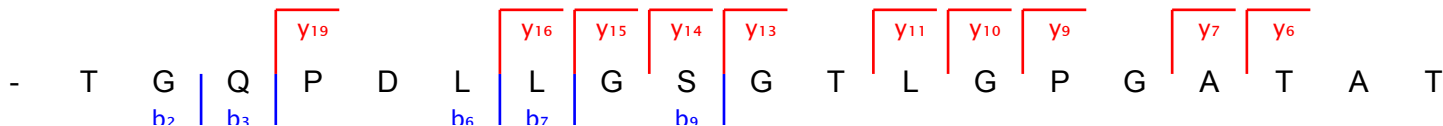

| Raw file                                      | Scan  | Method    | Score | m/z     | Gene name |
|-----------------------------------------------|-------|-----------|-------|---------|-----------|
| 20120720_EXQ2_AtDe_SA_WTR_OG_pooled_final_3_4 | 56709 | FTMS; HCD | 59.37 | 1012.54 | Padi4     |

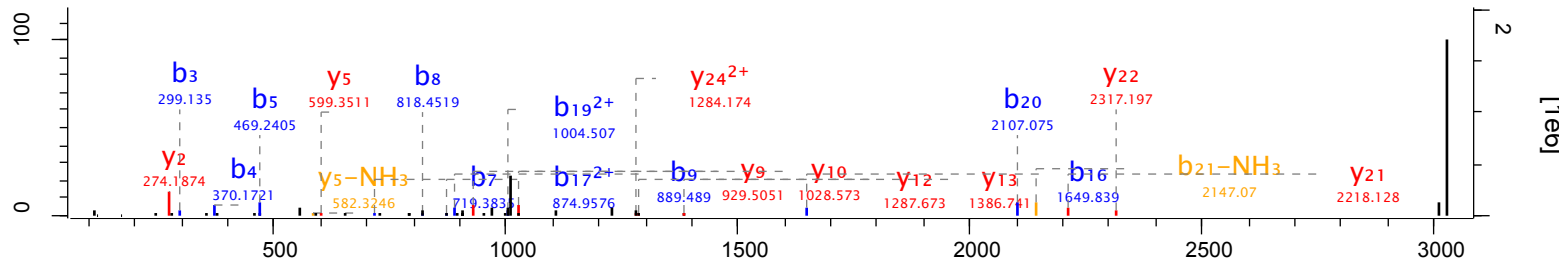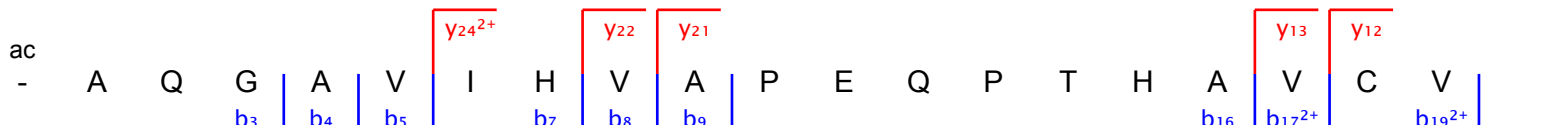

Raw file

Scan

Method

Score

m/z

20120720\_EXQ2\_AtDe\_SA\_WTR\_OG\_pooled\_final\_3\_4

59157

FTMS; HCD

78.69

859.47

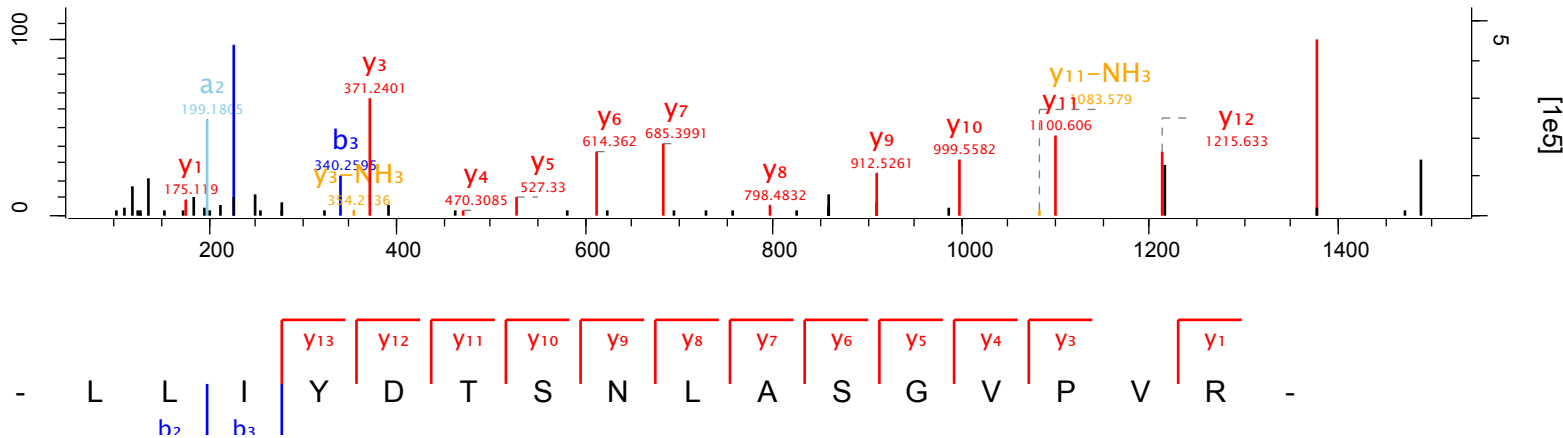

Raw file

20120720\_EXQ2\_AtDe\_SA\_WTR\_OG\_pooled\_final\_3\_4

Scan

60797

Method

FTMS; HCD

Score

110.84

m/z

635.84

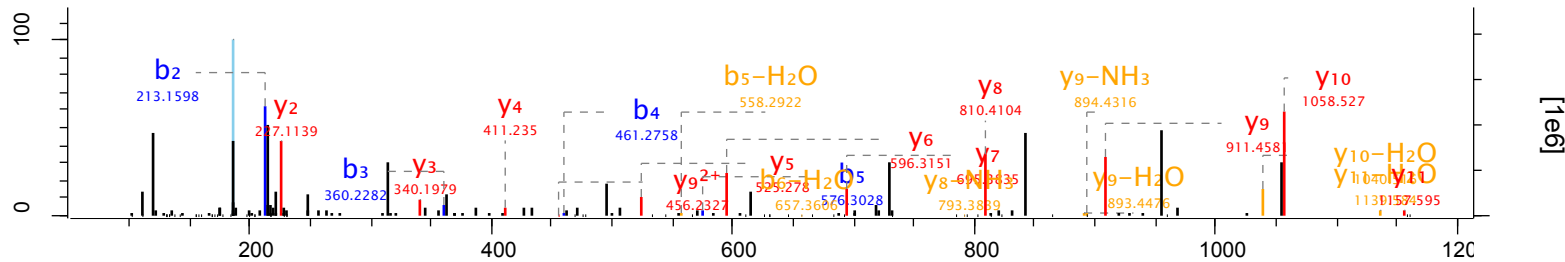

[1e6]

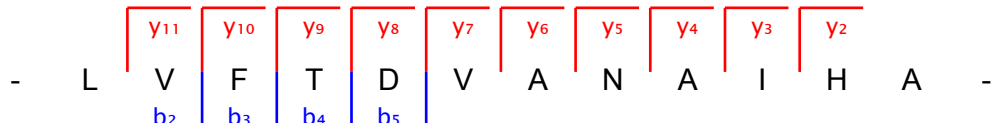

| Raw file                                      | Scan  | Method    | Score | m/z   | Gene names |
|-----------------------------------------------|-------|-----------|-------|-------|------------|
| 20120720_EXQ2_AtDe_SA_WTR_OG_pooled_final_3_4 | 62298 | FTMS; HCD | 48.62 | 754.7 | Cnih4      |

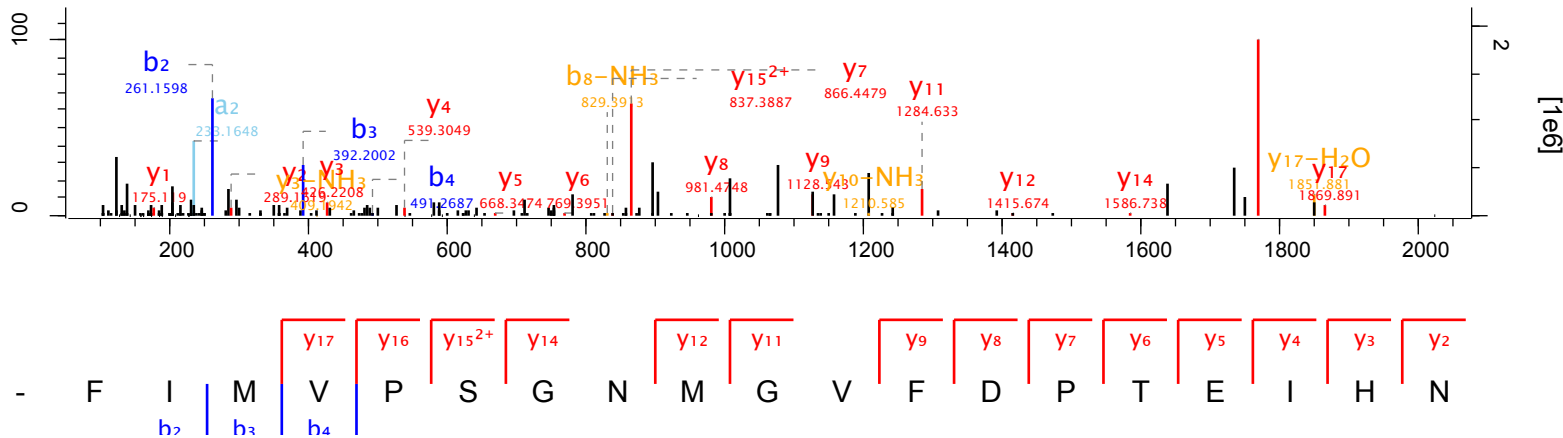

| Raw file                                      | Scan  | Method    | Score | m/z    | Gene names |
|-----------------------------------------------|-------|-----------|-------|--------|------------|
| 20120720_EXQ2_AtDe_SA_WTR_OG_pooled_final_3_4 | 66828 | FTMS; HCD | 55.45 | 733.35 | Serinc2    |

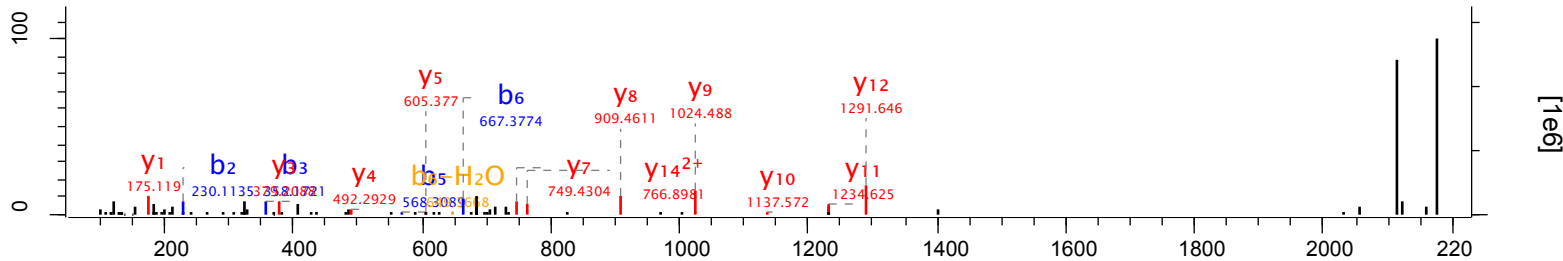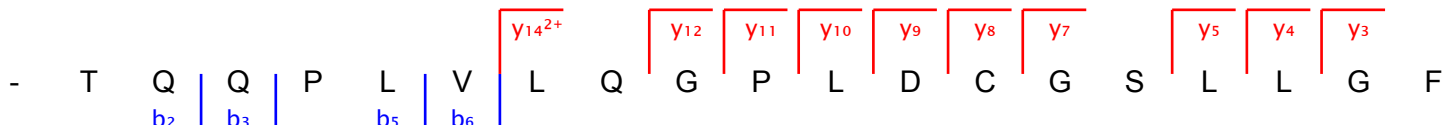



| Raw file                                      | Scan  | Method    | Score | m/z    | Gene names |
|-----------------------------------------------|-------|-----------|-------|--------|------------|
| 20120720_EXQ2_AtDe_SA_WTR_OG_pooled_final_3_4 | 67025 | FTMS; HCD | 89.8  | 715.91 | Uqcr11     |

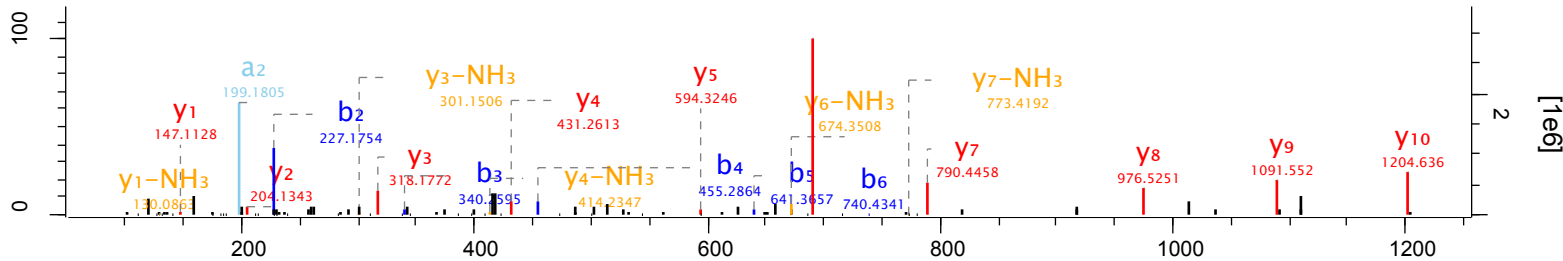

| Raw file                                      | Scan  | Method    | Score | m/z    | Gene names |
|-----------------------------------------------|-------|-----------|-------|--------|------------|
| 20120720_EXQ2_AtDe_SA_WTR_OG_pooled_final_3_5 | 20291 | FTMS; HCD | 77.28 | 460.24 | AI481877   |

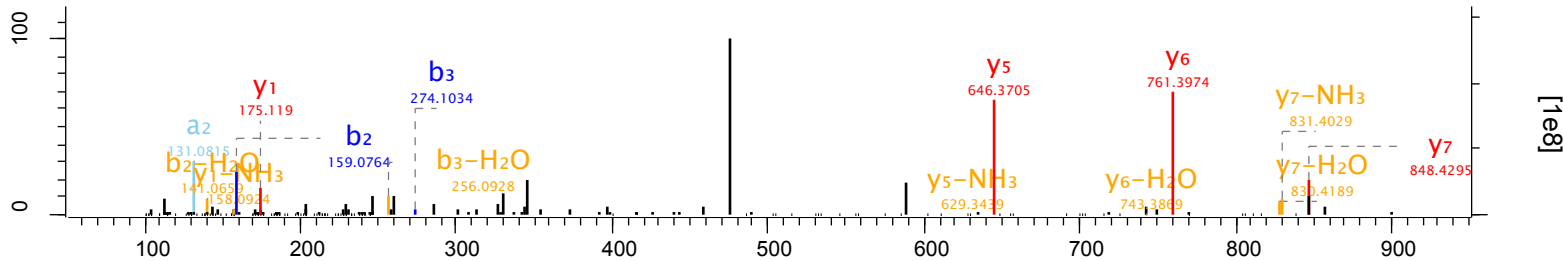

| Raw file                                      | Scan  | Method    | Score  | m/z   | Gene names |
|-----------------------------------------------|-------|-----------|--------|-------|------------|
| 20120720_EXQ2_AtDe_SA_WTR_OG_pooled_final_3_5 | 28794 | FTMS; HCD | 107.06 | 745.9 | Abcc12     |

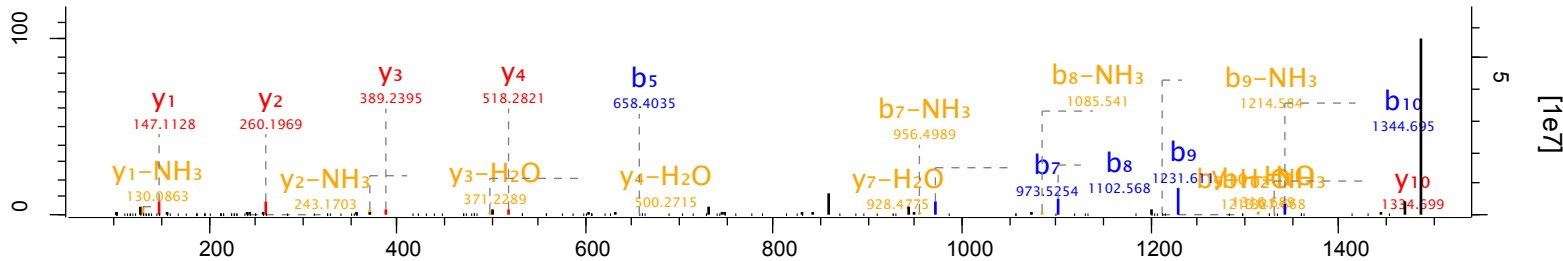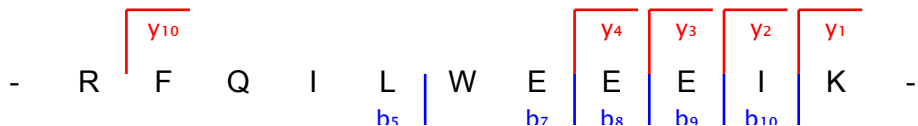

Raw file

Scan

Method

Score

m/z

20120720\_EXQ2\_AtDe\_SA\_WTR\_OG\_pooled\_final\_3\_5

33009

FTMS; HCD

75.54

749.42

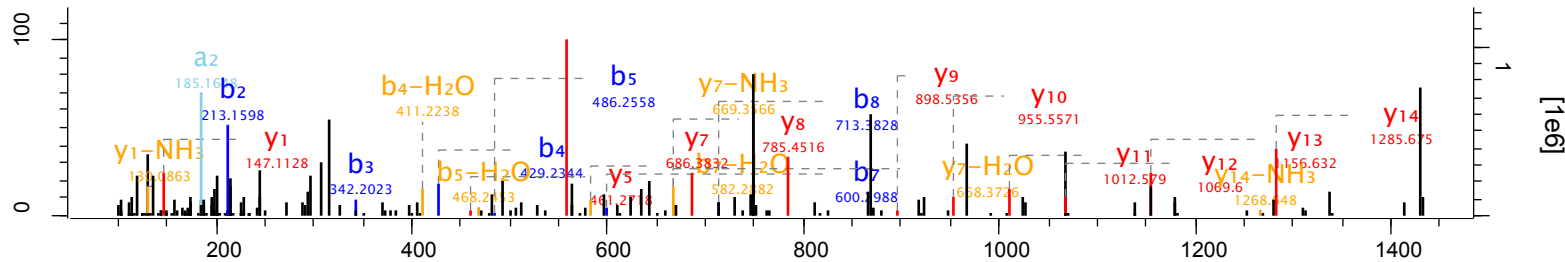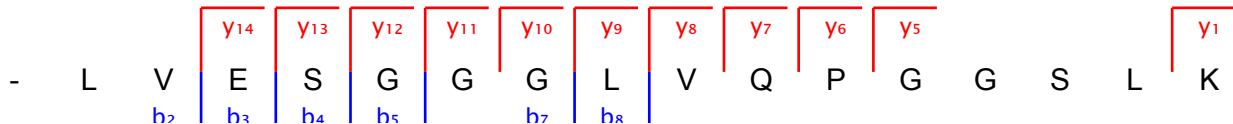

| Raw file                                      | Scan  | Method    | Score  | m/z    | Gene names |
|-----------------------------------------------|-------|-----------|--------|--------|------------|
| 20120720_EXQ2_AtDe_SA_WTR_OG_pooled_final_3_5 | 38340 | FTMS; HCD | 184.31 | 688.35 | 2010107G23 |

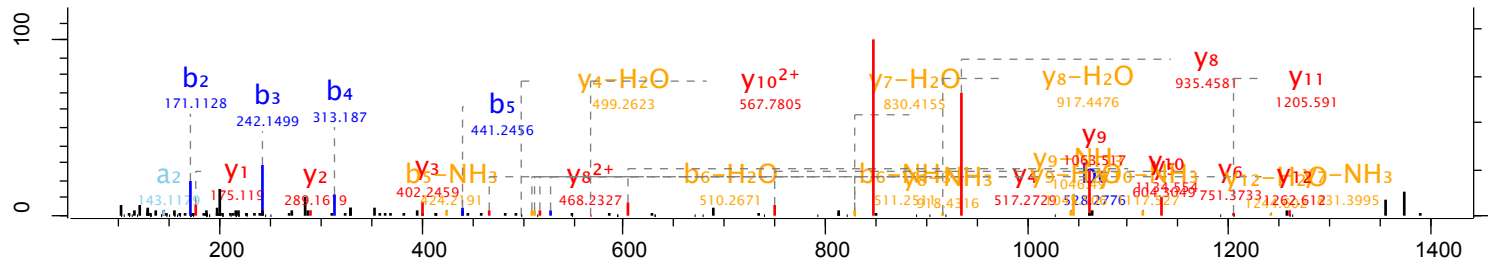

[1e6]

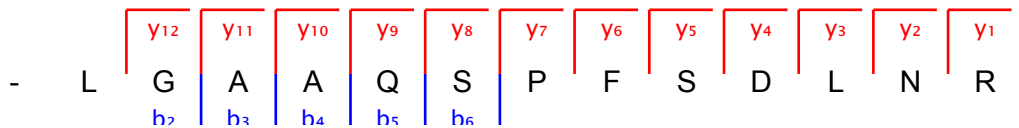

| Raw file                                      | Scan  | Method    | Score | m/z    | Gene names |
|-----------------------------------------------|-------|-----------|-------|--------|------------|
| 20120720_EXQ2_AtDe_SA_WTR_OG_pooled_final_3_5 | 46309 | FTMS; HCD | 83.18 | 619.34 | Tmem69     |

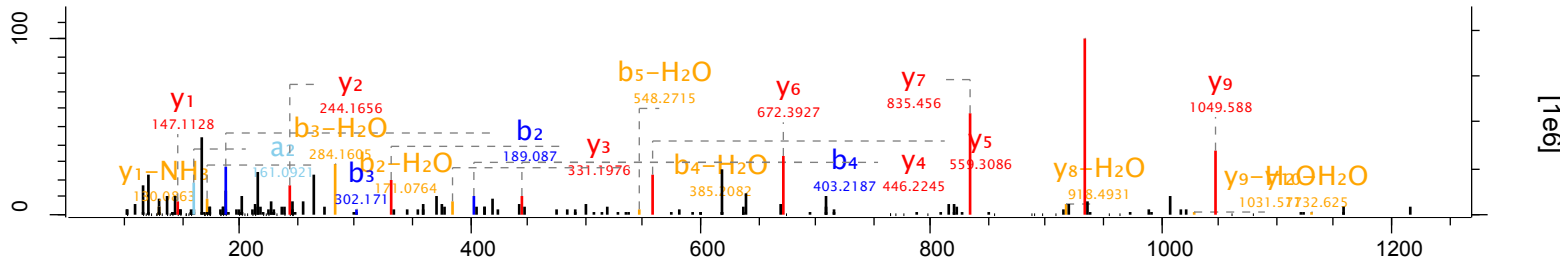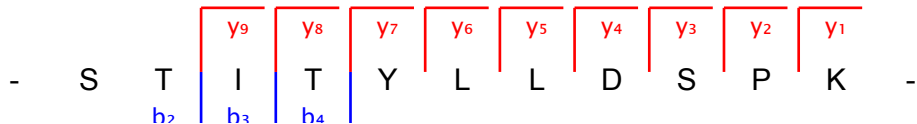

| Raw file                                      | Scan  | Method    | Score | m/z    | Gene names |
|-----------------------------------------------|-------|-----------|-------|--------|------------|
| 20120720_EXQ2_AtDe_SA_WTR_OG_pooled_final_3_5 | 49034 | FTMS; HCD | 86.01 | 623.84 | Pglyrp2    |

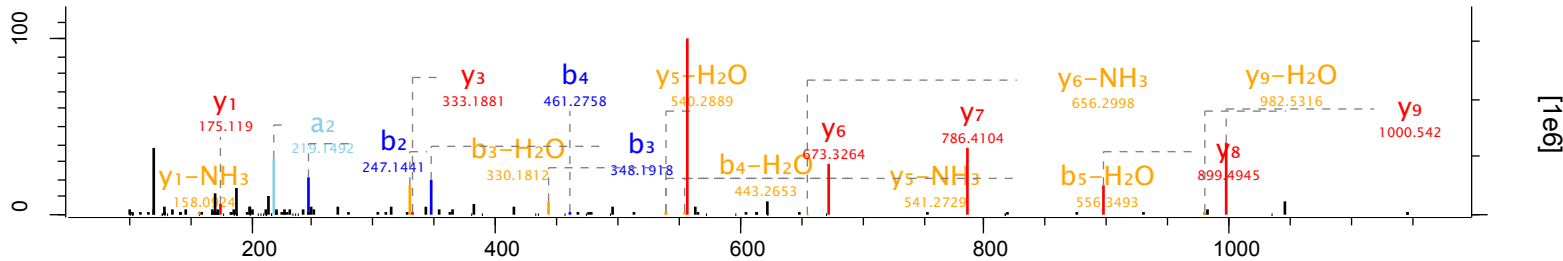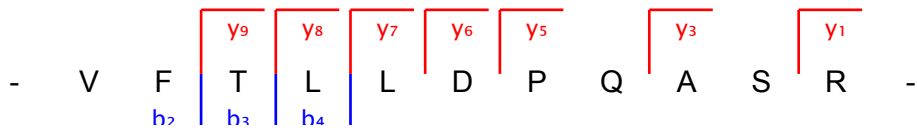

Raw file

20120720\_EXQ2\_AtDe\_SA\_WTR\_OG\_pooled\_final\_3\_5

Scan

49584

Method

FTMS; HCD

Score

106.75

m/z

765.36

Gene names

Cnih4

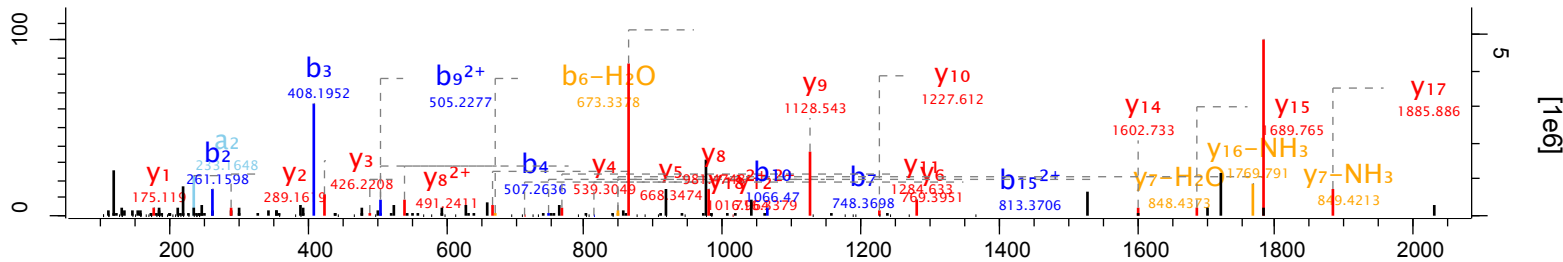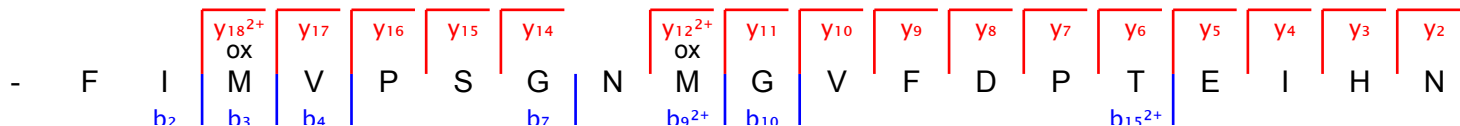



| Raw file                                      | Scan  | Method    | Score | m/z    | Gene names |
|-----------------------------------------------|-------|-----------|-------|--------|------------|
| 20120720_EXQ2_AtDe_SA_WTR_OG_pooled_final_3_5 | 50692 | FTMS; HCD | 88.6  | 708.34 | Ndufa1     |

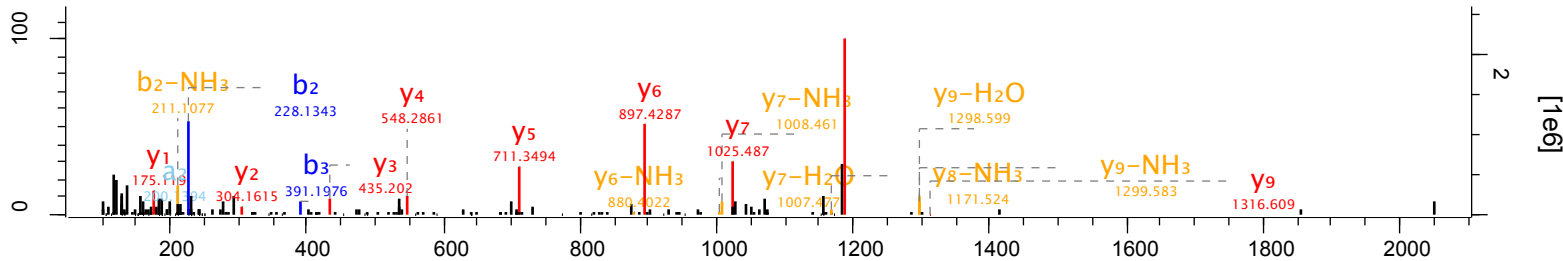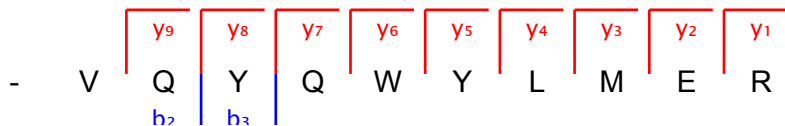

| Raw file                                      | Scan  | Method    | Score | m/z    | Gene names |
|-----------------------------------------------|-------|-----------|-------|--------|------------|
| 20120720_EXQ2_AtDe_SA_WTR_OG_pooled_final_3_5 | 54963 | FTMS; HCD | 83.39 | 760.03 | Cnih4      |

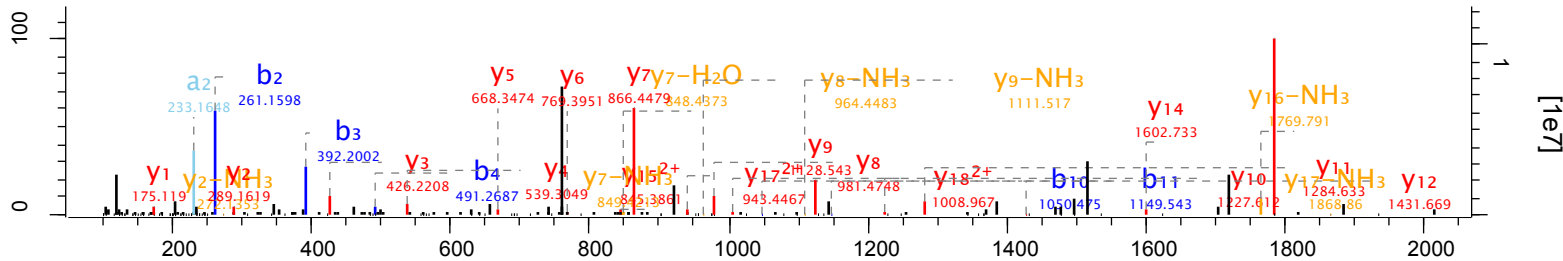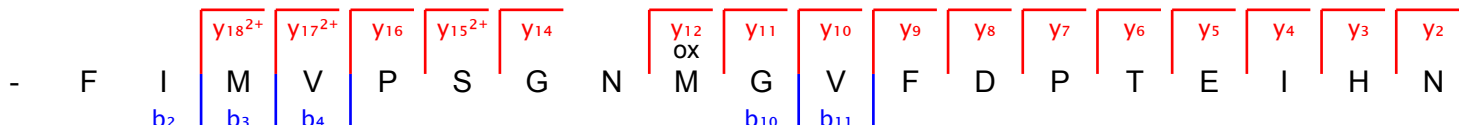

| Raw file                                      | Scan  | Method    | Score | m/z    | Gene names |
|-----------------------------------------------|-------|-----------|-------|--------|------------|
| 20120720_EXQ2_AtDe_SA_WTR_OG_pooled_final_3_5 | 57830 | FTMS; HCD | 82.61 | 760.37 | Cnih4      |

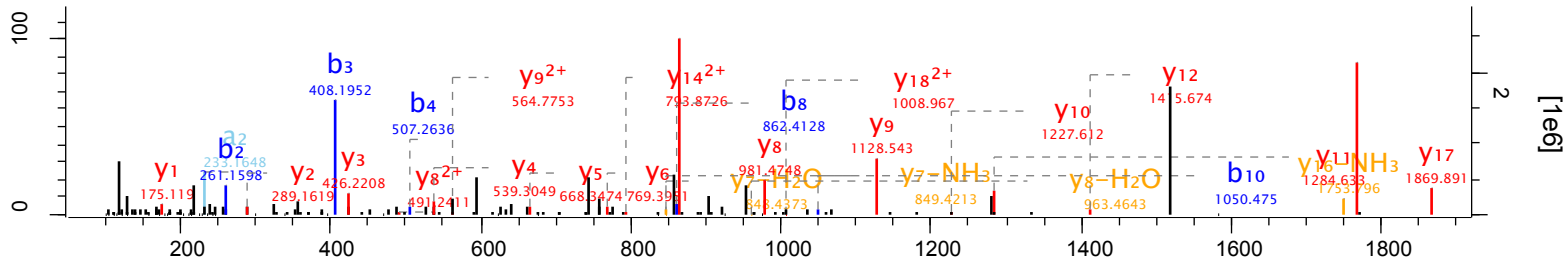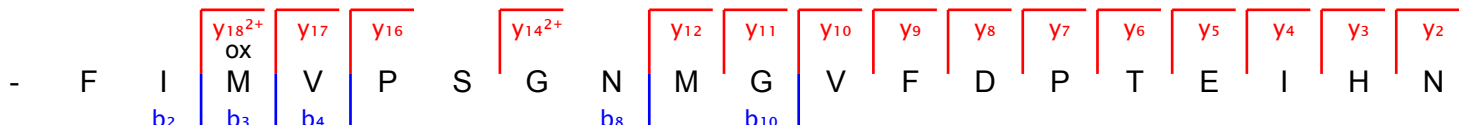

Raw file

Scan

Method

Score

m/z

20120720\_EXQ2\_AtDe\_SA\_WTR\_OG\_pooled\_final\_3\_5

58156

FTMS; HCD

126.77

859.48

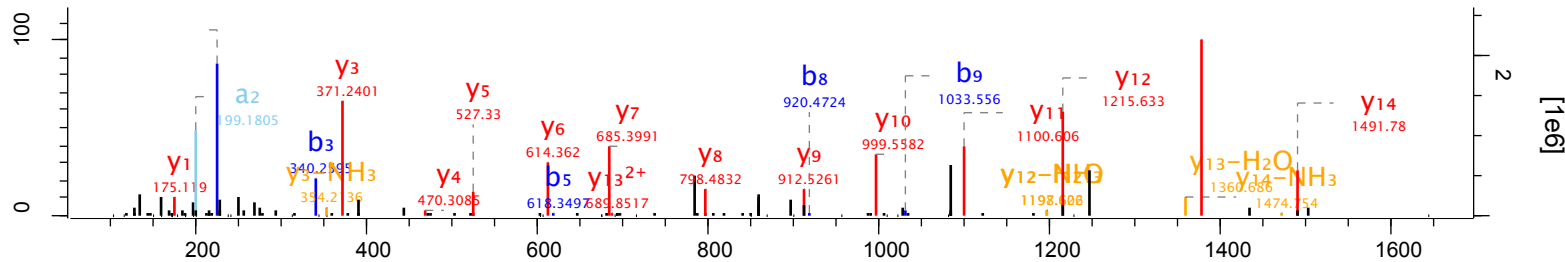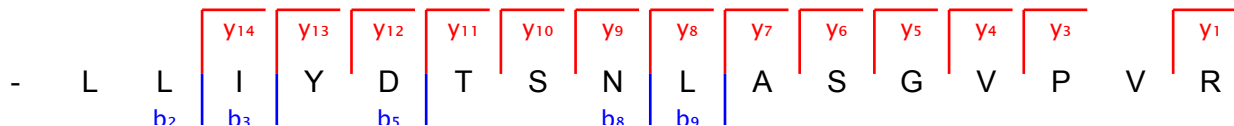

| Raw file                                      | Scan  | Method    | Score  | m/z   | Gene names |
|-----------------------------------------------|-------|-----------|--------|-------|------------|
| 20120720_EXQ2_AtDe_SA_WTR_OG_pooled_final_3_5 | 61464 | FTMS; HCD | 128.05 | 754.7 | Cnih4      |

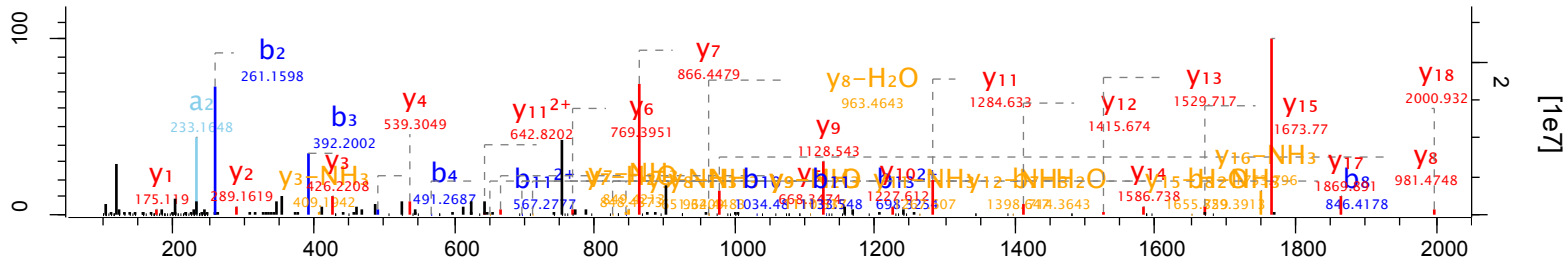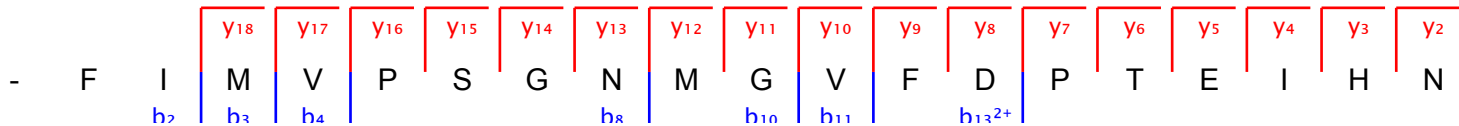

| Raw file                                      | Scan  | Method    | Score | m/z     | Gene name |
|-----------------------------------------------|-------|-----------|-------|---------|-----------|
| 20120720_EXQ2_AtDe_SA_WTR_OG_pooled_final_3_5 | 61479 | FTMS; HCD | 140.2 | 1131.54 | Cnih4     |

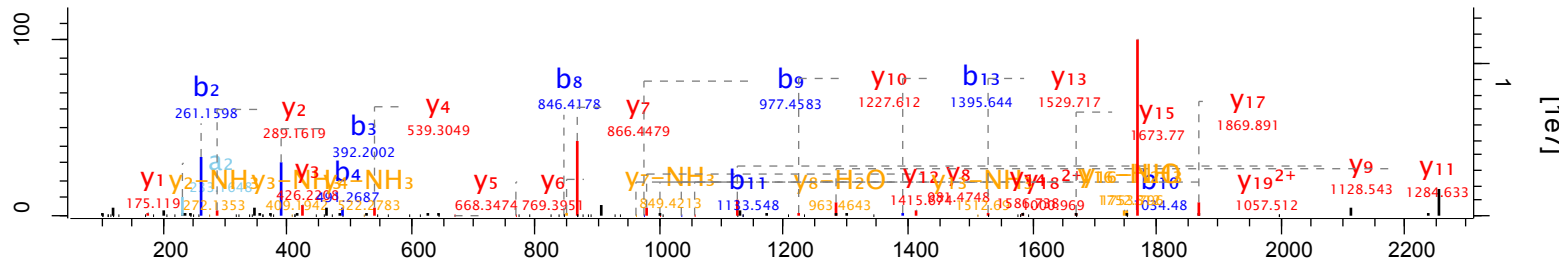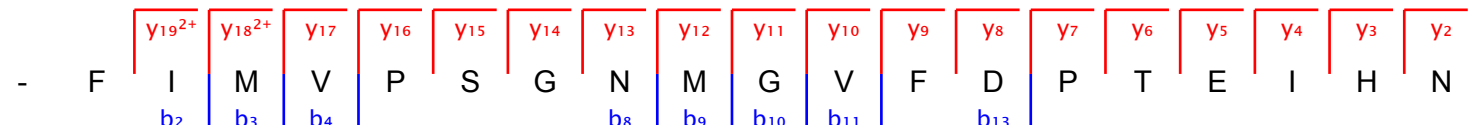

Raw file

Scan

Method

Score

m/z

20120720\_EXQ2\_AtDe\_SA\_WTR\_OG\_pooled\_final\_3\_5

65225

FTMS; HCD

60.83

552.81

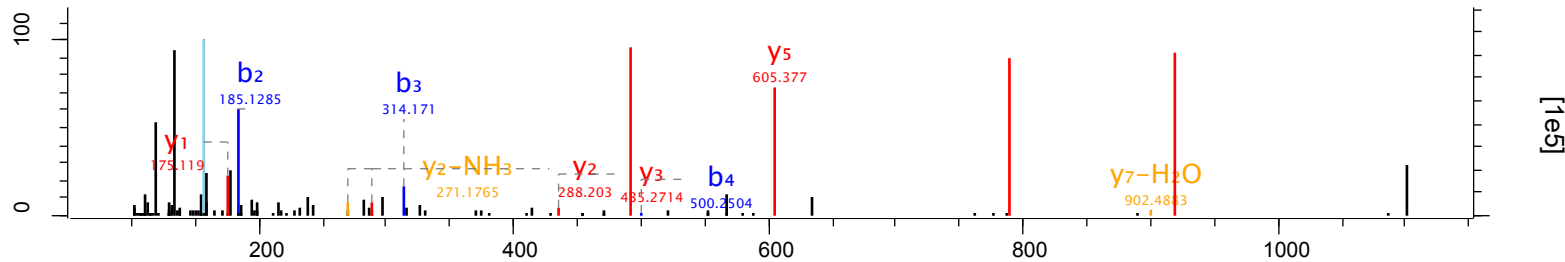

| Raw file                                      | Scan  | Method    | Score | m/z    | Gene names |
|-----------------------------------------------|-------|-----------|-------|--------|------------|
| 20120720_EXQ2_AtDe_SA_WTR_OG_pooled_final_3_6 | 19459 | FTMS; HCD | 69.2  | 460.24 | AI481877   |

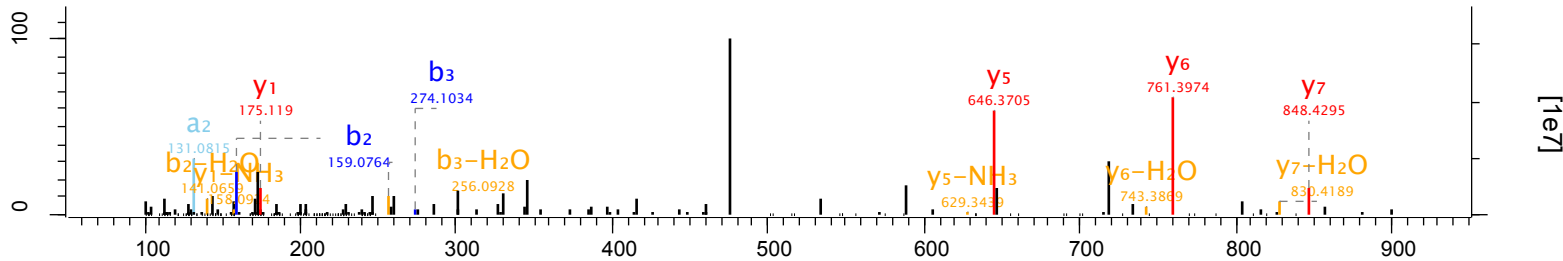



| Raw file                                      | Scan  | Method    | Score | m/z    | Gene names |
|-----------------------------------------------|-------|-----------|-------|--------|------------|
| 20120720_EXQ2_AtDe_SA_WTR_OG_pooled_final_3_6 | 28770 | FTMS; HCD | 99.84 | 705.33 | Vkorc1     |

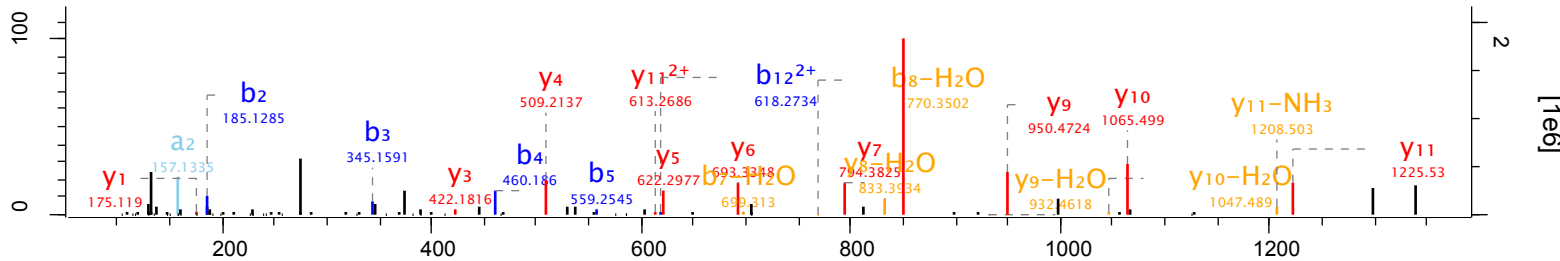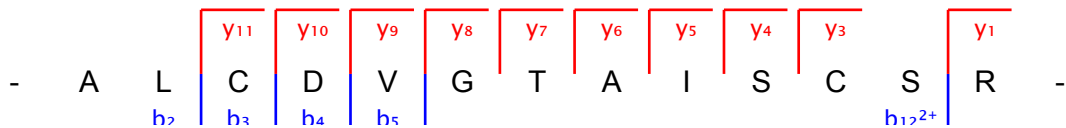

| Raw file                                      | Scan  | Method    | Score | m/z    | Gene names  |
|-----------------------------------------------|-------|-----------|-------|--------|-------------|
| 20120720_EXQ2_AtDe_SA_WTR_OG_pooled_final_3_6 | 32008 | FTMS; HCD | 94.11 | 524.78 | 4933433C111 |

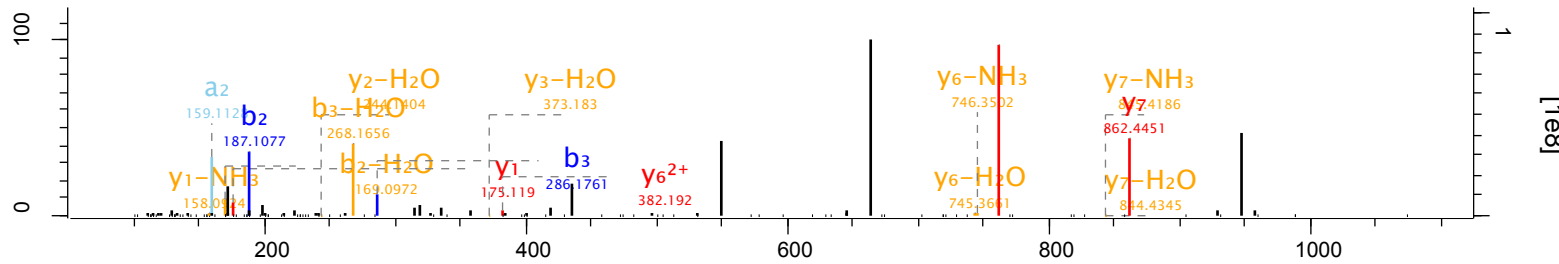

Raw file

Scan

Method

Score

m/z

20120720\_EXQ2\_AtDe\_SA\_WTR\_OG\_pooled\_final\_3\_6

32275

FTMS; HCD

92.77

749.92

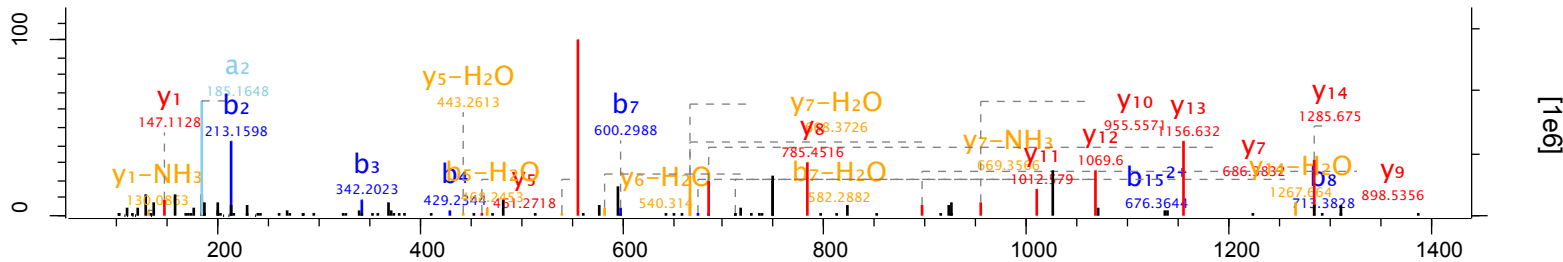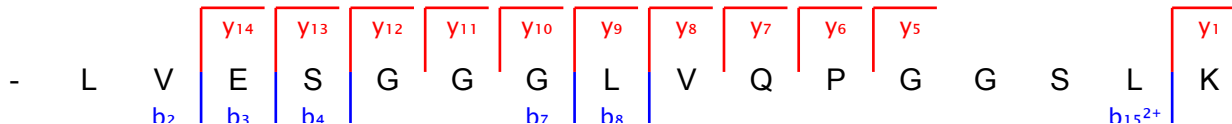

| Raw file                                      | Scan  | Method    | Score | m/z    | Gene names |
|-----------------------------------------------|-------|-----------|-------|--------|------------|
| 20120720_EXQ2_AtDe_SA_WTR_OG_pooled_final_3_6 | 37378 | FTMS; HCD | 116.6 | 688.04 | Tacc2      |

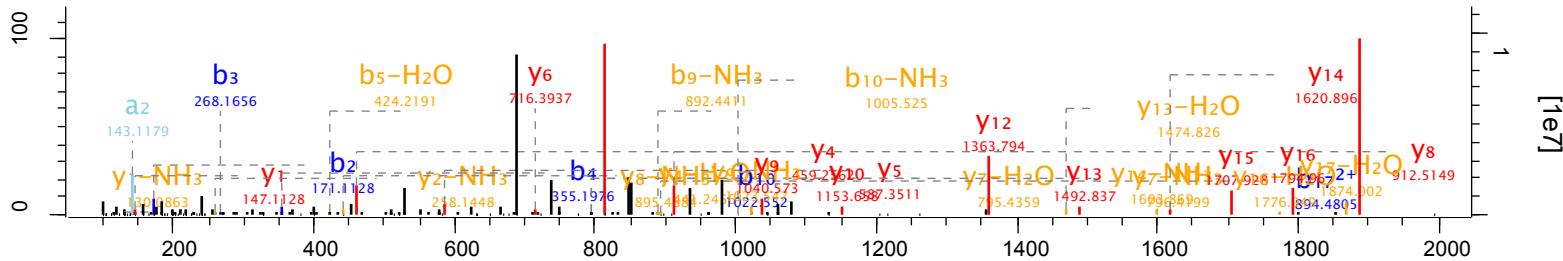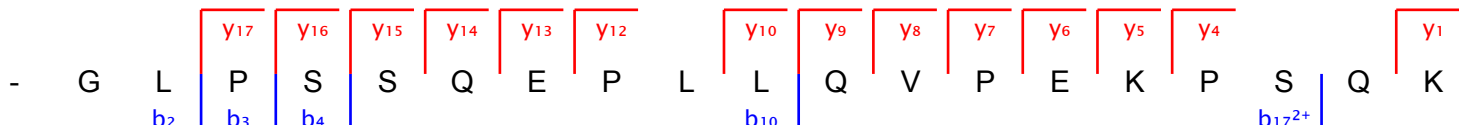

| Raw file                                      | Scan  | Method    | Score  | m/z    | Gene names |
|-----------------------------------------------|-------|-----------|--------|--------|------------|
| 20120720_EXQ2_AtDe_SA_WTR_OG_pooled_final_3_6 | 41572 | FTMS; HCD | 119.27 | 716.34 | Ndufa1     |

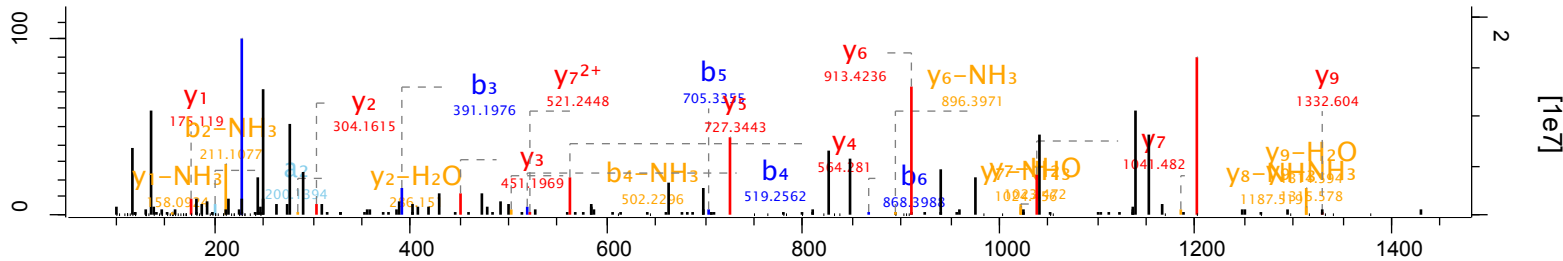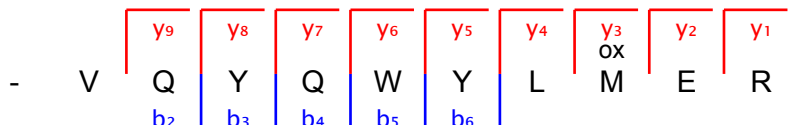

| Raw file                                      | Scan  | Method    | Score | m/z    | Gene names |
|-----------------------------------------------|-------|-----------|-------|--------|------------|
| 20120720_EXQ2_AtDe_SA_WTR_OG_pooled_final_3_6 | 47227 | FTMS; HCD | 94.77 | 564.36 | Pet117     |

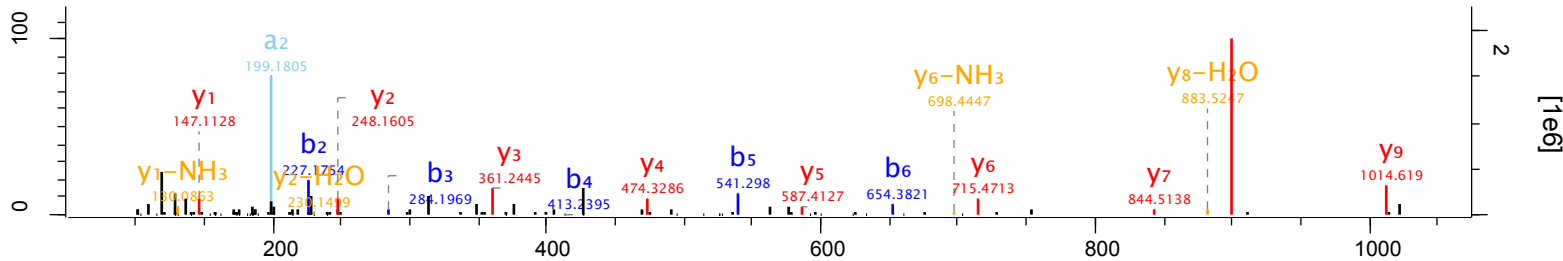

| Raw file                                      | Scan  | Method    | Score | m/z    | Gene names |
|-----------------------------------------------|-------|-----------|-------|--------|------------|
| 20120720_EXQ2_AtDe_SA_WTR_OG_pooled_final_3_6 | 49282 | FTMS; HCD | 80.74 | 853.47 | Rfesd      |

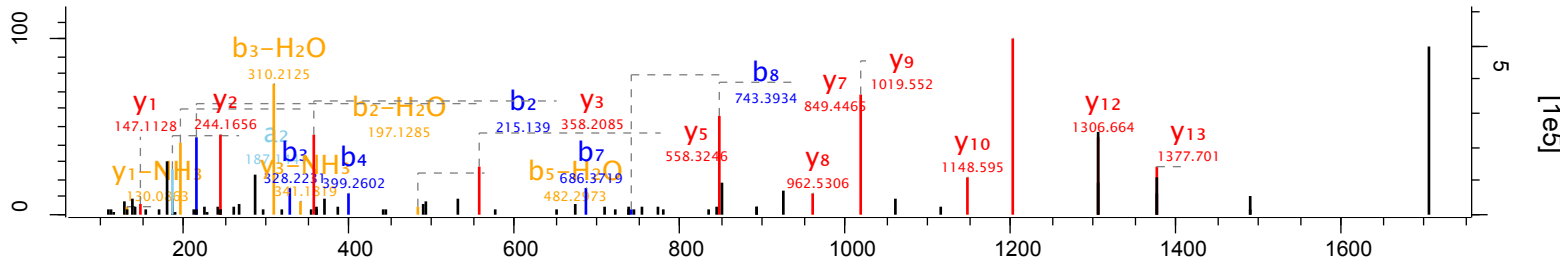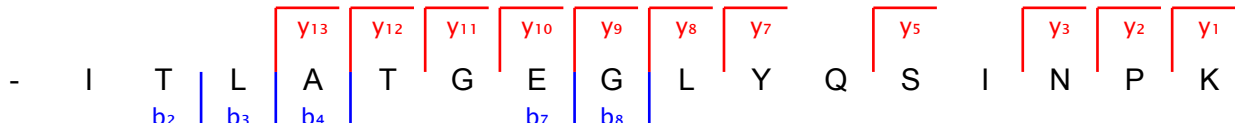

Raw file

Scan

Method

Score

m/z

20120720\_EXQ2\_AtDe\_SA\_WTR\_OG\_pooled\_final\_3\_6

57269

FTMS; HCD

80.39

859.48

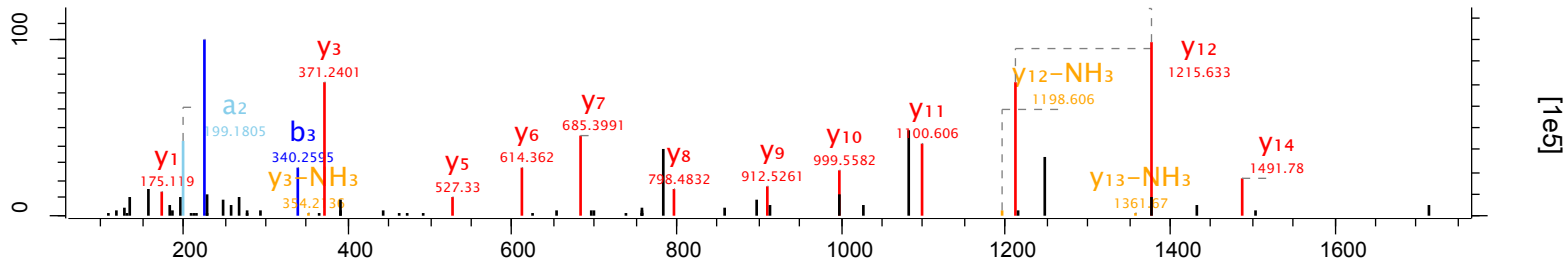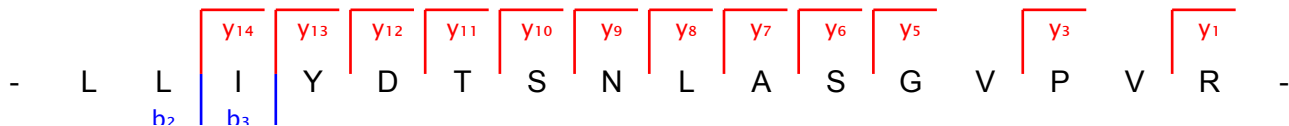



| Raw file                                      | Scan  | Method    | Score | m/z | Gene names |
|-----------------------------------------------|-------|-----------|-------|-----|------------|
| 20120720_EXQ2_AtDe_SA_WTR_OG_pooled_final_3_6 | 59926 | FTMS; HCD | 38.78 | 877 | Lcat       |

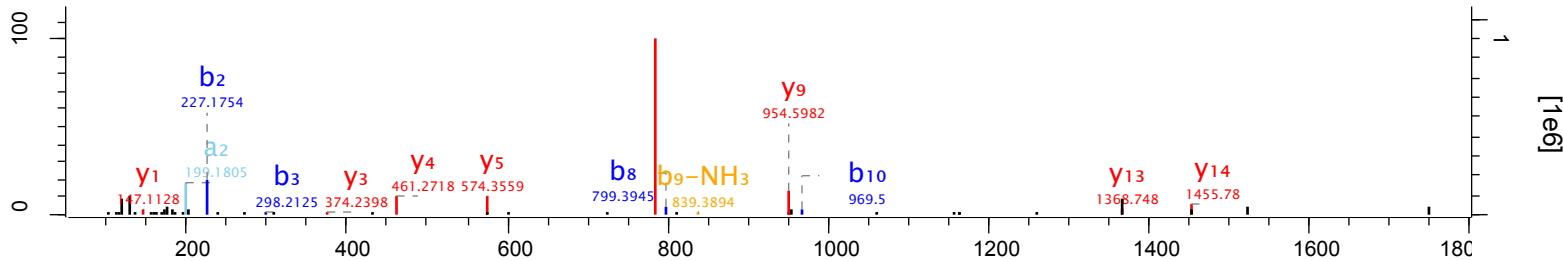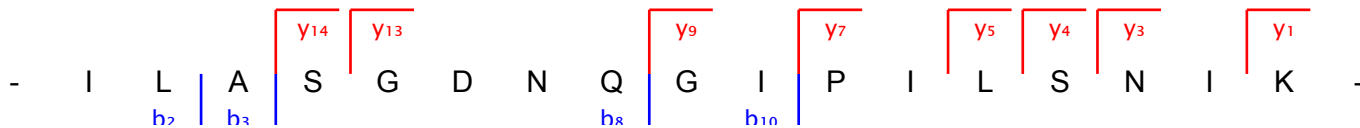

Raw file

20120720\_EXQ2\_AtDe\_SA\_WTR\_OG\_pooled\_final\_3\_6

Scan

64087

Method

FTMS; HCD

Score

130.56

m/z

552.81

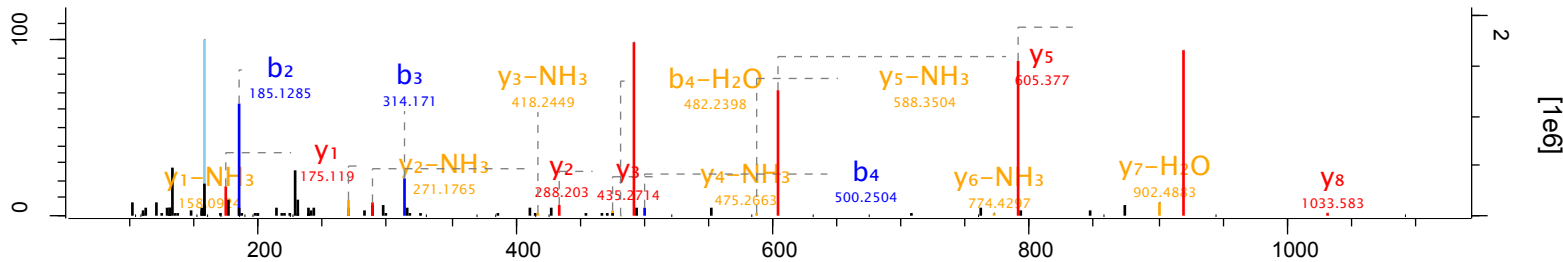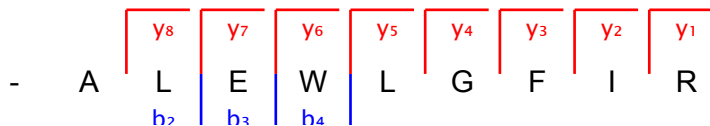

| Raw file                                      | Scan  | Method    | Score | m/z    | Gene names |
|-----------------------------------------------|-------|-----------|-------|--------|------------|
| 20120720_EXQ2_AtDe_SA_WTR_OG_pooled_final_3_6 | 65103 | FTMS; HCD | 67.38 | 715.91 | Uqcr11     |

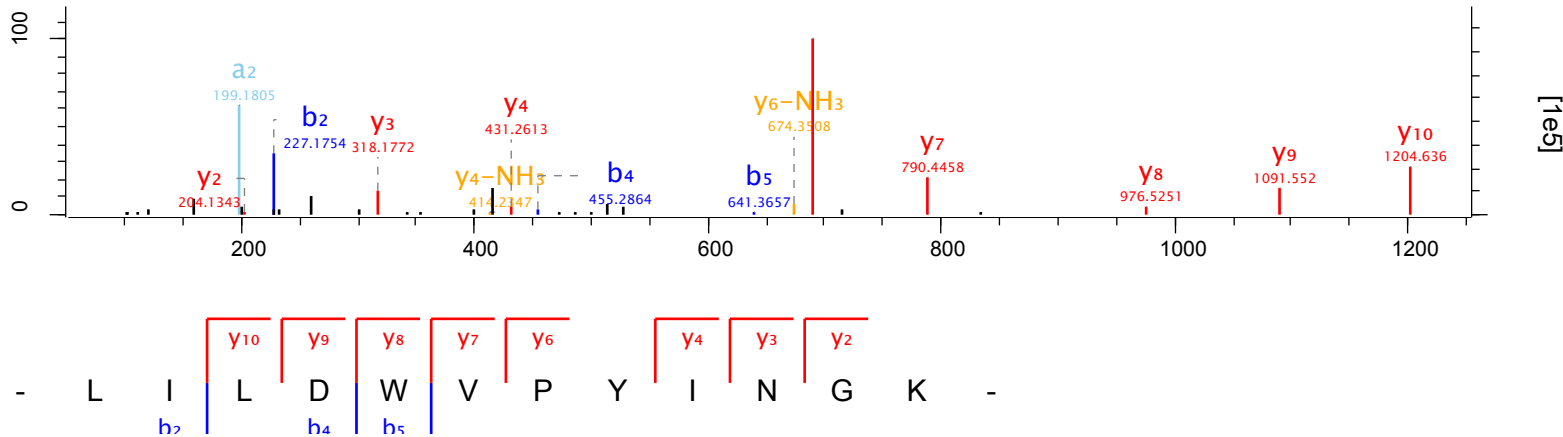

| Raw file                                      | Scan  | Method    | Score | m/z    | Gene names  |
|-----------------------------------------------|-------|-----------|-------|--------|-------------|
| 20120720_EXQ2_AtDe_SA_WTR_OG_pooled_final_3_7 | 10405 | FTMS; HCD | 79.87 | 399.45 | mt-Co3;Mtco |

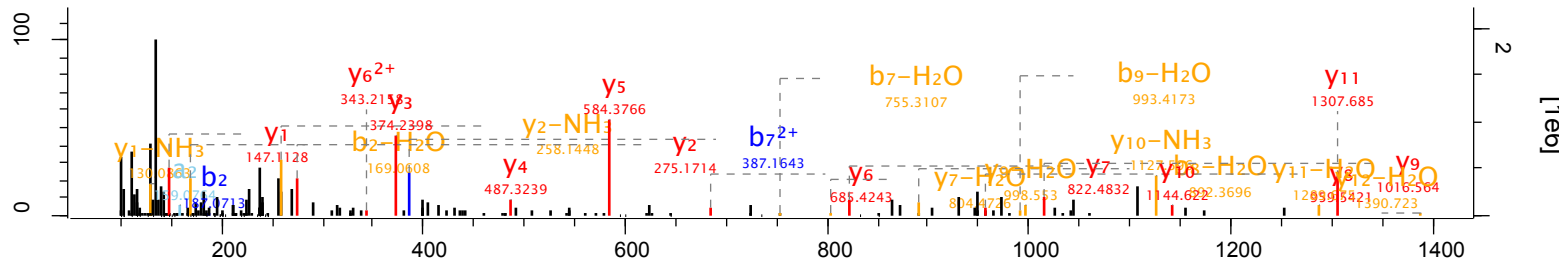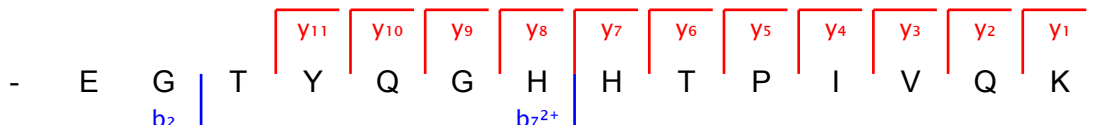

| Raw file                                      | Scan  | Method    | Score  | m/z    | Gene names  |
|-----------------------------------------------|-------|-----------|--------|--------|-------------|
| 20120720_EXQ2_AtDe_SA_WTR_OG_pooled_final_3_7 | 10410 | FTMS; HCD | 124.07 | 532.27 | mt-Co3;Mtco |

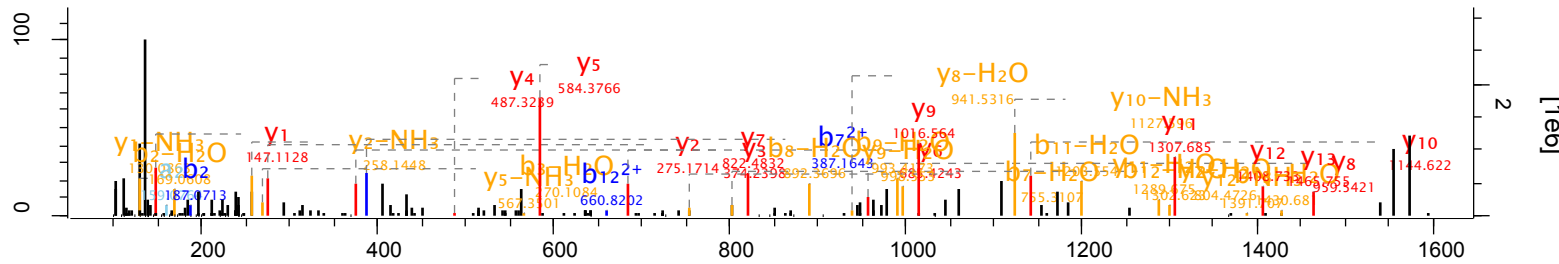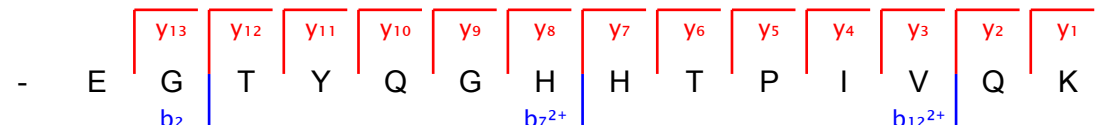

| Raw file                                      | Scan  | Method    | Score | m/z   | Gene names   |
|-----------------------------------------------|-------|-----------|-------|-------|--------------|
| 20120720_EXQ2_AtDe_SA_WTR_OG_pooled_final_3_7 | 10415 | FTMS; HCD | 59.25 | 798.4 | mt-Co3;Mtco3 |

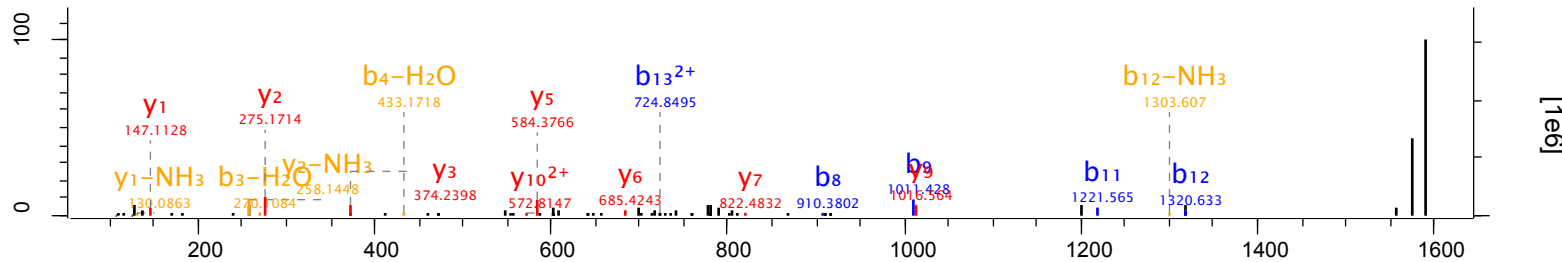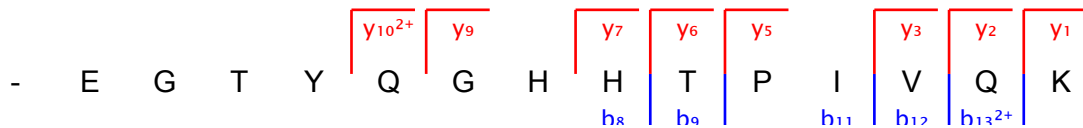

| Raw file                                      | Scan  | Method    | Score  | m/z    | Gene names |
|-----------------------------------------------|-------|-----------|--------|--------|------------|
| 20120720_EXQ2_AtDe_SA_WTR_OG_pooled_final_3_7 | 19269 | FTMS; HCD | 137.95 | 386.88 | Tspan7     |

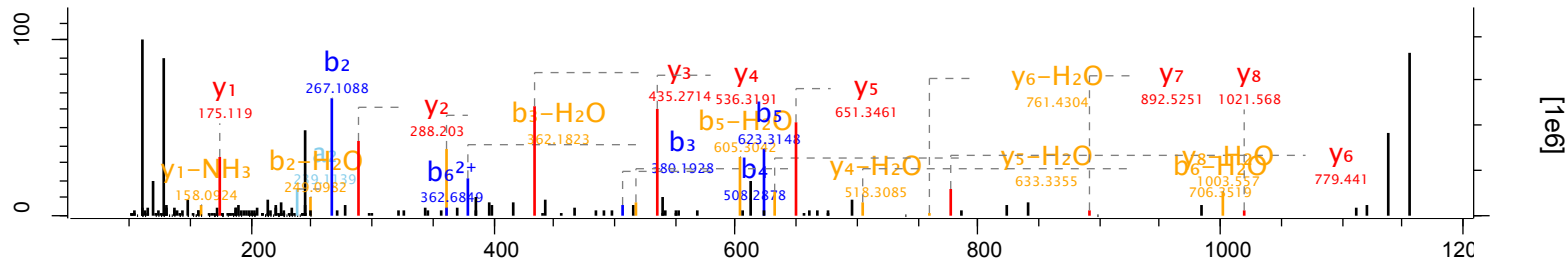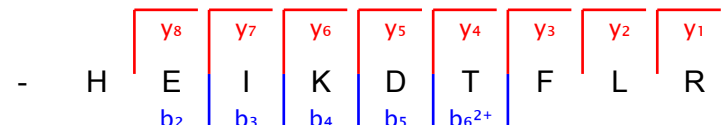

Raw file

Scan

Method

Score

m/z

Gene names

20120720\_EXQ2\_AtDe\_SA\_WTR\_OG\_pooled\_final\_3\_7

22816

FTMS; HCD

131.83

597.34

Apoa2

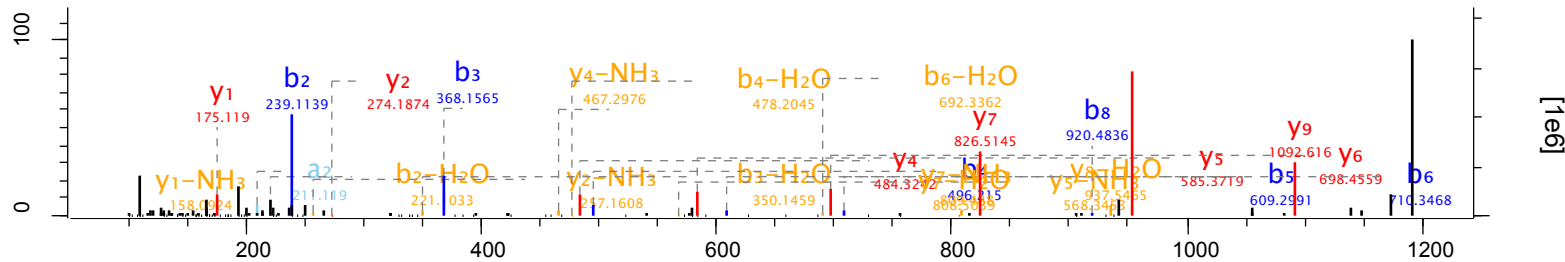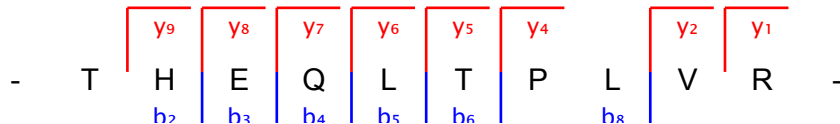



Raw file

20120720\_EXQ2\_AtDe\_SA\_WTR\_OG\_pooled\_final\_3\_7

Scan

29732

Method

FTMS; HCD

Score

119.88

m/z

705.33

Gene names

Vkorc1

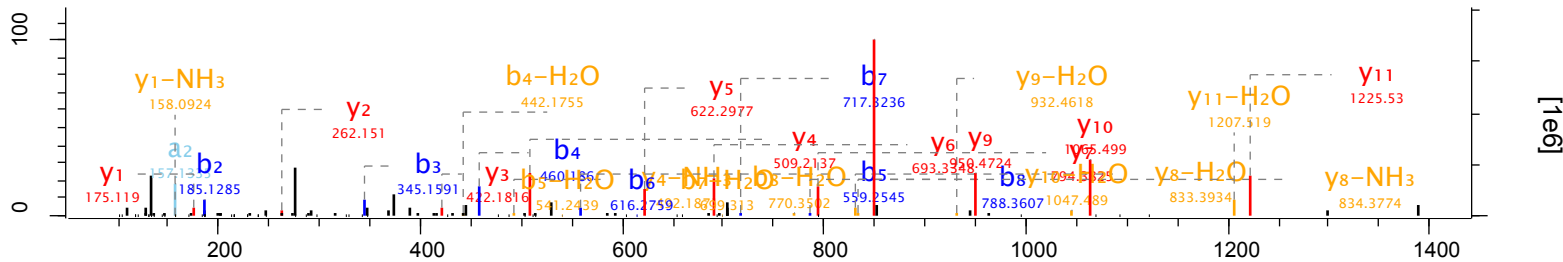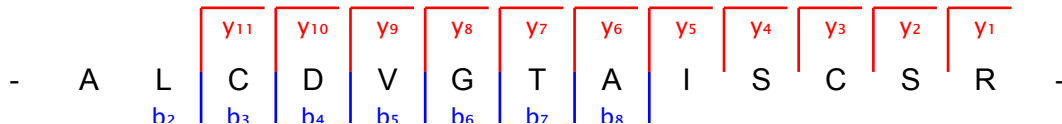

| Raw file                                      | Scan  | Method    | Score | m/z    | Gene names  |
|-----------------------------------------------|-------|-----------|-------|--------|-------------|
| 20120720_EXQ2_AtDe_SA_WTR_OG_pooled_final_3_7 | 32924 | FTMS; HCD | 94.11 | 524.78 | 4933433C111 |

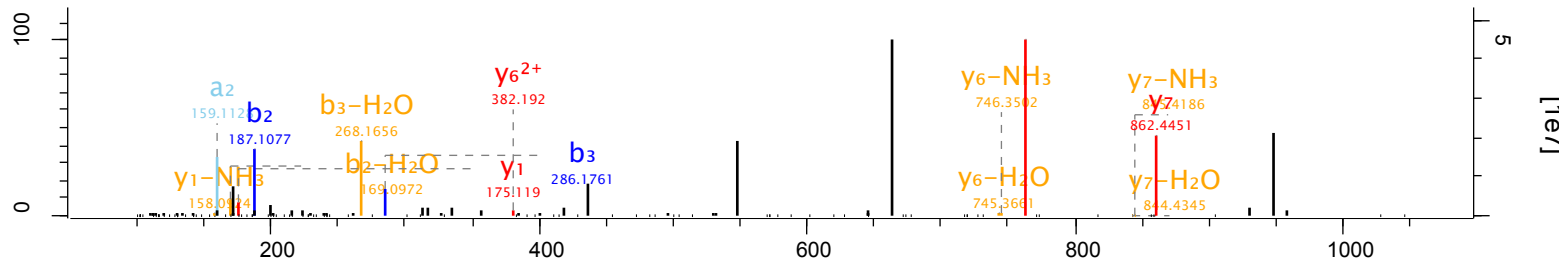

Raw file

Scan

Method

Score

m/z

20120720\_EXQ2\_AtDe\_SA\_WTR\_OG\_pooled\_final\_3\_7

33294

FTMS; HCD

85.47

749.42

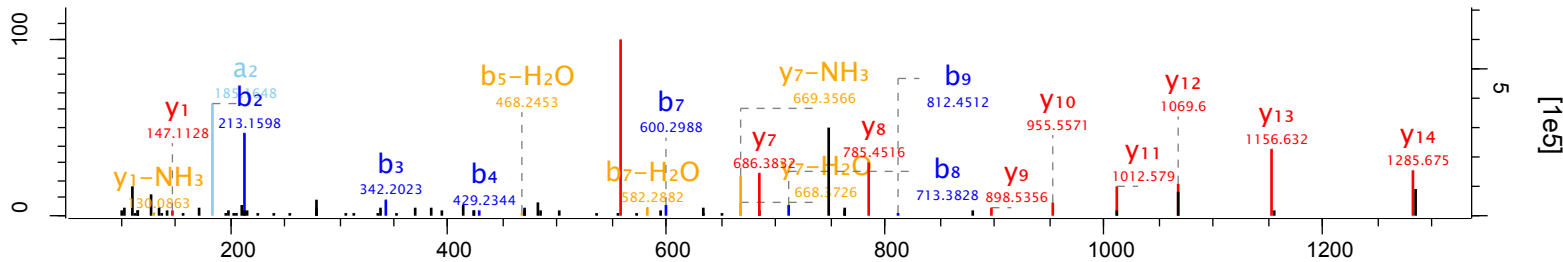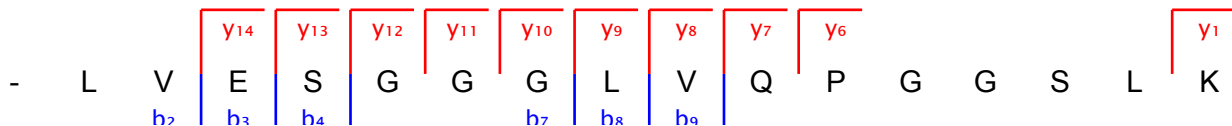

| Raw file                                      | Scan  | Method    | Score | m/z    | Gene names |
|-----------------------------------------------|-------|-----------|-------|--------|------------|
| 20120720_EXQ2_AtDe_SA_WTR_OG_pooled_final_3_7 | 45213 | FTMS; HCD | 49.77 | 593.79 | Msrb1      |

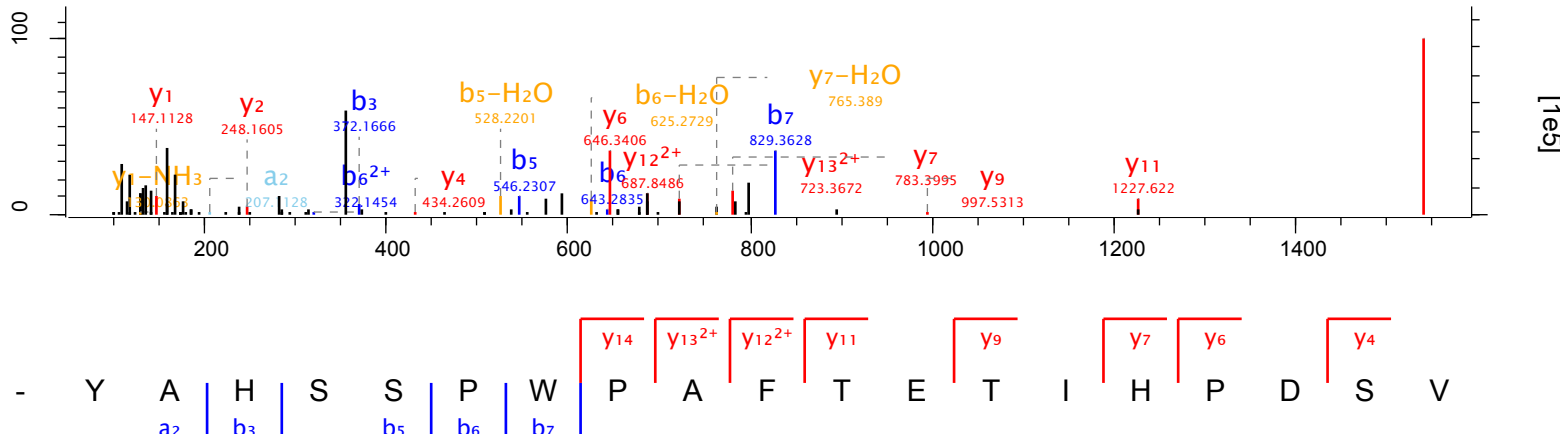

| Raw file                                      | Scan  | Method    | Score | m/z    | Gene names |
|-----------------------------------------------|-------|-----------|-------|--------|------------|
| 20120720_EXQ2_AtDe_SA_WTR_OG_pooled_final_3_7 | 47699 | FTMS; HCD | 86.91 | 469.92 | Themis2    |

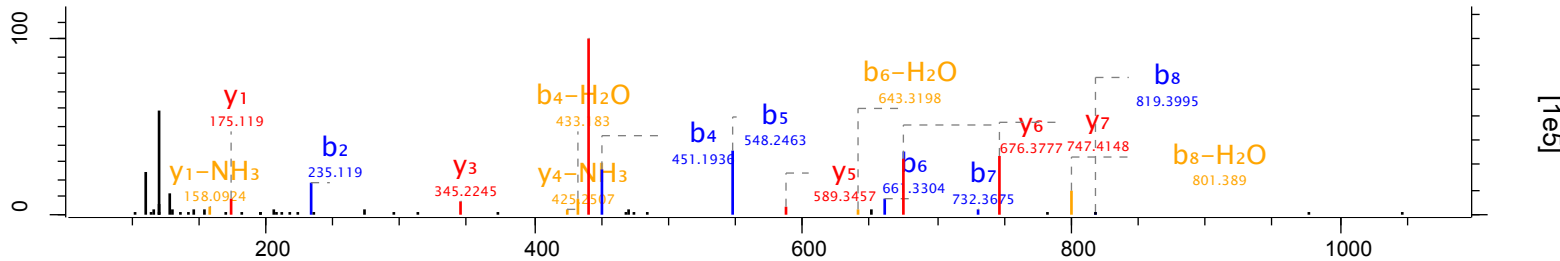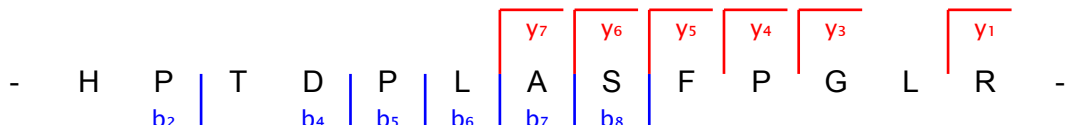

Raw file

20120720\_EXQ2\_AtDe\_SA\_WTR\_OG\_pooled\_final\_3\_8

Scan

14306

Method

FTMS; HCD

Score

79.49

m/z

430.9

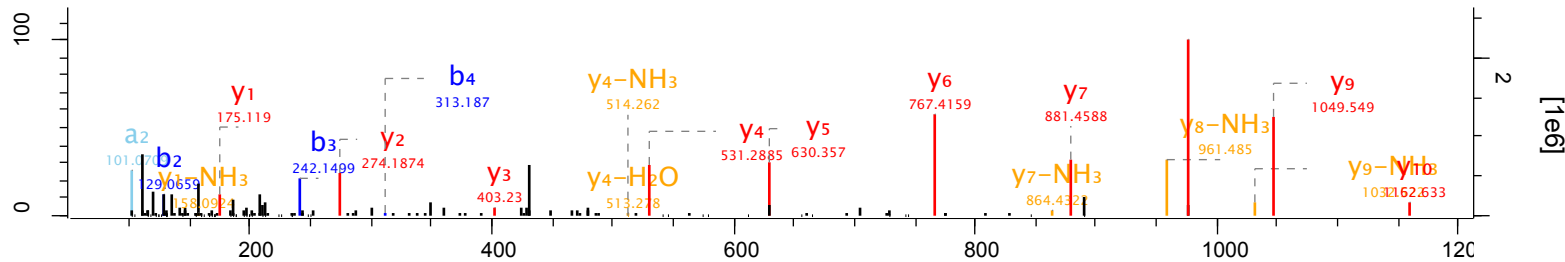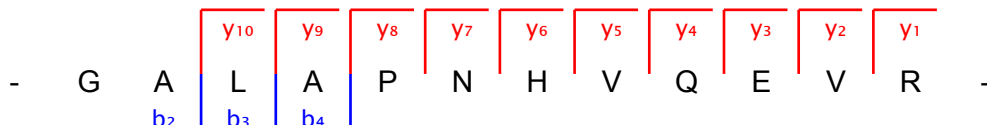

| Raw file                                      | Scan  | Method    | Score | m/z    | Gene names |
|-----------------------------------------------|-------|-----------|-------|--------|------------|
| 20120720_EXQ2_AtDe_SA_WTR_OG_pooled_final_3_8 | 17818 | FTMS; HCD | 113.1 | 550.96 | Gjc3       |

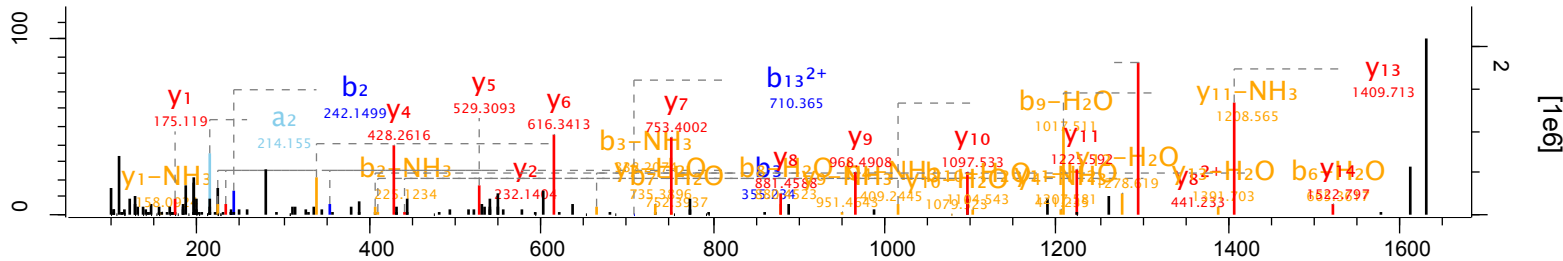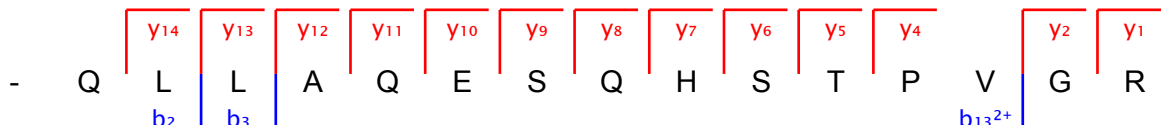

| Raw file                                      | Scan  | Method    | Score  | m/z    | Gene names |
|-----------------------------------------------|-------|-----------|--------|--------|------------|
| 20120720_EXQ2_AtDe_SA_WTR_OG_pooled_final_3_8 | 21505 | FTMS; HCD | 159.09 | 597.34 | Apoa2      |

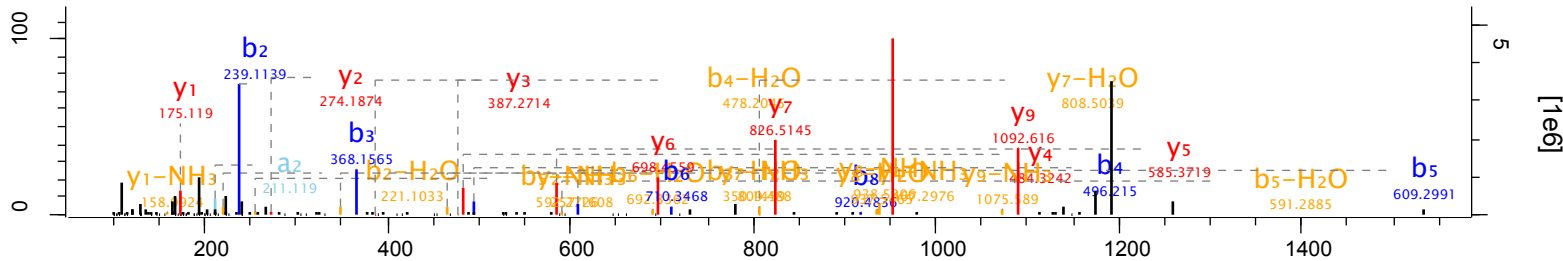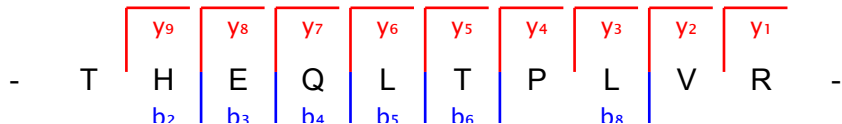



| Raw file                                      | Scan  | Method    | Score | m/z    | Gene names |
|-----------------------------------------------|-------|-----------|-------|--------|------------|
| 20120720_EXQ2_AtDe_SA_WTR_OG_pooled_final_3_8 | 21507 | FTMS; HCD | 89.91 | 398.56 | Apoa2      |

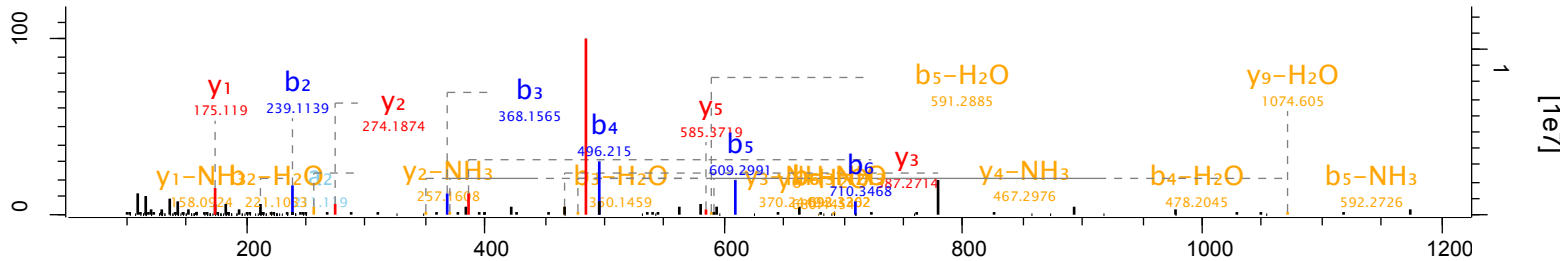

| Raw file                                      | Scan  | Method    | Score | m/z    | Gene names |
|-----------------------------------------------|-------|-----------|-------|--------|------------|
| 20120720_EXQ2_AtDe_SA_WTR_OG_pooled_final_3_8 | 30143 | FTMS; HCD | 45.83 | 521.25 | Syp        |

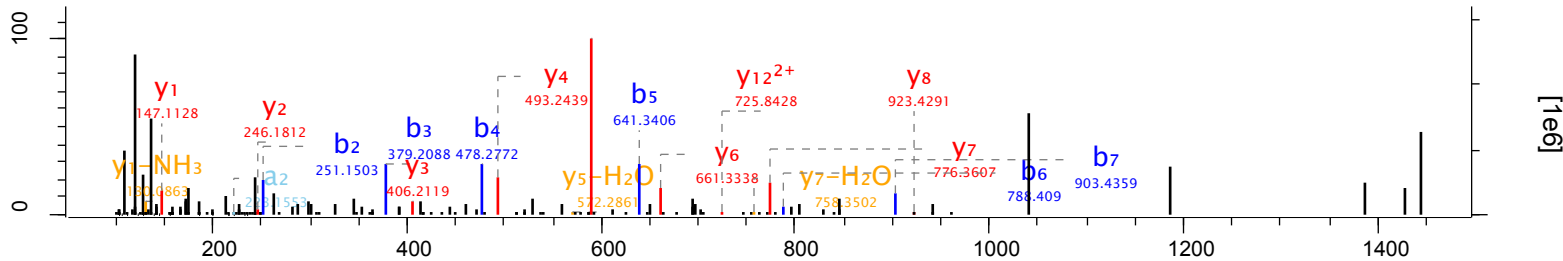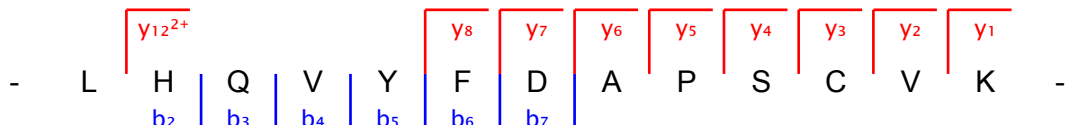

| Raw file                                      | Scan  | Method    | Score | m/z    | Gene names |
|-----------------------------------------------|-------|-----------|-------|--------|------------|
| 20120720_EXQ2_AtDe_SA_WTR_OG_pooled_final_3_8 | 41338 | FTMS; HCD | 64.45 | 678.98 | C8b        |

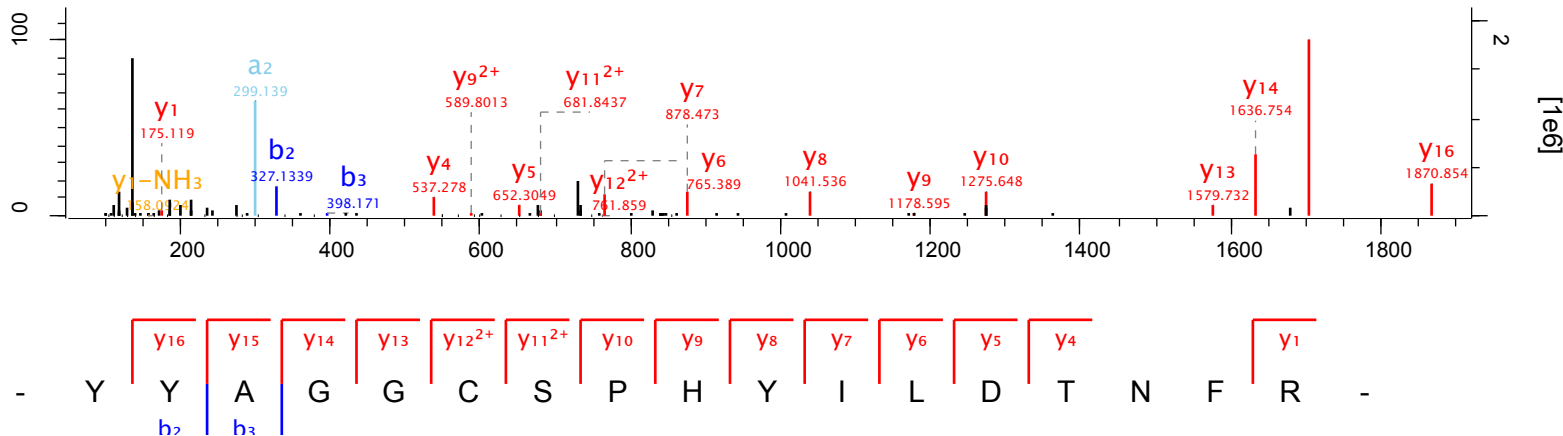

| Raw file                                      | Scan  | Method    | Score | m/z    | Gene names |
|-----------------------------------------------|-------|-----------|-------|--------|------------|
| 20120720_EXQ2_AtDe_SA_WTR_OG_pooled_final_3_8 | 41866 | FTMS; HCD | 73.69 | 613.33 | Scin       |

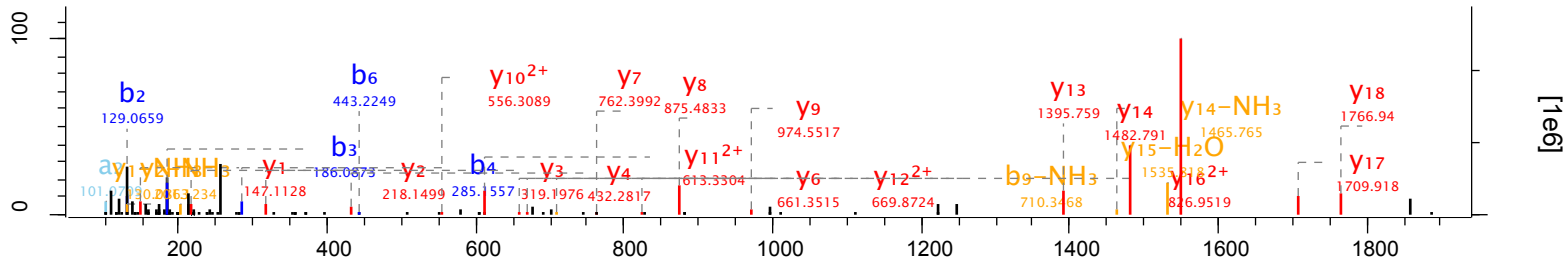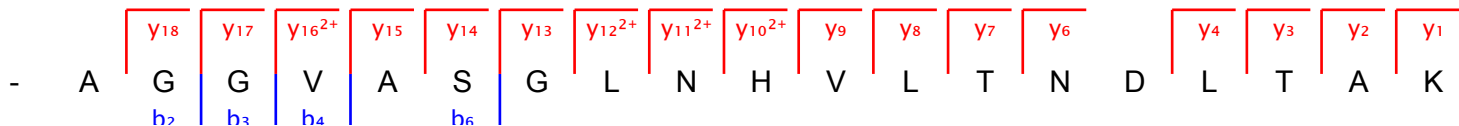

| Raw file                                      | Scan  | Method    | Score | m/z    | Gene names |
|-----------------------------------------------|-------|-----------|-------|--------|------------|
| 20120720_EXQ2_AtDe_SA_WTR_OG_pooled_final_3_8 | 46877 | FTMS; HCD | 89.91 | 569.98 | Cyp2e1     |

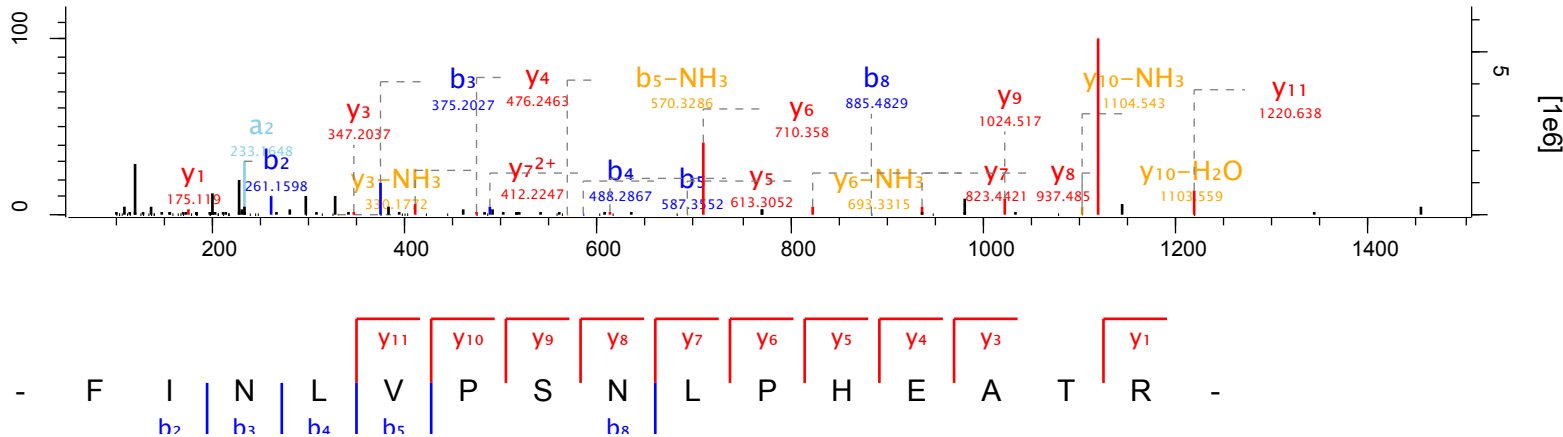

| Raw file                                      | Scan  | Method    | Score | m/z    | Gene names |
|-----------------------------------------------|-------|-----------|-------|--------|------------|
| 20120720_EXQ2_AtDe_SA_WTR_OG_pooled_final_3_8 | 61348 | FTMS; HCD | 81.51 | 744.09 | Adcy4      |

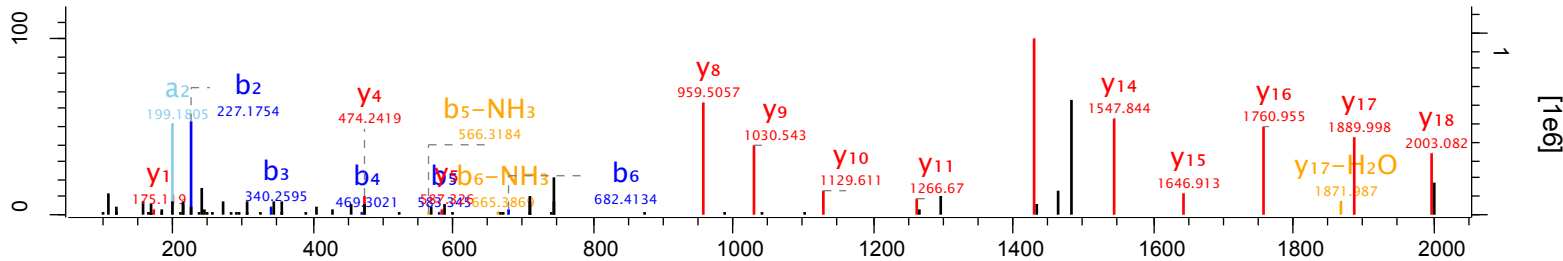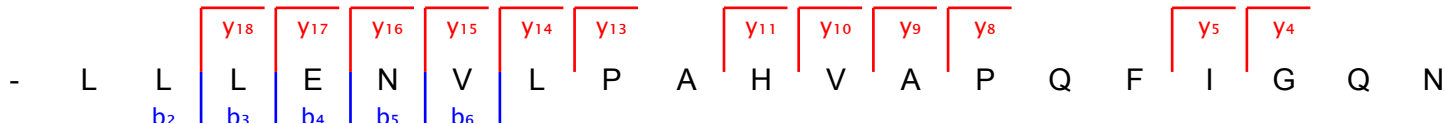

| Raw file                                      | Scan | Method    | Score | m/z    | Gene names   |
|-----------------------------------------------|------|-----------|-------|--------|--------------|
| 20120720_EXQ2_AtDe_SA_WTR_OG_pooled_final_3_8 | 9620 | FTMS; HCD | 82.07 | 399.46 | mt-Co3;Mtco3 |

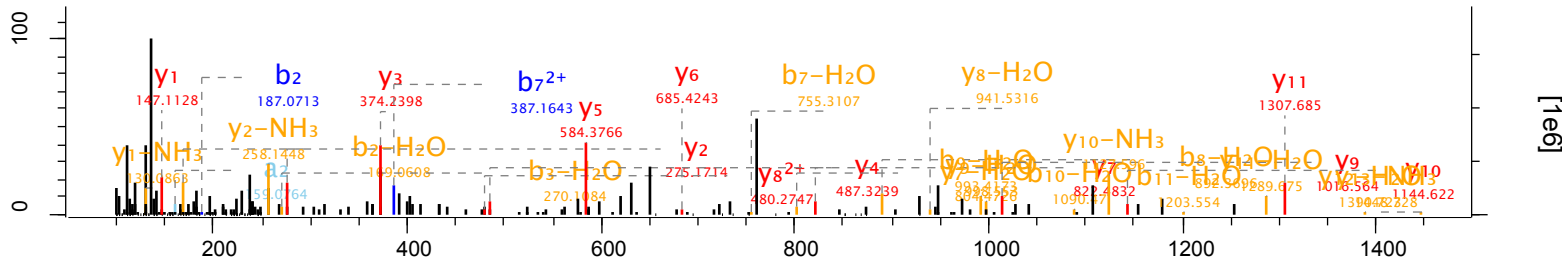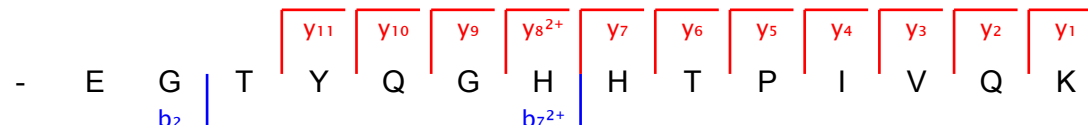

[1e6]

| Raw file                                      | Scan  | Method    | Score | m/z    | Gene names |
|-----------------------------------------------|-------|-----------|-------|--------|------------|
| 20120720_EXQ2_AtDe_SA_WTR_OG_pooled_final_3_9 | 11142 | FTMS; HCD | 95.66 | 553.29 | Map2       |

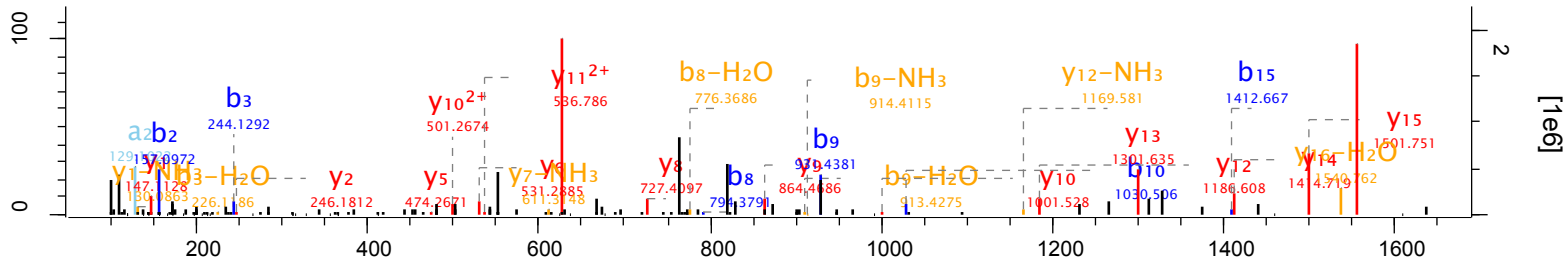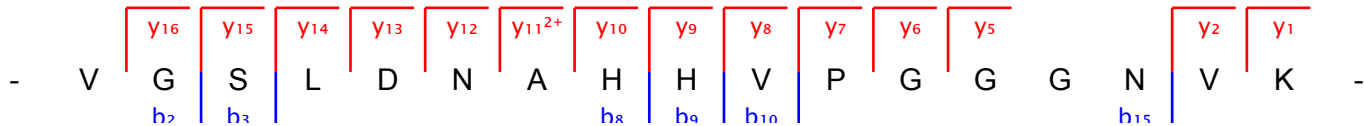



Raw file

20120720\_EXQ2\_AtDe\_SA\_WTR\_OG\_pooled\_final\_3\_9

Scan

13214

Method

FTMS; HCD

Score

92.25

m/z

430.9

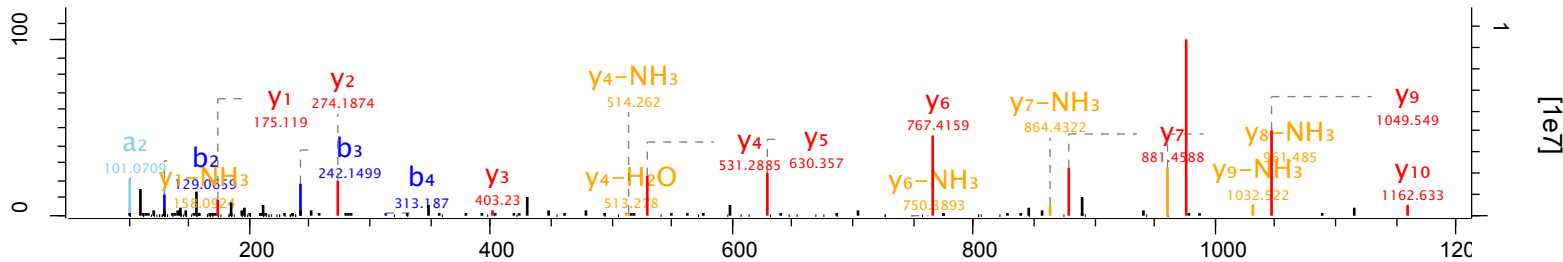

Raw file

Scan

Method

Score

m/z

20120720\_EXQ2\_AtDe\_SA\_WTR\_OG\_pooled\_final\_3\_9

13223

FTMS; HCD

104.24

645.85

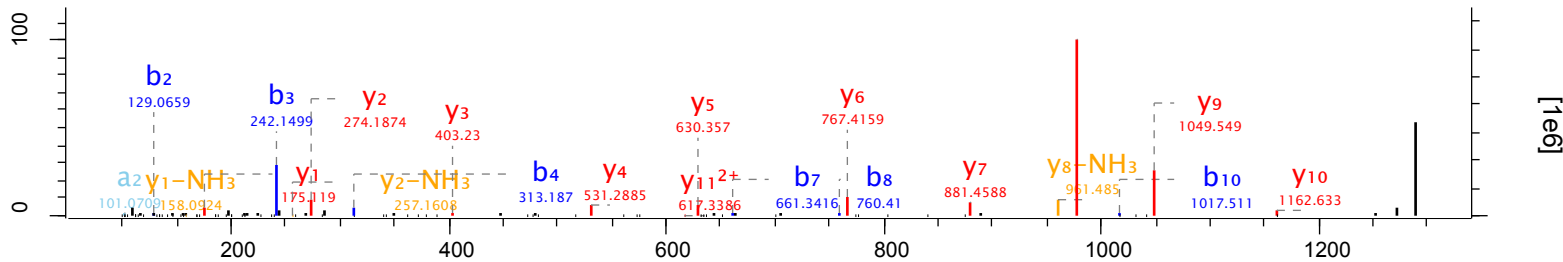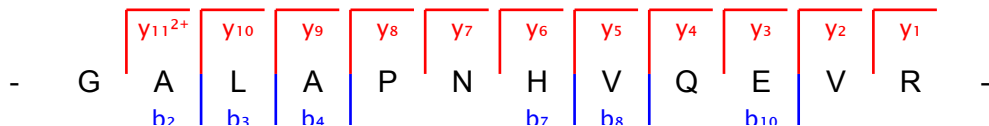

| Raw file                                      | Scan  | Method    | Score | m/z    | Gene names |
|-----------------------------------------------|-------|-----------|-------|--------|------------|
| 20120720_EXQ2_AtDe_SA_WTR_OG_pooled_final_3_9 | 25116 | FTMS; HCD | 80.23 | 354.82 | Apoc3      |

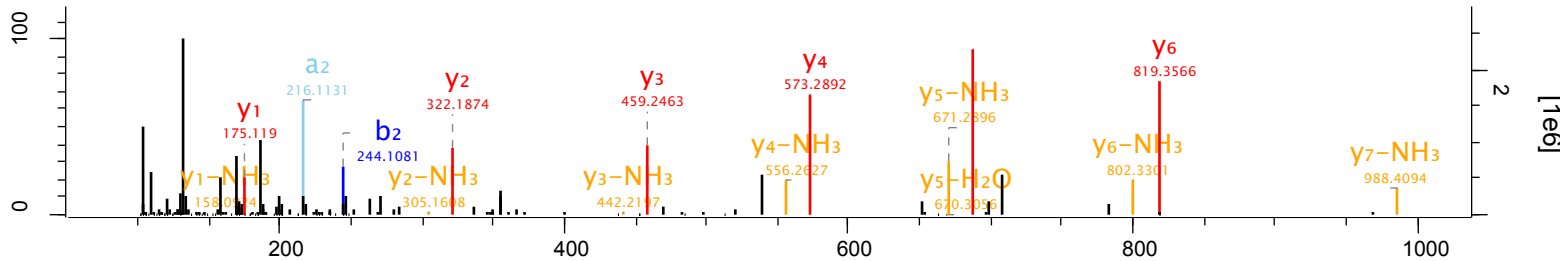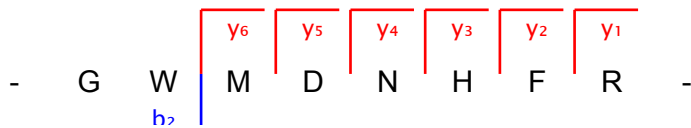

| Raw file                                      | Scan  | Method    | Score  | m/z    | Gene names |
|-----------------------------------------------|-------|-----------|--------|--------|------------|
| 20120720_EXQ2_AtDe_SA_WTR_OG_pooled_final_3_9 | 25123 | FTMS; HCD | 122.13 | 531.73 | Apoc3      |

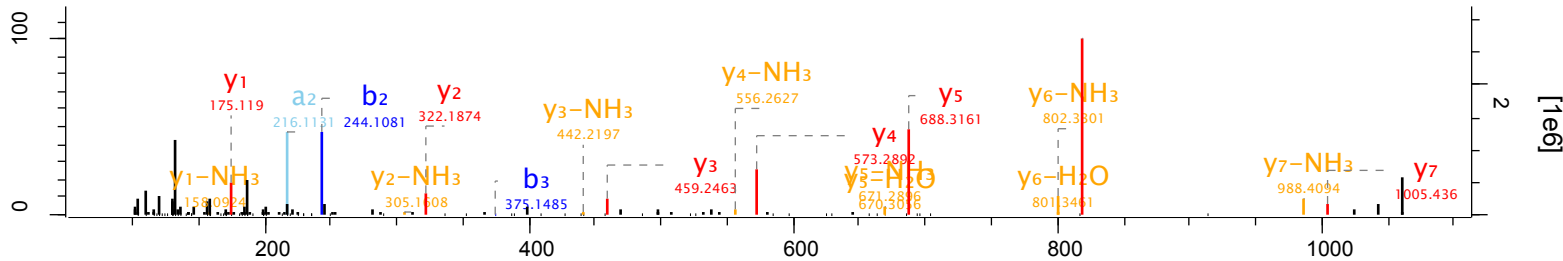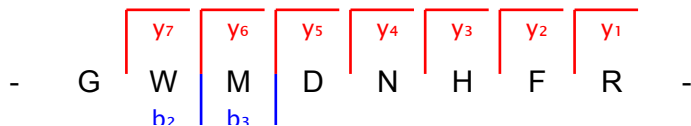

| Raw file                                      | Scan  | Method    | Score | m/z    | Gene names |
|-----------------------------------------------|-------|-----------|-------|--------|------------|
| 20120720_EXQ2_AtDe_SA_WTR_OG_pooled_final_3_9 | 34753 | FTMS; HCD | 66.99 | 383.22 | Clec11a    |

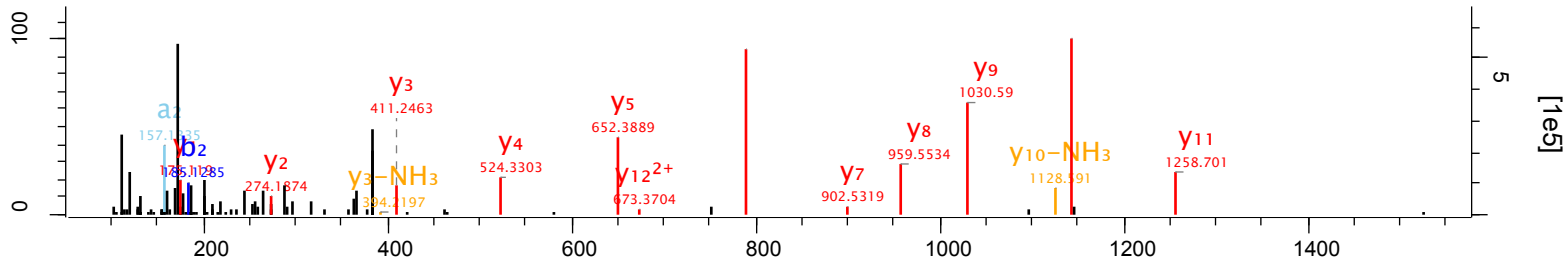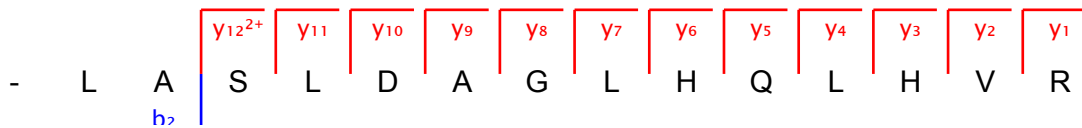

| Raw file                                      | Scan  | Method    | Score | m/z    | Gene names |
|-----------------------------------------------|-------|-----------|-------|--------|------------|
| 20120720_EXQ2_AtDe_SA_WTR_OG_pooled_final_3_9 | 52510 | FTMS; HCD | 49.3  | 482.61 | Znrf1      |

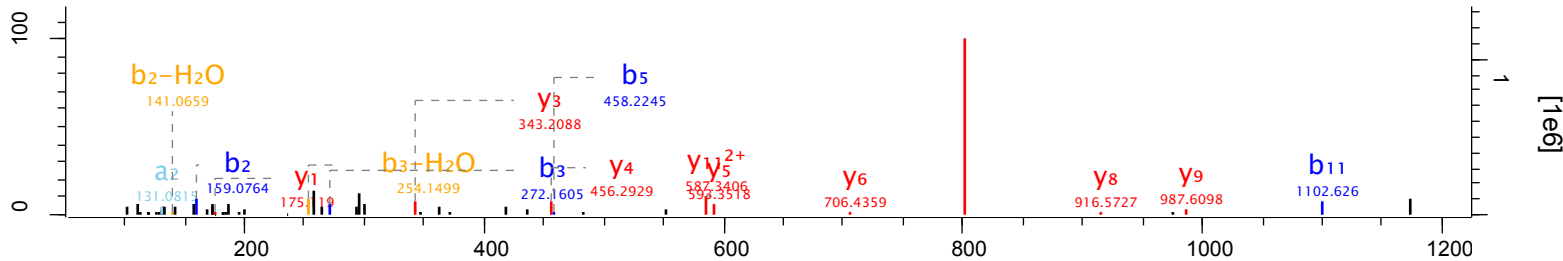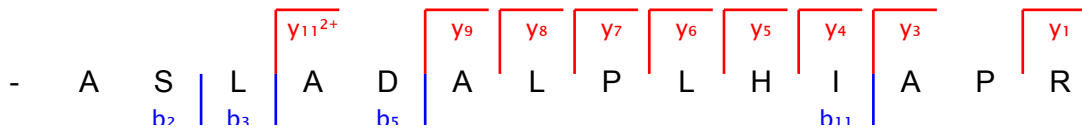



Raw file

20120720\_EXQ2\_AtDe\_SA\_WTR\_OG\_pooled\_final\_3\_9

Scan

8441

Method

FTMS; HCD

Score

64.22

m/z

532.27

Gene names

mt-Co3;Mtco3

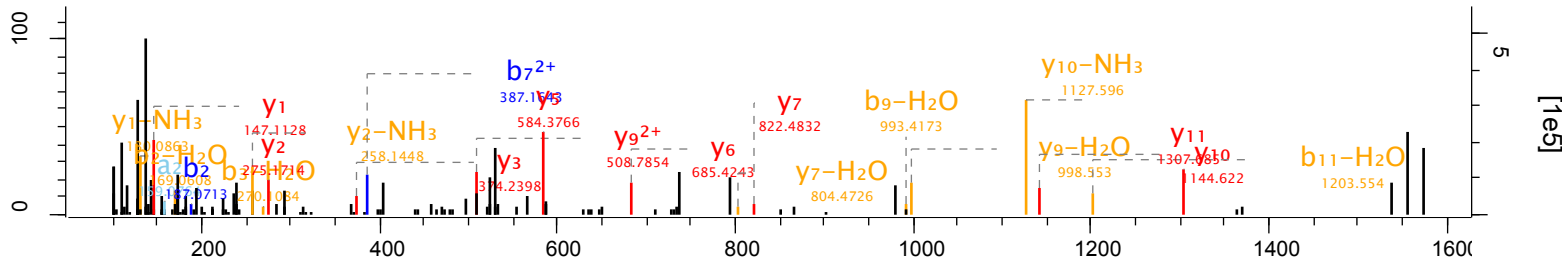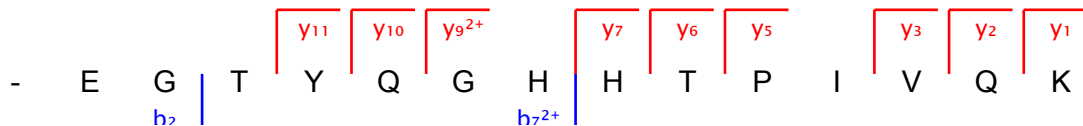



Raw file

20120720\_EXQ2\_AtDe\_SA\_WTR\_OG\_pooled\_final\_3\_9

Scan

8458

Method

FTMS; HCD

Score

75.59

m/z

399.45

Gene names

mt-Co3;Mtco3

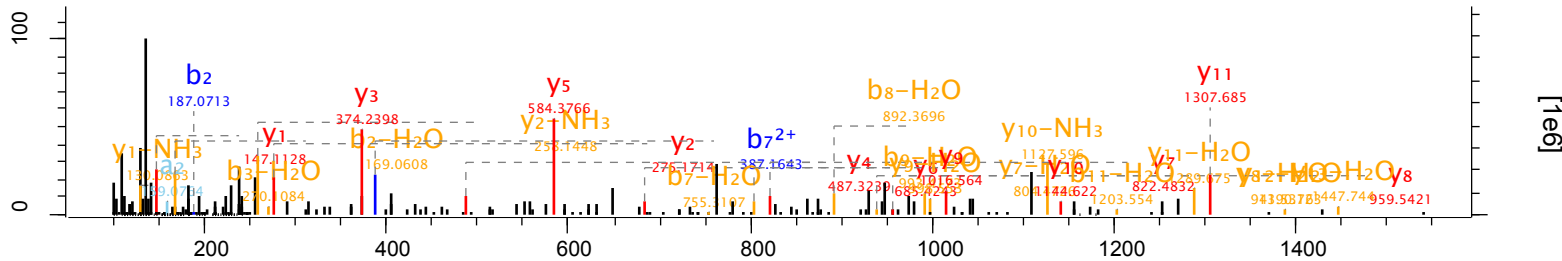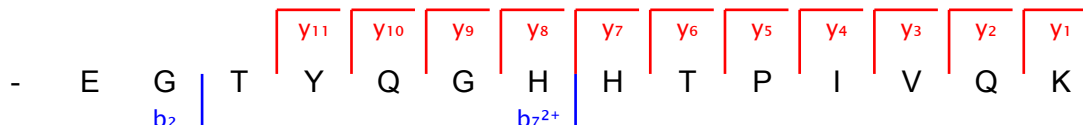

Raw file

20120720\_EXQ2\_AtDe\_SA\_WTR\_OG\_pooled\_final\_3\_9

Scan

8462

Method

FTMS; HCD

Score

105.99

m/z

798.4

Gene names

mt-Co3;Mtco3

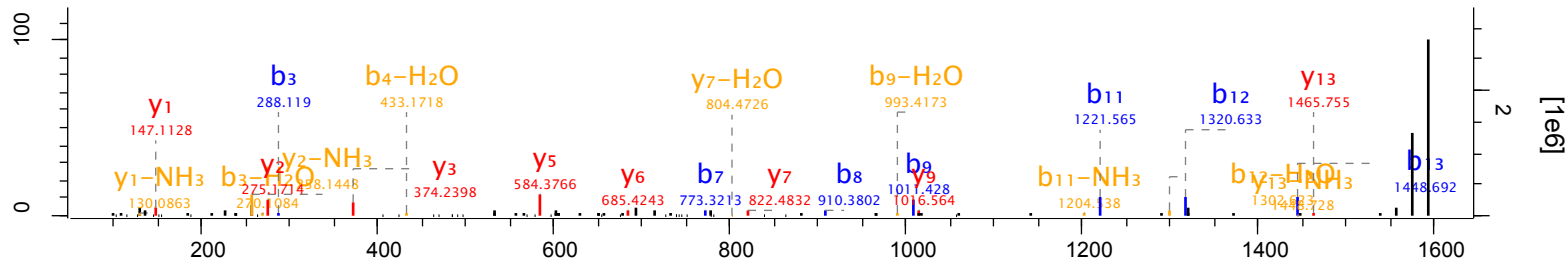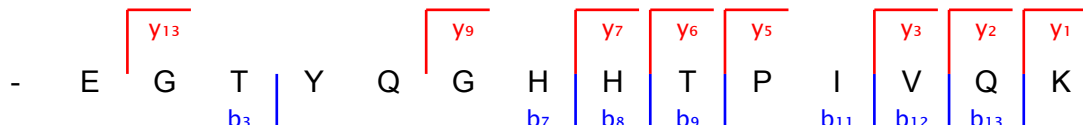

| Raw file                                 | Scan  | Method    | Score | m/z    | Gene names |
|------------------------------------------|-------|-----------|-------|--------|------------|
| 20121213_EXQ1_AtDe_50CM_LFQ_myotubes_OG1 | 10559 | FTMS; HCD | 121.5 | 488.24 | Ebpl       |

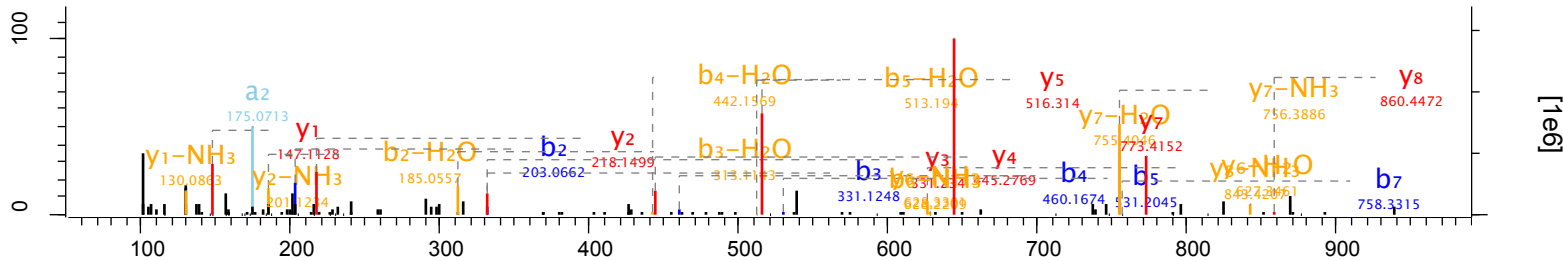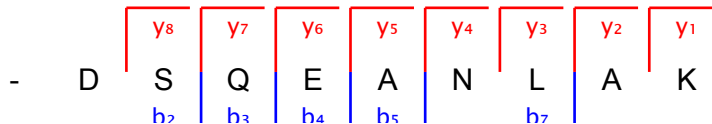

| Raw file                                 | Scan  | Method    | Score  | m/z    | Gene names |
|------------------------------------------|-------|-----------|--------|--------|------------|
| 20121213_EXQ1_AtDe_50CM_LFQ_myotubes_OG1 | 13065 | FTMS; HCD | 107.65 | 728.31 | Leprot1    |

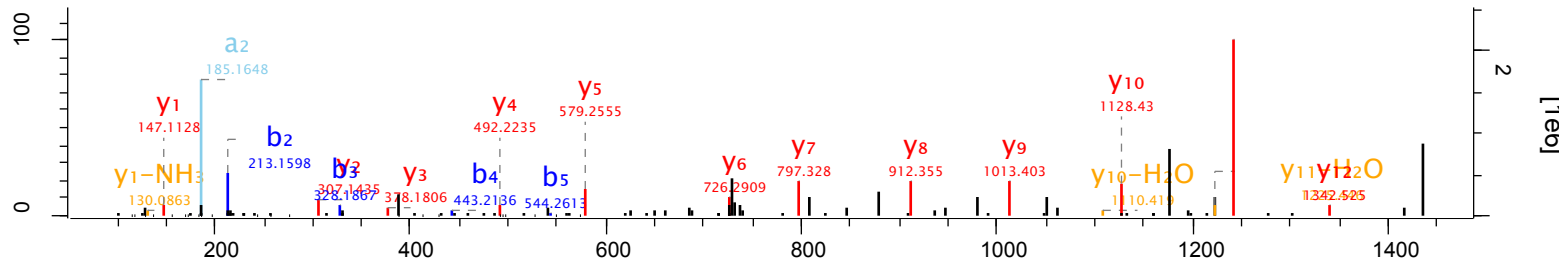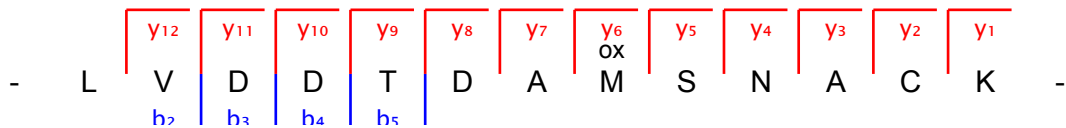

| Raw file                                 | Scan  | Method    | Score  | m/z    | Gene names |
|------------------------------------------|-------|-----------|--------|--------|------------|
| 20121213_EXQ1_AtDe_50CM_LFQ_myotubes_OG1 | 18731 | FTMS; HCD | 143.42 | 683.79 | Fxyd1      |

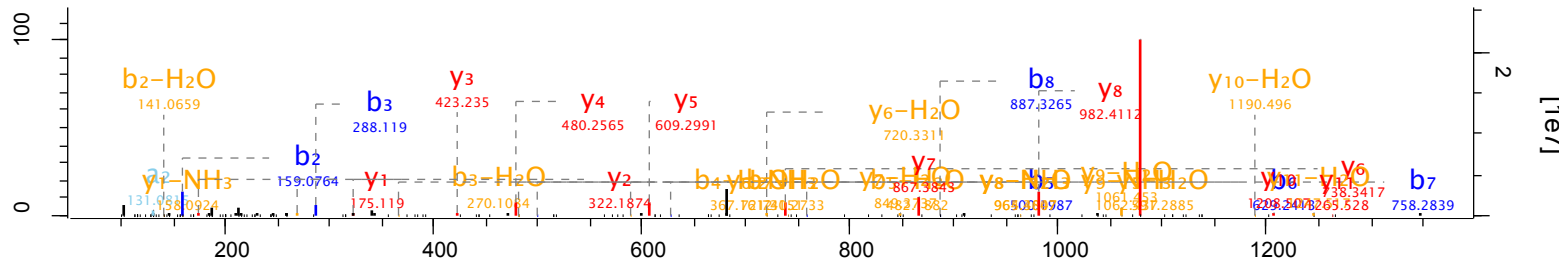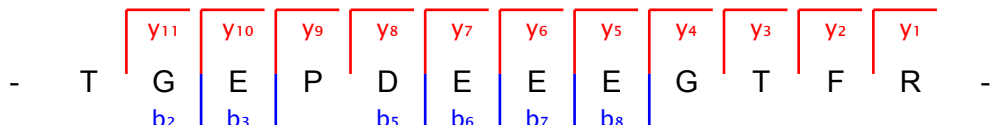

| Raw file                                 | Scan  | Method    | Score | m/z    | Gene names |
|------------------------------------------|-------|-----------|-------|--------|------------|
| 20121213_EXQ1_AtDe_50CM_LFQ_myotubes_OG1 | 21589 | FTMS; HCD | 99.94 | 720.31 | Leprot11   |

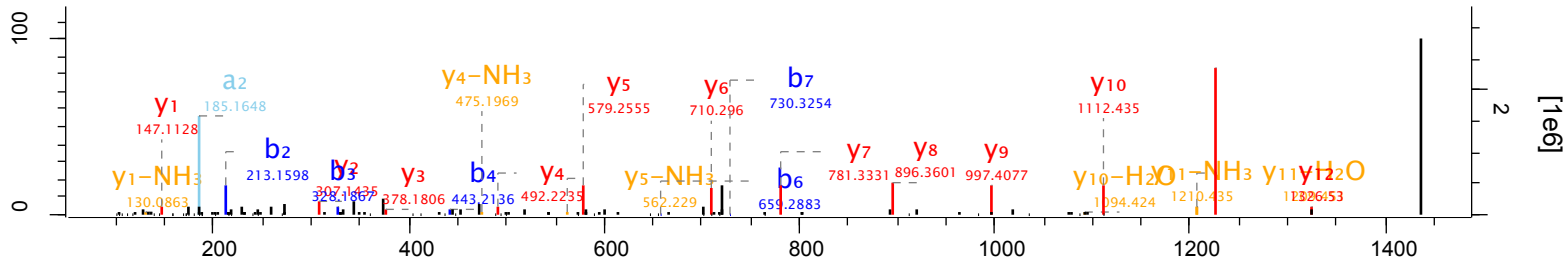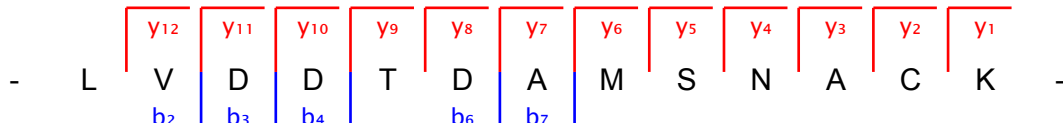

| Raw file                                 | Scan  | Method    | Score  | m/z    | Gene names |
|------------------------------------------|-------|-----------|--------|--------|------------|
| 20121213_EXQ1_AtDe_50CM_LFQ_myotubes_OG1 | 22018 | FTMS; HCD | 143.42 | 646.32 | Mkrn1      |

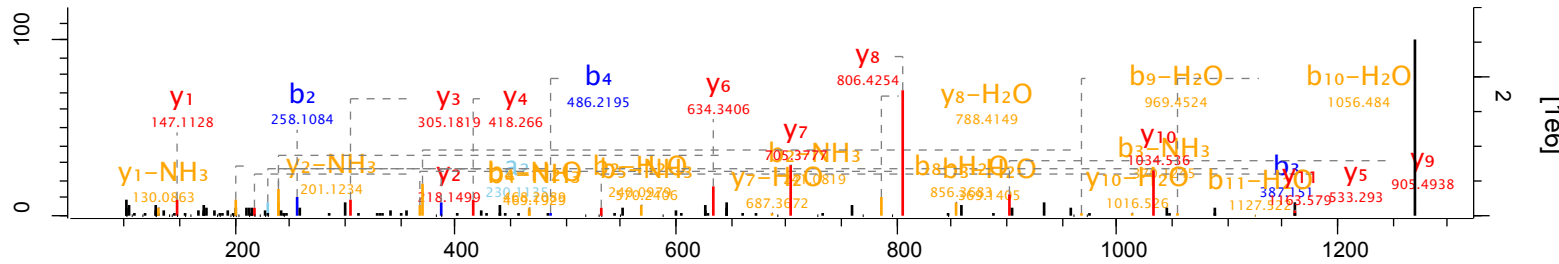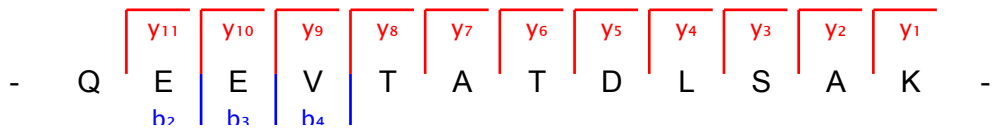

| Raw file                                 | Scan  | Method    | Score | m/z    | Gene names |
|------------------------------------------|-------|-----------|-------|--------|------------|
| 20121213_EXQ1_AtDe_50CM_LFQ_myotubes_OG1 | 23642 | FTMS; HCD | 93.48 | 752.35 | Mapk11     |

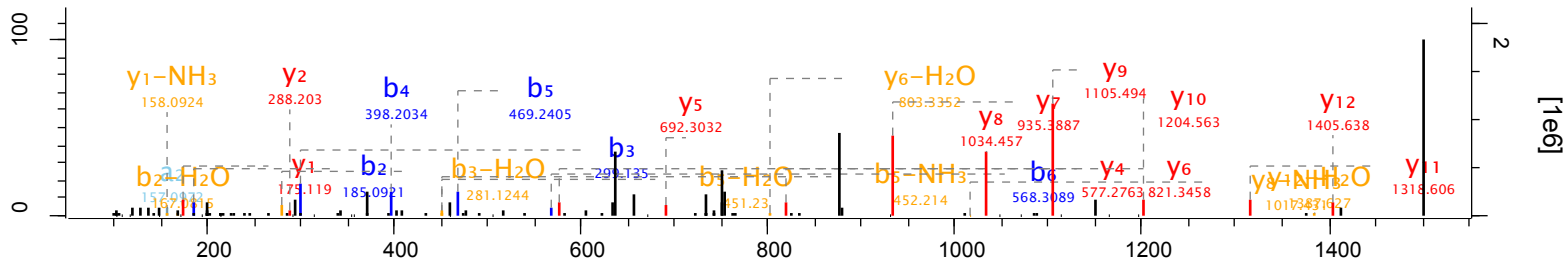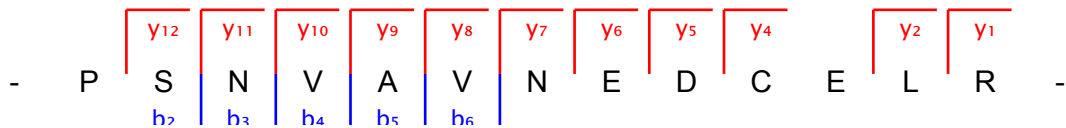



| Raw file                                 | Scan  | Method    | Score | m/z     | Gene names |
|------------------------------------------|-------|-----------|-------|---------|------------|
| 20121213_EXQ1_AtDe_50CM_LFQ_myotubes_OG1 | 27194 | FTMS; HCD | 79.14 | 1067.44 | Emp1       |

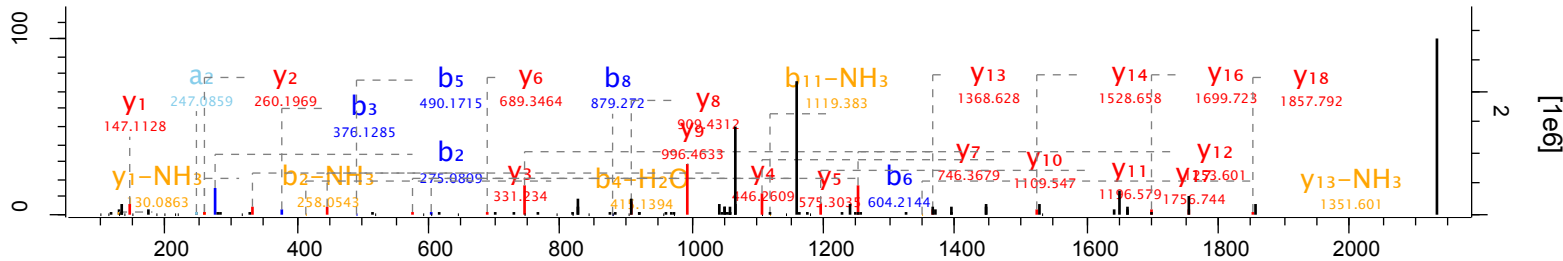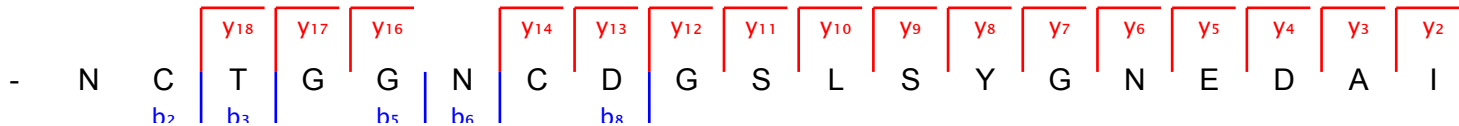

| Raw file                                 | Scan  | Method    | Score  | m/z    | Gene names |
|------------------------------------------|-------|-----------|--------|--------|------------|
| 20121213_EXQ1_AtDe_50CM_LFQ_myotubes_OG1 | 30210 | FTMS; HCD | 125.03 | 658.84 | Ing2       |

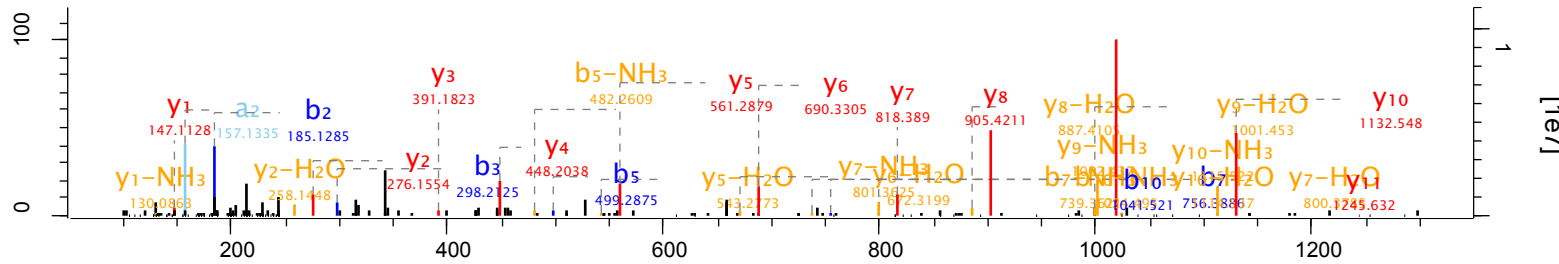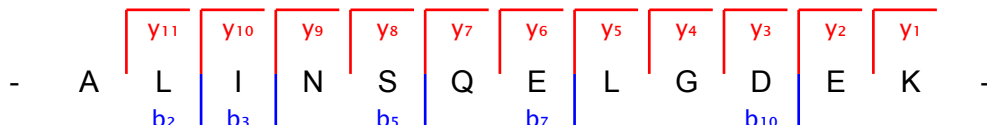

| Raw file                                 | Scan  | Method    | Score | m/z    | Gene names   |
|------------------------------------------|-------|-----------|-------|--------|--------------|
| 20121213_EXQ1_AtDe_50CM_LFQ_myotubes_OG1 | 32077 | FTMS; HCD | 99.06 | 836.36 | mt-Nd3;Mtnd3 |

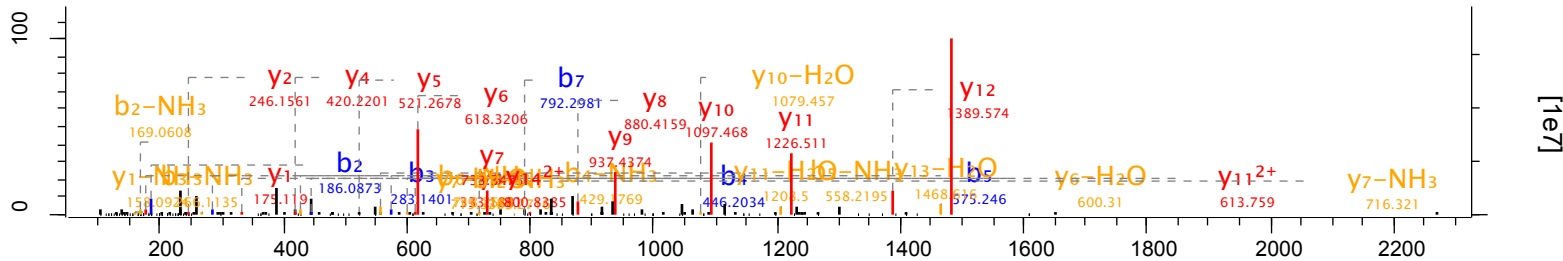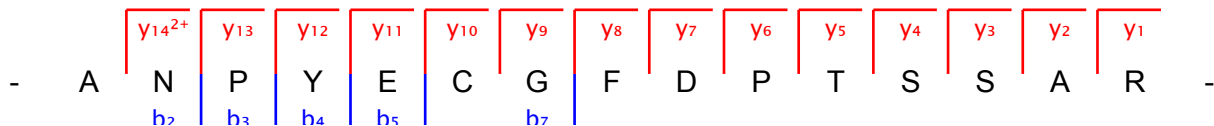

| Raw file                                 | Scan  | Method    | Score | m/z    | Gene names   |
|------------------------------------------|-------|-----------|-------|--------|--------------|
| 20121213_EXQ1_AtDe_50CM_LFQ_myotubes_OG1 | 32129 | FTMS; HCD | 75.97 | 558.24 | mt-Nd3;Mtnd3 |

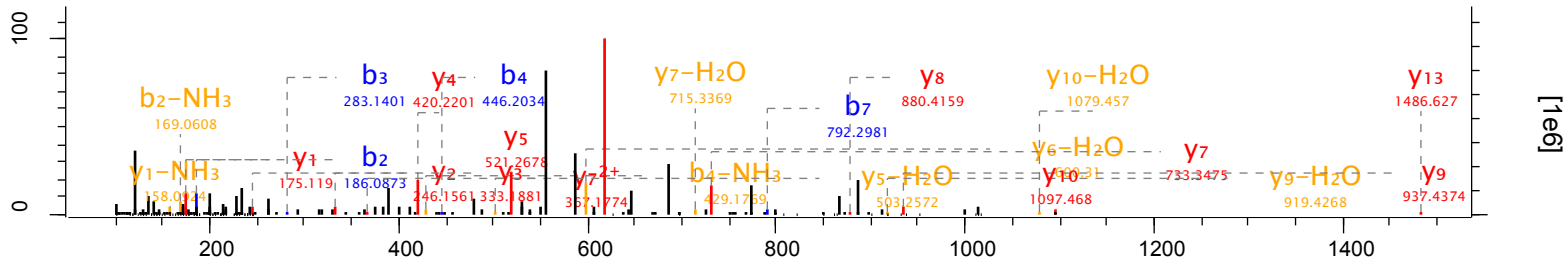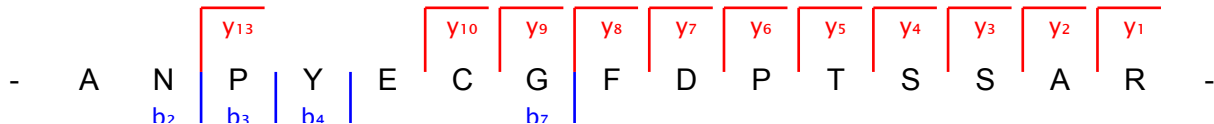

| Raw file                                 | Scan  | Method    | Score | m/z    | Gene names |
|------------------------------------------|-------|-----------|-------|--------|------------|
| 20121213_EXQ1_AtDe_50CM_LFQ_myotubes_OG1 | 34080 | FTMS; HCD | 149.4 | 476.24 | Mapk15     |

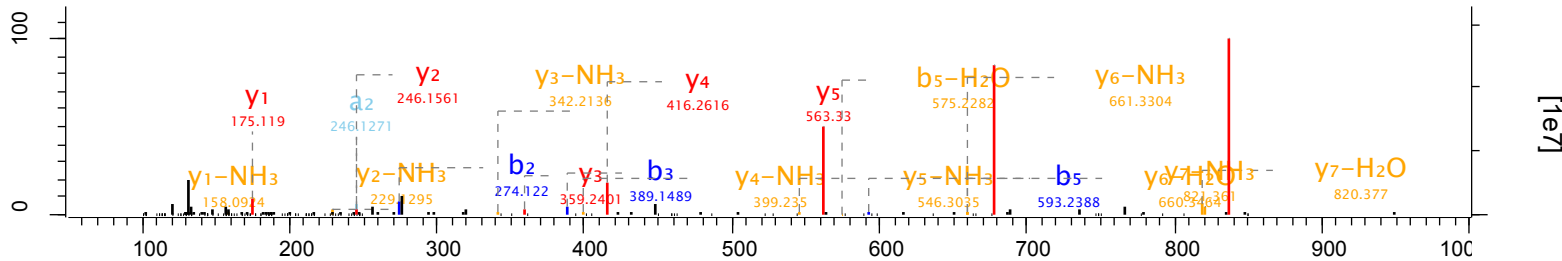

| Raw file                                 | Scan  | Method    | Score | m/z    | Gene names |
|------------------------------------------|-------|-----------|-------|--------|------------|
| 20121213_EXQ1_AtDe_50CM_LFQ_myotubes_OG1 | 45305 | FTMS; HCD | 39.82 | 664.65 | Cdc42ep5   |

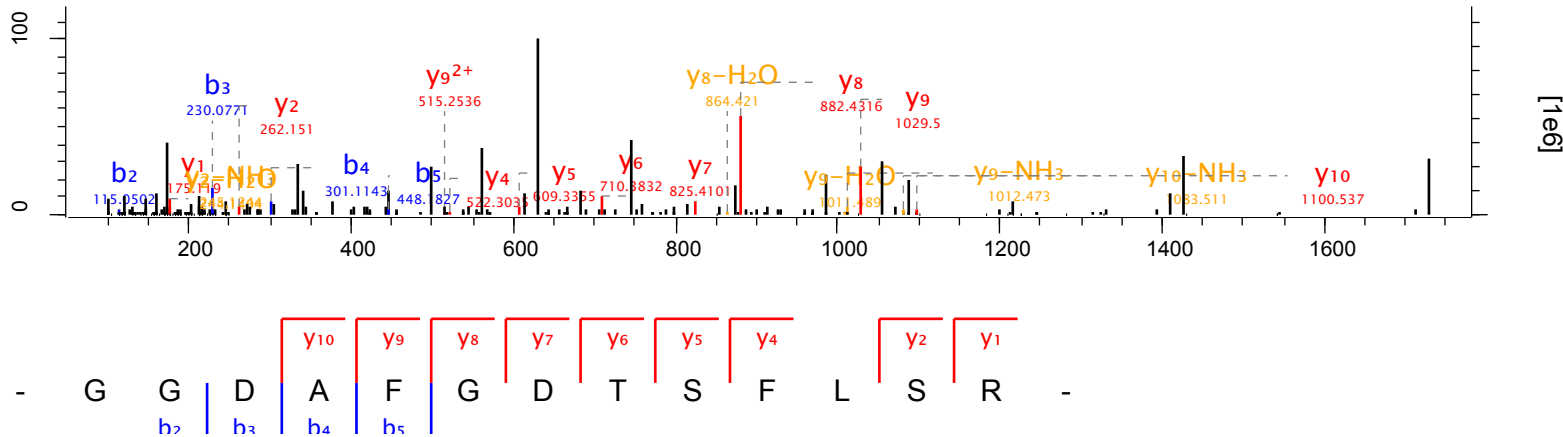

| Raw file                                 | Scan  | Method    | Score  | m/z    | Gene names |
|------------------------------------------|-------|-----------|--------|--------|------------|
| 20121213_EXQ1_AtDe_50CM_LFQ_myotubes_OG1 | 52840 | FTMS; HCD | 129.66 | 966.46 | Tmem128    |

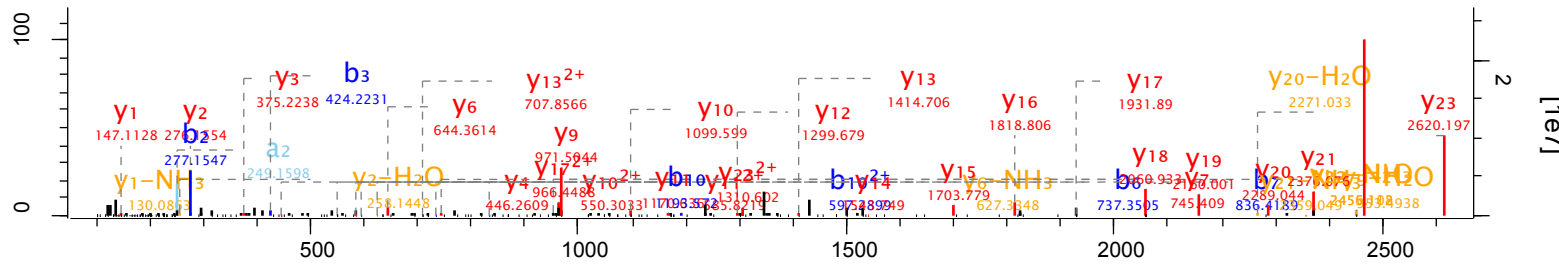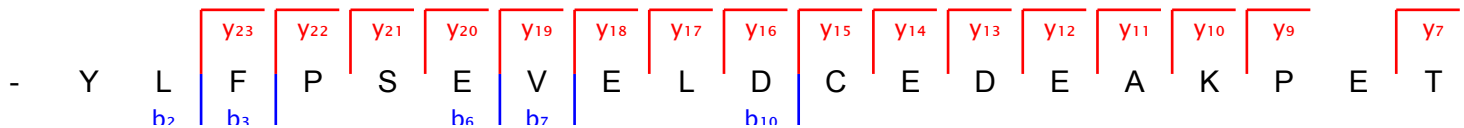

| Raw file                                 | Scan  | Method    | Score  | m/z    | Gene names |
|------------------------------------------|-------|-----------|--------|--------|------------|
| 20121213_EXQ1_AtDe_50CM_LFQ_myotubes_OG1 | 55099 | FTMS; HCD | 134.98 | 991.01 | Ube2w      |

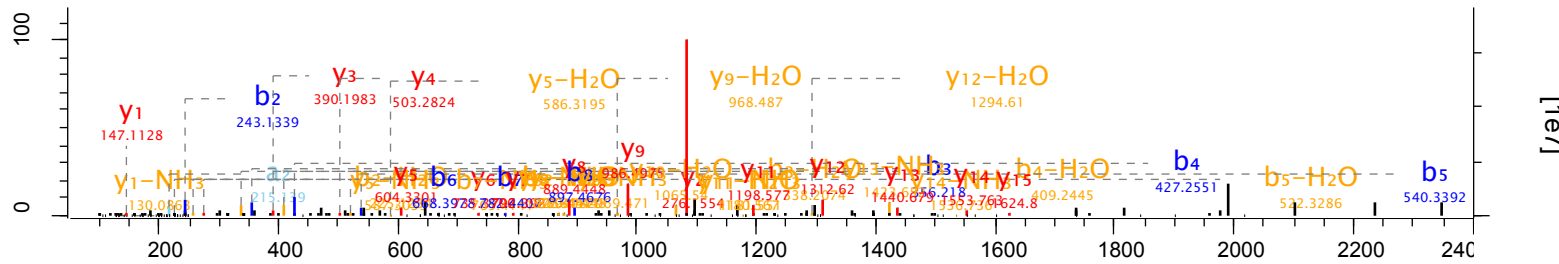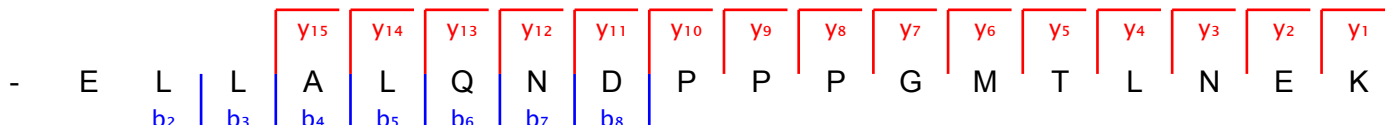



| Raw file                                 | Scan  | Method    | Score | m/z     | Gene names |
|------------------------------------------|-------|-----------|-------|---------|------------|
| 20121213_EXQ1_AtDe_50CM_LFQ_myotubes_OG1 | 56146 | FTMS; HCD | 128.4 | 1332.17 | Slc31a2    |

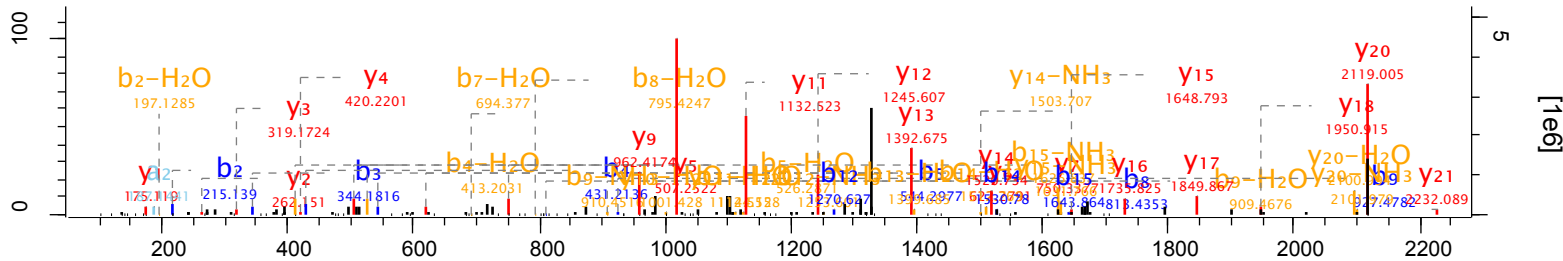

- T L E S L P A T N S Q Q F I L G P D Q

b<sub>2</sub> | b<sub>3</sub> | b<sub>4</sub> | y<sub>21</sub> | y<sub>20</sub> | y<sub>18</sub> | y<sub>17</sub> | y<sub>16</sub> | y<sub>15</sub> | y<sub>14</sub> | y<sub>13</sub> | y<sub>12</sub> | y<sub>11</sub> | y<sub>10</sub> | y<sub>9</sub> | y<sub>7</sub>

b<sub>2</sub> | b<sub>3</sub> | b<sub>4</sub> | b<sub>5</sub> | b<sub>8</sub> | b<sub>9</sub> | b<sub>12</sub> | b<sub>14</sub> | b<sub>15</sub>

| Raw file                                 | Scan  | Method    | Score | m/z    | Gene names |
|------------------------------------------|-------|-----------|-------|--------|------------|
| 20121213_EXQ1_AtDe_50CM_LFQ_myotubes_OG1 | 56207 | FTMS; HCD | 71.06 | 888.77 | Slc31a2    |

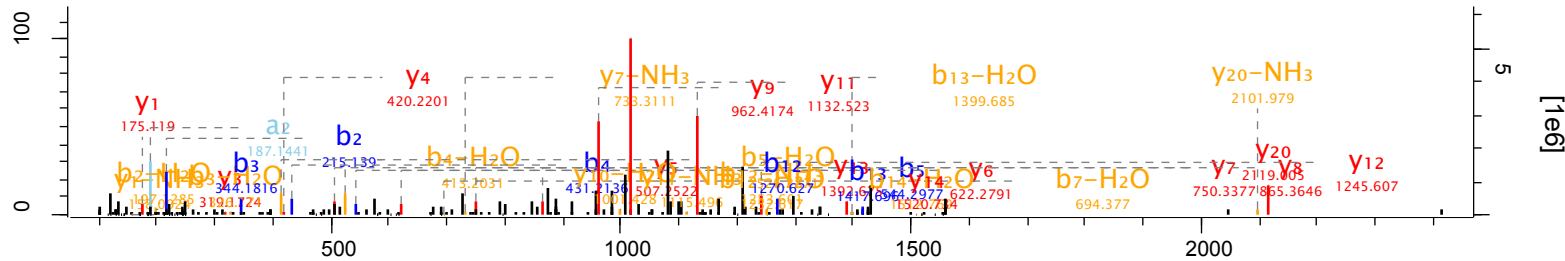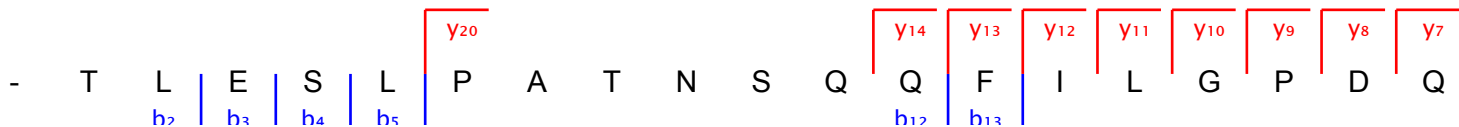

| Raw file                                 | Scan  | Method    | Score  | m/z    | Gene names |
|------------------------------------------|-------|-----------|--------|--------|------------|
| 20121213_EXQ1_AtDe_50CM_LFQ_myotubes_OG1 | 57823 | FTMS; HCD | 100.22 | 751.91 | Nfyb       |

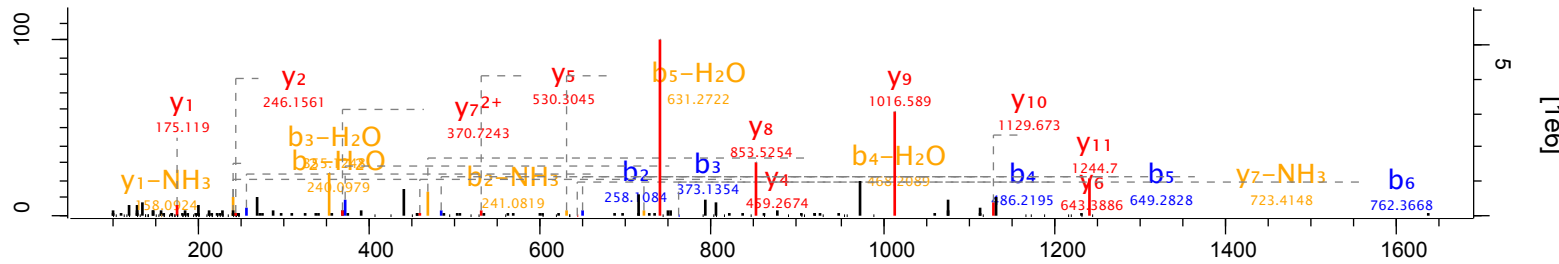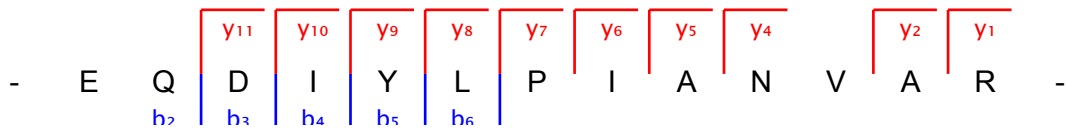

| Raw file                                 | Scan  | Method    | Score | m/z    | Gene names |
|------------------------------------------|-------|-----------|-------|--------|------------|
| 20121213_EXQ1_AtDe_50CM_LFQ_myotubes_OG1 | 57987 | FTMS; HCD | 65.47 | 858.95 | Adsl       |

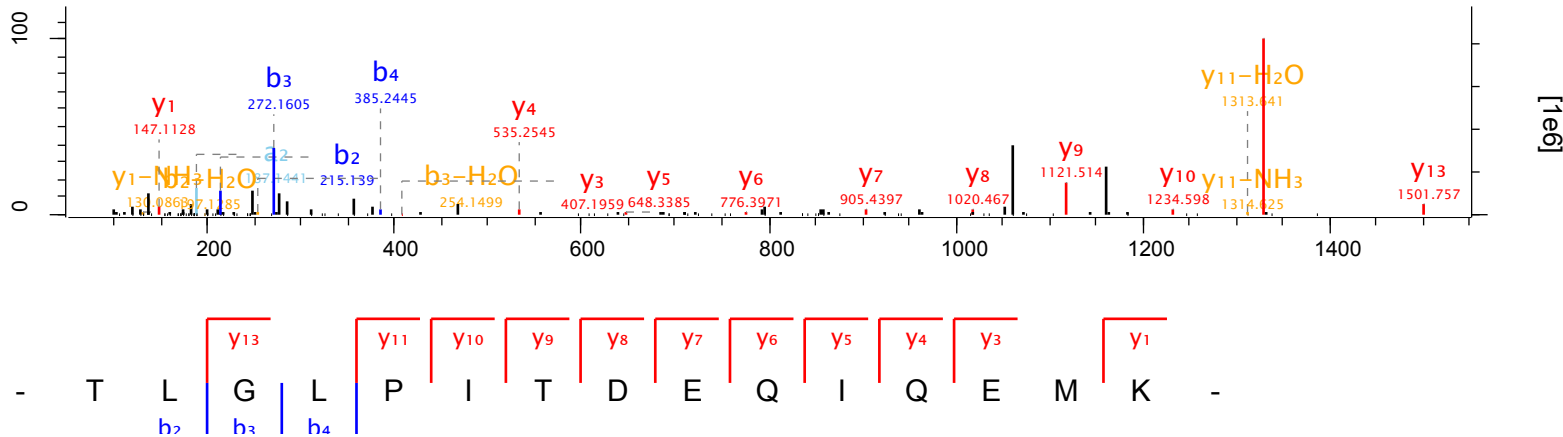

| Raw file                                 | Scan  | Method    | Score  | m/z    | Gene names |
|------------------------------------------|-------|-----------|--------|--------|------------|
| 20121213_EXQ1_AtDe_50CM_LFQ_myotubes_OG1 | 58646 | FTMS; HCD | 118.28 | 646.32 | Naf1       |

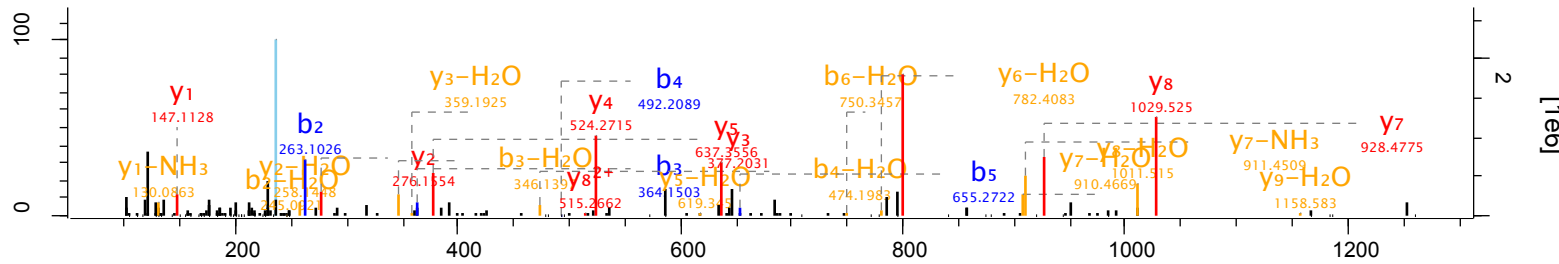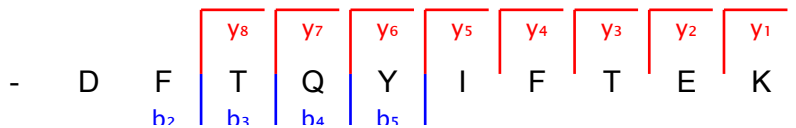

| Raw file                                 | Scan  | Method    | Score  | m/z     | Gene names |
|------------------------------------------|-------|-----------|--------|---------|------------|
| 20121213_EXQ1_AtDe_50CM_LFQ_myotubes_OG1 | 58852 | FTMS; HCD | 109.42 | 1323.67 | Mapk1ip1l  |

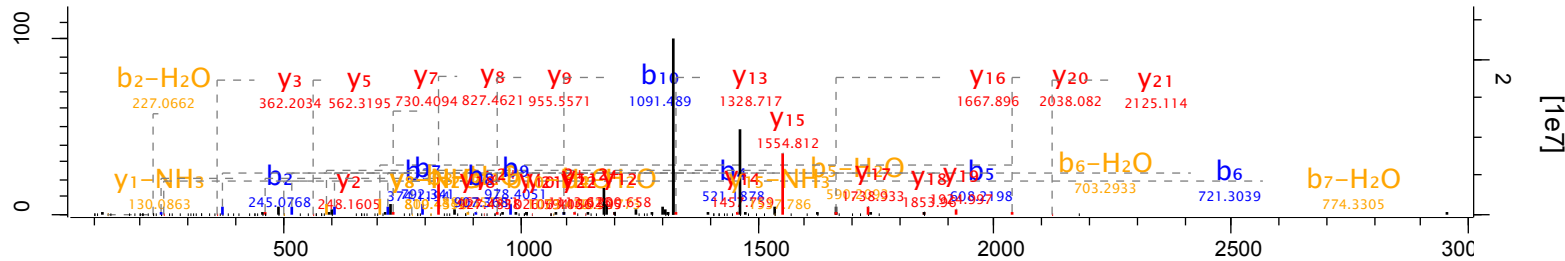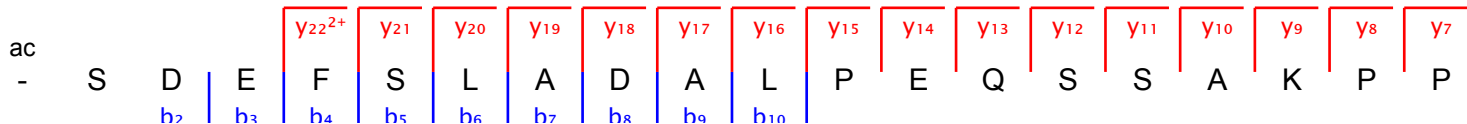

| Raw file                                 | Scan  | Method    | Score | m/z    | Gene names |
|------------------------------------------|-------|-----------|-------|--------|------------|
| 20121213_EXQ1_AtDe_50CM_LFQ_myotubes_OG1 | 58860 | FTMS; HCD | 116.7 | 882.77 | Mapk1ip1l  |

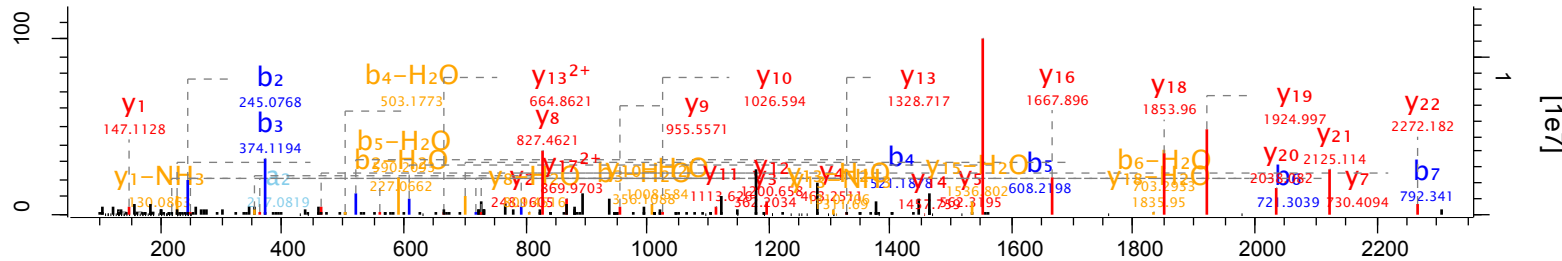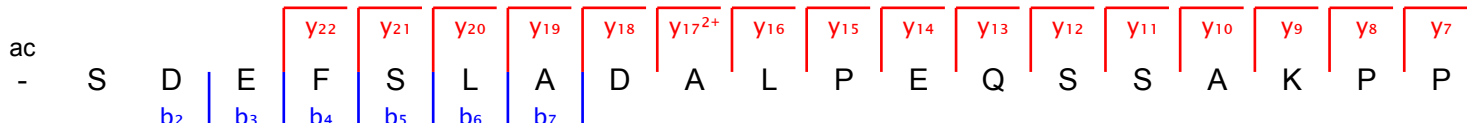

| Raw file                                 | Scan  | Method    | Score | m/z    | Gene names    |
|------------------------------------------|-------|-----------|-------|--------|---------------|
| 20121213_EXQ1_AtDe_50CM_LFQ_myotubes_OG1 | 61568 | FTMS; HCD | 81.57 | 877.98 | 2610015P09Rik |

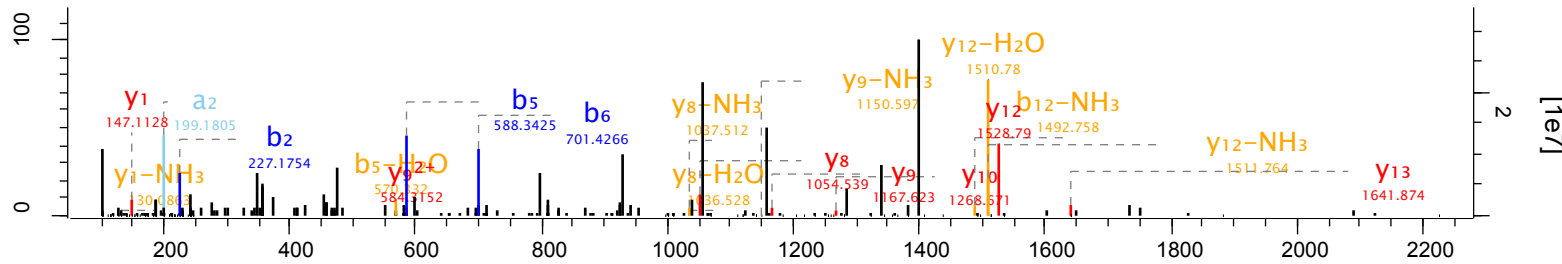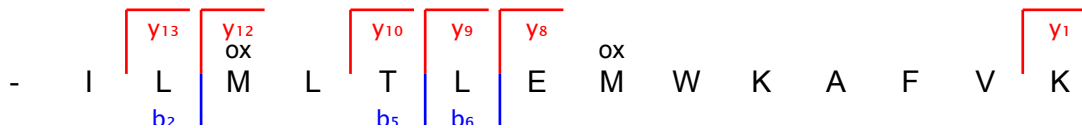



| Raw file                                 | Scan  | Method    | Score  | m/z    | Gene names |
|------------------------------------------|-------|-----------|--------|--------|------------|
| 20121213_EXQ1_AtDe_50CM_LFQ_myotubes_OG1 | 63268 | FTMS; HCD | 130.47 | 860.95 | Fam188a    |

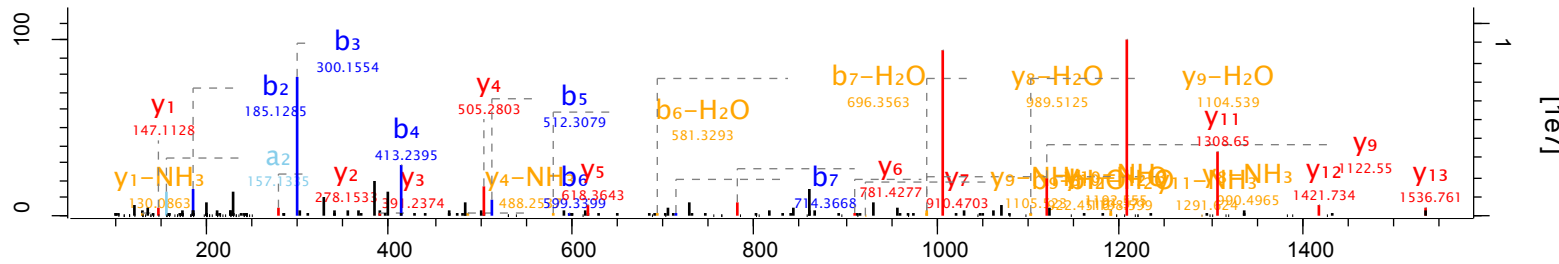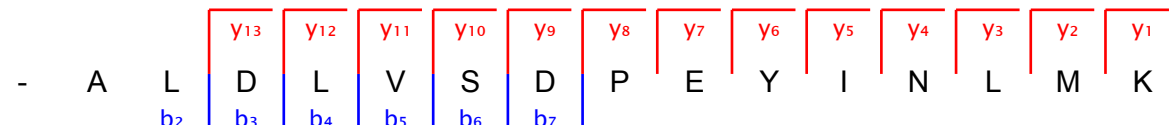

Raw file

20121213\_EXQ1\_AtDe\_50CM\_LFQ\_myotubes\_OG10

Scan

14152

Method

FTMS; HCD

Score

51.73

m/z

532.61

Gene names

mt-Co3;Mtco3

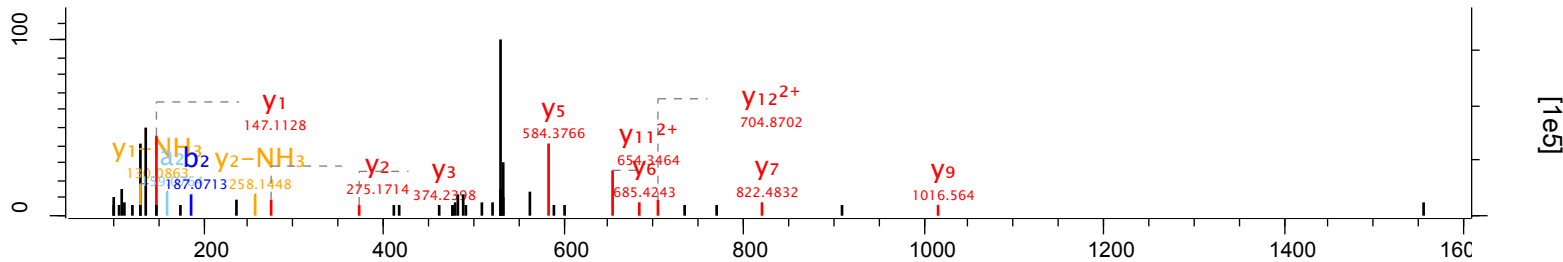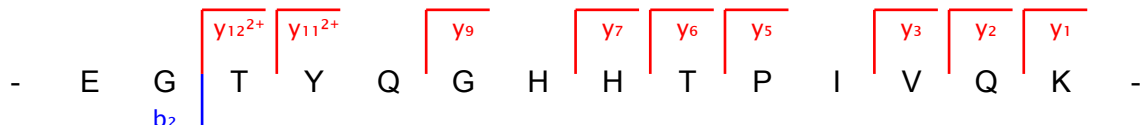

| Raw file                                  | Scan  | Method    | Score | m/z    | Gene names |
|-------------------------------------------|-------|-----------|-------|--------|------------|
| 20121213_EXQ1_AtDe_50CM_LFQ_myotubes_OG10 | 17152 | FTMS; HCD | 73.44 | 444.56 | Insig1     |

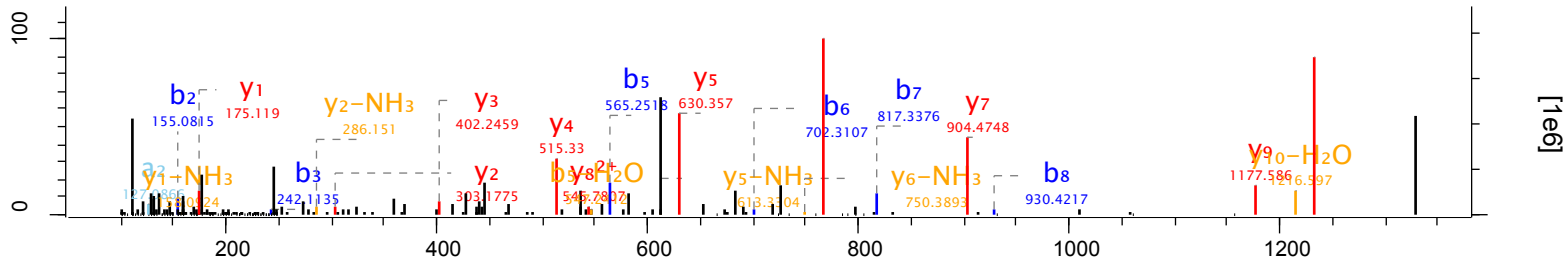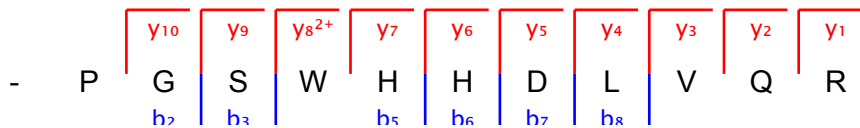

| Raw file                                  | Scan  | Method    | Score | m/z    | Gene names |
|-------------------------------------------|-------|-----------|-------|--------|------------|
| 20121213_EXQ1_AtDe_50CM_LFQ_myotubes_OG10 | 17158 | FTMS; HCD | 60.94 | 333.67 | Insig1     |

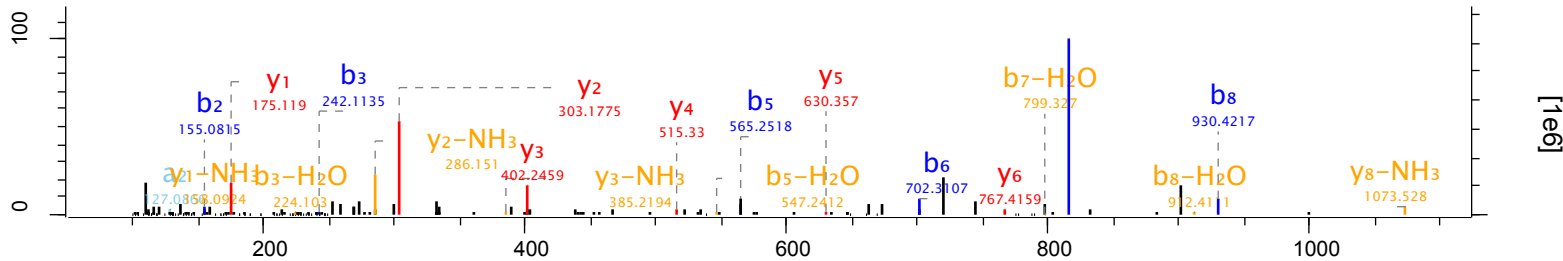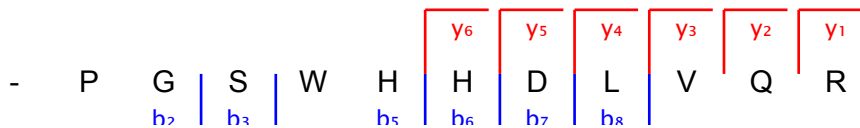

| Raw file                                  | Scan  | Method    | Score  | m/z   | Gene names |
|-------------------------------------------|-------|-----------|--------|-------|------------|
| 20121213_EXQ1_AtDe_50CM_LFQ_myotubes_OG10 | 18075 | FTMS; HCD | 124.84 | 509.5 | Vegfa      |

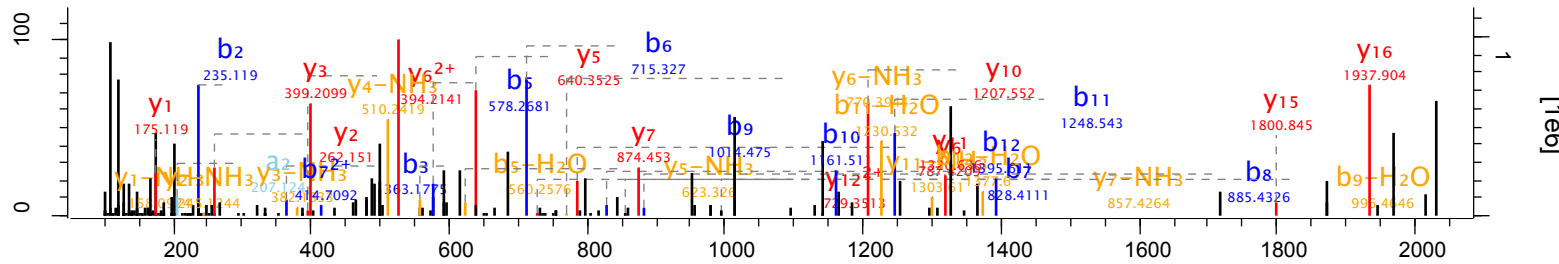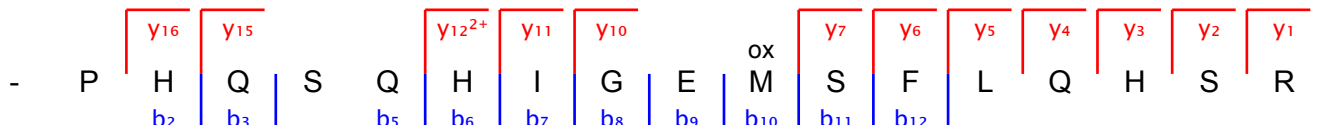

| Raw file                                  | Scan  | Method    | Score  | m/z    | Gene names |
|-------------------------------------------|-------|-----------|--------|--------|------------|
| 20121213_EXQ1_AtDe_50CM_LFQ_myotubes_OG10 | 19833 | FTMS; HCD | 107.06 | 614.79 | Cep44      |

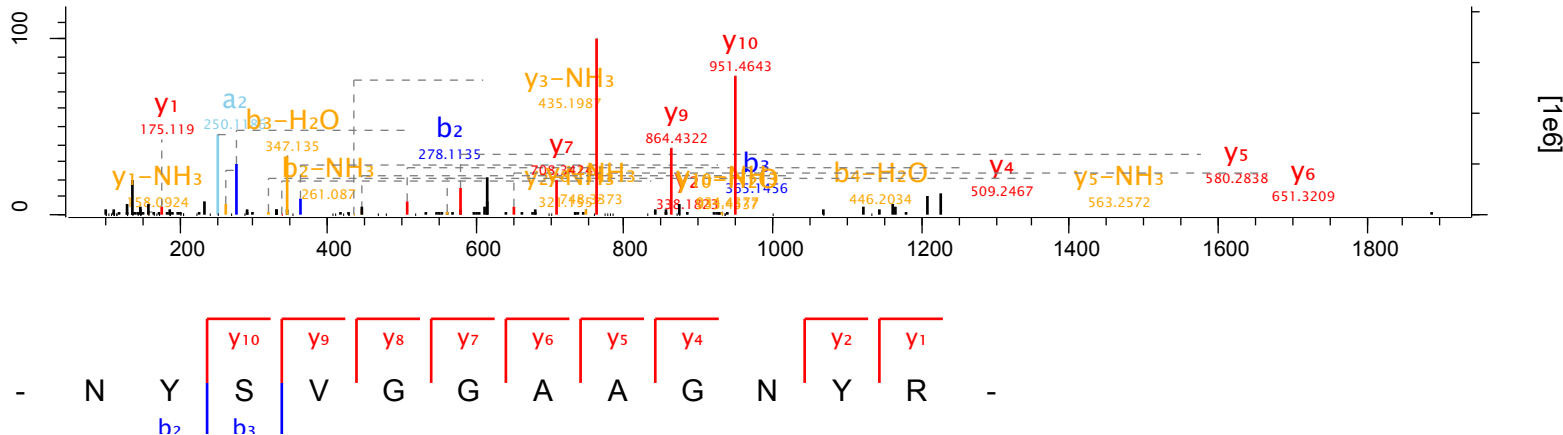

| Raw file                                  | Scan  | Method    | Score | m/z   | Gene names |
|-------------------------------------------|-------|-----------|-------|-------|------------|
| 20121213_EXQ1_AtDe_50CM_LFQ_myotubes_OG10 | 21503 | FTMS; HCD | 77.06 | 725.9 | Zfp11      |

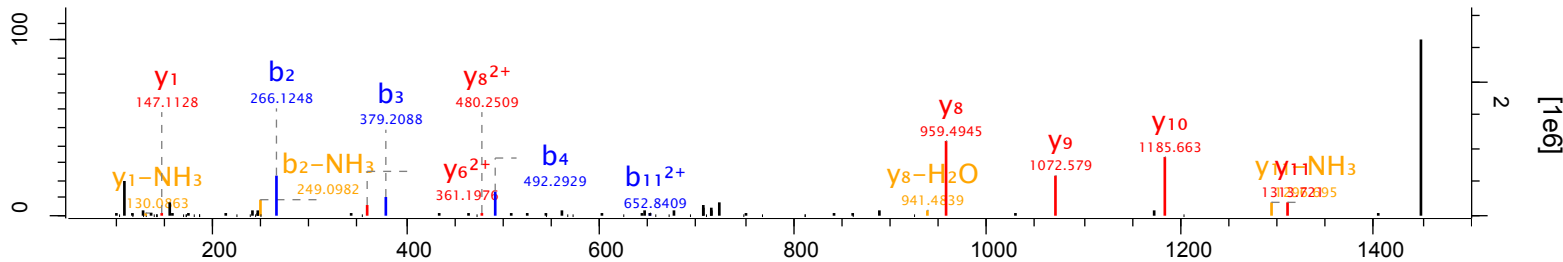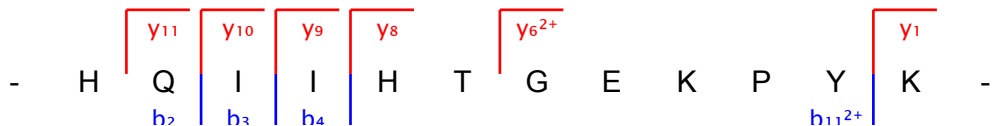

| Raw file                                  | Scan  | Method    | Score  | m/z    | Gene names |
|-------------------------------------------|-------|-----------|--------|--------|------------|
| 20121213_EXQ1_AtDe_50CM_LFQ_myotubes_OG10 | 24446 | FTMS; HCD | 120.87 | 673.35 | Gltscr1l   |

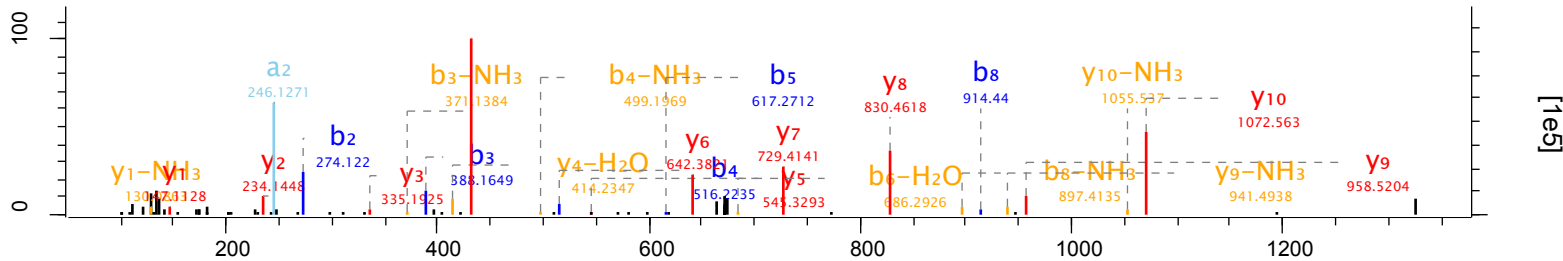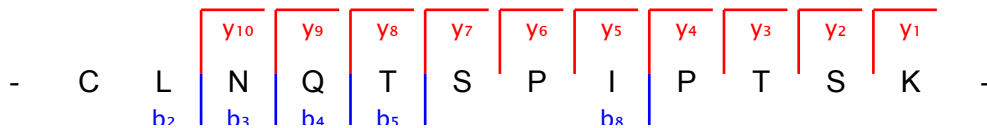



| Raw file                                  | Scan  | Method    | Score | m/z    | Gene names |
|-------------------------------------------|-------|-----------|-------|--------|------------|
| 20121213_EXQ1_AtDe_50CM_LFQ_myotubes_OG10 | 26495 | FTMS; HCD | 73.95 | 616.32 | Ifi44      |

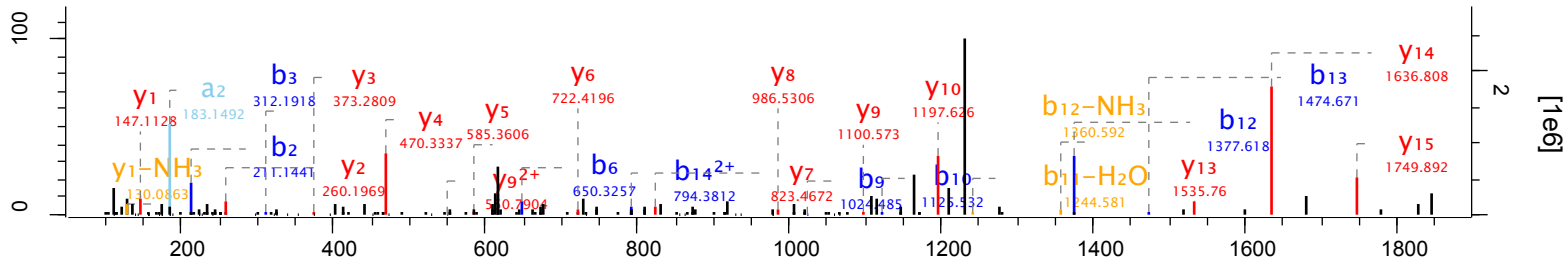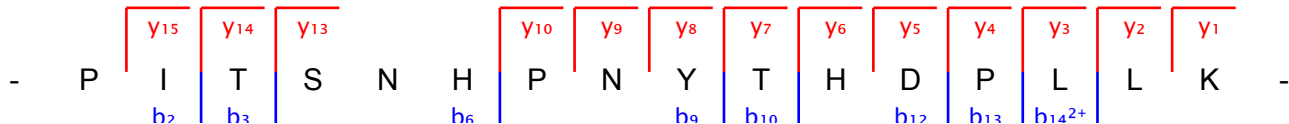

| Raw file                                  | Scan  | Method    | Score | m/z    | Gene names |
|-------------------------------------------|-------|-----------|-------|--------|------------|
| 20121213_EXQ1_AtDe_50CM_LFQ_myotubes_OG10 | 31625 | FTMS; HCD | 108.9 | 587.84 | Syngn2     |

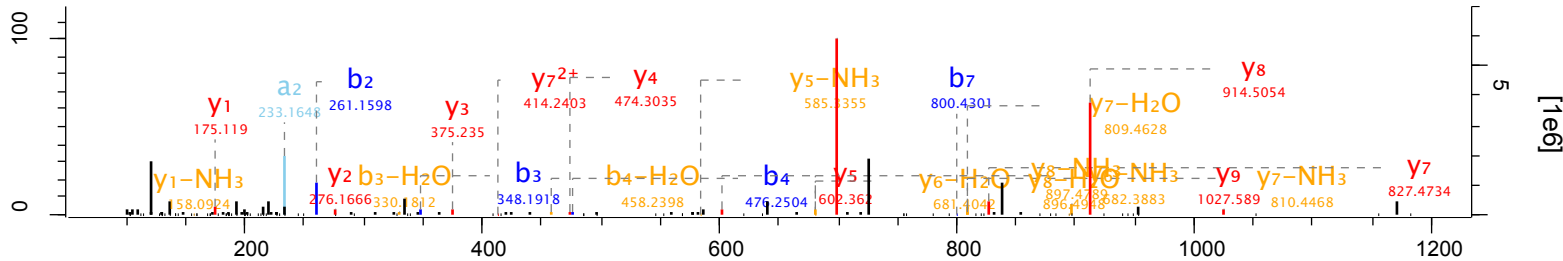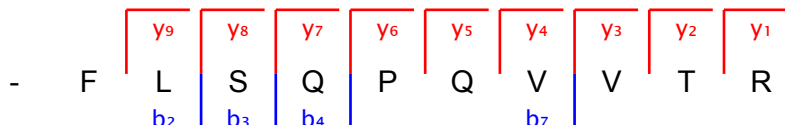

| Raw file                                  | Scan  | Method    | Score | m/z    | Gene names |
|-------------------------------------------|-------|-----------|-------|--------|------------|
| 20121213_EXQ1_AtDe_50CM_LFQ_myotubes_OG10 | 49672 | FTMS; HCD | 59.35 | 483.29 | Plch1      |

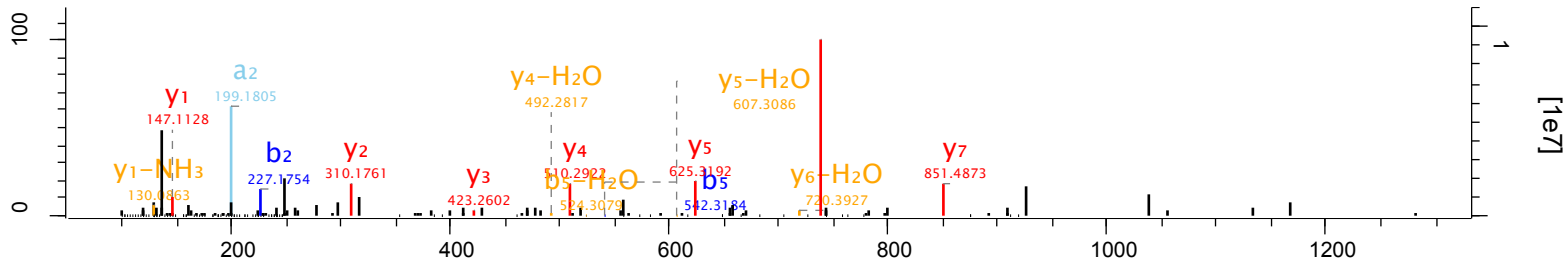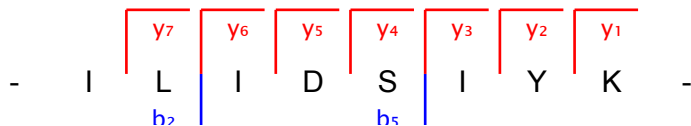

| Raw file                                  | Scan  | Method    | Score | m/z    | Gene names |
|-------------------------------------------|-------|-----------|-------|--------|------------|
| 20121213_EXQ1_AtDe_50CM_LFQ_myotubes_OG10 | 50722 | FTMS; HCD | 77.22 | 587.67 | Krtcap2    |

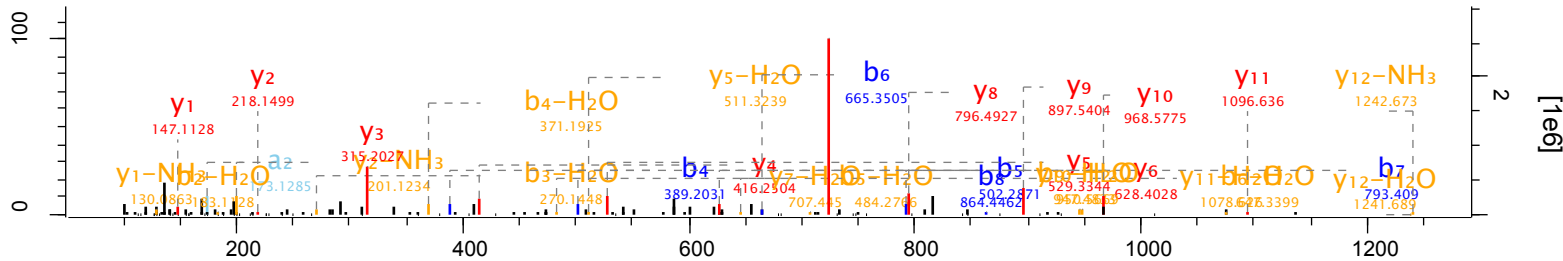

- I S S T L Y Q A T A P V L T P A K -  
 a<sub>2</sub> | b<sub>4</sub> | b<sub>5</sub> | b<sub>6</sub> | b<sub>7</sub> | b<sub>8</sub>

y<sub>11</sub> | y<sub>10</sub> | y<sub>9</sub> | y<sub>8</sub> | y<sub>7</sub> | y<sub>6</sub> | y<sub>5</sub> | y<sub>4</sub> | y<sub>3</sub> | y<sub>2</sub> | y<sub>1</sub>

| Raw file                                  | Scan  | Method    | Score | m/z    | Gene names |
|-------------------------------------------|-------|-----------|-------|--------|------------|
| 20121213_EXQ1_AtDe_50CM_LFQ_myotubes_OG10 | 52099 | FTMS; HCD | 69.72 | 538.83 | Nusap1     |

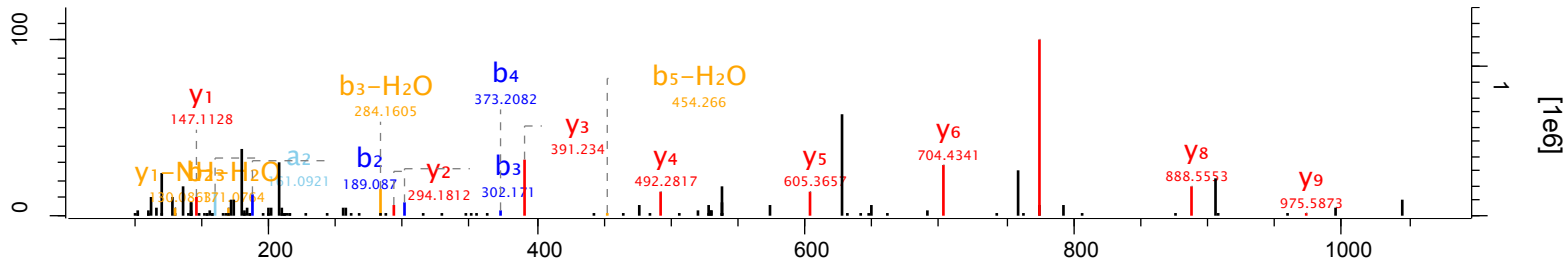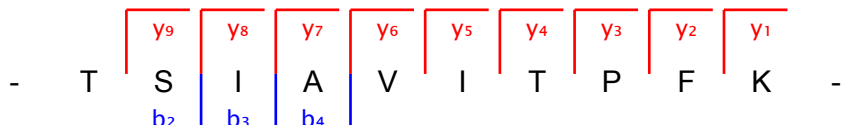

| Raw file                                  | Scan  | Method    | Score | m/z    | Gene names |
|-------------------------------------------|-------|-----------|-------|--------|------------|
| 20121213_EXQ1_AtDe_50CM_LFQ_myotubes_OG10 | 58757 | FTMS; HCD | 85.49 | 848.95 | Mea1       |

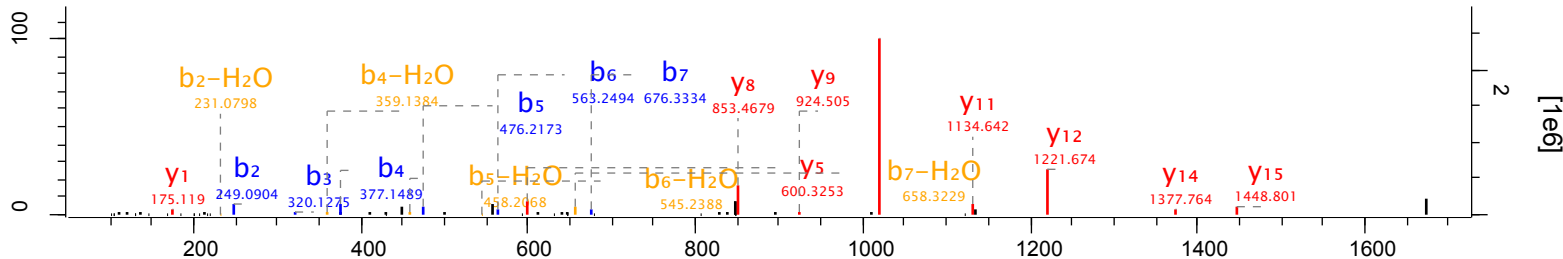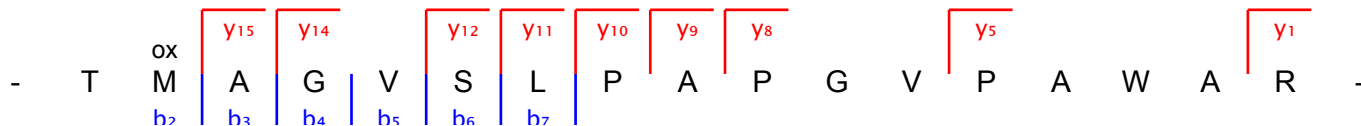

| Raw file                                  | Scan  | Method    | Score | m/z    | Gene names |
|-------------------------------------------|-------|-----------|-------|--------|------------|
| 20121213_EXQ1_AtDe_50CM_LFQ_myotubes_OG10 | 61606 | FTMS; HCD | 78.33 | 813.46 | Plac8      |

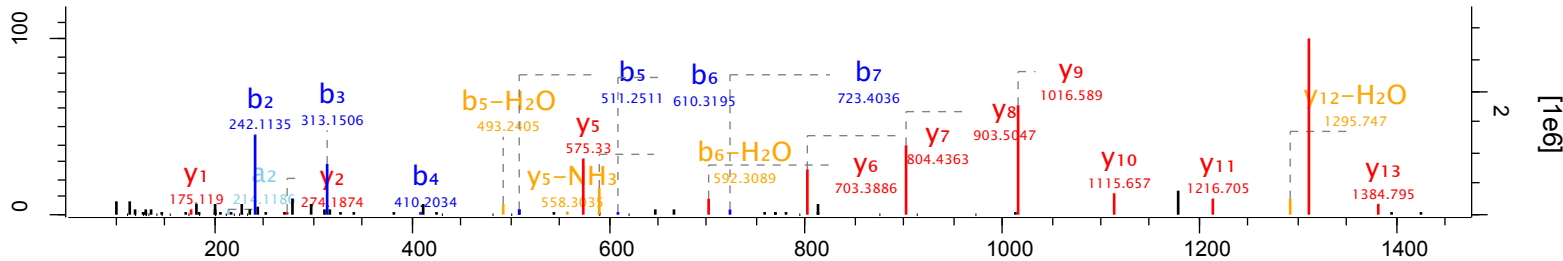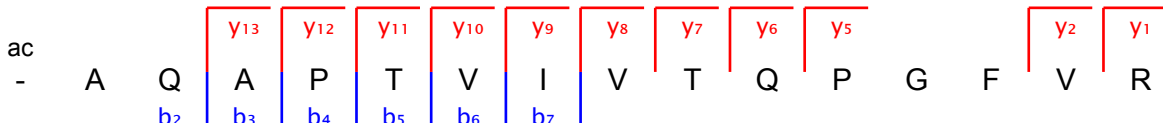

| Raw file                                  | Scan  | Method    | Score | m/z    | Gene names |
|-------------------------------------------|-------|-----------|-------|--------|------------|
| 20121213_EXQ1_AtDe_50CM_LFQ_myotubes_OG10 | 63002 | FTMS; HCD | 40.94 | 804.98 | Gcnt2      |

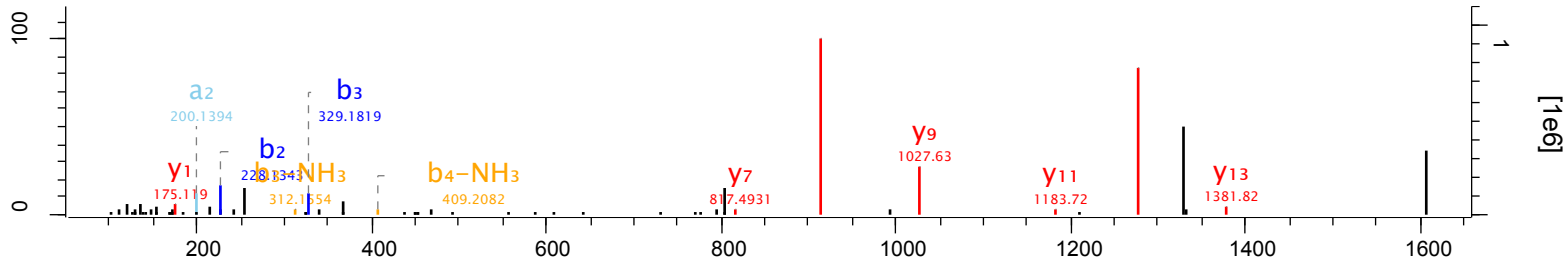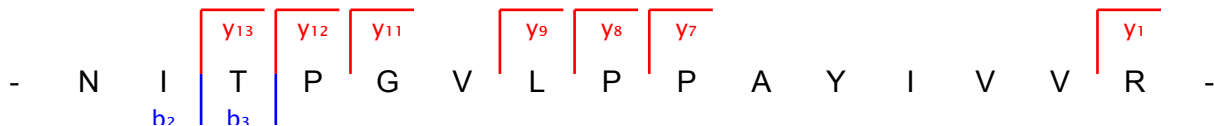



| Raw file                                  | Scan  | Method    | Score | m/z    | Gene names   |
|-------------------------------------------|-------|-----------|-------|--------|--------------|
| 20121213_EXQ1_AtDe_50CM_LFQ_myotubes_OG10 | 63439 | FTMS; HCD | 85.27 | 736.39 | Socs2;Gm9847 |

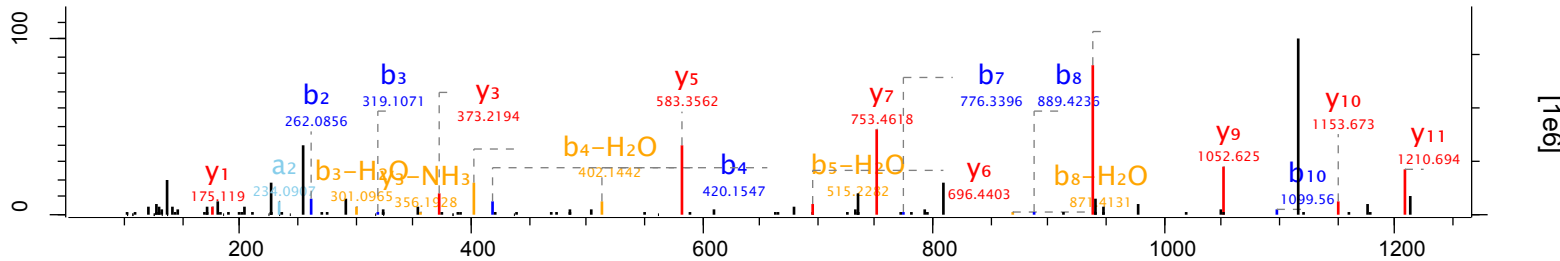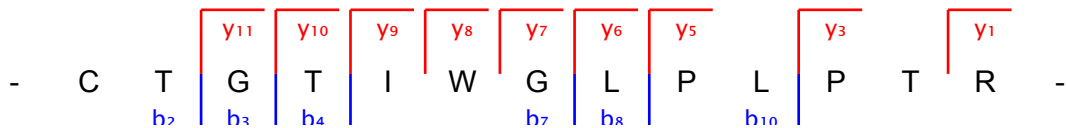

| Raw file                                  | Scan  | Method    | Score  | m/z | Gene names |
|-------------------------------------------|-------|-----------|--------|-----|------------|
| 20121213_EXQ1_AtDe_50CM_LFQ_myotubes_OG10 | 68748 | FTMS; HCD | 133.48 | 853 | Gemin7     |

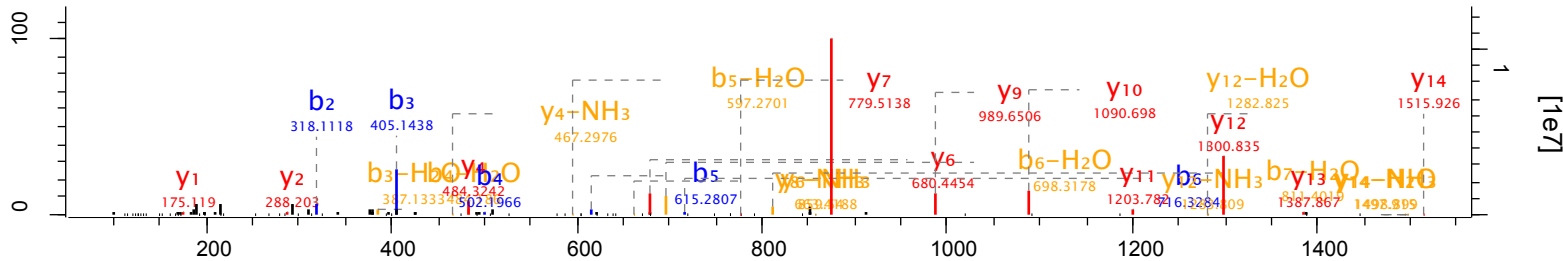

| ac | ox | y14 | y13 | y12 | y11 | y10 | y9 | y8 | y7 | y6 | y4 | y2 | y1 |
|----|----|-----|-----|-----|-----|-----|----|----|----|----|----|----|----|
| -  | M  | Q   | S   | P   | L   | T   | I  | P  | V  | P  | V  | L  | R  |
|    |    | b2  | b3  | b4  | b5  | b6  |    |    |    |    |    |    |    |

| Raw file                                  | Scan | Method    | Score  | m/z    | Gene names |
|-------------------------------------------|------|-----------|--------|--------|------------|
| 20121213_EXQ1_AtDe_50CM_LFQ_myotubes_OG10 | 9977 | FTMS; HCD | 101.53 | 652.79 | Gpr39      |

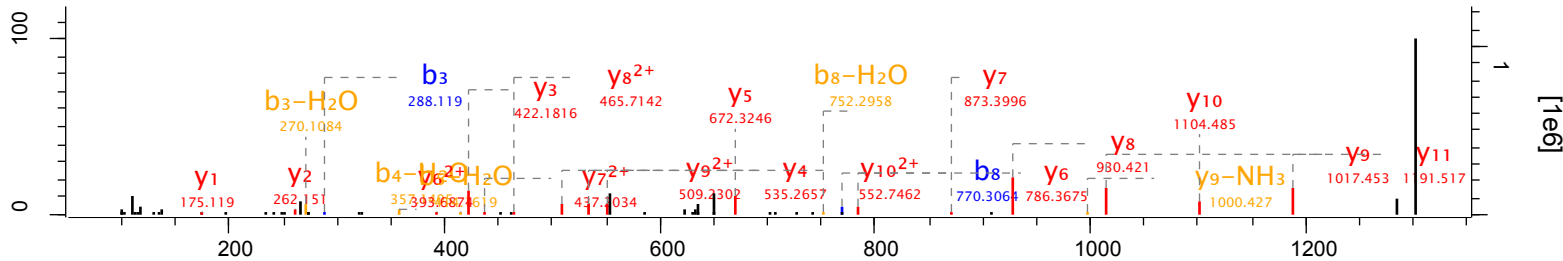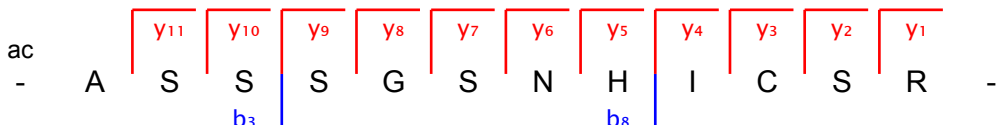

| Raw file                                  | Scan  | Method    | Score | m/z    | Gene names |
|-------------------------------------------|-------|-----------|-------|--------|------------|
| 20121213_EXQ1_AtDe_50CM_LFQ_myotubes_OG11 | 26408 | FTMS; HCD | 68.58 | 584.97 | Hspg2      |

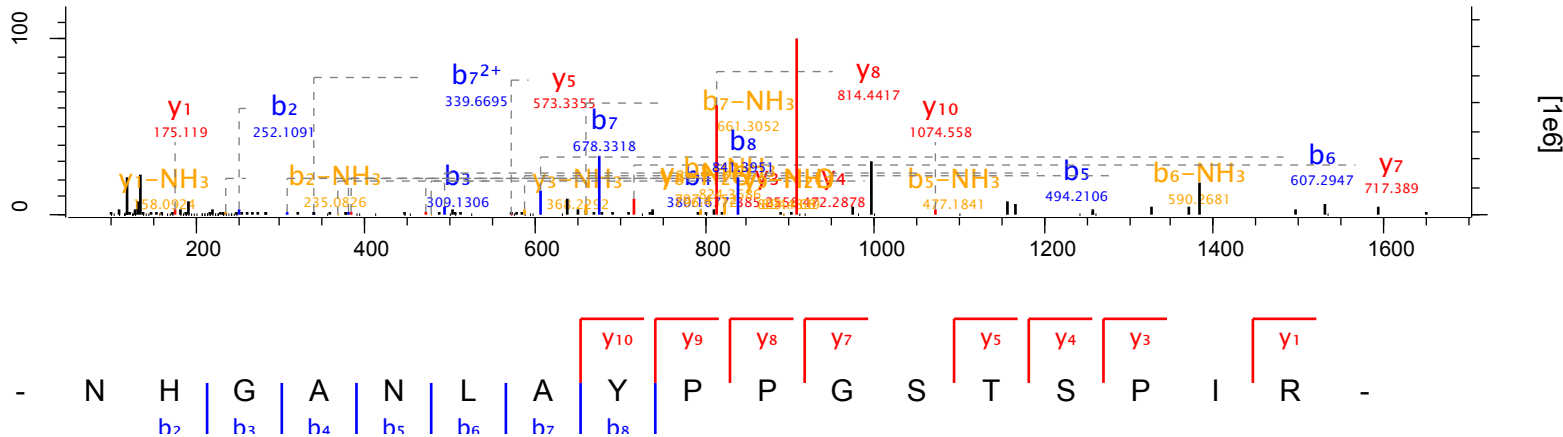

| Raw file                                  | Scan  | Method    | Score | m/z   | Gene names |
|-------------------------------------------|-------|-----------|-------|-------|------------|
| 20121213_EXQ1_AtDe_50CM_LFQ_myotubes_OG11 | 27205 | FTMS; HCD | 80.71 | 520.3 | Eya2       |

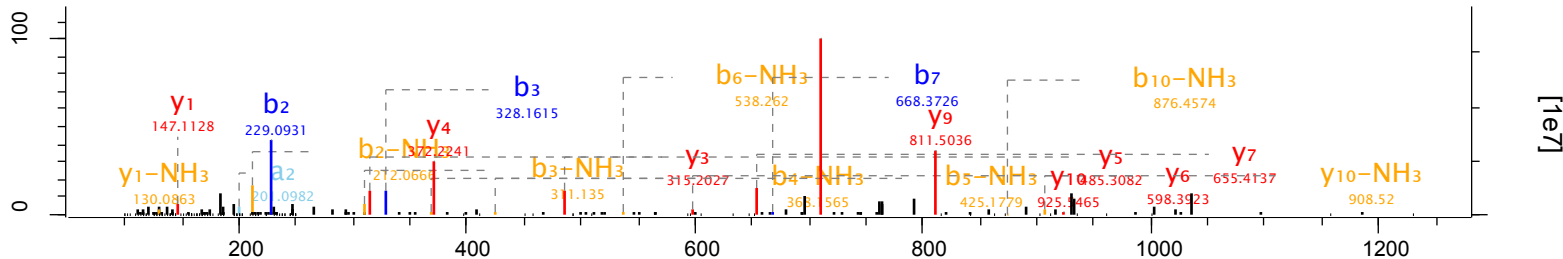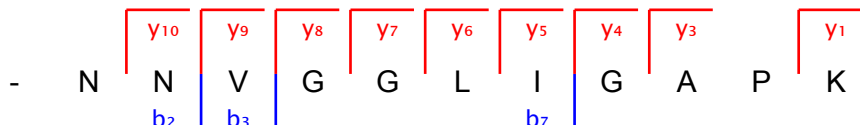

| Raw file                                  | Scan  | Method    | Score | m/z    | Gene names |
|-------------------------------------------|-------|-----------|-------|--------|------------|
| 20121213_EXQ1_AtDe_50CM_LFQ_myotubes_OG11 | 29715 | FTMS; HCD | 99.53 | 587.84 | Syngn2     |

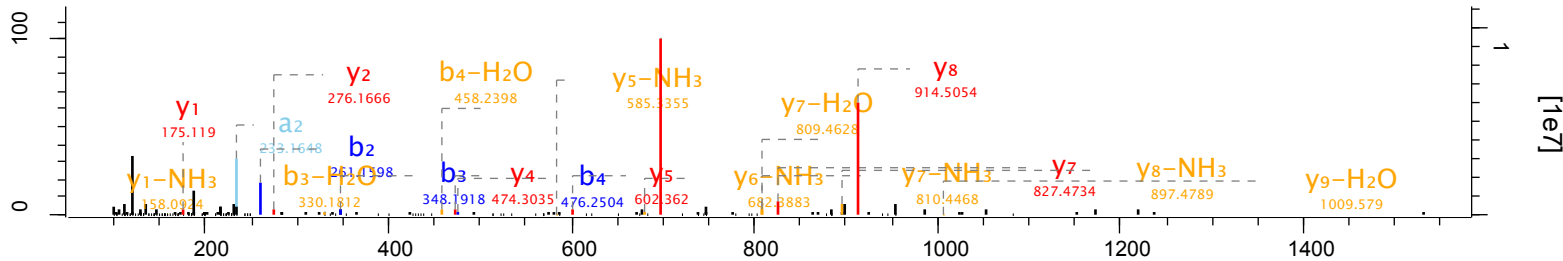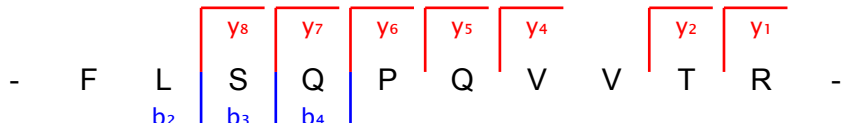

| Raw file                                  | Scan  | Method    | Score | m/z     | Gene names |
|-------------------------------------------|-------|-----------|-------|---------|------------|
| 20121213_EXQ1_AtDe_50CM_LFQ_myotubes_OG11 | 40495 | FTMS; HCD | 71.85 | 1075.01 | Unc50      |

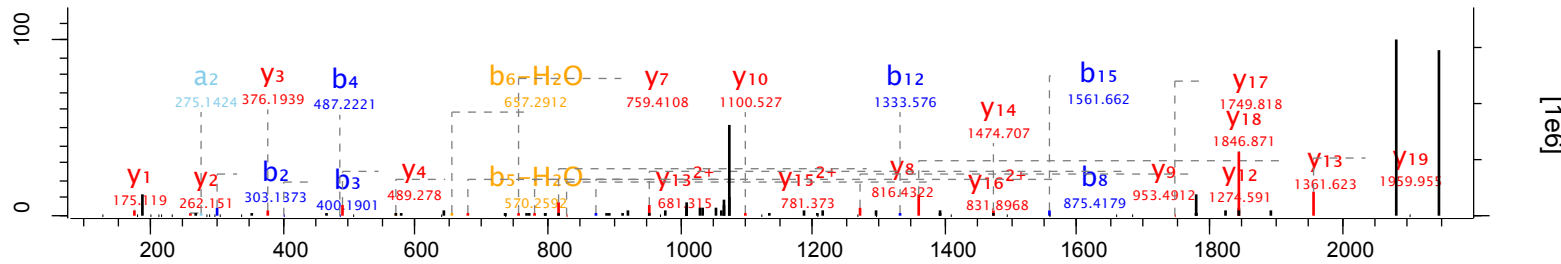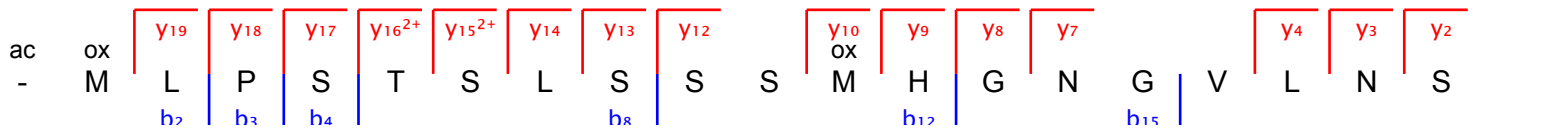

| Raw file                                  | Scan  | Method    | Score | m/z    | Gene names |
|-------------------------------------------|-------|-----------|-------|--------|------------|
| 20121213_EXQ1_AtDe_50CM_LFQ_myotubes_OG11 | 40516 | FTMS; HCD | 74.03 | 717.01 | Unc50      |

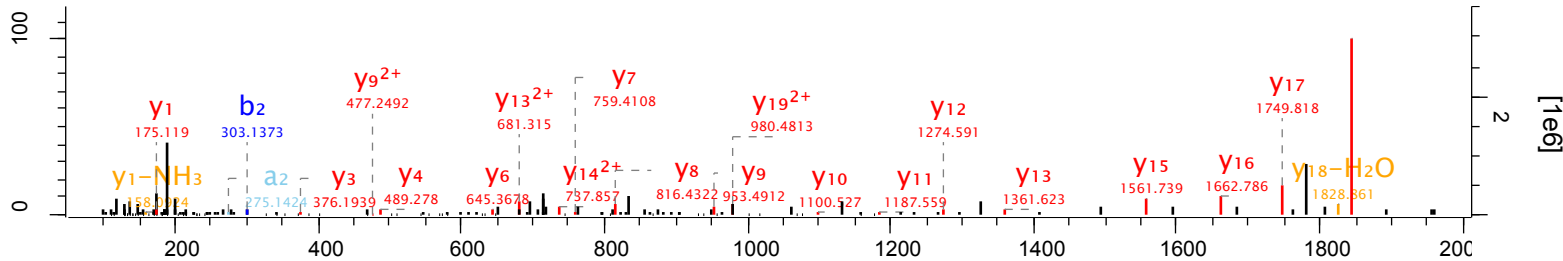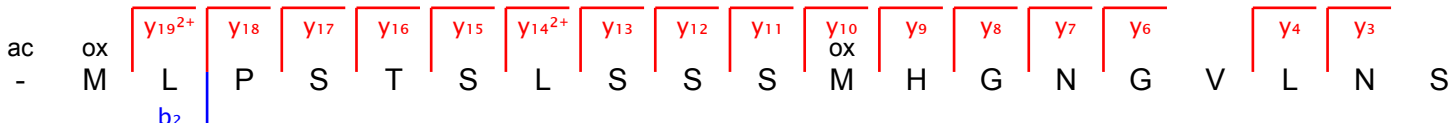



| Raw file                                  | Scan  | Method    | Score | m/z    | Gene names |
|-------------------------------------------|-------|-----------|-------|--------|------------|
| 20121213_EXQ1_AtDe_50CM_LFQ_myotubes_OG11 | 42242 | FTMS; HCD | 96.25 | 874.94 | Bri3       |

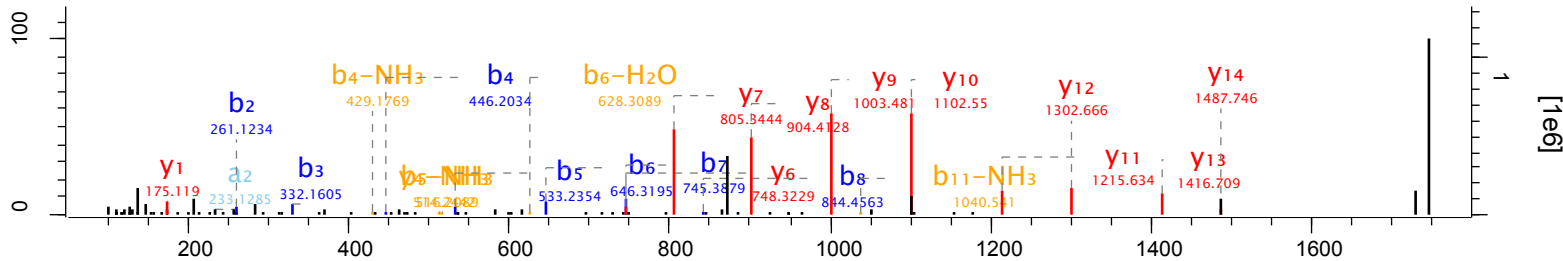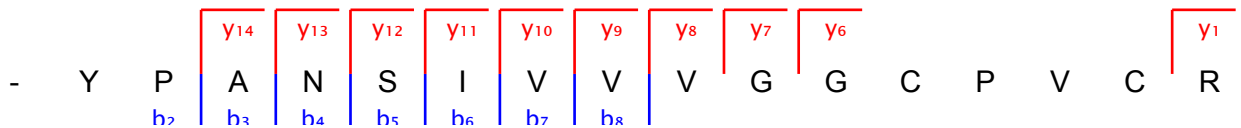

| Raw file                                  | Scan  | Method    | Score | m/z    | Gene names |
|-------------------------------------------|-------|-----------|-------|--------|------------|
| 20121213_EXQ1_AtDe_50CM_LFQ_myotubes_OG11 | 42249 | FTMS; HCD | 98.28 | 574.99 | Tanc2      |

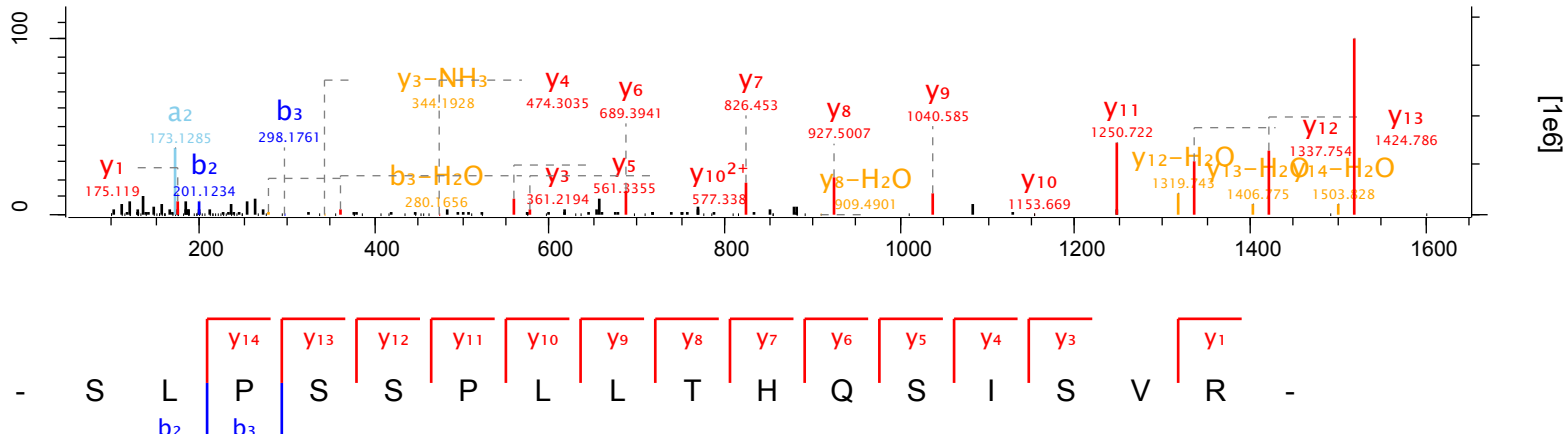

| Raw file                                  | Scan  | Method    | Score | m/z    | Gene names |
|-------------------------------------------|-------|-----------|-------|--------|------------|
| 20121213_EXQ1_AtDe_50CM_LFQ_myotubes_OG11 | 46019 | FTMS; HCD | 52.17 | 949.53 | Ska3       |

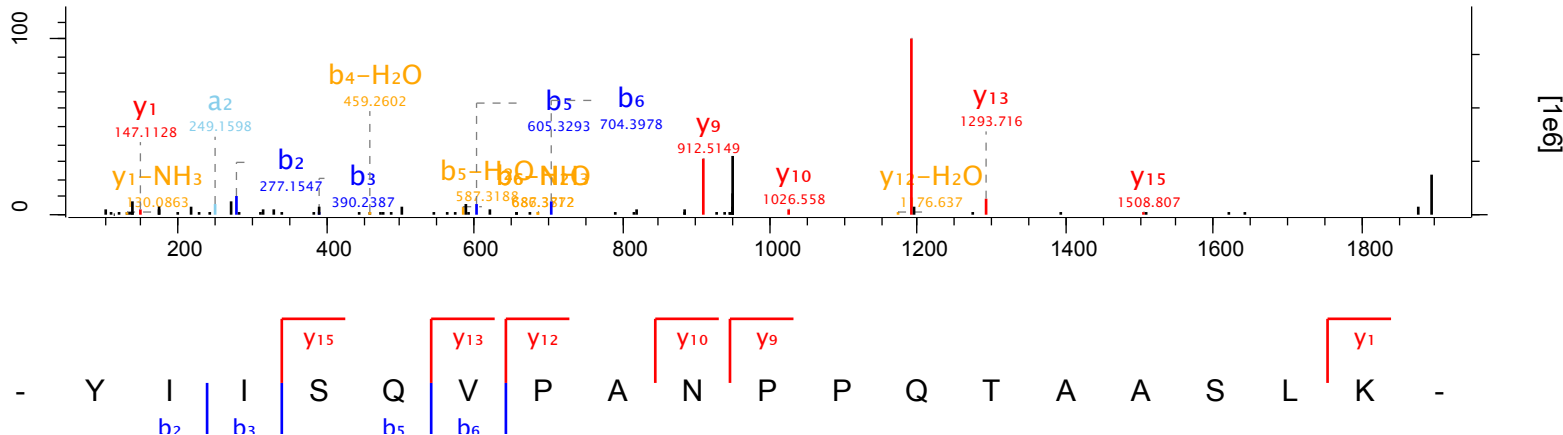

| Raw file                                  | Scan  | Method    | Score | m/z    | Gene names |
|-------------------------------------------|-------|-----------|-------|--------|------------|
| 20121213_EXQ1_AtDe_50CM_LFQ_myotubes_OG11 | 47730 | FTMS; HCD | 74.7  | 472.61 | Cables2    |

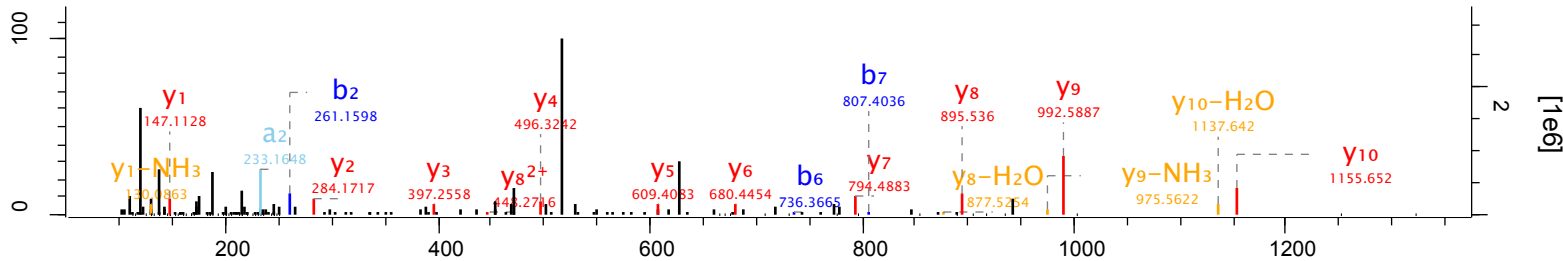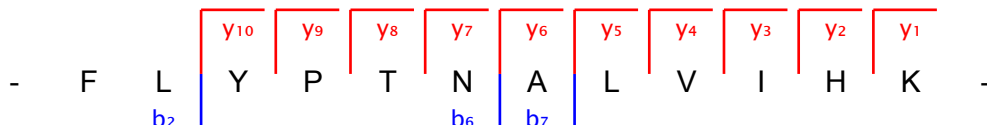

| Raw file                                  | Scan  | Method    | Score | m/z     | Gene names |
|-------------------------------------------|-------|-----------|-------|---------|------------|
| 20121213_EXQ1_AtDe_50CM_LFQ_myotubes_OG11 | 48315 | FTMS; HCD | 81.88 | 1067.51 | Unc50      |

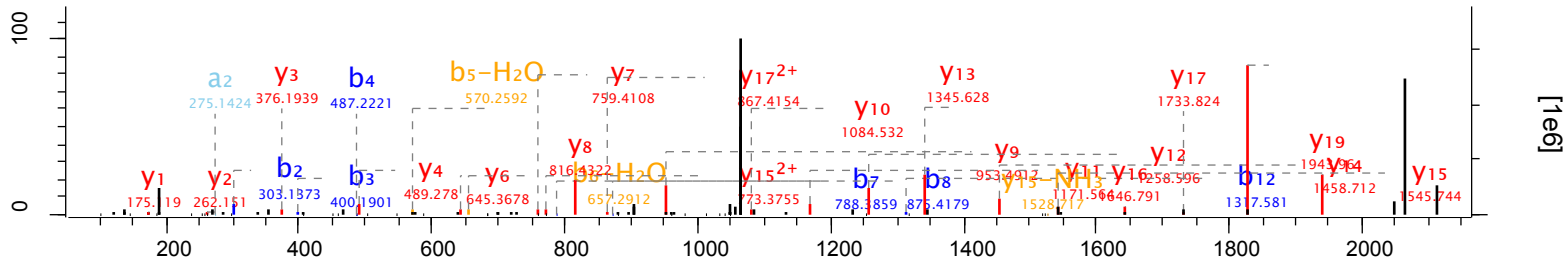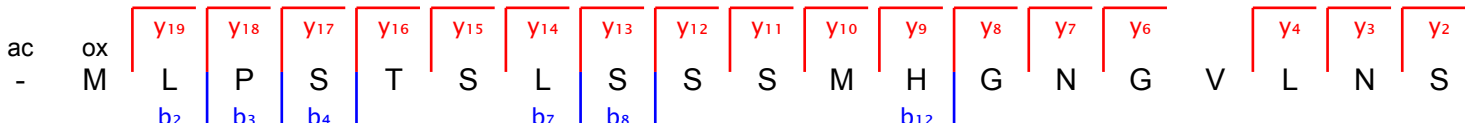

| Raw file                                  | Scan  | Method    | Score | m/z    | Gene names |
|-------------------------------------------|-------|-----------|-------|--------|------------|
| 20121213_EXQ1_AtDe_50CM_LFQ_myotubes_OG11 | 48377 | FTMS; HCD | 69.77 | 711.68 | Unc50      |

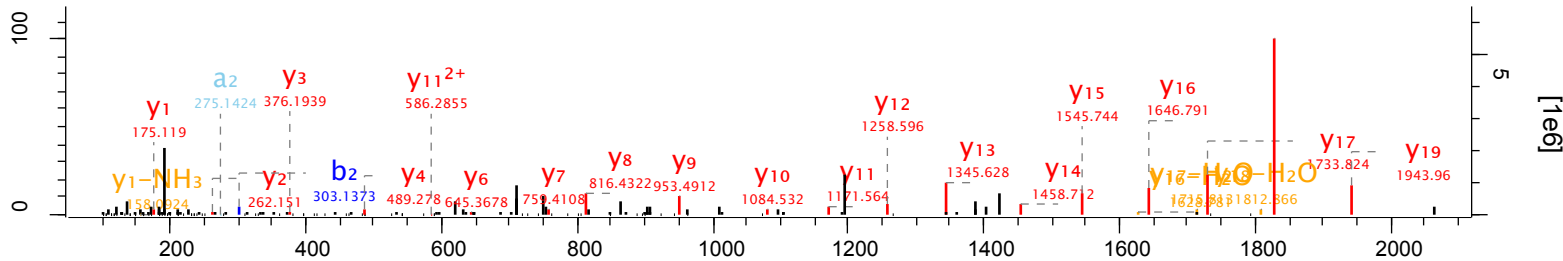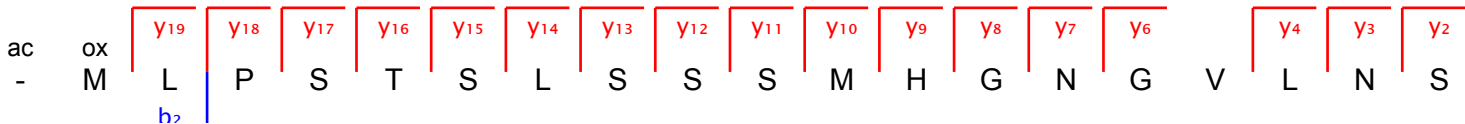

| Raw file                                  | Scan  | Method    | Score  | m/z   | Gene names |
|-------------------------------------------|-------|-----------|--------|-------|------------|
| 20121213_EXQ1_AtDe_50CM_LFQ_myotubes_OG11 | 49291 | FTMS; HCD | 131.18 | 881.5 | Krtcap2    |

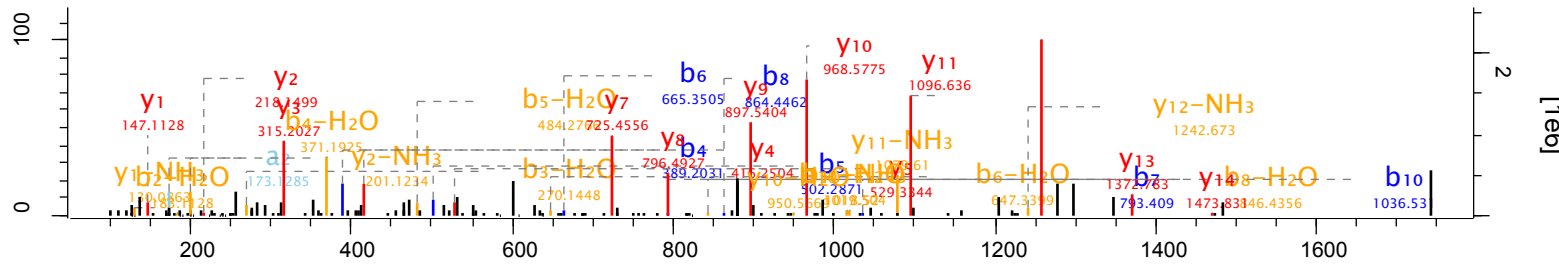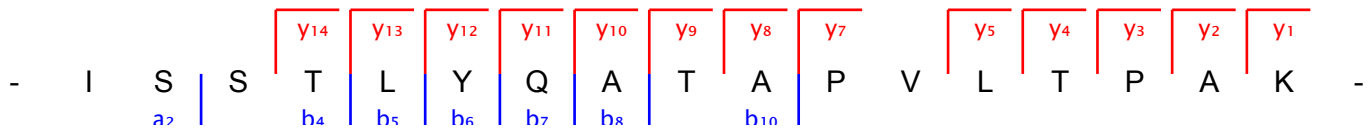

| Raw file                                  | Scan  | Method    | Score | m/z    | Gene names |
|-------------------------------------------|-------|-----------|-------|--------|------------|
| 20121213_EXQ1_AtDe_50CM_LFQ_myotubes_OG11 | 49305 | FTMS; HCD | 77.22 | 587.67 | Krtcap2    |

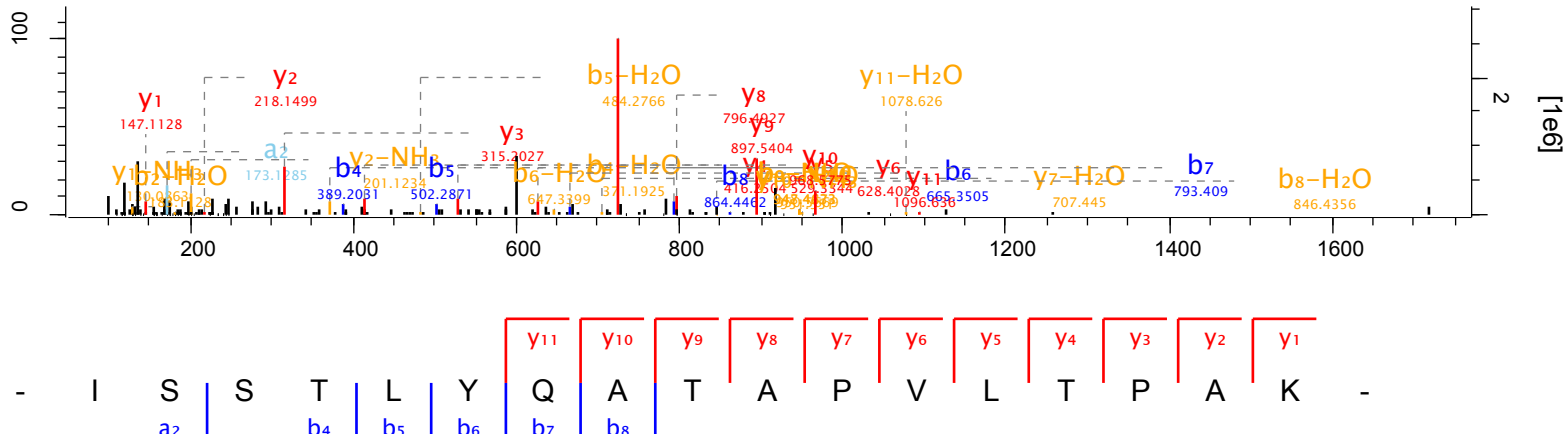



| Raw file                                  | Scan  | Method    | Score  | m/z    | Gene names |
|-------------------------------------------|-------|-----------|--------|--------|------------|
| 20121213_EXQ1_AtDe_50CM_LFQ_myotubes_OG11 | 50119 | FTMS; HCD | 125.74 | 538.82 | Nusap1     |

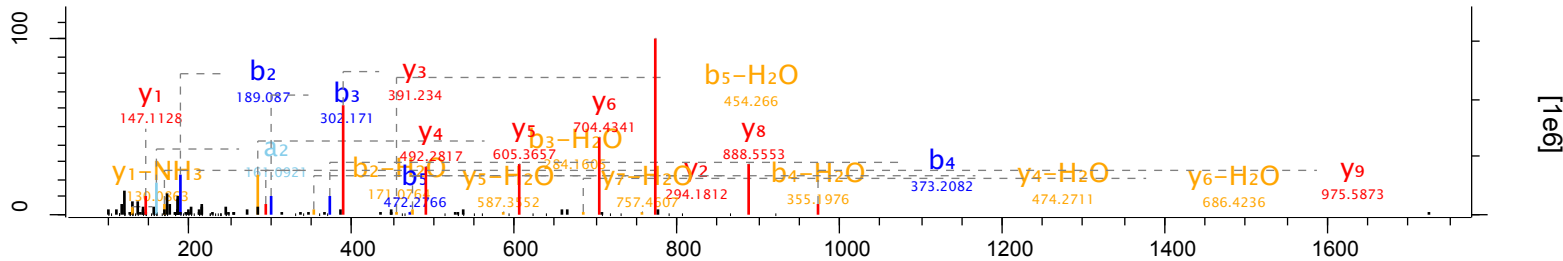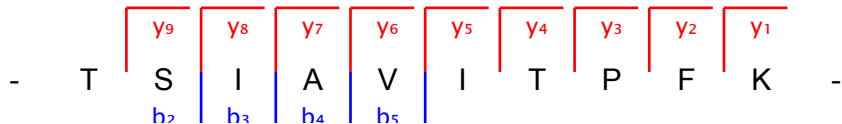

| Raw file                                  | Scan  | Method    | Score | m/z    | Gene names |
|-------------------------------------------|-------|-----------|-------|--------|------------|
| 20121213_EXQ1_AtDe_50CM_LFQ_myotubes_OG11 | 55969 | FTMS; HCD | 66.81 | 850.44 | Usp37      |

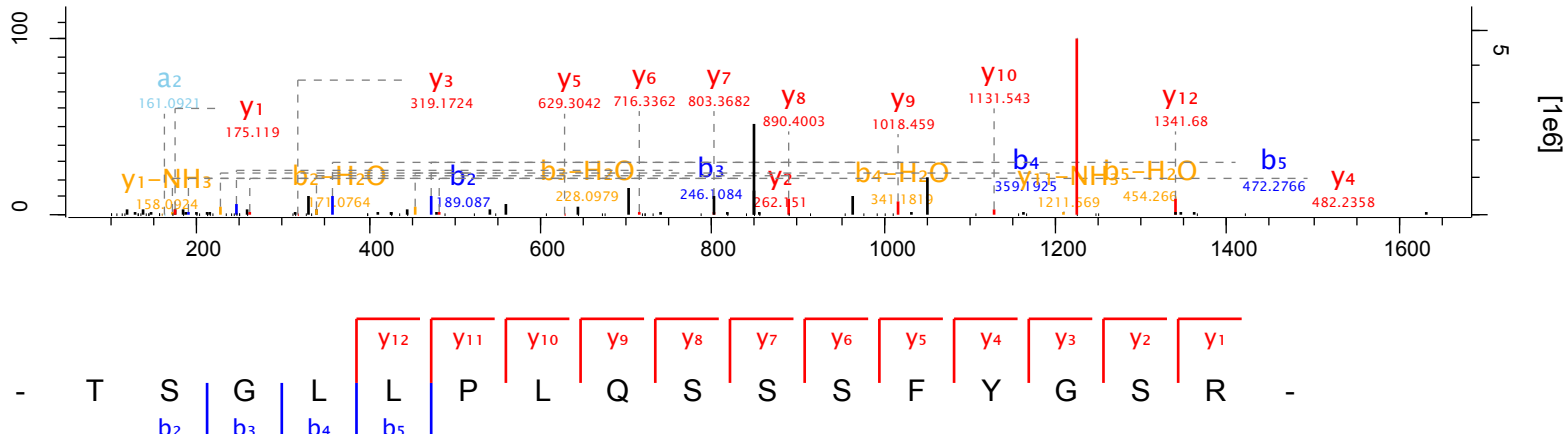

| Raw file                                  | Scan  | Method    | Score  | m/z    | Gene names |
|-------------------------------------------|-------|-----------|--------|--------|------------|
| 20121213_EXQ1_AtDe_50CM_LFQ_myotubes_OG11 | 57212 | FTMS; HCD | 127.87 | 673.87 | Tp53i13    |

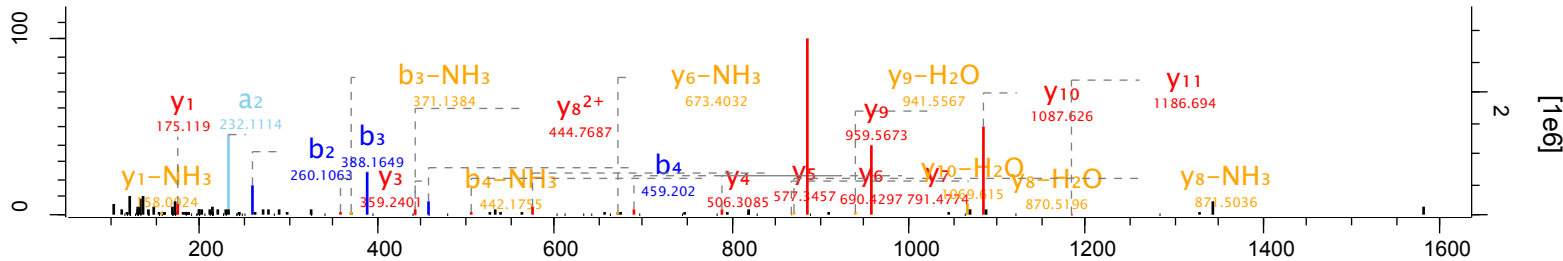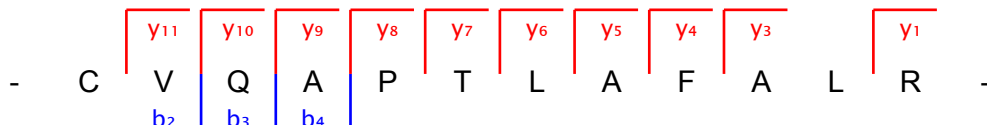

| Raw file                                  | Scan  | Method    | Score | m/z    | Gene names |
|-------------------------------------------|-------|-----------|-------|--------|------------|
| 20121213_EXQ1_AtDe_50CM_LFQ_myotubes_OG11 | 57853 | FTMS; HCD | 89.36 | 849.45 | Mea1       |

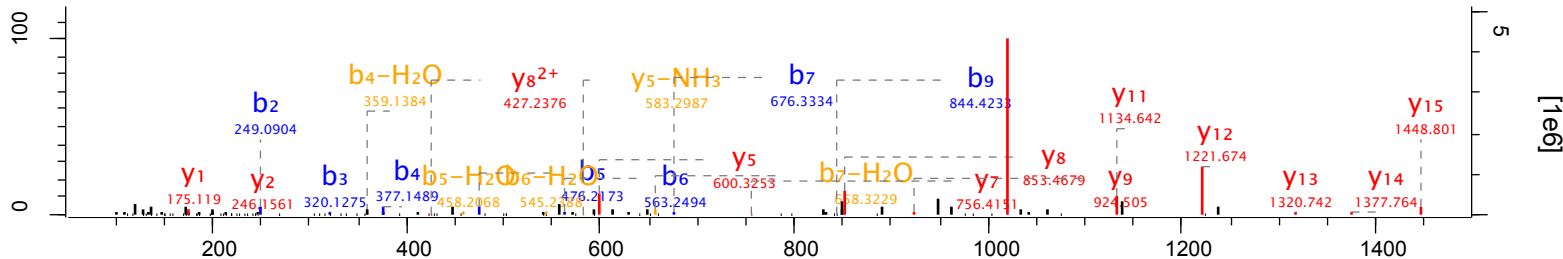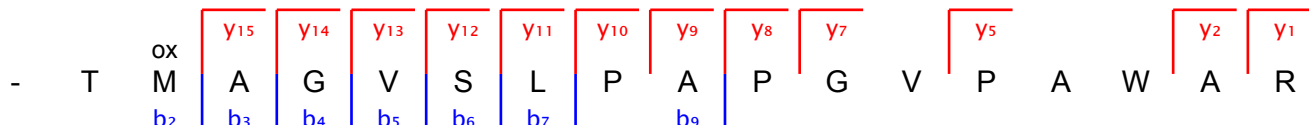

| Raw file                                  | Scan  | Method    | Score  | m/z    | Gene names |
|-------------------------------------------|-------|-----------|--------|--------|------------|
| 20121213_EXQ1_AtDe_50CM_LFQ_myotubes_OG11 | 57919 | FTMS; HCD | 103.88 | 566.64 | Mea1       |

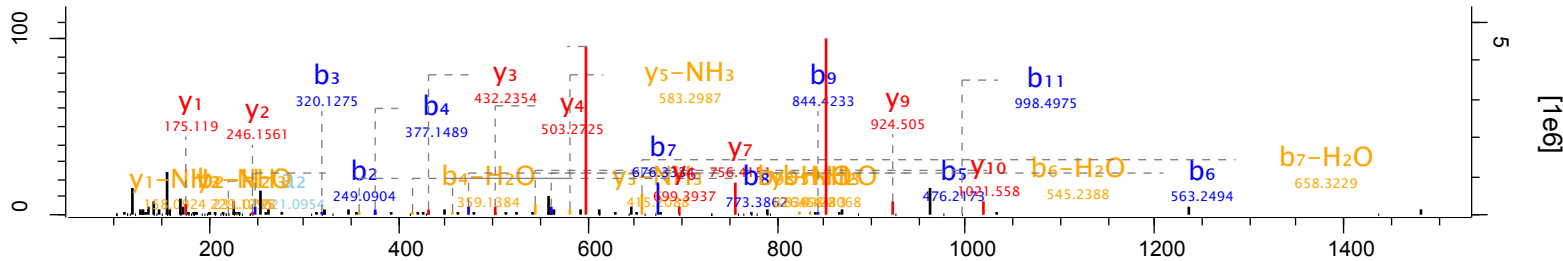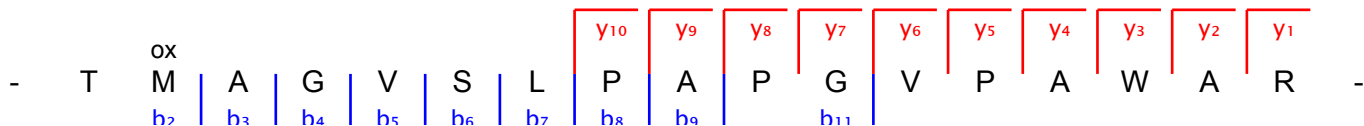

| Raw file                                  | Scan  | Method    | Score  | m/z    | Gene names |
|-------------------------------------------|-------|-----------|--------|--------|------------|
| 20121213_EXQ1_AtDe_50CM_LFQ_myotubes_OG11 | 58837 | FTMS; HCD | 113.01 | 684.32 | Ldlrad3    |

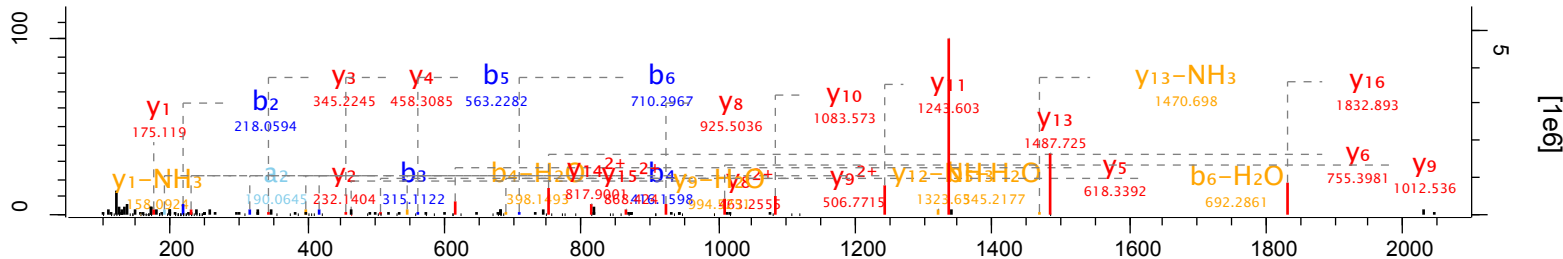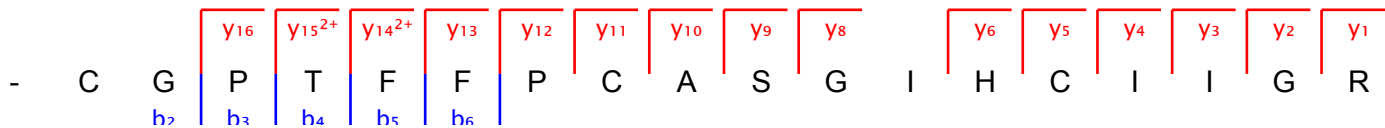

| Raw file                                  | Scan  | Method    | Score | m/z     | Gene names |
|-------------------------------------------|-------|-----------|-------|---------|------------|
| 20121213_EXQ1_AtDe_50CM_LFQ_myotubes_OG11 | 59110 | FTMS; HCD | 91.34 | 1104.61 | Sp4        |

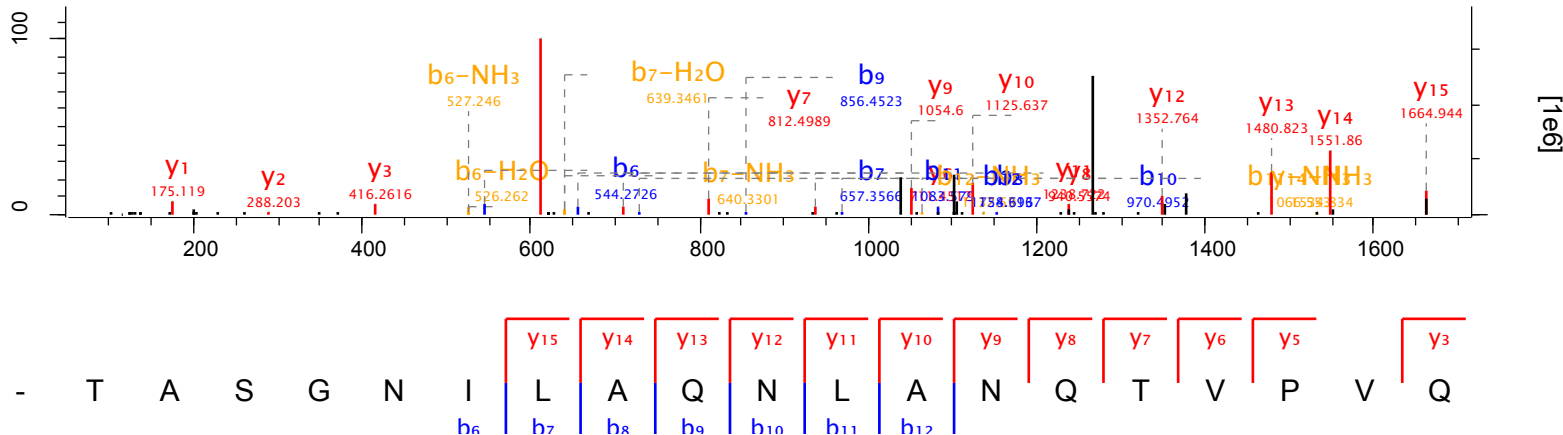

| Raw file                                  | Scan  | Method    | Score  | m/z    | Gene names |
|-------------------------------------------|-------|-----------|--------|--------|------------|
| 20121213_EXQ1_AtDe_50CM_LFQ_myotubes_OG11 | 60216 | FTMS; HCD | 111.27 | 577.33 | Cmtm6      |

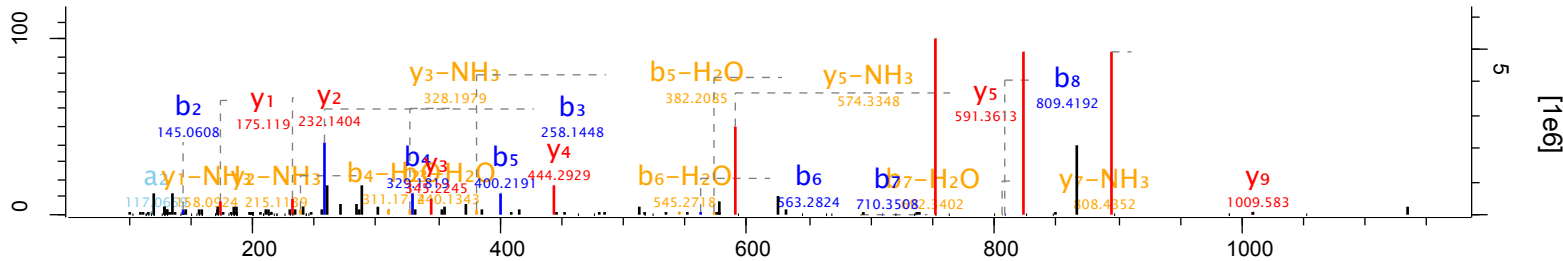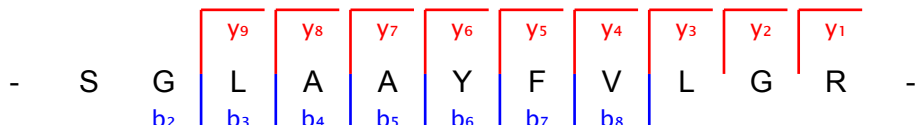



Raw file

20121213\_EXQ1\_AtDe\_50CM\_LFQ\_myotubes\_OG11

Scan

60604

Method

FTMS; HCD

Score

78.34

m/z

615.35

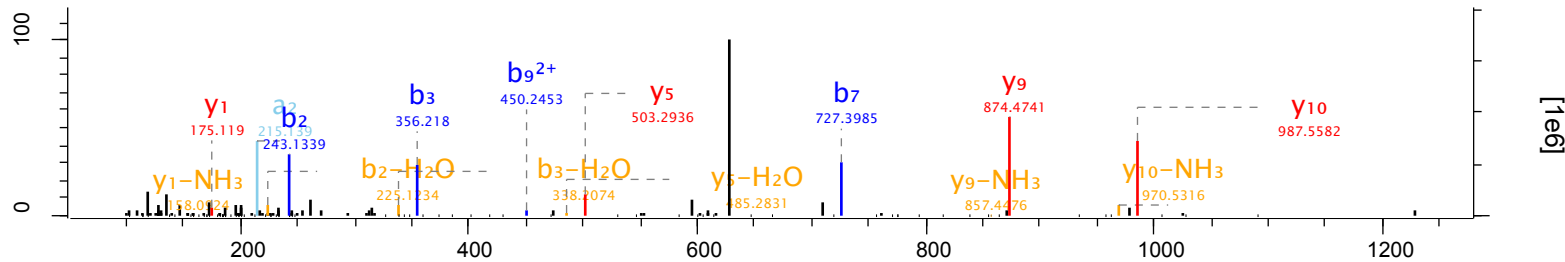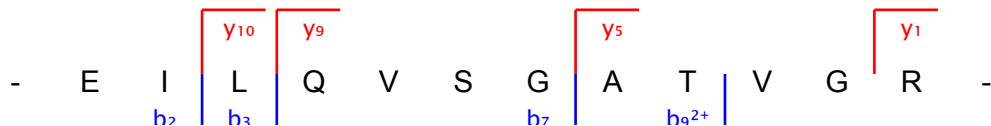

| Raw file                                  | Scan  | Method    | Score | m/z    | Gene names |
|-------------------------------------------|-------|-----------|-------|--------|------------|
| 20121213_EXQ1_AtDe_50CM_LFQ_myotubes_OG11 | 60660 | FTMS; HCD | 77.2  | 716.38 | Traf1      |

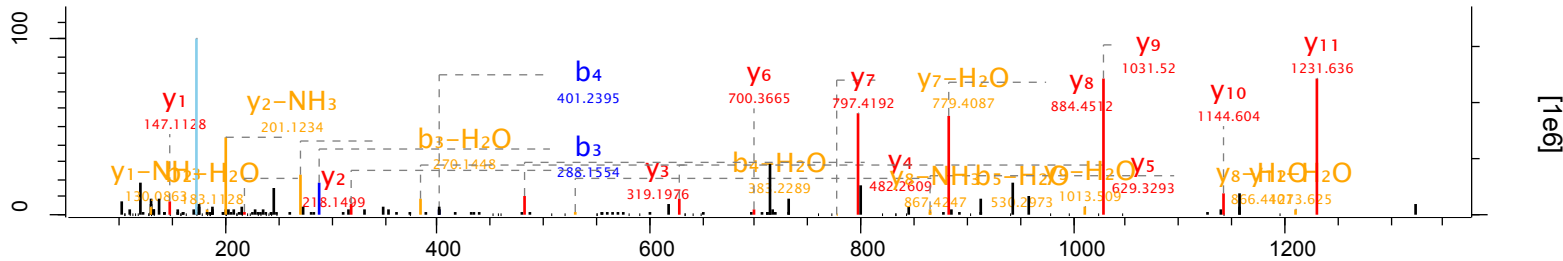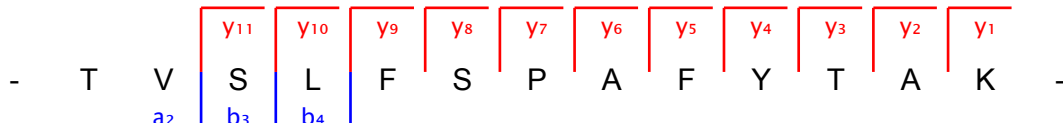

| Raw file                                  | Scan  | Method    | Score  | m/z    | Gene names |
|-------------------------------------------|-------|-----------|--------|--------|------------|
| 20121213_EXQ1_AtDe_50CM_LFQ_myotubes_OG11 | 61089 | FTMS; HCD | 122.33 | 813.96 | Plac8      |

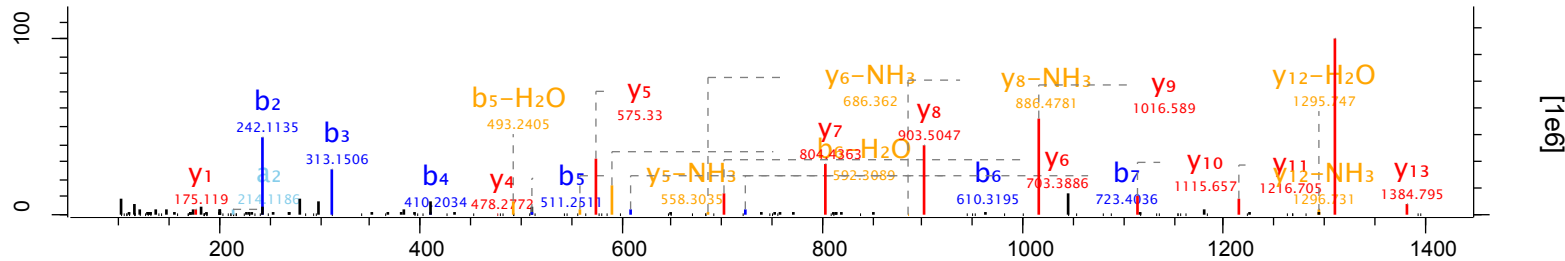

ac

- A Q A P T V I V T Q P G F V R -

h<sub>2</sub> h<sub>3</sub> h<sub>4</sub> h<sub>5</sub> h<sub>6</sub> h<sub>7</sub>

y<sub>13</sub> y<sub>12</sub> y<sub>11</sub> y<sub>10</sub> y<sub>9</sub> y<sub>8</sub> y<sub>7</sub> y<sub>6</sub> y<sub>5</sub> y<sub>4</sub> y<sub>1</sub>

| Raw file                                  | Scan  | Method    | Score | m/z    | Gene names |
|-------------------------------------------|-------|-----------|-------|--------|------------|
| 20121213_EXQ1_AtDe_50CM_LFQ_myotubes_OG11 | 61501 | FTMS; HCD | 86    | 934.51 | Gabra3     |

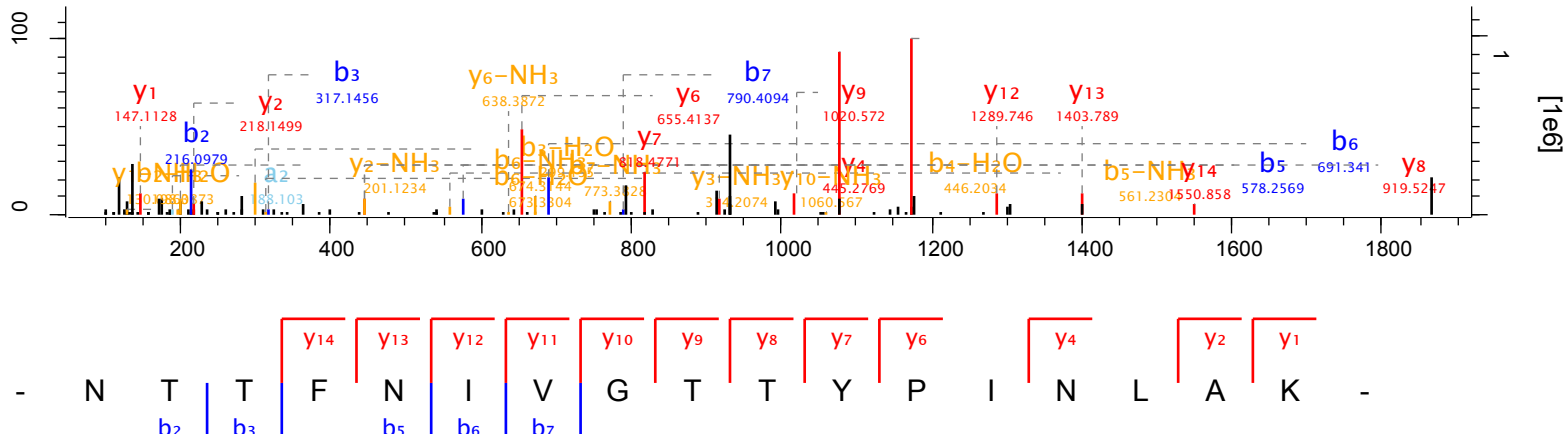

| Raw file                                  | Scan  | Method    | Score | m/z    | Gene names |
|-------------------------------------------|-------|-----------|-------|--------|------------|
| 20121213_EXQ1_AtDe_50CM_LFQ_myotubes_OG11 | 62446 | FTMS; HCD | 70.16 | 805.48 | Gcnt2      |

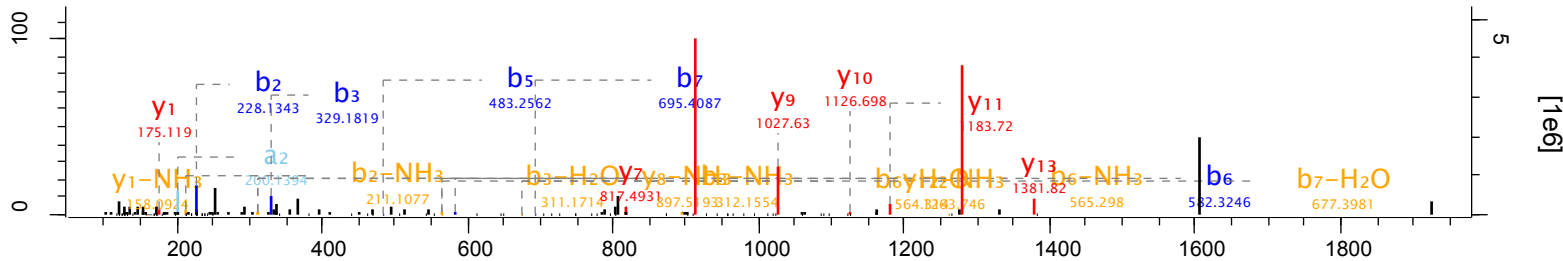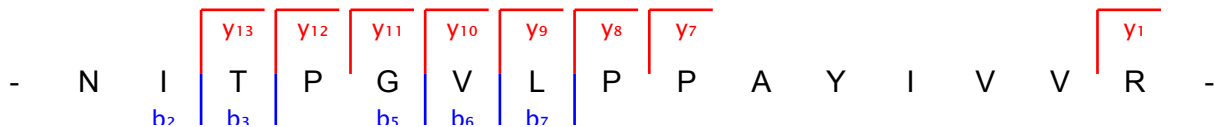

| Raw file                                  | Scan  | Method    | Score  | m/z    | Gene names   |
|-------------------------------------------|-------|-----------|--------|--------|--------------|
| 20121213_EXQ1_AtDe_50CM_LFQ_myotubes_OG11 | 62893 | FTMS; HCD | 116.63 | 736.39 | Socs2;Gm9847 |

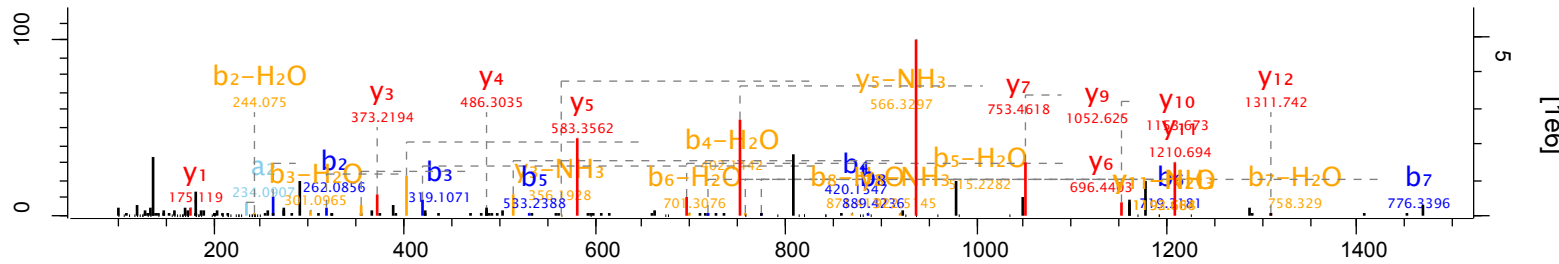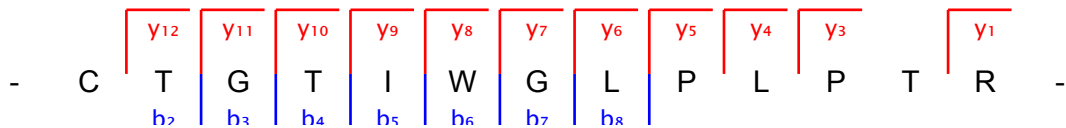

| Raw file                                  | Scan  | Method    | Score | m/z   | Gene names |
|-------------------------------------------|-------|-----------|-------|-------|------------|
| 20121213_EXQ1_AtDe_50CM_LFQ_myotubes_OG11 | 63585 | FTMS; HCD | 68    | 712.4 | C2cd3      |

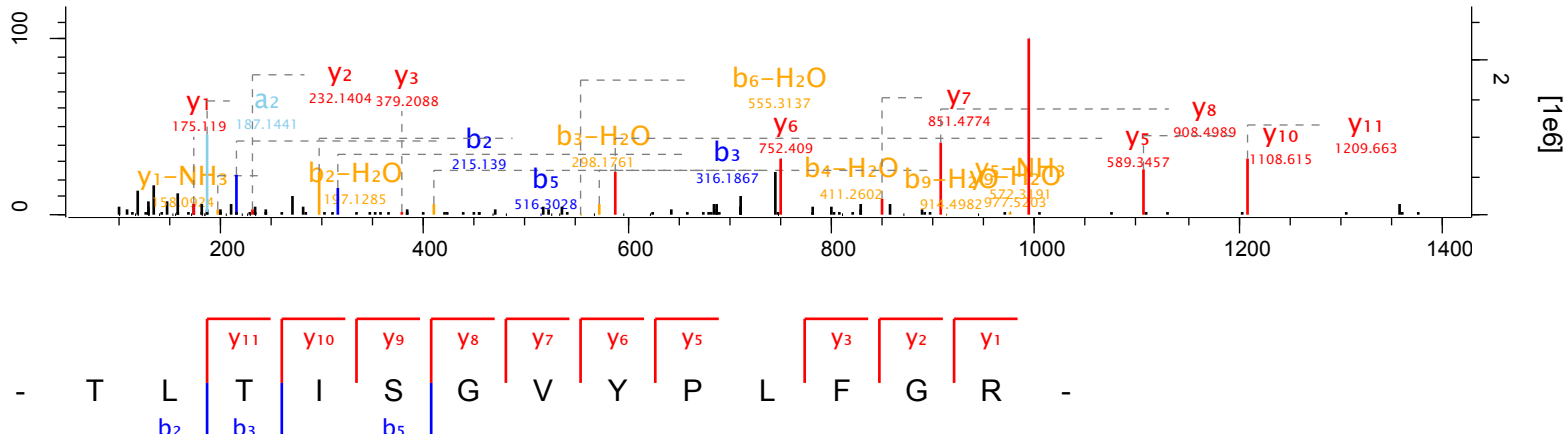

| Raw file                                  | Scan  | Method    | Score | m/z    | Gene names |
|-------------------------------------------|-------|-----------|-------|--------|------------|
| 20121213_EXQ1_AtDe_50CM_LFQ_myotubes_OG11 | 65895 | FTMS; HCD | 95.07 | 840.48 | ELL2       |

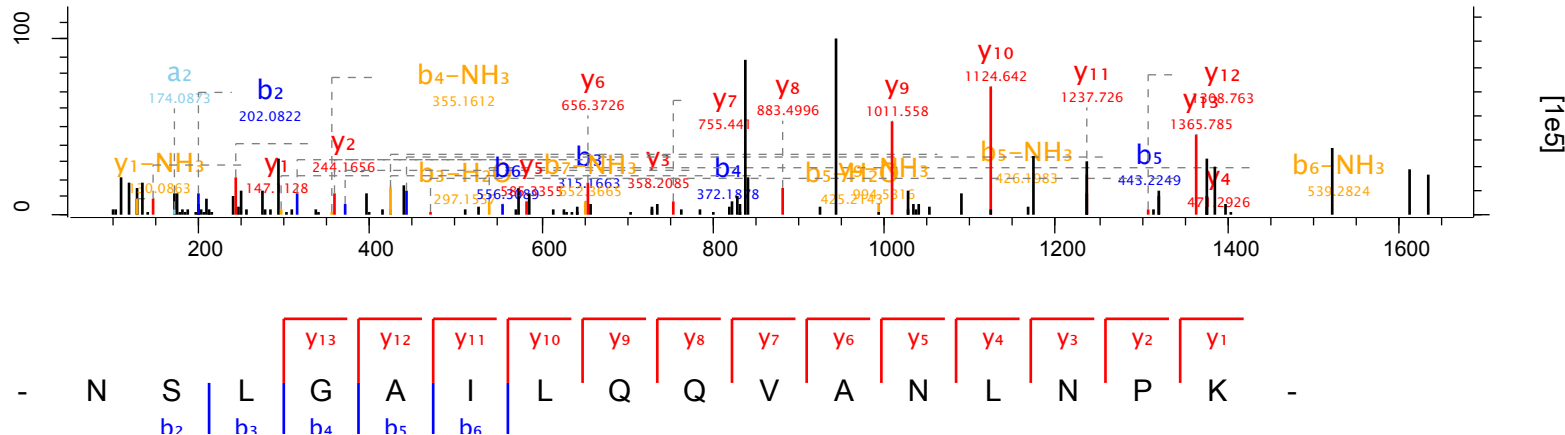



| Raw file                                  | Scan  | Method    | Score | m/z    | Gene names |
|-------------------------------------------|-------|-----------|-------|--------|------------|
| 20121213_EXQ1_AtDe_50CM_LFQ_myotubes_OG11 | 66330 | FTMS; HCD | 76.01 | 719.45 | Slc36a4    |

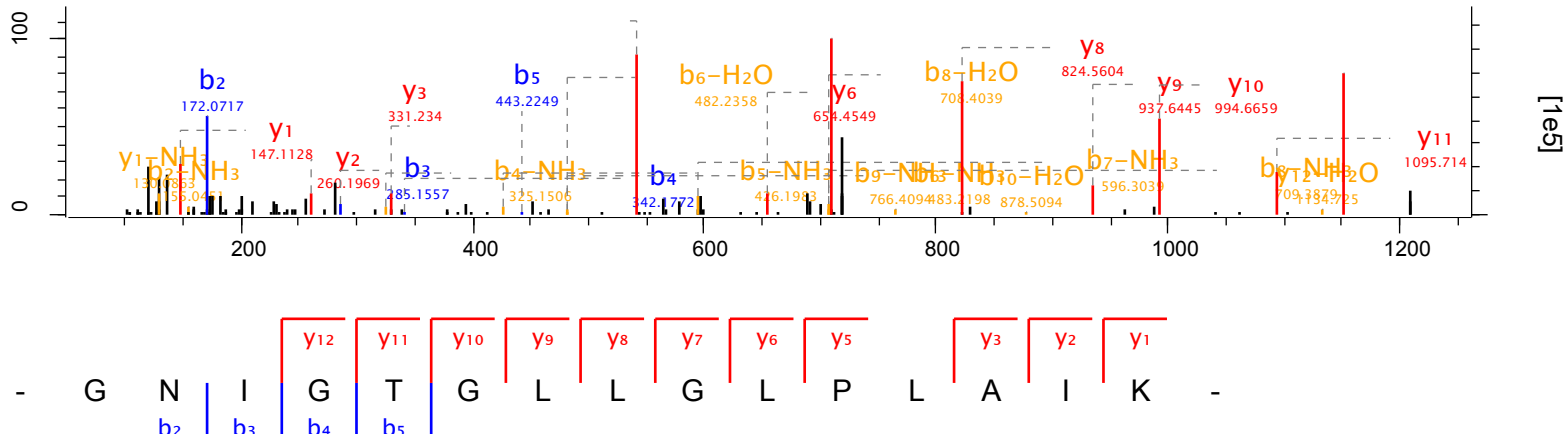

| Raw file                                  | Scan  | Method    | Score  | m/z | Gene names |
|-------------------------------------------|-------|-----------|--------|-----|------------|
| 20121213_EXQ1_AtDe_50CM_LFQ_myotubes_OG11 | 68366 | FTMS; HCD | 135.14 | 853 | Gemin7     |

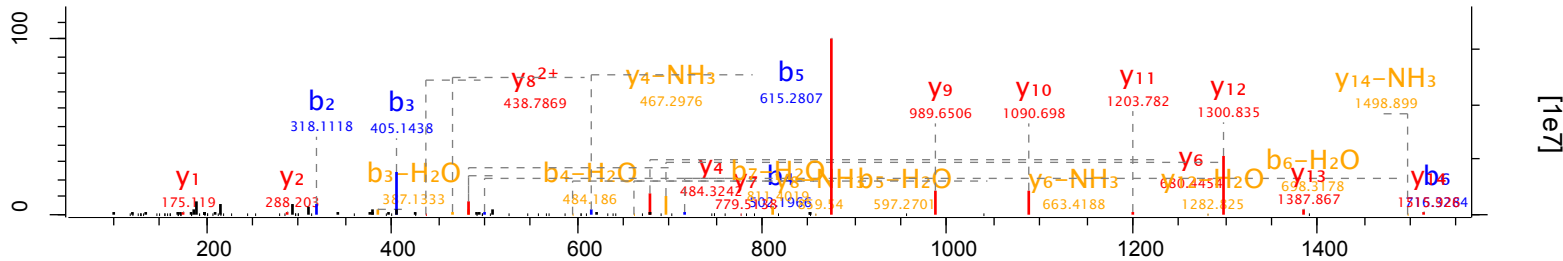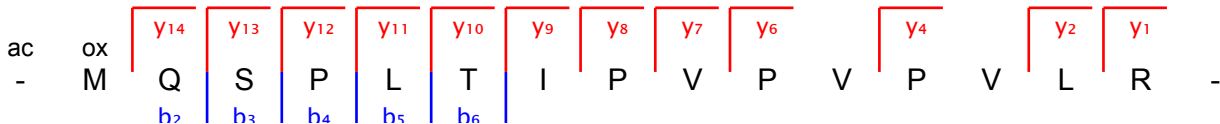

| Raw file                                  | Scan  | Method    | Score | m/z    | Gene names |
|-------------------------------------------|-------|-----------|-------|--------|------------|
| 20121213_EXQ1_AtDe_50CM_LFQ_myotubes_OG12 | 11441 | FTMS; HCD | 61.26 | 542.49 | Prdm5      |

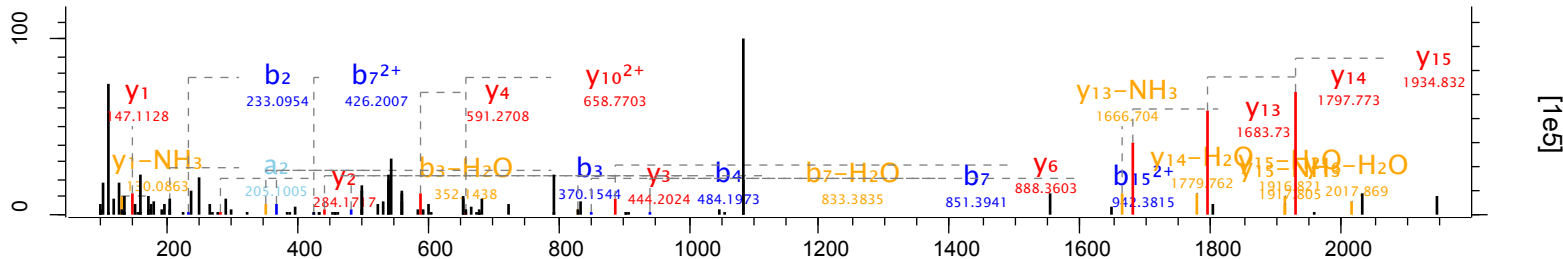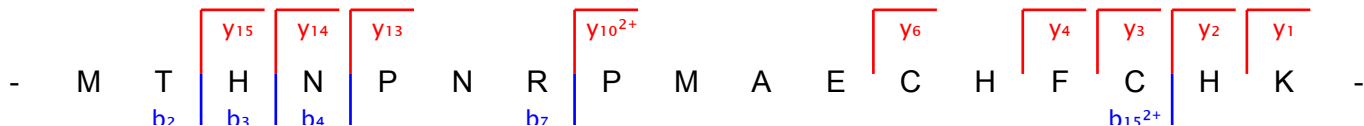

| Raw file                                  | Scan  | Method    | Score | m/z   | Gene names |
|-------------------------------------------|-------|-----------|-------|-------|------------|
| 20121213_EXQ1_AtDe_50CM_LFQ_myotubes_OG12 | 13791 | FTMS; HCD | 66.83 | 608.3 | Sema3g     |

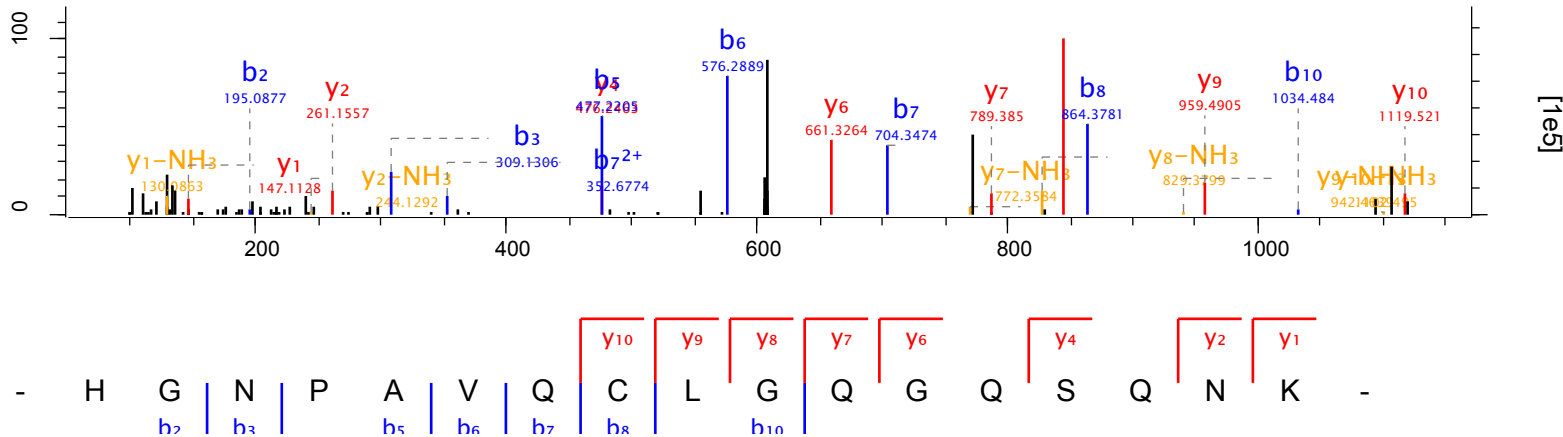

| Raw file                                  | Scan  | Method    | Score  | m/z    | Gene names |
|-------------------------------------------|-------|-----------|--------|--------|------------|
| 20121213_EXQ1_AtDe_50CM_LFQ_myotubes_OG12 | 15668 | FTMS; HCD | 149.58 | 608.83 | Stx11      |

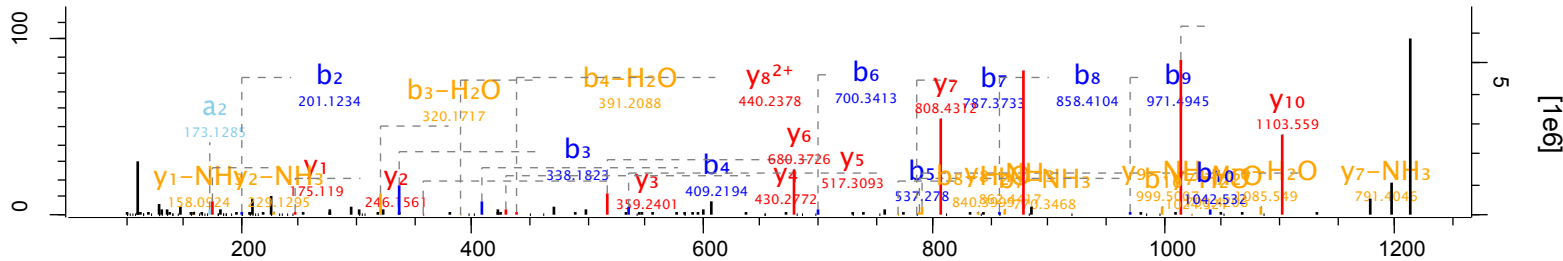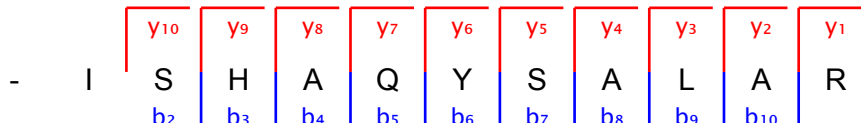

| Raw file                                  | Scan  | Method    | Score | m/z    | Gene names |
|-------------------------------------------|-------|-----------|-------|--------|------------|
| 20121213_EXQ1_AtDe_50CM_LFQ_myotubes_OG12 | 24397 | FTMS; HCD | 88.1  | 632.81 | Fbx122     |

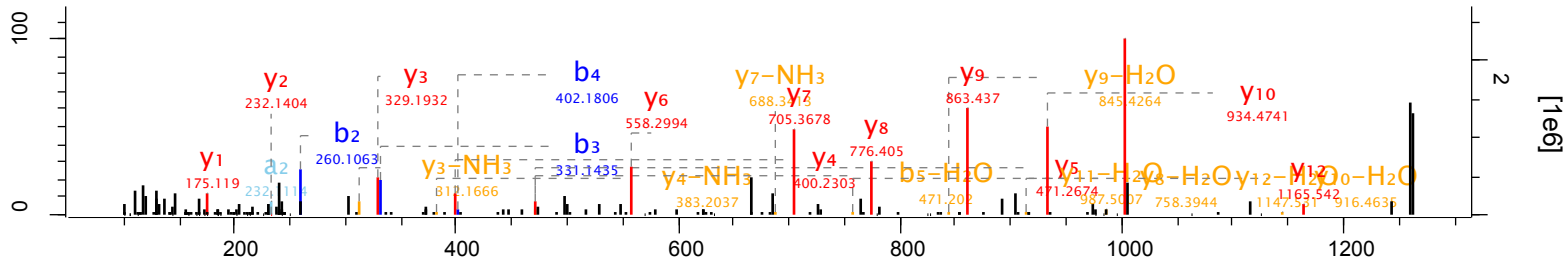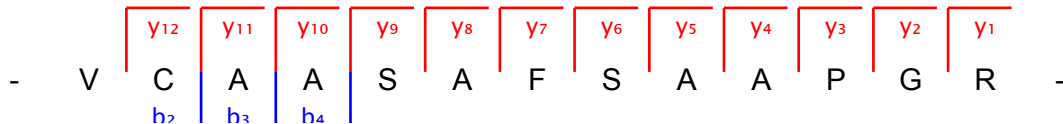

| Raw file                                  | Scan  | Method    | Score | m/z    | Gene names |
|-------------------------------------------|-------|-----------|-------|--------|------------|
| 20121213_EXQ1_AtDe_50CM_LFQ_myotubes_OG12 | 24575 | FTMS; HCD | 91.31 | 584.94 | Polr3k     |

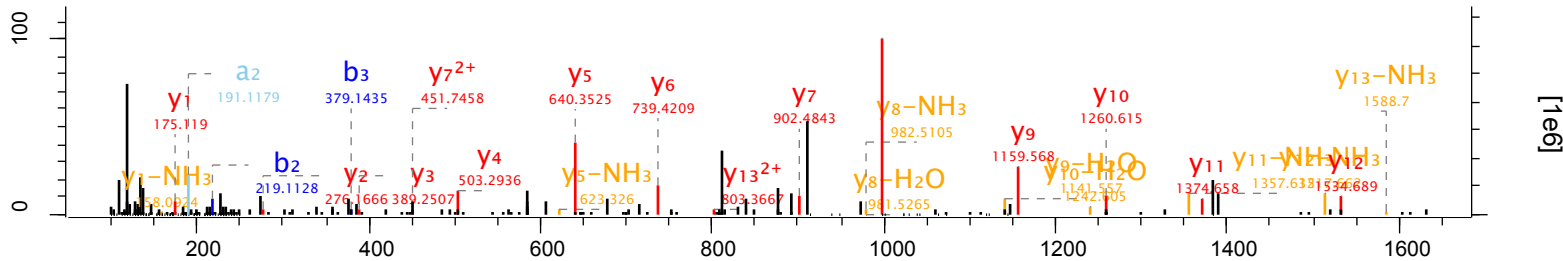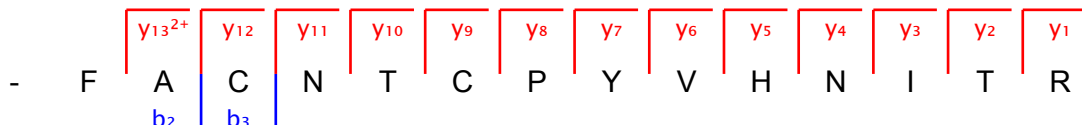

| Raw file                                  | Scan  | Method    | Score | m/z   | Gene names |
|-------------------------------------------|-------|-----------|-------|-------|------------|
| 20121213_EXQ1_AtDe_50CM_LFQ_myotubes_OG12 | 24926 | FTMS; HCD | 89.68 | 520.3 | Eya2       |

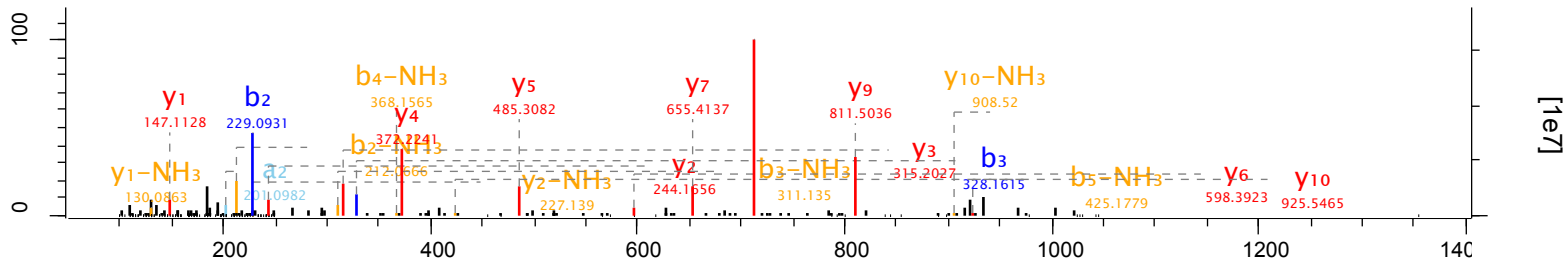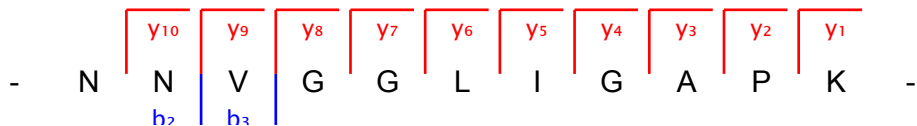



| Raw file                                  | Scan  | Method    | Score | m/z    | Gene names |
|-------------------------------------------|-------|-----------|-------|--------|------------|
| 20121213_EXQ1_AtDe_50CM_LFQ_myotubes_OG12 | 26728 | FTMS; HCD | 96.23 | 589.83 | Kctd18     |

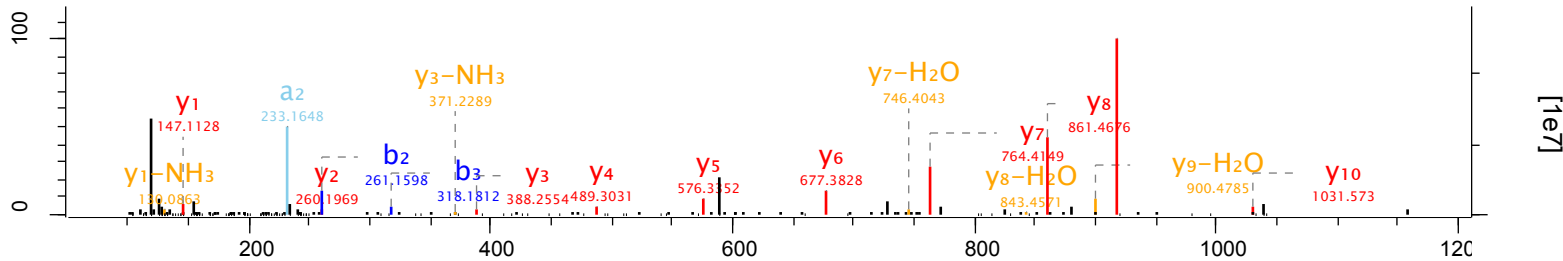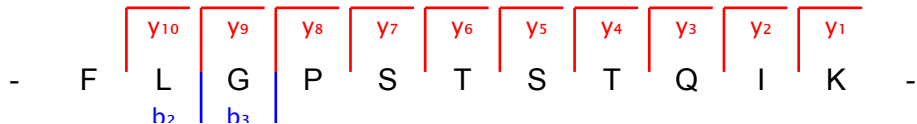

| Raw file                                  | Scan  | Method    | Score  | m/z    | Gene names |
|-------------------------------------------|-------|-----------|--------|--------|------------|
| 20121213_EXQ1_AtDe_50CM_LFQ_myotubes_OG12 | 28025 | FTMS; HCD | 138.25 | 588.35 | Syngn2     |

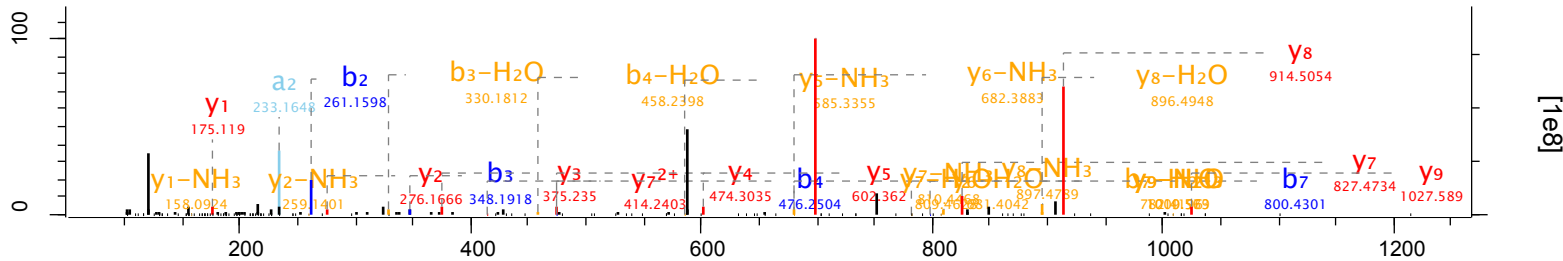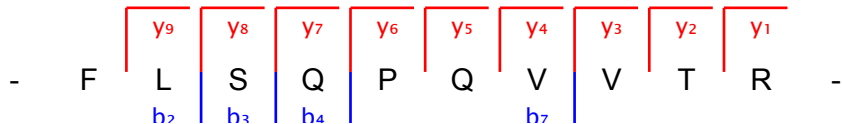

| Raw file                                  | Scan  | Method    | Score | m/z    | Gene names |
|-------------------------------------------|-------|-----------|-------|--------|------------|
| 20121213_EXQ1_AtDe_50CM_LFQ_myotubes_OG12 | 31749 | FTMS; HCD | 89.32 | 562.82 | Tmem169    |

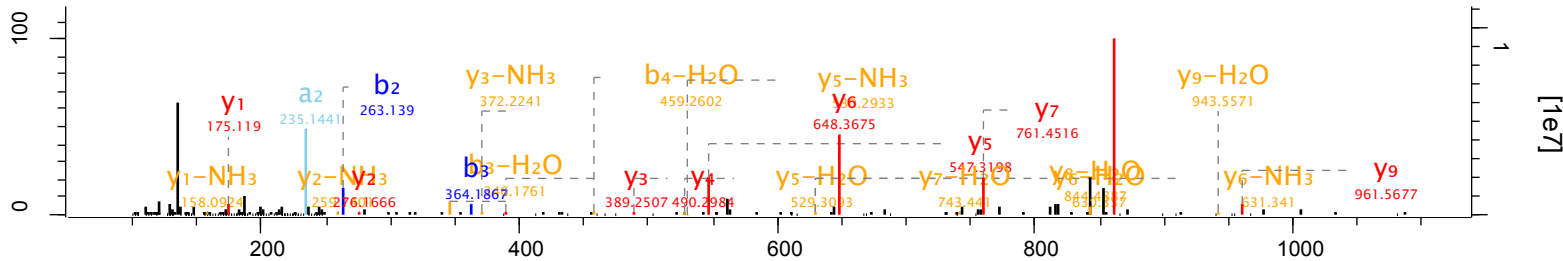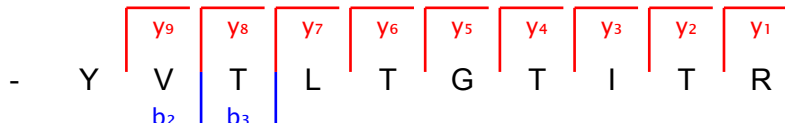

| Raw file                                  | Scan  | Method    | Score  | m/z     | Gene names |
|-------------------------------------------|-------|-----------|--------|---------|------------|
| 20121213_EXQ1_AtDe_50CM_LFQ_myotubes_OG12 | 33921 | FTMS; HCD | 232.59 | 1033.05 | Taf10      |

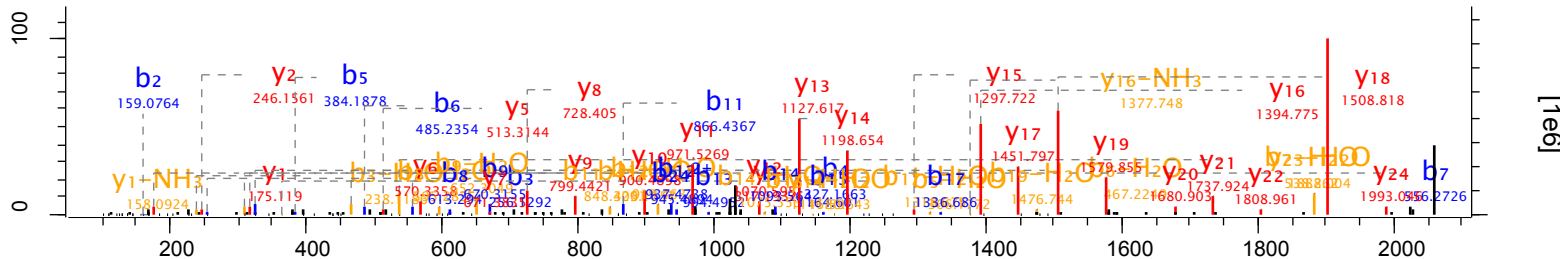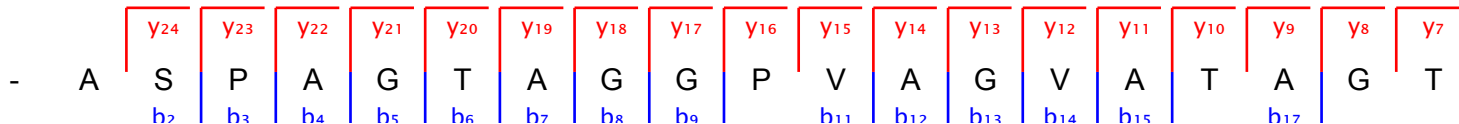

| Raw file                                  | Scan  | Method    | Score | m/z    | Gene names |
|-------------------------------------------|-------|-----------|-------|--------|------------|
| 20121213_EXQ1_AtDe_50CM_LFQ_myotubes_OG12 | 33969 | FTMS; HCD | 44.16 | 688.64 | Taf10      |

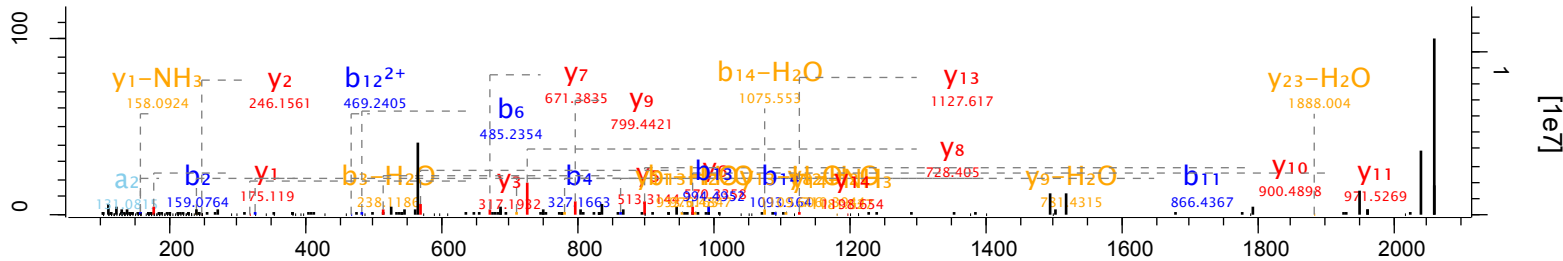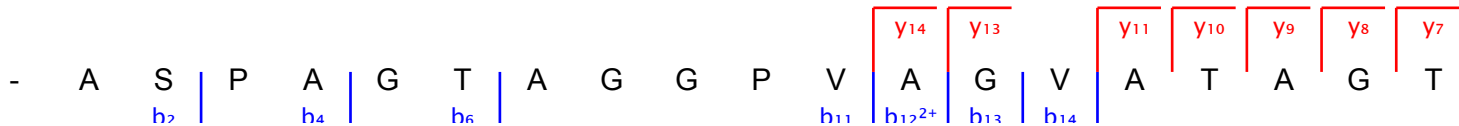

| Raw file                                  | Scan  | Method    | Score  | m/z    | Gene names |
|-------------------------------------------|-------|-----------|--------|--------|------------|
| 20121213_EXQ1_AtDe_50CM_LFQ_myotubes_OG12 | 39661 | FTMS; HCD | 112.67 | 861.48 | Tanc2      |

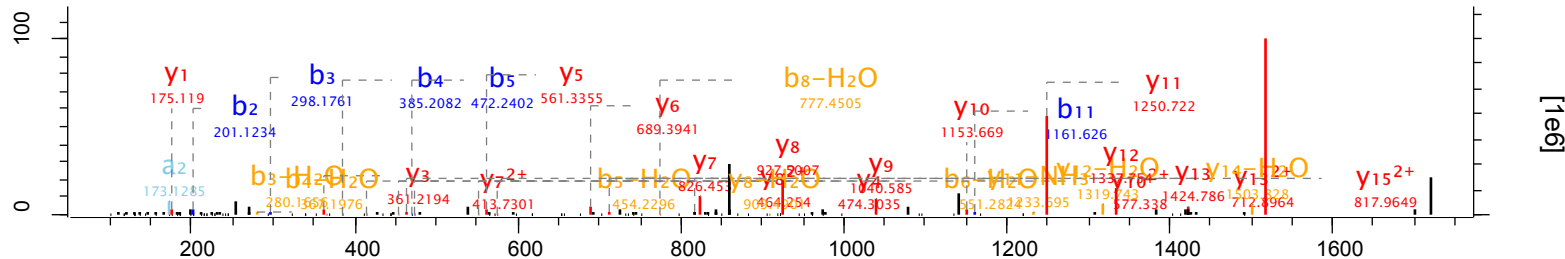

- S L P S S P L L T H Q S I S V R -  
 b<sub>2</sub> b<sub>3</sub> b<sub>4</sub> b<sub>5</sub> b<sub>11</sub>  
 y<sub>15</sub><sup>2+</sup> y<sub>14</sub> y<sub>13</sub> y<sub>12</sub> y<sub>11</sub> y<sub>10</sub> y<sub>9</sub> y<sub>8</sub> y<sub>7</sub> y<sub>6</sub> y<sub>5</sub> y<sub>4</sub> y<sub>3</sub> y<sub>1</sub>

| Raw file                                  | Scan  | Method    | Score  | m/z    | Gene names |
|-------------------------------------------|-------|-----------|--------|--------|------------|
| 20121213_EXQ1_AtDe_50CM_LFQ_myotubes_OG12 | 40728 | FTMS; HCD | 209.56 | 874.44 | Bri3       |

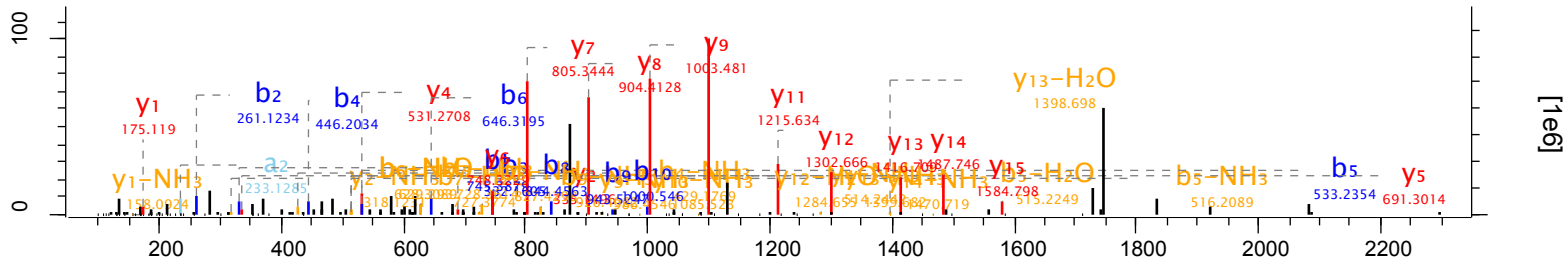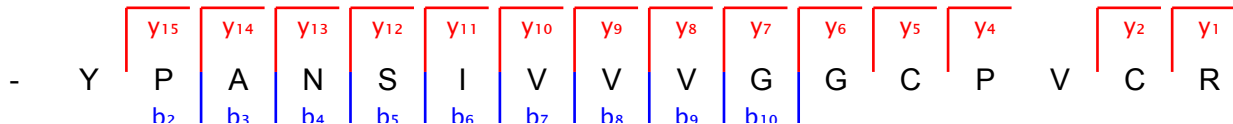

| Raw file                                  | Scan  | Method    | Score | m/z    | Gene names |
|-------------------------------------------|-------|-----------|-------|--------|------------|
| 20121213_EXQ1_AtDe_50CM_LFQ_myotubes_OG12 | 42348 | FTMS; HCD | 77.07 | 482.79 | Plch1      |

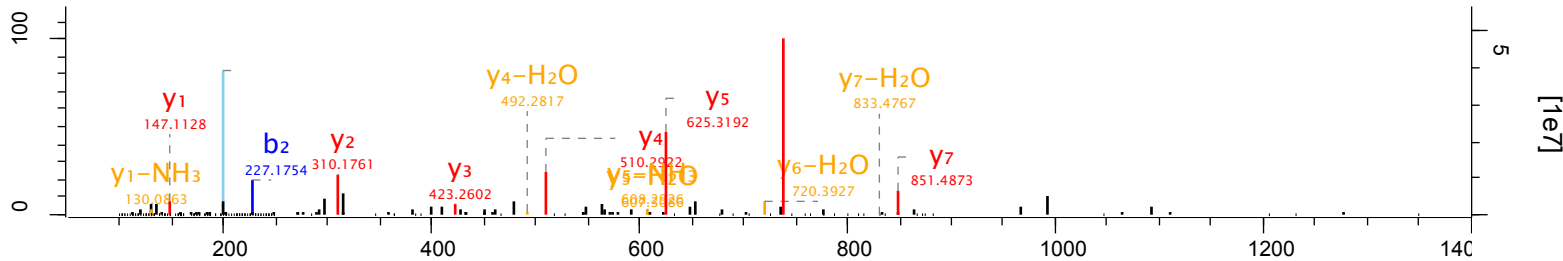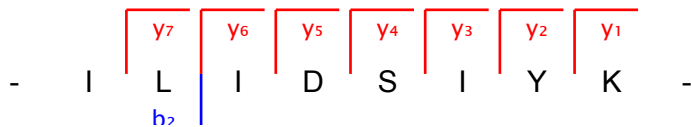



| Raw file                                  | Scan  | Method    | Score | m/z    | Gene names |
|-------------------------------------------|-------|-----------|-------|--------|------------|
| 20121213_EXQ1_AtDe_50CM_LFQ_myotubes_OG12 | 43098 | FTMS; HCD | 72.57 | 887.46 | Ino80d     |

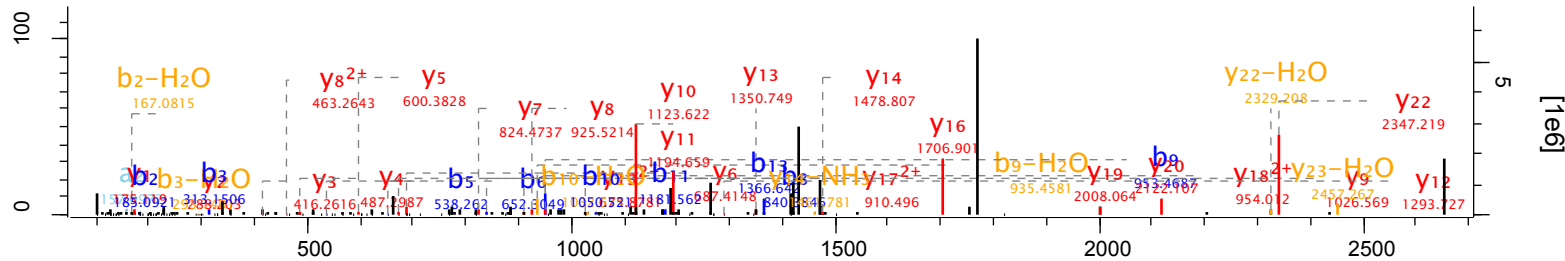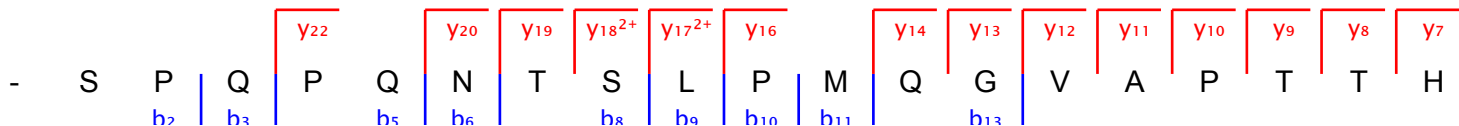

| Raw file                                  | Scan  | Method    | Score  | m/z    | Gene names |
|-------------------------------------------|-------|-----------|--------|--------|------------|
| 20121213_EXQ1_AtDe_50CM_LFQ_myotubes_OG12 | 43399 | FTMS; HCD | 156.01 | 619.88 | Hfe        |

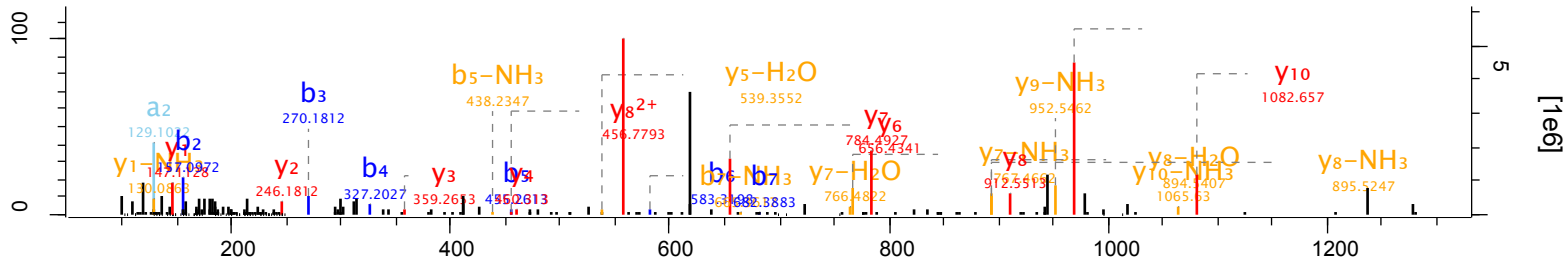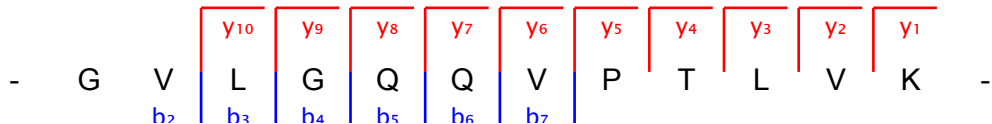

| Raw file                                  | Scan  | Method    | Score  | m/z    | Gene names |
|-------------------------------------------|-------|-----------|--------|--------|------------|
| 20121213_EXQ1_AtDe_50CM_LFQ_myotubes_OG12 | 45569 | FTMS; HCD | 159.52 | 773.91 | Adamts16   |

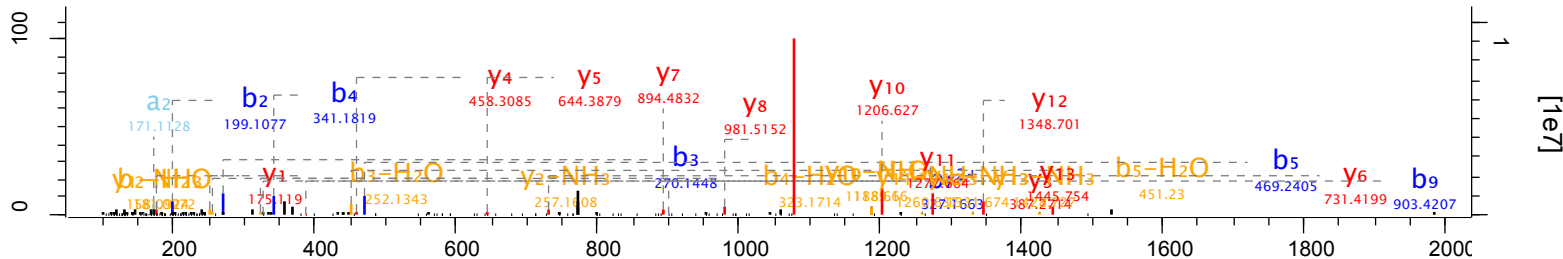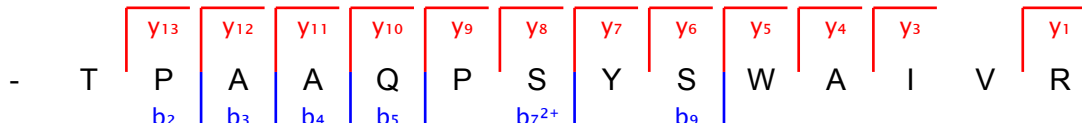

| Raw file                                  | Scan  | Method    | Score  | m/z    | Gene names |
|-------------------------------------------|-------|-----------|--------|--------|------------|
| 20121213_EXQ1_AtDe_50CM_LFQ_myotubes_OG12 | 45763 | FTMS; HCD | 100.93 | 472.61 | Cables2    |

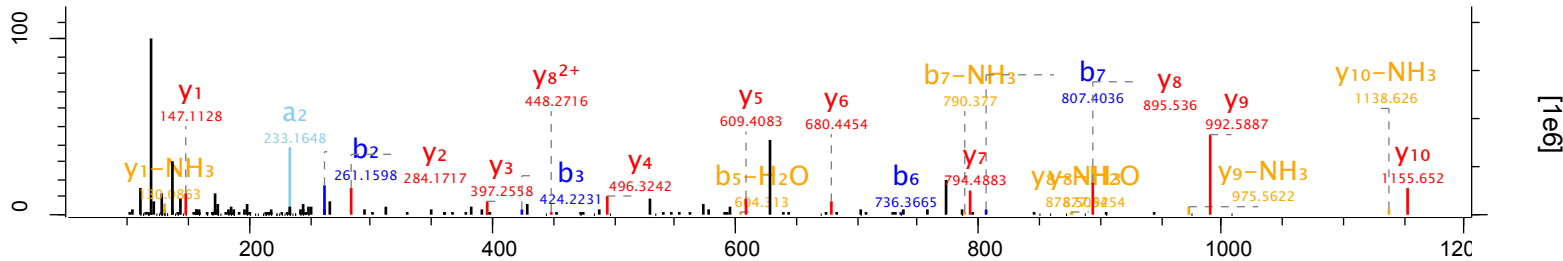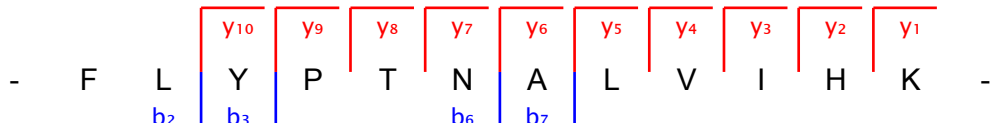

| Raw file                                  | Scan  | Method    | Score | m/z   | Gene names |
|-------------------------------------------|-------|-----------|-------|-------|------------|
| 20121213_EXQ1_AtDe_50CM_LFQ_myotubes_OG12 | 46686 | FTMS; HCD | 84.65 | 881.5 | Krtcap2    |

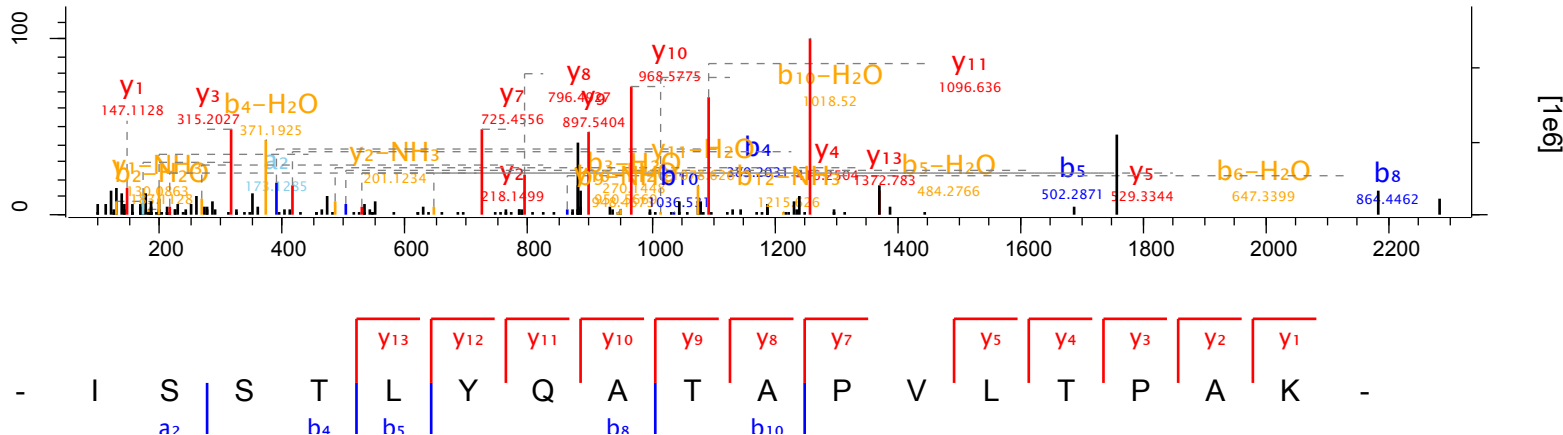

| Raw file                                  | Scan  | Method    | Score | m/z     | Gene names |
|-------------------------------------------|-------|-----------|-------|---------|------------|
| 20121213_EXQ1_AtDe_50CM_LFQ_myotubes_OG12 | 47285 | FTMS; HCD | 95.59 | 1067.01 | Unc50      |

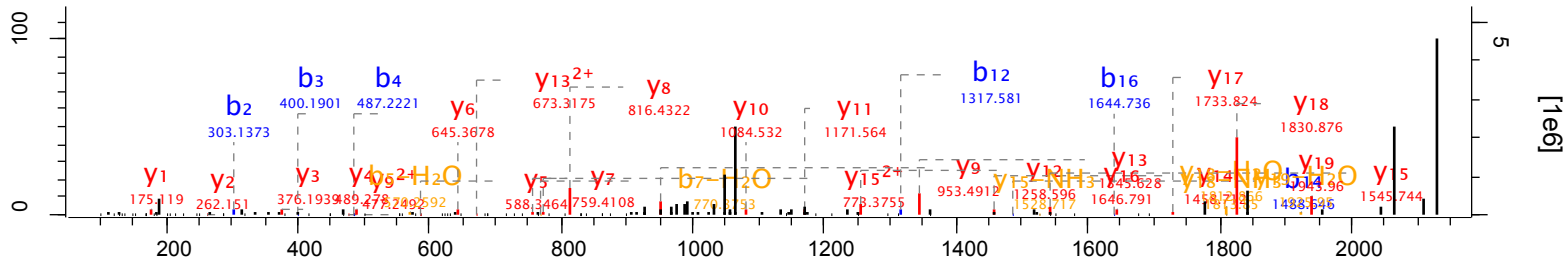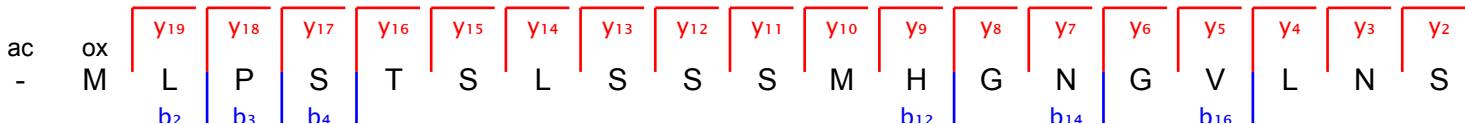

| Raw file                                  | Scan  | Method    | Score  | m/z    | Gene names |
|-------------------------------------------|-------|-----------|--------|--------|------------|
| 20121213_EXQ1_AtDe_50CM_LFQ_myotubes_OG12 | 47757 | FTMS; HCD | 148.41 | 880.99 | Krtcap2    |

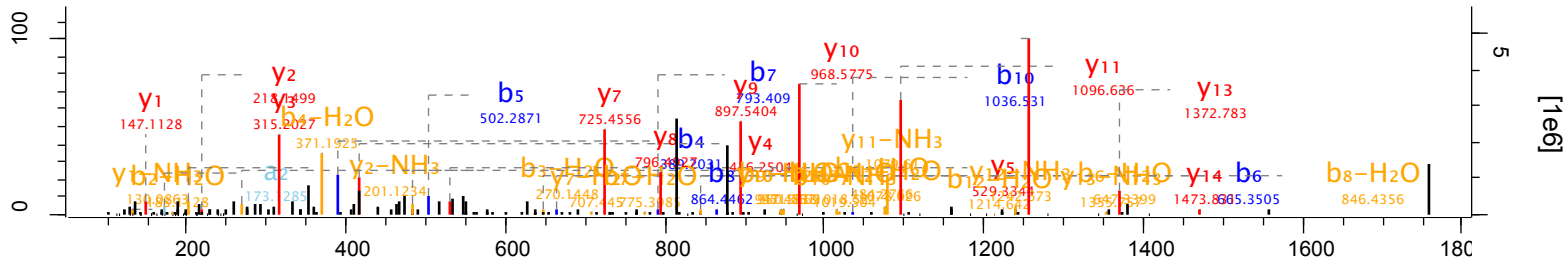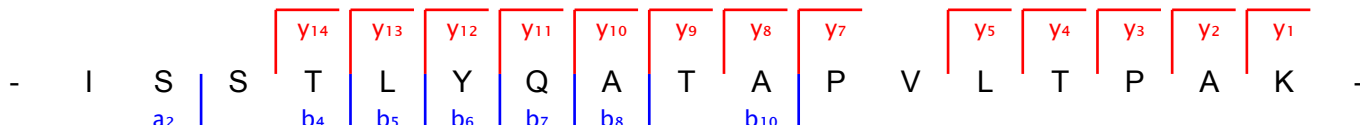

| Raw file                                  | Scan  | Method    | Score  | m/z | Gene names |
|-------------------------------------------|-------|-----------|--------|-----|------------|
| 20121213_EXQ1_AtDe_50CM_LFQ_myotubes_OG12 | 47828 | FTMS; HCD | 139.49 | 588 | Krtcap2    |

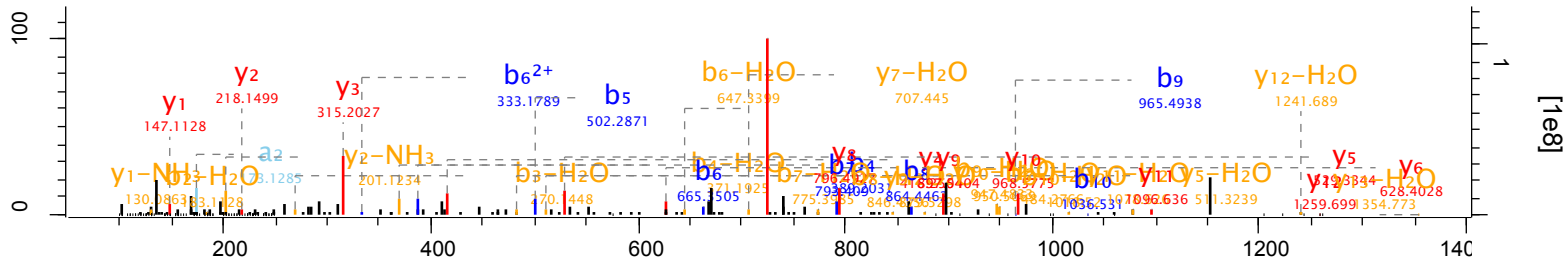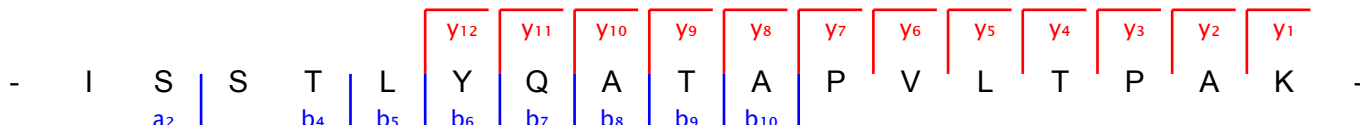



| Raw file                                  | Scan  | Method    | Score | m/z | Gene names |
|-------------------------------------------|-------|-----------|-------|-----|------------|
| 20121213_EXQ1_AtDe_50CM_LFQ_myotubes_OG12 | 48199 | FTMS; HCD | 33.77 | 881 | Krtcap2    |

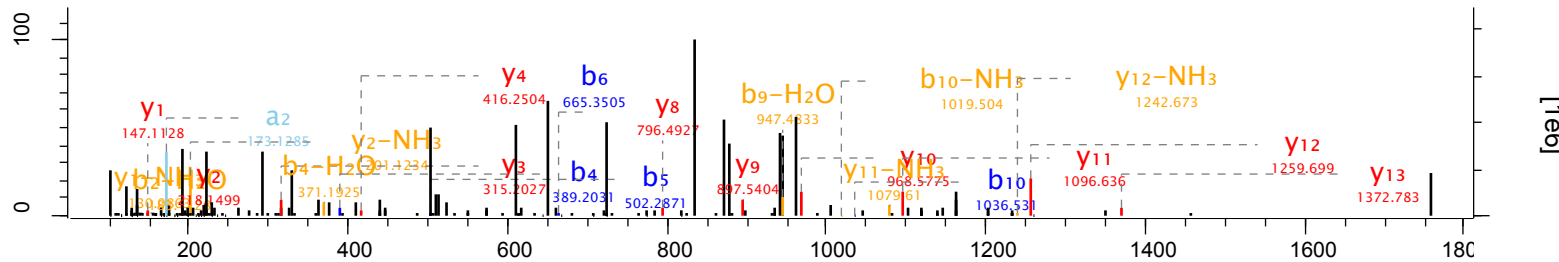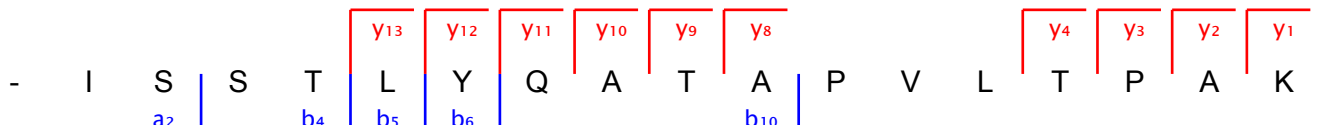

| Raw file                                  | Scan  | Method    | Score  | m/z    | Gene names |
|-------------------------------------------|-------|-----------|--------|--------|------------|
| 20121213_EXQ1_AtDe_50CM_LFQ_myotubes_OG12 | 48235 | FTMS; HCD | 169.37 | 538.82 | Nusap1     |

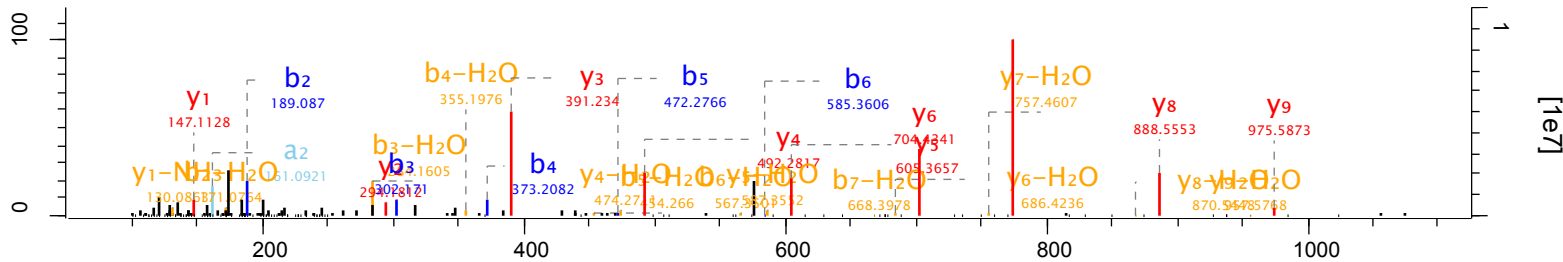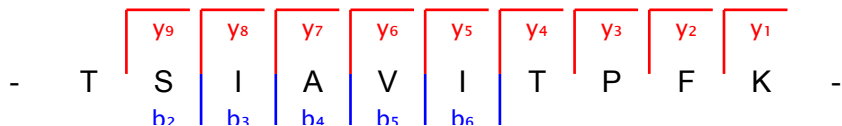

| Raw file                                  | Scan  | Method    | Score | m/z    | Gene names |
|-------------------------------------------|-------|-----------|-------|--------|------------|
| 20121213_EXQ1_AtDe_50CM_LFQ_myotubes_OG12 | 49806 | FTMS; HCD | 98.51 | 623.67 | Trabd2b    |

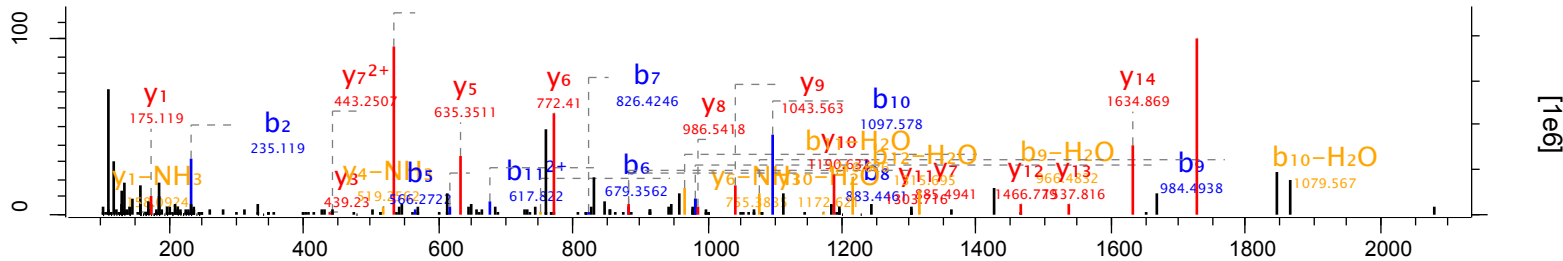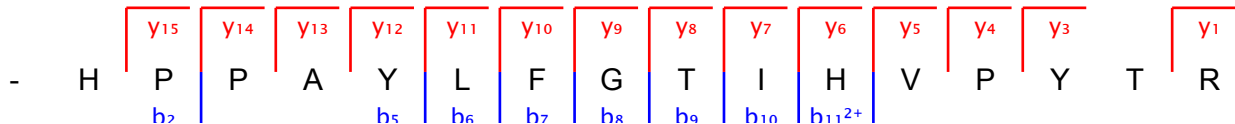

| Raw file                                  | Scan  | Method    | Score  | m/z    | Gene names |
|-------------------------------------------|-------|-----------|--------|--------|------------|
| 20121213_EXQ1_AtDe_50CM_LFQ_myotubes_OG12 | 50466 | FTMS; HCD | 128.08 | 781.44 | Ptger4     |

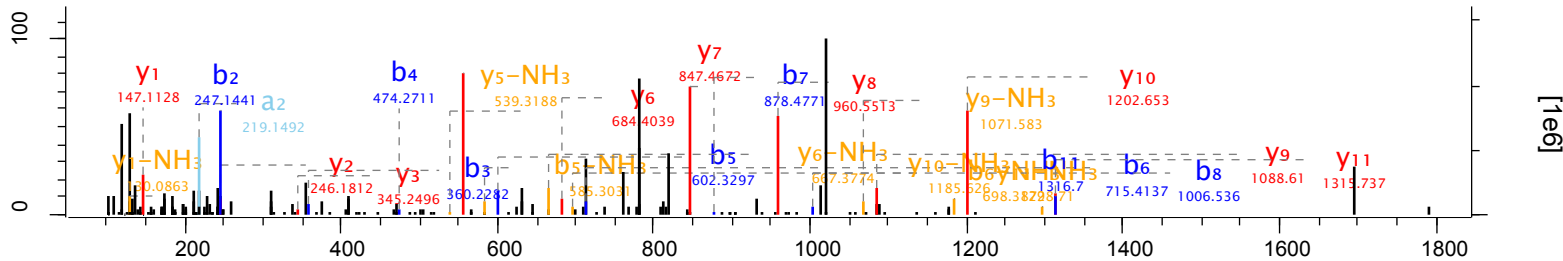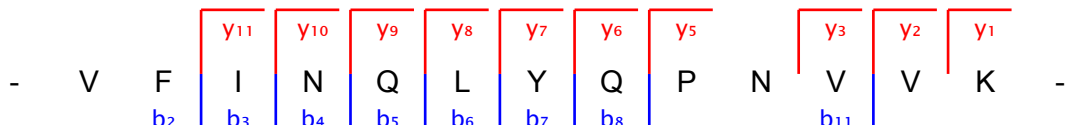

| Raw file                                  | Scan  | Method    | Score | m/z    | Gene names |
|-------------------------------------------|-------|-----------|-------|--------|------------|
| 20121213_EXQ1_AtDe_50CM_LFQ_myotubes_OG12 | 50476 | FTMS; HCD | 58.17 | 782.44 | Ptger4     |

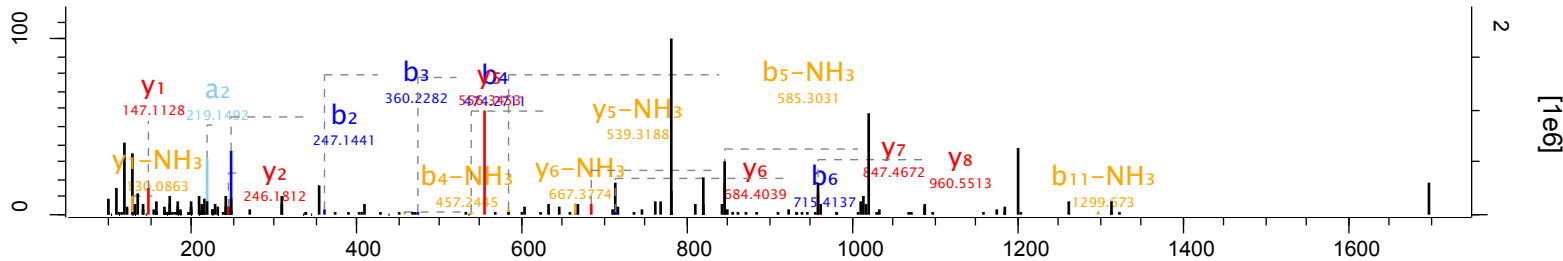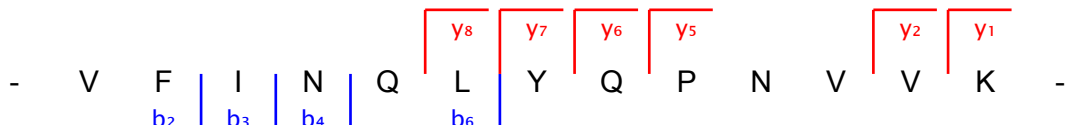

| Raw file                                  | Scan  | Method    | Score | m/z    | Gene names |
|-------------------------------------------|-------|-----------|-------|--------|------------|
| 20121213_EXQ1_AtDe_50CM_LFQ_myotubes_OG12 | 50721 | FTMS; HCD | 164.7 | 826.45 | Kremen1    |

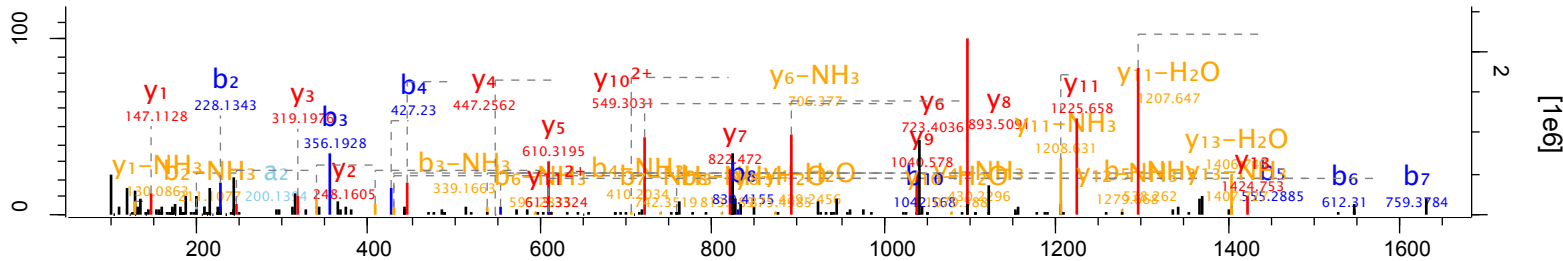

Sequence: - I N Q A Q G F A V L Y Q A T K -

Fragmentation sites (b and y ions) are indicated by brackets below the sequence:

- b<sub>2</sub> (under N)
- b<sub>3</sub> (under Q)
- b<sub>4</sub> (under A)
- b<sub>5</sub> (under Q)
- b<sub>6</sub> (under G)
- b<sub>7</sub> (under F)
- b<sub>8</sub> (under A)
- b<sub>10</sub> (under L)

Corresponding y ions (y<sub>1</sub> to y<sub>13</sub>) are shown above the sequence, aligned with the b ion brackets.

| Raw file                                  | Scan  | Method    | Score | m/z    | Gene names |
|-------------------------------------------|-------|-----------|-------|--------|------------|
| 20121213_EXQ1_AtDe_50CM_LFQ_myotubes_OG12 | 54761 | FTMS; HCD | 52.58 | 709.37 | Lphn3      |

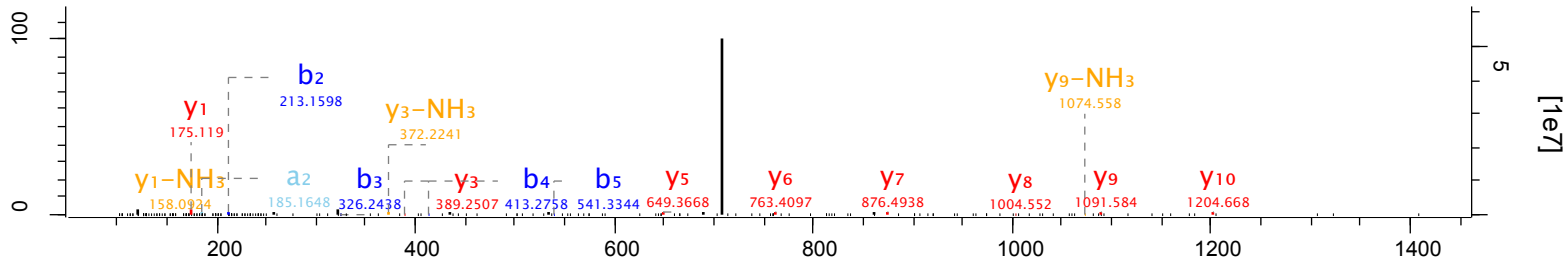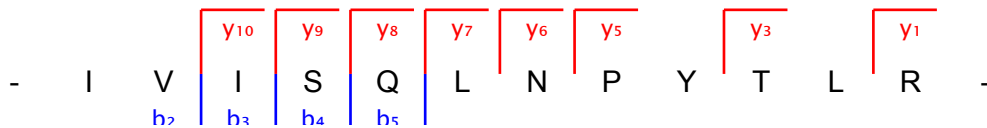

| Raw file                                  | Scan  | Method    | Score  | m/z     | Gene names |
|-------------------------------------------|-------|-----------|--------|---------|------------|
| 20121213_EXQ1_AtDe_50CM_LFQ_myotubes_OG12 | 55445 | FTMS; HCD | 119.27 | 1059.52 | Unc50      |

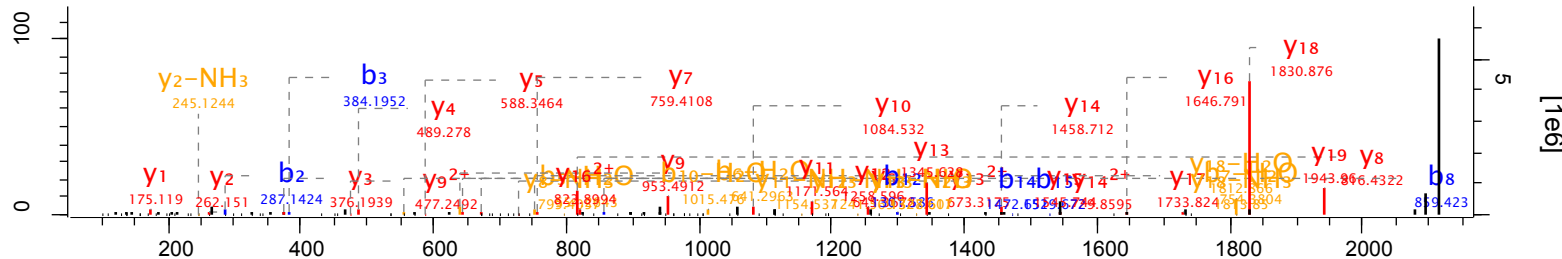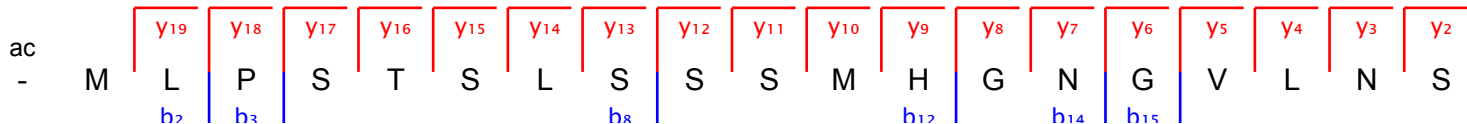



| Raw file                                  | Scan  | Method    | Score | m/z    | Gene names |
|-------------------------------------------|-------|-----------|-------|--------|------------|
| 20121213_EXQ1_AtDe_50CM_LFQ_myotubes_OG12 | 57129 | FTMS; HCD | 89.36 | 848.95 | Mea1       |

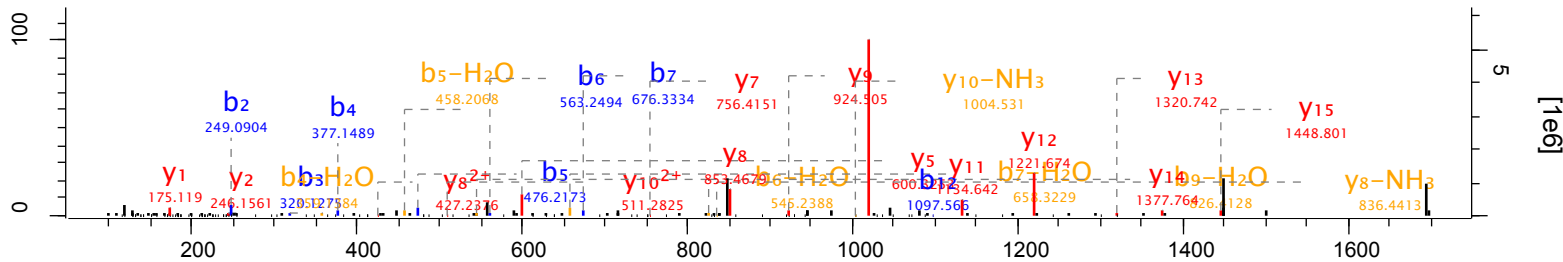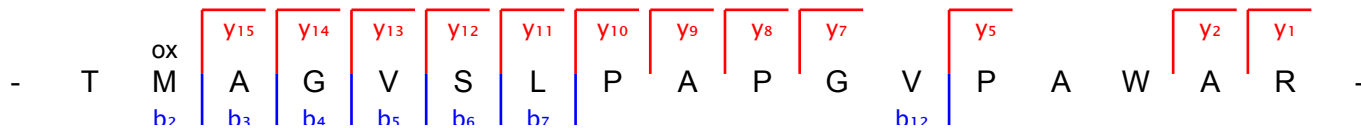

| Raw file                                  | Scan  | Method    | Score  | m/z    | Gene names |
|-------------------------------------------|-------|-----------|--------|--------|------------|
| 20121213_EXQ1_AtDe_50CM_LFQ_myotubes_OG12 | 57520 | FTMS; HCD | 143.35 | 889.81 | Peli2      |

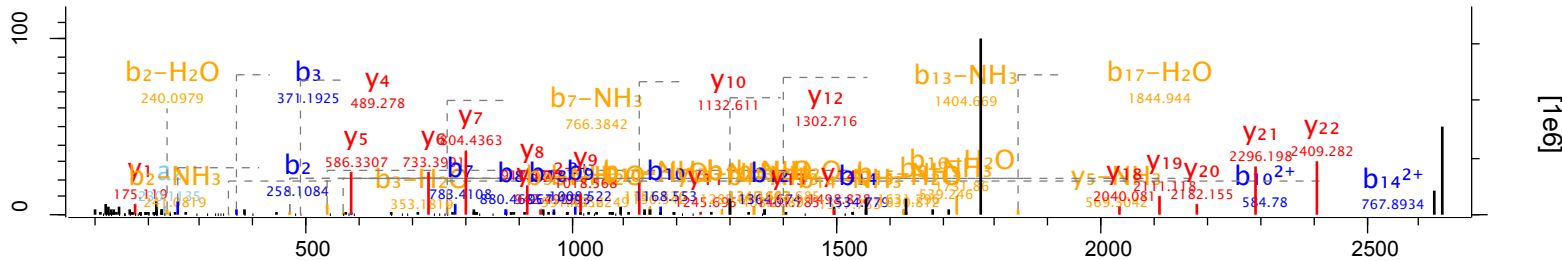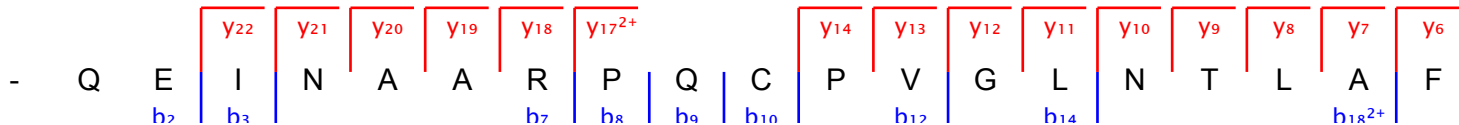

| Raw file                                  | Scan  | Method    | Score  | m/z    | Gene names |
|-------------------------------------------|-------|-----------|--------|--------|------------|
| 20121213_EXQ1_AtDe_50CM_LFQ_myotubes_OG12 | 58285 | FTMS; HCD | 123.08 | 683.99 | Ldlrad3    |

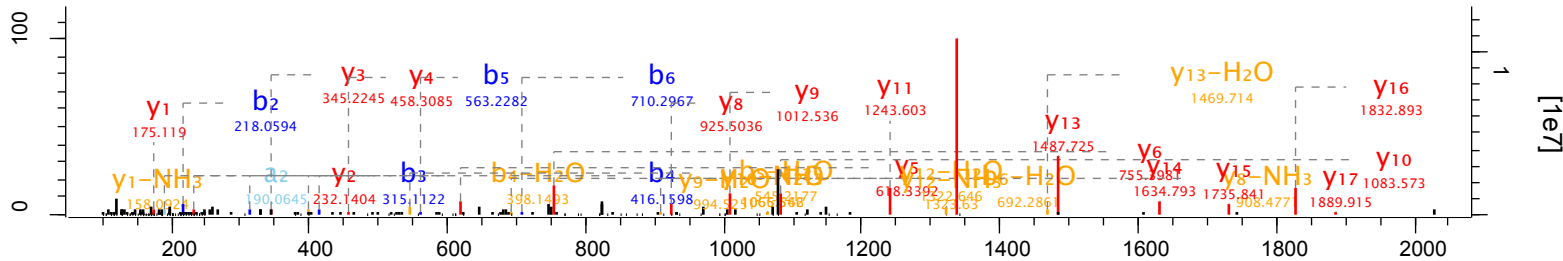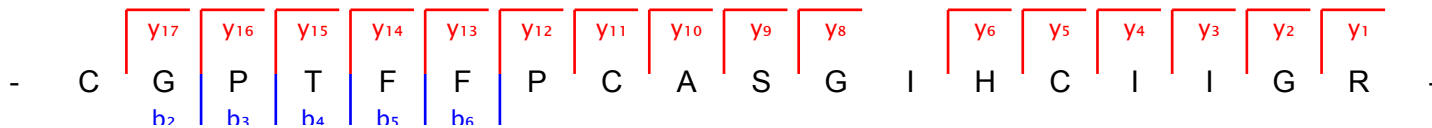

| Raw file                                  | Scan  | Method    | Score | m/z    | Gene names |
|-------------------------------------------|-------|-----------|-------|--------|------------|
| 20121213_EXQ1_AtDe_50CM_LFQ_myotubes_OG12 | 59897 | FTMS; HCD | 52.25 | 577.32 | Cmtm6      |

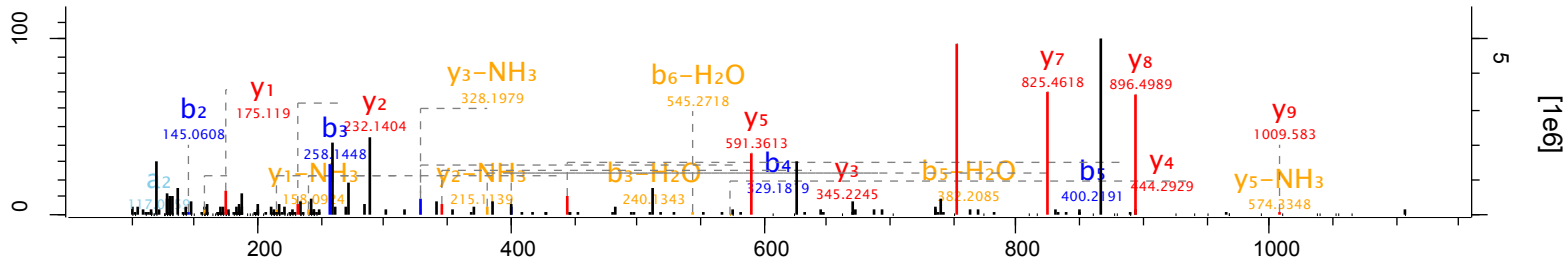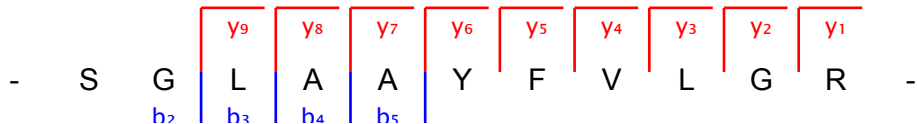

| Raw file                                  | Scan  | Method    | Score  | m/z    | Gene names |
|-------------------------------------------|-------|-----------|--------|--------|------------|
| 20121213_EXQ1_AtDe_50CM_LFQ_myotubes_OG12 | 59930 | FTMS; HCD | 191.22 | 1082.1 | Mkks       |

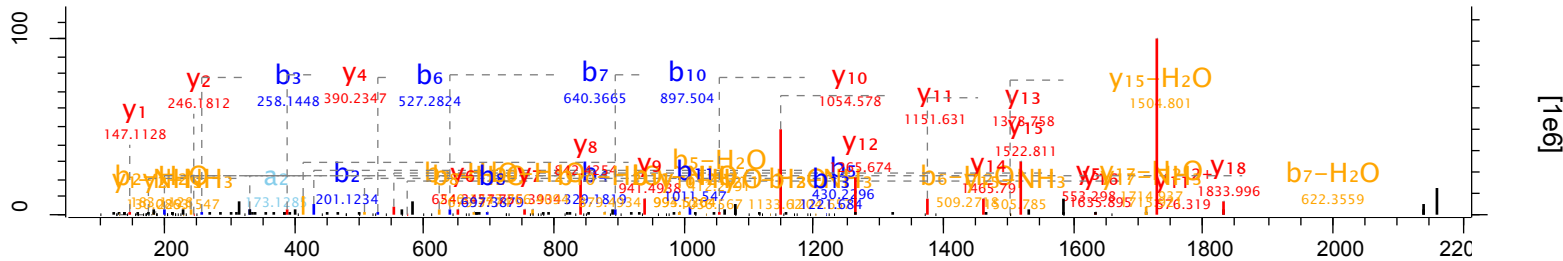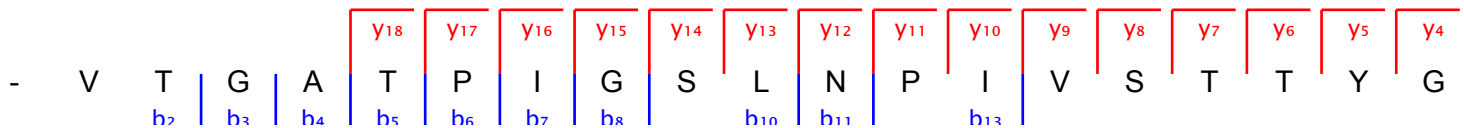

| Raw file                                  | Scan  | Method    | Score  | m/z   | Gene names |
|-------------------------------------------|-------|-----------|--------|-------|------------|
| 20121213_EXQ1_AtDe_50CM_LFQ_myotubes_OG12 | 60536 | FTMS; HCD | 132.76 | 505.3 | Apbb1      |

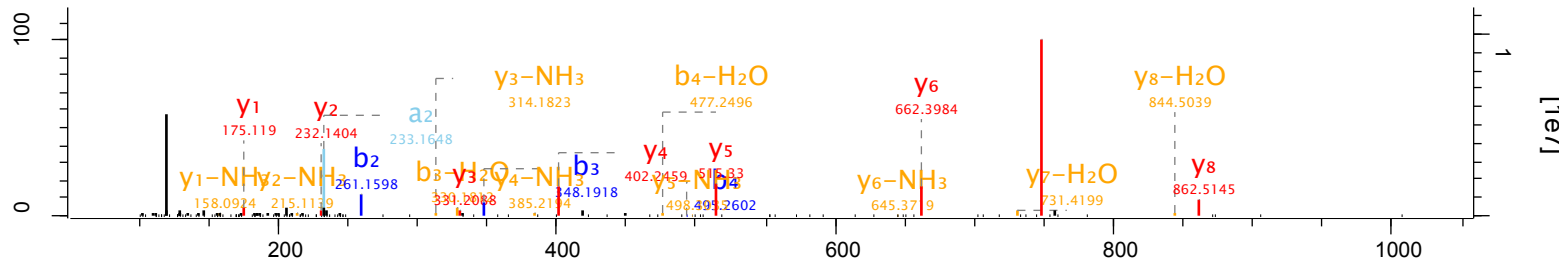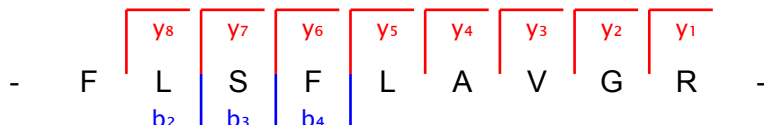

| Raw file                                  | Scan  | Method    | Score  | m/z    | Gene names |
|-------------------------------------------|-------|-----------|--------|--------|------------|
| 20121213_EXQ1_AtDe_50CM_LFQ_myotubes_OG12 | 61080 | FTMS; HCD | 140.93 | 841.45 | Mea1       |

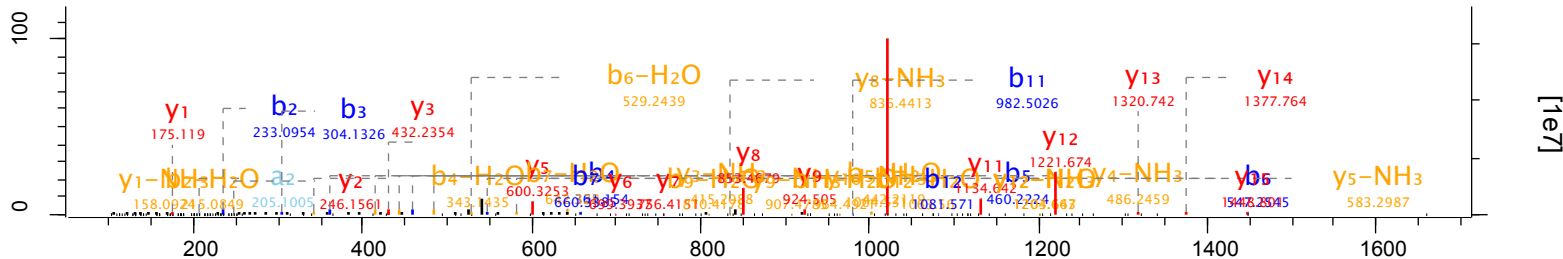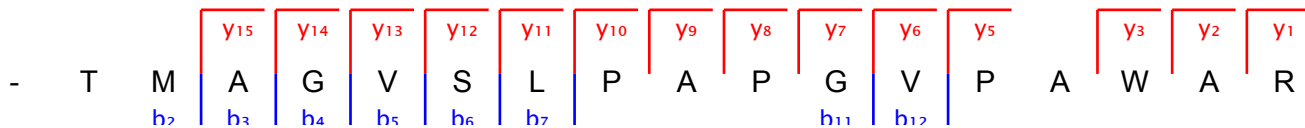

| Raw file                                  | Scan  | Method    | Score  | m/z    | Gene names |
|-------------------------------------------|-------|-----------|--------|--------|------------|
| 20121213_EXQ1_AtDe_50CM_LFQ_myotubes_OG12 | 61204 | FTMS; HCD | 102.64 | 813.96 | Plac8      |

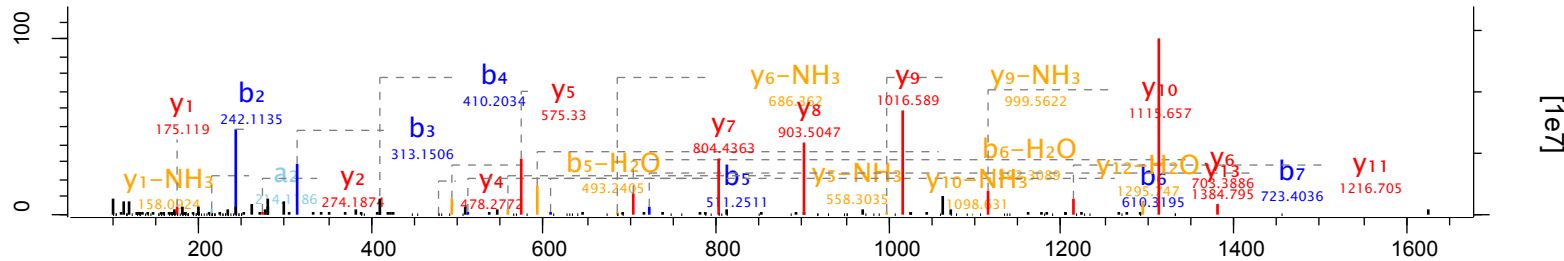

ac

- A Q A P T V I V T Q P G F V R -

h<sub>2</sub> h<sub>3</sub> h<sub>4</sub> h<sub>5</sub> h<sub>6</sub> h<sub>7</sub>

y<sub>13</sub> y<sub>12</sub> y<sub>11</sub> y<sub>10</sub> y<sub>9</sub> y<sub>8</sub> y<sub>7</sub> y<sub>6</sub> y<sub>5</sub> y<sub>4</sub> y<sub>2</sub> y<sub>1</sub>



| Raw file                                  | Scan  | Method    | Score | m/z    | Gene names |
|-------------------------------------------|-------|-----------|-------|--------|------------|
| 20121213_EXQ1_AtDe_50CM_LFQ_myotubes_OG12 | 62314 | FTMS; HCD | 102   | 575.83 | Nth1       |

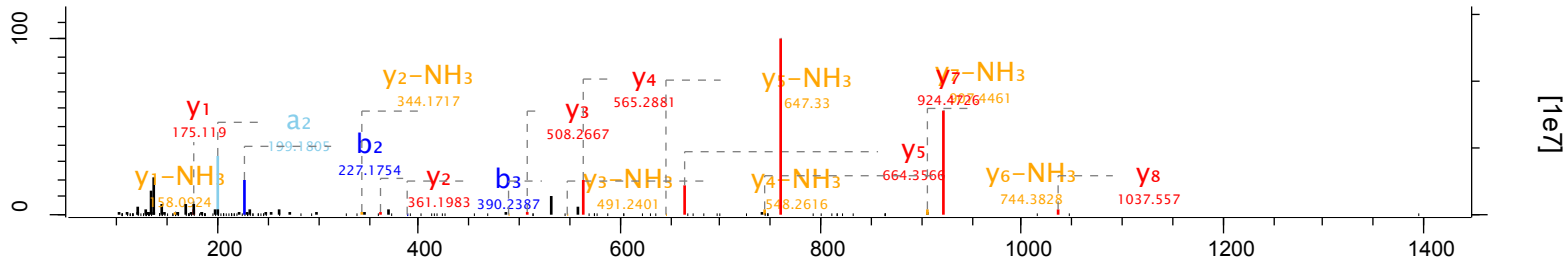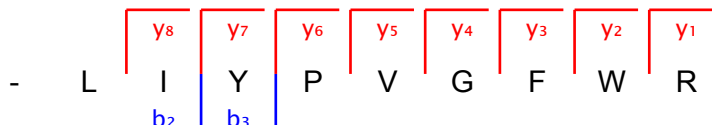

| Raw file                                  | Scan  | Method    | Score  | m/z    | Gene names |
|-------------------------------------------|-------|-----------|--------|--------|------------|
| 20121213_EXQ1_AtDe_50CM_LFQ_myotubes_OG12 | 63344 | FTMS; HCD | 129.11 | 736.72 | Piga       |

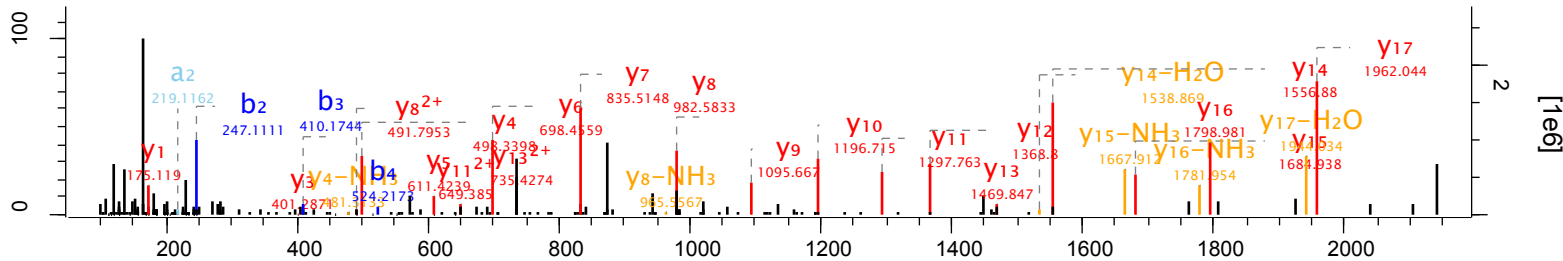

Sequence: - V M Y N Q S T A T T L F H S L P L L R

OX: y17, y16, y15, y14, y13, y12, y11, y10, y9, y8, y7, y6, y5, y4, y3, y1

b2, b3, b4

| Raw file                                  | Scan  | Method    | Score  | m/z    | Gene names |
|-------------------------------------------|-------|-----------|--------|--------|------------|
| 20121213_EXQ1_AtDe_50CM_LFQ_myotubes_OG12 | 64723 | FTMS; HCD | 191.37 | 995.53 | Kctd1      |

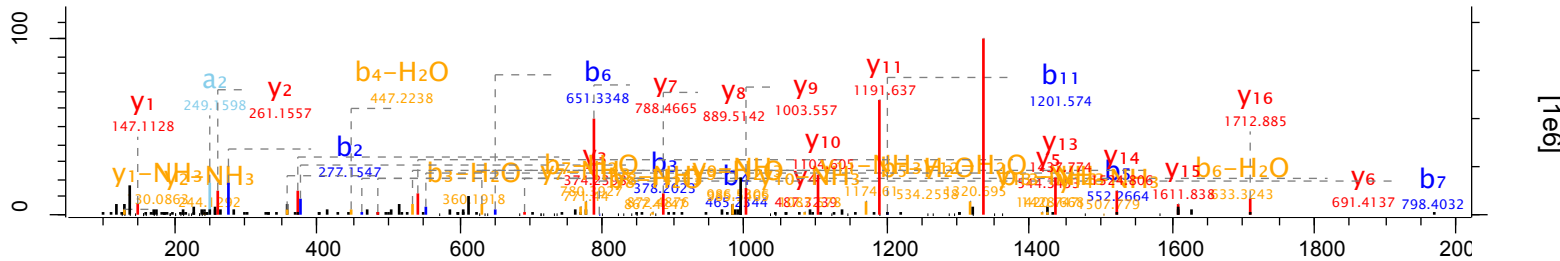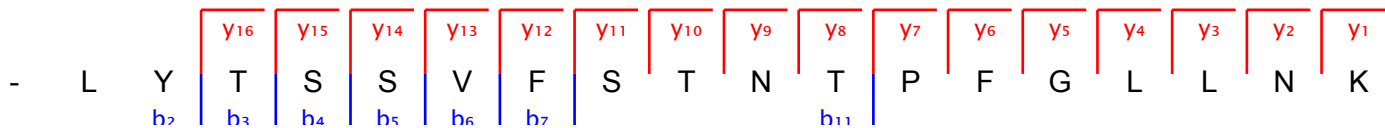

| Raw file                                  | Scan  | Method    | Score | m/z    | Gene names |
|-------------------------------------------|-------|-----------|-------|--------|------------|
| 20121213_EXQ1_AtDe_50CM_LFQ_myotubes_OG12 | 66044 | FTMS; HCD | 79.14 | 774.45 | Cspp1      |

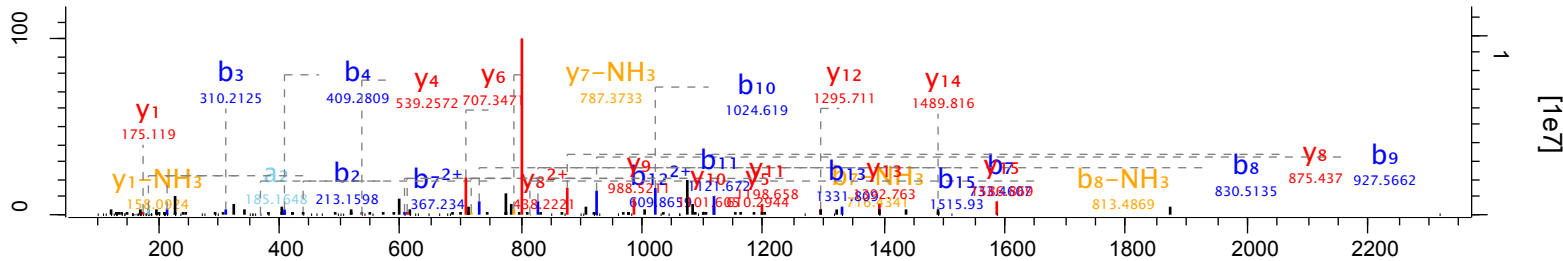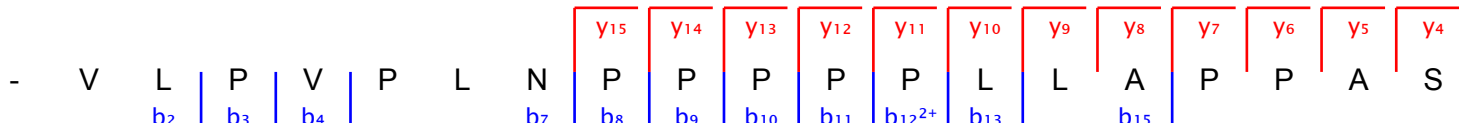

| Raw file                                  | Scan  | Method    | Score | m/z     | Gene names |
|-------------------------------------------|-------|-----------|-------|---------|------------|
| 20121213_EXQ1_AtDe_50CM_LFQ_myotubes_OG12 | 66062 | FTMS; HCD | 42.35 | 1161.17 | Cspp1      |

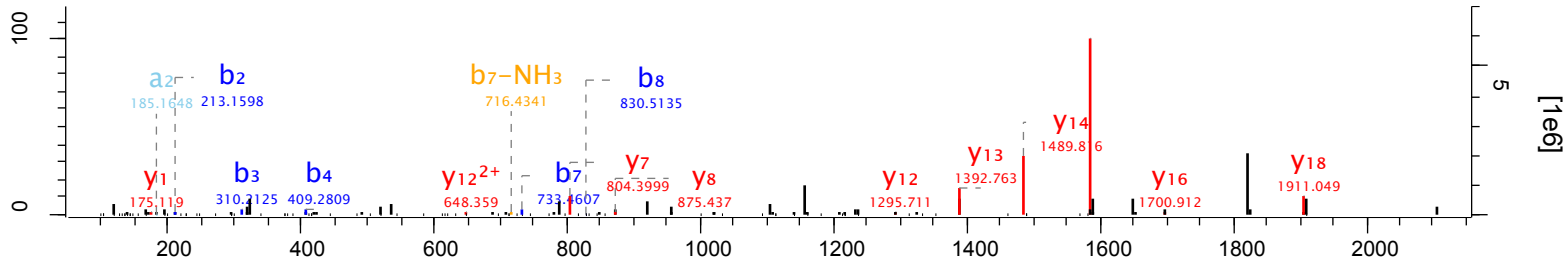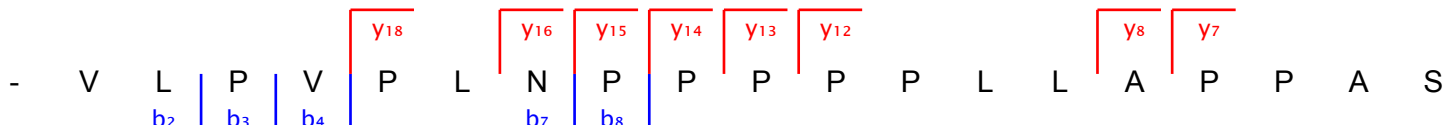

| Raw file                                  | Scan  | Method    | Score  | m/z    | Gene names |
|-------------------------------------------|-------|-----------|--------|--------|------------|
| 20121213_EXQ1_AtDe_50CM_LFQ_myotubes_OG12 | 66403 | FTMS; HCD | 196.18 | 718.95 | Slc36a4    |

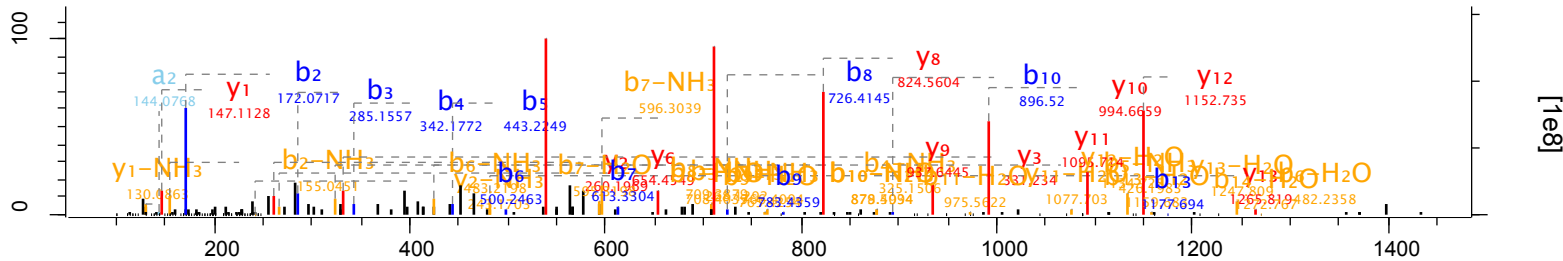

| Raw file                                  | Scan  | Method    | Score | m/z    | Gene names |
|-------------------------------------------|-------|-----------|-------|--------|------------|
| 20121213_EXQ1_AtDe_50CM_LFQ_myotubes_OG12 | 67508 | FTMS; HCD | 73.63 | 694.42 | Herc6      |

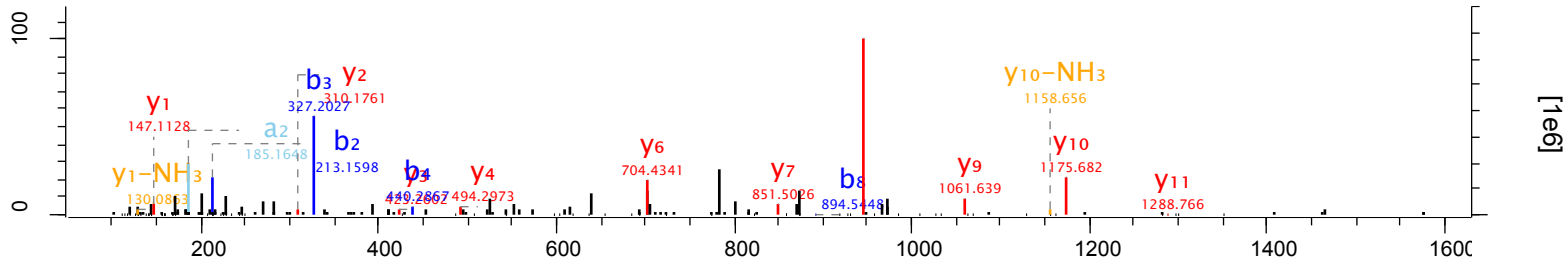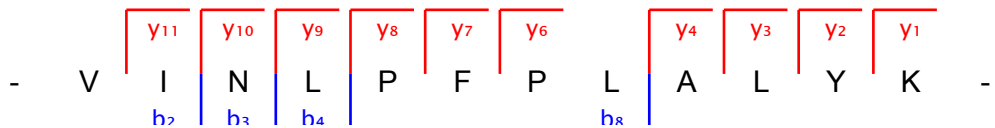

| Raw file                                  | Scan  | Method    | Score  | m/z | Gene names |
|-------------------------------------------|-------|-----------|--------|-----|------------|
| 20121213_EXQ1_AtDe_50CM_LFQ_myotubes_OG12 | 68608 | FTMS; HCD | 130.27 | 853 | Gemin7     |

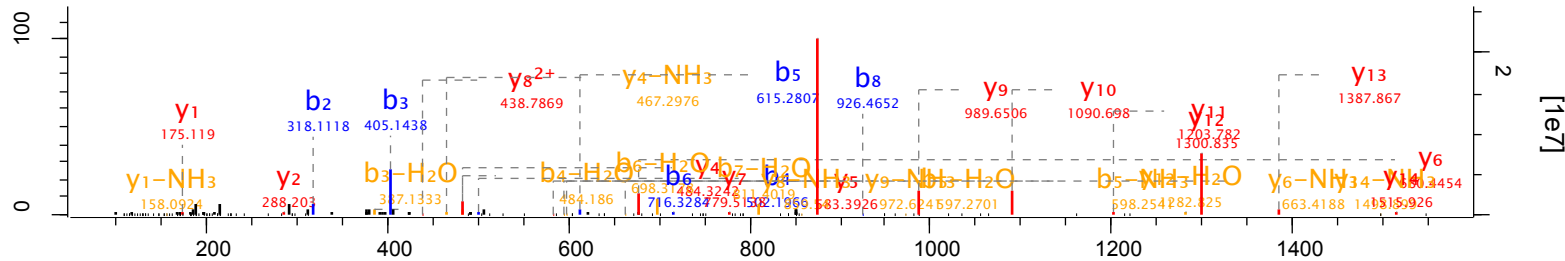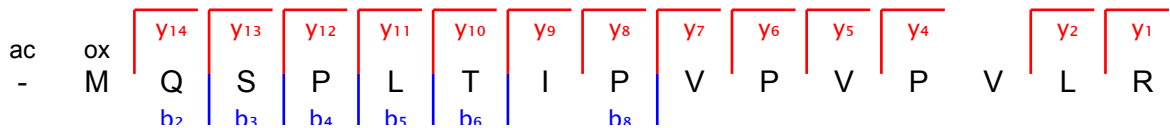



| Raw file                                 | Scan  | Method    | Score | m/z    | Gene names |
|------------------------------------------|-------|-----------|-------|--------|------------|
| 20121213_EXQ1_AtDe_50CM_LFQ_myotubes_OG2 | 12373 | FTMS; HCD | 71.69 | 651.62 | Ing1       |

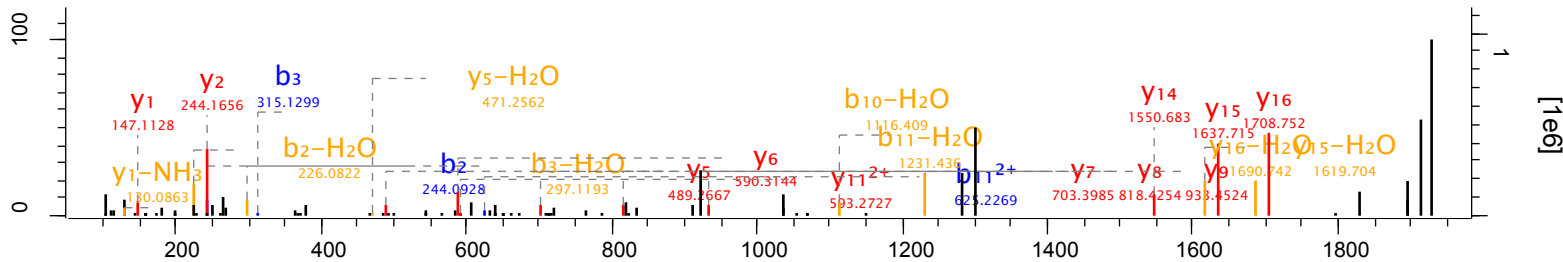

Sequence: - E N A S N N H D H D D I T S G T P K -

Fragmentation mapping (b-ions in blue, y-ions in red):

- b<sub>2</sub> (blue) covers residues N, A, S, N, N, H, D, H, D, D, I, T, S, G, T, P, K.
- b<sub>3</sub> (blue) covers residues A, S, N, N, H, D, H, D, D, I, T, S, G, T, P, K.
- b<sub>11</sub><sup>2+</sup> (blue) covers residues D, D, I, T, S, G, T, P, K.
- y<sub>16</sub> (red) covers residues A, S, N, N, H, D, H, D, D, I, T, S, G, T, P, K.
- y<sub>15</sub> (red) covers residues S, N, N, H, D, H, D, D, I, T, S, G, T, P, K.
- y<sub>14</sub> (red) covers residues N, N, H, D, H, D, D, I, T, S, G, T, P, K.
- y<sub>11</sub><sup>2+</sup> (red) covers residues D, H, D, D, I, T, S, G, T, P, K.
- y<sub>9</sub> (red) covers residues D, D, I, T, S, G, T, P, K.
- y<sub>8</sub> (red) covers residues D, D, I, T, S, G, T, P, K.
- y<sub>7</sub> (red) covers residues I, T, S, G, T, P, K.
- y<sub>6</sub> (red) covers residues T, S, G, T, P, K.
- y<sub>5</sub> (red) covers residues S, G, T, P, K.
- y<sub>2</sub> (red) covers residues P, K.
- y<sub>1</sub> (red) covers residue K.



| Raw file                                 | Scan  | Method    | Score | m/z    | Gene names |
|------------------------------------------|-------|-----------|-------|--------|------------|
| 20121213_EXQ1_AtDe_50CM_LFQ_myotubes_OG2 | 14976 | FTMS; HCD | 97.97 | 654.31 | Trim75     |

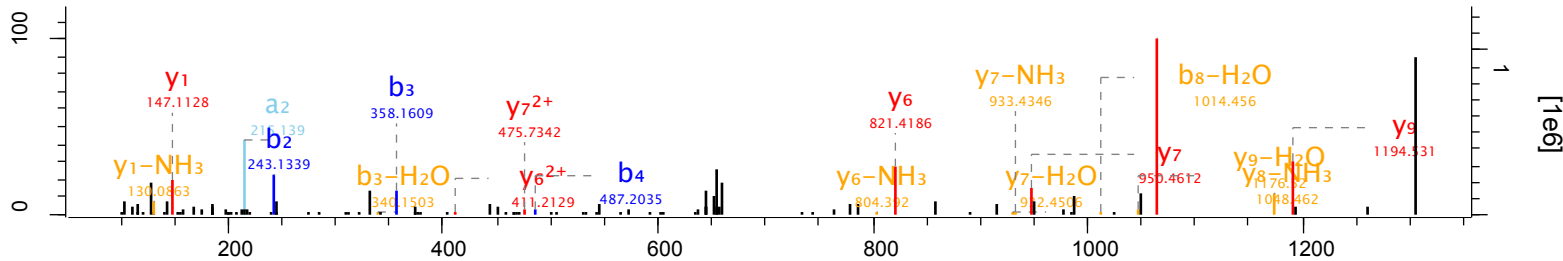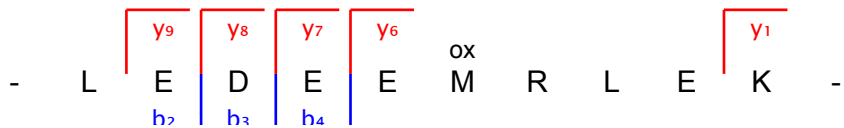

Raw file

20121213\_EXQ1\_AtDe\_50CM\_LFQ\_myotubes\_OG2

Scan

22383

Method

FTMS; HCD

Score

123.67

m/z

608.3

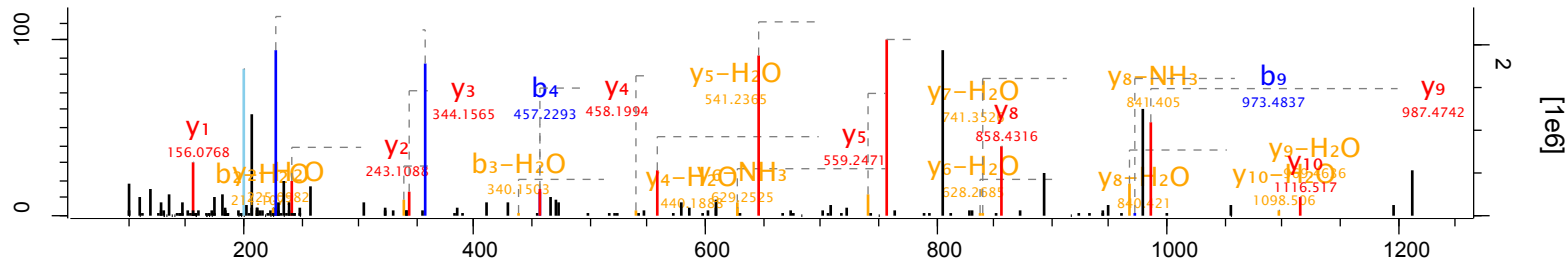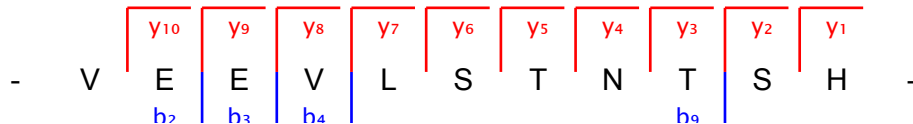

| Raw file                                 | Scan  | Method    | Score | m/z    | Gene names |
|------------------------------------------|-------|-----------|-------|--------|------------|
| 20121213_EXQ1_AtDe_50CM_LFQ_myotubes_OG2 | 24461 | FTMS; HCD | 105.4 | 672.85 | Slc29a2    |

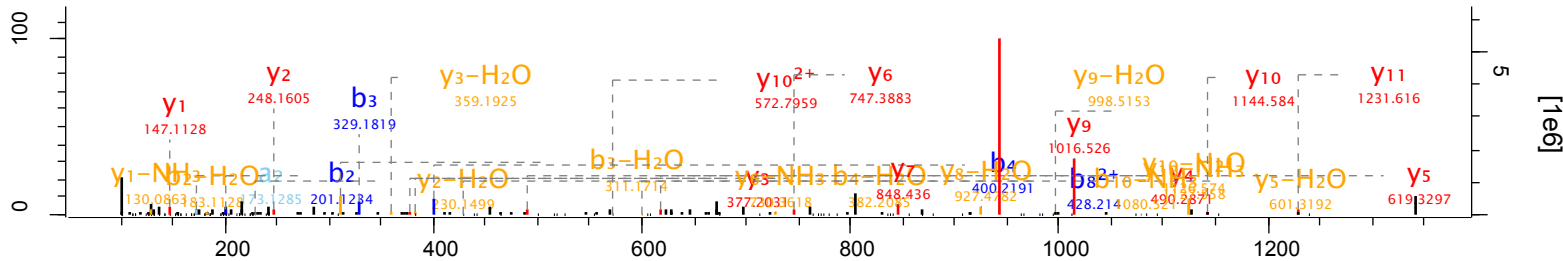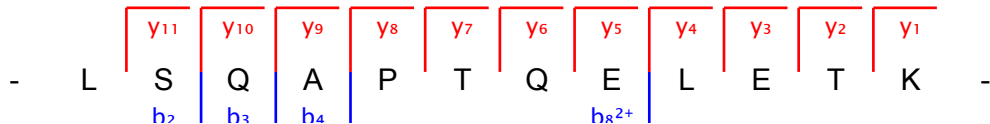

Raw file

20121213\_EXQ1\_AtDe\_50CM\_LFQ\_myotubes\_OG2

Scan

26311

Method

FTMS; HCD

Score

75.76

m/z

846.87

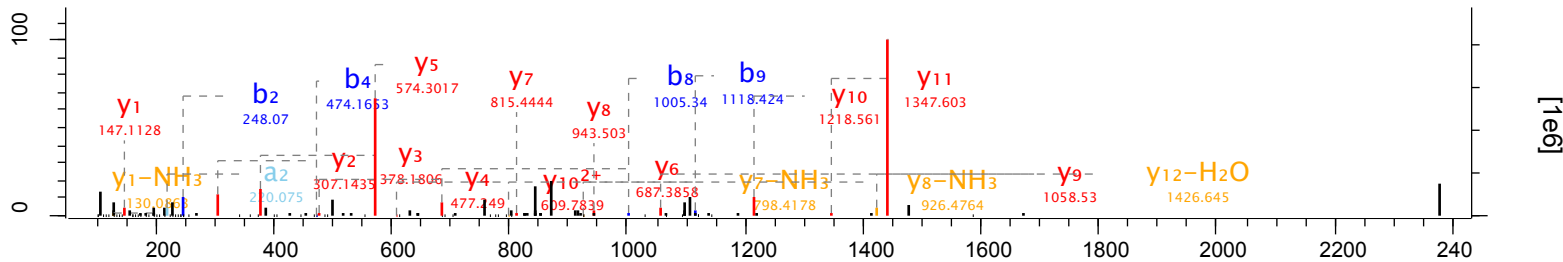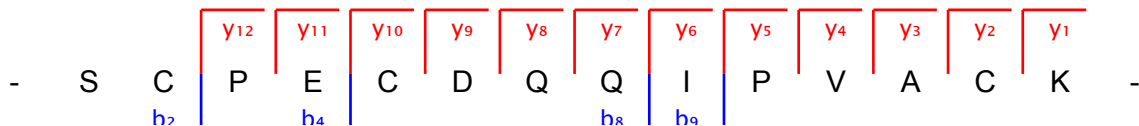

| Raw file                                 | Scan  | Method    | Score  | m/z    | Gene names |
|------------------------------------------|-------|-----------|--------|--------|------------|
| 20121213_EXQ1_AtDe_50CM_LFQ_myotubes_OG2 | 28534 | FTMS; HCD | 103.87 | 483.72 | Tmem258    |

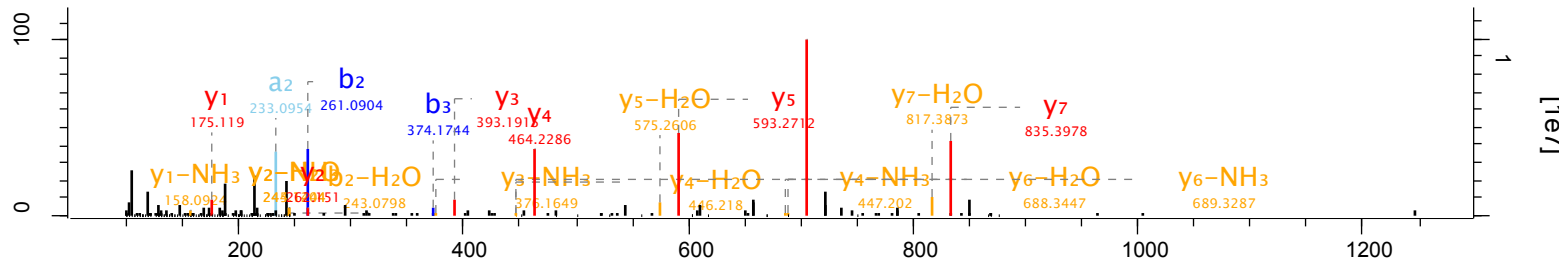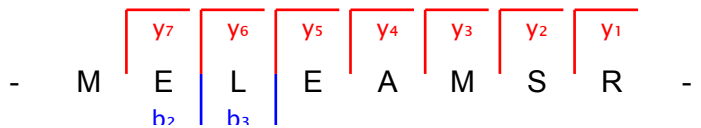

| Raw file                                 | Scan  | Method    | Score | m/z    | Gene names |
|------------------------------------------|-------|-----------|-------|--------|------------|
| 20121213_EXQ1_AtDe_50CM_LFQ_myotubes_OG2 | 28574 | FTMS; HCD | 76.22 | 491.72 | Tmem258    |

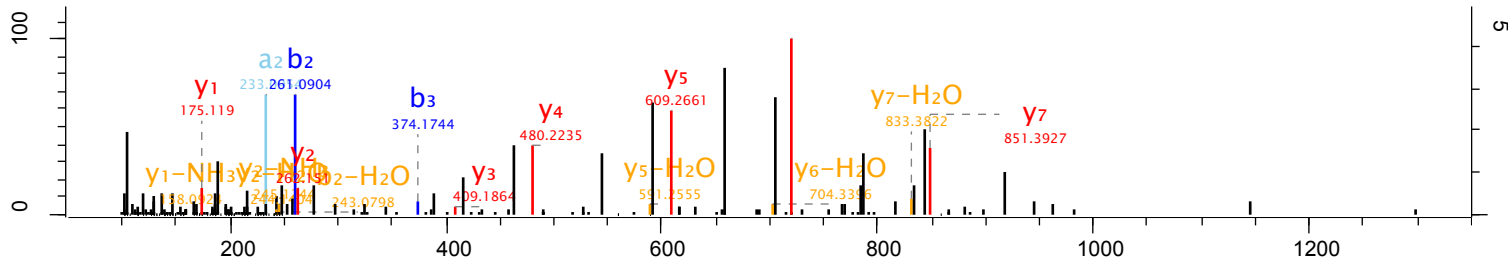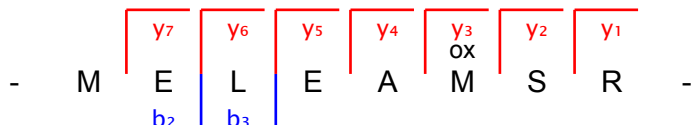



| Raw file                                 | Scan  | Method    | Score  | m/z    | Gene names |
|------------------------------------------|-------|-----------|--------|--------|------------|
| 20121213_EXQ1_AtDe_50CM_LFQ_myotubes_OG2 | 31498 | FTMS; HCD | 140.45 | 557.81 | Agbl2      |

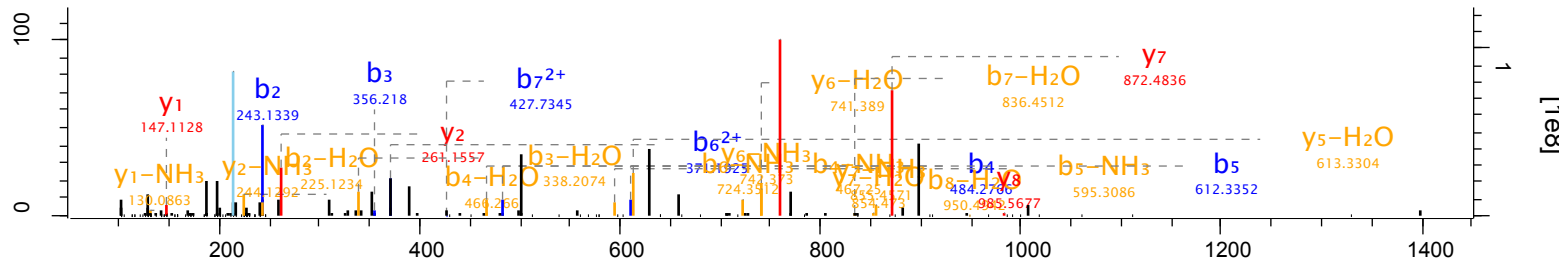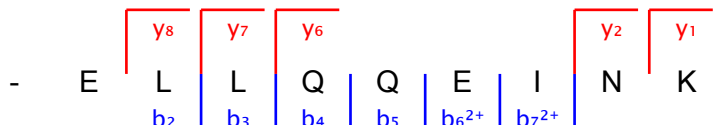

| Raw file                                 | Scan  | Method    | Score  | m/z    | Gene names   |
|------------------------------------------|-------|-----------|--------|--------|--------------|
| 20121213_EXQ1_AtDe_50CM_LFQ_myotubes_OG2 | 33919 | FTMS; HCD | 105.28 | 836.36 | mt-Nd3;Mtnd3 |

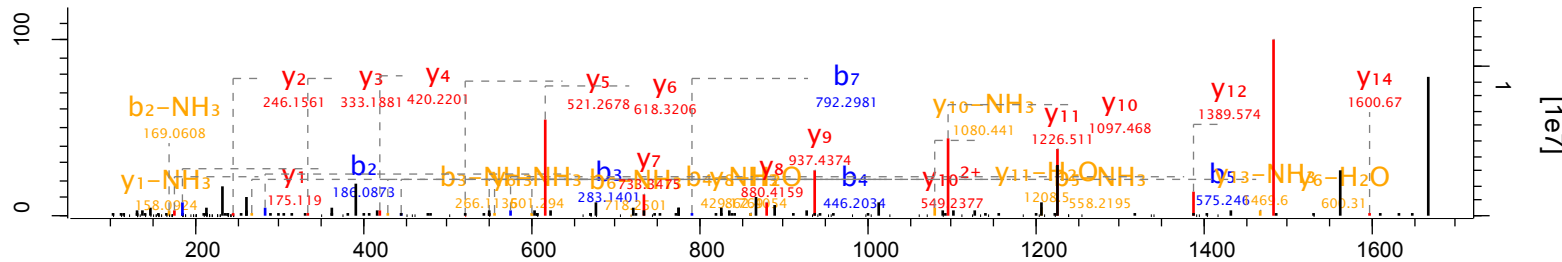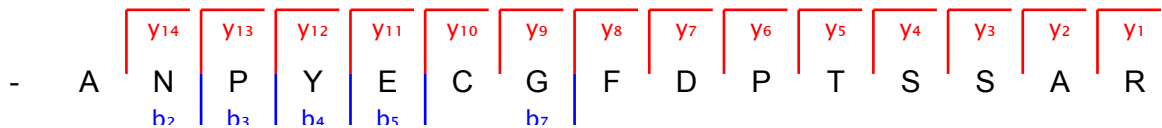

| Raw file                                 | Scan  | Method    | Score | m/z    | Gene names |
|------------------------------------------|-------|-----------|-------|--------|------------|
| 20121213_EXQ1_AtDe_50CM_LFQ_myotubes_OG2 | 35258 | FTMS; HCD | 117.1 | 476.24 | Mapk15     |

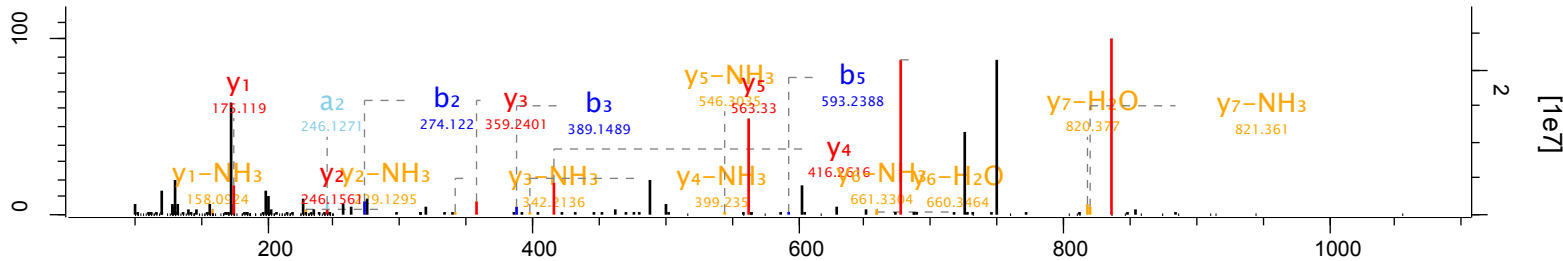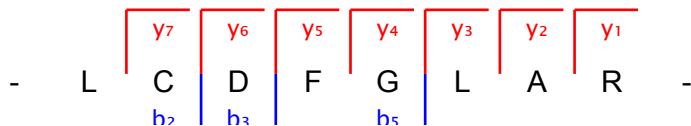

| Raw file                                 | Scan  | Method    | Score | m/z    | Gene names |
|------------------------------------------|-------|-----------|-------|--------|------------|
| 20121213_EXQ1_AtDe_50CM_LFQ_myotubes_OG2 | 38543 | FTMS; HCD | 95.95 | 625.98 | Fam57a     |

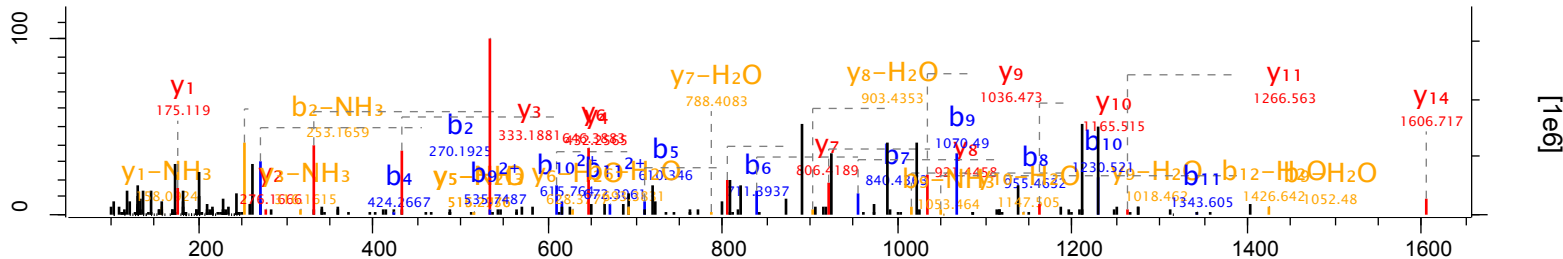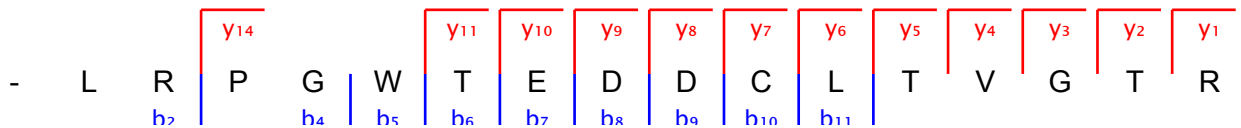

| Raw file                                 | Scan  | Method    | Score | m/z    | Gene names |
|------------------------------------------|-------|-----------|-------|--------|------------|
| 20121213_EXQ1_AtDe_50CM_LFQ_myotubes_OG2 | 39717 | FTMS; HCD | 71.4  | 925.94 | Bcl7b      |

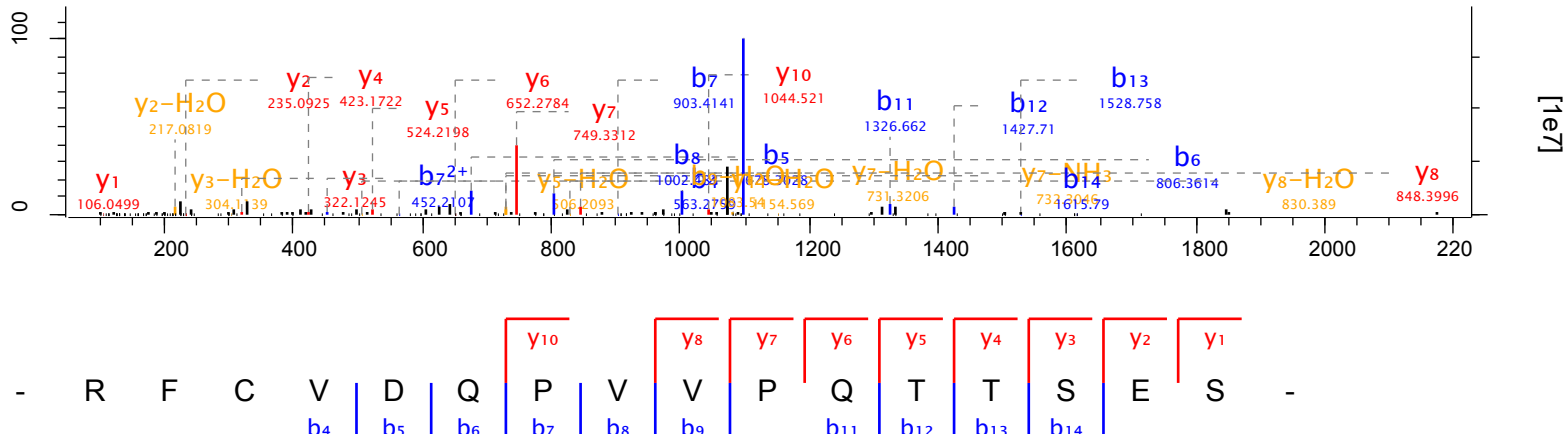

| Raw file                                 | Scan  | Method    | Score | m/z    | Gene names |
|------------------------------------------|-------|-----------|-------|--------|------------|
| 20121213_EXQ1_AtDe_50CM_LFQ_myotubes_OG2 | 40777 | FTMS; HCD | 97.43 | 504.76 | Sept3      |

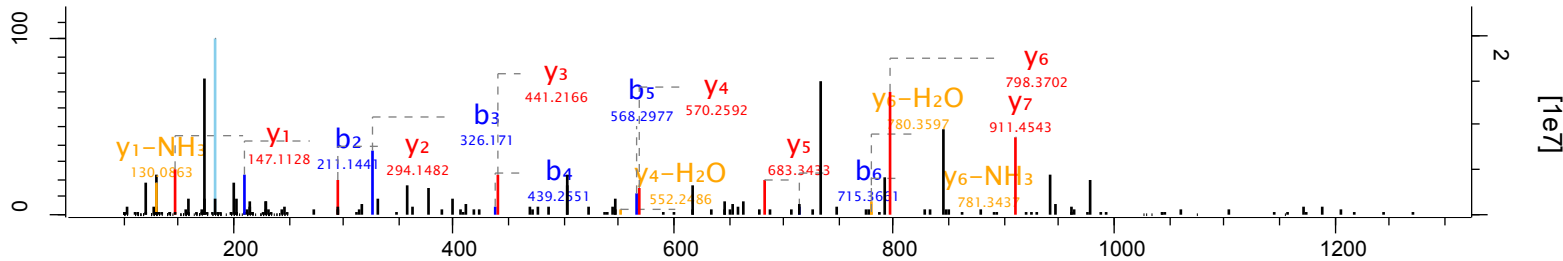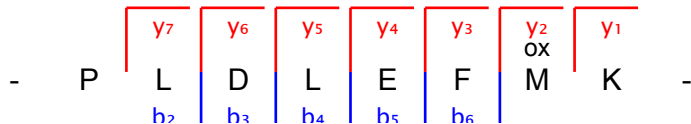

| Raw file                                 | Scan  | Method    | Score  | m/z    | Gene names |
|------------------------------------------|-------|-----------|--------|--------|------------|
| 20121213_EXQ1_AtDe_50CM_LFQ_myotubes_OG2 | 42980 | FTMS; HCD | 115.82 | 557.33 | Mis12      |

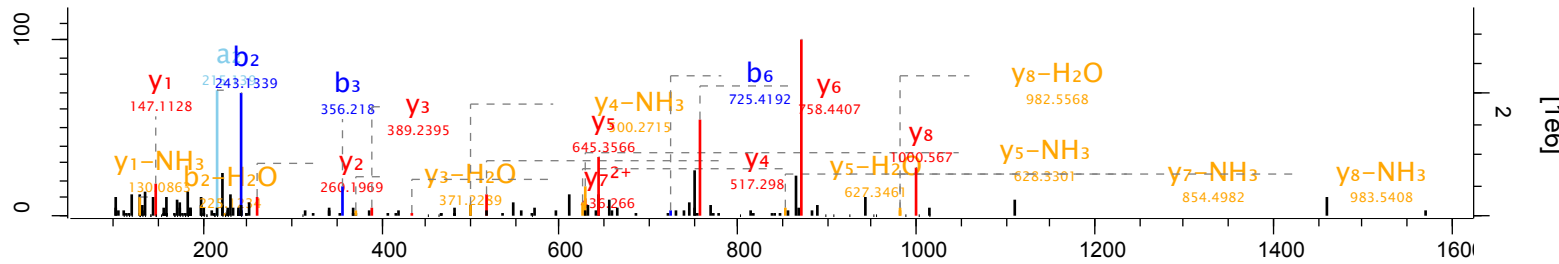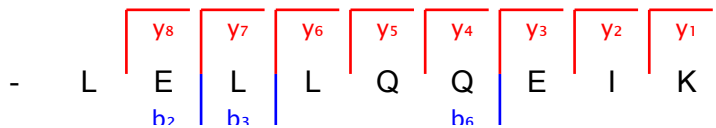

| Raw file                                 | Scan  | Method    | Score | m/z   | Gene names    |
|------------------------------------------|-------|-----------|-------|-------|---------------|
| 20121213_EXQ1_AtDe_50CM_LFQ_myotubes_OG2 | 43931 | FTMS; HCD | 92.27 | 715.4 | 1810009A15Rik |

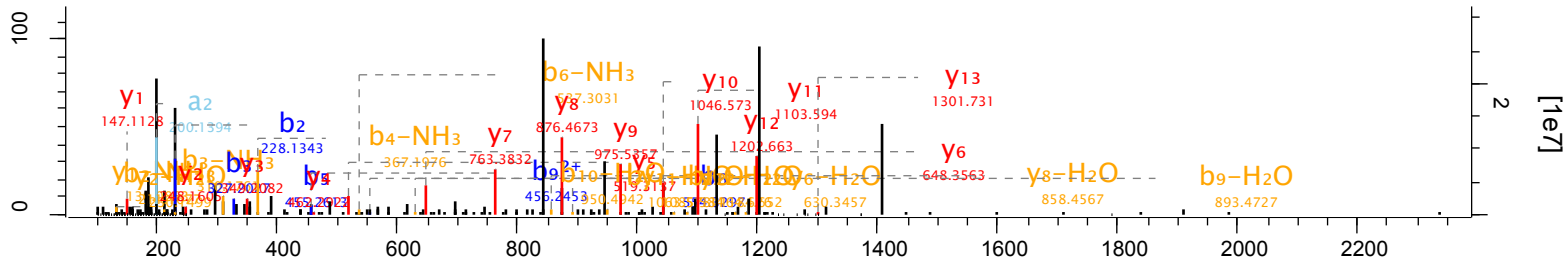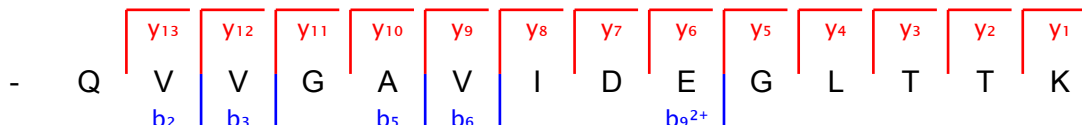



| Raw file                                 | Scan  | Method    | Score  | m/z   | Gene names |
|------------------------------------------|-------|-----------|--------|-------|------------|
| 20121213_EXQ1_AtDe_50CM_LFQ_myotubes_OG2 | 44881 | FTMS; HCD | 130.98 | 635.8 | Gcsh       |

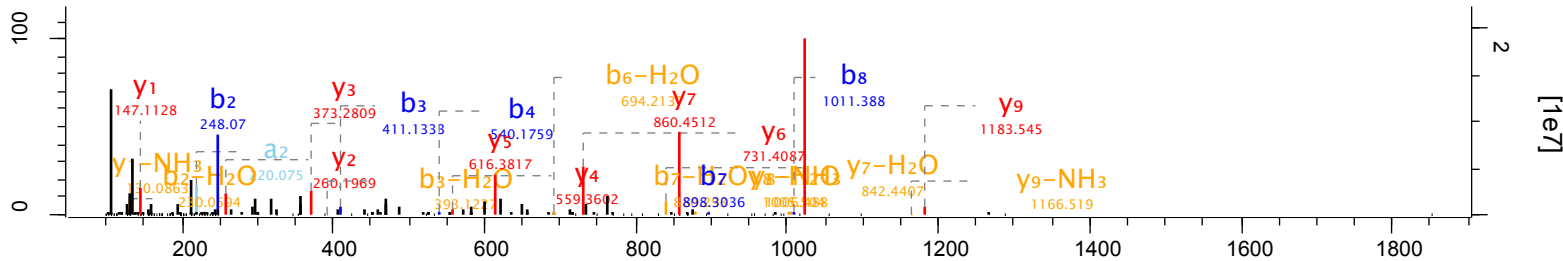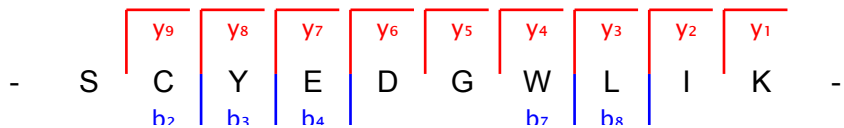

| Raw file                                 | Scan  | Method    | Score  | m/z     | Gene names |
|------------------------------------------|-------|-----------|--------|---------|------------|
| 20121213_EXQ1_AtDe_50CM_LFQ_myotubes_OG2 | 49157 | FTMS; HCD | 186.13 | 1221.12 | Tmem42     |

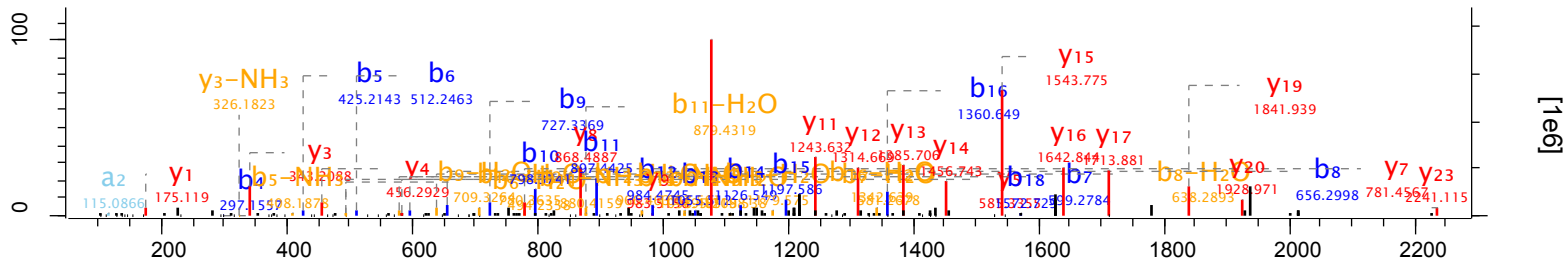

- A A | G P | Q | S S | G | A A | V | S | A | A | A | Y | P | D | S

a<sub>2</sub> | b<sub>4</sub> | b<sub>5</sub> | b<sub>6</sub> | b<sub>7</sub> | b<sub>8</sub> | b<sub>9</sub> | b<sub>10</sub> | b<sub>11</sub> | b<sub>12</sub> | b<sub>13</sub> | b<sub>14</sub> | b<sub>15</sub> | b<sub>16</sub> | b<sub>18</sub>

y<sub>23</sub> | y<sub>20</sub> | y<sub>19</sub> | y<sub>17</sub> | y<sub>16</sub> | y<sub>15</sub> | y<sub>14</sub> | y<sub>13</sub> | y<sub>12</sub> | y<sub>11</sub> | y<sub>10</sub> | y<sub>9</sub> | y<sub>8</sub>

| Raw file                                 | Scan  | Method    | Score  | m/z    | Gene names |
|------------------------------------------|-------|-----------|--------|--------|------------|
| 20121213_EXQ1_AtDe_50CM_LFQ_myotubes_OG2 | 49820 | FTMS; HCD | 104.26 | 729.42 | Zcchc10    |

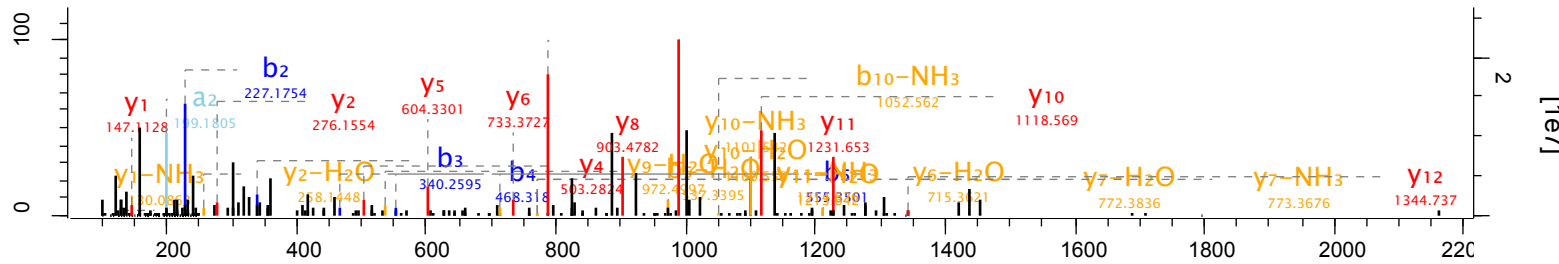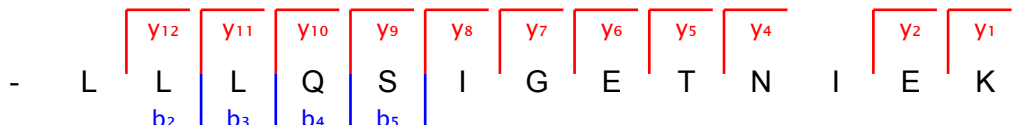

| Raw file                                 | Scan  | Method    | Score | m/z    | Gene names |
|------------------------------------------|-------|-----------|-------|--------|------------|
| 20121213_EXQ1_AtDe_50CM_LFQ_myotubes_OG2 | 50603 | FTMS; HCD | 75.74 | 596.34 | Pole4      |

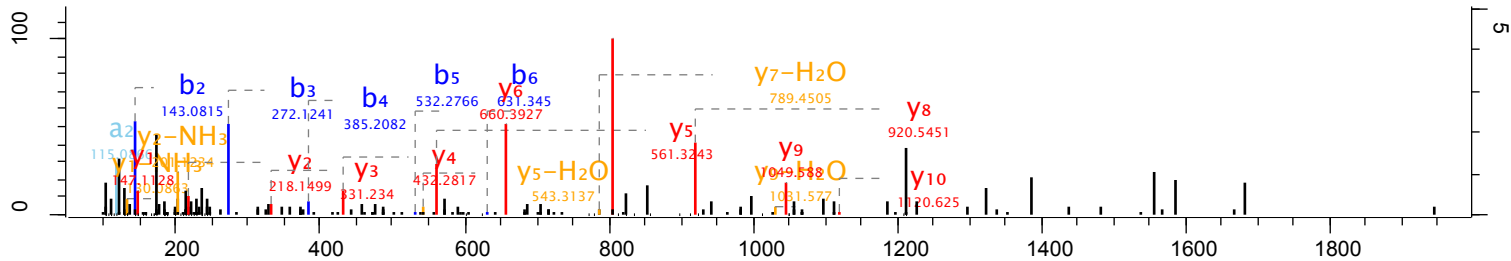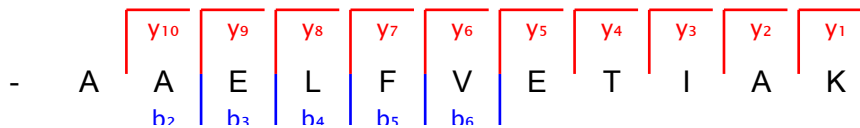

| Raw file                                 | Scan  | Method    | Score  | m/z   | Gene names |
|------------------------------------------|-------|-----------|--------|-------|------------|
| 20121213_EXQ1_AtDe_50CM_LFQ_myotubes_OG2 | 52060 | FTMS; HCD | 108.71 | 937.5 | Chrac1     |

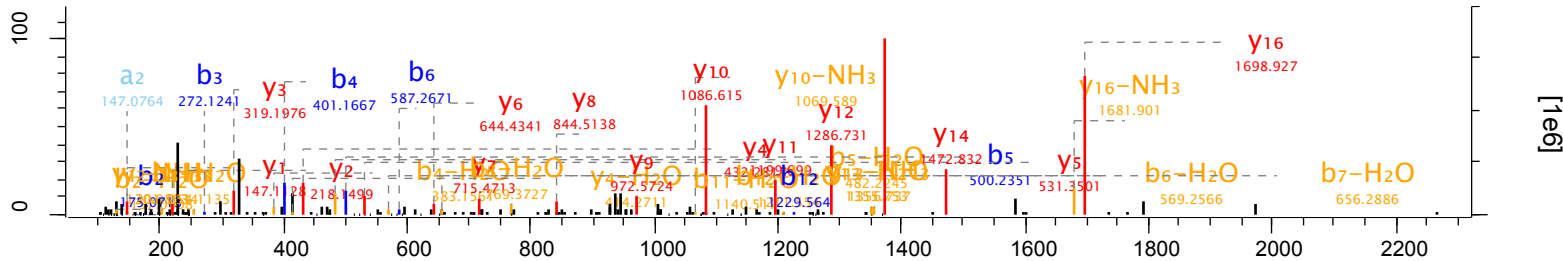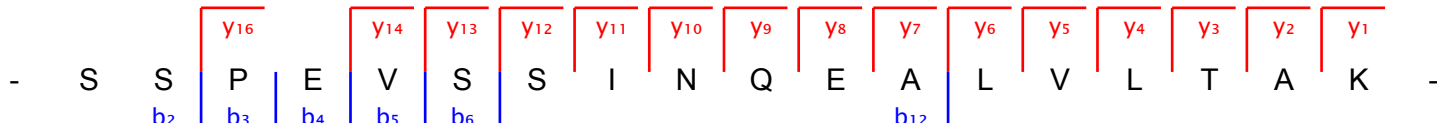

| Raw file                                 | Scan  | Method    | Score  | m/z    | Gene names |
|------------------------------------------|-------|-----------|--------|--------|------------|
| 20121213_EXQ1_AtDe_50CM_LFQ_myotubes_OG2 | 52076 | FTMS; HCD | 135.83 | 496.76 | Sept3      |

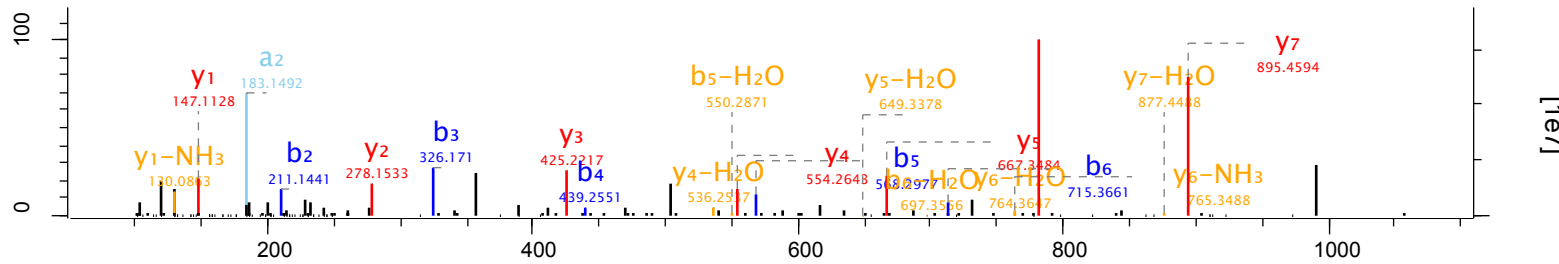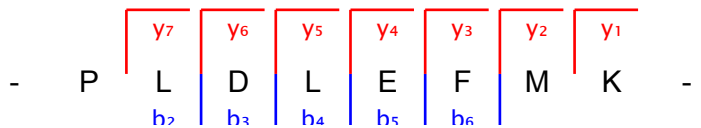

| Raw file                                 | Scan  | Method    | Score  | m/z    | Gene names |
|------------------------------------------|-------|-----------|--------|--------|------------|
| 20121213_EXQ1_AtDe_50CM_LFQ_myotubes_OG2 | 52132 | FTMS; HCD | 109.11 | 504.76 | Sept3      |

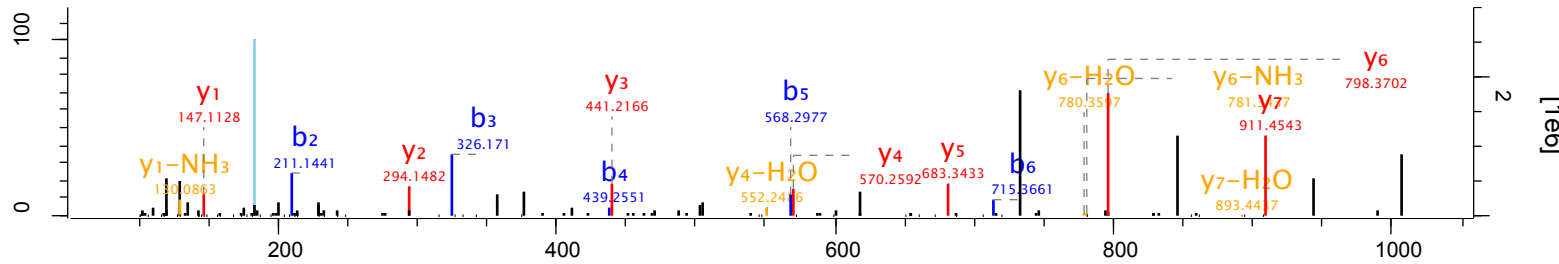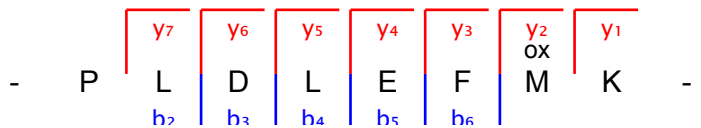

| Raw file                                 | Scan  | Method    | Score  | m/z    | Gene names |
|------------------------------------------|-------|-----------|--------|--------|------------|
| 20121213_EXQ1_AtDe_50CM_LFQ_myotubes_OG2 | 52488 | FTMS; HCD | 143.28 | 496.76 | Sept3      |

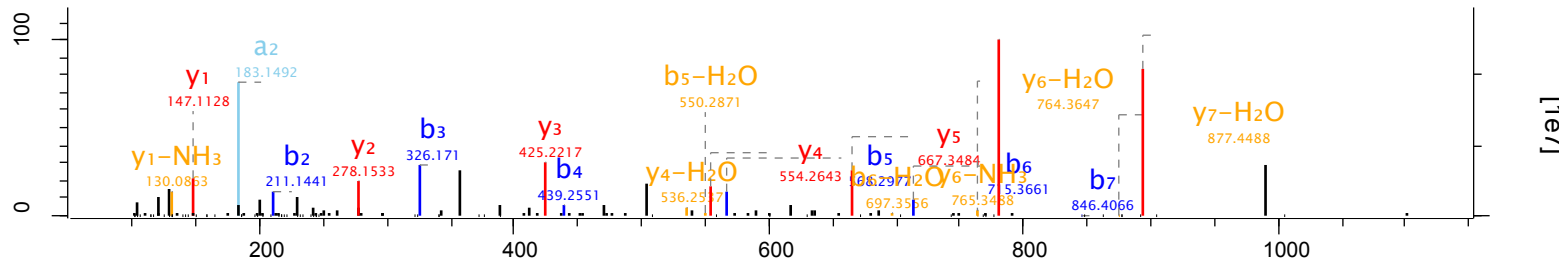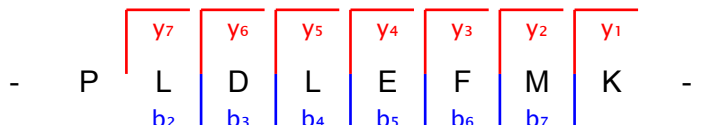



| Raw file                                 | Scan  | Method    | Score | m/z    | Gene names |
|------------------------------------------|-------|-----------|-------|--------|------------|
| 20121213_EXQ1_AtDe_50CM_LFQ_myotubes_OG2 | 53132 | FTMS; HCD | 59.71 | 801.91 | Smoc1      |

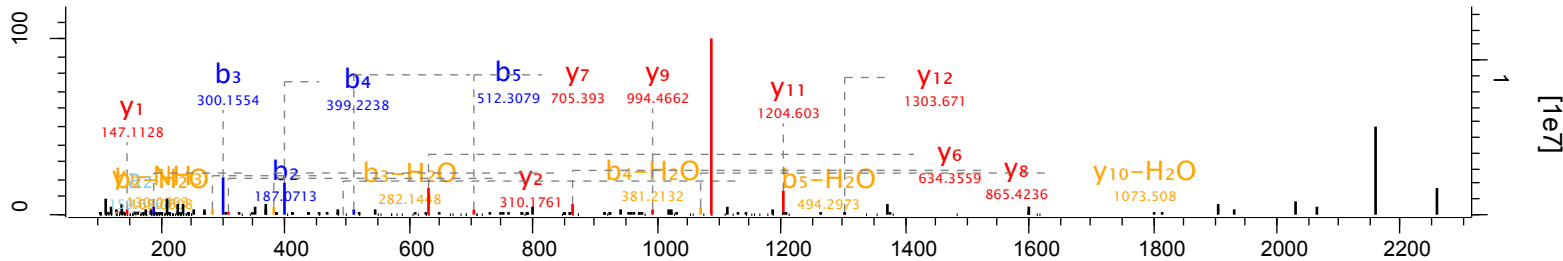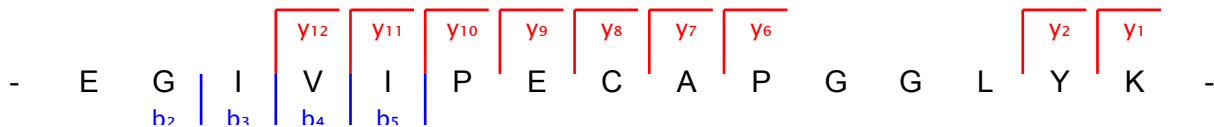

| Raw file                                 | Scan  | Method    | Score  | m/z    | Gene names |
|------------------------------------------|-------|-----------|--------|--------|------------|
| 20121213_EXQ1_AtDe_50CM_LFQ_myotubes_OG2 | 53678 | FTMS; HCD | 114.72 | 768.36 | Nmrk1      |

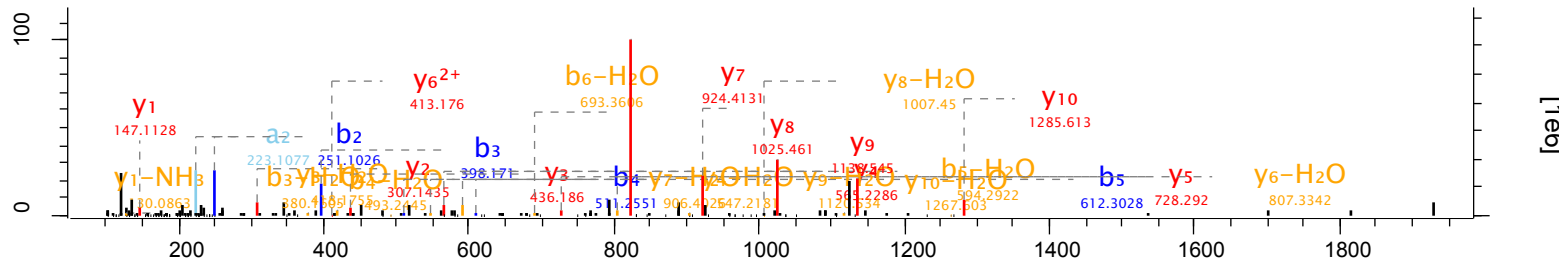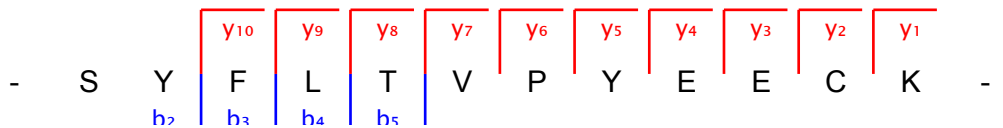

| Raw file                                 | Scan  | Method    | Score  | m/z     | Gene names |
|------------------------------------------|-------|-----------|--------|---------|------------|
| 20121213_EXQ1_AtDe_50CM_LFQ_myotubes_OG2 | 53804 | FTMS; HCD | 164.89 | 1081.54 | Cstf1      |

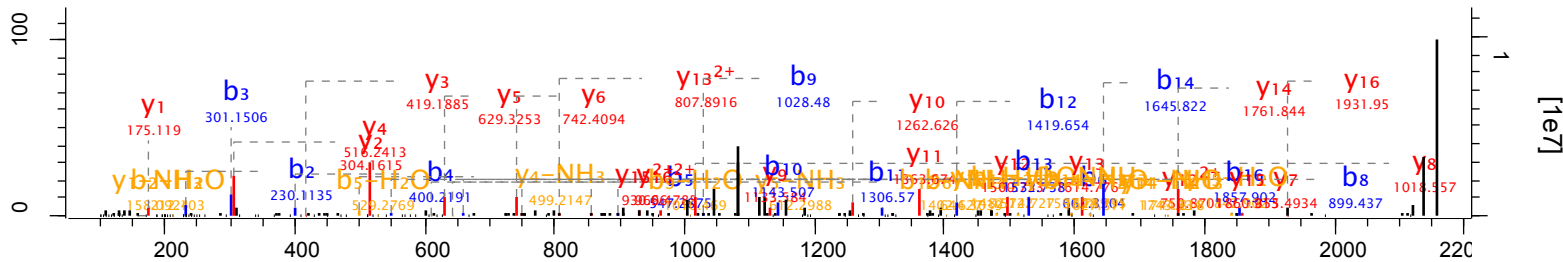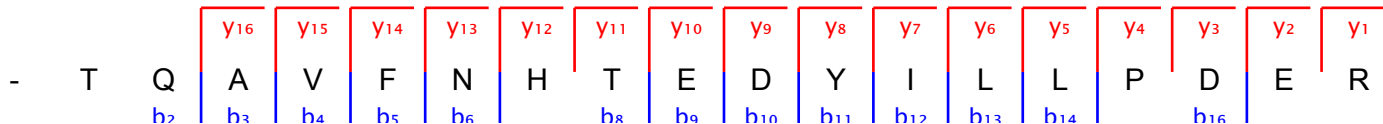

| Raw file                                 | Scan  | Method    | Score  | m/z    | Gene names |
|------------------------------------------|-------|-----------|--------|--------|------------|
| 20121213_EXQ1_AtDe_50CM_LFQ_myotubes_OG2 | 55128 | FTMS; HCD | 129.01 | 878.97 | Colq       |

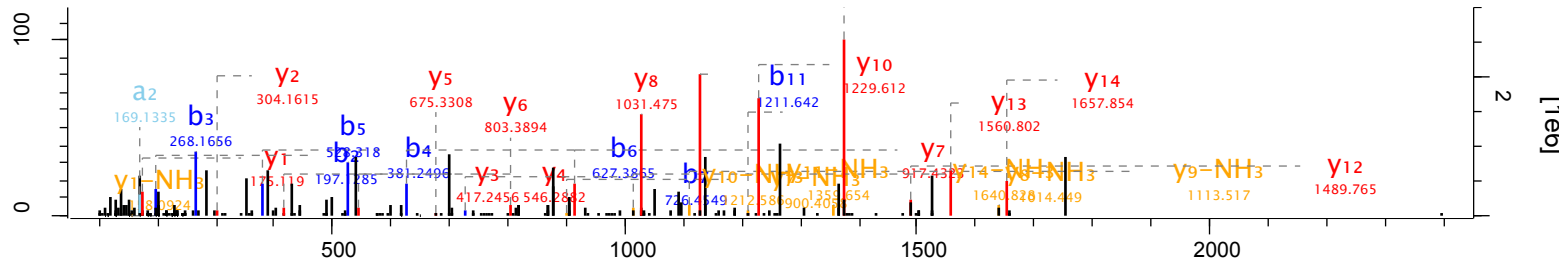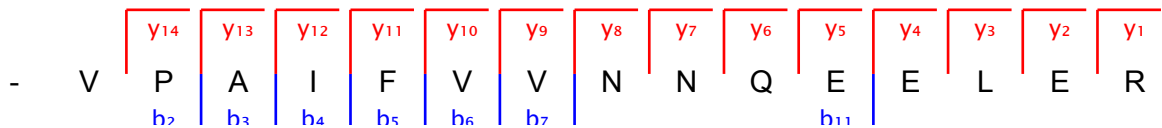

| Raw file                                 | Scan  | Method    | Score  | m/z    | Gene names |
|------------------------------------------|-------|-----------|--------|--------|------------|
| 20121213_EXQ1_AtDe_50CM_LFQ_myotubes_OG2 | 59464 | FTMS; HCD | 142.91 | 972.96 | Ptn        |

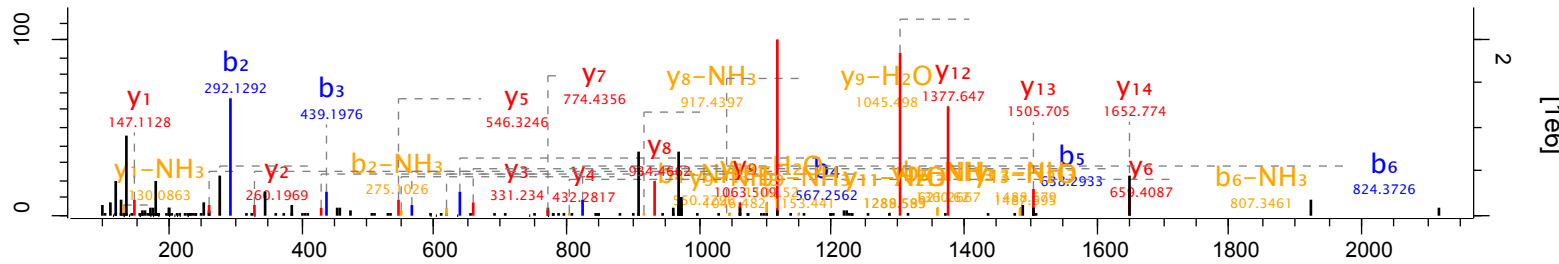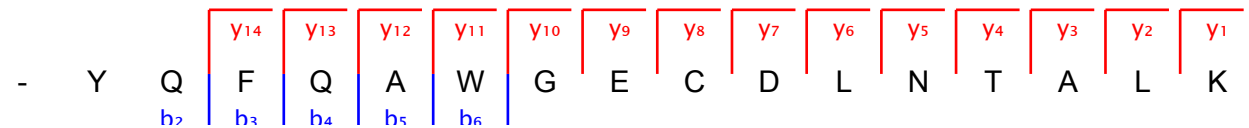

| Raw file                                 | Scan  | Method    | Score  | m/z    | Gene names |
|------------------------------------------|-------|-----------|--------|--------|------------|
| 20121213_EXQ1_AtDe_50CM_LFQ_myotubes_OG2 | 63225 | FTMS; HCD | 122.64 | 750.44 | Lurap11    |

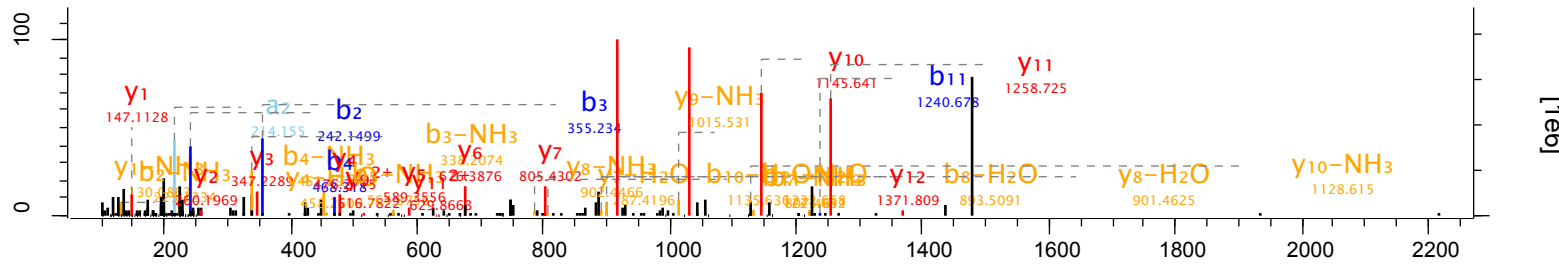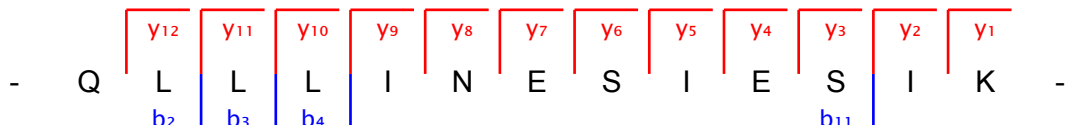

| Raw file                                 | Scan  | Method    | Score | m/z   | Gene names |
|------------------------------------------|-------|-----------|-------|-------|------------|
| 20121213_EXQ1_AtDe_50CM_LFQ_myotubes_OG2 | 63270 | FTMS; HCD | 73.69 | 979.5 | Arl4c      |

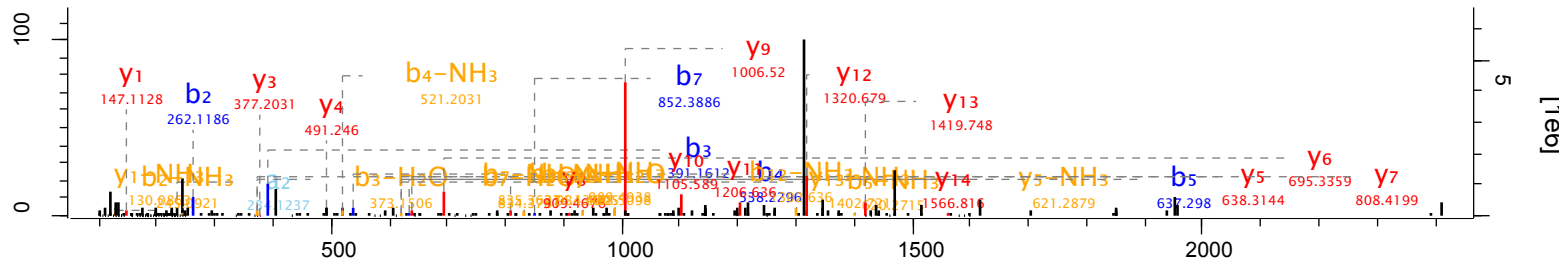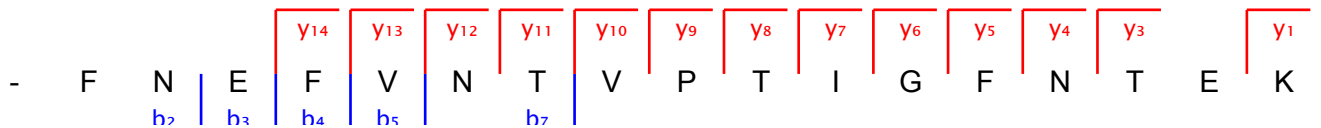

| Raw file                                 | Scan  | Method    | Score  | m/z    | Gene names |
|------------------------------------------|-------|-----------|--------|--------|------------|
| 20121213_EXQ1_AtDe_50CM_LFQ_myotubes_OG2 | 63501 | FTMS; HCD | 175.26 | 660.67 | Zfp444     |

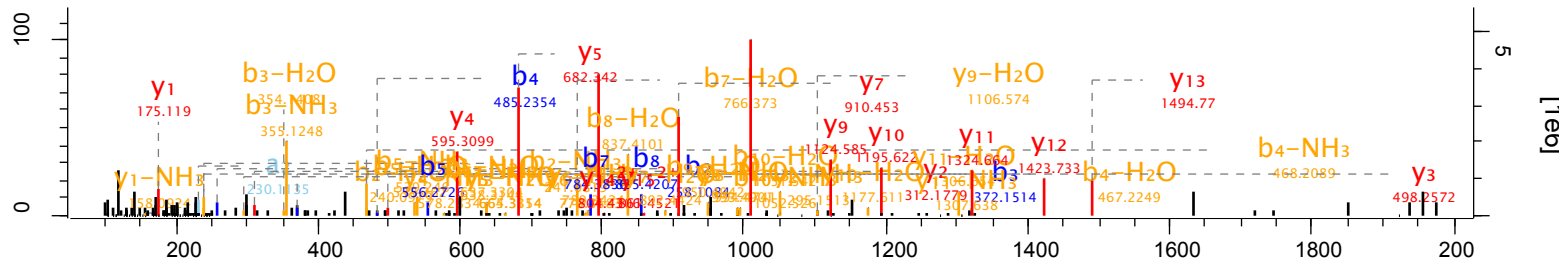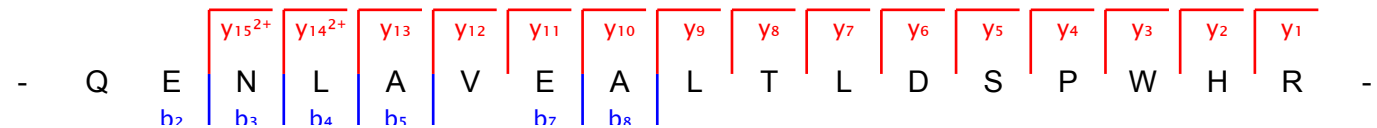



| Raw file                                 | Scan  | Method    | Score  | m/z    | Gene names |
|------------------------------------------|-------|-----------|--------|--------|------------|
| 20121213_EXQ1_AtDe_50CM_LFQ_myotubes_OG2 | 63653 | FTMS; HCD | 161.08 | 719.35 | Ncbp1      |

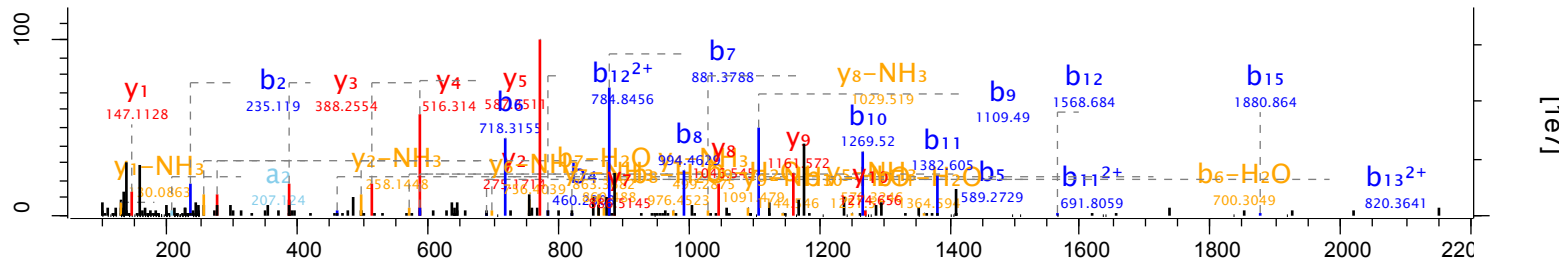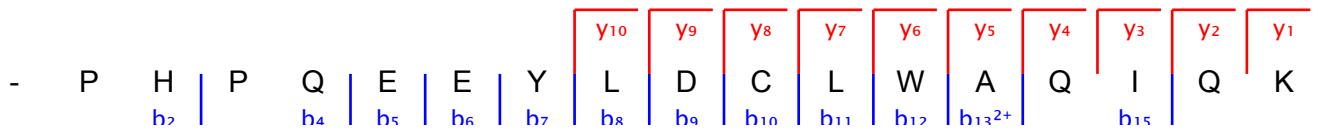

| Raw file                                 | Scan  | Method    | Score  | m/z     | Gene names |
|------------------------------------------|-------|-----------|--------|---------|------------|
| 20121213_EXQ1_AtDe_50CM_LFQ_myotubes_OG2 | 66855 | FTMS; HCD | 140.73 | 1215.61 | Ly6a       |

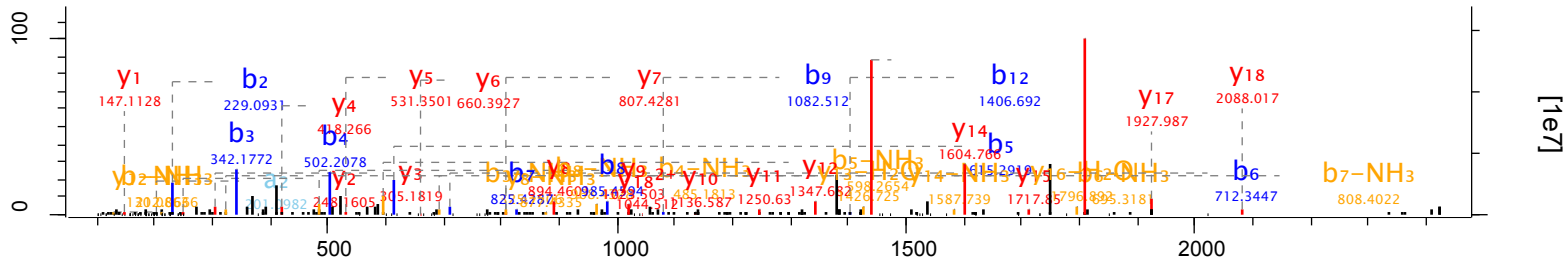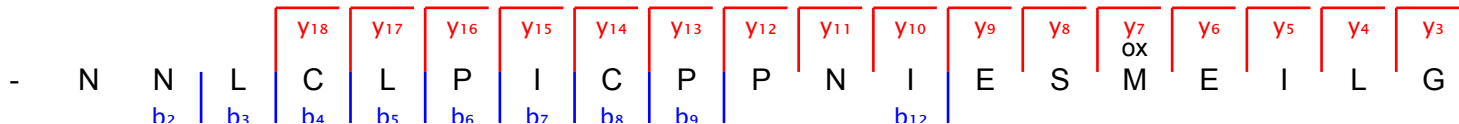

| Raw file                                 | Scan  | Method    | Score  | m/z     | Gene names |
|------------------------------------------|-------|-----------|--------|---------|------------|
| 20121213_EXQ1_AtDe_50CM_LFQ_myotubes_OG2 | 67009 | FTMS; HCD | 278.67 | 1161.92 | Mrpl52     |

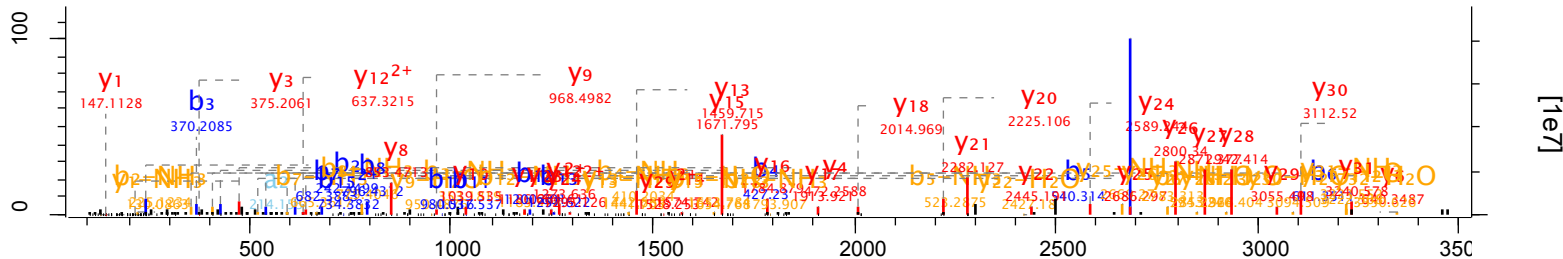

|   |   |                 |                 |                 |                 |                 |                 |                 |                 |                               |                 |                 |                 |                               |                 |                 |                 |                 |   |
|---|---|-----------------|-----------------|-----------------|-----------------|-----------------|-----------------|-----------------|-----------------|-------------------------------|-----------------|-----------------|-----------------|-------------------------------|-----------------|-----------------|-----------------|-----------------|---|
| - | L | Q               | Q               | G               | L               | A               | A               | N               | P               | S                             | G               | Y               | G               | P                             | L               | T               | E               | L               | P |
|   |   | b <sub>2</sub>  | b <sub>3</sub>  | b <sub>4</sub>  | b <sub>5</sub>  | b <sub>6</sub>  | b <sub>7</sub>  | b <sub>8</sub>  |                 | b <sub>10</sub>               | b <sub>11</sub> | b <sub>12</sub> | b <sub>13</sub> | b <sub>15</sub> <sup>2+</sup> |                 |                 |                 |                 |   |
|   |   | y <sub>31</sub> | y <sub>30</sub> | y <sub>29</sub> | y <sub>28</sub> | y <sub>27</sub> | y <sub>26</sub> | y <sub>25</sub> | y <sub>24</sub> | y <sub>23</sub> <sup>2+</sup> | y <sub>22</sub> | y <sub>21</sub> | y <sub>20</sub> |                               | y <sub>18</sub> | y <sub>17</sub> | y <sub>16</sub> | y <sub>15</sub> |   |

| Raw file                                 | Scan  | Method    | Score  | m/z    | Gene names |
|------------------------------------------|-------|-----------|--------|--------|------------|
| 20121213_EXQ1_AtDe_50CM_LFQ_myotubes_OG2 | 68457 | FTMS; HCD | 194.37 | 698.39 | Scoc       |

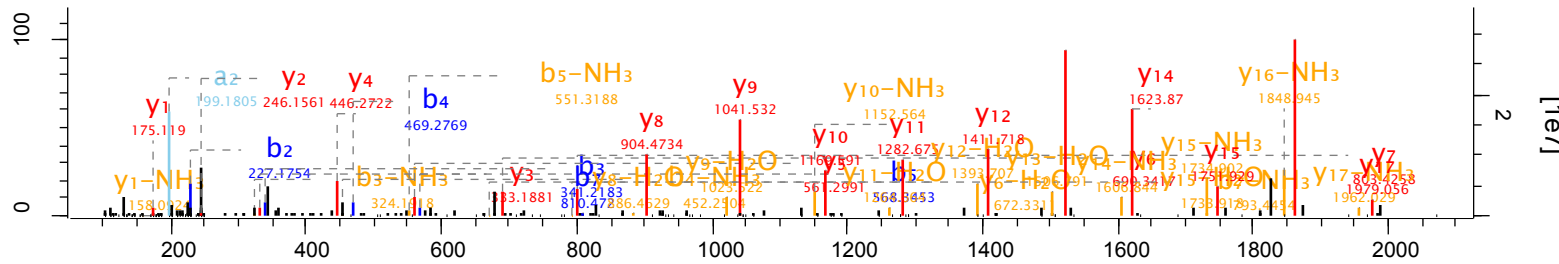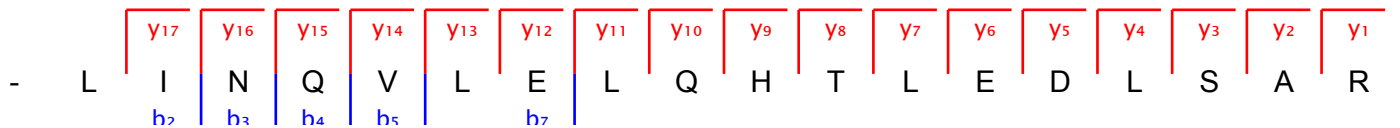

| Raw file                                 | Scan  | Method    | Score | m/z    | Gene names |
|------------------------------------------|-------|-----------|-------|--------|------------|
| 20121213_EXQ1_AtDe_50CM_LFQ_myotubes_OG2 | 69952 | FTMS; HCD | 93.24 | 789.48 | Slx4ip     |

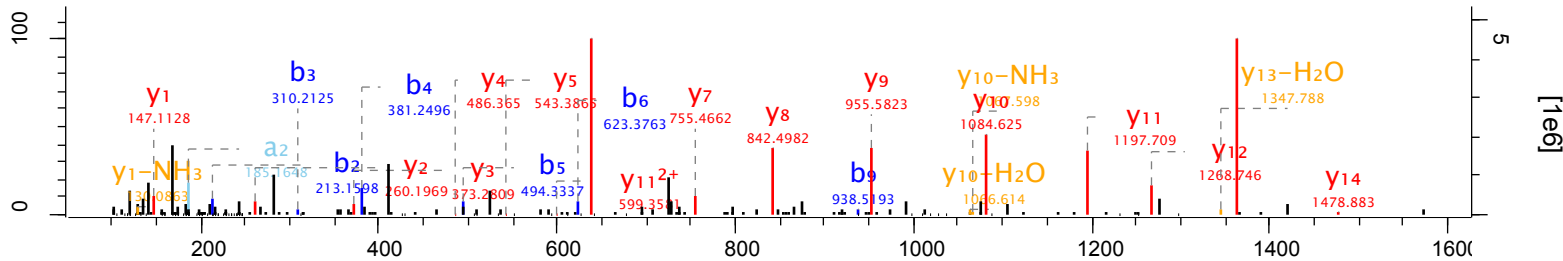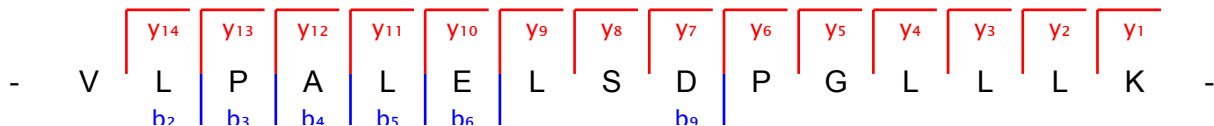

| Raw file                                 | Scan  | Method    | Score  | m/z    | Gene names |
|------------------------------------------|-------|-----------|--------|--------|------------|
| 20121213_EXQ1_AtDe_50CM_LFQ_myotubes_OG2 | 70087 | FTMS; HCD | 137.39 | 1207.6 | Ly6a       |

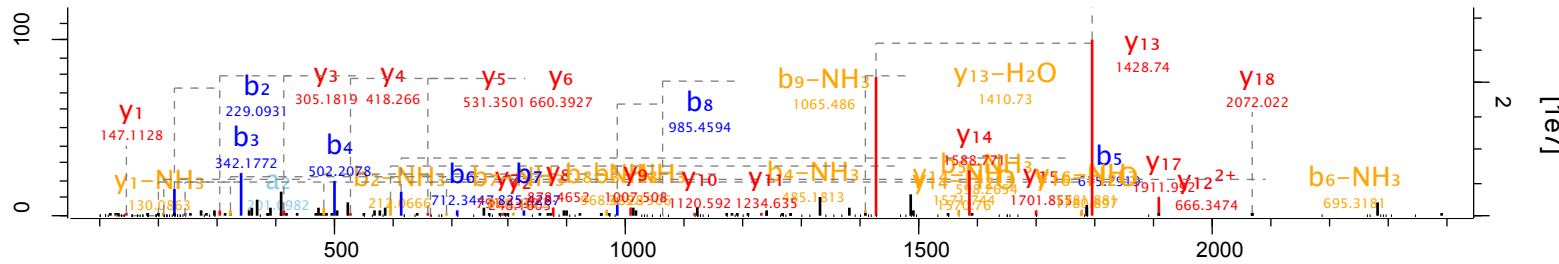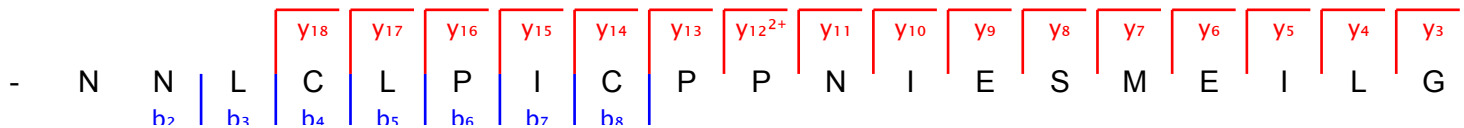

| Raw file                                 | Scan  | Method    | Score  | m/z    | Gene names |
|------------------------------------------|-------|-----------|--------|--------|------------|
| 20121213_EXQ1_AtDe_50CM_LFQ_myotubes_OG2 | 70099 | FTMS; HCD | 160.67 | 805.07 | Ly6a       |

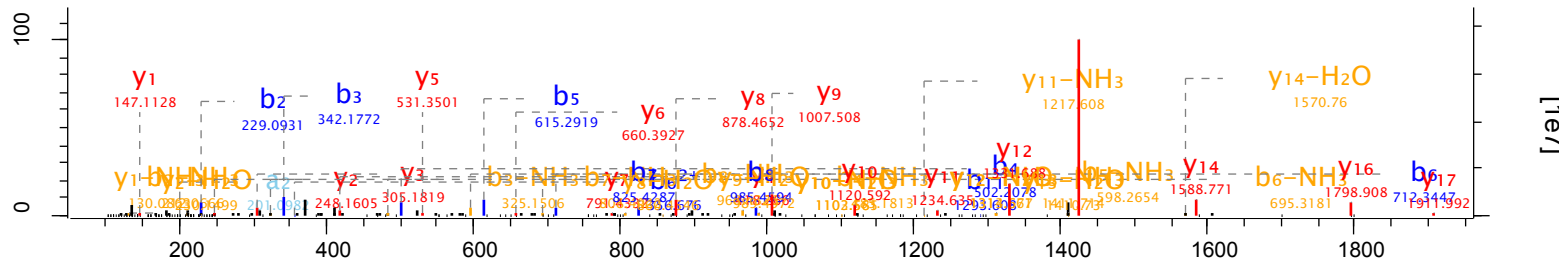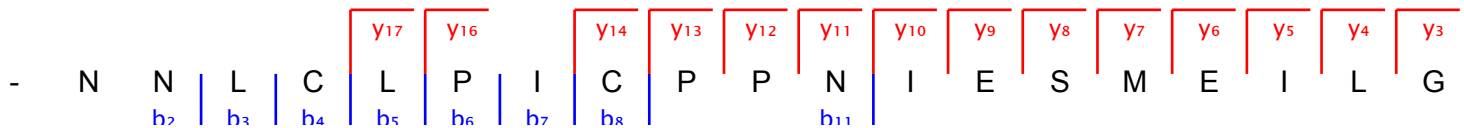

| Raw file                                 | Scan  | Method    | Score | m/z    | Gene names |
|------------------------------------------|-------|-----------|-------|--------|------------|
| 20121213_EXQ1_AtDe_50CM_LFQ_myotubes_OG3 | 21222 | FTMS; HCD | 84.88 | 609.79 | Tmc6       |

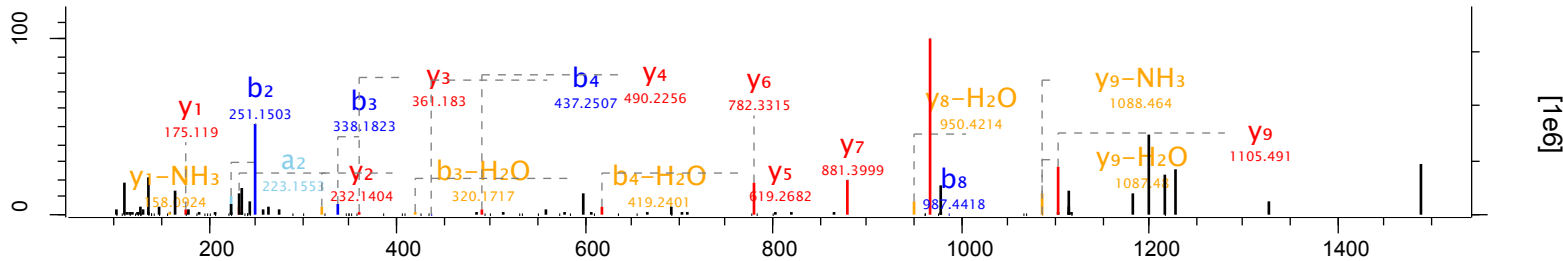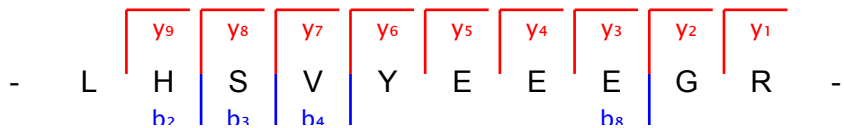



| Raw file                                 | Scan  | Method    | Score  | m/z    | Gene names |
|------------------------------------------|-------|-----------|--------|--------|------------|
| 20121213_EXQ1_AtDe_50CM_LFQ_myotubes_OG3 | 21658 | FTMS; HCD | 124.62 | 595.28 | Sdccag8    |

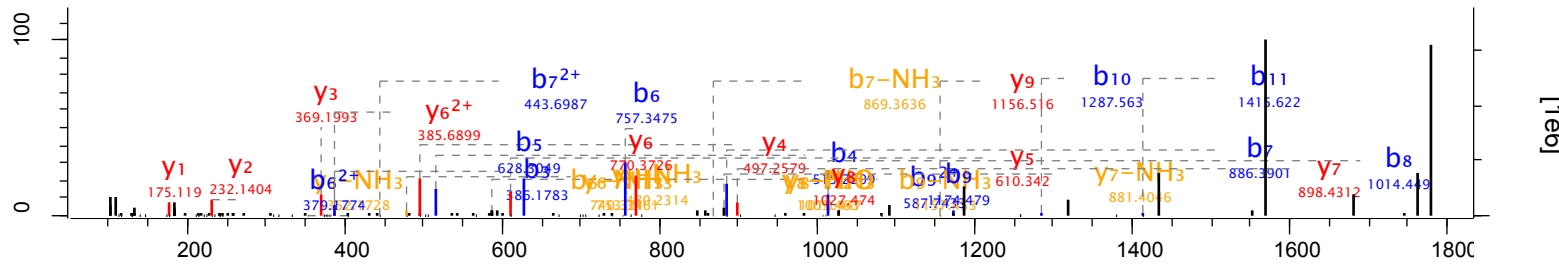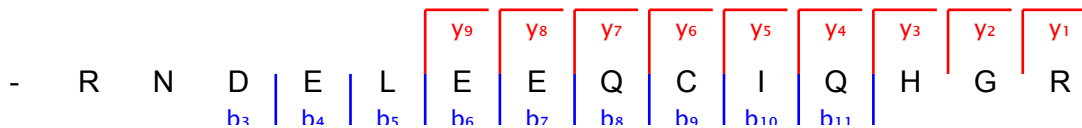

| Raw file                                 | Scan  | Method    | Score  | m/z    | Gene names      |
|------------------------------------------|-------|-----------|--------|--------|-----------------|
| 20121213_EXQ1_AtDe_50CM_LFQ_myotubes_OG3 | 25850 | FTMS; HCD | 101.05 | 947.91 | Kiaa0232;D5Ert5 |

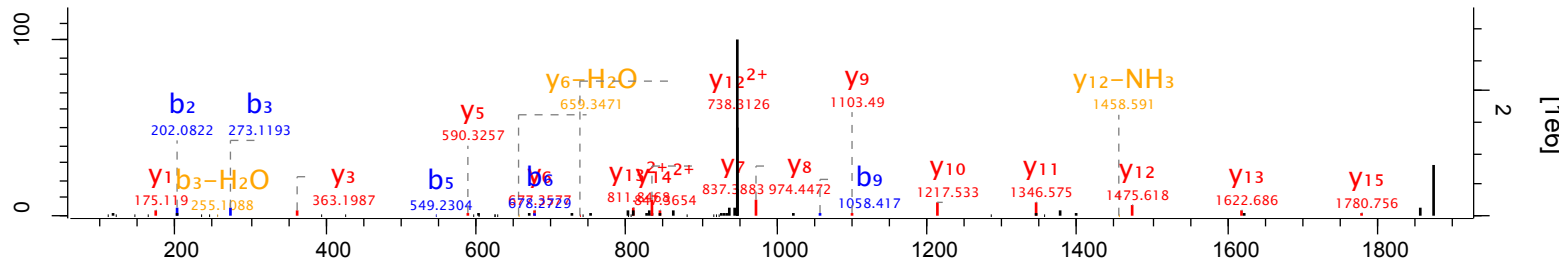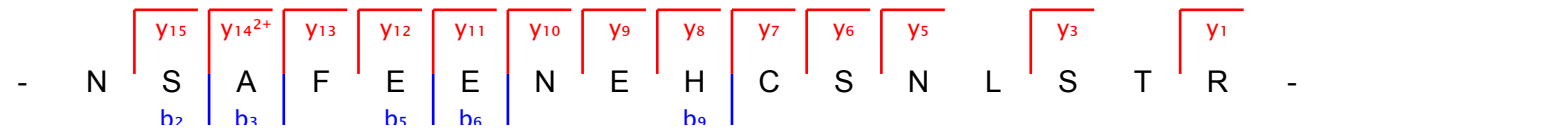

| Raw file                                 | Scan  | Method    | Score  | m/z    | Gene names |
|------------------------------------------|-------|-----------|--------|--------|------------|
| 20121213_EXQ1_AtDe_50CM_LFQ_myotubes_OG3 | 26499 | FTMS; HCD | 126.62 | 346.86 | Znf536     |

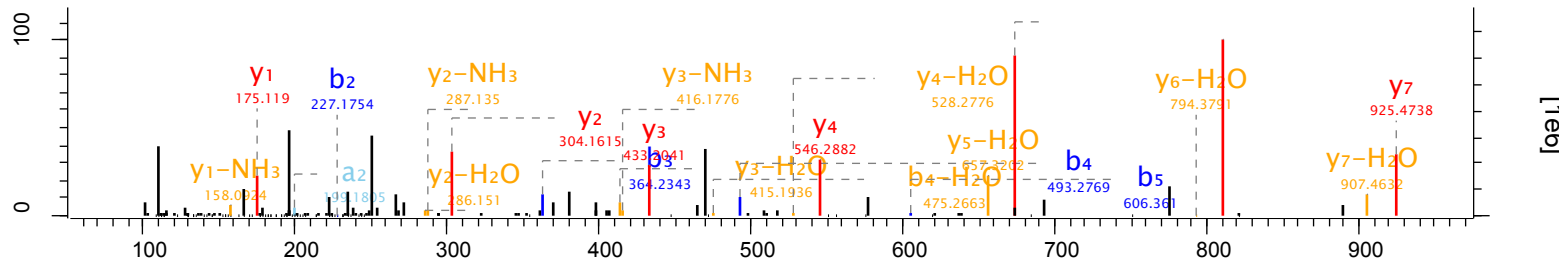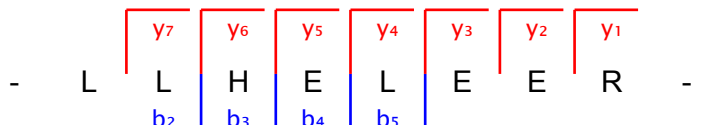

| Raw file                                 | Scan  | Method    | Score  | m/z    | Gene names |
|------------------------------------------|-------|-----------|--------|--------|------------|
| 20121213_EXQ1_AtDe_50CM_LFQ_myotubes_OG3 | 26516 | FTMS; HCD | 107.57 | 519.78 | Znf536     |

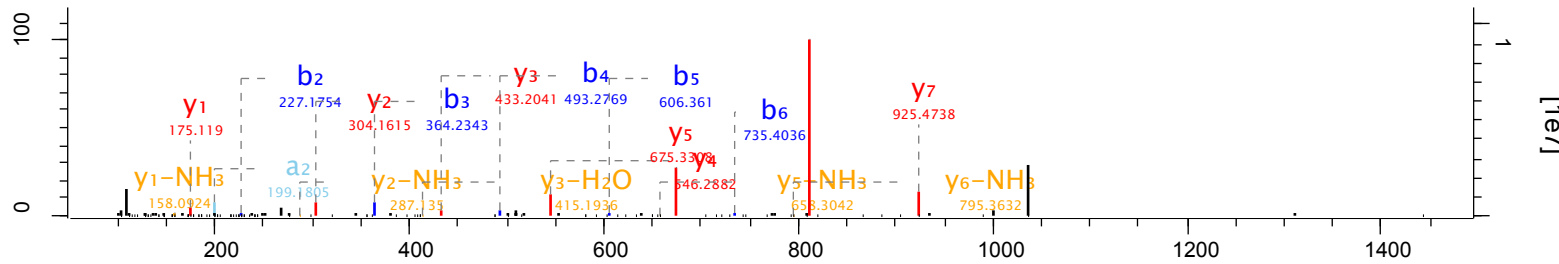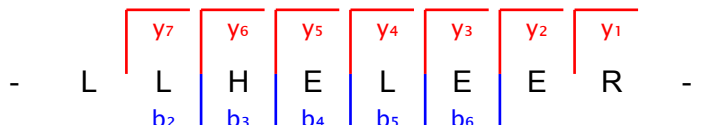

| Raw file                                 | Scan  | Method    | Score  | m/z    | Gene names |
|------------------------------------------|-------|-----------|--------|--------|------------|
| 20121213_EXQ1_AtDe_50CM_LFQ_myotubes_OG3 | 27735 | FTMS; HCD | 133.48 | 535.94 | Znhit1     |

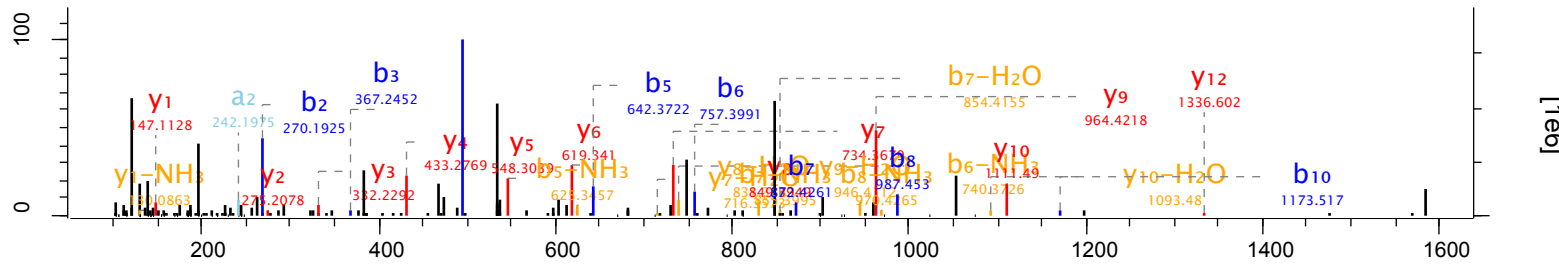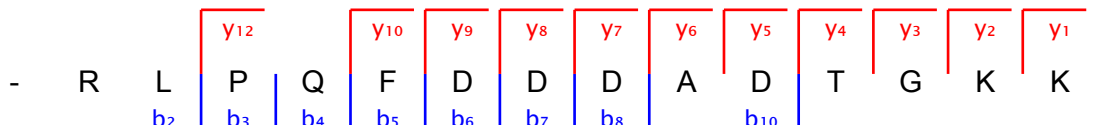

| Raw file                                 | Scan  | Method    | Score  | m/z    | Gene names |
|------------------------------------------|-------|-----------|--------|--------|------------|
| 20121213_EXQ1_AtDe_50CM_LFQ_myotubes_OG3 | 32211 | FTMS; HCD | 124.46 | 627.66 | Fam64a     |

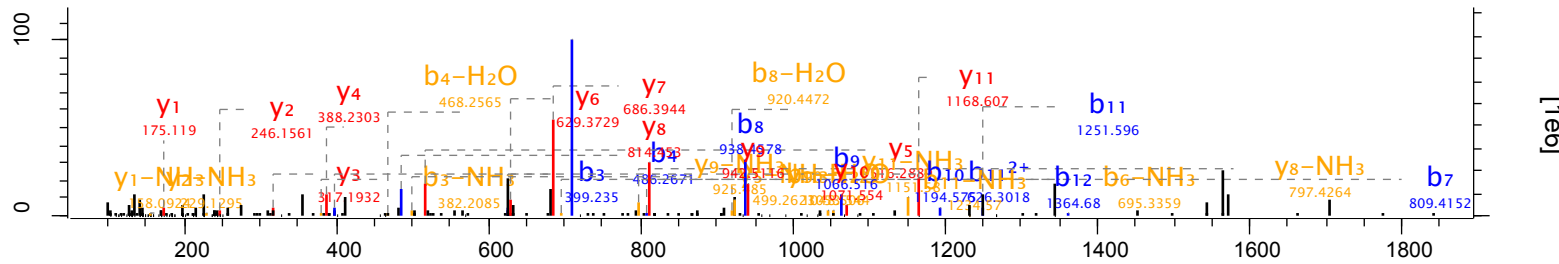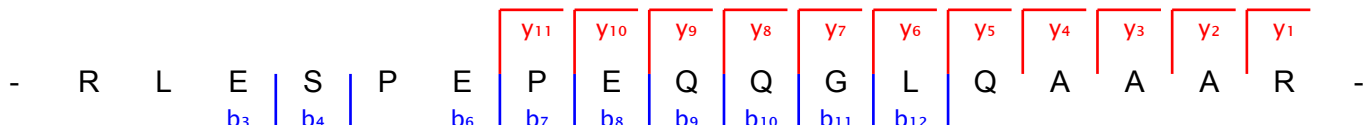

| Raw file                                 | Scan  | Method    | Score | m/z   | Gene names |
|------------------------------------------|-------|-----------|-------|-------|------------|
| 20121213_EXQ1_AtDe_50CM_LFQ_myotubes_OG3 | 32880 | FTMS; HCD | 49.12 | 626.8 | Casp8ap2   |

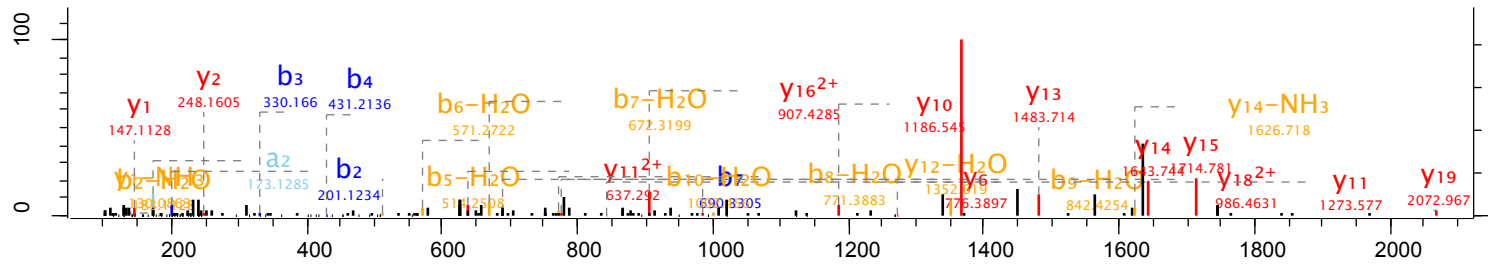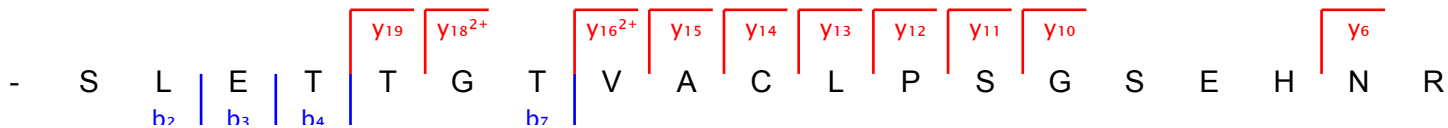

[1e6]

| Raw file                                 | Scan  | Method    | Score  | m/z    | Gene names |
|------------------------------------------|-------|-----------|--------|--------|------------|
| 20121213_EXQ1_AtDe_50CM_LFQ_myotubes_OG3 | 35097 | FTMS; HCD | 268.59 | 589.95 | Tmeff1     |

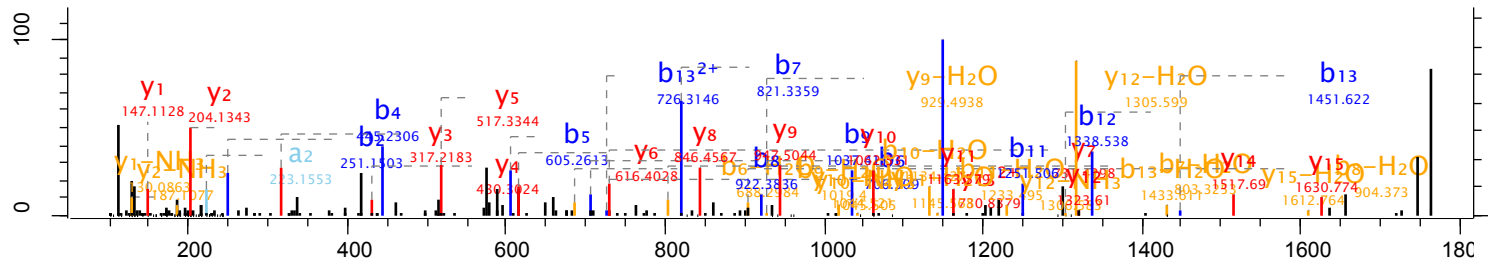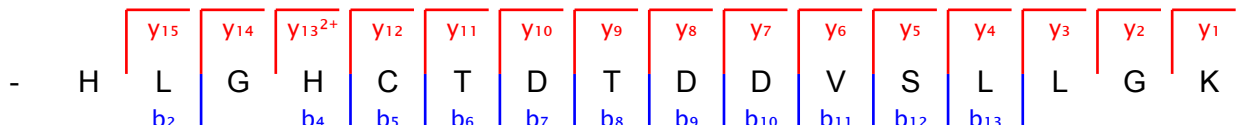



| Raw file                                 | Scan  | Method    | Score  | m/z    | Gene names |
|------------------------------------------|-------|-----------|--------|--------|------------|
| 20121213_EXQ1_AtDe_50CM_LFQ_myotubes_OG3 | 38638 | FTMS; HCD | 139.49 | 834.36 | Rnf145     |

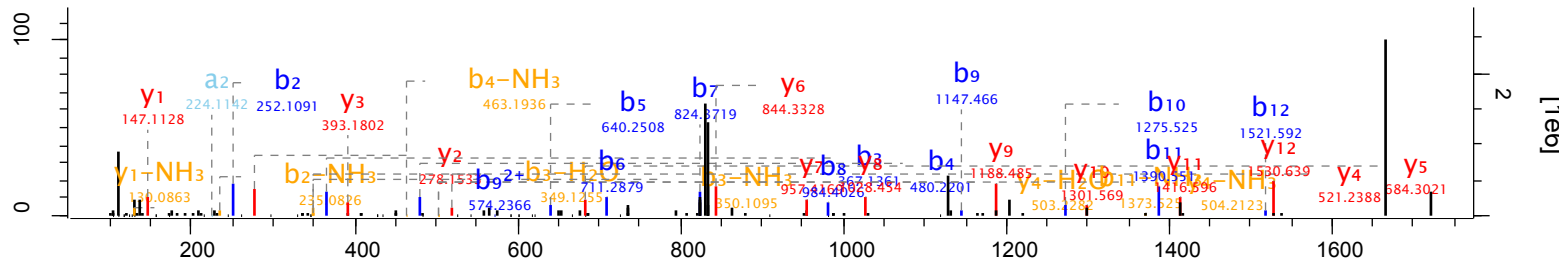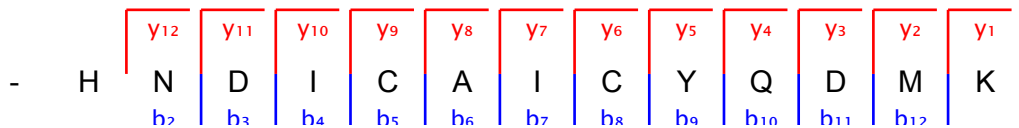

| Raw file                                 | Scan  | Method    | Score  | m/z    | Gene names |
|------------------------------------------|-------|-----------|--------|--------|------------|
| 20121213_EXQ1_AtDe_50CM_LFQ_myotubes_OG3 | 38695 | FTMS; HCD | 132.65 | 546.28 | Jrkl       |

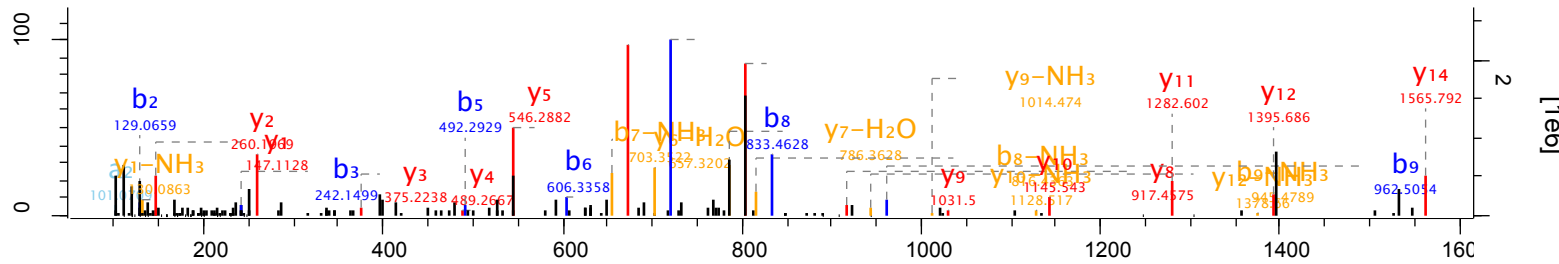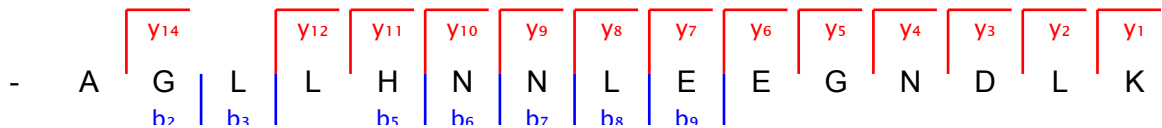

| Raw file                                 | Scan  | Method    | Score  | m/z    | Gene names |
|------------------------------------------|-------|-----------|--------|--------|------------|
| 20121213_EXQ1_AtDe_50CM_LFQ_myotubes_OG3 | 38706 | FTMS; HCD | 162.29 | 819.42 | Jrkl       |

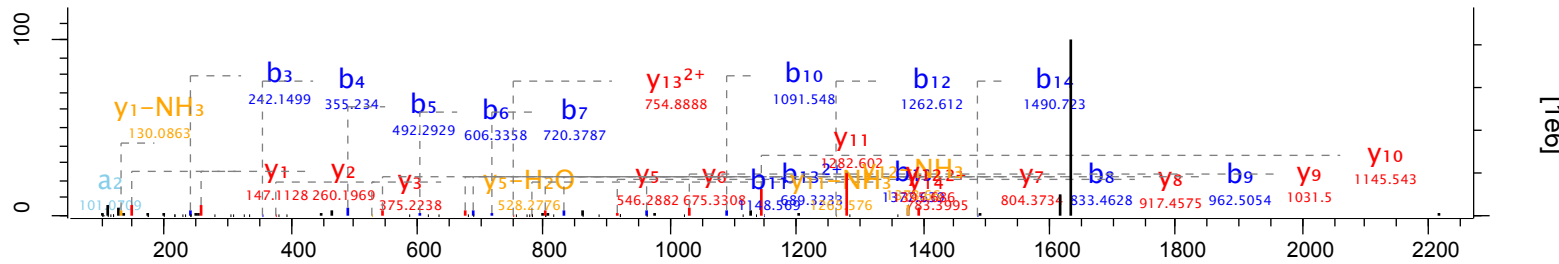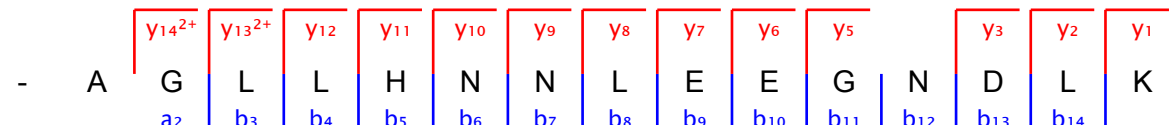

| Raw file                                 | Scan  | Method    | Score | m/z    | Gene names |
|------------------------------------------|-------|-----------|-------|--------|------------|
| 20121213_EXQ1_AtDe_50CM_LFQ_myotubes_OG3 | 39866 | FTMS; HCD | 57.57 | 470.56 | Vkorc1     |

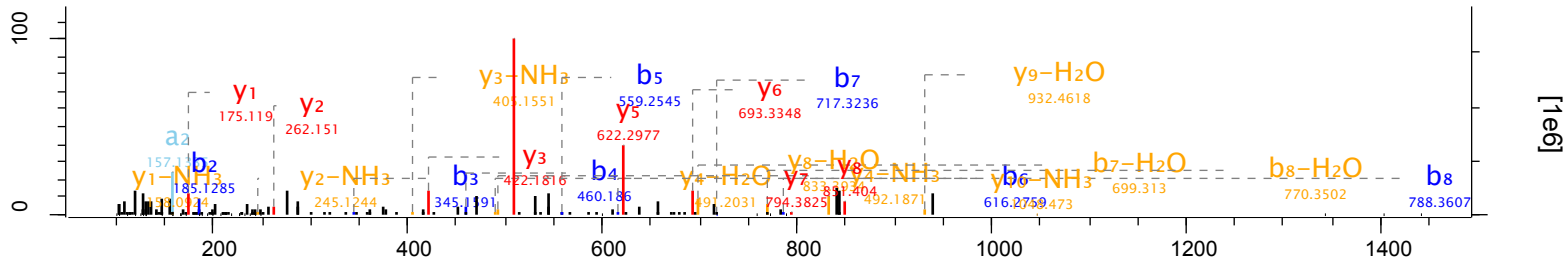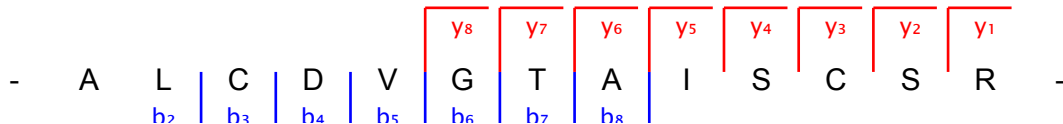

| Raw file                                 | Scan  | Method    | Score  | m/z    | Gene names |
|------------------------------------------|-------|-----------|--------|--------|------------|
| 20121213_EXQ1_AtDe_50CM_LFQ_myotubes_OG3 | 39879 | FTMS; HCD | 146.43 | 705.33 | Vkorc1     |

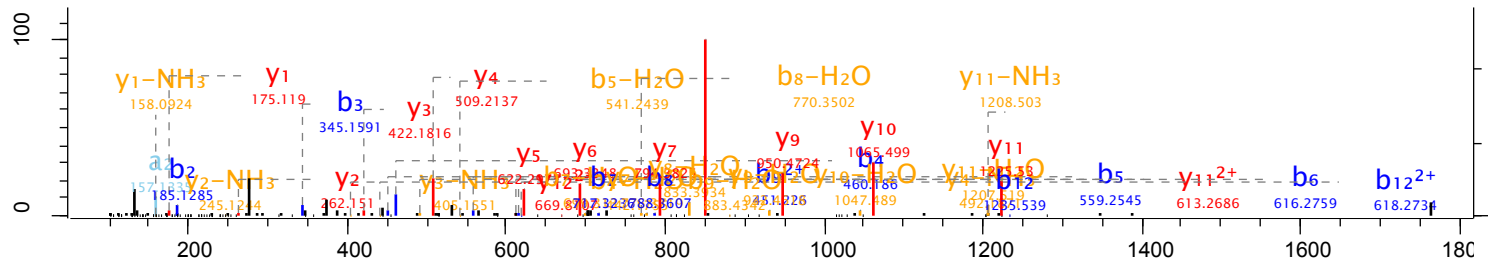

[1e7]

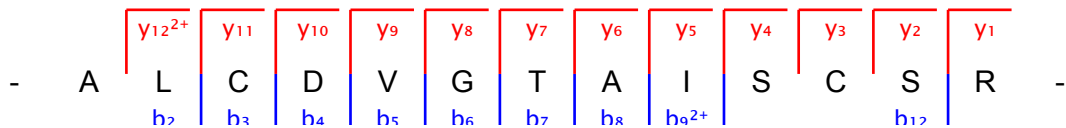

| Raw file                                 | Scan  | Method    | Score  | m/z    | Gene names |
|------------------------------------------|-------|-----------|--------|--------|------------|
| 20121213_EXQ1_AtDe_50CM_LFQ_myotubes_OG3 | 40753 | FTMS; HCD | 146.86 | 814.91 | Tctex1d2   |

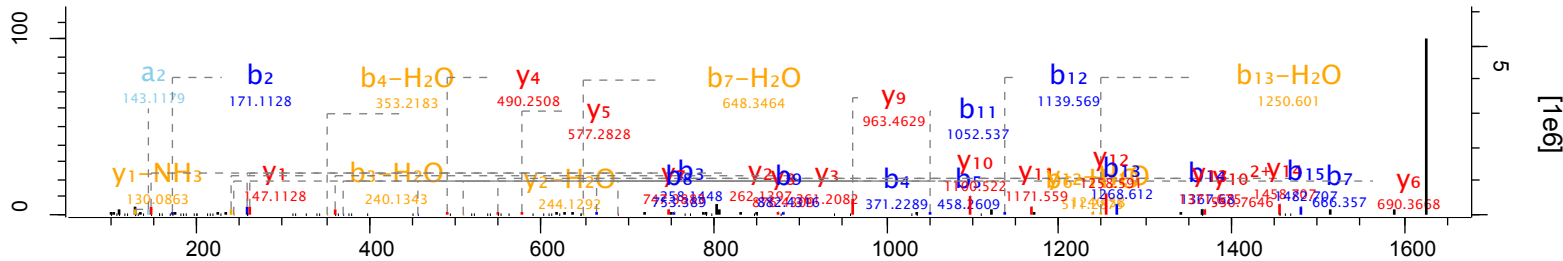

- G L S L S A H S E G L S E V D K -  
 b<sub>2</sub> b<sub>3</sub> b<sub>4</sub> b<sub>5</sub> b<sub>7</sub> b<sub>8</sub> b<sub>9</sub> b<sub>11</sub> b<sub>12</sub> b<sub>13</sub> b<sub>14</sub> b<sub>15</sub>  
 y<sub>14</sub> y<sub>13</sub> y<sub>12</sub> y<sub>11</sub> y<sub>10</sub> y<sub>9</sub> y<sub>8</sub> y<sub>7</sub> y<sub>6</sub> y<sub>5</sub> y<sub>4</sub> y<sub>3</sub> y<sub>2</sub> y<sub>1</sub>

| Raw file                                 | Scan  | Method    | Score | m/z    | Gene names |
|------------------------------------------|-------|-----------|-------|--------|------------|
| 20121213_EXQ1_AtDe_50CM_LFQ_myotubes_OG3 | 40774 | FTMS; HCD | 92.8  | 543.61 | Tctex1d2   |

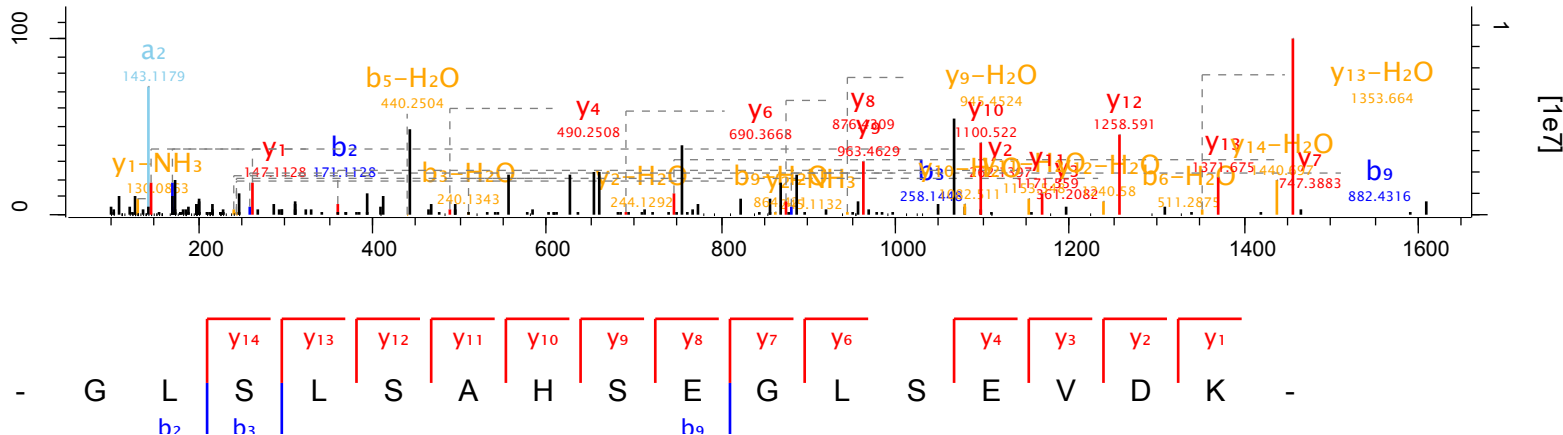

| Raw file                                 | Scan  | Method    | Score | m/z    | Gene names |
|------------------------------------------|-------|-----------|-------|--------|------------|
| 20121213_EXQ1_AtDe_50CM_LFQ_myotubes_OG3 | 42882 | FTMS; HCD | 149.4 | 476.24 | Mapk15     |

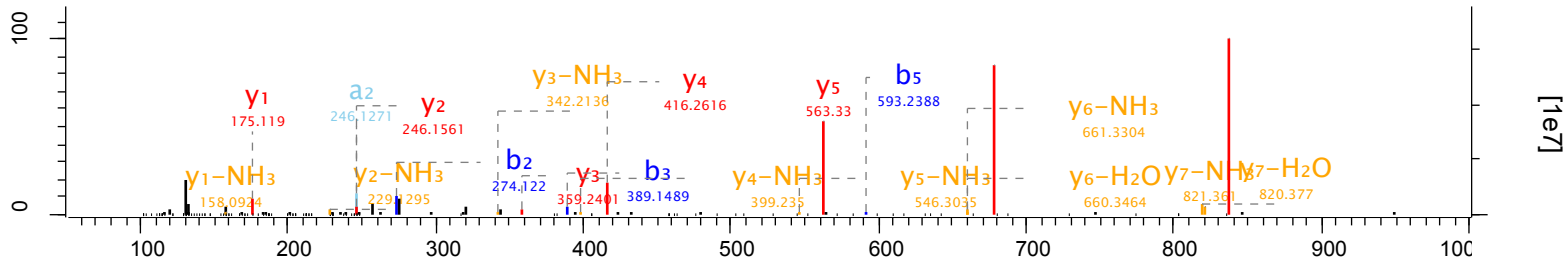



| Raw file                                 | Scan  | Method    | Score  | m/z    | Gene names |
|------------------------------------------|-------|-----------|--------|--------|------------|
| 20121213_EXQ1_AtDe_50CM_LFQ_myotubes_OG3 | 43196 | FTMS; HCD | 104.95 | 803.03 | Znf260     |

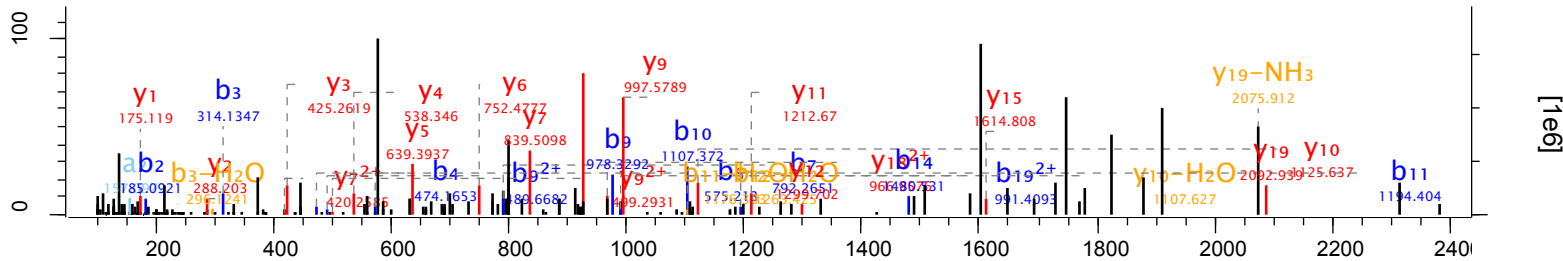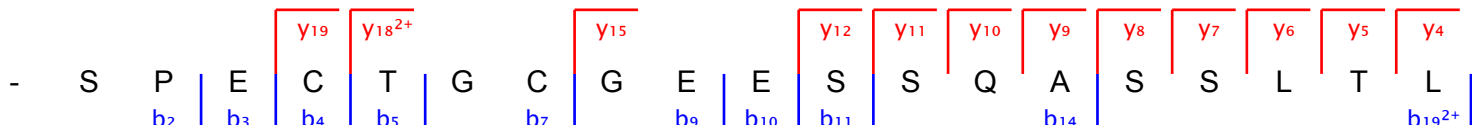

Supplement: supp_M114.044222_mcp.M114.044222-11.pdf [file supp_M114.044222_mcp.M114.044222-11.pdf]
