# Supplementary material
Source: PubMed Central journal article supplement (PMC4390264)

| Raw file                                   | Scan  | Method    | Score  | m/z    | Gene names  |
|--------------------------------------------|-------|-----------|--------|--------|-------------|
| 20121215_EXQ1_AtDe_50CM_LFQ_myotubes_OG2_7 | 13054 | FTMS; HCD | 132.97 | 532.27 | mt-Co3;Mtco |

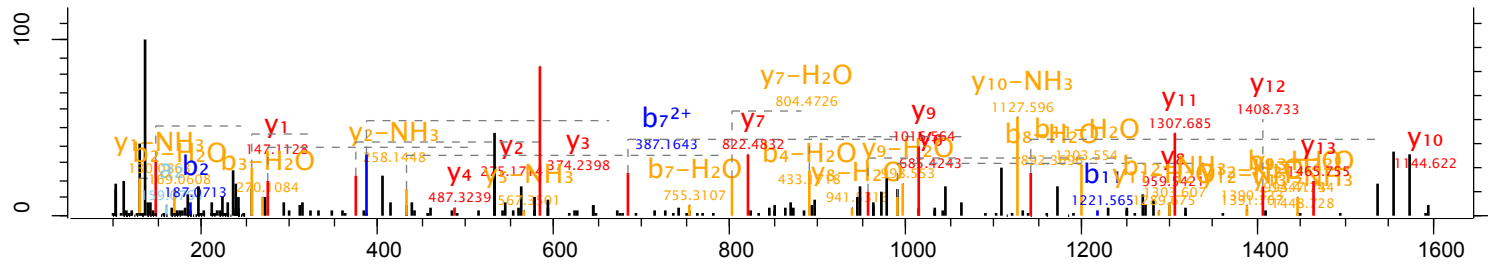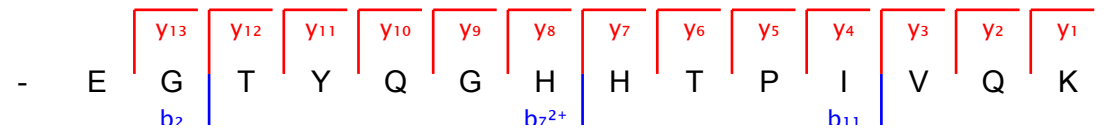

| Raw file                                   | Scan  | Method    | Score  | m/z    | Gene names  |
|--------------------------------------------|-------|-----------|--------|--------|-------------|
| 20121215_EXQ1_AtDe_50CM_LFQ_myotubes_OG2_7 | 13057 | FTMS; HCD | 188.12 | 798.41 | mt-Co3;Mtco |

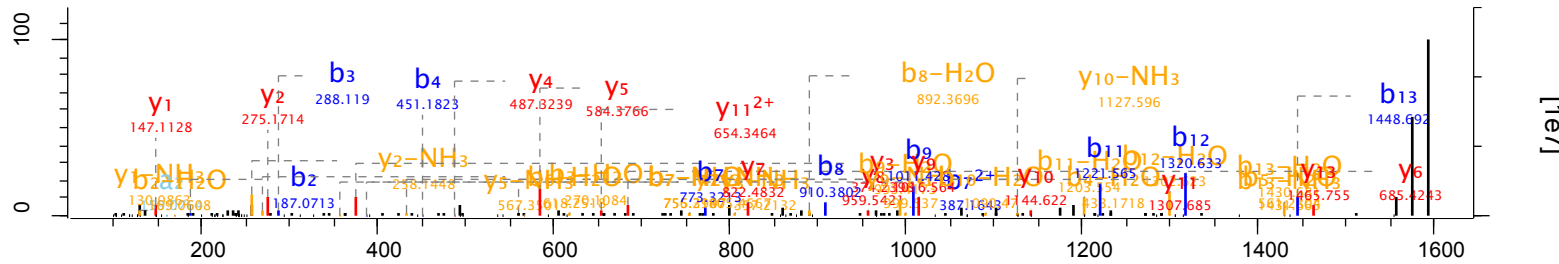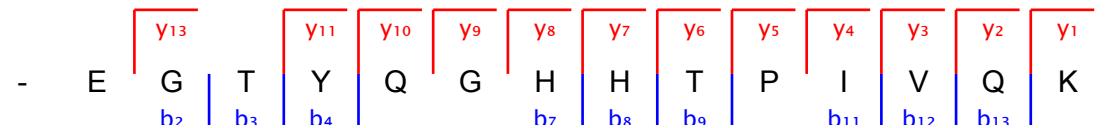

| Raw file                                   | Scan  | Method    | Score | m/z    | Gene names |
|--------------------------------------------|-------|-----------|-------|--------|------------|
| 20121215_EXQ1_AtDe_50CM_LFQ_myotubes_OG2_7 | 30949 | FTMS; HCD | 81.1  | 436.58 | Rpl39      |

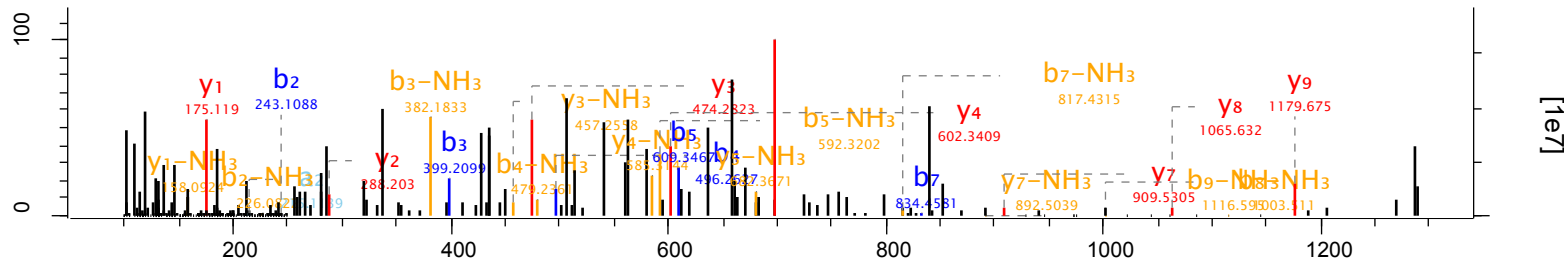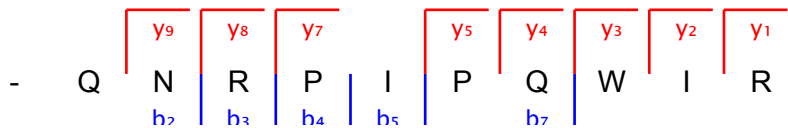

| Raw file                                   | Scan  | Method    | Score | m/z    | Gene names |
|--------------------------------------------|-------|-----------|-------|--------|------------|
| 20121215_EXQ1_AtDe_50CM_LFQ_myotubes_OG2_7 | 31914 | FTMS; HCD | 179.8 | 705.33 | Vkorc1     |

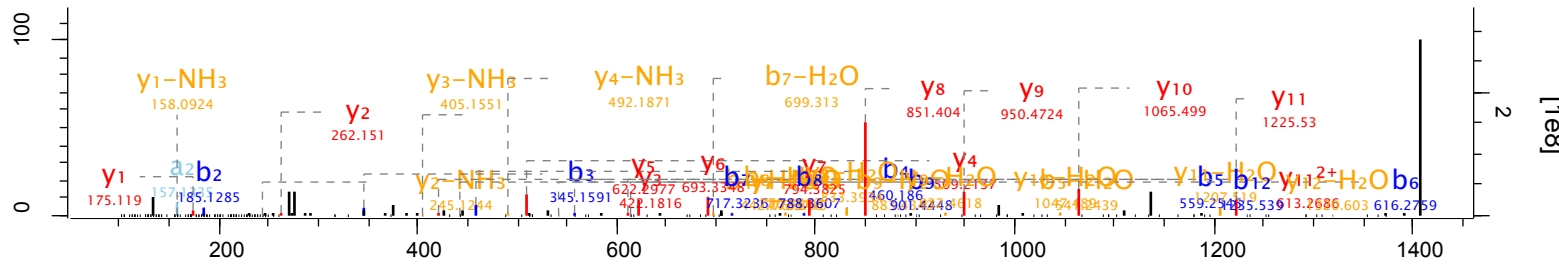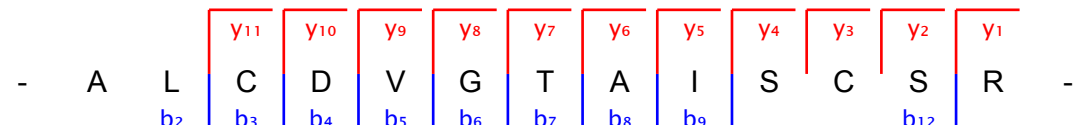

| Raw file                                   | Scan  | Method    | Score  | m/z    | Gene names  |
|--------------------------------------------|-------|-----------|--------|--------|-------------|
| 20121215_EXQ1_AtDe_50CM_LFQ_myotubes_OG2_7 | 32613 | FTMS; HCD | 148.62 | 836.36 | mt-Nd3;Mtnd |

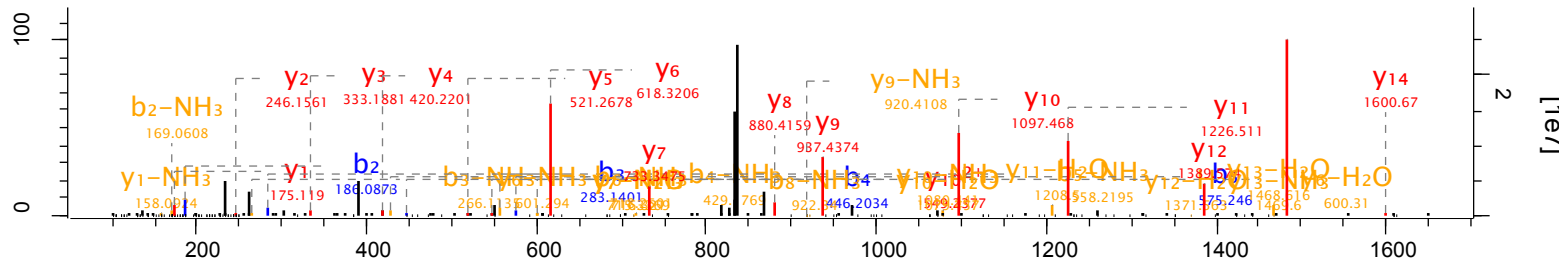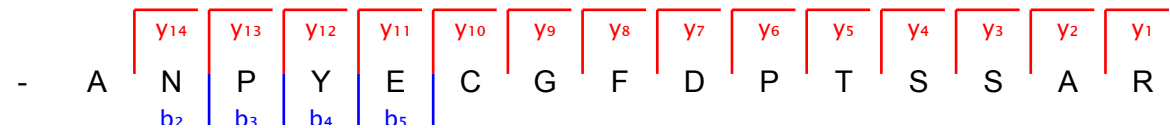

| Raw file                                   | Scan  | Method    | Score | m/z    | Gene names |
|--------------------------------------------|-------|-----------|-------|--------|------------|
| 20121215_EXQ1_AtDe_50CM_LFQ_myotubes_OG2_7 | 33794 | FTMS; HCD | 55.87 | 476.24 | Mapk15     |

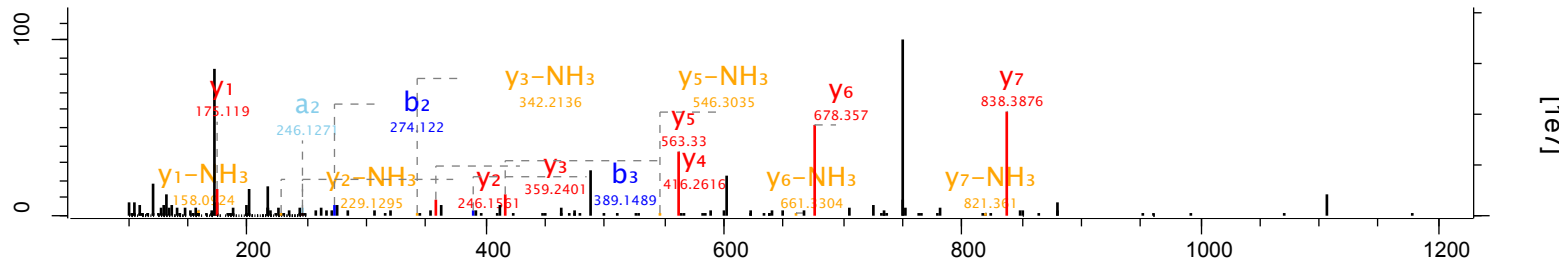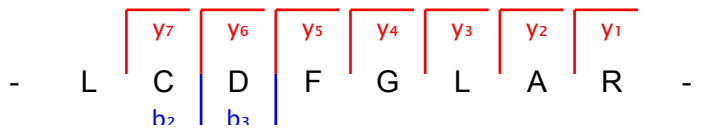

| Raw file                                   | Scan  | Method    | Score  | m/z    | Gene names |
|--------------------------------------------|-------|-----------|--------|--------|------------|
| 20121215_EXQ1_AtDe_50CM_LFQ_myotubes_OG2_7 | 42844 | FTMS; HCD | 150.55 | 574.63 | Aldh6a1    |

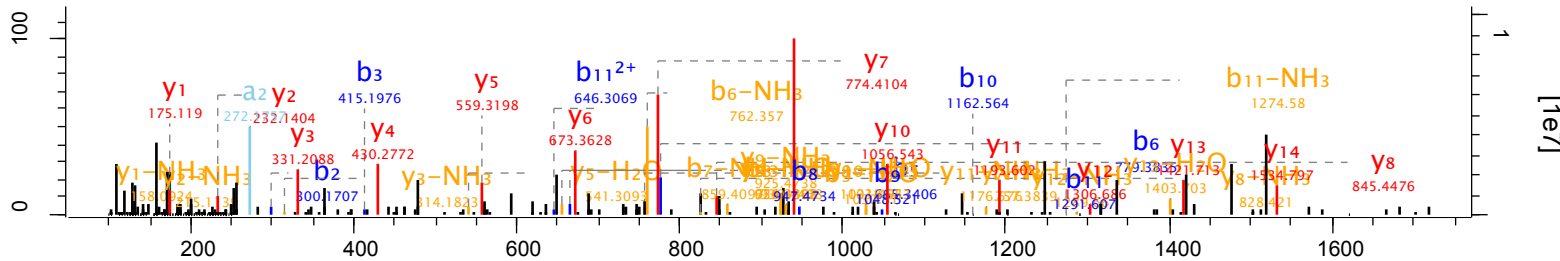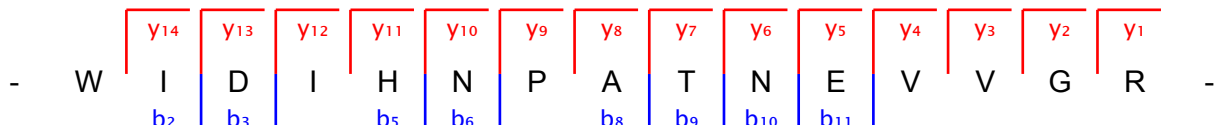



| Raw file                                   | Scan  | Method    | Score | m/z    | Gene names |
|--------------------------------------------|-------|-----------|-------|--------|------------|
| 20121215_EXQ1_AtDe_50CM_LFQ_myotubes_OG2_7 | 44474 | FTMS; HCD | 98.46 | 482.79 | Plch1      |

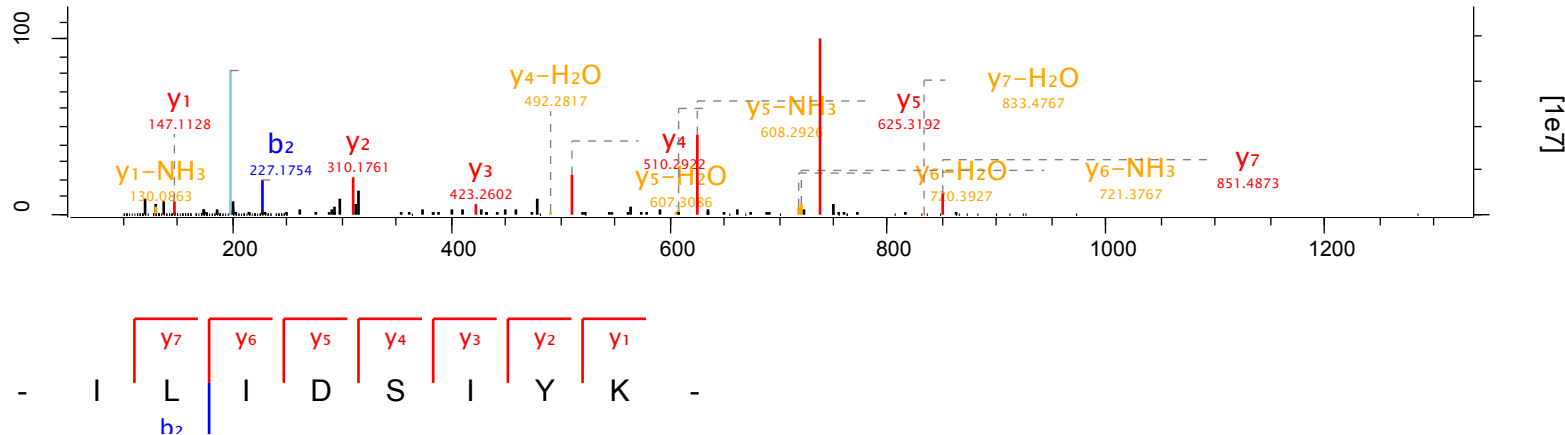

| Raw file                                   | Scan  | Method    | Score | m/z    | Gene names |
|--------------------------------------------|-------|-----------|-------|--------|------------|
| 20121215_EXQ1_AtDe_50CM_LFQ_myotubes_OG2_7 | 49309 | FTMS; HCD | 47.87 | 482.29 | Plch1      |

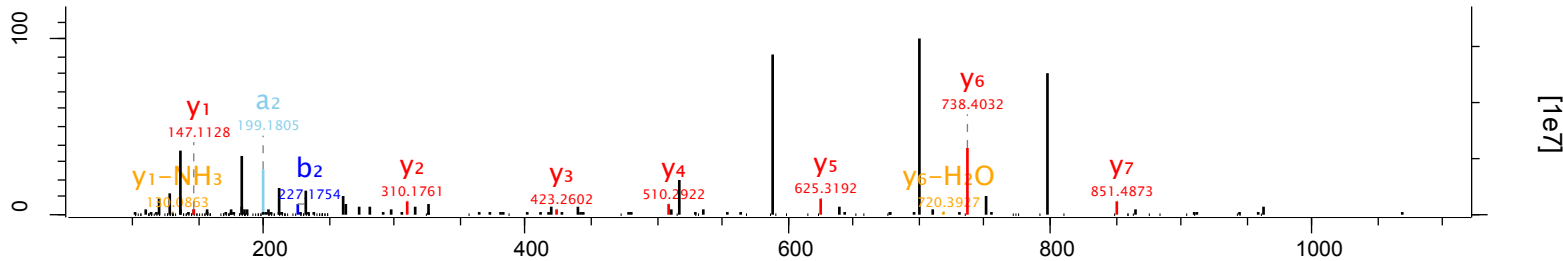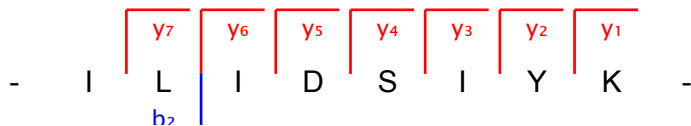

| Raw file                                   | Scan  | Method    | Score  | m/z | Gene names |
|--------------------------------------------|-------|-----------|--------|-----|------------|
| 20121215_EXQ1_AtDe_50CM_LFQ_myotubes_OG2_7 | 50263 | FTMS; HCD | 112.28 | 881 | Krtcap2    |

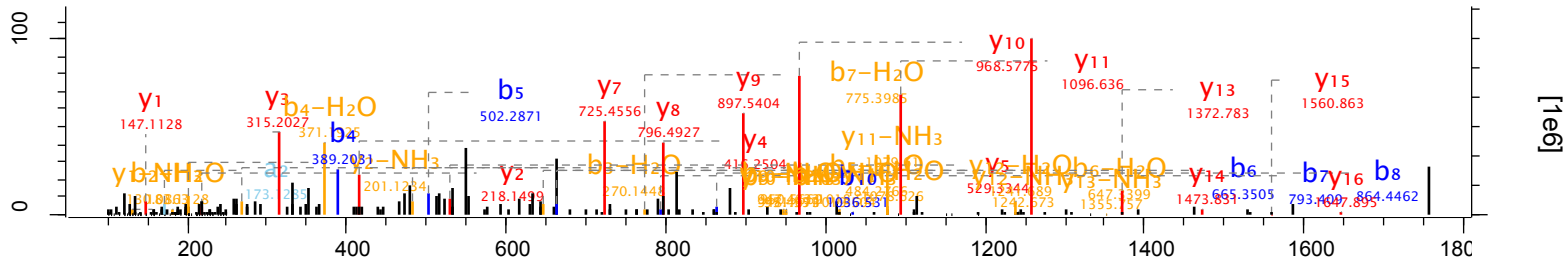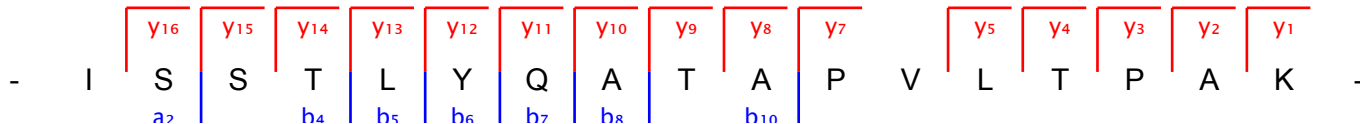

| Raw file                                   | Scan  | Method    | Score | m/z    | Gene names |
|--------------------------------------------|-------|-----------|-------|--------|------------|
| 20121215_EXQ1_AtDe_50CM_LFQ_myotubes_OG2_7 | 50766 | FTMS; HCD | 96.03 | 504.73 | Tmem258    |

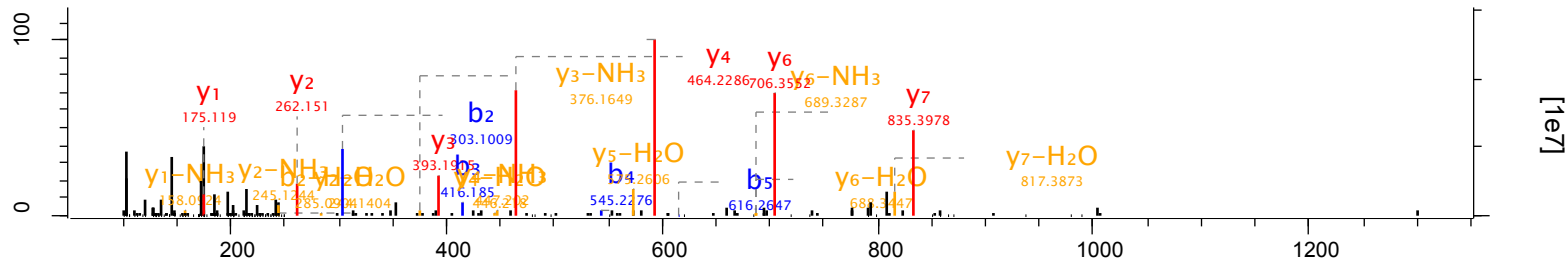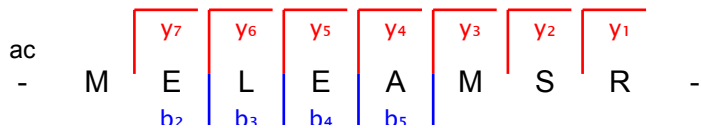

| Raw file                                   | Scan  | Method    | Score  | m/z    | Gene names |
|--------------------------------------------|-------|-----------|--------|--------|------------|
| 20121215_EXQ1_AtDe_50CM_LFQ_myotubes_OG2_7 | 51834 | FTMS; HCD | 107.69 | 496.76 | Sept3      |

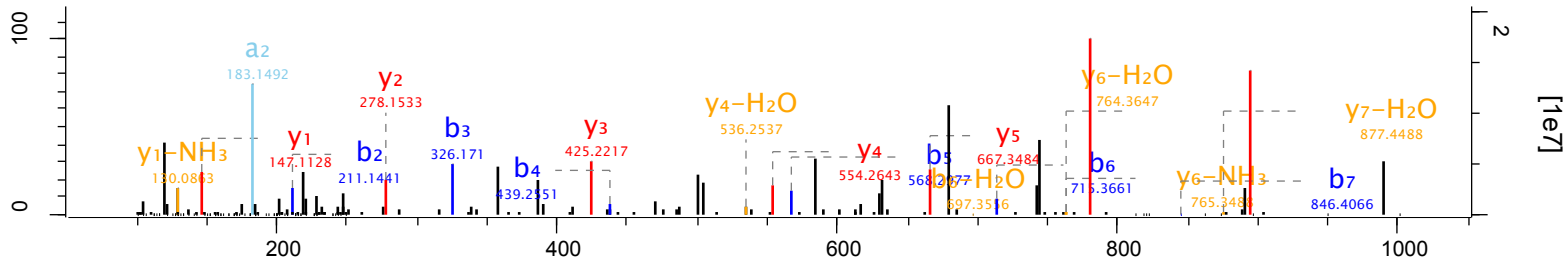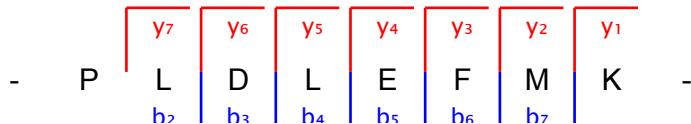

| Raw file                                   | Scan  | Method    | Score | m/z    | Gene names |
|--------------------------------------------|-------|-----------|-------|--------|------------|
| 20121215_EXQ1_AtDe_50CM_LFQ_myotubes_OG2_7 | 52534 | FTMS; HCD | 92.1  | 765.03 | Cnih4      |

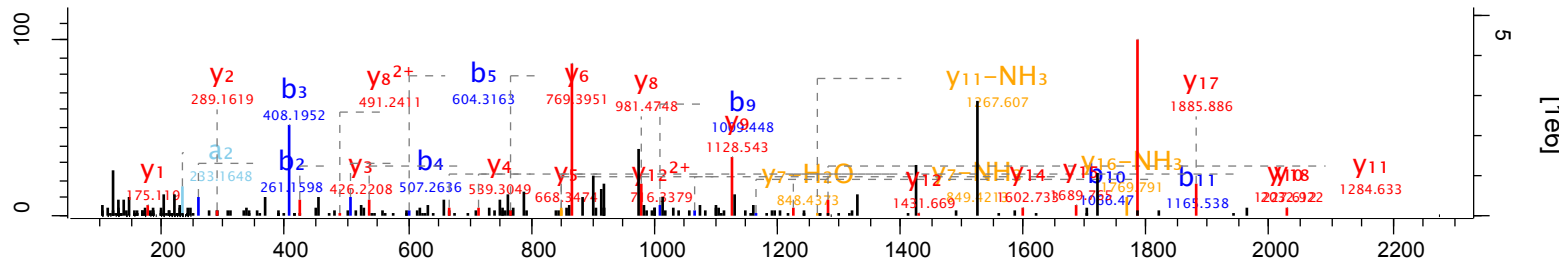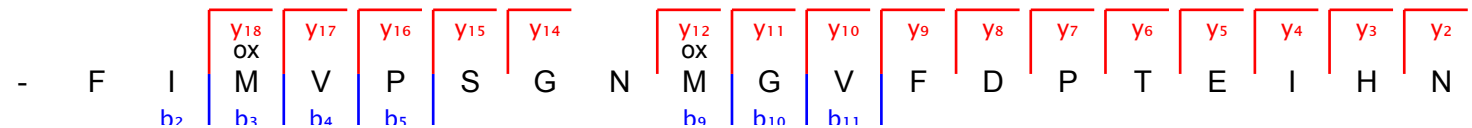

| Raw file                                   | Scan  | Method    | Score | m/z    | Gene names |
|--------------------------------------------|-------|-----------|-------|--------|------------|
| 20121215_EXQ1_AtDe_50CM_LFQ_myotubes_OG2_7 | 52932 | FTMS; HCD | 72.82 | 708.34 | Ndufa1     |

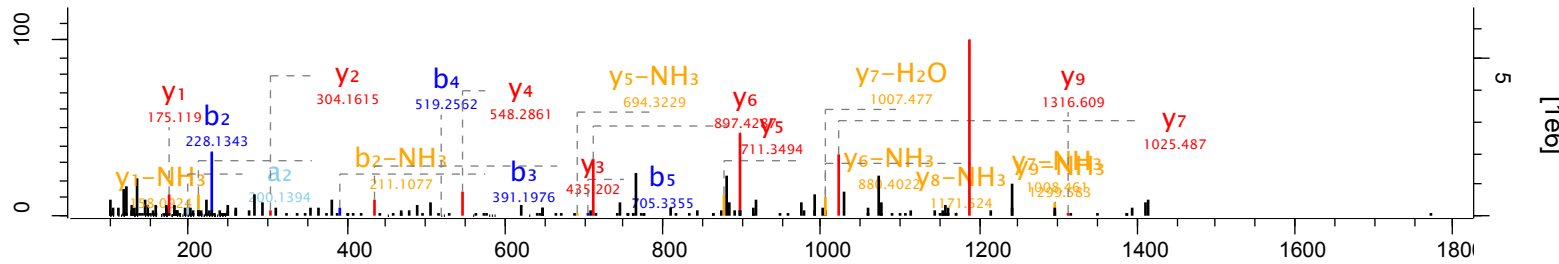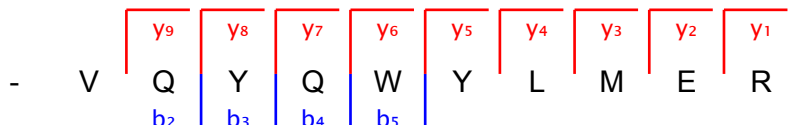

| Raw file                                   | Scan  | Method    | Score | m/z    | Gene names |
|--------------------------------------------|-------|-----------|-------|--------|------------|
| 20121215_EXQ1_AtDe_50CM_LFQ_myotubes_OG2_7 | 54486 | FTMS; HCD | 69.07 | 966.45 | Tmem128    |

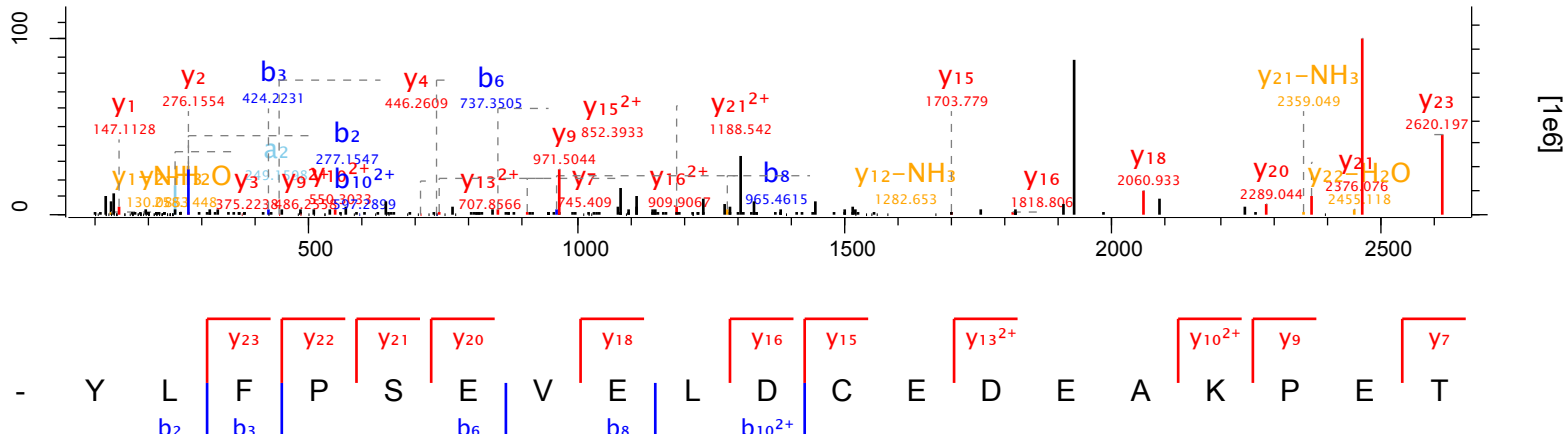



| Raw file                                   | Scan  | Method    | Score | m/z    | Gene names |
|--------------------------------------------|-------|-----------|-------|--------|------------|
| 20121215_EXQ1_AtDe_50CM_LFQ_myotubes_OG2_7 | 57287 | FTMS; HCD | 62.47 | 560.81 | Col6a3     |

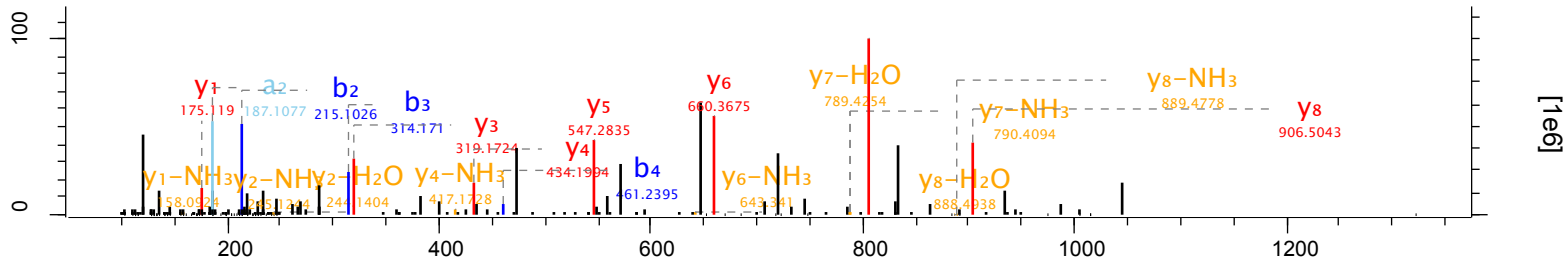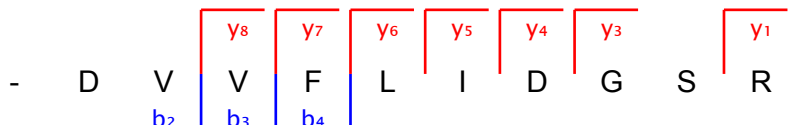

| Raw file                                   | Scan  | Method    | Score | m/z   | Gene names |
|--------------------------------------------|-------|-----------|-------|-------|------------|
| 20121215_EXQ1_AtDe_50CM_LFQ_myotubes_OG2_7 | 59378 | FTMS; HCD | 64.06 | 681.3 | Tmem8c     |

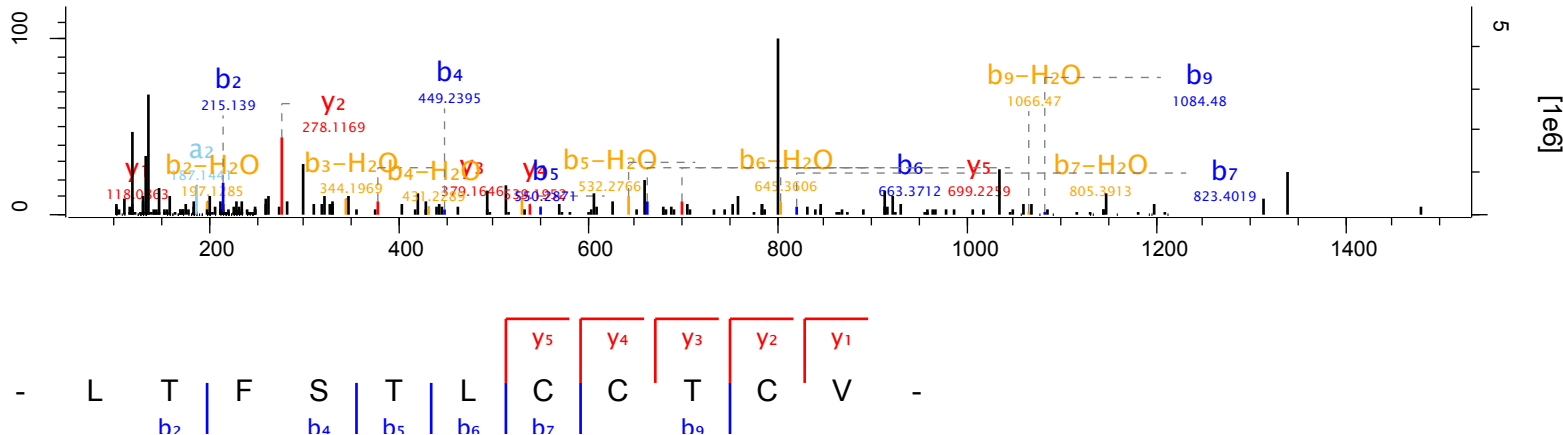

| Raw file                                   | Scan  | Method    | Score  | m/z     | Gene names |
|--------------------------------------------|-------|-----------|--------|---------|------------|
| 20121215_EXQ1_AtDe_50CM_LFQ_myotubes_OG2_7 | 64123 | FTMS; HCD | 109.37 | 1131.55 | Cnih4      |

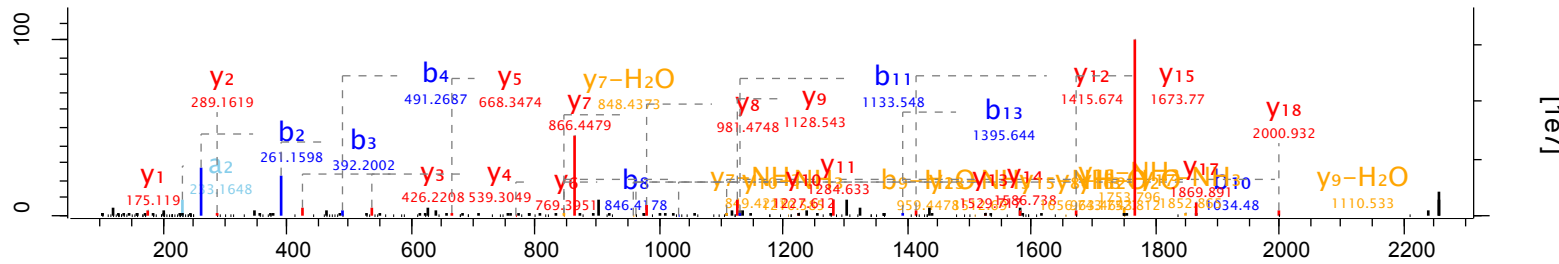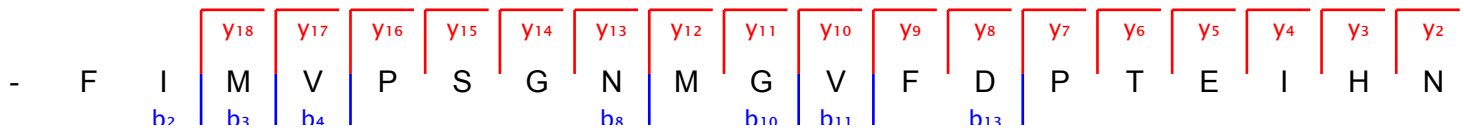

| Raw file                                   | Scan  | Method    | Score  | m/z    | Gene names |
|--------------------------------------------|-------|-----------|--------|--------|------------|
| 20121215_EXQ1_AtDe_50CM_LFQ_myotubes_OG2_7 | 68392 | FTMS; HCD | 138.89 | 697.41 | Atrx       |

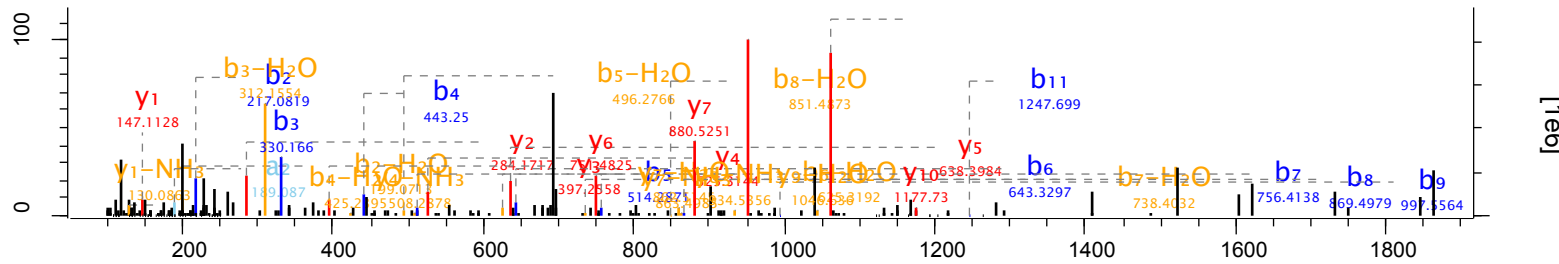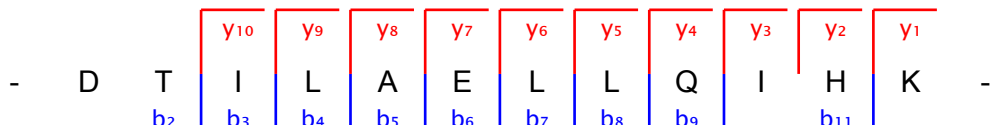

| Raw file                                   | Scan  | Method    | Score  | m/z    | Gene names |
|--------------------------------------------|-------|-----------|--------|--------|------------|
| 20121215_EXQ1_AtDe_50CM_LFQ_myotubes_OG2_7 | 69252 | FTMS; HCD | 139.31 | 715.91 | Uqcr11     |

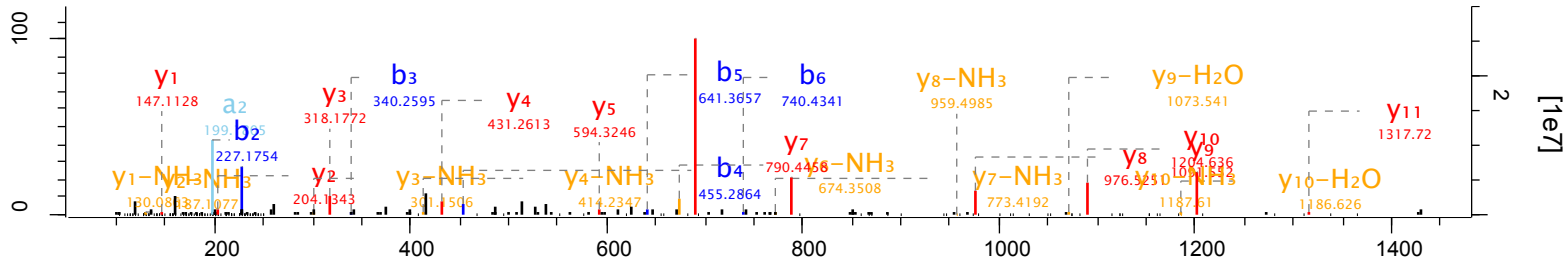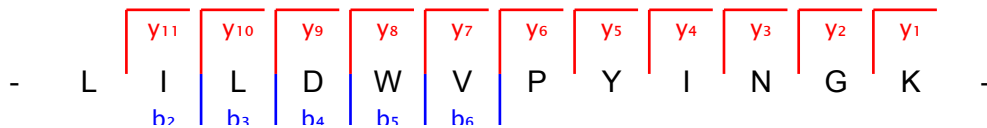

| Raw file                                   | Scan  | Method    | Score | m/z    | Gene names |
|--------------------------------------------|-------|-----------|-------|--------|------------|
| 20121215_EXQ1_AtDe_50CM_LFQ_myotubes_OG2_7 | 72442 | FTMS; HCD | 93.24 | 871.94 | Tomm7      |

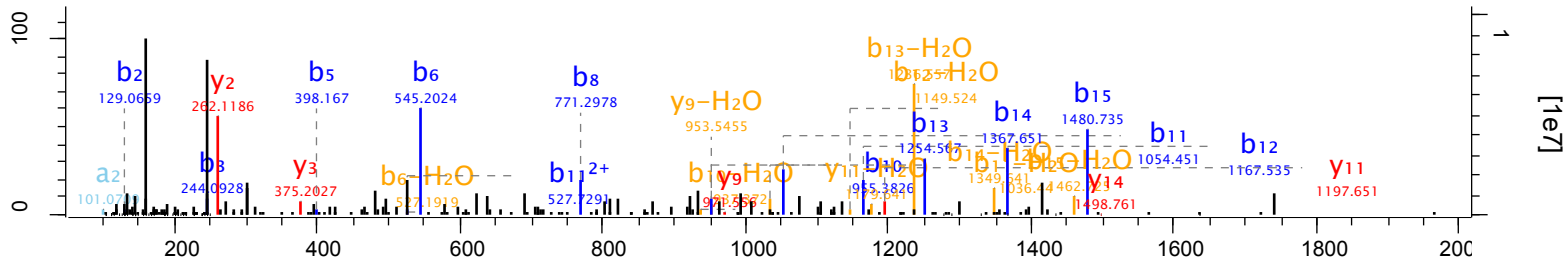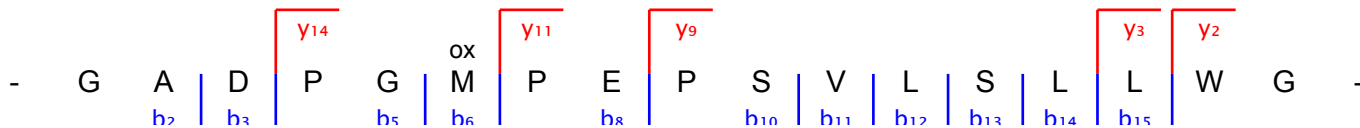

| Raw file                                   | Scan  | Method    | Score | m/z    | Gene names |
|--------------------------------------------|-------|-----------|-------|--------|------------|
| 20121215_EXQ1_AtDe_50CM_LFQ_myotubes_OG2_7 | 72865 | FTMS; HCD | 42.95 | 863.44 | Tomm7      |

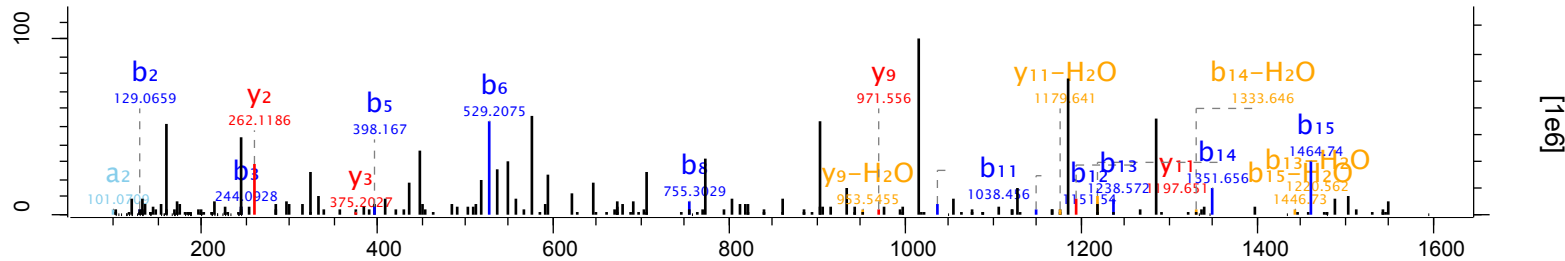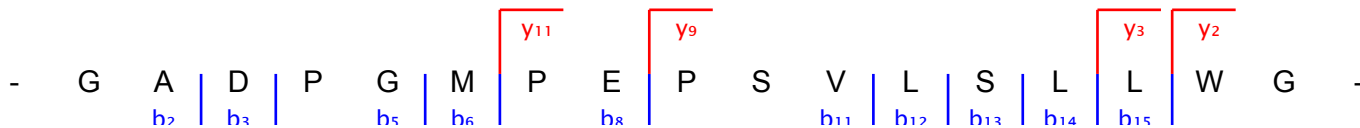

| Raw file                                   | Scan  | Method    | Score  | m/z    | Gene names |
|--------------------------------------------|-------|-----------|--------|--------|------------|
| 20121215_EXQ1_AtDe_50CM_LFQ_myotubes_OG2_8 | 18193 | FTMS; HCD | 125.83 | 654.37 | Rpl39      |

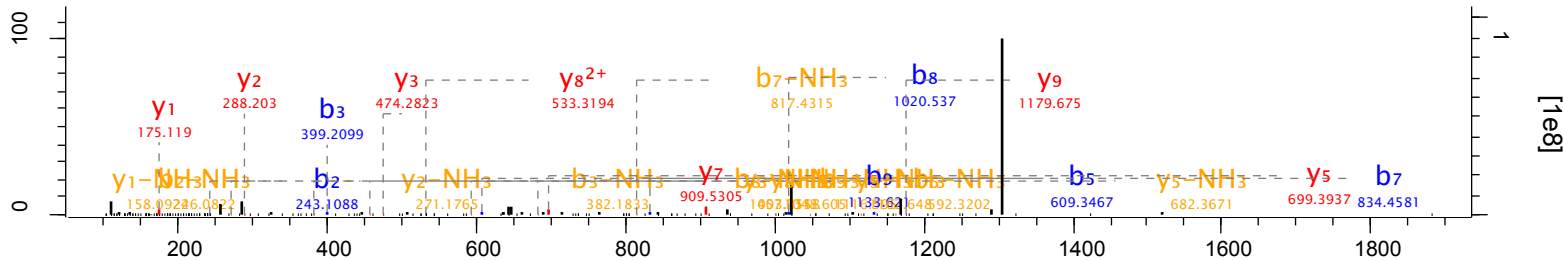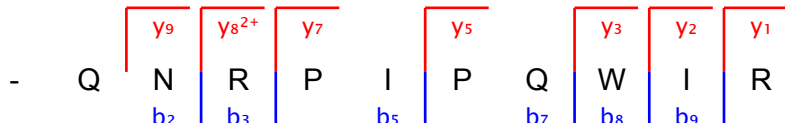



| Raw file                                   | Scan  | Method    | Score  | m/z    | Gene names |
|--------------------------------------------|-------|-----------|--------|--------|------------|
| 20121215_EXQ1_AtDe_50CM_LFQ_myotubes_OG2_8 | 18259 | FTMS; HCD | 120.33 | 436.58 | Rpl39      |

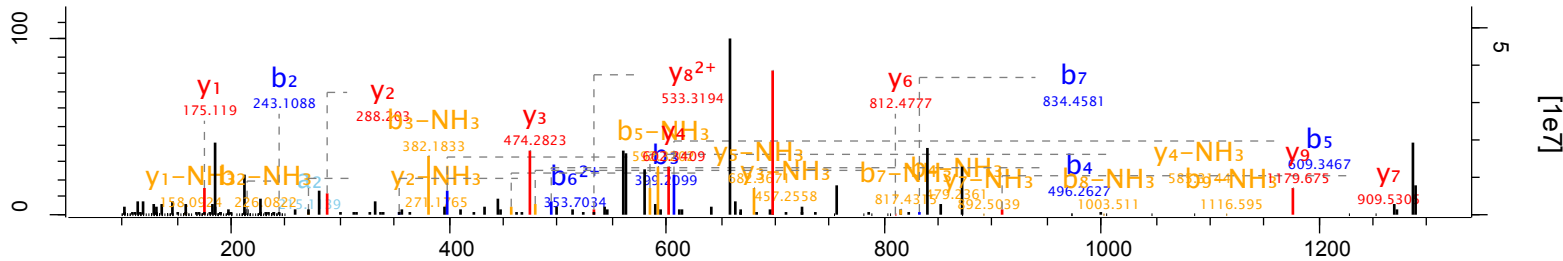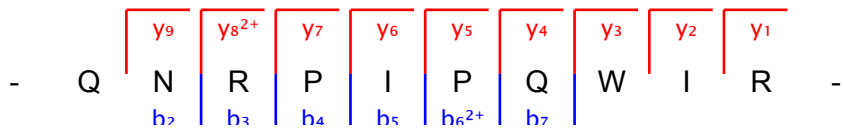

| Raw file                                   | Scan  | Method    | Score  | m/z    | Gene names |
|--------------------------------------------|-------|-----------|--------|--------|------------|
| 20121215_EXQ1_AtDe_50CM_LFQ_myotubes_OG2_8 | 19196 | FTMS; HCD | 172.33 | 705.33 | Vkorc1     |

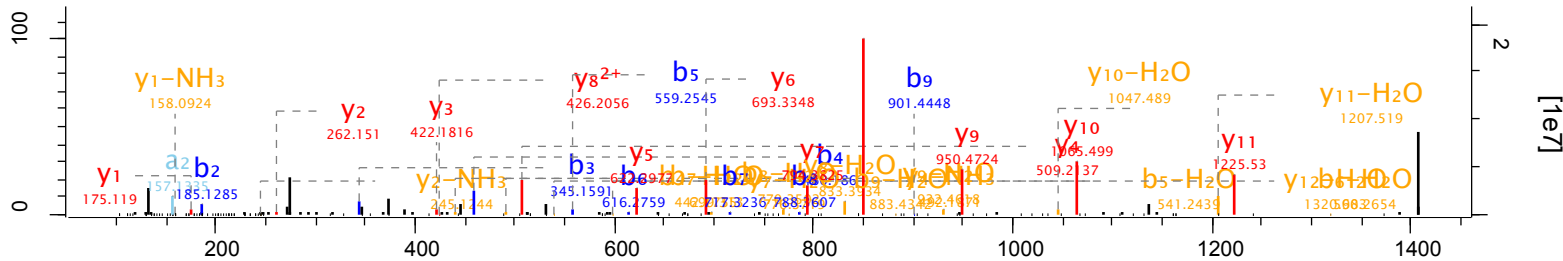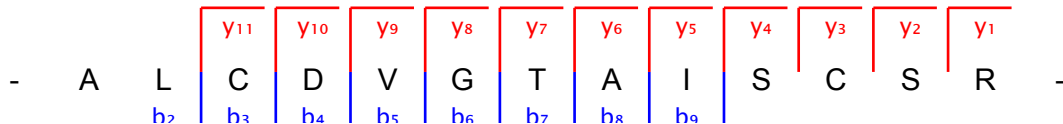

| Raw file                                   | Scan  | Method    | Score | m/z    | Gene names   |
|--------------------------------------------|-------|-----------|-------|--------|--------------|
| 20121215_EXQ1_AtDe_50CM_LFQ_myotubes_OG2_8 | 19830 | FTMS; HCD | 57.7  | 836.36 | mt-Nd3;Mtnd3 |

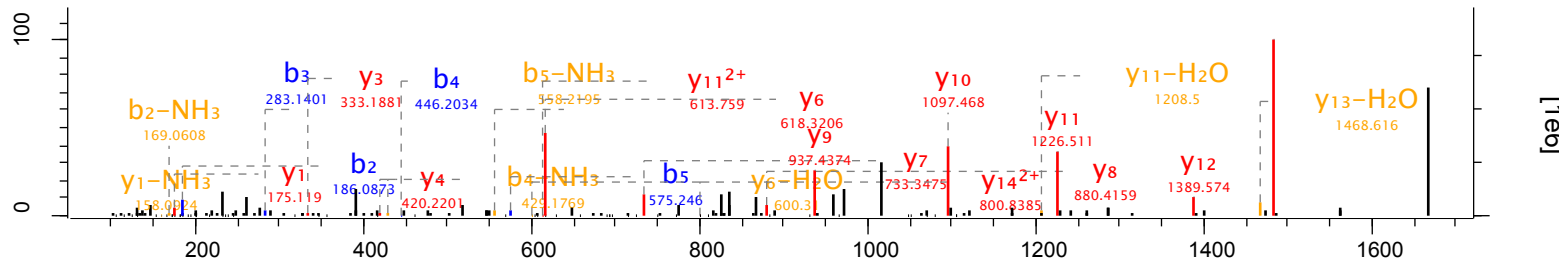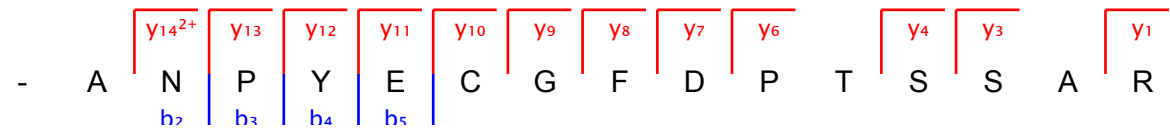

| Raw file                                   | Scan  | Method    | Score | m/z    | Gene names |
|--------------------------------------------|-------|-----------|-------|--------|------------|
| 20121215_EXQ1_AtDe_50CM_LFQ_myotubes_OG2_8 | 20979 | FTMS; HCD | 86.83 | 476.24 | Mapk15     |

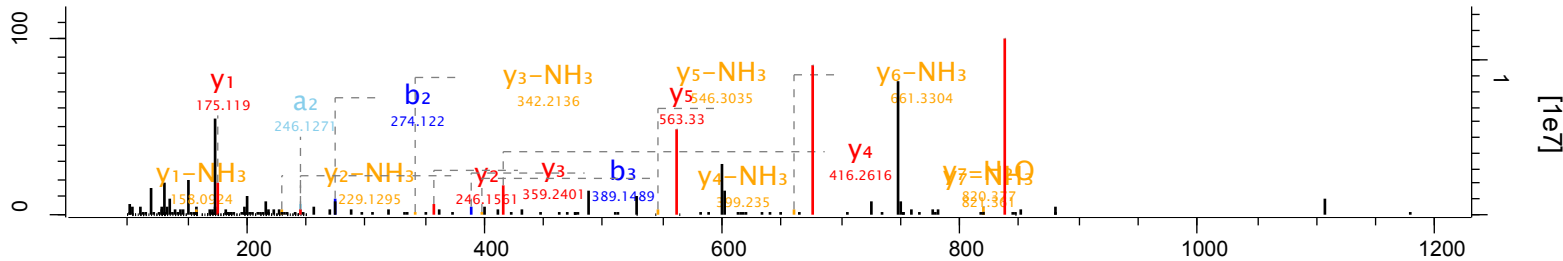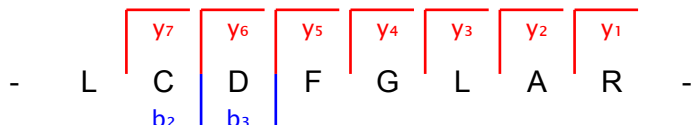

| Raw file                                   | Scan  | Method    | Score | m/z    | Gene names |
|--------------------------------------------|-------|-----------|-------|--------|------------|
| 20121215_EXQ1_AtDe_50CM_LFQ_myotubes_OG2_8 | 23723 | FTMS; HCD | 36.33 | 1032.5 | Prkaca     |

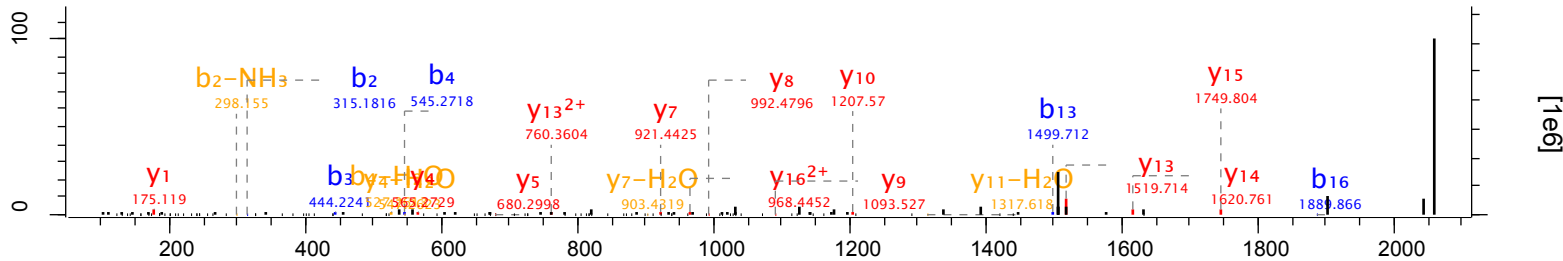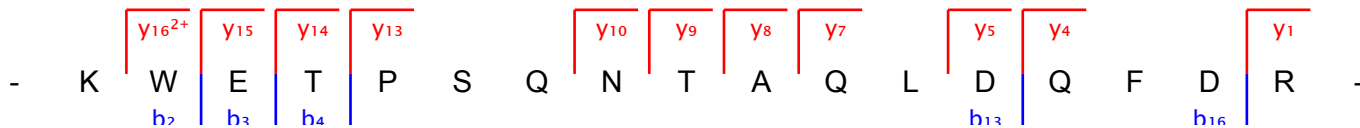

| Raw file                                   | Scan  | Method    | Score | m/z    | Gene names |
|--------------------------------------------|-------|-----------|-------|--------|------------|
| 20121215_EXQ1_AtDe_50CM_LFQ_myotubes_OG2_8 | 27113 | FTMS; HCD | 88.18 | 504.76 | Sept3      |

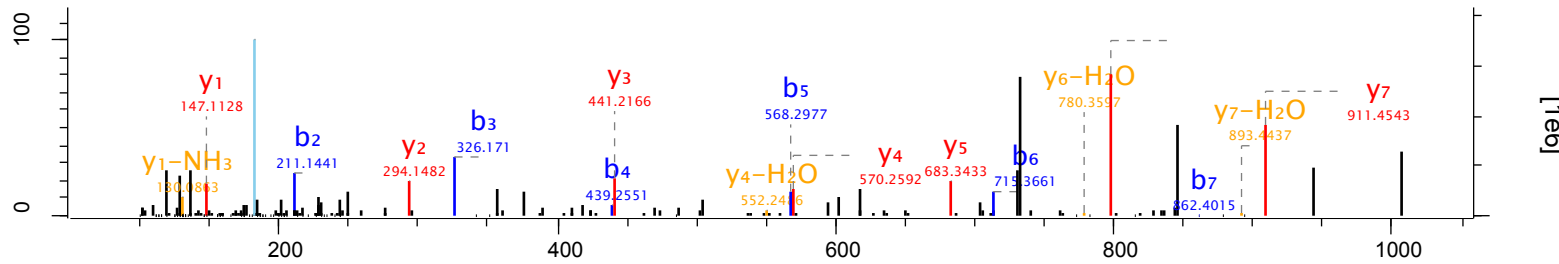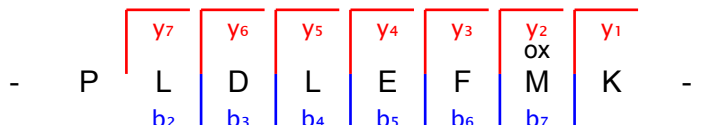

| Raw file                                   | Scan  | Method    | Score | m/z    | Gene names |
|--------------------------------------------|-------|-----------|-------|--------|------------|
| 20121215_EXQ1_AtDe_50CM_LFQ_myotubes_OG2_8 | 31672 | FTMS; HCD | 69.82 | 482.79 | Plch1      |

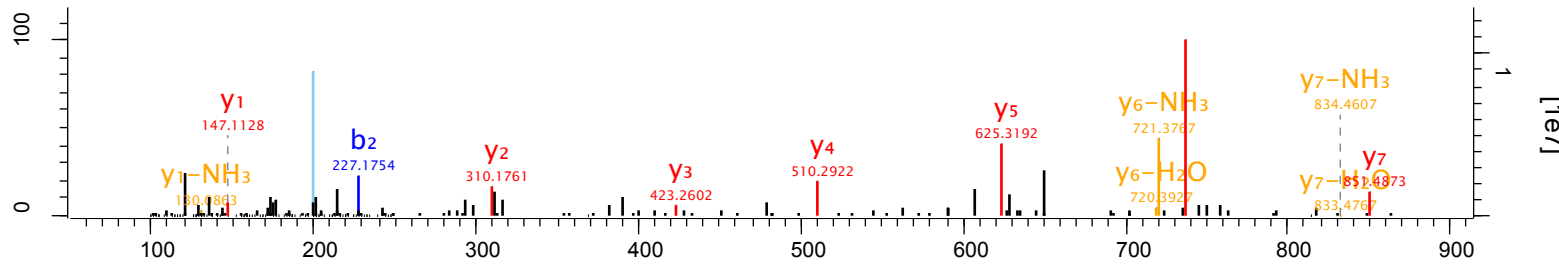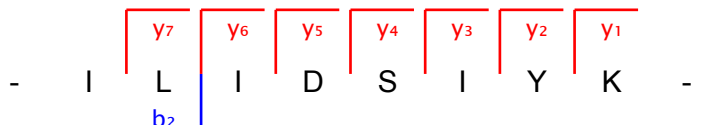

| Raw file                                   | Scan  | Method    | Score  | m/z   | Gene names |
|--------------------------------------------|-------|-----------|--------|-------|------------|
| 20121215_EXQ1_AtDe_50CM_LFQ_myotubes_OG2_8 | 32659 | FTMS; HCD | 113.27 | 559.3 | Lamtor4    |

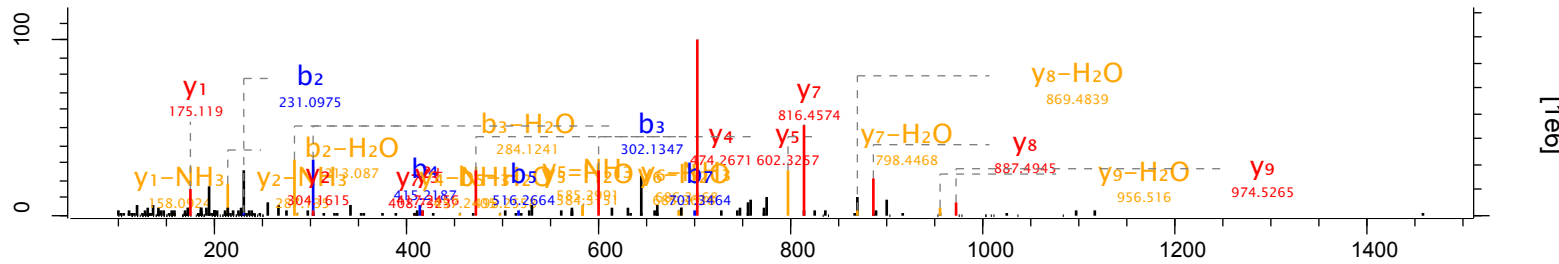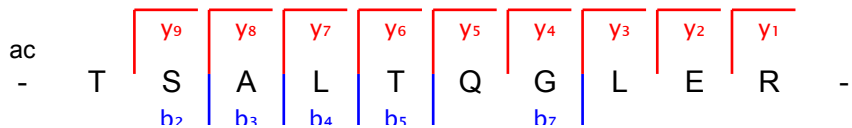



| Raw file                                   | Scan  | Method    | Score | m/z    | Gene names |
|--------------------------------------------|-------|-----------|-------|--------|------------|
| 20121215_EXQ1_AtDe_50CM_LFQ_myotubes_OG2_8 | 36433 | FTMS; HCD | 44.75 | 482.29 | Plch1      |

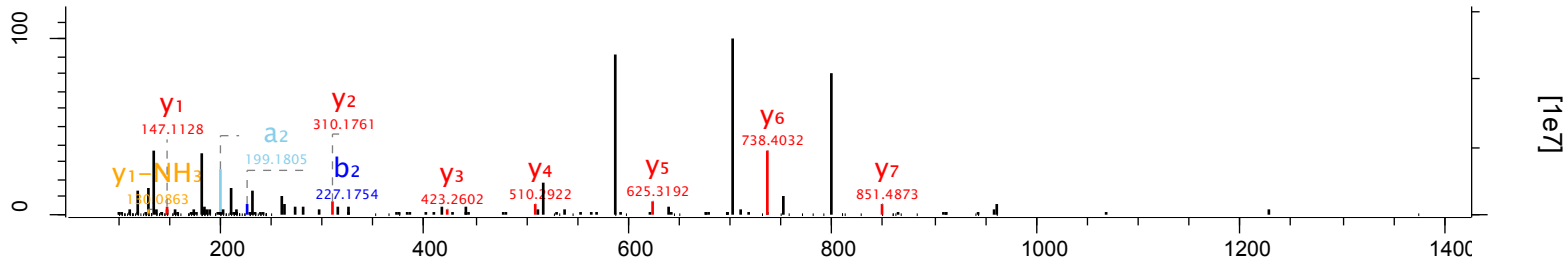

| Raw file                                   | Scan  | Method    | Score | m/z | Gene names |
|--------------------------------------------|-------|-----------|-------|-----|------------|
| 20121215_EXQ1_AtDe_50CM_LFQ_myotubes_OG2_8 | 37397 | FTMS; HCD | 83.79 | 881 | Krtcap2    |

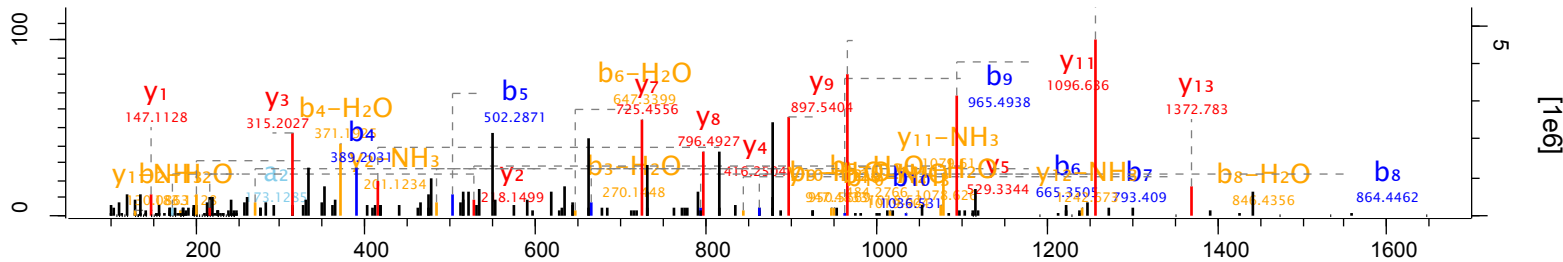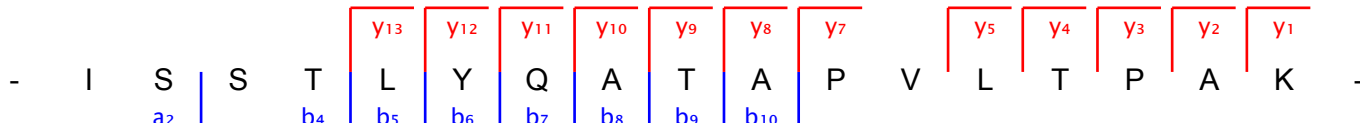

| Raw file                                   | Scan  | Method    | Score | m/z    | Gene names |
|--------------------------------------------|-------|-----------|-------|--------|------------|
| 20121215_EXQ1_AtDe_50CM_LFQ_myotubes_OG2_8 | 37464 | FTMS; HCD | 88.32 | 587.67 | Krtcap2    |

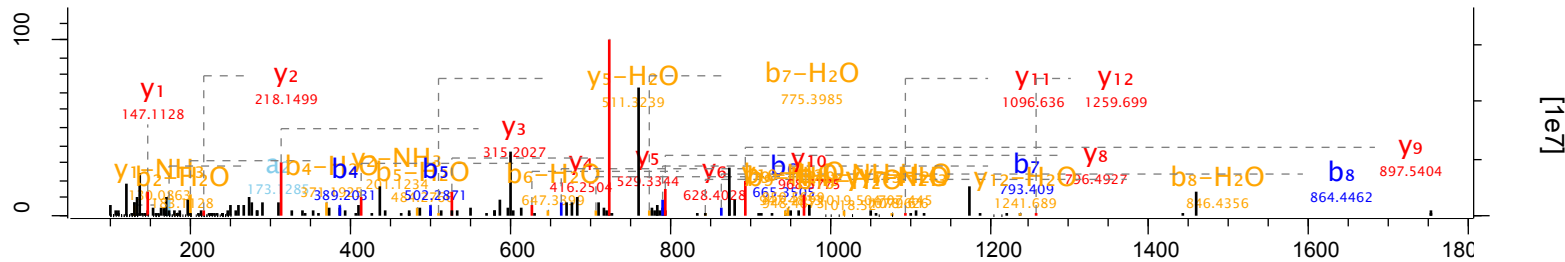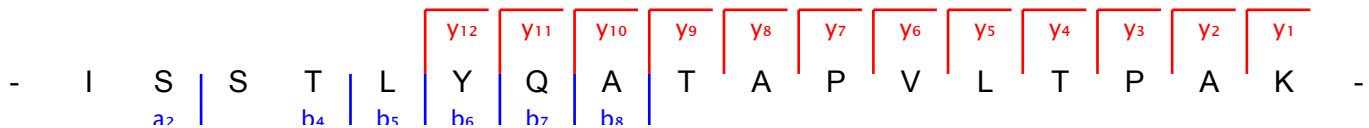

| Raw file                                   | Scan  | Method    | Score | m/z    | Gene names |
|--------------------------------------------|-------|-----------|-------|--------|------------|
| 20121215_EXQ1_AtDe_50CM_LFQ_myotubes_OG2_8 | 38024 | FTMS; HCD | 80.79 | 504.73 | Tmem258    |

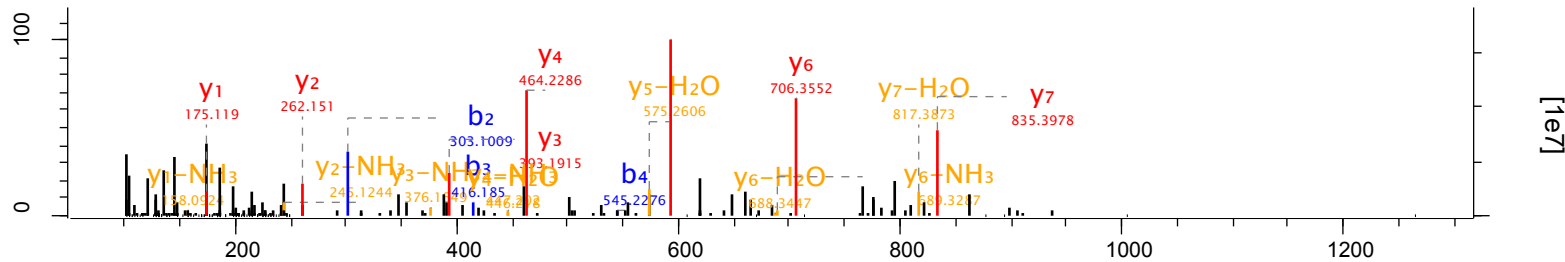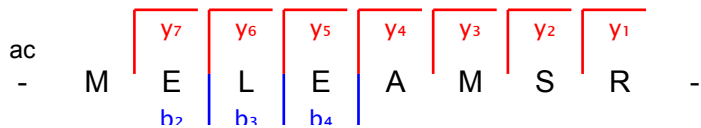



| Raw file                                   | Scan  | Method    | Score | m/z    | Gene names |
|--------------------------------------------|-------|-----------|-------|--------|------------|
| 20121215_EXQ1_AtDe_50CM_LFQ_myotubes_OG2_8 | 40168 | FTMS; HCD | 73.95 | 708.34 | Ndufa1     |

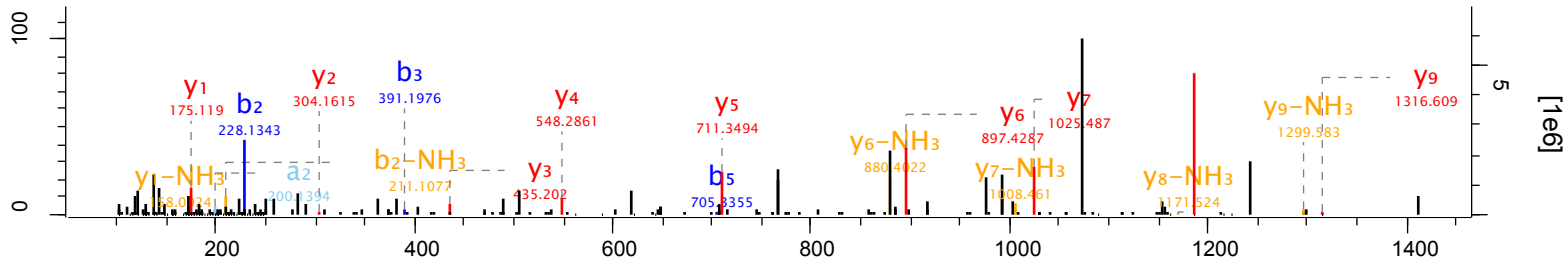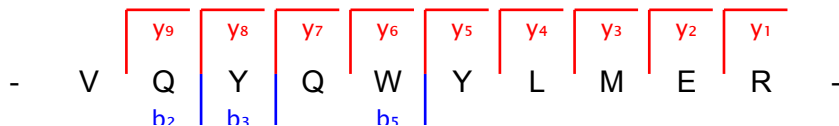

| Raw file                                   | Scan  | Method    | Score | m/z    | Gene names |
|--------------------------------------------|-------|-----------|-------|--------|------------|
| 20121215_EXQ1_AtDe_50CM_LFQ_myotubes_OG2_8 | 41728 | FTMS; HCD | 56.45 | 966.46 | Tmem128    |

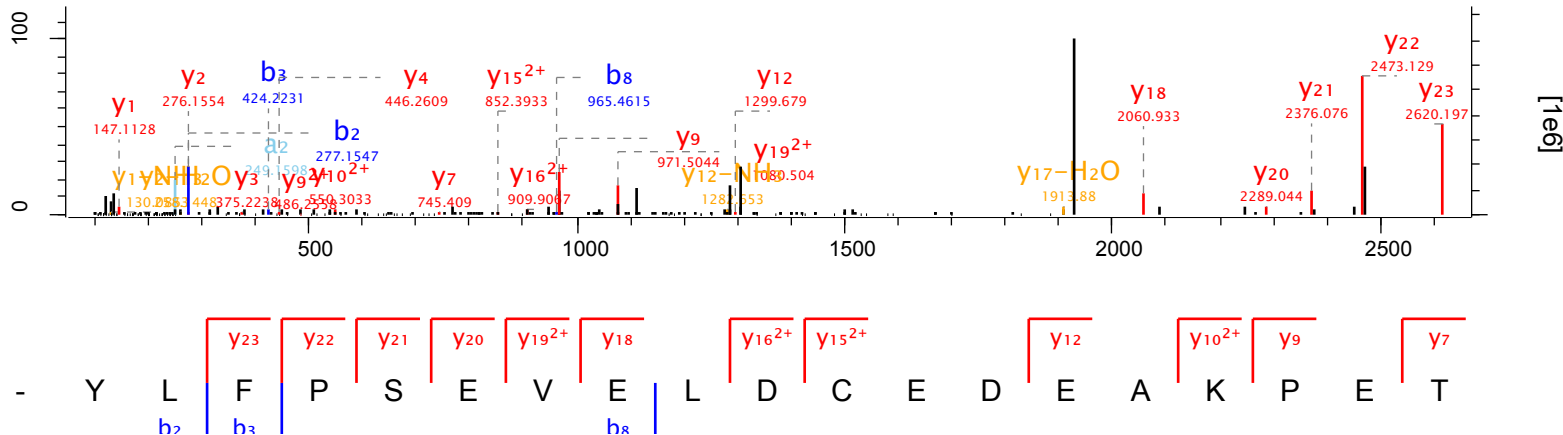

| Raw file                                   | Scan  | Method    | Score  | m/z    | Gene names |
|--------------------------------------------|-------|-----------|--------|--------|------------|
| 20121215_EXQ1_AtDe_50CM_LFQ_myotubes_OG2_8 | 47861 | FTMS; HCD | 122.19 | 760.03 | Cnih4      |

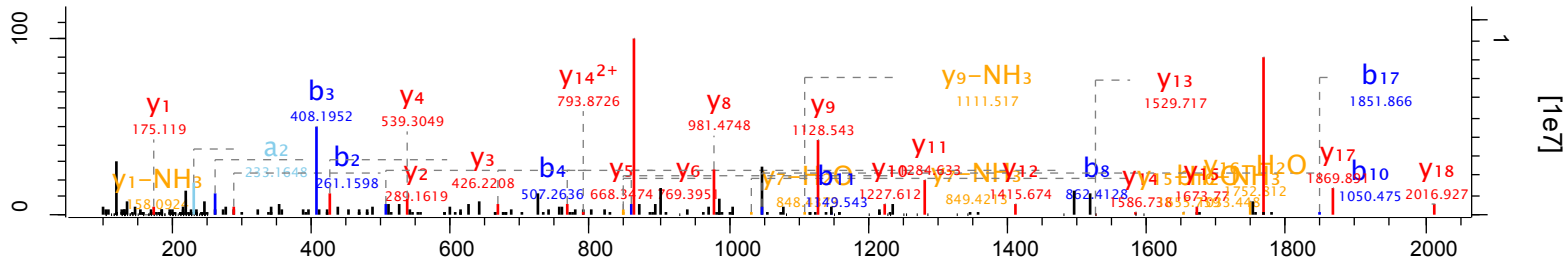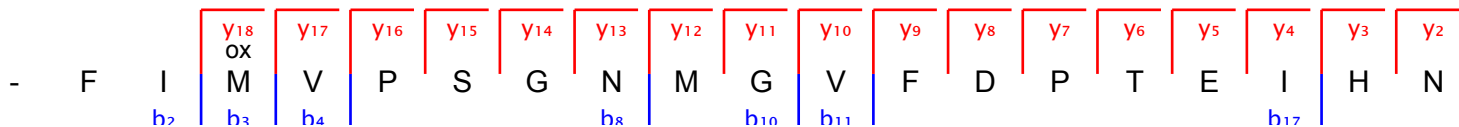



| Raw file                                   | Scan  | Method    | Score  | m/z   | Gene names |
|--------------------------------------------|-------|-----------|--------|-------|------------|
| 20121215_EXQ1_AtDe_50CM_LFQ_myotubes_OG2_8 | 51179 | FTMS; HCD | 106.92 | 754.7 | Cnih4      |

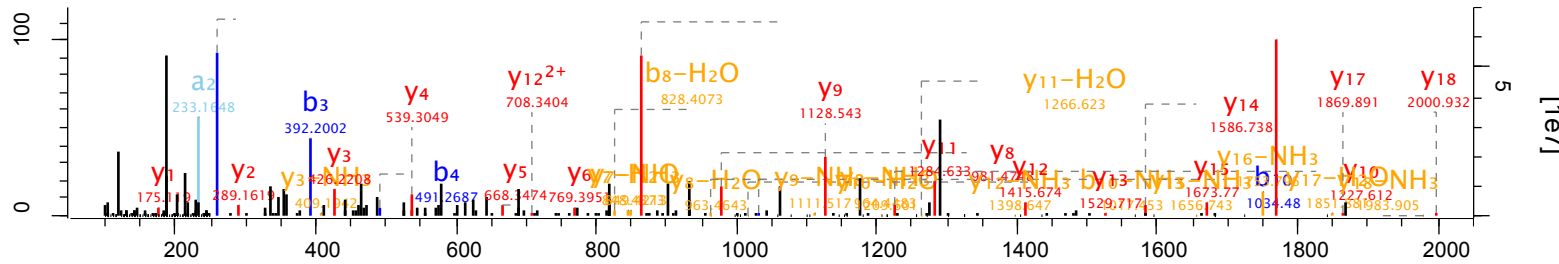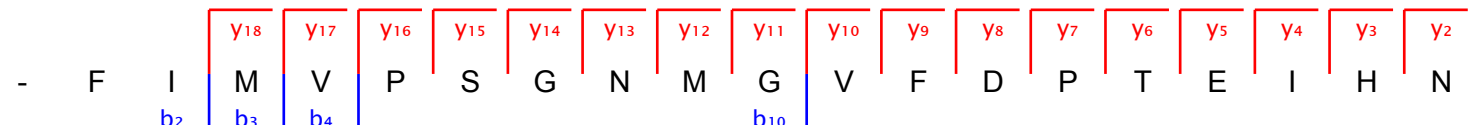

| Raw file                                   | Scan  | Method    | Score  | m/z     | Gene names |
|--------------------------------------------|-------|-----------|--------|---------|------------|
| 20121215_EXQ1_AtDe_50CM_LFQ_myotubes_OG2_8 | 51217 | FTMS; HCD | 117.48 | 1131.55 | Cnih4      |

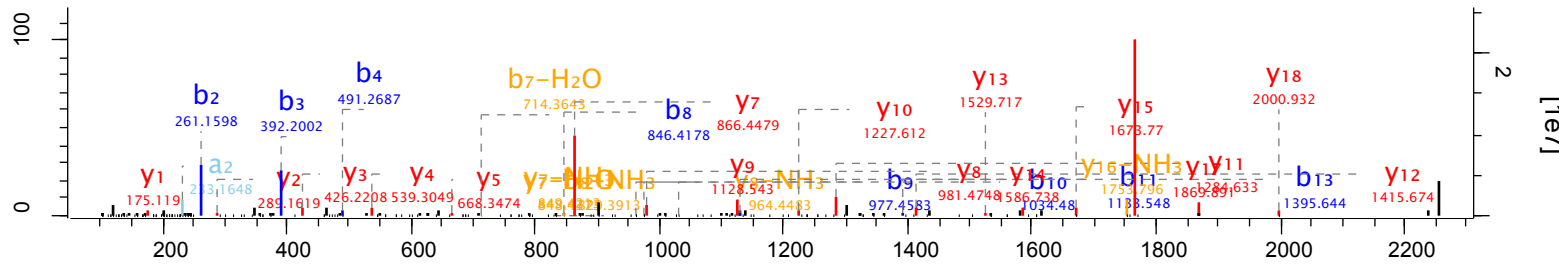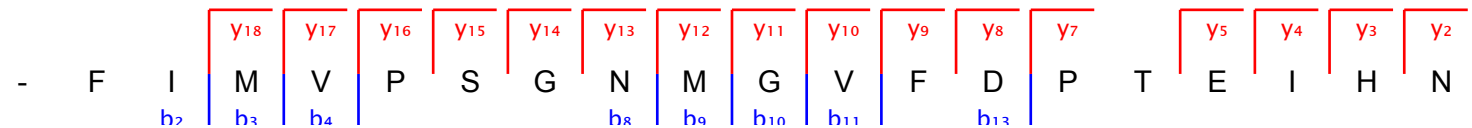

| Raw file                                   | Scan  | Method    | Score  | m/z    | Gene names |
|--------------------------------------------|-------|-----------|--------|--------|------------|
| 20121215_EXQ1_AtDe_50CM_LFQ_myotubes_OG2_8 | 55486 | FTMS; HCD | 125.36 | 697.41 | Atrx       |

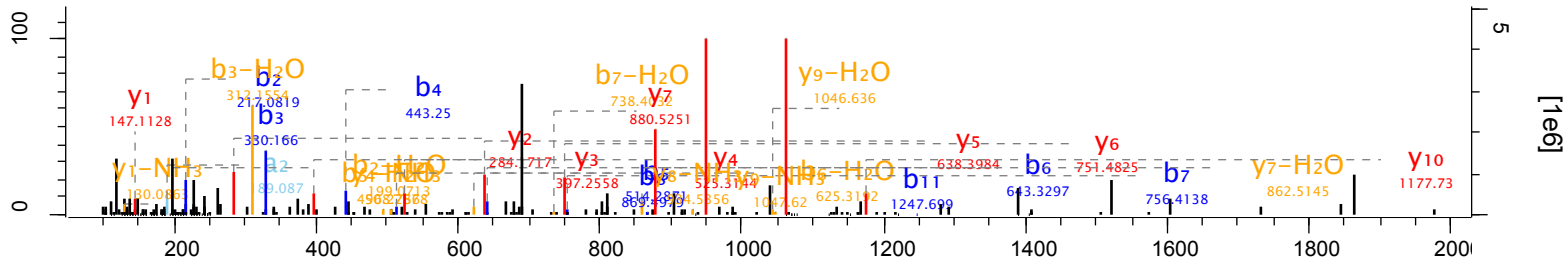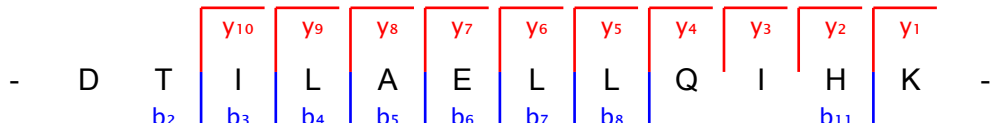

| Raw file                                   | Scan  | Method    | Score  | m/z    | Gene names |
|--------------------------------------------|-------|-----------|--------|--------|------------|
| 20121215_EXQ1_AtDe_50CM_LFQ_myotubes_OG2_8 | 56339 | FTMS; HCD | 111.52 | 715.91 | Uqcr11     |

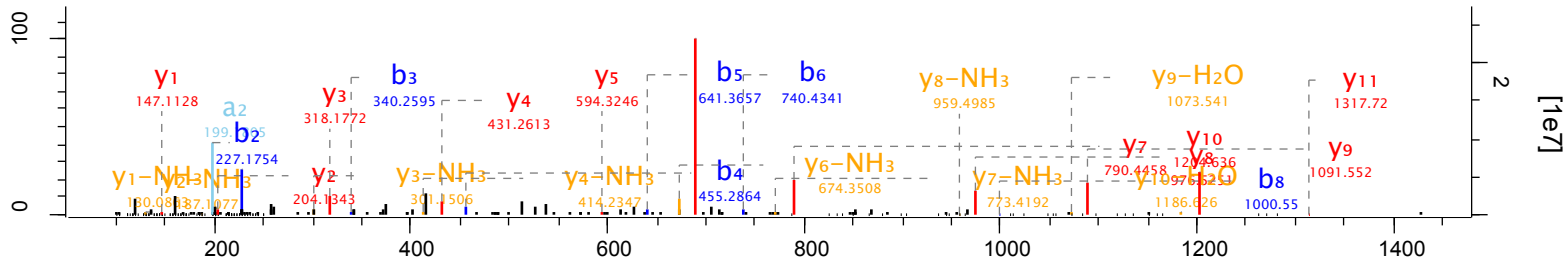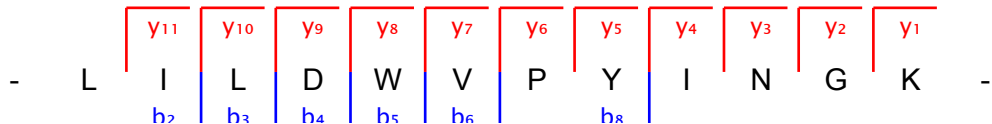

| Raw file                                   | Scan  | Method    | Score | m/z    | Gene names |
|--------------------------------------------|-------|-----------|-------|--------|------------|
| 20121215_EXQ1_AtDe_50CM_LFQ_myotubes_OG2_8 | 59496 | FTMS; HCD | 95.85 | 871.94 | Tomm7      |

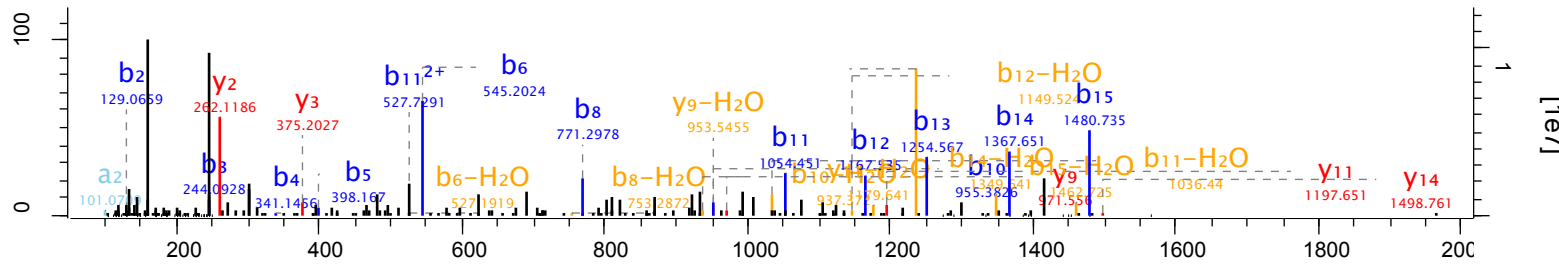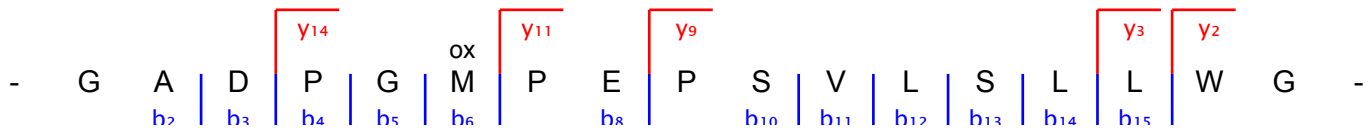

| Raw file                                   | Scan  | Method    | Score | m/z    | Gene names |
|--------------------------------------------|-------|-----------|-------|--------|------------|
| 20121215_EXQ1_AtDe_50CM_LFQ_myotubes_OG2_8 | 59928 | FTMS; HCD | 46.82 | 863.44 | Tomm7      |

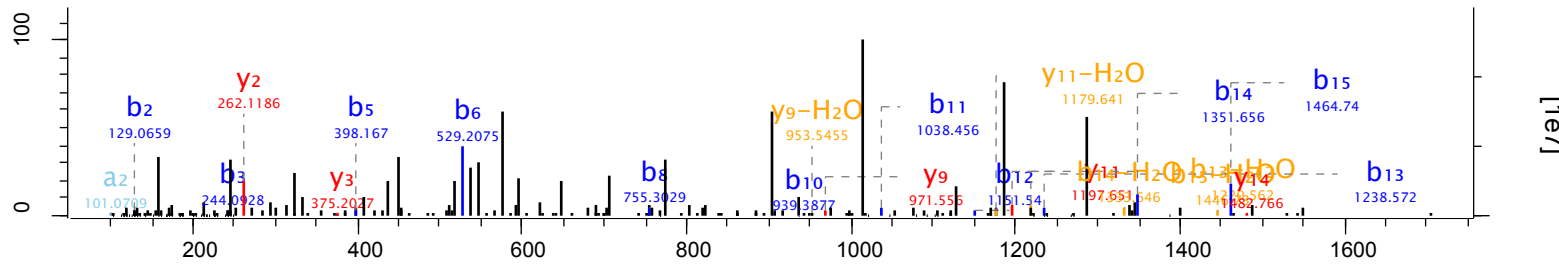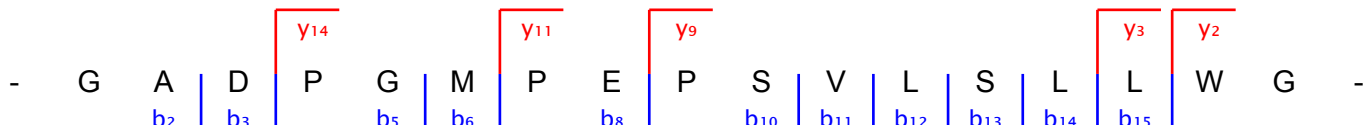



| Raw file                                   | Scan  | Method    | Score  | m/z    | Gene names  |
|--------------------------------------------|-------|-----------|--------|--------|-------------|
| 20121215_EXQ1_AtDe_50CM_LFQ_myotubes_OG2_9 | 17877 | FTMS; HCD | 165.78 | 797.91 | mt-Co3;Mtco |

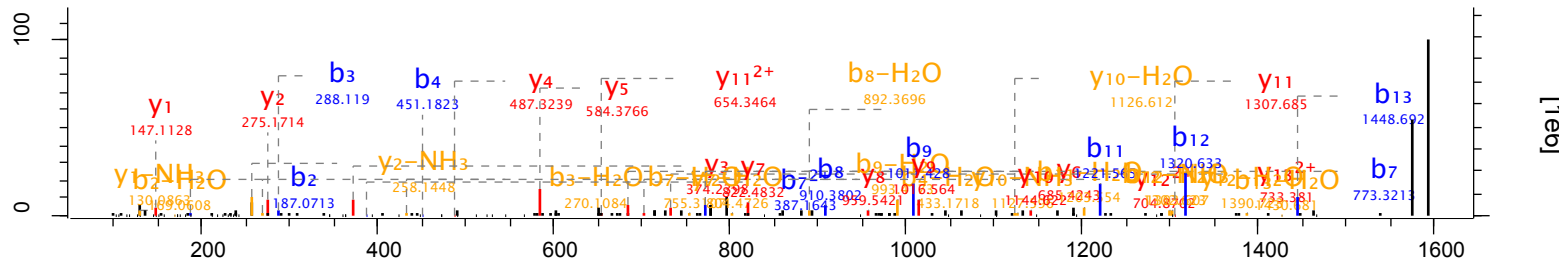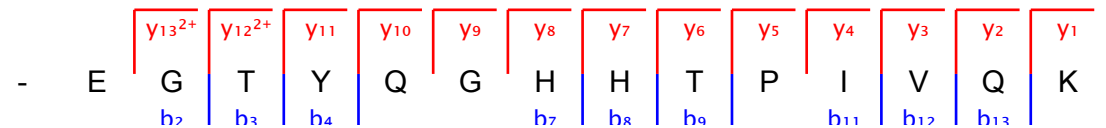



| Raw file                                   | Scan  | Method    | Score | m/z    | Gene names   |
|--------------------------------------------|-------|-----------|-------|--------|--------------|
| 20121215_EXQ1_AtDe_50CM_LFQ_myotubes_OG2_9 | 17882 | FTMS; HCD | 84.3  | 399.71 | mt-Co3;Mtco3 |

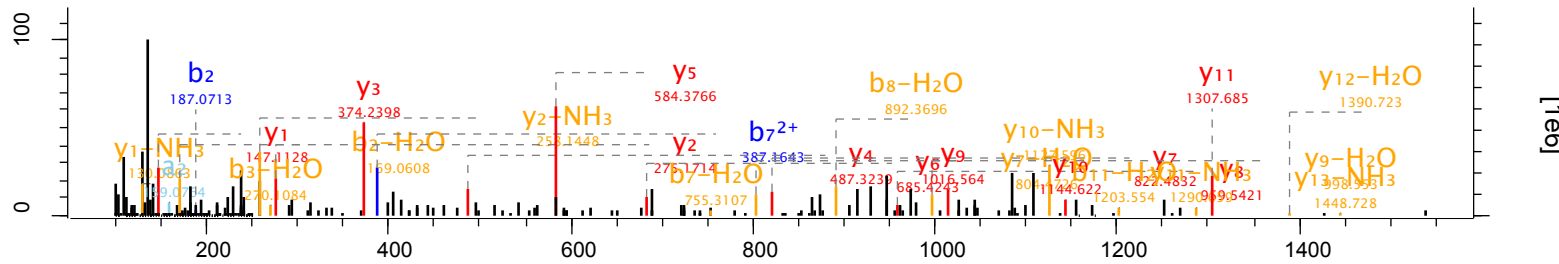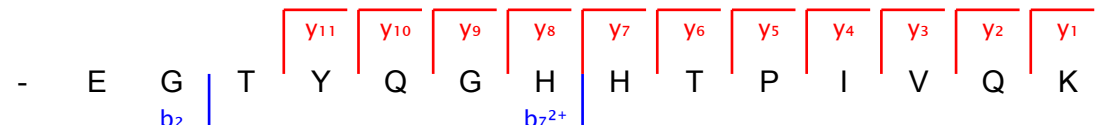

| Raw file                                   | Scan  | Method    | Score  | m/z    | Gene names  |
|--------------------------------------------|-------|-----------|--------|--------|-------------|
| 20121215_EXQ1_AtDe_50CM_LFQ_myotubes_OG2_9 | 17894 | FTMS; HCD | 113.53 | 532.27 | mt-Co3;Mtco |

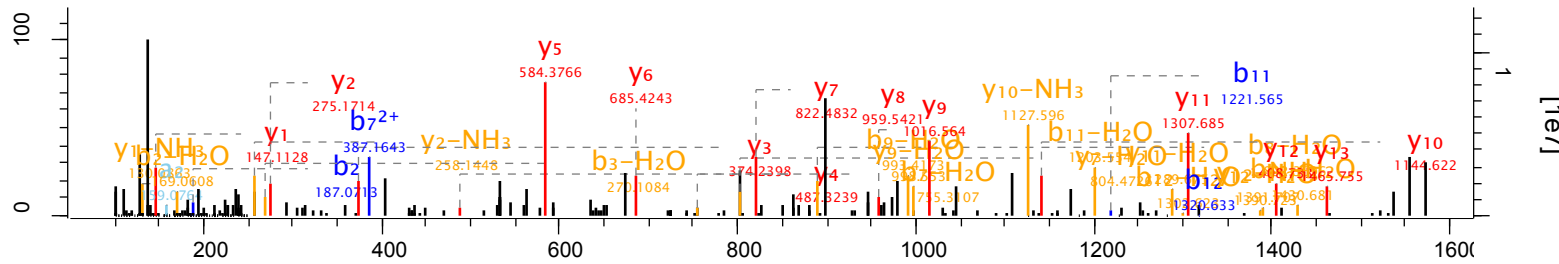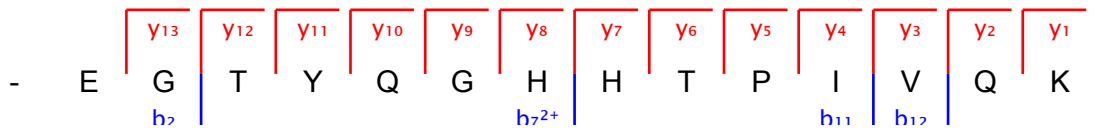

| Raw file                                   | Scan  | Method    | Score | m/z    | Gene names |
|--------------------------------------------|-------|-----------|-------|--------|------------|
| 20121215_EXQ1_AtDe_50CM_LFQ_myotubes_OG2_9 | 31399 | FTMS; HCD | 12.79 | 483.92 | Map4       |

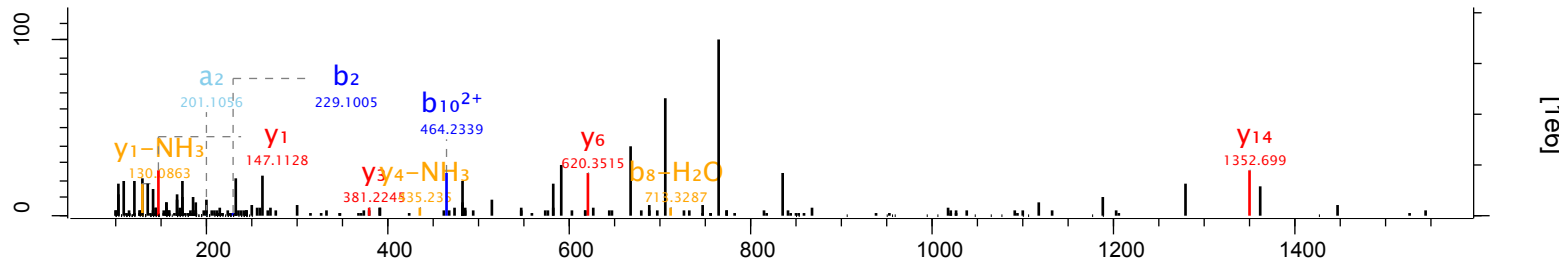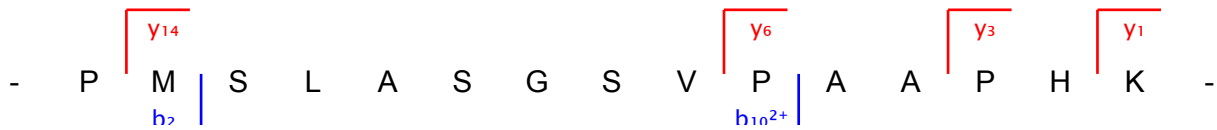

| Raw file                                   | Scan  | Method    | Score | m/z     | Gene names |
|--------------------------------------------|-------|-----------|-------|---------|------------|
| 20121215_EXQ1_AtDe_50CM_LFQ_myotubes_OG2_9 | 35137 | FTMS; HCD | 87.89 | 1083.15 | Hmgn1      |

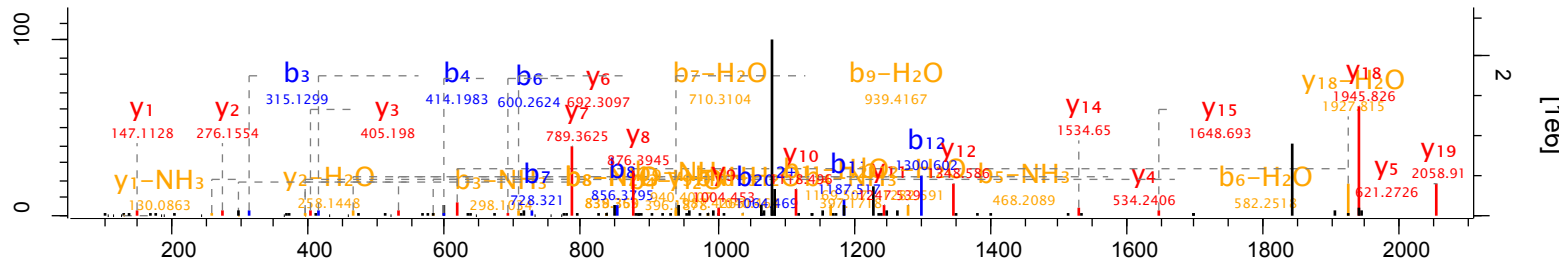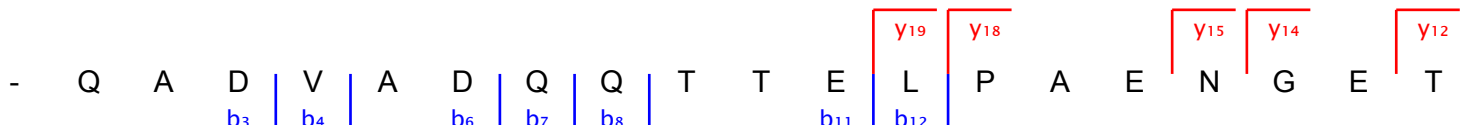

| Raw file                                   | Scan  | Method    | Score  | m/z    | Gene names |
|--------------------------------------------|-------|-----------|--------|--------|------------|
| 20121215_EXQ1_AtDe_50CM_LFQ_myotubes_OG2_9 | 36097 | FTMS; HCD | 108.15 | 436.59 | Rpl39      |

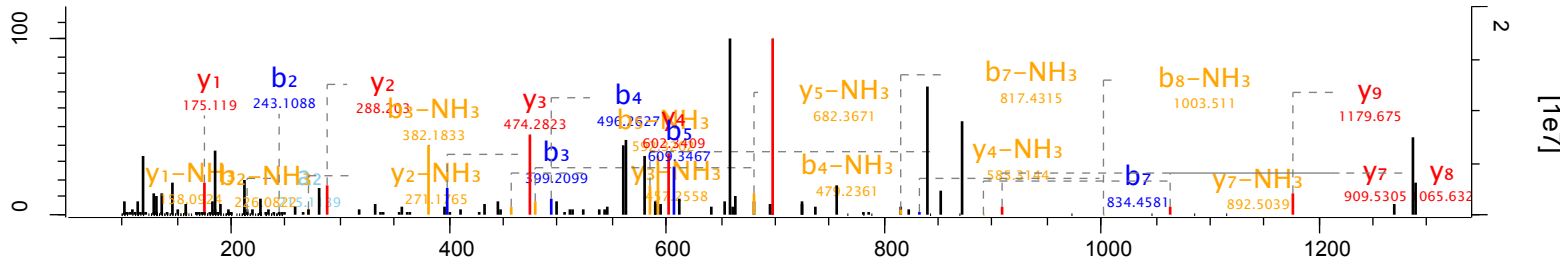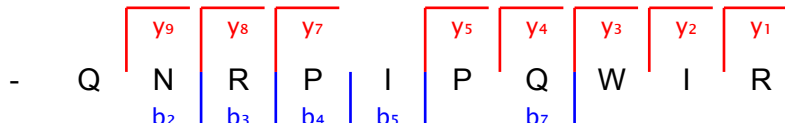

| Raw file                                   | Scan  | Method    | Score  | m/z    | Gene names |
|--------------------------------------------|-------|-----------|--------|--------|------------|
| 20121215_EXQ1_AtDe_50CM_LFQ_myotubes_OG2_9 | 36745 | FTMS; HCD | 115.12 | 705.34 | Vkorc1     |

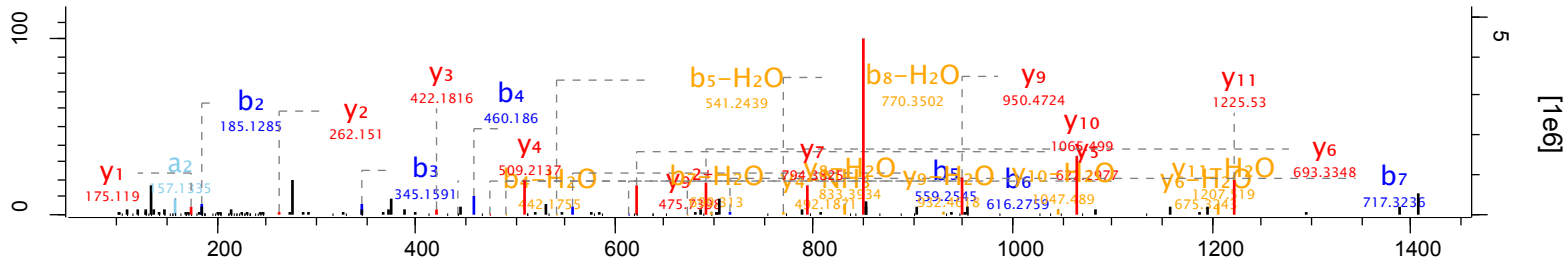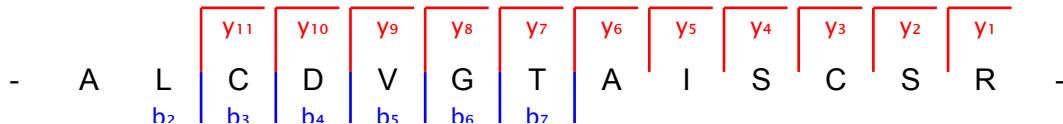

| Raw file                                   | Scan  | Method    | Score | m/z    | Gene names |
|--------------------------------------------|-------|-----------|-------|--------|------------|
| 20121215_EXQ1_AtDe_50CM_LFQ_myotubes_OG2_9 | 38759 | FTMS; HCD | 94.87 | 476.24 | Mapk15     |

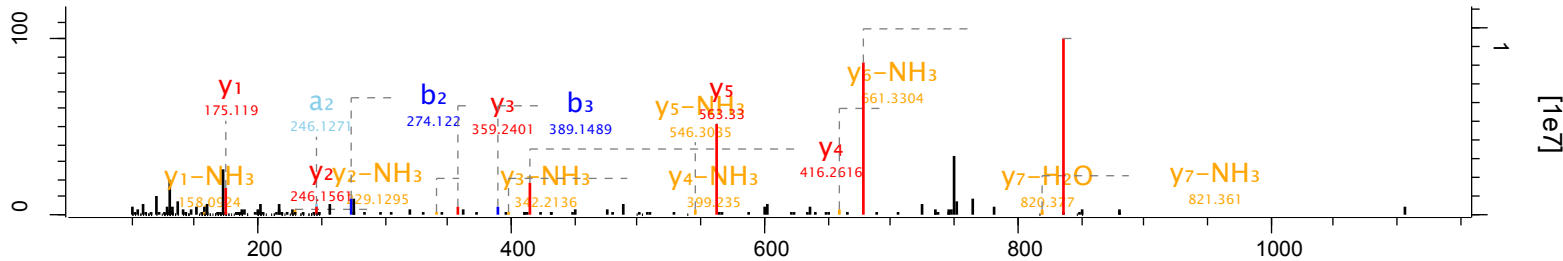

Raw file

20121215\_EXQ1\_AtDe\_50CM\_LFQ\_myotubes\_OG2\_9

Scan

39800

Method

FTMS; HCD

Score

82.45

m/z

524.78

Gene names

4933433C11R

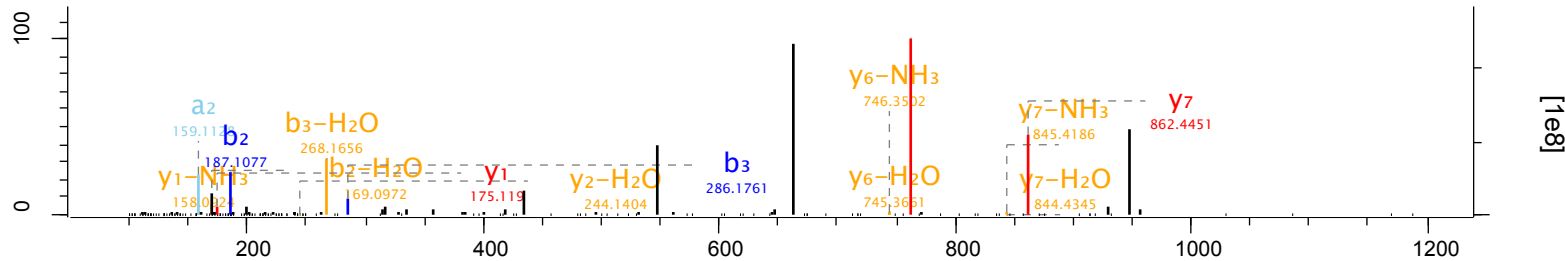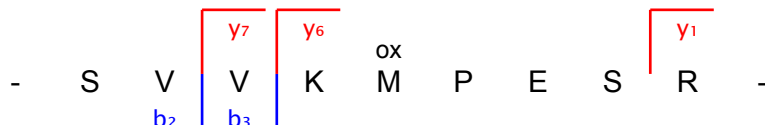



| Raw file                                   | Scan  | Method    | Score  | m/z    | Gene names |
|--------------------------------------------|-------|-----------|--------|--------|------------|
| 20121215_EXQ1_AtDe_50CM_LFQ_myotubes_OG2_9 | 45043 | FTMS; HCD | 108.74 | 504.76 | Sept3      |

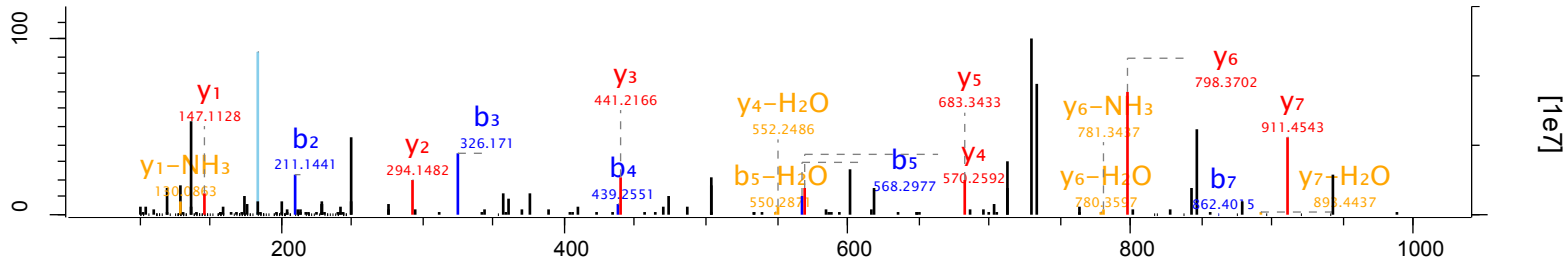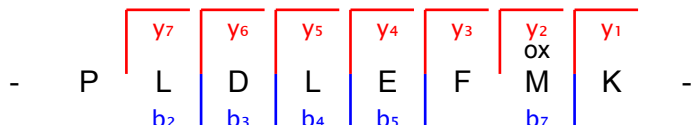

Raw file

20121215\_EXQ1\_AtDe\_50CM\_LFQ\_myotubes\_OG2\_9

Scan

49445

Method

FTMS; HCD

Score

82.45

m/z

482.79

Gene names

Plch1

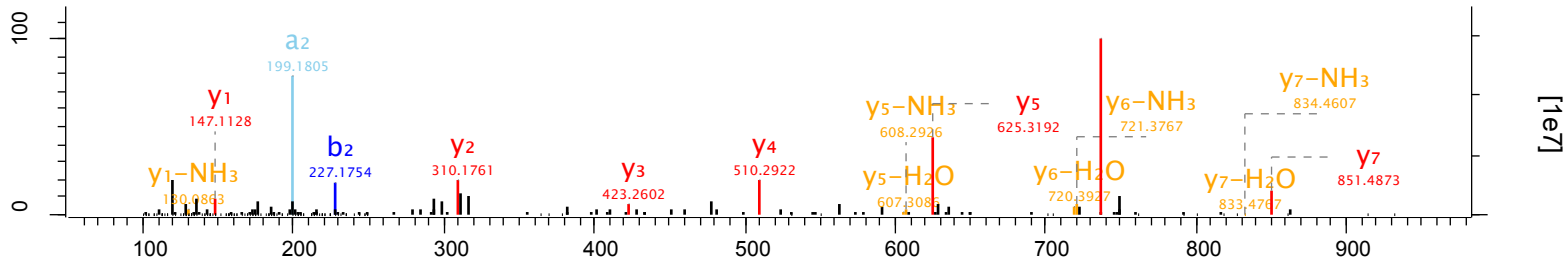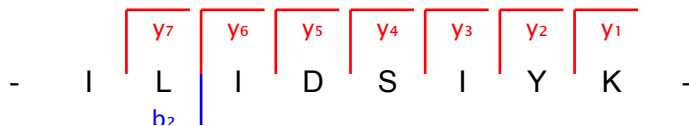

| Raw file                                   | Scan  | Method    | Score  | m/z   | Gene names |
|--------------------------------------------|-------|-----------|--------|-------|------------|
| 20121215_EXQ1_AtDe_50CM_LFQ_myotubes_OG2_9 | 50392 | FTMS; HCD | 169.58 | 559.3 | Lamtor4    |

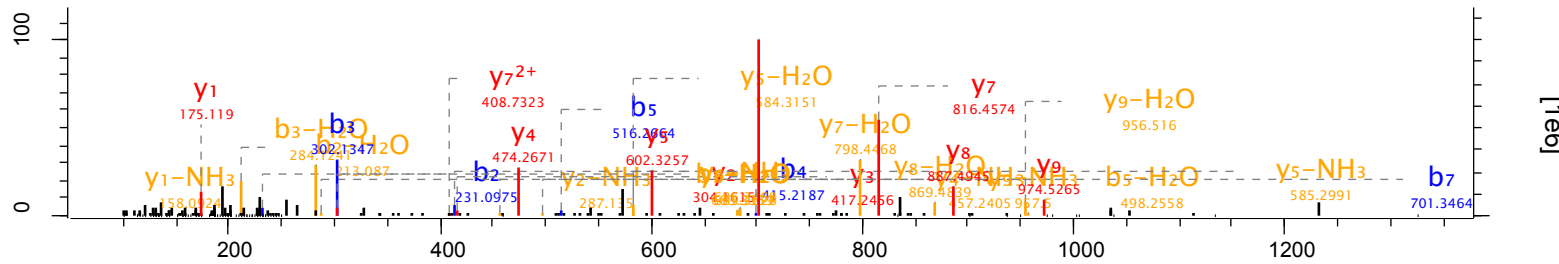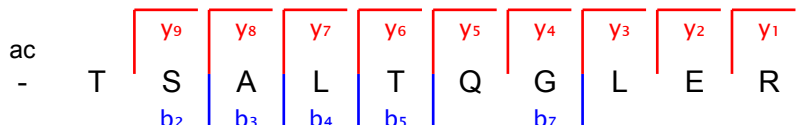

Raw file

20121215\_EXQ1\_AtDe\_50CM\_LFQ\_myotubes\_OG2\_9

Scan

54313

Method

FTMS; HCD

Score

56.38

m/z

482.79

Gene names

Plch1

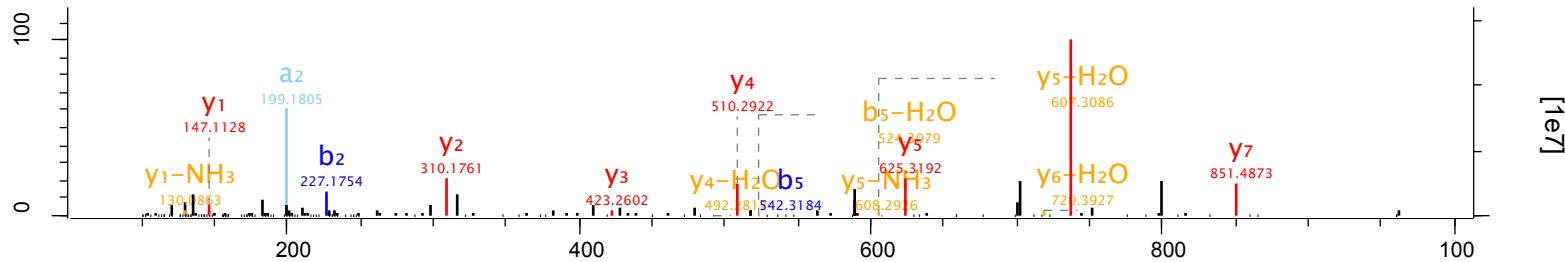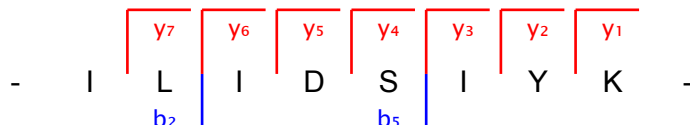

| Raw file                                   | Scan  | Method    | Score | m/z | Gene names |
|--------------------------------------------|-------|-----------|-------|-----|------------|
| 20121215_EXQ1_AtDe_50CM_LFQ_myotubes_OG2_9 | 55279 | FTMS; HCD | 82.45 | 881 | Krtcap2    |

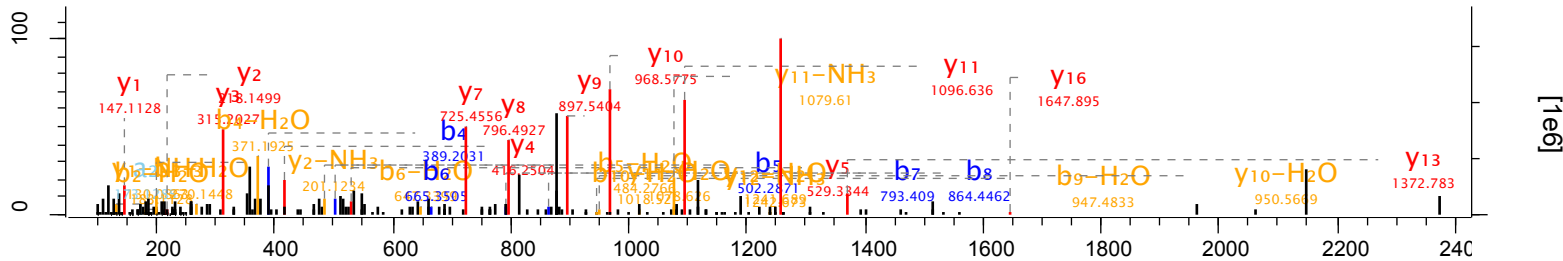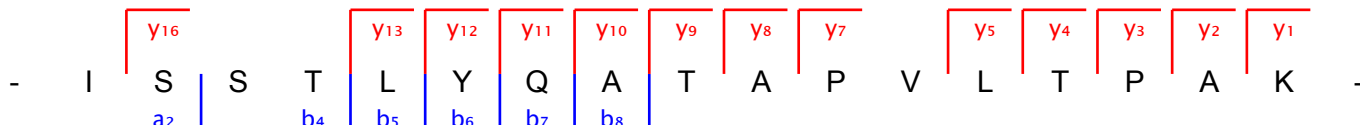

| Raw file                                   | Scan  | Method    | Score | m/z    | Gene names |
|--------------------------------------------|-------|-----------|-------|--------|------------|
| 20121215_EXQ1_AtDe_50CM_LFQ_myotubes_OG2_9 | 55323 | FTMS; HCD | 81.01 | 587.67 | Krtcap2    |

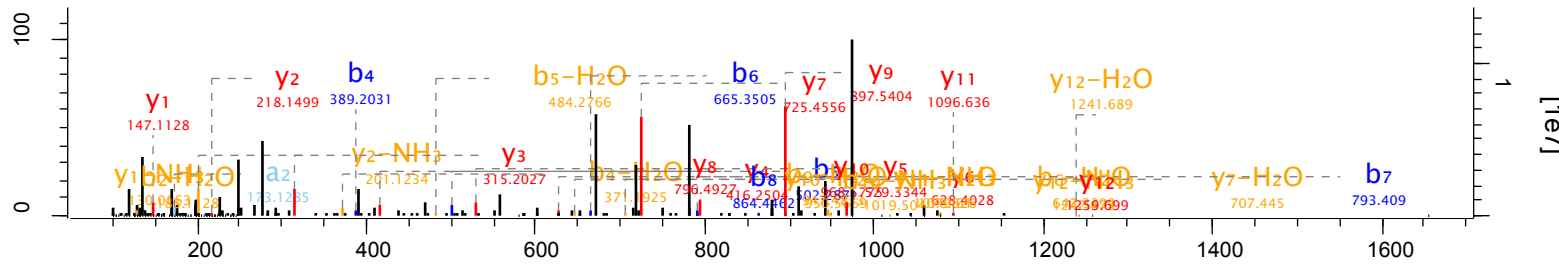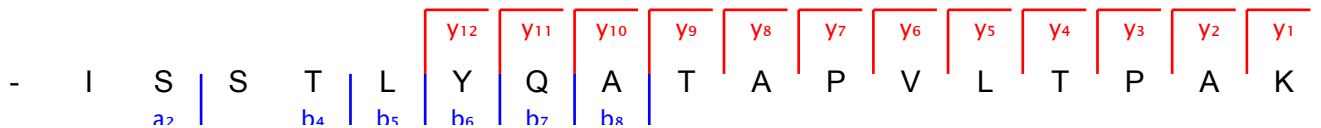

| Raw file                                   | Scan  | Method    | Score | m/z    | Gene names |
|--------------------------------------------|-------|-----------|-------|--------|------------|
| 20121215_EXQ1_AtDe_50CM_LFQ_myotubes_OG2_9 | 56885 | FTMS; HCD | 96.95 | 496.76 | Sept3      |

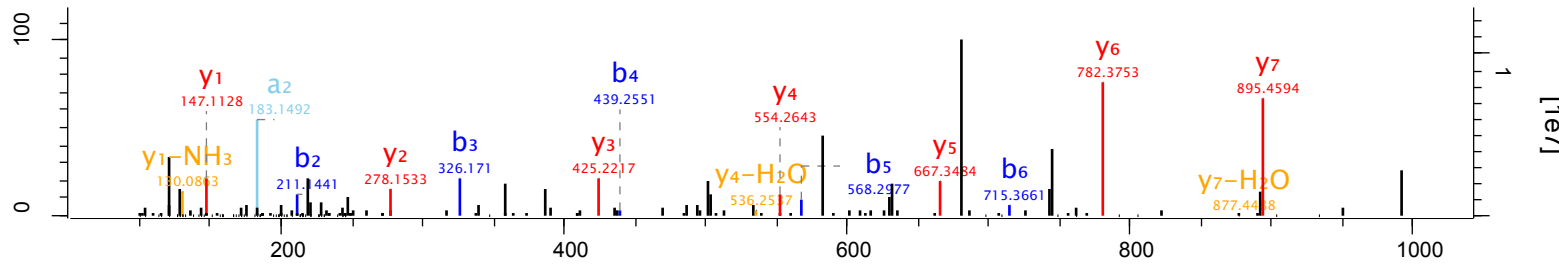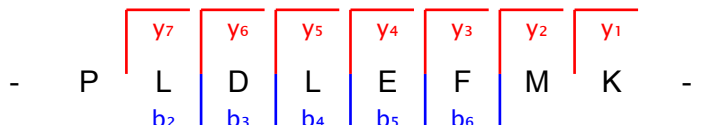

| Raw file                                   | Scan  | Method    | Score | m/z    | Gene names |
|--------------------------------------------|-------|-----------|-------|--------|------------|
| 20121215_EXQ1_AtDe_50CM_LFQ_myotubes_OG2_9 | 56940 | FTMS; HCD | 75.76 | 504.28 | Rtn2       |

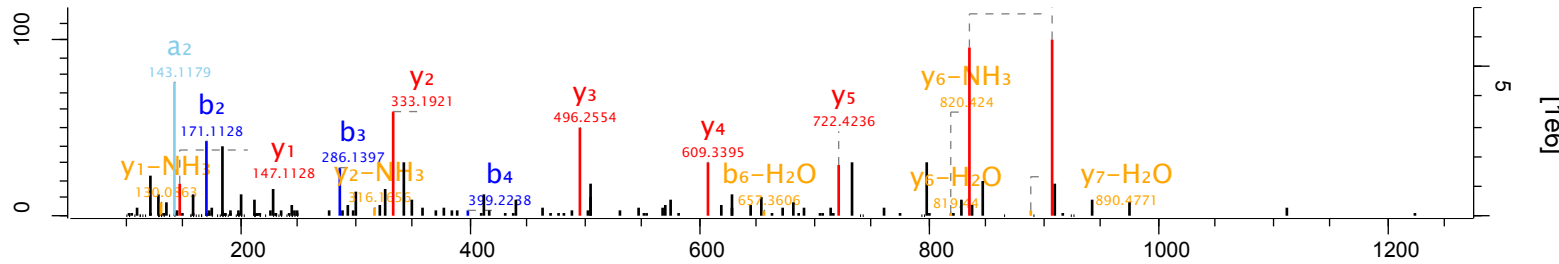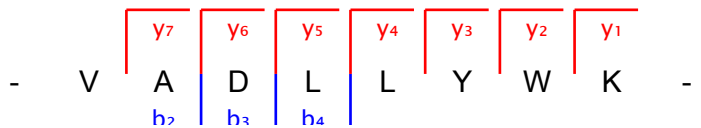



| Raw file                                   | Scan  | Method    | Score | m/z    | Gene names |
|--------------------------------------------|-------|-----------|-------|--------|------------|
| 20121215_EXQ1_AtDe_50CM_LFQ_myotubes_OG2_9 | 59531 | FTMS; HCD | 45.1  | 966.46 | Tmem128    |

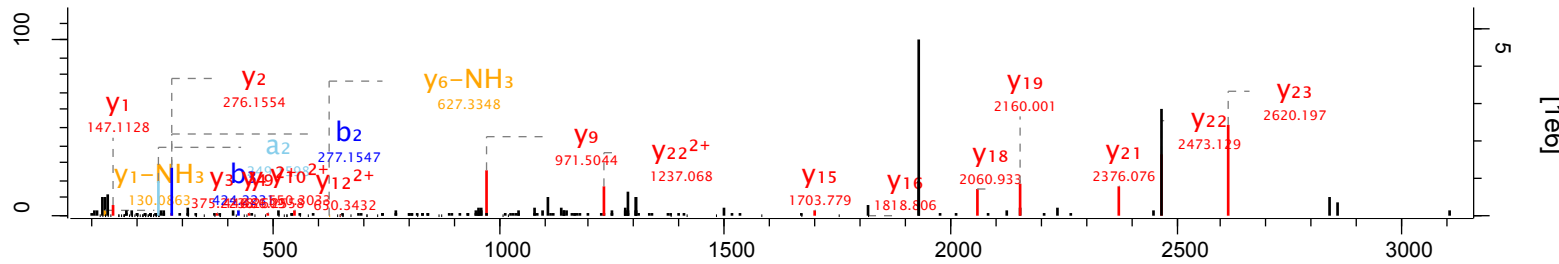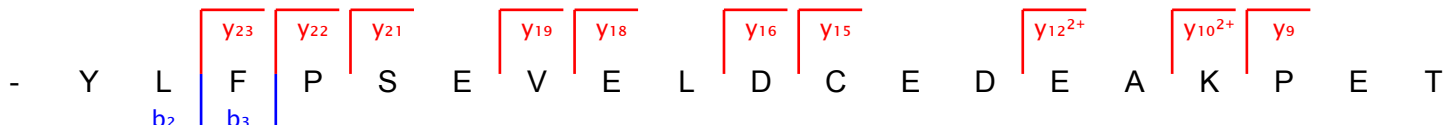

| Raw file                                   | Scan  | Method    | Score | m/z    | Gene names |
|--------------------------------------------|-------|-----------|-------|--------|------------|
| 20121215_EXQ1_AtDe_50CM_LFQ_myotubes_OG2_9 | 65675 | FTMS; HCD | 140.2 | 760.03 | Cnih4      |

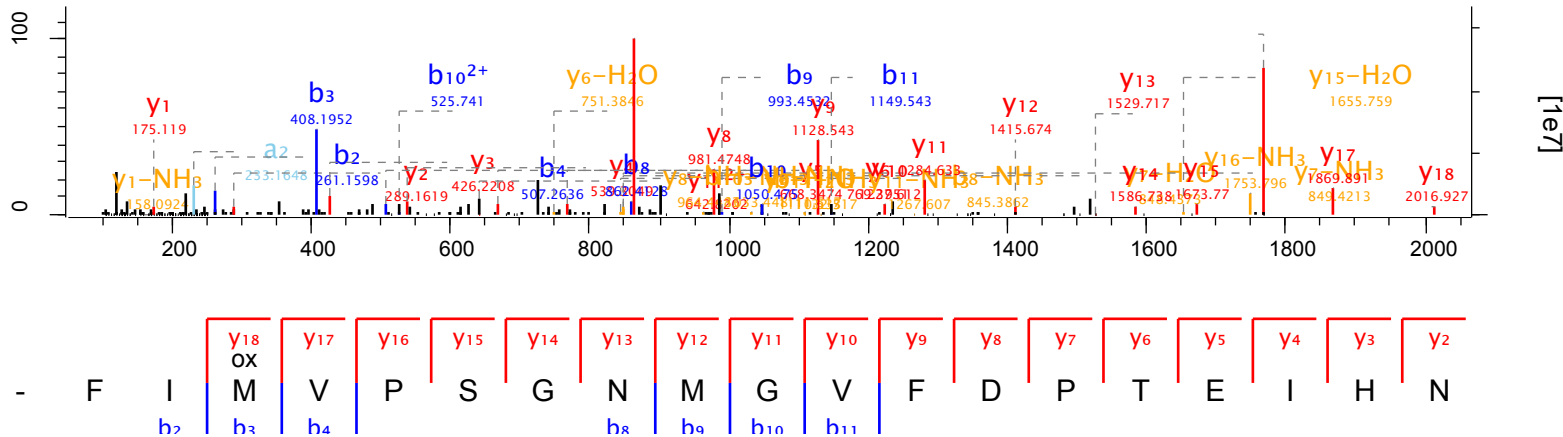

| Raw file                                   | Scan  | Method    | Score  | m/z   | Gene names |
|--------------------------------------------|-------|-----------|--------|-------|------------|
| 20121215_EXQ1_AtDe_50CM_LFQ_myotubes_OG2_9 | 68843 | FTMS; HCD | 102.07 | 754.7 | Cnih4      |

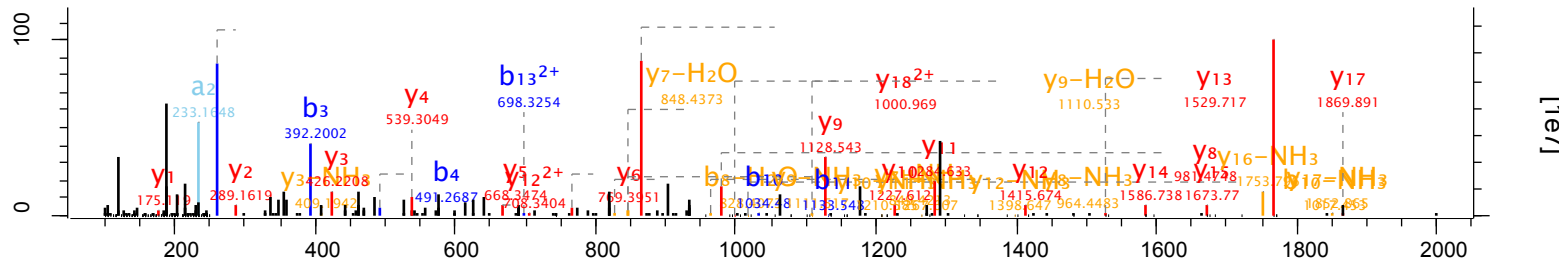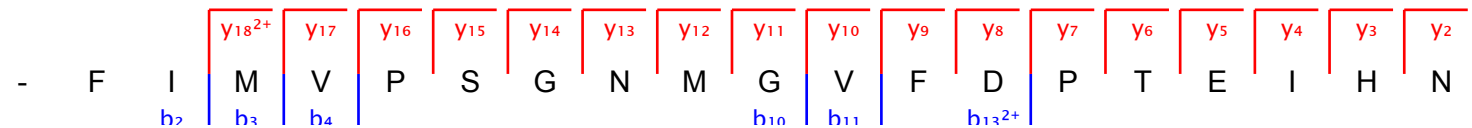

| Raw file                                   | Scan  | Method    | Score | m/z     | Gene names |
|--------------------------------------------|-------|-----------|-------|---------|------------|
| 20121215_EXQ1_AtDe_50CM_LFQ_myotubes_OG2_9 | 68885 | FTMS; HCD | 83.42 | 1132.05 | Cnih4      |

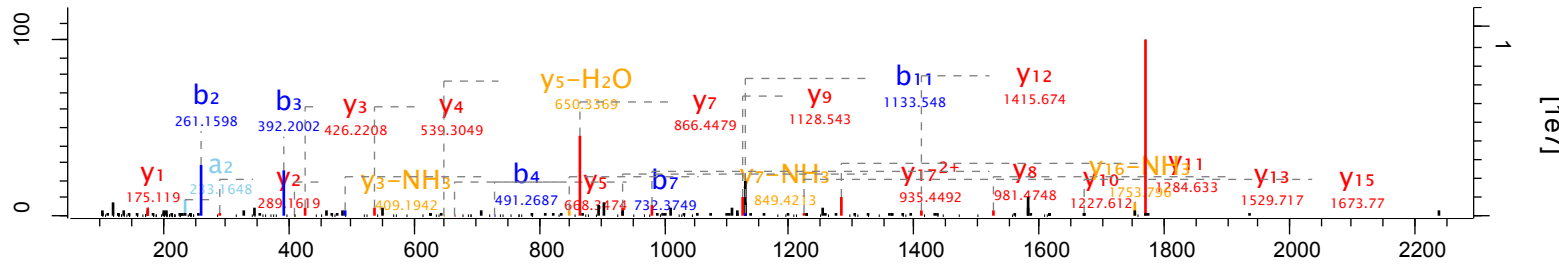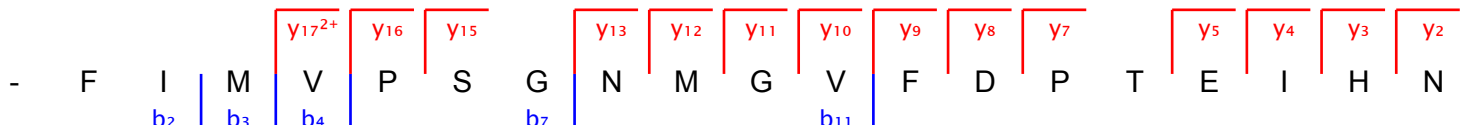

| Raw file                                   | Scan  | Method    | Score | m/z     | Gene names |
|--------------------------------------------|-------|-----------|-------|---------|------------|
| 20121215_EXQ1_AtDe_50CM_LFQ_myotubes_OG2_9 | 74679 | FTMS; HCD | 101.1 | 1207.61 | Ly6a       |

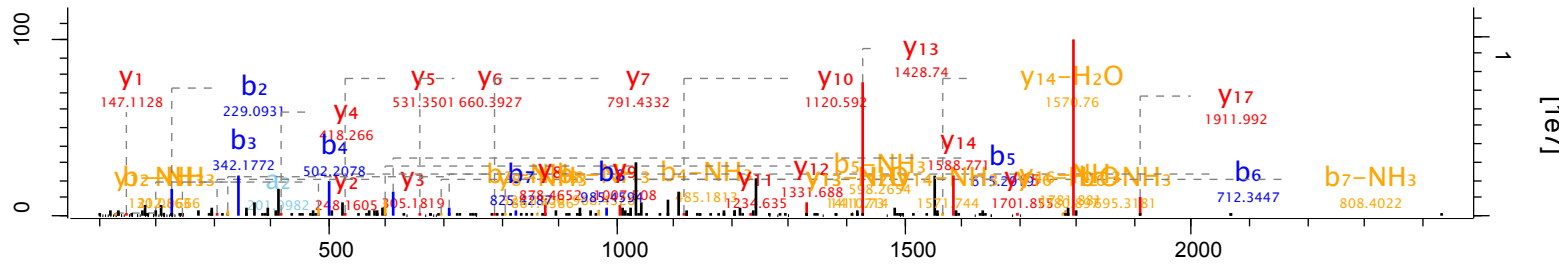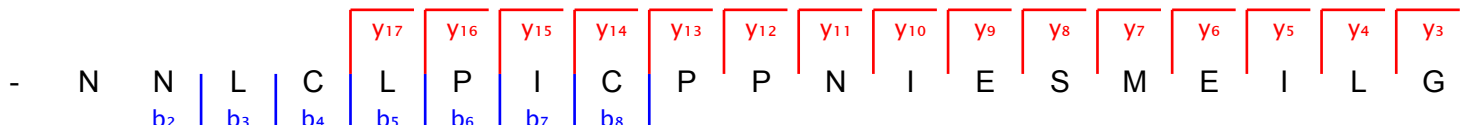

| Raw file                                   | Scan  | Method    | Score | m/z    | Gene names |
|--------------------------------------------|-------|-----------|-------|--------|------------|
| 20121215_EXQ1_AtDe_50CM_LFQ_myotubes_OG2_9 | 77071 | FTMS; HCD | 84.76 | 871.43 | Tomm7      |

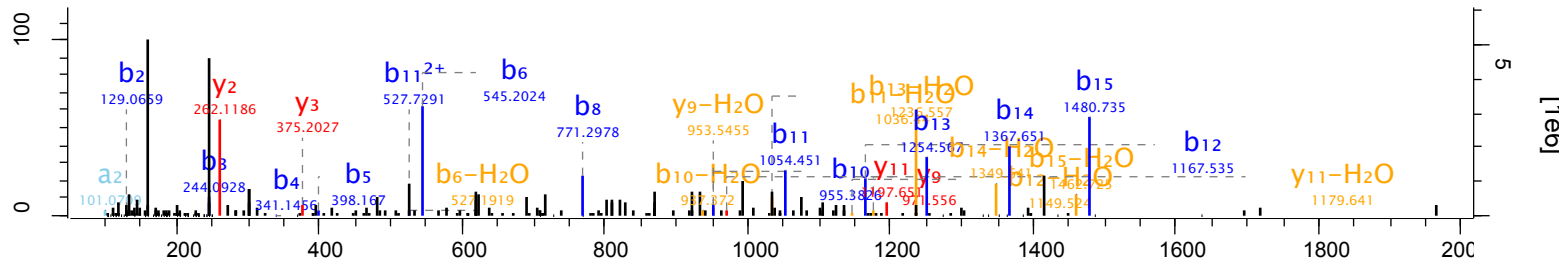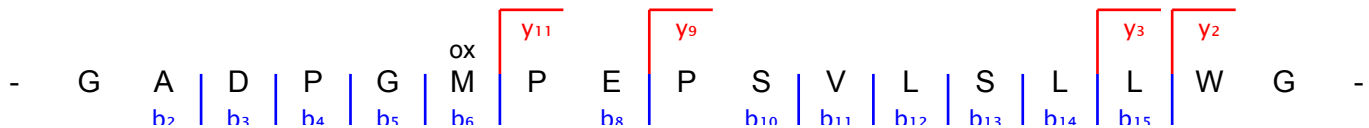

| Raw file                                   | Scan  | Method    | Score  | m/z    | Gene names |
|--------------------------------------------|-------|-----------|--------|--------|------------|
| 20121216_EXQ1_AtDe_50CM_LFQ_myotubes_OG3_1 | 12636 | FTMS; HCD | 143.31 | 720.31 | Leptot11   |

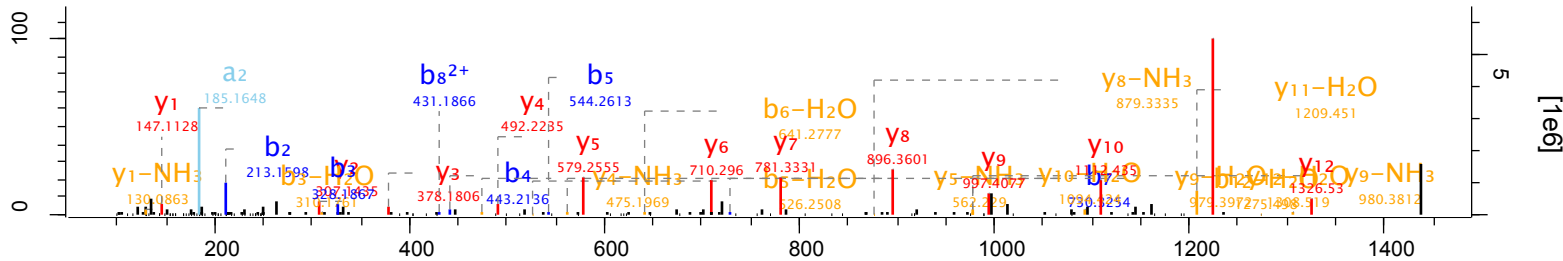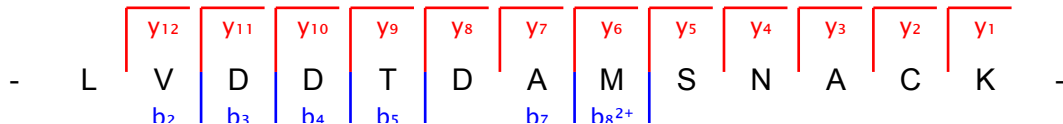

| Raw file                                   | Scan  | Method    | Score  | m/z    | Gene names |
|--------------------------------------------|-------|-----------|--------|--------|------------|
| 20121216_EXQ1_AtDe_50CM_LFQ_myotubes_OG3_1 | 12777 | FTMS; HCD | 129.37 | 646.33 | Mkrn1      |

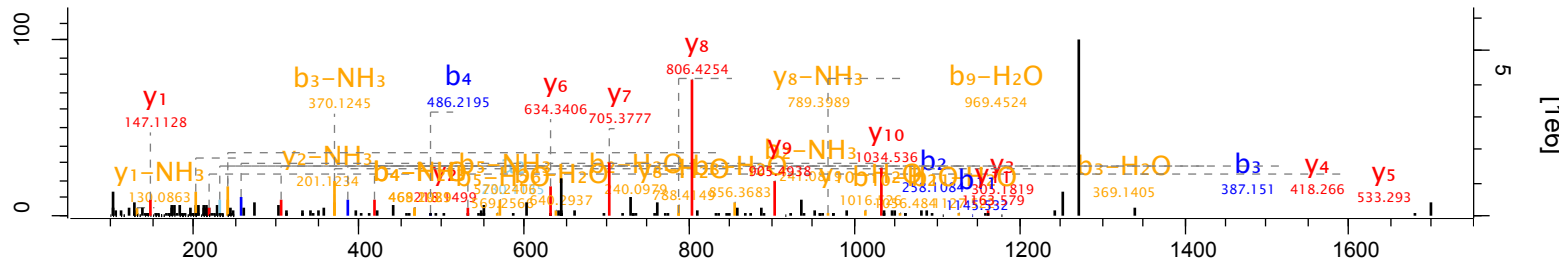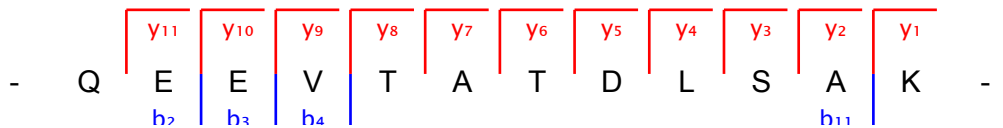



| Raw file                                   | Scan  | Method    | Score  | m/z     | Gene names |
|--------------------------------------------|-------|-----------|--------|---------|------------|
| 20121216_EXQ1_AtDe_50CM_LFQ_myotubes_OG3_1 | 17812 | FTMS; HCD | 115.85 | 1066.94 | Emp1       |

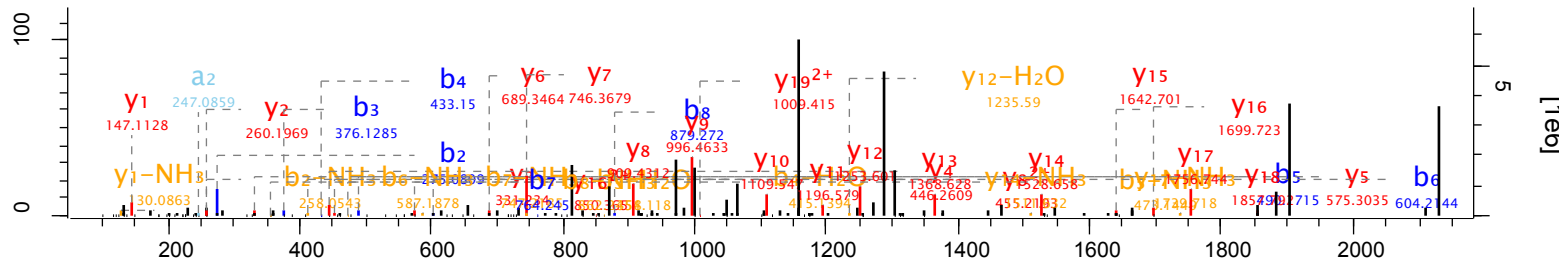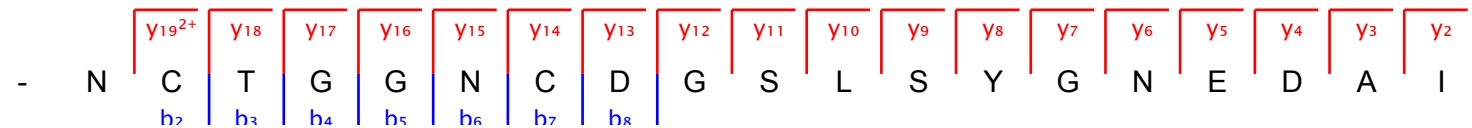

| Raw file                                   | Scan  | Method    | Score | m/z    | Gene names |
|--------------------------------------------|-------|-----------|-------|--------|------------|
| 20121216_EXQ1_AtDe_50CM_LFQ_myotubes_OG3_1 | 18104 | FTMS; HCD | 115.8 | 631.96 | Crabp2     |

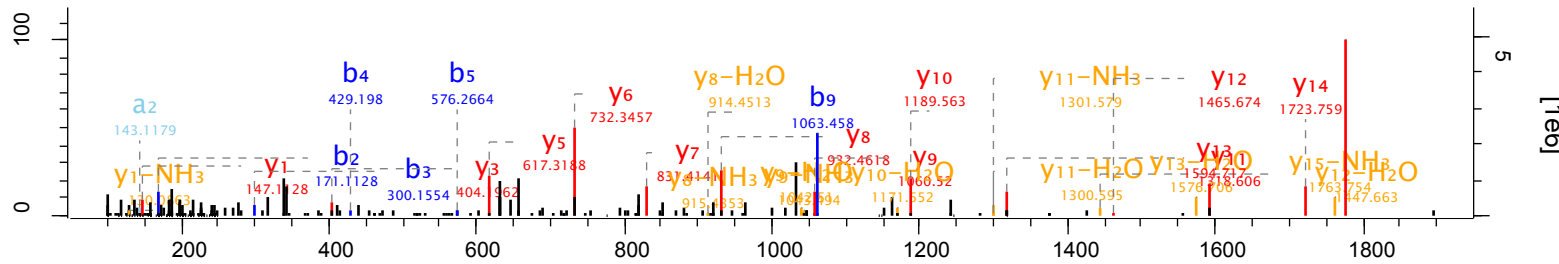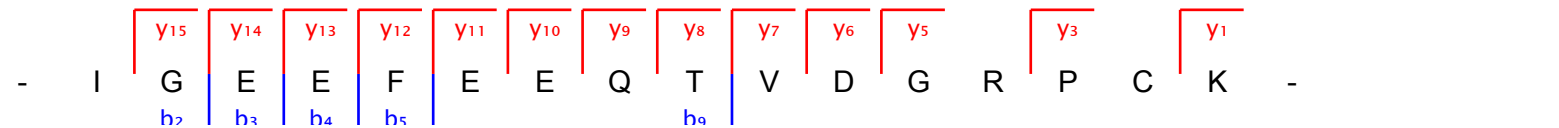

| Raw file                                   | Scan  | Method    | Score  | m/z   | Gene names |
|--------------------------------------------|-------|-----------|--------|-------|------------|
| 20121216_EXQ1_AtDe_50CM_LFQ_myotubes_OG3_1 | 34540 | FTMS; HCD | 161.67 | 559.3 | Lamtor4    |

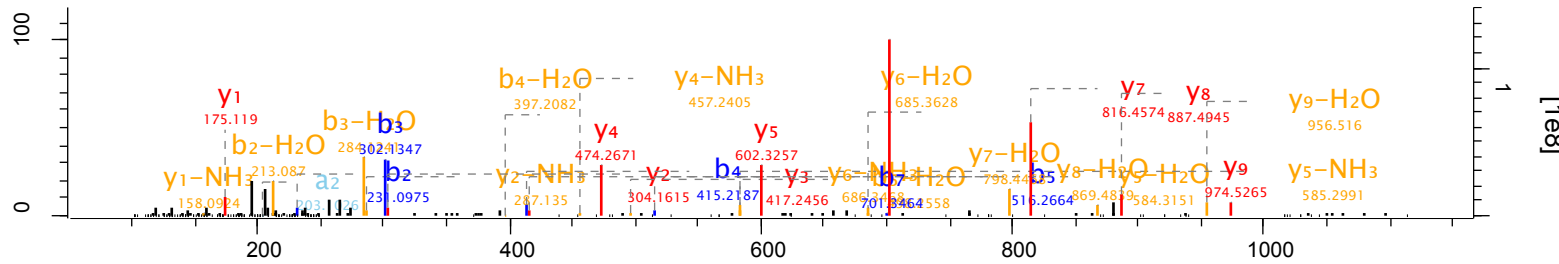

| Raw file                                   | Scan  | Method    | Score | m/z    | Gene names |
|--------------------------------------------|-------|-----------|-------|--------|------------|
| 20121216_EXQ1_AtDe_50CM_LFQ_myotubes_OG3_1 | 35328 | FTMS; HCD | 90.69 | 665.31 | Cdc42ep5   |

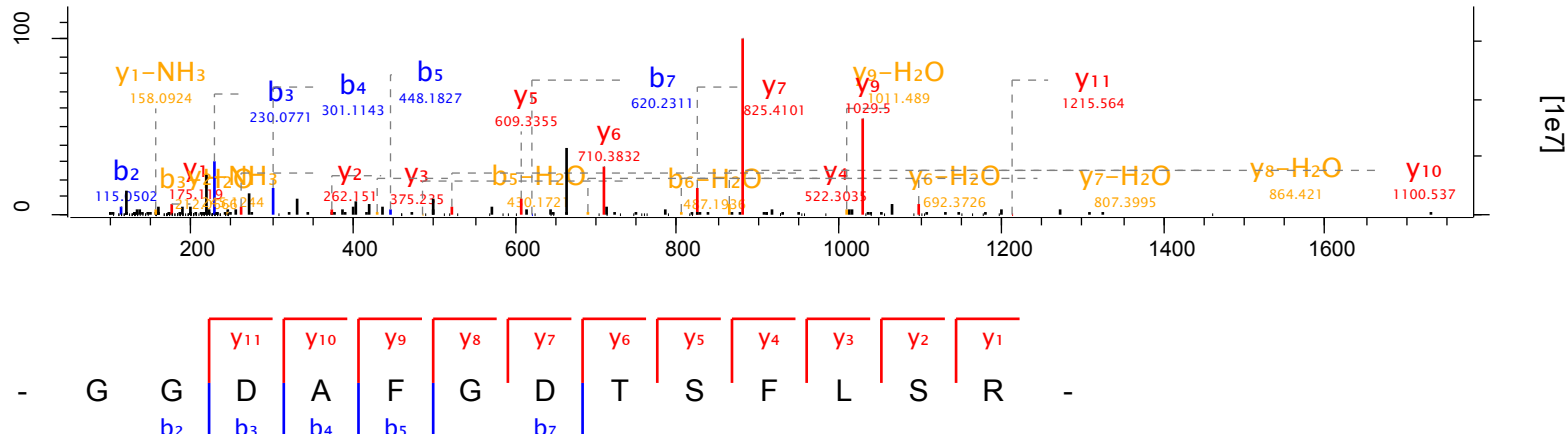

| Raw file                                   | Scan  | Method    | Score  | m/z    | Gene names |
|--------------------------------------------|-------|-----------|--------|--------|------------|
| 20121216_EXQ1_AtDe_50CM_LFQ_myotubes_OG3_1 | 42174 | FTMS; HCD | 128.29 | 966.46 | Tmem128    |

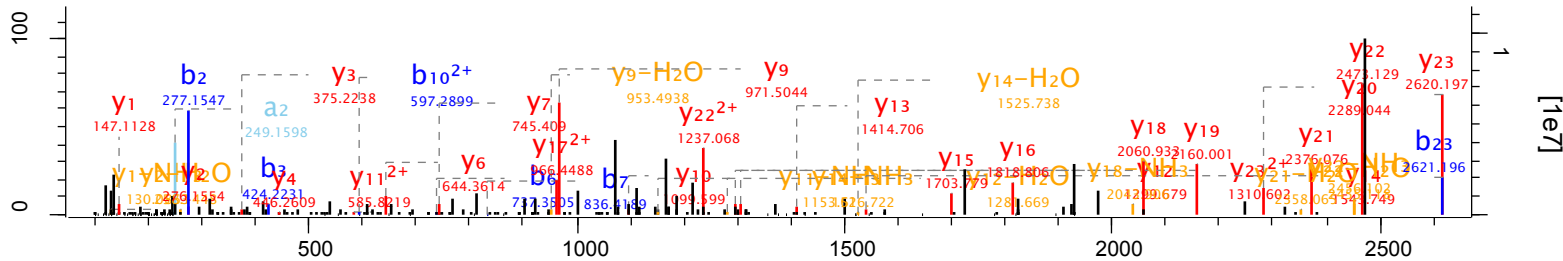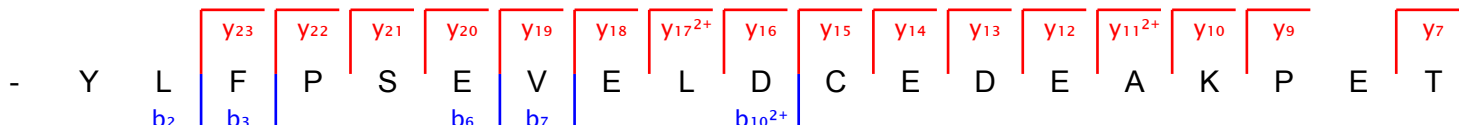

| Raw file                                   | Scan  | Method    | Score | m/z    | Gene names |
|--------------------------------------------|-------|-----------|-------|--------|------------|
| 20121216_EXQ1_AtDe_50CM_LFQ_myotubes_OG3_1 | 46357 | FTMS; HCD | 57.14 | 888.42 | Slc31a2    |

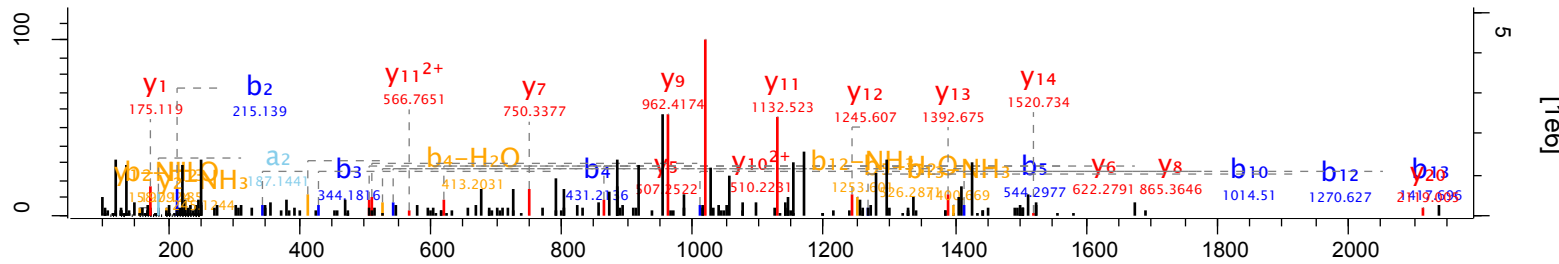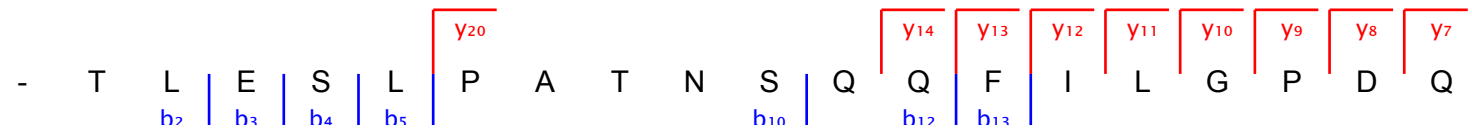

| Raw file                                   | Scan  | Method    | Score  | m/z     | Gene names |
|--------------------------------------------|-------|-----------|--------|---------|------------|
| 20121216_EXQ1_AtDe_50CM_LFQ_myotubes_OG3_1 | 46361 | FTMS; HCD | 118.05 | 1332.16 | Slc31a2    |

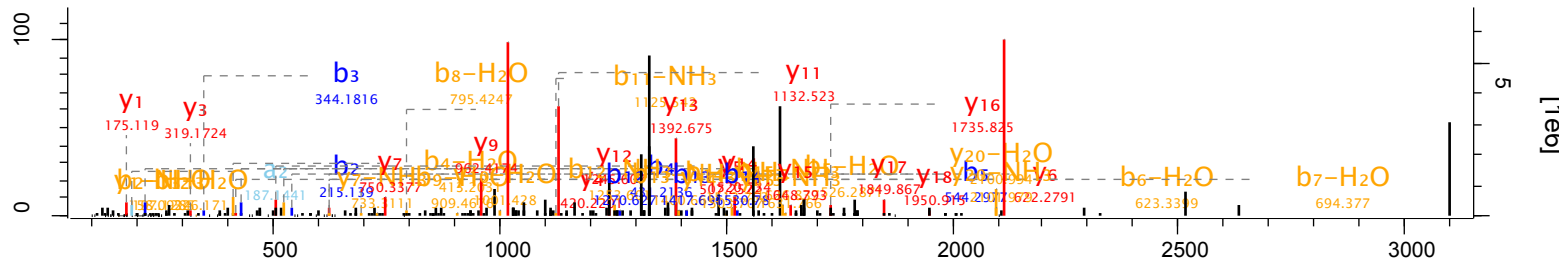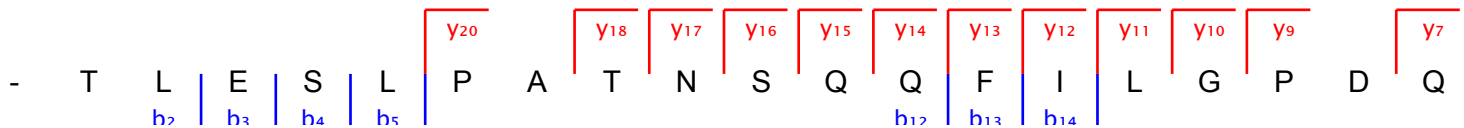

| Raw file                                   | Scan  | Method    | Score | m/z     | Gene names |
|--------------------------------------------|-------|-----------|-------|---------|------------|
| 20121216_EXQ1_AtDe_50CM_LFQ_myotubes_OG3_1 | 46481 | FTMS; HCD | 82.48 | 1332.66 | Slc31a2    |

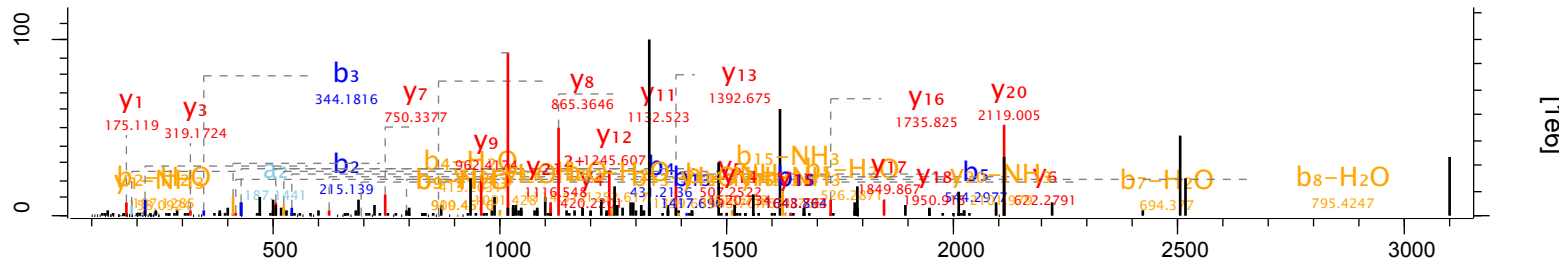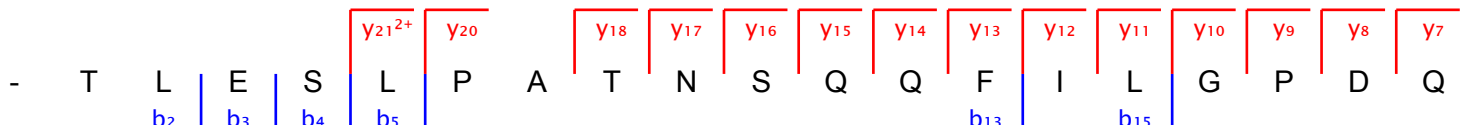



| Raw file                                   | Scan  | Method    | Score | m/z    | Gene names |
|--------------------------------------------|-------|-----------|-------|--------|------------|
| 20121216_EXQ1_AtDe_50CM_LFQ_myotubes_OG3_1 | 47545 | FTMS; HCD | 85.54 | 751.41 | Nfyb       |

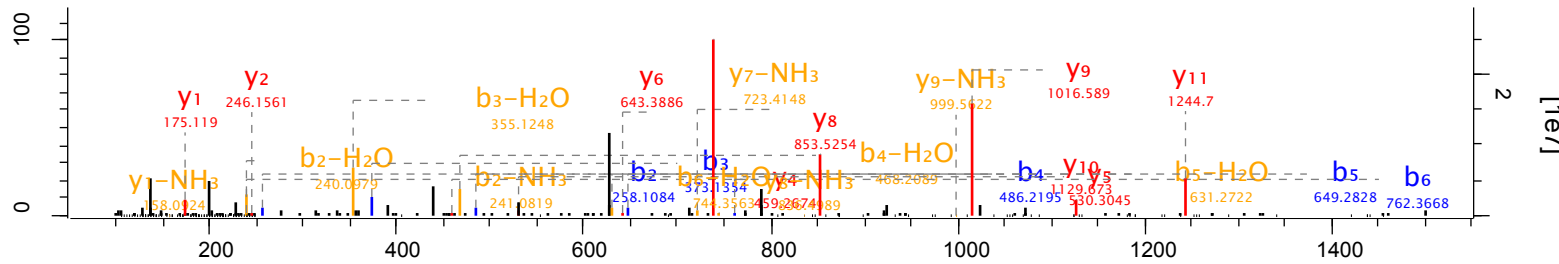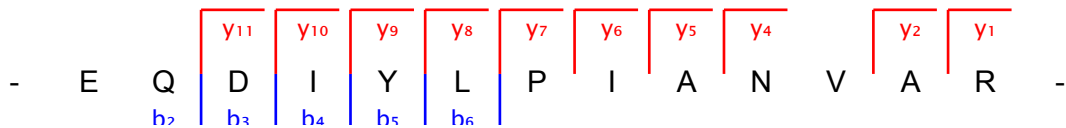

| Raw file                                   | Scan  | Method    | Score | m/z    | Gene names |
|--------------------------------------------|-------|-----------|-------|--------|------------|
| 20121216_EXQ1_AtDe_50CM_LFQ_myotubes_OG3_1 | 47758 | FTMS; HCD | 63.3  | 975.46 | Gpbp111    |

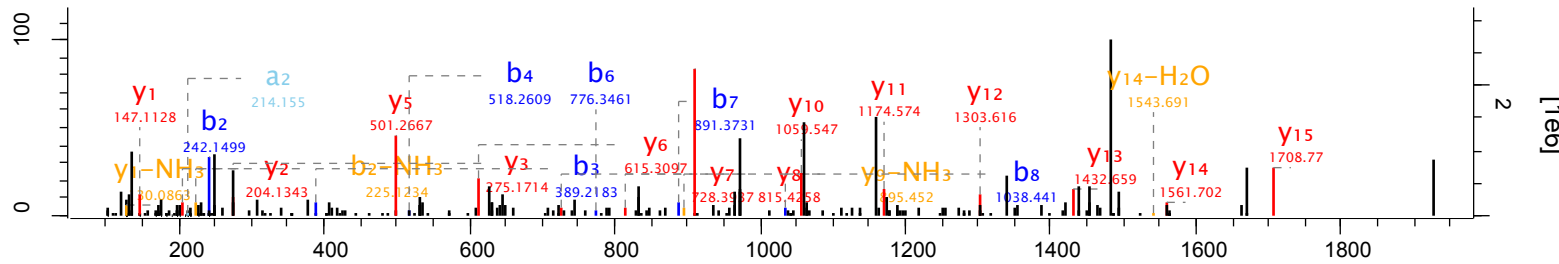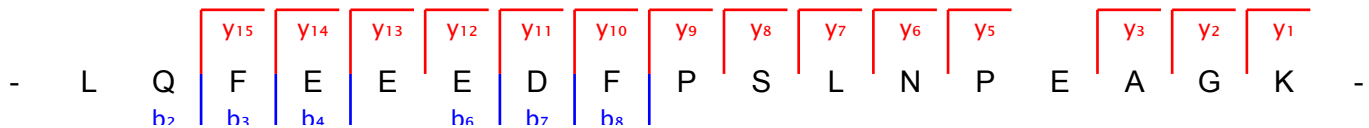

| Raw file                                   | Scan  | Method    | Score | m/z    | Gene names |
|--------------------------------------------|-------|-----------|-------|--------|------------|
| 20121216_EXQ1_AtDe_50CM_LFQ_myotubes_OG3_1 | 49052 | FTMS; HCD | 99.99 | 646.31 | Naf1       |

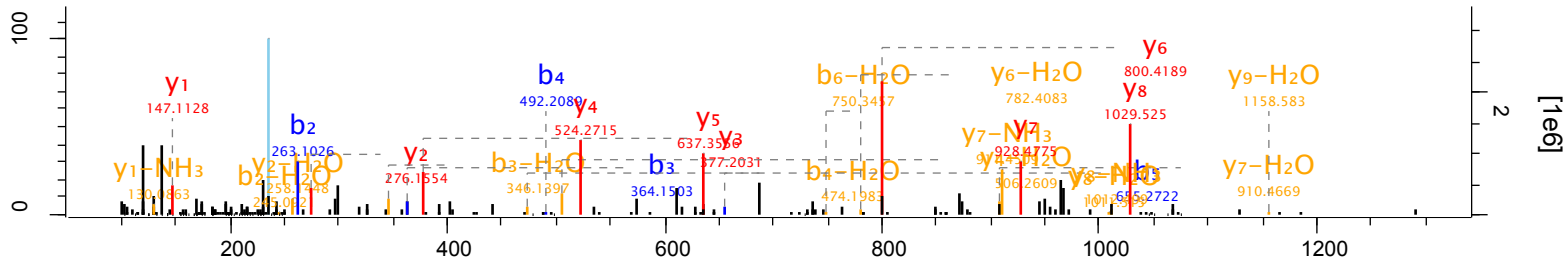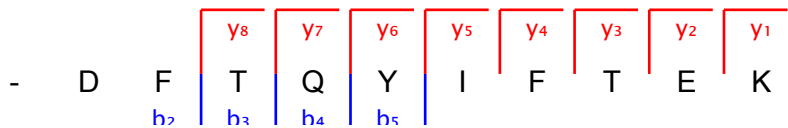

| Raw file                                   | Scan  | Method    | Score | m/z     | Gene names |
|--------------------------------------------|-------|-----------|-------|---------|------------|
| 20121216_EXQ1_AtDe_50CM_LFQ_myotubes_OG3_1 | 49211 | FTMS; HCD | 71.43 | 1324.16 | Mapk1ip1l  |

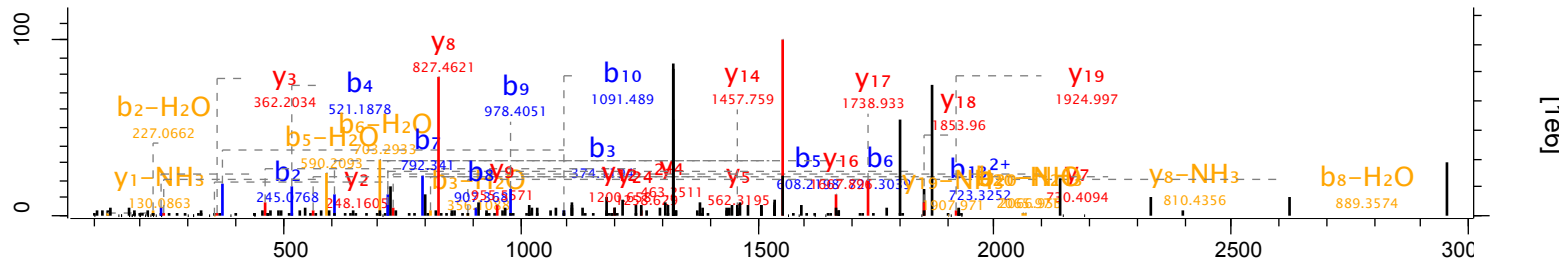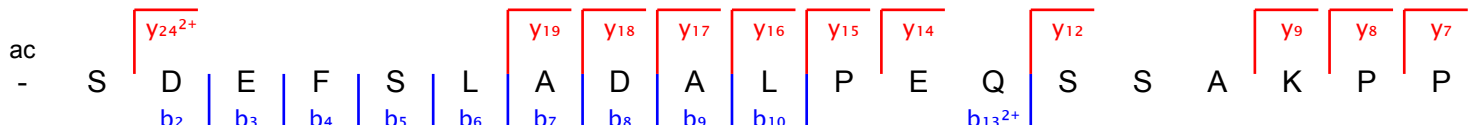

| Raw file                                   | Scan  | Method    | Score  | m/z    | Gene names |
|--------------------------------------------|-------|-----------|--------|--------|------------|
| 20121216_EXQ1_AtDe_50CM_LFQ_myotubes_OG3_1 | 49241 | FTMS; HCD | 102.21 | 882.77 | Mapk1ip1l  |

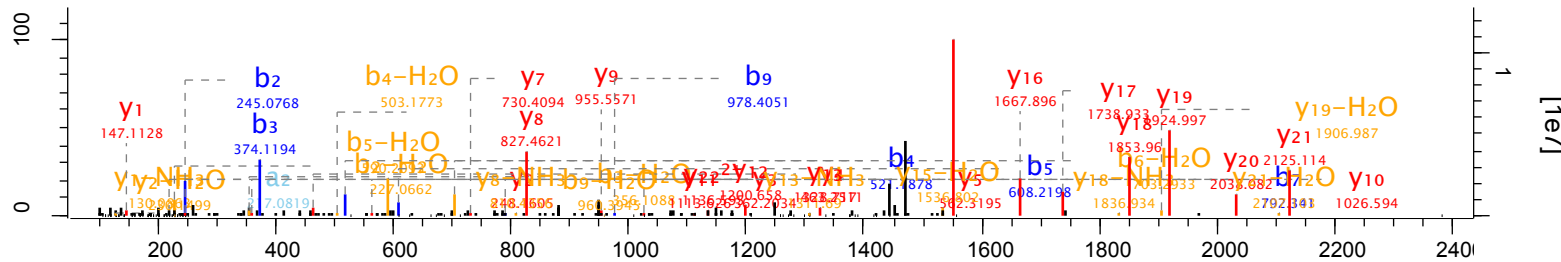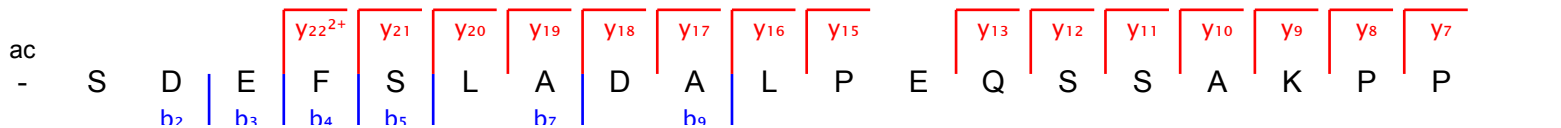

| Raw file                                   | Scan  | Method    | Score | m/z    | Gene names |
|--------------------------------------------|-------|-----------|-------|--------|------------|
| 20121216_EXQ1_AtDe_50CM_LFQ_myotubes_OG3_1 | 51823 | FTMS; HCD | 117.2 | 724.84 | Nr2c2ap    |

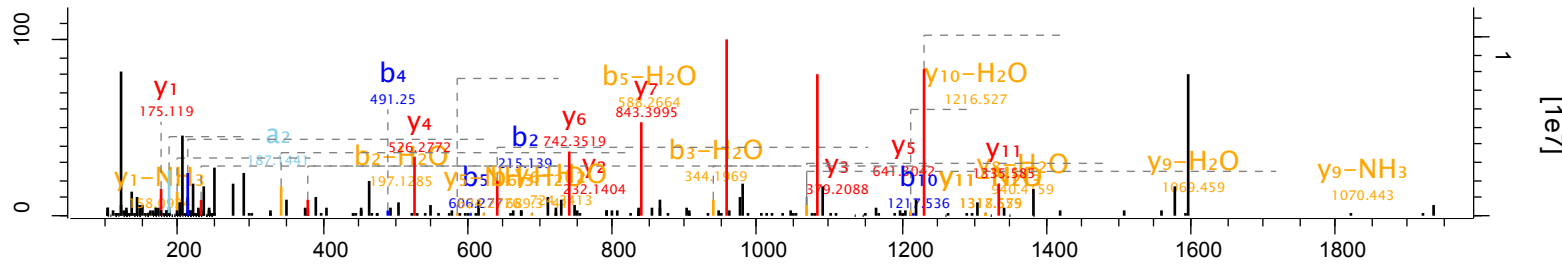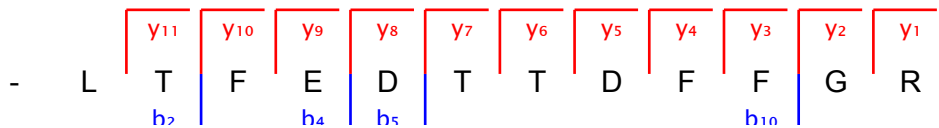

| Raw file                                   | Scan  | Method    | Score  | m/z    | Gene names   |
|--------------------------------------------|-------|-----------|--------|--------|--------------|
| 20121216_EXQ1_AtDe_50CM_LFQ_myotubes_OG3_1 | 52644 | FTMS; HCD | 138.26 | 520.27 | Lmbr11;Lmbr1 |

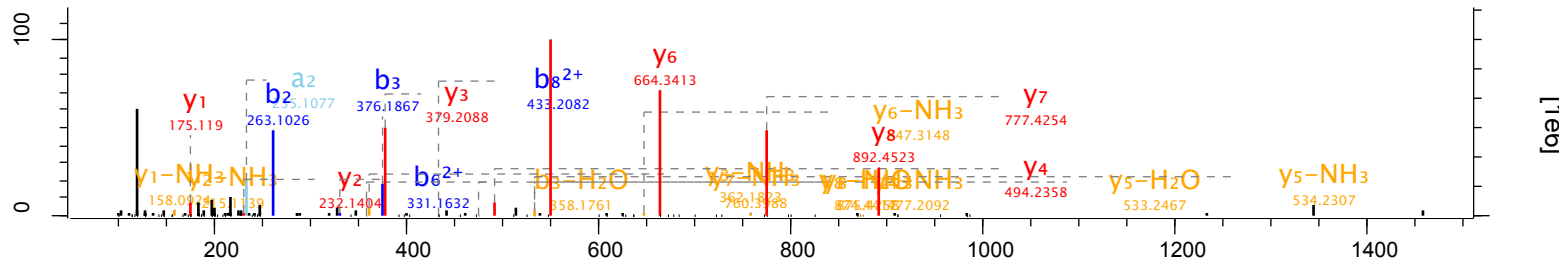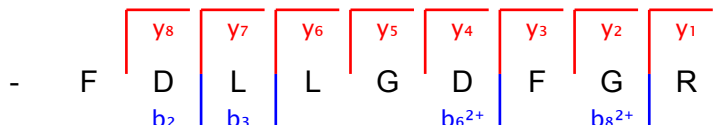

| Raw file                                   | Scan | Method    | Score | m/z    | Gene names |
|--------------------------------------------|------|-----------|-------|--------|------------|
| 20121216_EXQ1_AtDe_50CM_LFQ_myotubes_OG3_1 | 9766 | FTMS; HCD | 80.17 | 684.29 | Fxyd1      |

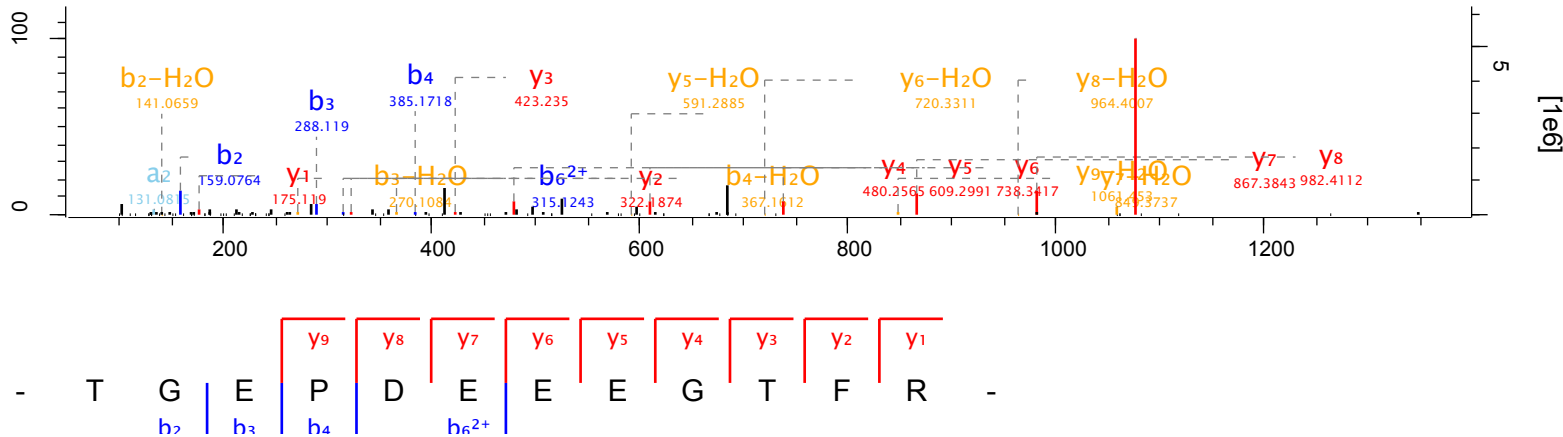



| Raw file                                    | Scan  | Method    | Score  | m/z    | Gene names |
|---------------------------------------------|-------|-----------|--------|--------|------------|
| 20121216_EXQ1_AtDe_50CM_LFQ_myotubes_OG3_10 | 16767 | FTMS; HCD | 120.86 | 666.84 | Insig1     |

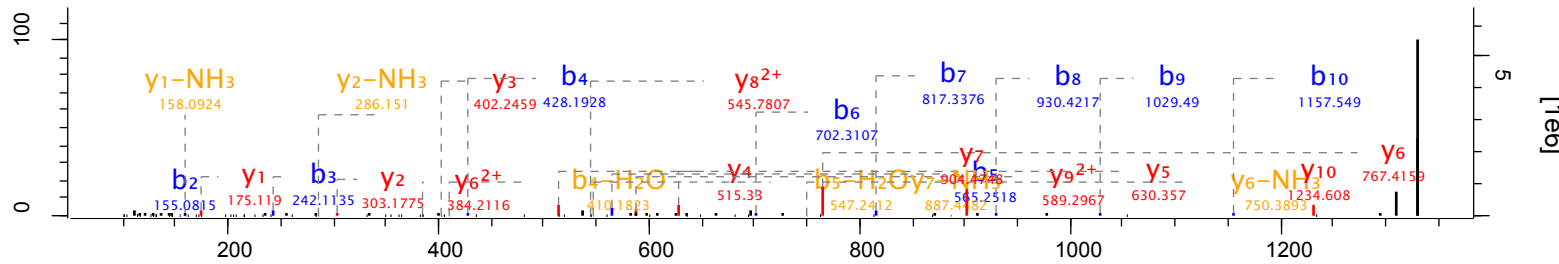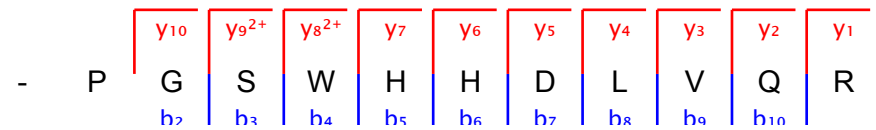

| Raw file                                    | Scan  | Method    | Score  | m/z    | Gene names |
|---------------------------------------------|-------|-----------|--------|--------|------------|
| 20121216_EXQ1_AtDe_50CM_LFQ_myotubes_OG3_10 | 16774 | FTMS; HCD | 103.21 | 444.56 | Insig1     |

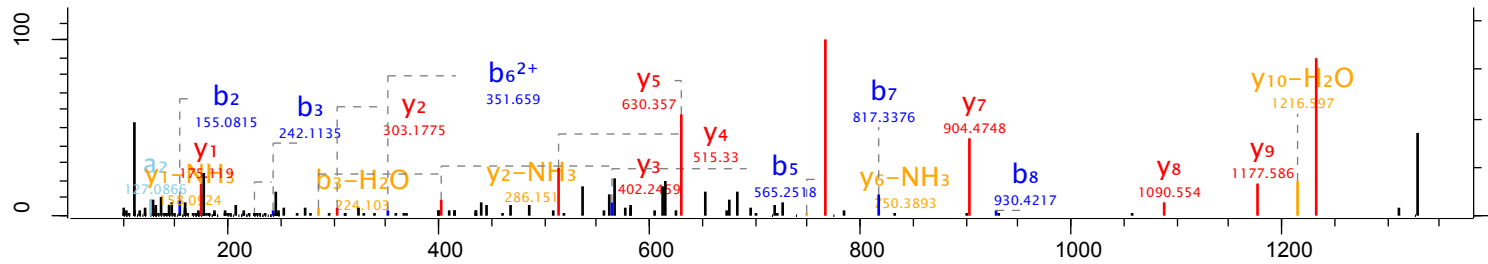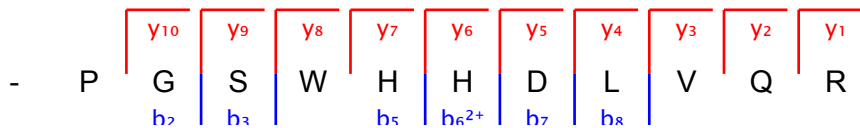

[1e6]

| Raw file                                    | Scan  | Method    | Score | m/z   | Gene names |
|---------------------------------------------|-------|-----------|-------|-------|------------|
| 20121216_EXQ1_AtDe_50CM_LFQ_myotubes_OG3_10 | 20891 | FTMS; HCD | 77.06 | 725.9 | Zfp11      |

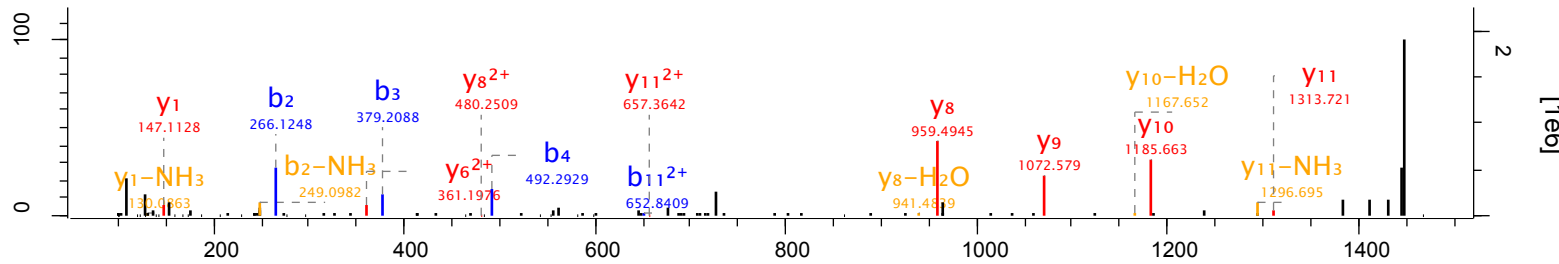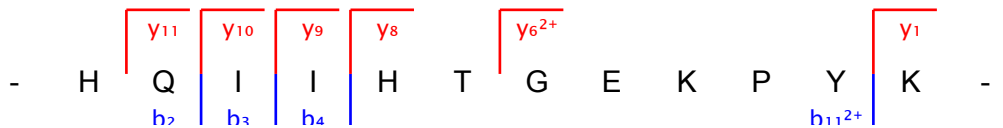

| Raw file                                    | Scan  | Method    | Score | m/z    | Gene names |
|---------------------------------------------|-------|-----------|-------|--------|------------|
| 20121216_EXQ1_AtDe_50CM_LFQ_myotubes_OG3_10 | 25516 | FTMS; HCD | 52.02 | 616.32 | Ifi44      |

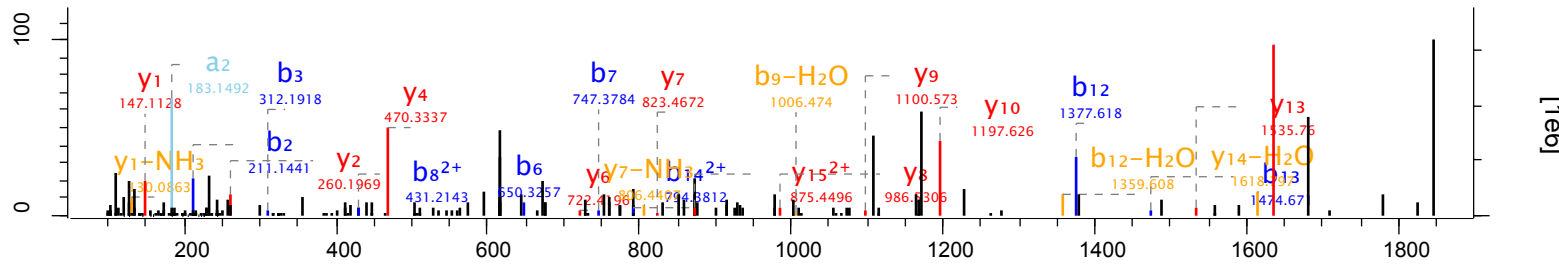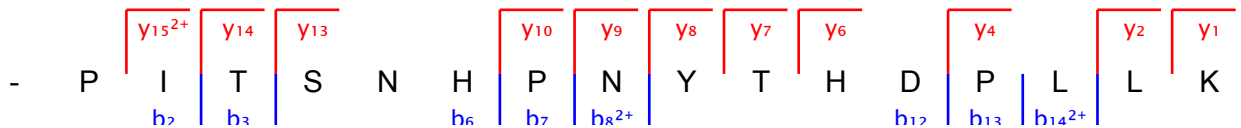

| Raw file                                    | Scan  | Method    | Score | m/z    | Gene names |
|---------------------------------------------|-------|-----------|-------|--------|------------|
| 20121216_EXQ1_AtDe_50CM_LFQ_myotubes_OG3_10 | 30827 | FTMS; HCD | 74.96 | 587.83 | Syngn2     |

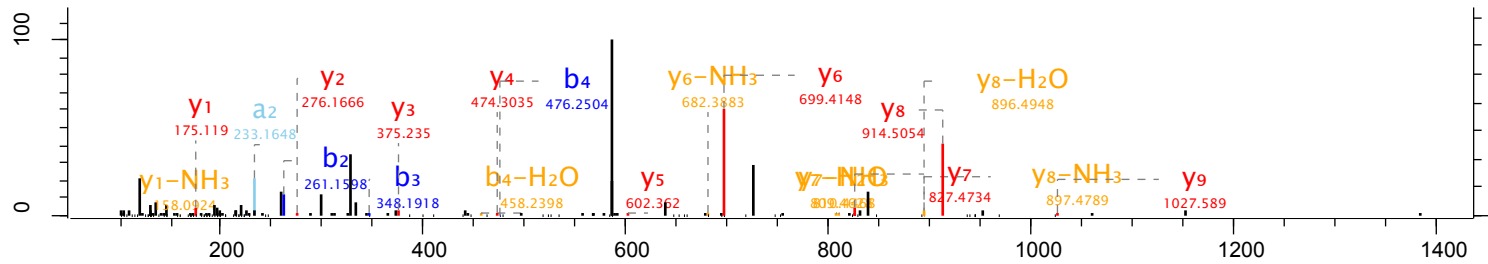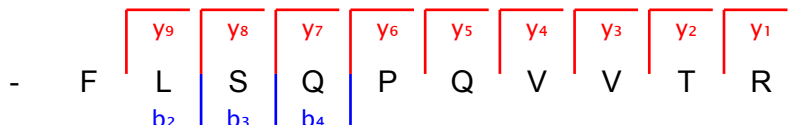

| Raw file                                    | Scan  | Method    | Score  | m/z     | Gene name |
|---------------------------------------------|-------|-----------|--------|---------|-----------|
| 20121216_EXQ1_AtDe_50CM_LFQ_myotubes_OG3_10 | 48246 | FTMS; HCD | 102.43 | 1067.02 | Unc50     |

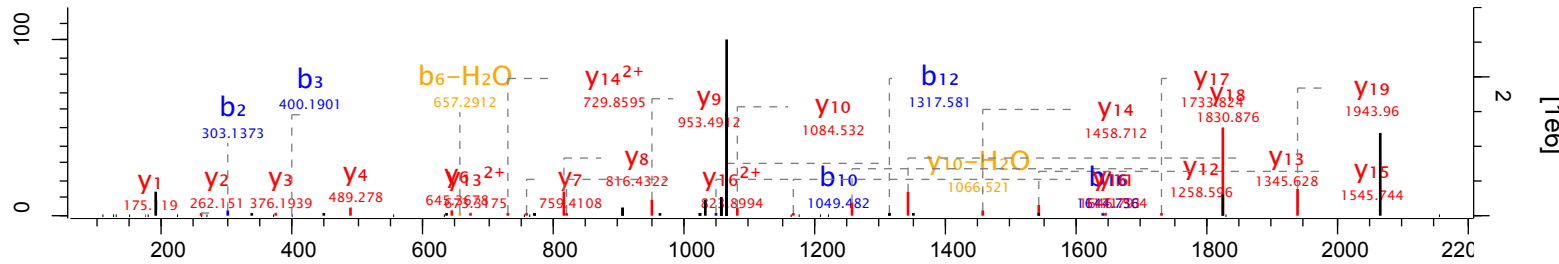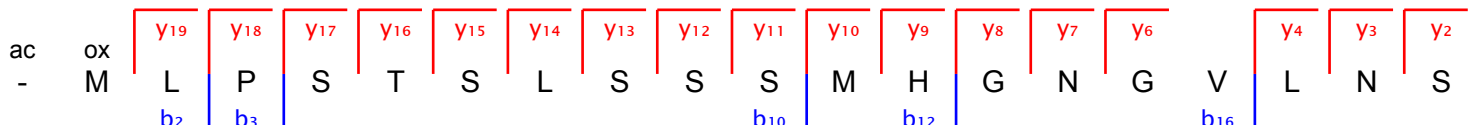

| Raw file                                    | Scan  | Method    | Score | m/z   | Gene names |
|---------------------------------------------|-------|-----------|-------|-------|------------|
| 20121216_EXQ1_AtDe_50CM_LFQ_myotubes_OG3_10 | 49161 | FTMS; HCD | 67.9  | 881.5 | Krtcap2    |

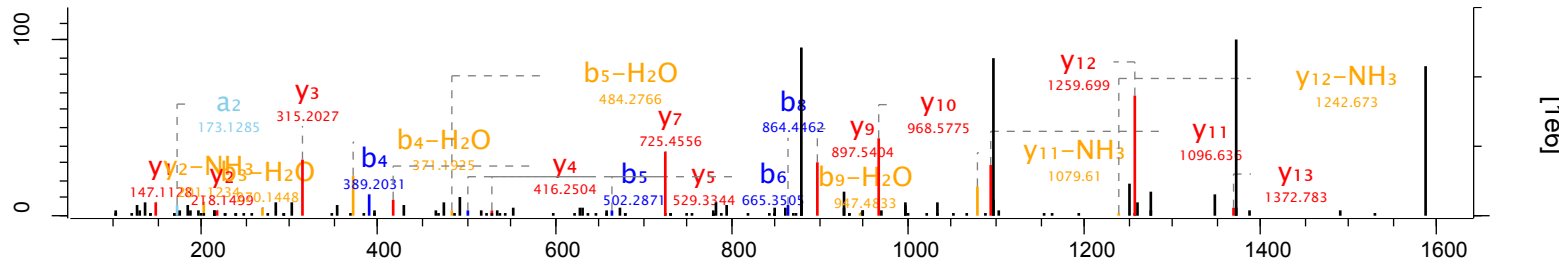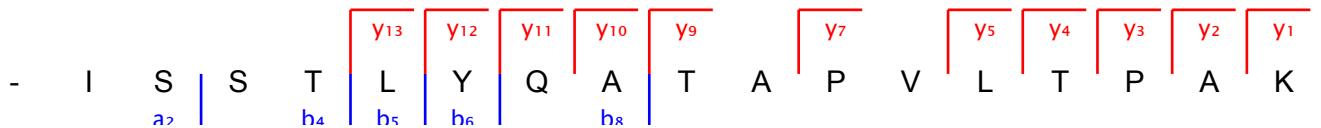

| Raw file                                    | Scan  | Method    | Score | m/z    | Gene names |
|---------------------------------------------|-------|-----------|-------|--------|------------|
| 20121216_EXQ1_AtDe_50CM_LFQ_myotubes_OG3_10 | 60280 | FTMS; HCD | 86.78 | 813.46 | Plac8      |

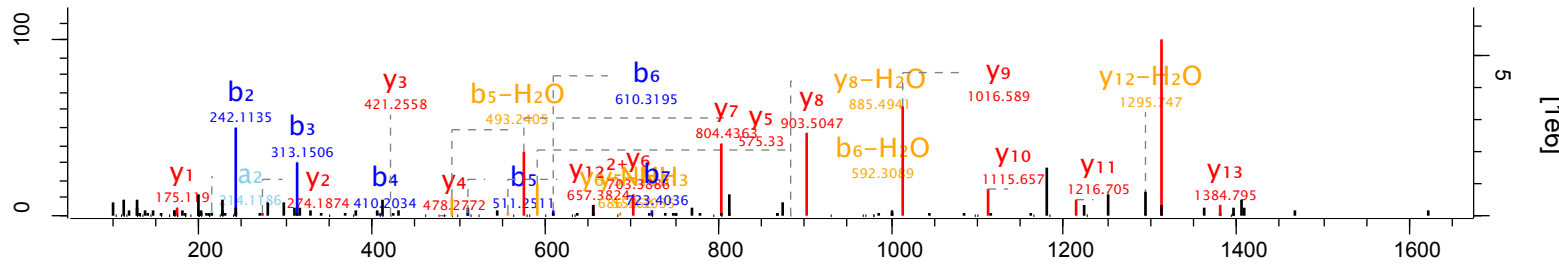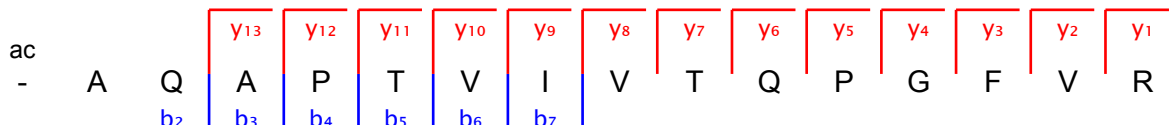



| Raw file                                    | Scan  | Method    | Score  | m/z    | Gene names |
|---------------------------------------------|-------|-----------|--------|--------|------------|
| 20121216_EXQ1_AtDe_50CM_LFQ_myotubes_OG3_10 | 66431 | FTMS; HCD | 119.54 | 740.41 | Ifi2711    |

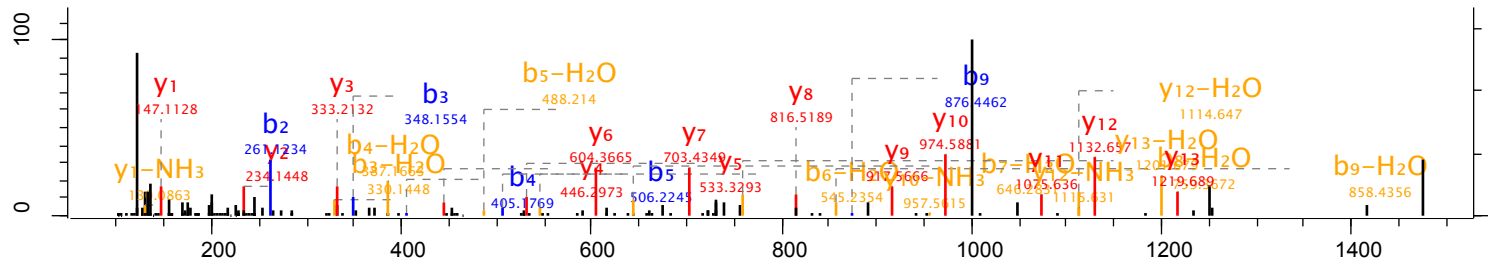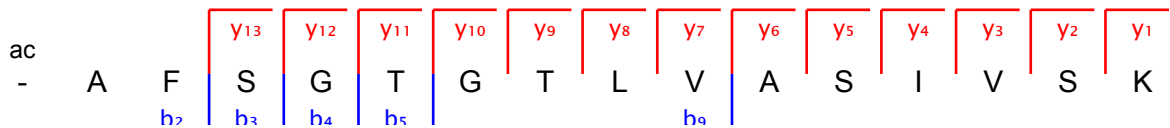

[1e6]

| Raw file                                    | Scan  | Method    | Score  | m/z    | Gene names |
|---------------------------------------------|-------|-----------|--------|--------|------------|
| 20121216_EXQ1_AtDe_50CM_LFQ_myotubes_OG3_10 | 67544 | FTMS; HCD | 133.48 | 852.99 | Gemin7     |

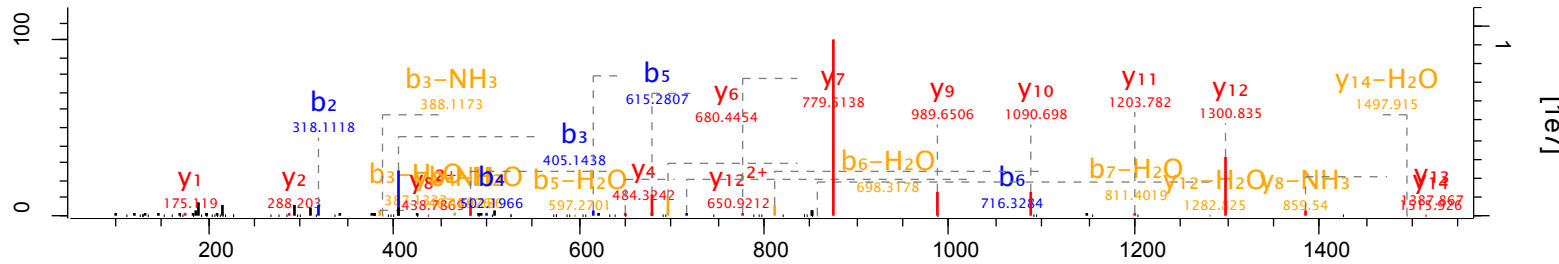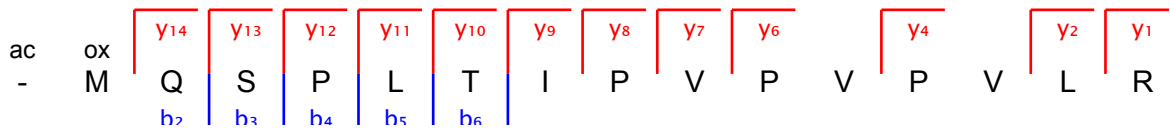

| Raw file                                    | Scan  | Method    | Score  | m/z    | Gene names |
|---------------------------------------------|-------|-----------|--------|--------|------------|
| 20121216_EXQ1_AtDe_50CM_LFQ_myotubes_OG3_11 | 10745 | FTMS; HCD | 158.11 | 652.79 | Gpr39      |

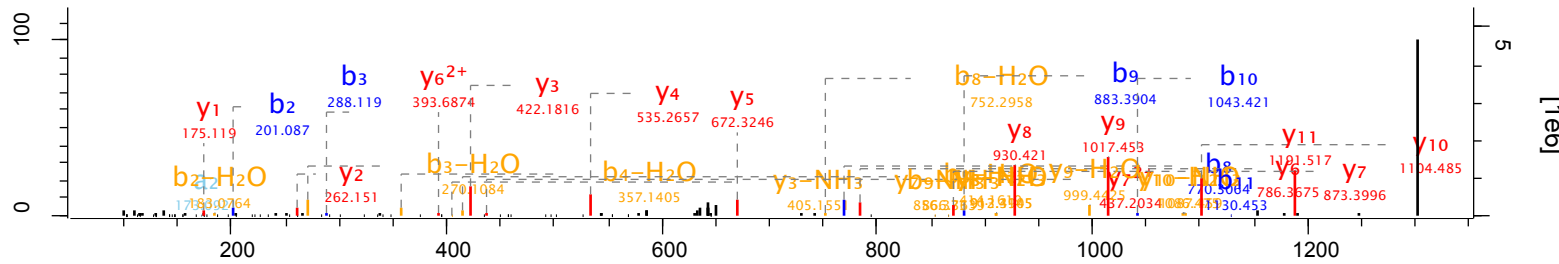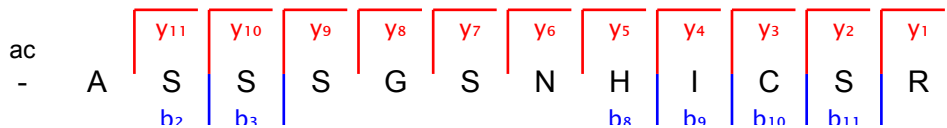

| Raw file                                    | Scan  | Method    | Score  | m/z   | Gene names |
|---------------------------------------------|-------|-----------|--------|-------|------------|
| 20121216_EXQ1_AtDe_50CM_LFQ_myotubes_OG3_11 | 15693 | FTMS; HCD | 143.96 | 579.3 | Col4a3bp   |

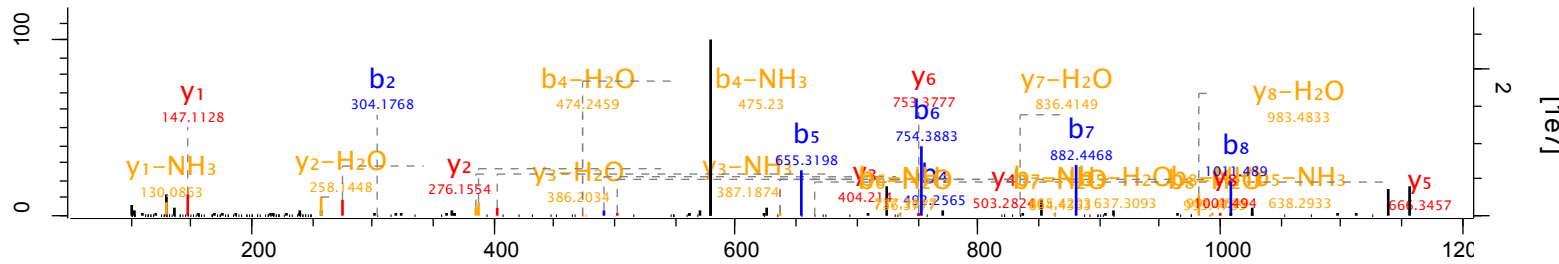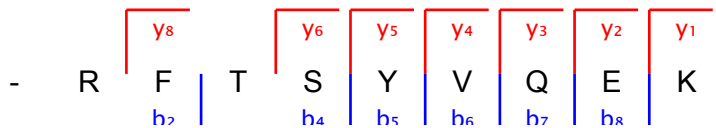

| Raw file                                    | Scan  | Method    | Score  | m/z    | Gene names |
|---------------------------------------------|-------|-----------|--------|--------|------------|
| 20121216_EXQ1_AtDe_50CM_LFQ_myotubes_OG3_11 | 19804 | FTMS; HCD | 103.19 | 535.26 | Irf2       |

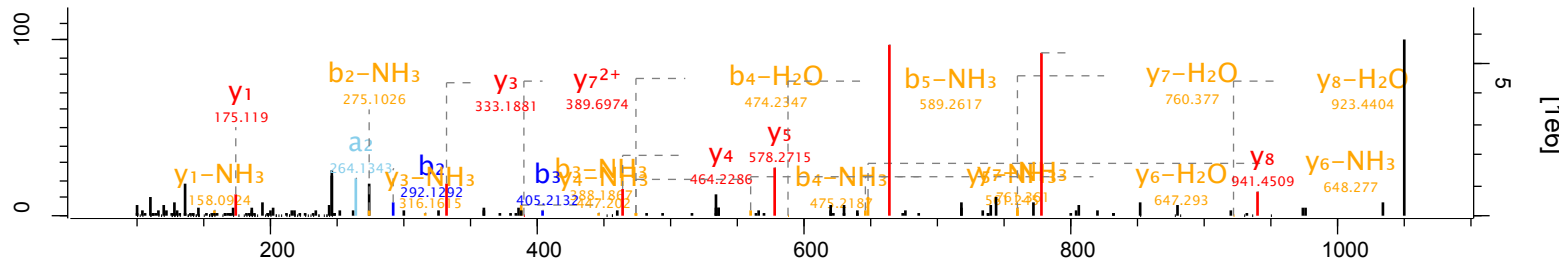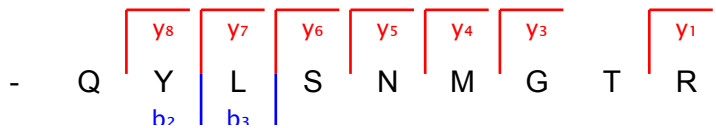

| Raw file                                    | Scan  | Method    | Score  | m/z    | Gene names |
|---------------------------------------------|-------|-----------|--------|--------|------------|
| 20121216_EXQ1_AtDe_50CM_LFQ_myotubes_OG3_11 | 29899 | FTMS; HCD | 163.99 | 763.87 | Lysmd1     |

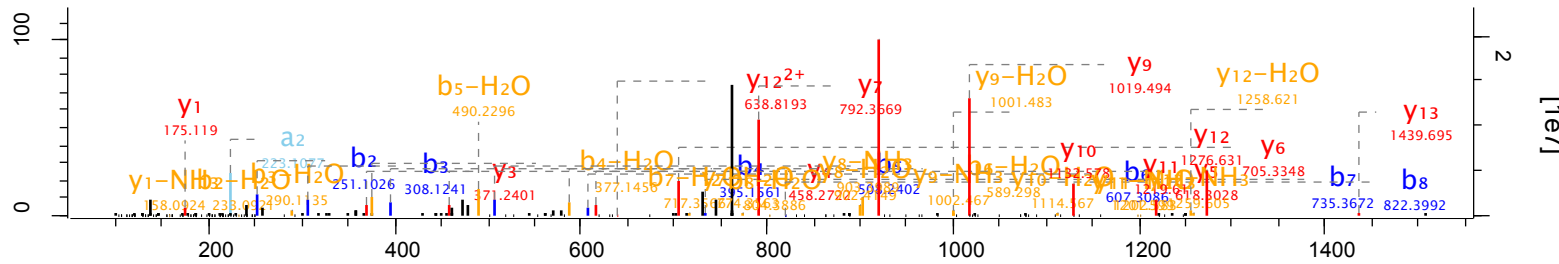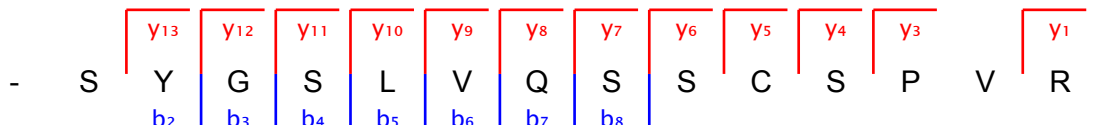

| Raw file                                    | Scan  | Method    | Score  | m/z    | Gene names |
|---------------------------------------------|-------|-----------|--------|--------|------------|
| 20121216_EXQ1_AtDe_50CM_LFQ_myotubes_OG3_11 | 29913 | FTMS; HCD | 119.27 | 587.84 | Syngn2     |

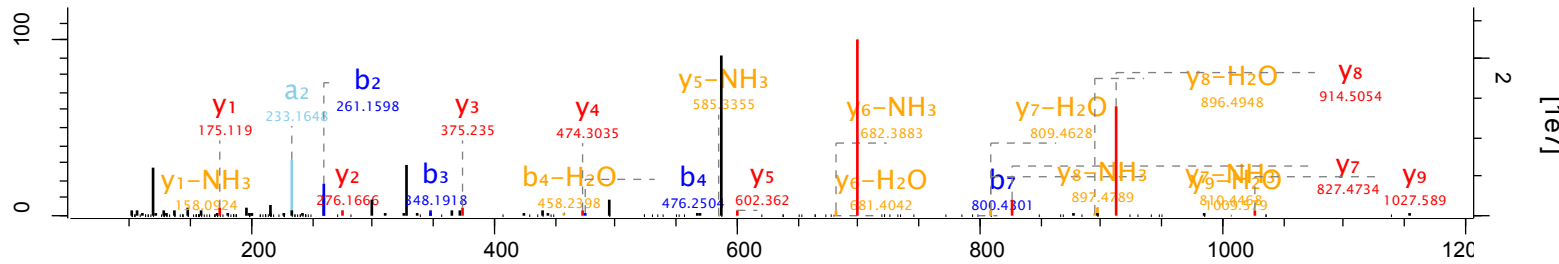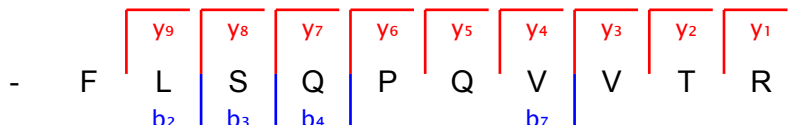

| Raw file                                    | Scan  | Method    | Score | m/z   | Gene names |
|---------------------------------------------|-------|-----------|-------|-------|------------|
| 20121216_EXQ1_AtDe_50CM_LFQ_myotubes_OG3_11 | 31709 | FTMS; HCD | 90.14 | 584.8 | Gylt1b     |

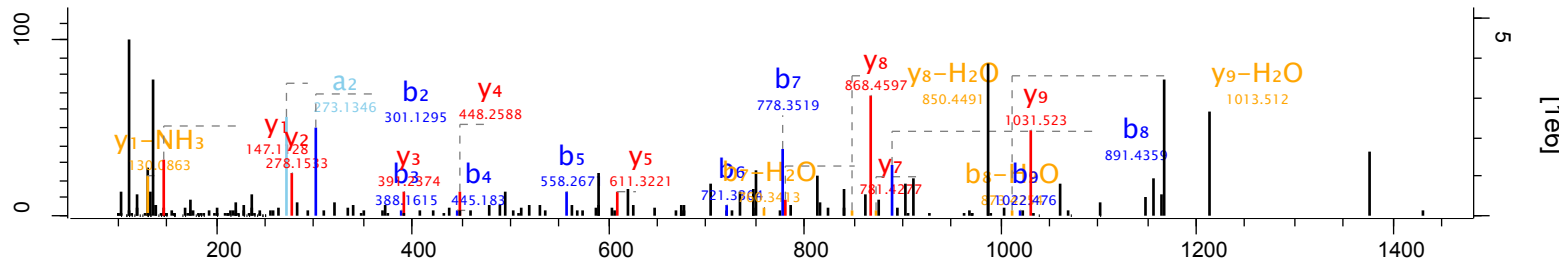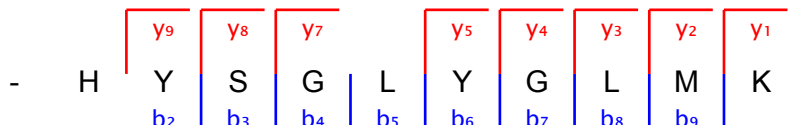



| Raw file                                    | Scan  | Method    | Score  | m/z    | Gene names |
|---------------------------------------------|-------|-----------|--------|--------|------------|
| 20121216_EXQ1_AtDe_50CM_LFQ_myotubes_OG3_11 | 32603 | FTMS; HCD | 122.18 | 734.89 | Nsg1       |

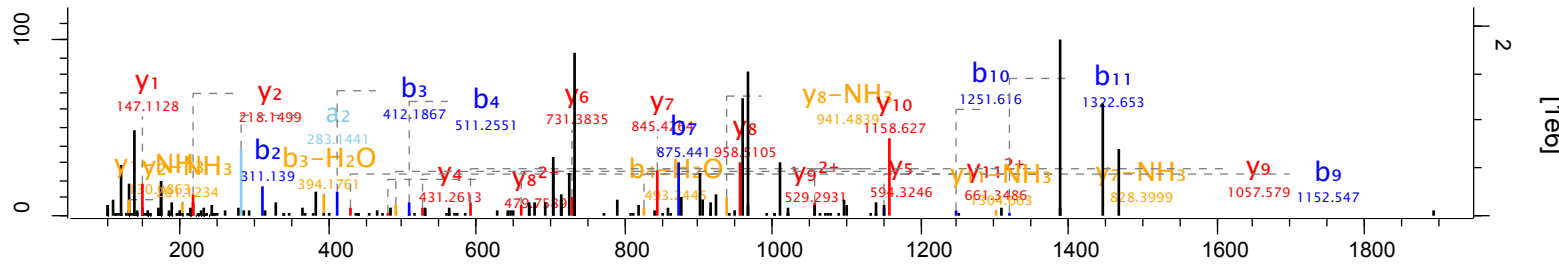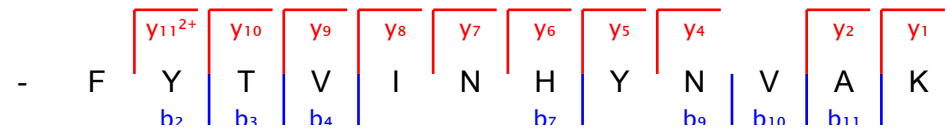

| Raw file                                    | Scan  | Method    | Score | m/z    | Gene names |
|---------------------------------------------|-------|-----------|-------|--------|------------|
| 20121216_EXQ1_AtDe_50CM_LFQ_myotubes_OG3_11 | 42110 | FTMS; HCD | 80.74 | 574.66 | Tanc2      |

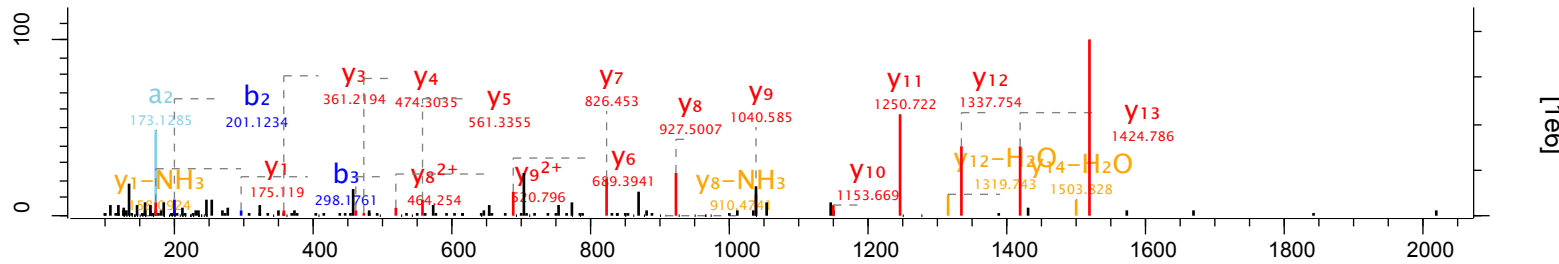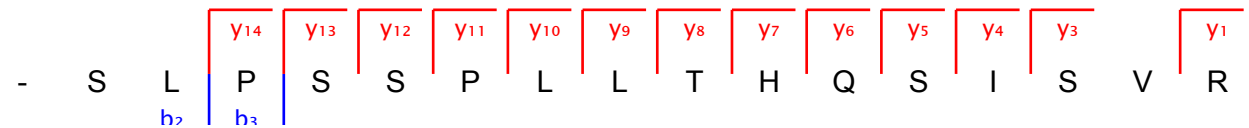



Raw file

20121216\_EXQ1\_AtDe\_50CM\_LFQ\_myotubes\_OG3\_11

Scan

43024

Method

FTMS; HCD

Score

51.19

m/z

482.79

Gene names

Plch1

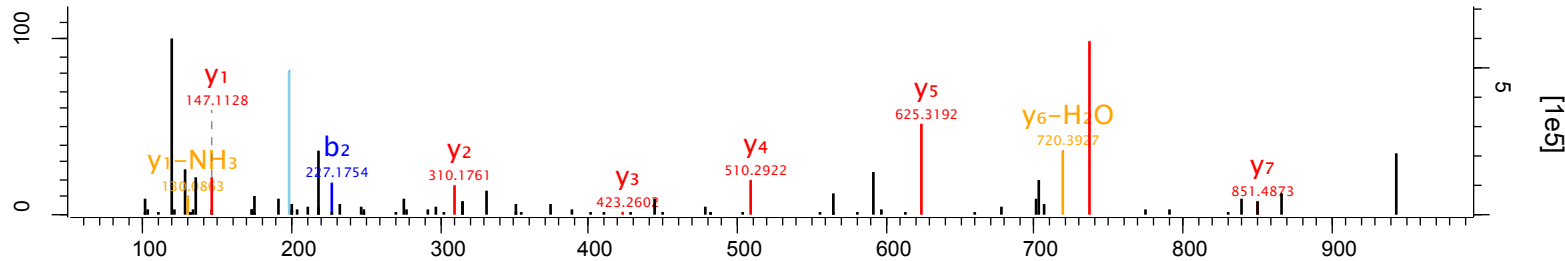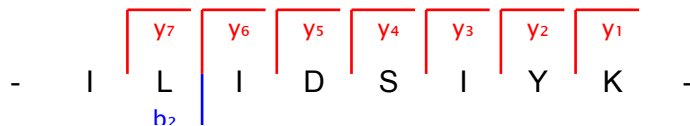

| Raw file                                    | Scan  | Method    | Score | m/z | Gene names |
|---------------------------------------------|-------|-----------|-------|-----|------------|
| 20121216_EXQ1_AtDe_50CM_LFQ_myotubes_OG3_11 | 49039 | FTMS; HCD | 78.44 | 881 | Krtcap2    |

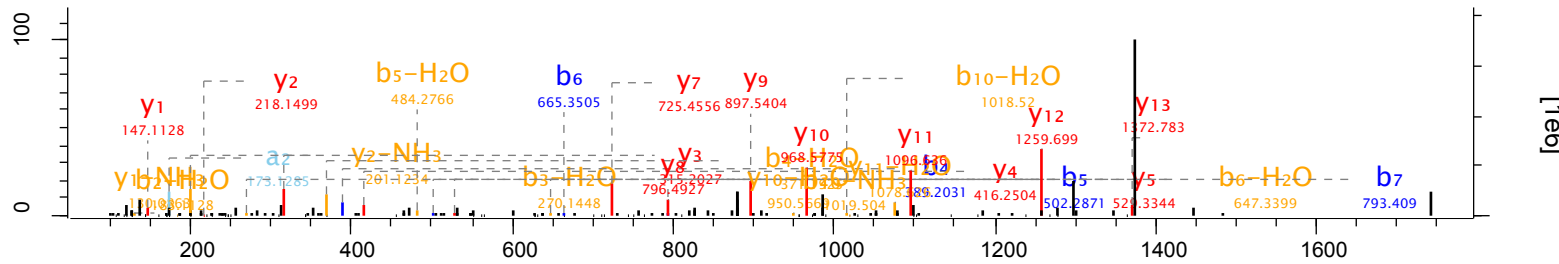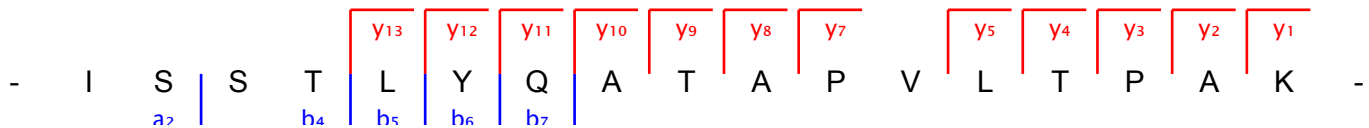

| Raw file                                    | Scan  | Method    | Score  | m/z    | Gene names |
|---------------------------------------------|-------|-----------|--------|--------|------------|
| 20121216_EXQ1_AtDe_50CM_LFQ_myotubes_OG3_11 | 49222 | FTMS; HCD | 109.36 | 587.67 | Krtcap2    |

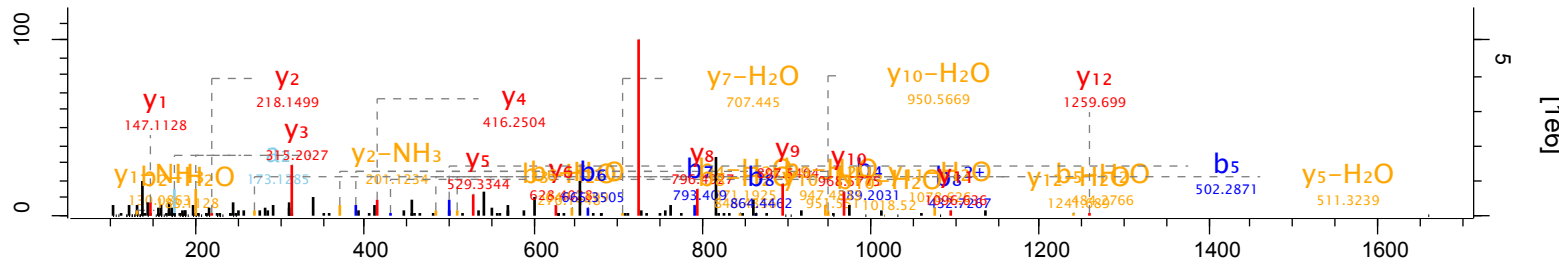

| Raw file                                    | Scan  | Method    | Score  | m/z    | Gene names |
|---------------------------------------------|-------|-----------|--------|--------|------------|
| 20121216_EXQ1_AtDe_50CM_LFQ_myotubes_OG3_11 | 49716 | FTMS; HCD | 128.81 | 538.82 | Nusap1     |

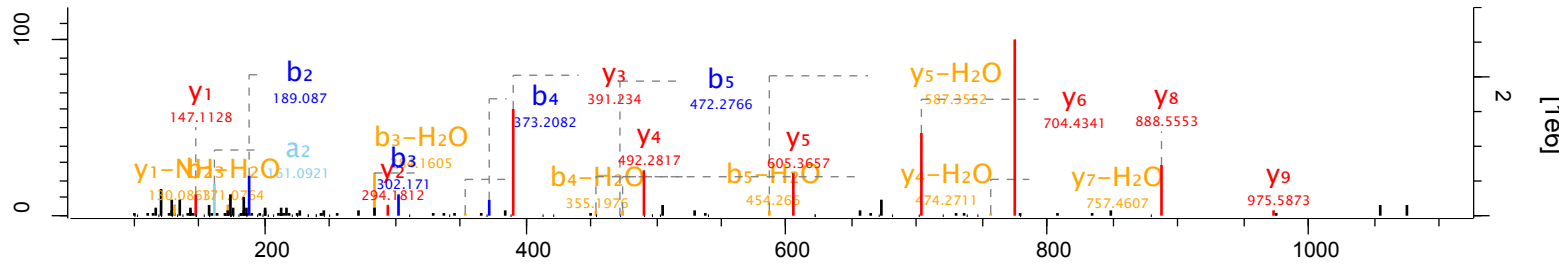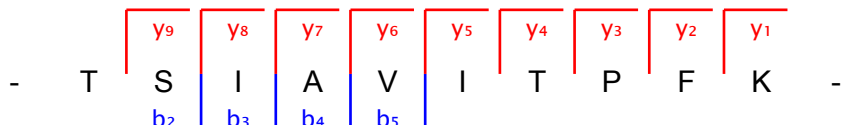

| Raw file                                    | Scan  | Method    | Score | m/z     | Gene name |
|---------------------------------------------|-------|-----------|-------|---------|-----------|
| 20121216_EXQ1_AtDe_50CM_LFQ_myotubes_OG3_11 | 55848 | FTMS; HCD | 96.55 | 1059.01 | Unc50     |

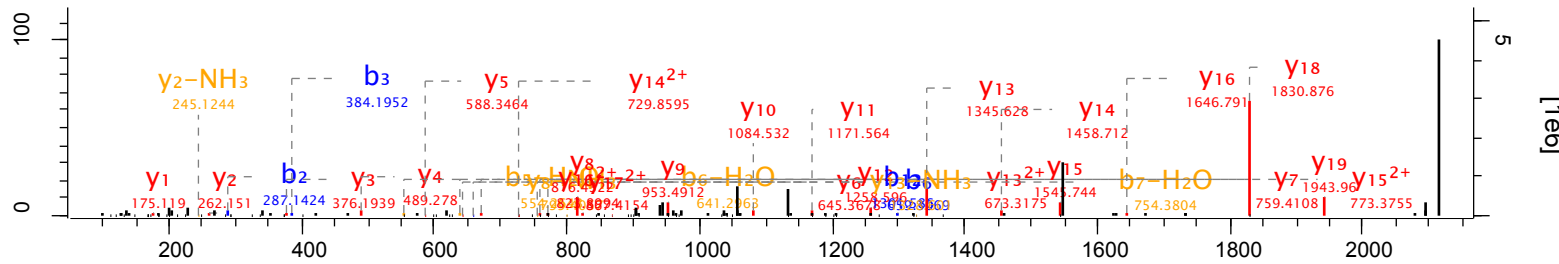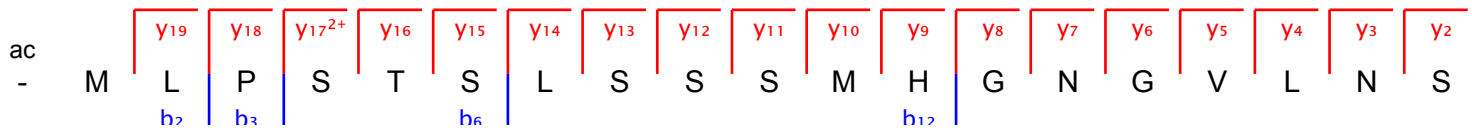



| Raw file                                    | Scan  | Method    | Score | m/z    | Gene names |
|---------------------------------------------|-------|-----------|-------|--------|------------|
| 20121216_EXQ1_AtDe_50CM_LFQ_myotubes_OG3_11 | 55926 | FTMS; HCD | 76.49 | 706.34 | Unc50      |

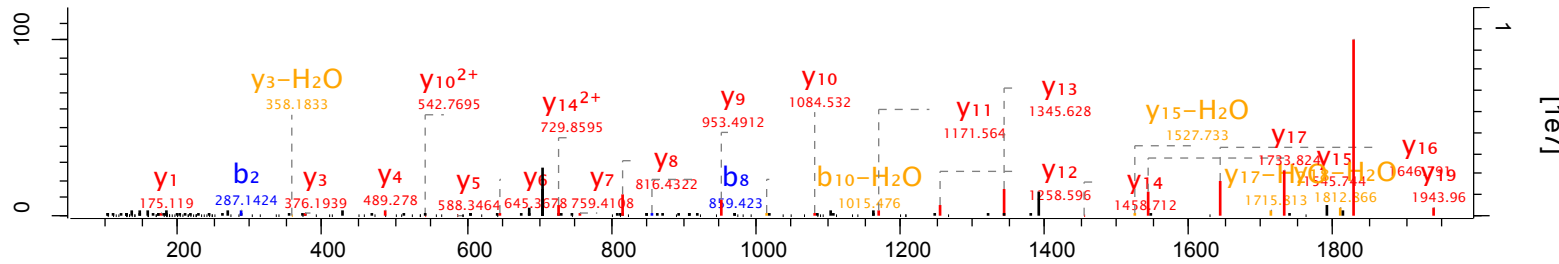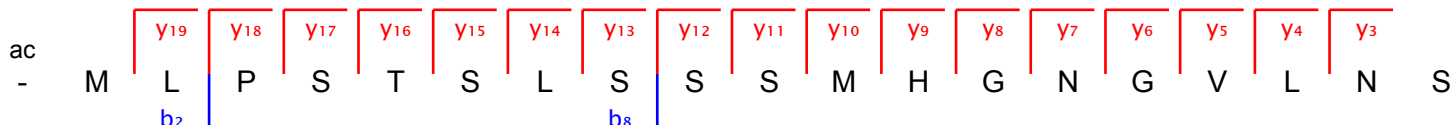

| Raw file                                    | Scan  | Method    | Score | m/z    | Gene names |
|---------------------------------------------|-------|-----------|-------|--------|------------|
| 20121216_EXQ1_AtDe_50CM_LFQ_myotubes_OG3_11 | 56888 | FTMS; HCD | 56.09 | 673.34 | Tp53i13    |

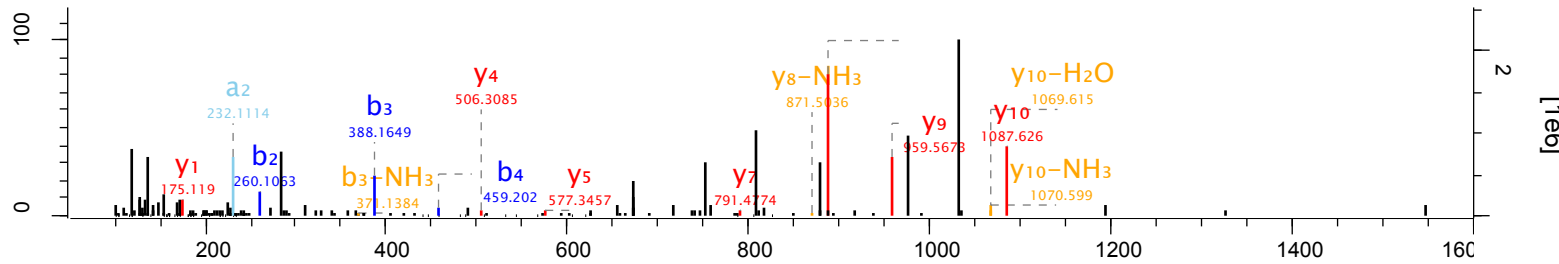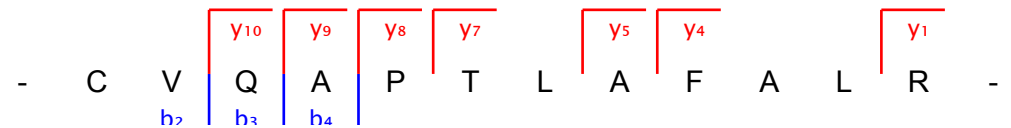

| Raw file                                    | Scan  | Method    | Score | m/z    | Gene names |
|---------------------------------------------|-------|-----------|-------|--------|------------|
| 20121216_EXQ1_AtDe_50CM_LFQ_myotubes_OG3_11 | 58620 | FTMS; HCD | 82.66 | 684.32 | Ldlrad3    |

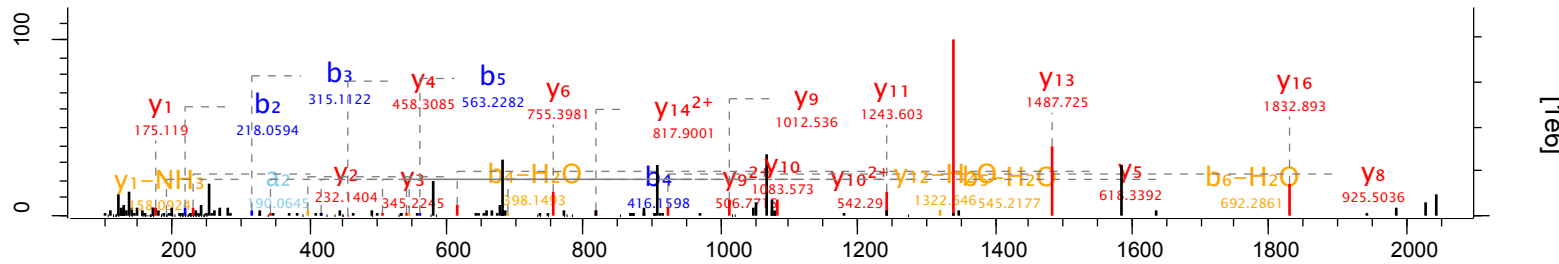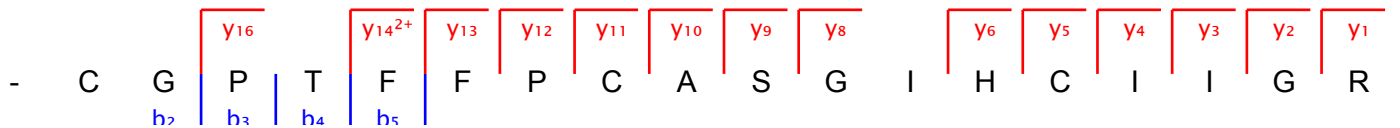

| Raw file                                    | Scan  | Method    | Score  | m/z    | Gene names |
|---------------------------------------------|-------|-----------|--------|--------|------------|
| 20121216_EXQ1_AtDe_50CM_LFQ_myotubes_OG3_11 | 59992 | FTMS; HCD | 103.69 | 577.32 | Cmtm6      |

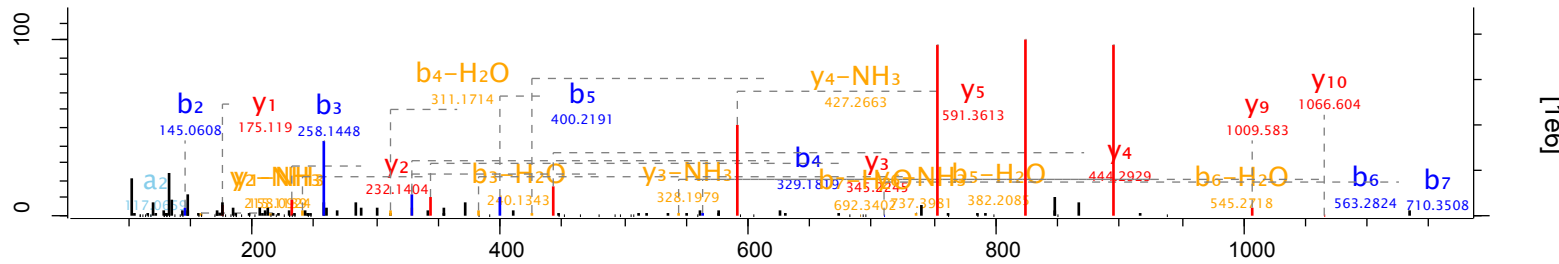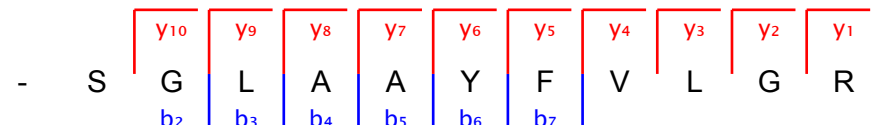

Raw file

20121216\_EXQ1\_AtDe\_50CM\_LFQ\_myotubes\_OG3\_11

Scan

60100

Method

FTMS; HCD

Score

90.7

m/z

737.89

Gene names

Slc25a37

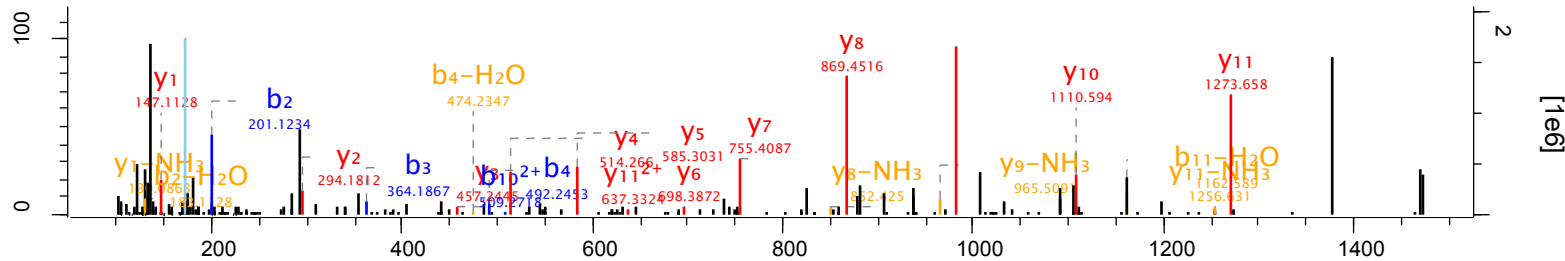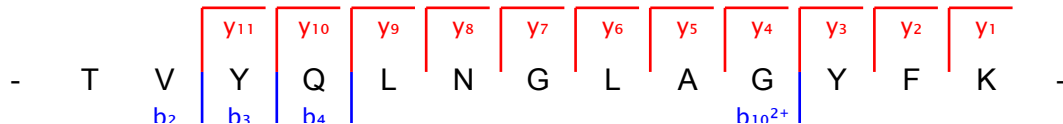

| Raw file                                    | Scan  | Method    | Score  | m/z    | Gene names |
|---------------------------------------------|-------|-----------|--------|--------|------------|
| 20121216_EXQ1_AtDe_50CM_LFQ_myotubes_OG3_11 | 61088 | FTMS; HCD | 131.72 | 840.95 | Mea1       |

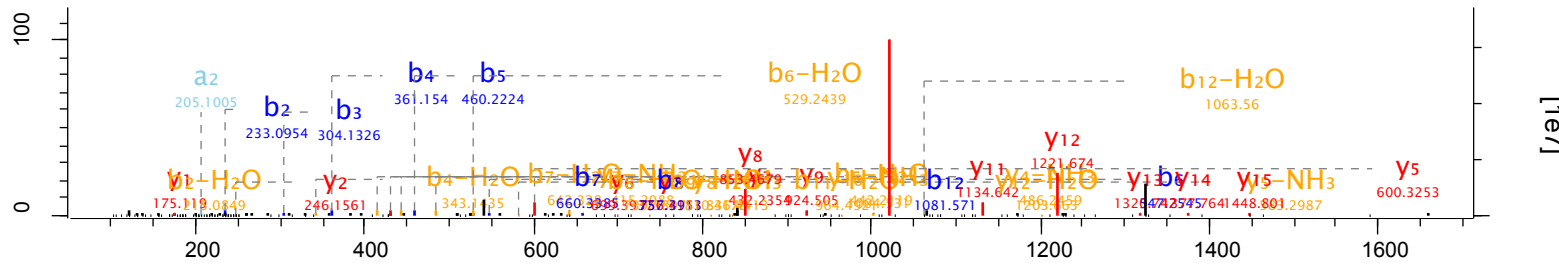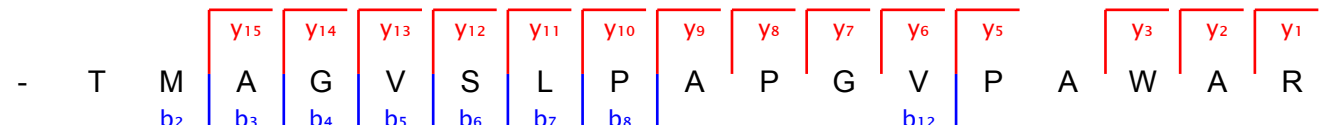

| Raw file                                    | Scan  | Method    | Score  | m/z    | Gene names |
|---------------------------------------------|-------|-----------|--------|--------|------------|
| 20121216_EXQ1_AtDe_50CM_LFQ_myotubes_OG3_11 | 61121 | FTMS; HCD | 103.88 | 813.46 | Plac8      |

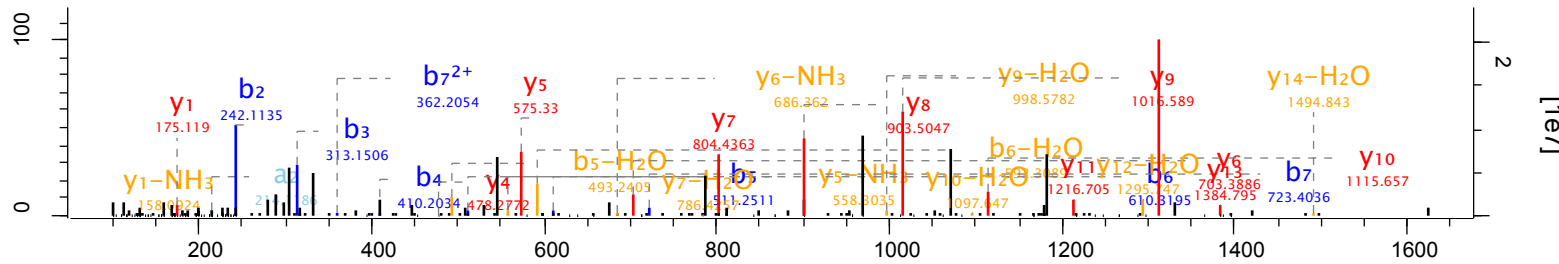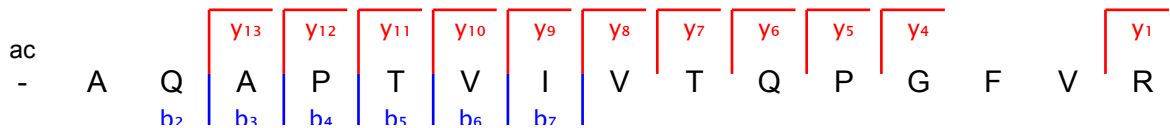

| Raw file                                    | Scan  | Method    | Score  | m/z    | Gene names |
|---------------------------------------------|-------|-----------|--------|--------|------------|
| 20121216_EXQ1_AtDe_50CM_LFQ_myotubes_OG3_11 | 61504 | FTMS; HCD | 106.93 | 934.51 | Gabra3     |

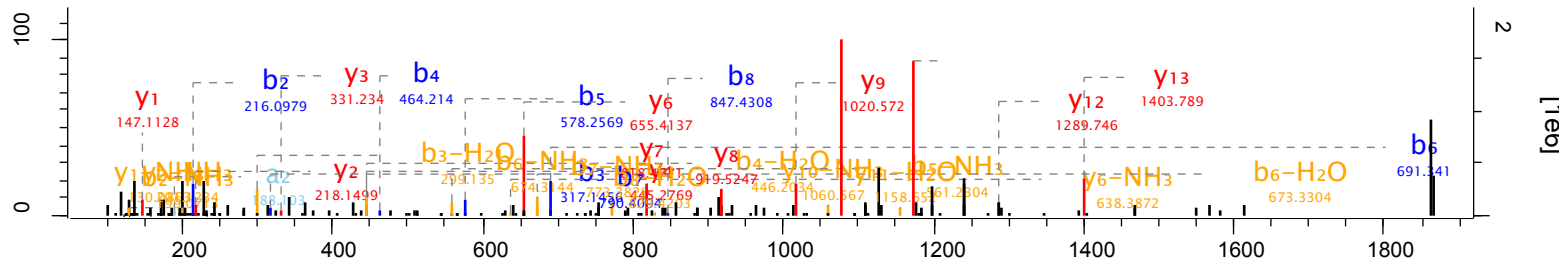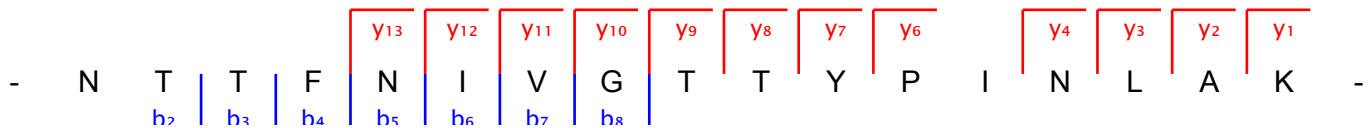



| Raw file                                    | Scan  | Method    | Score | m/z    | Gene names |
|---------------------------------------------|-------|-----------|-------|--------|------------|
| 20121216_EXQ1_AtDe_50CM_LFQ_myotubes_OG3_11 | 62937 | FTMS; HCD | 76.76 | 736.39 | Socs2;Gm98 |

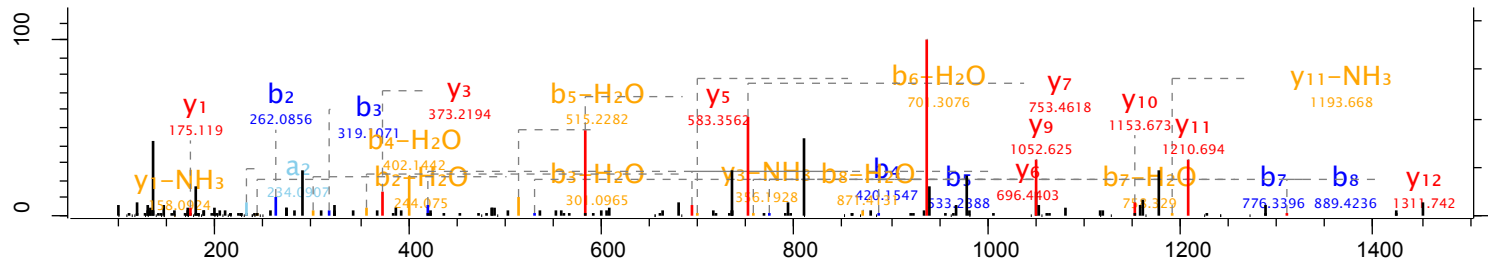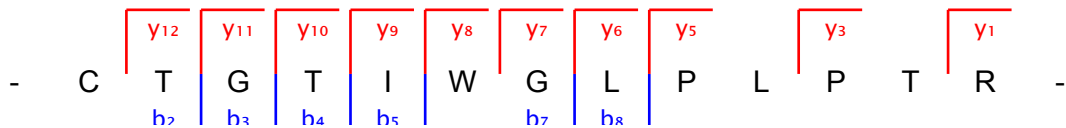

| Raw file                                    | Scan  | Method    | Score | m/z   | Gene names |
|---------------------------------------------|-------|-----------|-------|-------|------------|
| 20121216_EXQ1_AtDe_50CM_LFQ_myotubes_OG3_11 | 63625 | FTMS; HCD | 69.03 | 712.4 | C2cd3      |

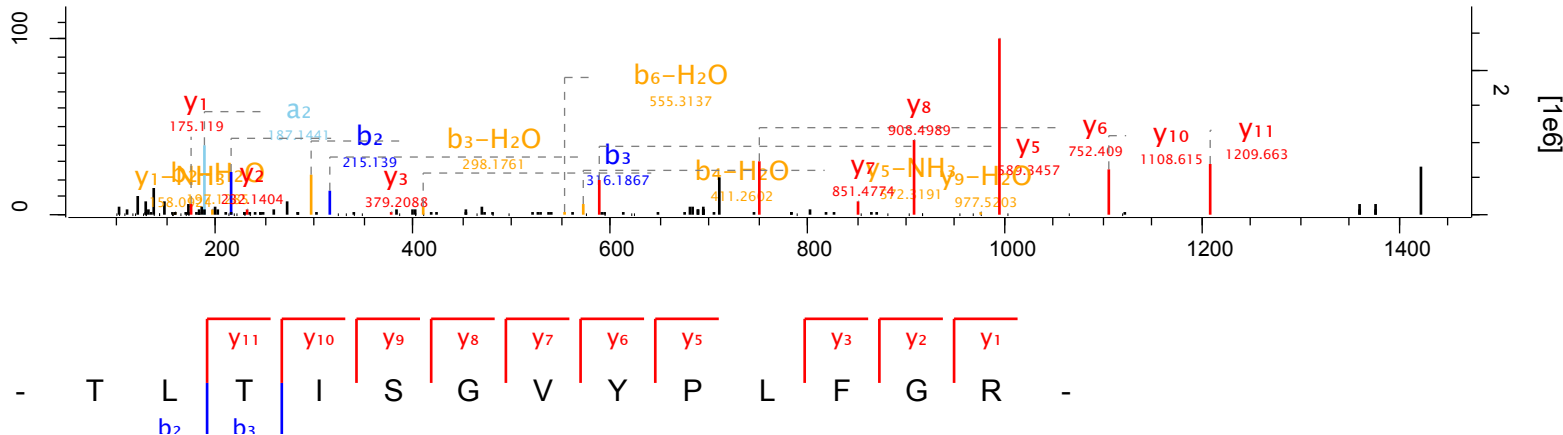

| Raw file                                    | Scan  | Method    | Score | m/z     | Gene name |
|---------------------------------------------|-------|-----------|-------|---------|-----------|
| 20121216_EXQ1_AtDe_50CM_LFQ_myotubes_OG3_11 | 65286 | FTMS; HCD | 90.72 | 1059.58 | Nhs12     |

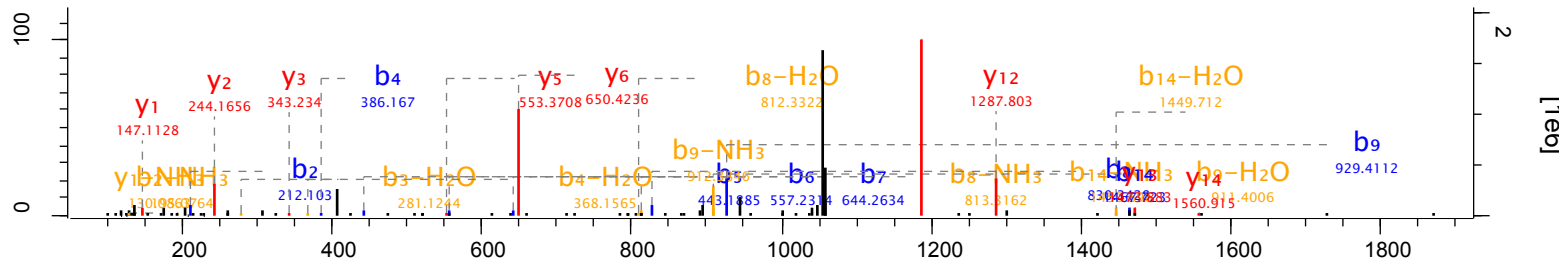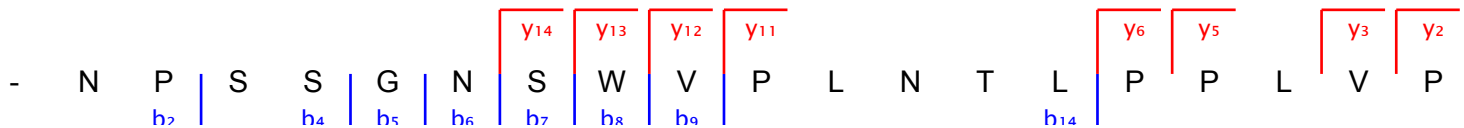

| Raw file                                    | Scan  | Method    | Score | m/z    | Gene names |
|---------------------------------------------|-------|-----------|-------|--------|------------|
| 20121216_EXQ1_AtDe_50CM_LFQ_myotubes_OG3_11 | 66004 | FTMS; HCD | 98.68 | 840.48 | EII2       |

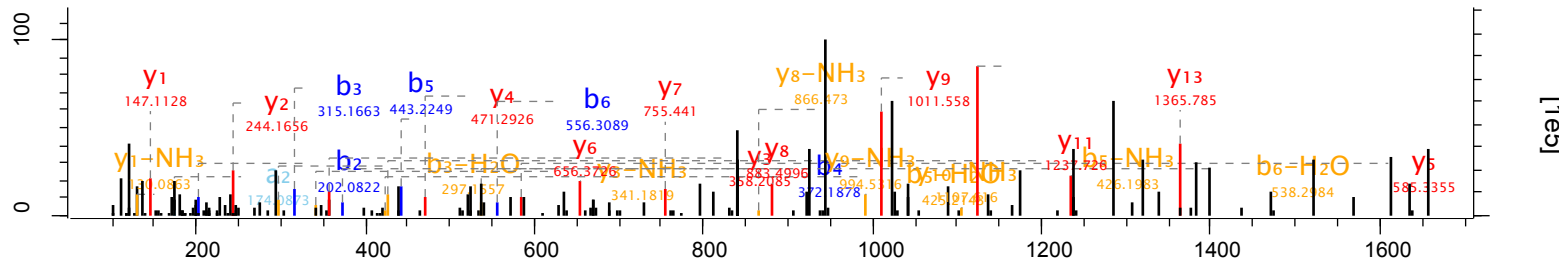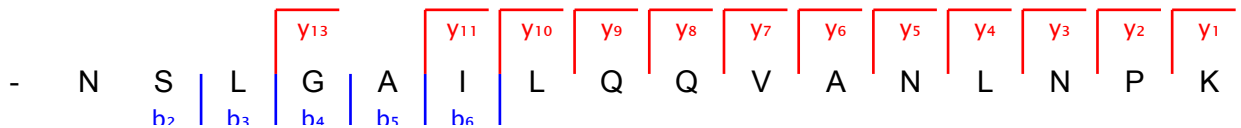

| Raw file                                    | Scan  | Method    | Score  | m/z | Gene names |
|---------------------------------------------|-------|-----------|--------|-----|------------|
| 20121216_EXQ1_AtDe_50CM_LFQ_myotubes_OG3_11 | 68510 | FTMS; HCD | 133.48 | 853 | Gemin7     |

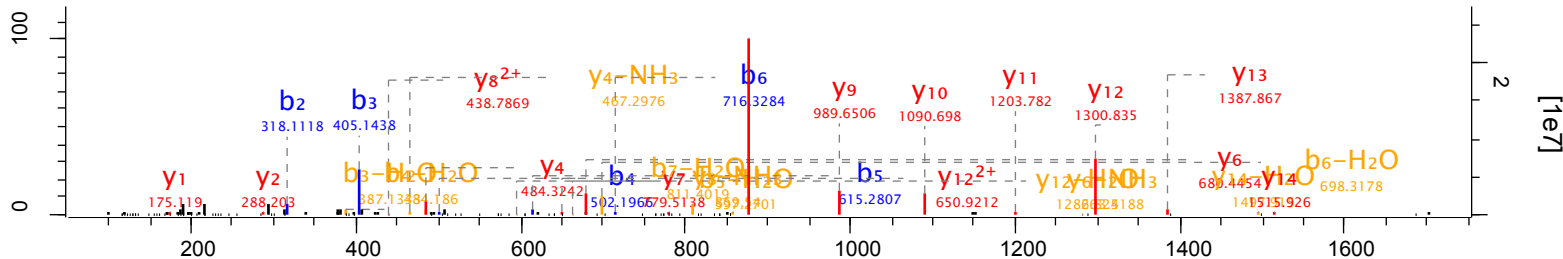

| ac | ox | y14 | y13 | y12 | y11 | y10 | y9 | y8 | y7 | y6 | y4 | y2 | y1 |
|----|----|-----|-----|-----|-----|-----|----|----|----|----|----|----|----|
| -  | M  | Q   | S   | P   | L   | T   | I  | P  | V  | P  | V  | L  | R  |
|    |    | b2  | b3  | b4  | b5  | b6  |    |    |    |    |    |    |    |

| Raw file                                    | Scan  | Method    | Score  | m/z    | Gene names |
|---------------------------------------------|-------|-----------|--------|--------|------------|
| 20121216_EXQ1_AtDe_50CM_LFQ_myotubes_OG3_12 | 11247 | FTMS; HCD | 131.46 | 490.76 | Cacfd1     |

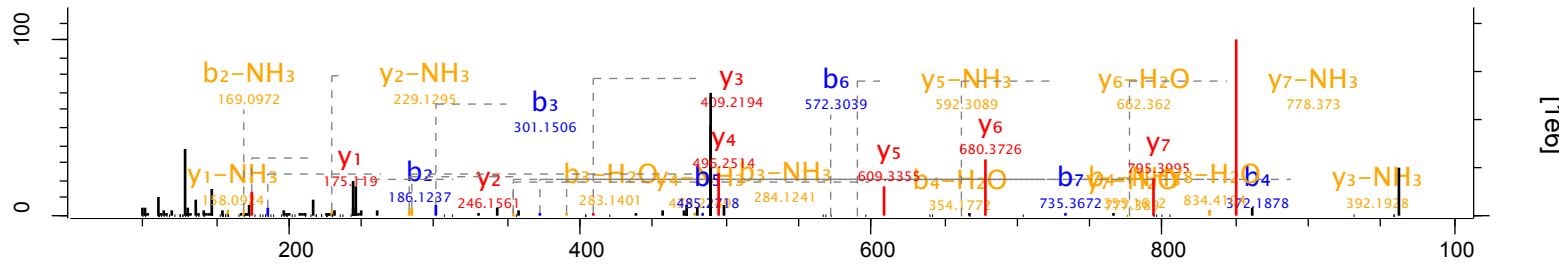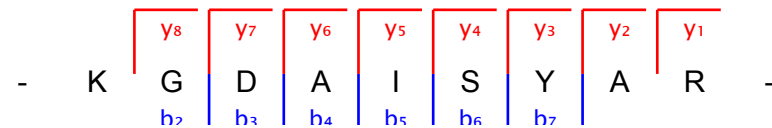

| Raw file                                    | Scan  | Method    | Score  | m/z    | Gene names |
|---------------------------------------------|-------|-----------|--------|--------|------------|
| 20121216_EXQ1_AtDe_50CM_LFQ_myotubes_OG3_12 | 23986 | FTMS; HCD | 126.16 | 584.97 | Hspg2      |

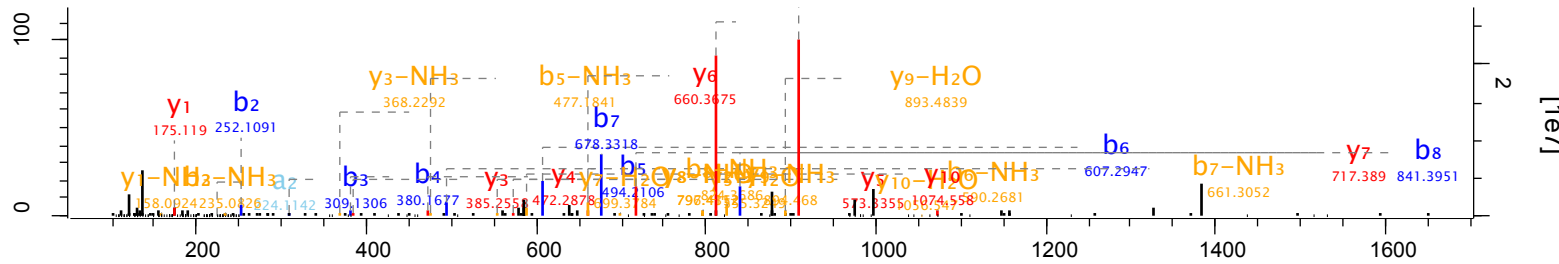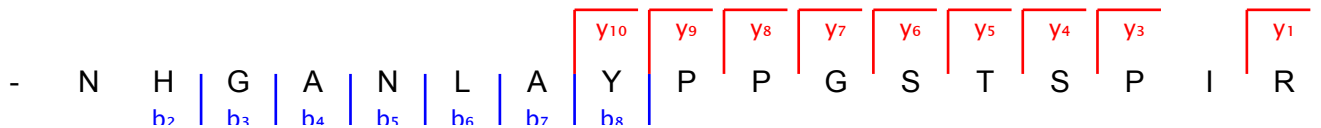

| Raw file                                    | Scan  | Method    | Score | m/z   | Gene names |
|---------------------------------------------|-------|-----------|-------|-------|------------|
| 20121216_EXQ1_AtDe_50CM_LFQ_myotubes_OG3_12 | 24322 | FTMS; HCD | 62.47 | 520.3 | Eya2       |

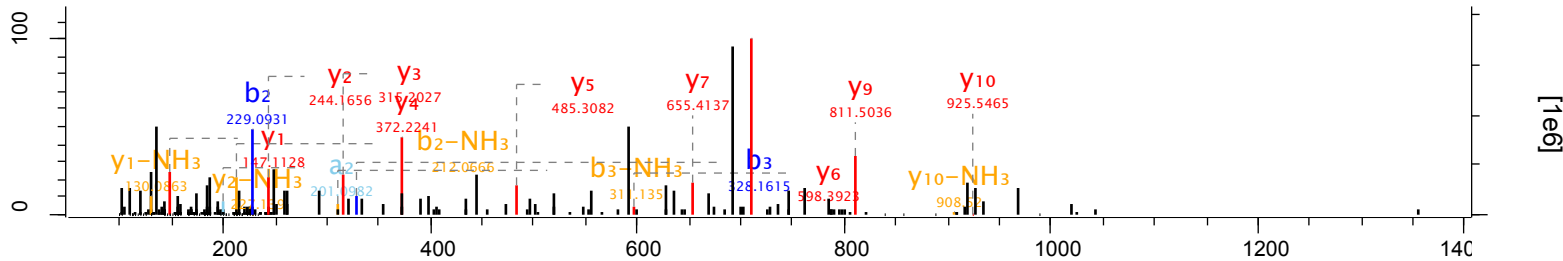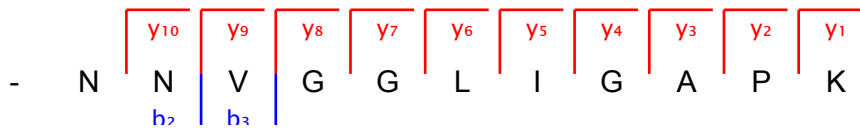



| Raw file                                    | Scan  | Method    | Score  | m/z    | Gene names |
|---------------------------------------------|-------|-----------|--------|--------|------------|
| 20121216_EXQ1_AtDe_50CM_LFQ_myotubes_OG3_12 | 27328 | FTMS; HCD | 164.33 | 587.83 | Syngn2     |

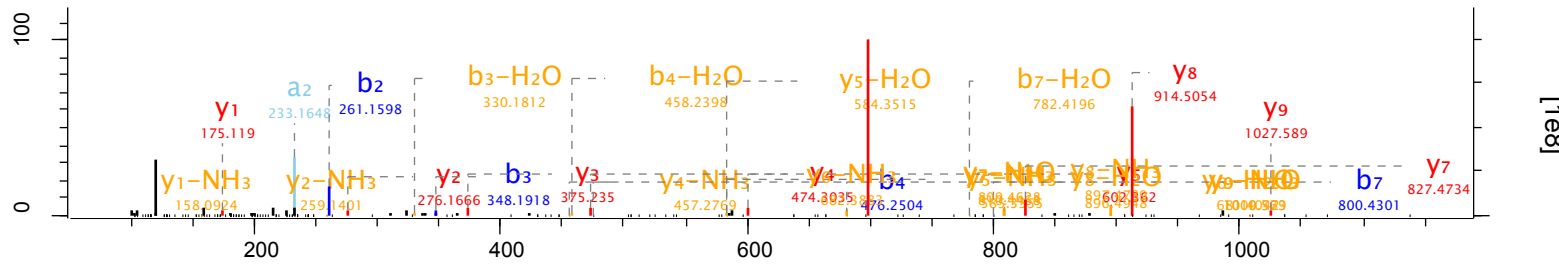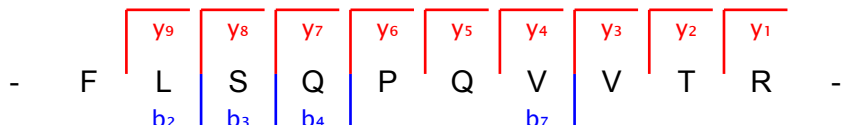

| Raw file                                    | Scan  | Method    | Score | m/z    | Gene names |
|---------------------------------------------|-------|-----------|-------|--------|------------|
| 20121216_EXQ1_AtDe_50CM_LFQ_myotubes_OG3_12 | 31188 | FTMS; HCD | 95.48 | 562.82 | Tmem169    |

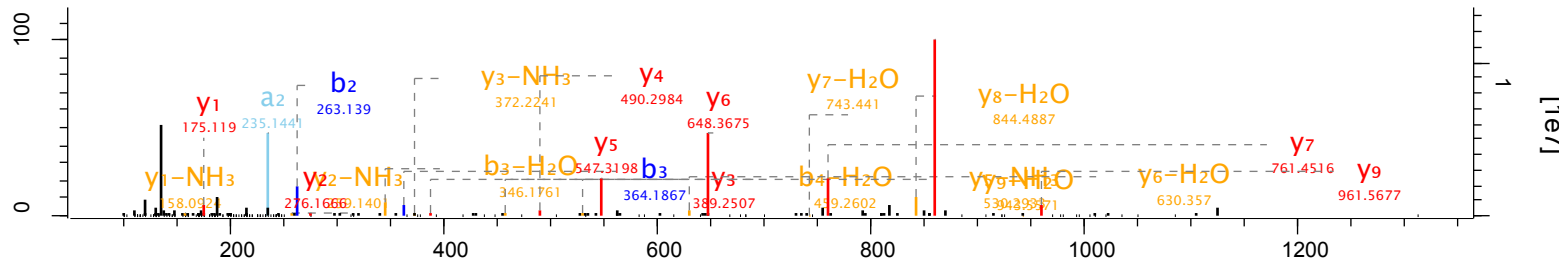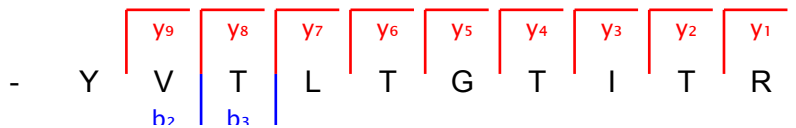

| Raw file                                    | Scan  | Method    | Score | m/z    | Gene names |
|---------------------------------------------|-------|-----------|-------|--------|------------|
| 20121216_EXQ1_AtDe_50CM_LFQ_myotubes_OG3_12 | 38947 | FTMS; HCD | 39.91 | 861.98 | Tanc2      |

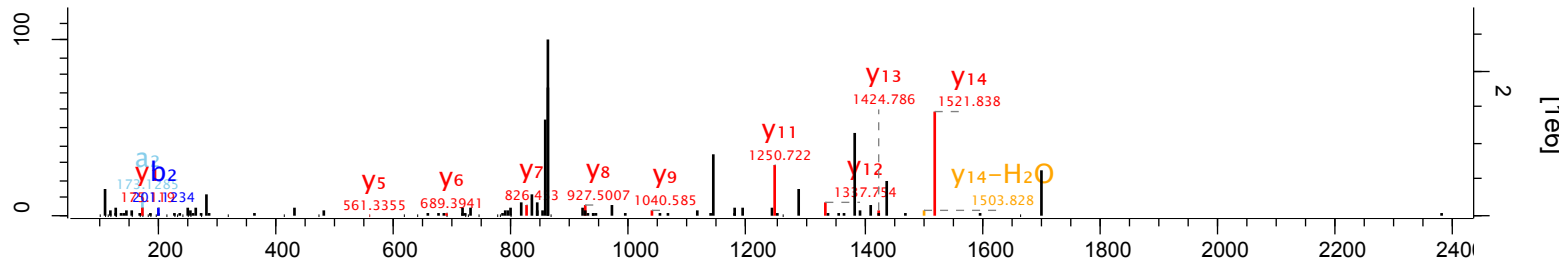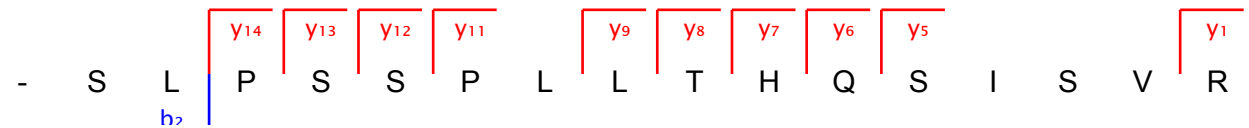

| Raw file                                    | Scan  | Method    | Score  | m/z    | Gene names |
|---------------------------------------------|-------|-----------|--------|--------|------------|
| 20121216_EXQ1_AtDe_50CM_LFQ_myotubes_OG3_12 | 39396 | FTMS; HCD | 103.88 | 574.32 | Ahnak      |

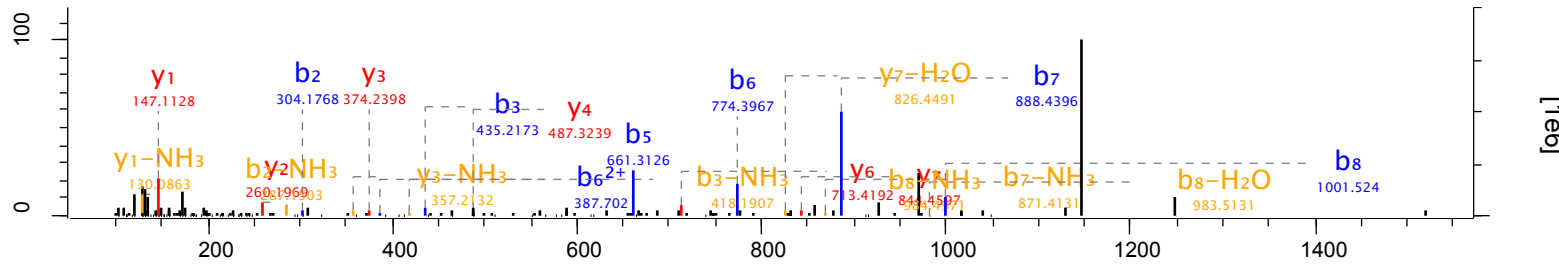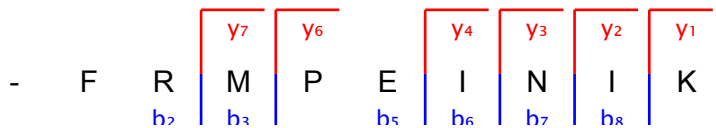

| Raw file                                    | Scan  | Method    | Score | m/z    | Gene names |
|---------------------------------------------|-------|-----------|-------|--------|------------|
| 20121216_EXQ1_AtDe_50CM_LFQ_myotubes_OG3_12 | 39749 | FTMS; HCD | 41.51 | 861.49 | Tanc2      |

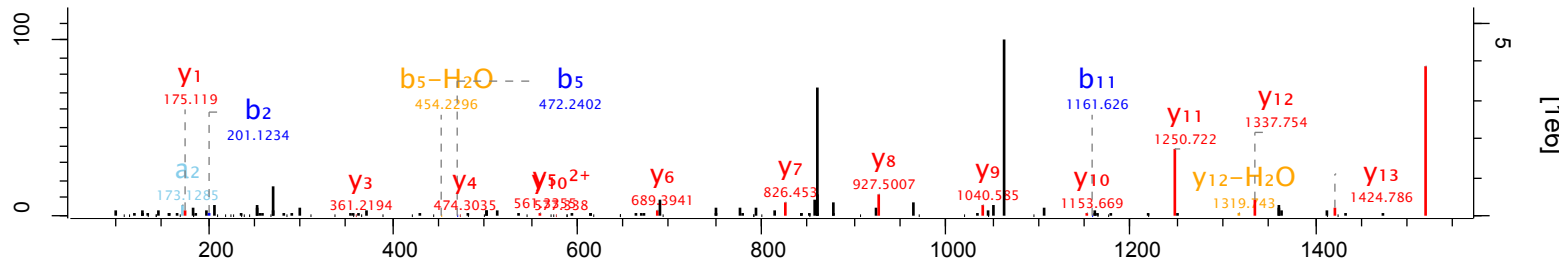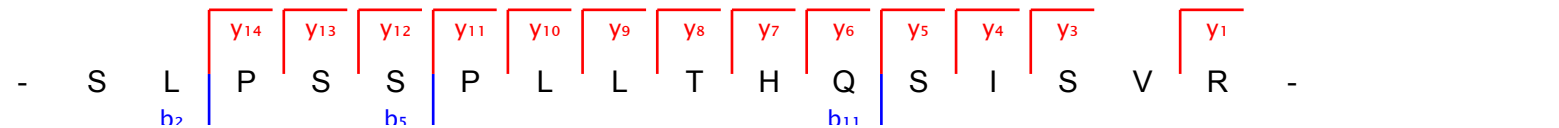

Raw file

20121216\_EXQ1\_AtDe\_50CM\_LFQ\_myotubes\_OG3\_12

Scan

43534

Method

FTMS; HCD

Score

81.02

m/z

760.74

Gene names

Arl10

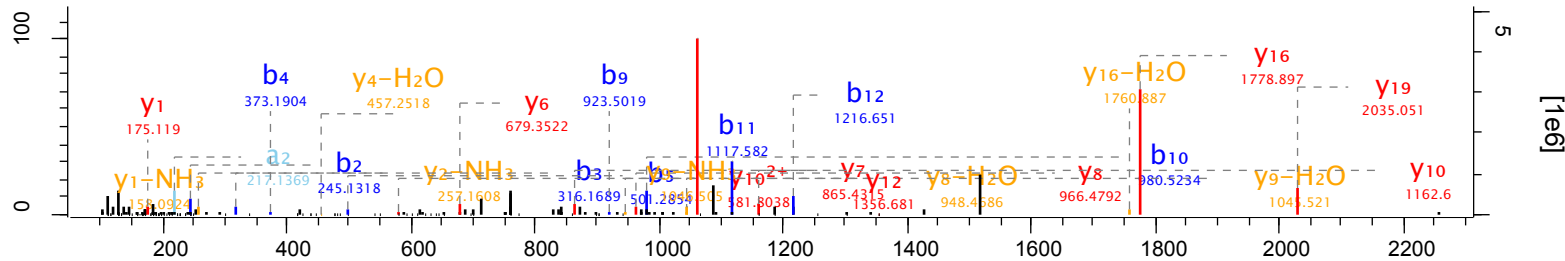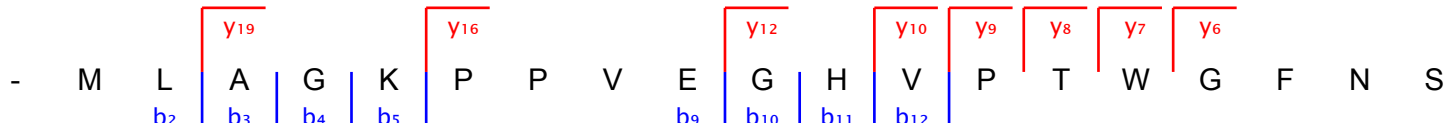

| Raw file                                    | Scan  | Method    | Score  | m/z    | Gene names |
|---------------------------------------------|-------|-----------|--------|--------|------------|
| 20121216_EXQ1_AtDe_50CM_LFQ_myotubes_OG3_12 | 45093 | FTMS; HCD | 110.25 | 773.91 | Adamts16   |

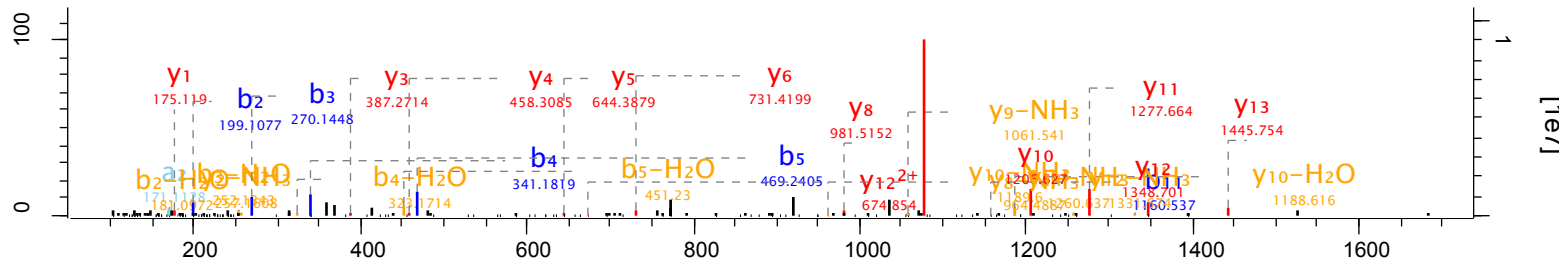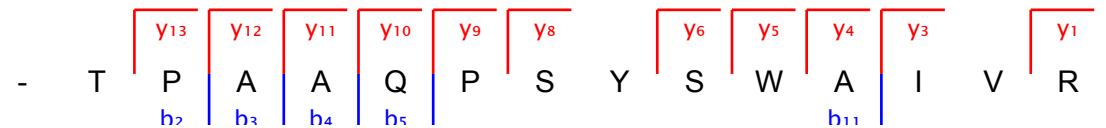

| Raw file                                    | Scan  | Method    | Score | m/z    | Gene names |
|---------------------------------------------|-------|-----------|-------|--------|------------|
| 20121216_EXQ1_AtDe_50CM_LFQ_myotubes_OG3_12 | 45279 | FTMS; HCD | 84.61 | 472.94 | Cables2    |

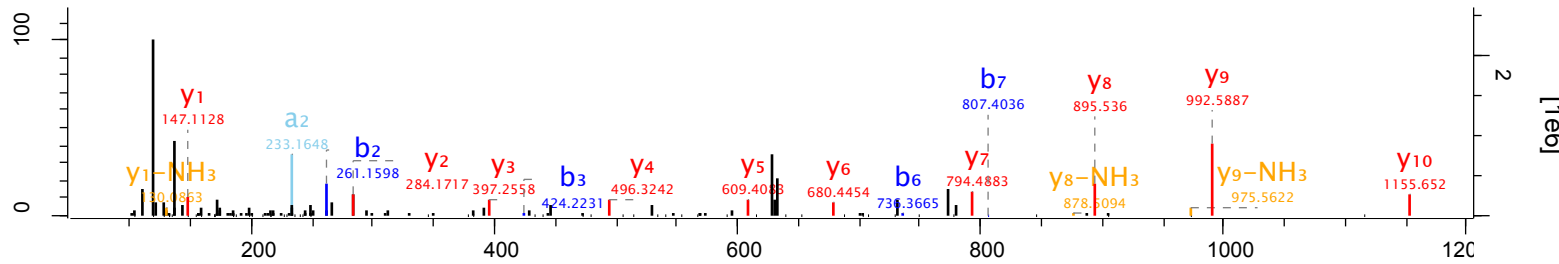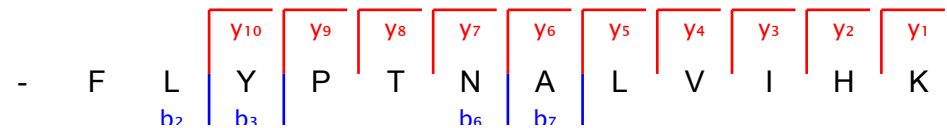



| Raw file                                    | Scan  | Method    | Score | m/z    | Gene names |
|---------------------------------------------|-------|-----------|-------|--------|------------|
| 20121216_EXQ1_AtDe_50CM_LFQ_myotubes_OG3_12 | 45311 | FTMS; HCD | 63.86 | 708.91 | Cables2    |

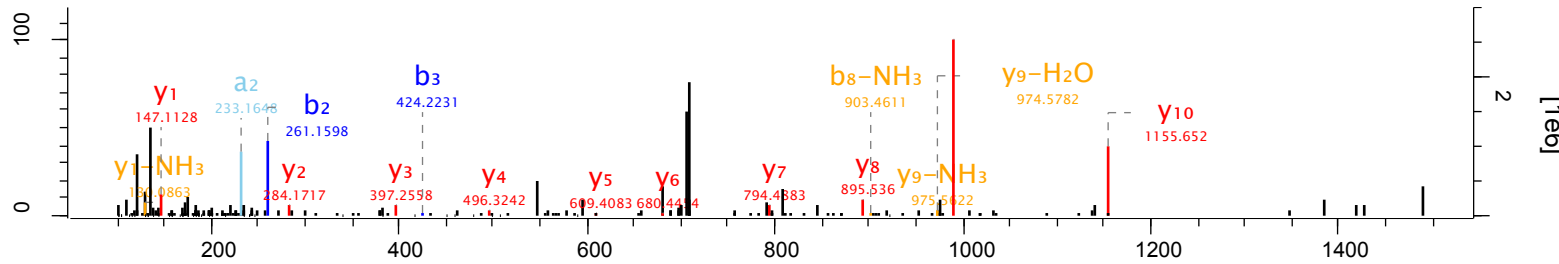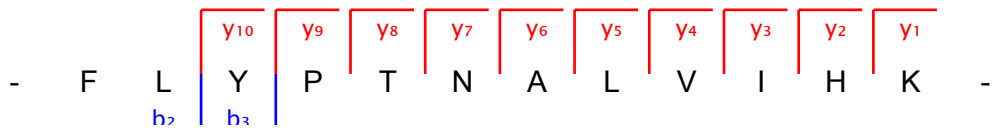

| Raw file                                    | Scan  | Method    | Score | m/z    | Gene names |
|---------------------------------------------|-------|-----------|-------|--------|------------|
| 20121216_EXQ1_AtDe_50CM_LFQ_myotubes_OG3_12 | 46194 | FTMS; HCD | 73.66 | 482.79 | Plch1      |

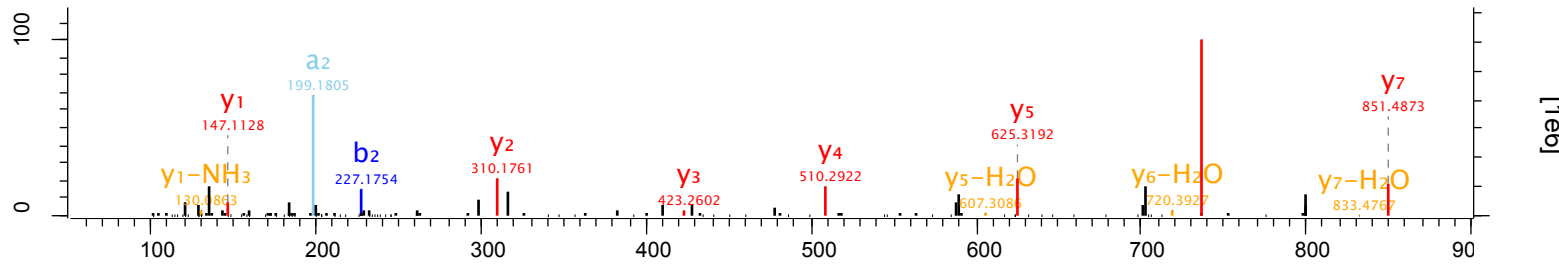

| Raw file                                    | Scan  | Method    | Score | m/z   | Gene names |
|---------------------------------------------|-------|-----------|-------|-------|------------|
| 20121216_EXQ1_AtDe_50CM_LFQ_myotubes_OG3_12 | 46255 | FTMS; HCD | 62.2  | 881.5 | Krtcap2    |

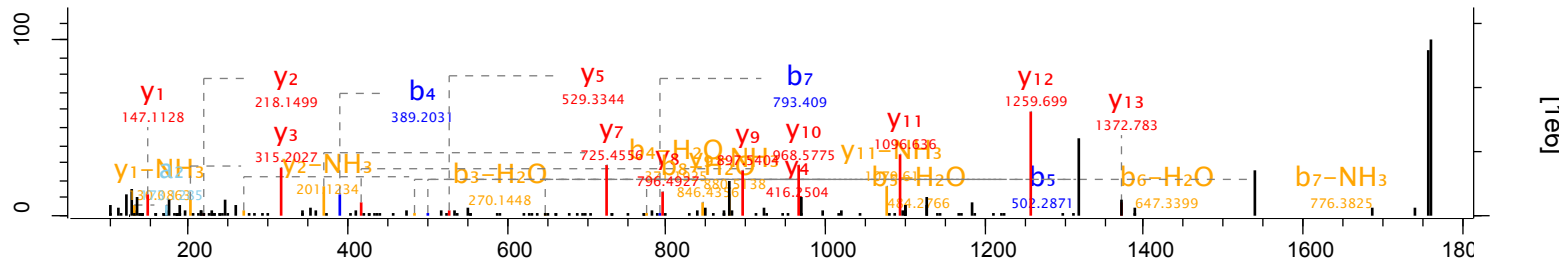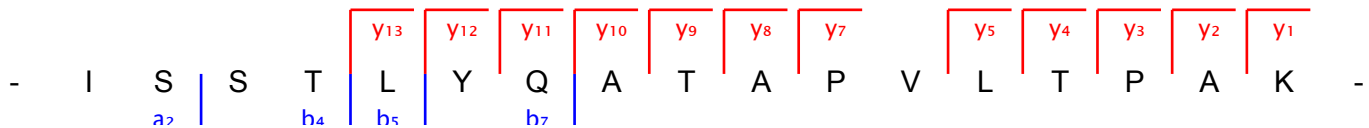

| Raw file                                    | Scan  | Method    | Score  | m/z    | Gene names |
|---------------------------------------------|-------|-----------|--------|--------|------------|
| 20121216_EXQ1_AtDe_50CM_LFQ_myotubes_OG3_12 | 47295 | FTMS; HCD | 142.35 | 880.99 | Krtcap2    |

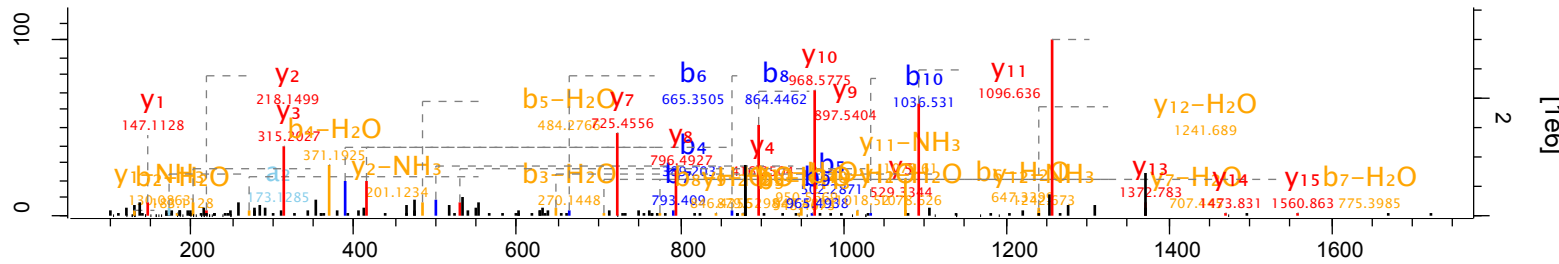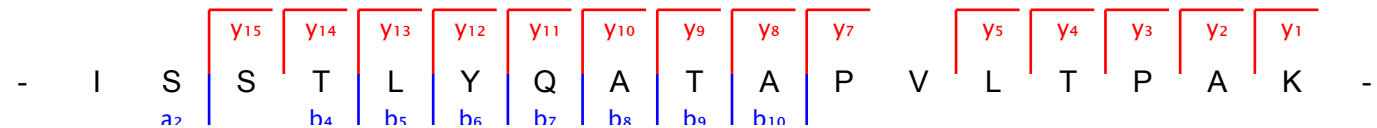

| Raw file                                    | Scan  | Method    | Score | m/z    | Gene names |
|---------------------------------------------|-------|-----------|-------|--------|------------|
| 20121216_EXQ1_AtDe_50CM_LFQ_myotubes_OG3_12 | 47533 | FTMS; HCD | 88.19 | 588.67 | Krtcap2    |

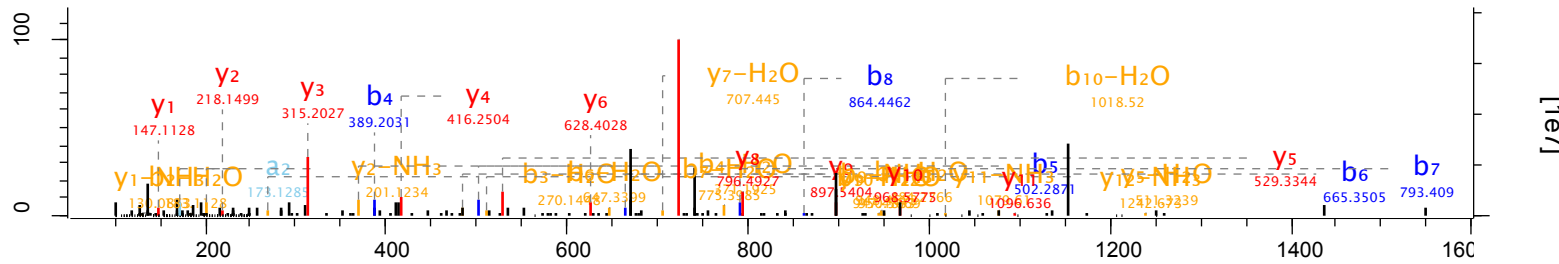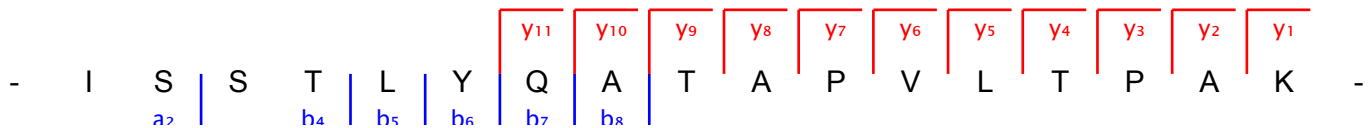

| Raw file                                    | Scan  | Method    | Score  | m/z | Gene names |
|---------------------------------------------|-------|-----------|--------|-----|------------|
| 20121216_EXQ1_AtDe_50CM_LFQ_myotubes_OG3_12 | 47573 | FTMS; HCD | 148.41 | 588 | Krtcap2    |

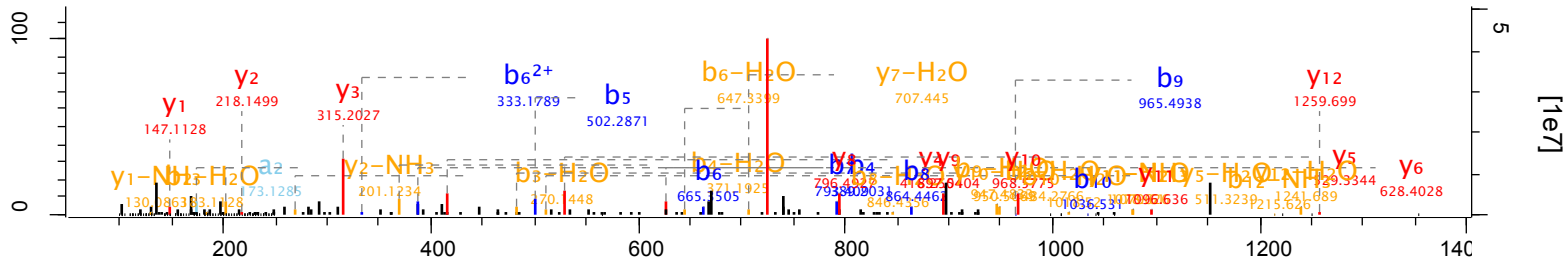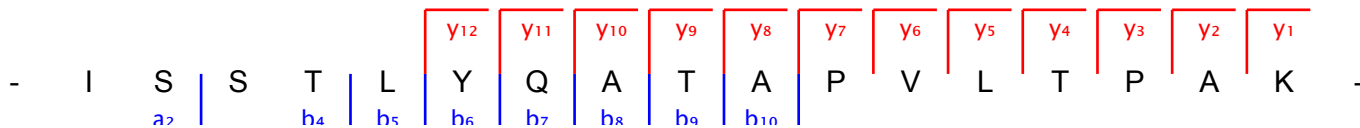

| Raw file                                    | Scan  | Method    | Score  | m/z    | Gene names |
|---------------------------------------------|-------|-----------|--------|--------|------------|
| 20121216_EXQ1_AtDe_50CM_LFQ_myotubes_OG3_12 | 47614 | FTMS; HCD | 157.75 | 538.82 | Nusap1     |

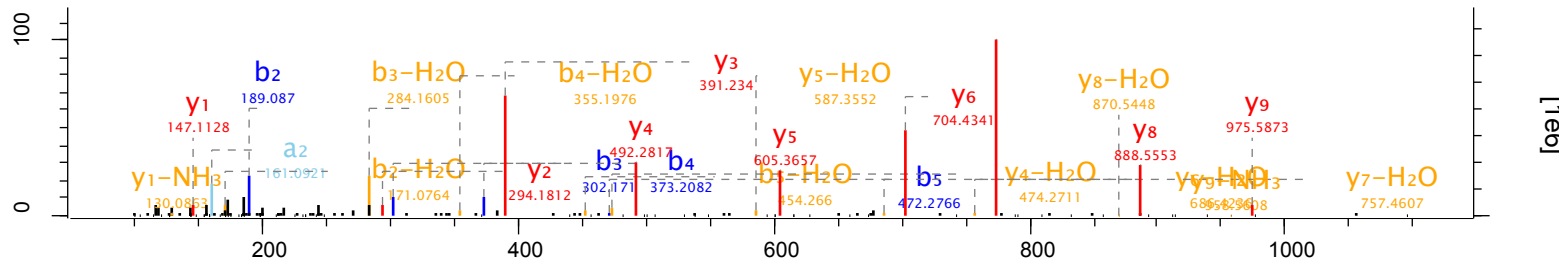

| Raw file                                    | Scan  | Method    | Score  | m/z | Gene names |
|---------------------------------------------|-------|-----------|--------|-----|------------|
| 20121216_EXQ1_AtDe_50CM_LFQ_myotubes_OG3_12 | 47679 | FTMS; HCD | 220.64 | 881 | Krtcap2    |

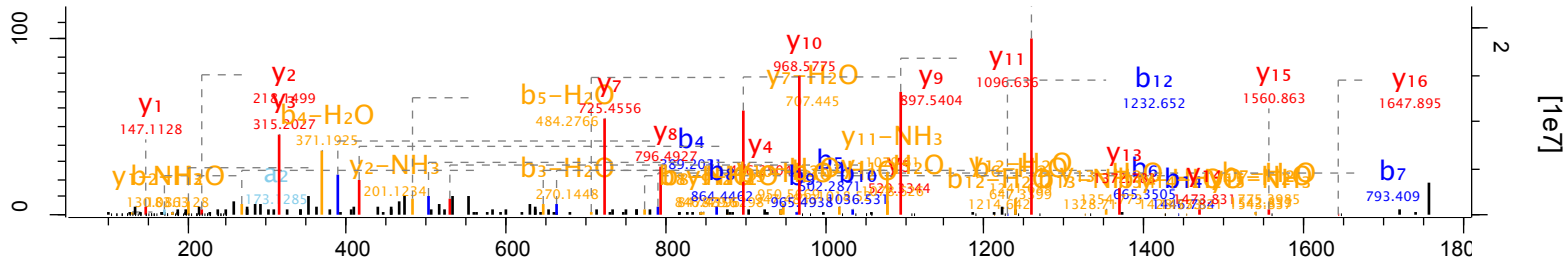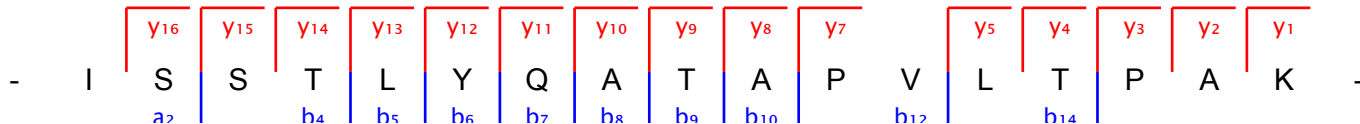



| Raw file                                    | Scan  | Method    | Score | m/z    | Gene names |
|---------------------------------------------|-------|-----------|-------|--------|------------|
| 20121216_EXQ1_AtDe_50CM_LFQ_myotubes_OG3_12 | 49830 | FTMS; HCD | 86.46 | 781.44 | Ptger4     |

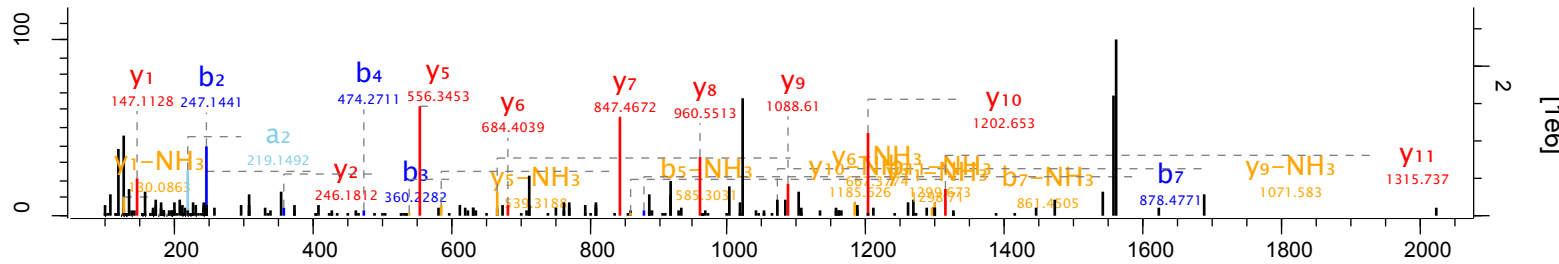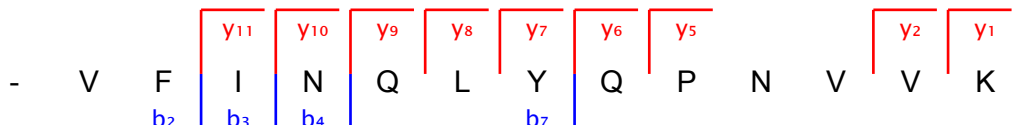

| Raw file                                    | Scan  | Method    | Score | m/z    | Gene names |
|---------------------------------------------|-------|-----------|-------|--------|------------|
| 20121216_EXQ1_AtDe_50CM_LFQ_myotubes_OG3_12 | 50297 | FTMS; HCD | 94.45 | 826.95 | Kremen1    |

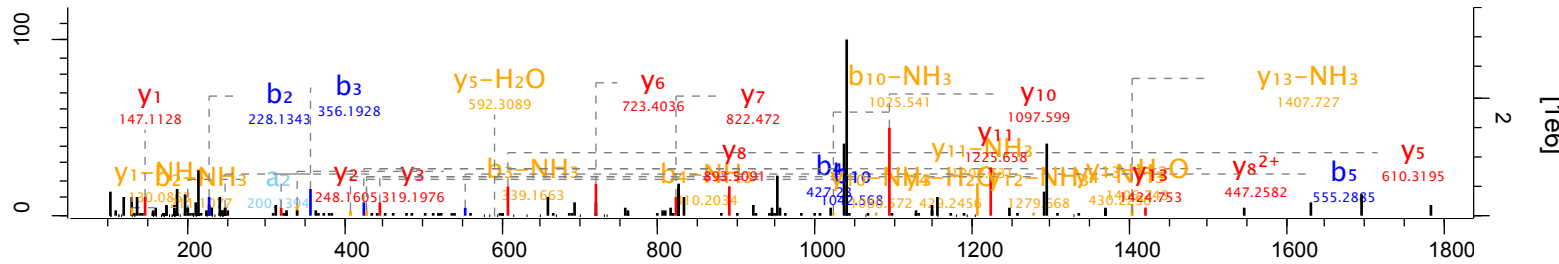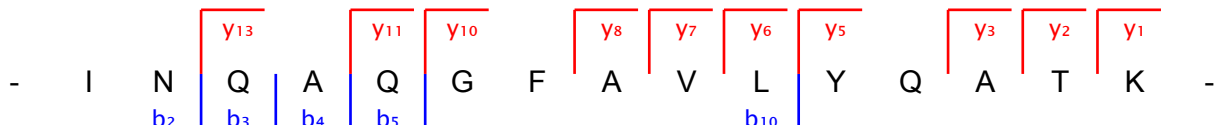

| Raw file                                    | Scan  | Method    | Score  | m/z    | Gene names |
|---------------------------------------------|-------|-----------|--------|--------|------------|
| 20121216_EXQ1_AtDe_50CM_LFQ_myotubes_OG3_12 | 50310 | FTMS; HCD | 116.58 | 826.44 | Kremen1    |

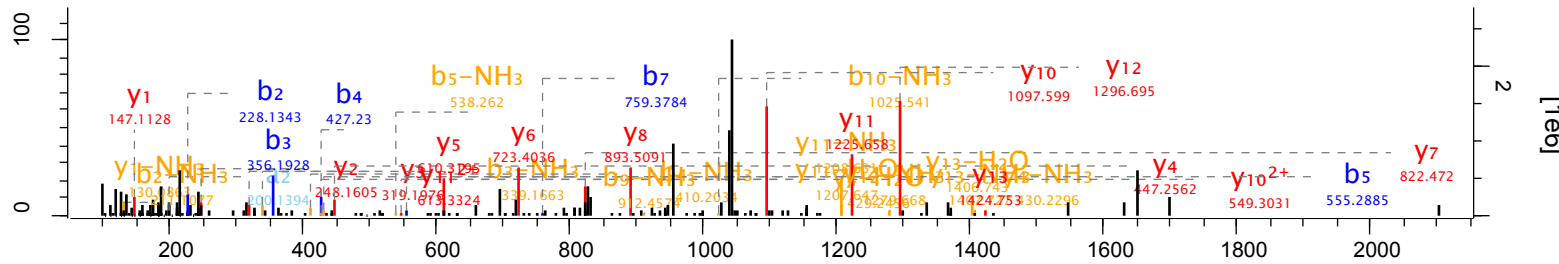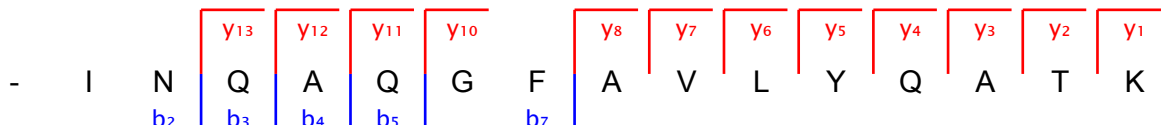

| Raw file                                    | Scan  | Method    | Score | m/z    | Gene names |
|---------------------------------------------|-------|-----------|-------|--------|------------|
| 20121216_EXQ1_AtDe_50CM_LFQ_myotubes_OG3_12 | 54108 | FTMS; HCD | 97.69 | 708.92 | Lphn3      |

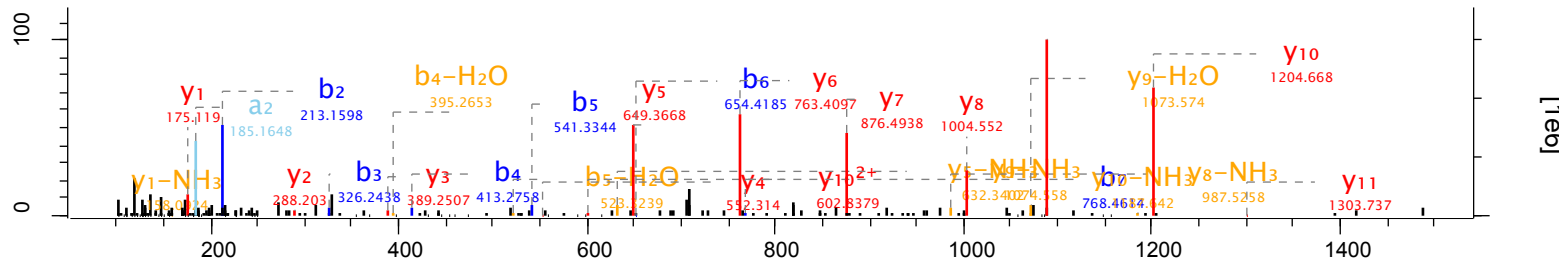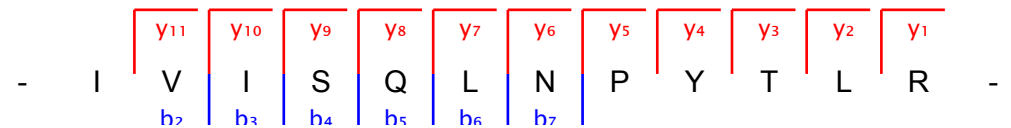

| Raw file                                    | Scan  | Method    | Score | m/z     | Gene name |
|---------------------------------------------|-------|-----------|-------|---------|-----------|
| 20121216_EXQ1_AtDe_50CM_LFQ_myotubes_OG3_12 | 54674 | FTMS; HCD | 98.54 | 1059.52 | Unc50     |

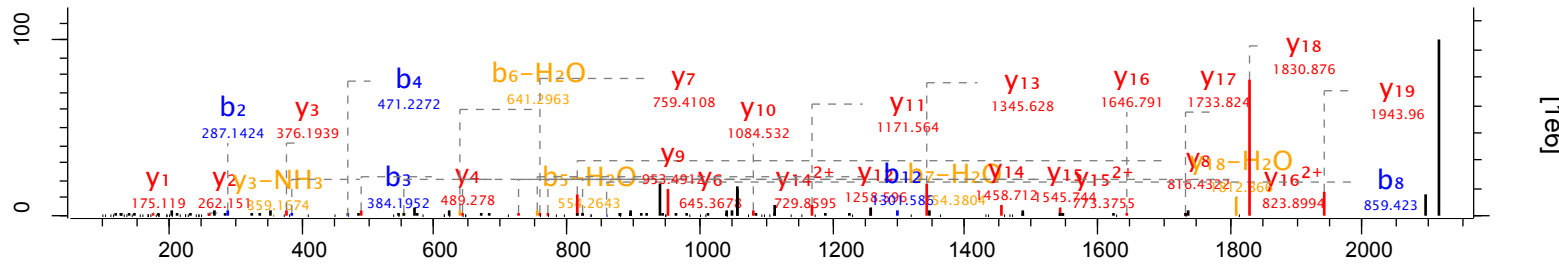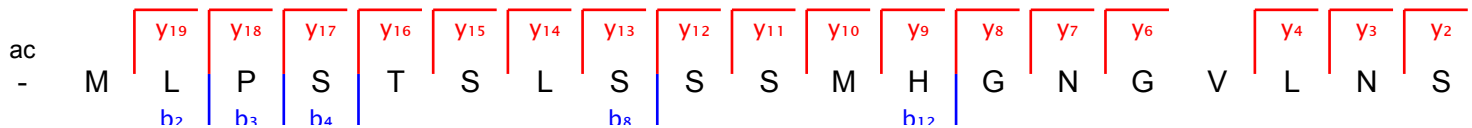

| Raw file                                    | Scan  | Method    | Score | m/z     | Gene name |
|---------------------------------------------|-------|-----------|-------|---------|-----------|
| 20121216_EXQ1_AtDe_50CM_LFQ_myotubes_OG3_12 | 54692 | FTMS; HCD | 88.87 | 1059.01 | Unc50     |

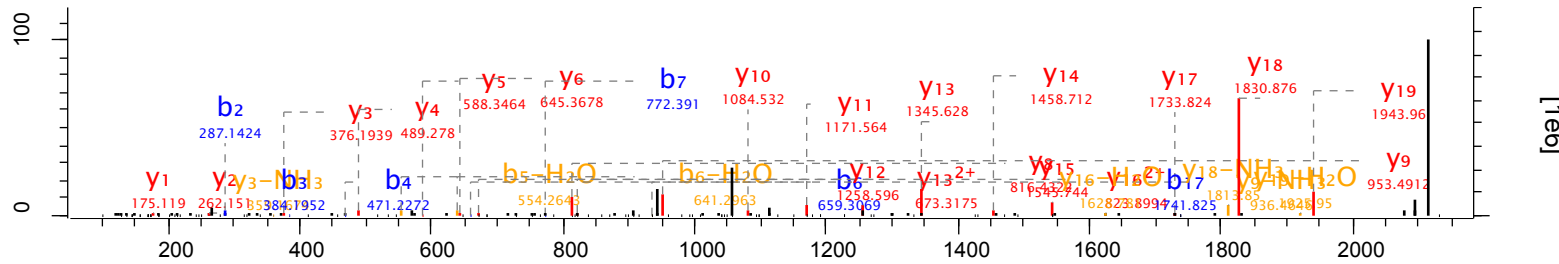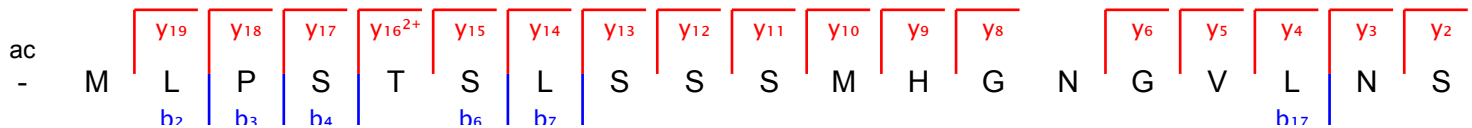

| Raw file                                    | Scan  | Method    | Score | m/z    | Gene names |
|---------------------------------------------|-------|-----------|-------|--------|------------|
| 20121216_EXQ1_AtDe_50CM_LFQ_myotubes_OG3_12 | 59079 | FTMS; HCD | 76.93 | 577.32 | Cmtm6      |

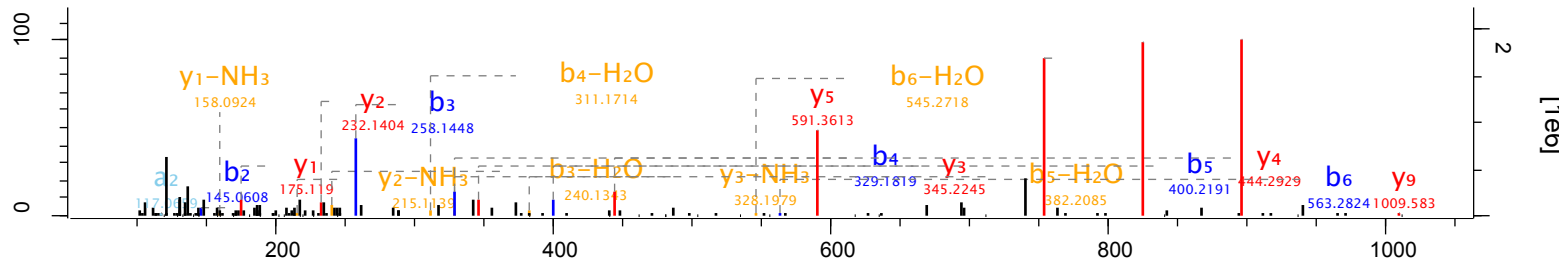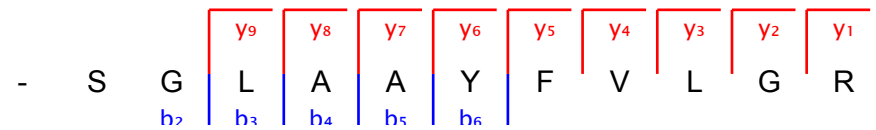

Raw file

20121216\_EXQ1\_AtDe\_50CM\_LFQ\_myotubes\_OG3\_12

Scan

59252

Method

FTMS; HCD

Score

74

m/z

1082.1

Gene names

Mkks

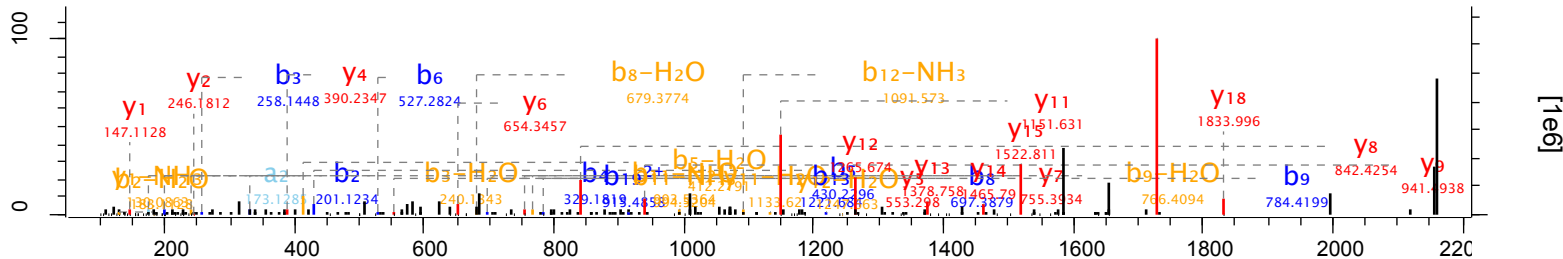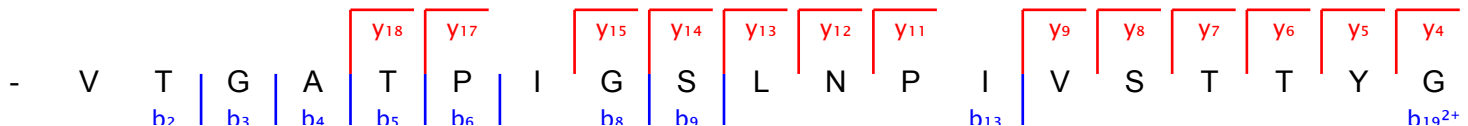



| Raw file                                    | Scan  | Method    | Score  | m/z    | Gene names |
|---------------------------------------------|-------|-----------|--------|--------|------------|
| 20121216_EXQ1_AtDe_50CM_LFQ_myotubes_OG3_12 | 60557 | FTMS; HCD | 106.82 | 841.45 | Mea1       |

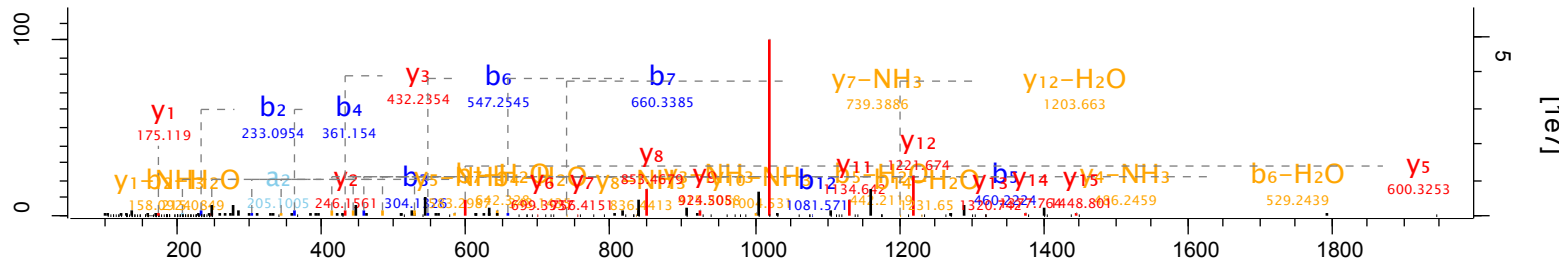

Raw file: 20121216\_EXQ1\_AtDe\_50CM\_LFQ\_myotubes\_OG3\_12  
 Scan: 62852  
 Method: FTMS; HCD  
 Score: 102.57  
 m/z: 736.72  
 Gene names: Piga

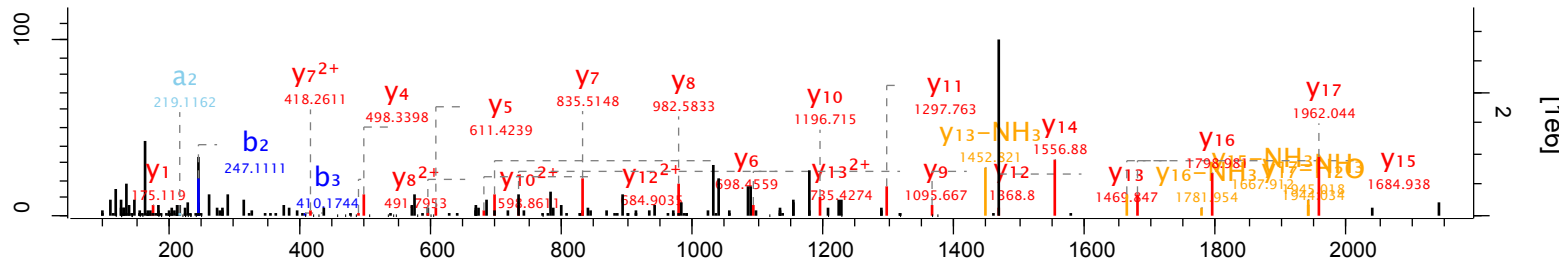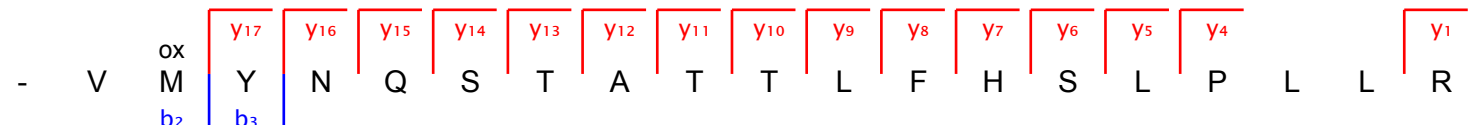

| Raw file                                    | Scan  | Method    | Score | m/z   | Gene names |
|---------------------------------------------|-------|-----------|-------|-------|------------|
| 20121216_EXQ1_AtDe_50CM_LFQ_myotubes_OG3_12 | 63144 | FTMS; HCD | 71.56 | 726.4 | Ptplad2    |

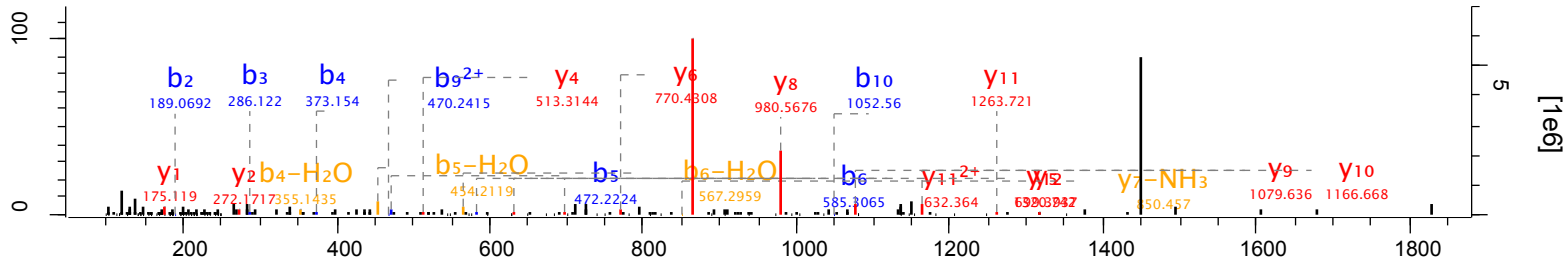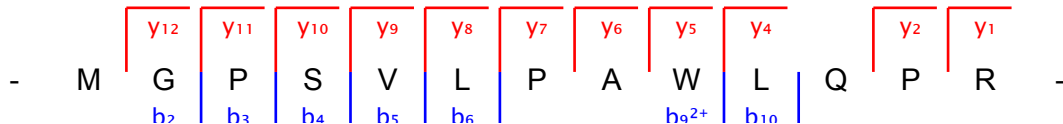

| Raw file                                    | Scan  | Method    | Score  | m/z    | Gene names |
|---------------------------------------------|-------|-----------|--------|--------|------------|
| 20121216_EXQ1_AtDe_50CM_LFQ_myotubes_OG3_12 | 64234 | FTMS; HCD | 119.68 | 995.52 | Kctd1      |

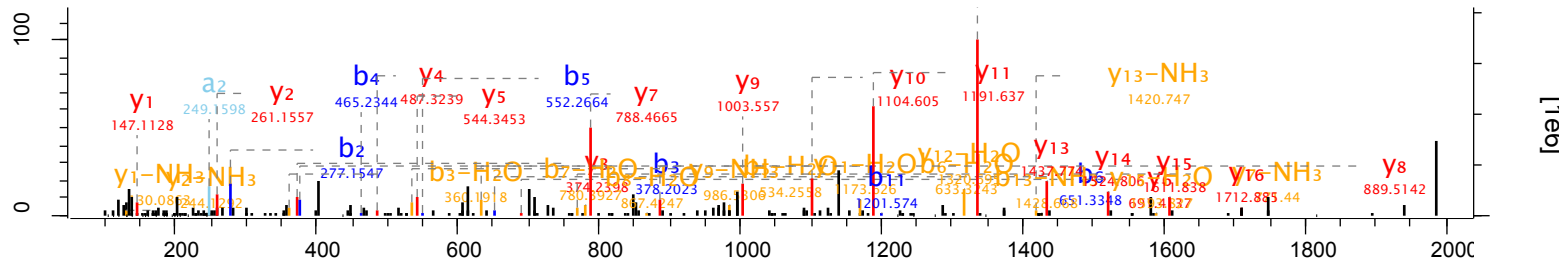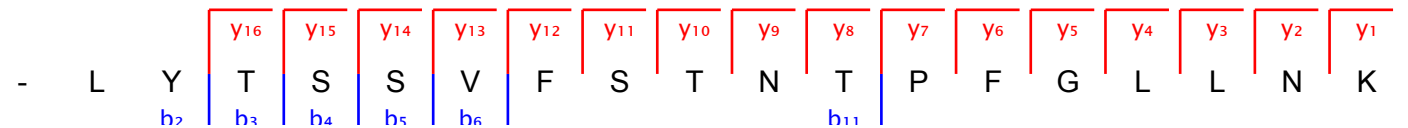

Raw file

Scan

Method

Score

m/z

Gene names

20121216\_EXQ1\_AtDe\_50CM\_LFQ\_myotubes\_OG3\_12

65773

FTMS; HCD

97.77

840.98

EII2

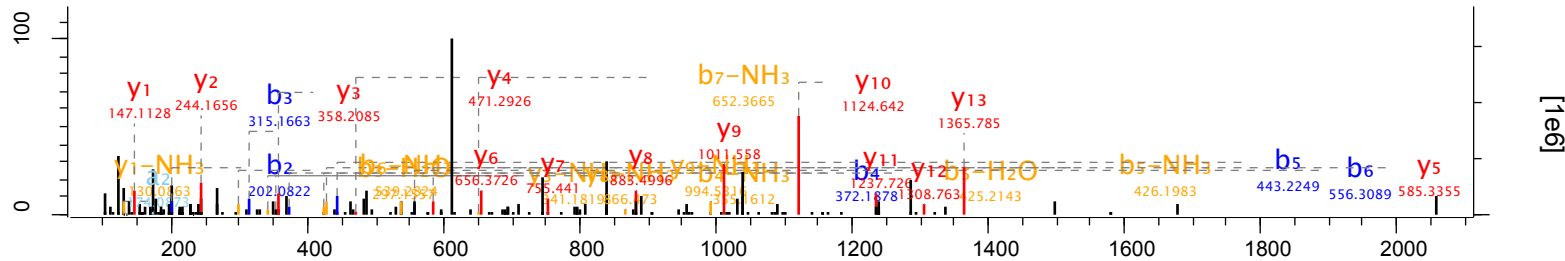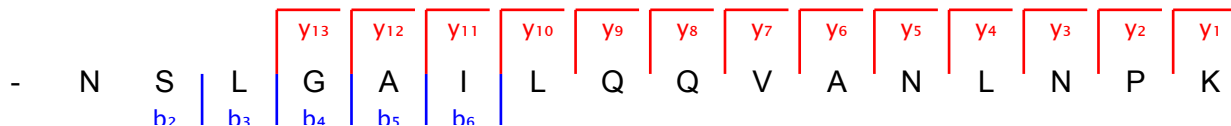

| Raw file                                    | Scan  | Method    | Score | m/z     | Gene name |
|---------------------------------------------|-------|-----------|-------|---------|-----------|
| 20121216_EXQ1_AtDe_50CM_LFQ_myotubes_OG3_12 | 65774 | FTMS; HCD | 77.63 | 1160.18 | Cspp1     |

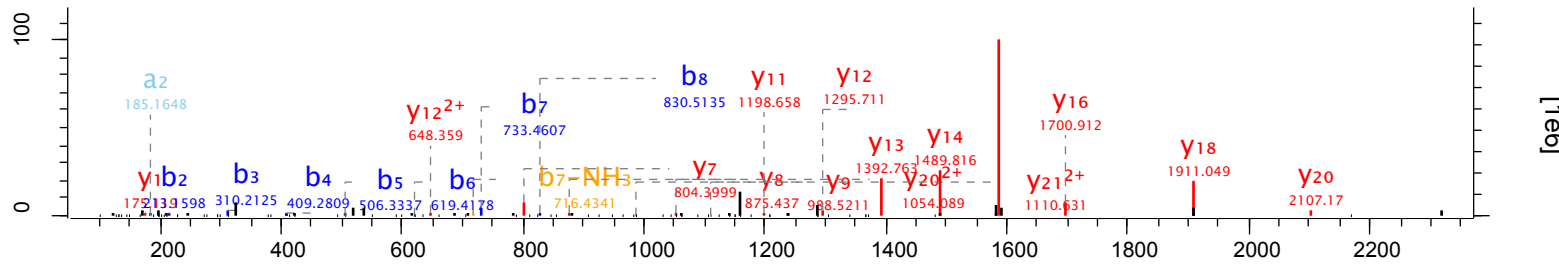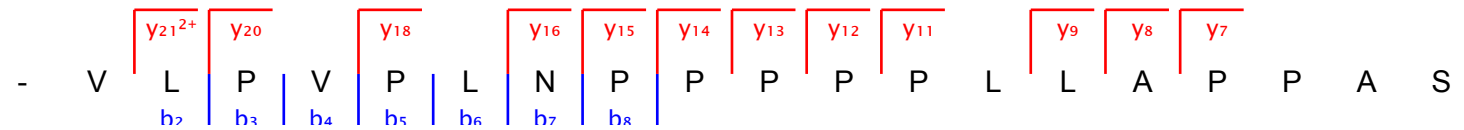

| Raw file                                    | Scan  | Method    | Score | m/z     | Gene name |
|---------------------------------------------|-------|-----------|-------|---------|-----------|
| 20121216_EXQ1_AtDe_50CM_LFQ_myotubes_OG3_12 | 65786 | FTMS; HCD | 52.72 | 1161.18 | Cspp1     |

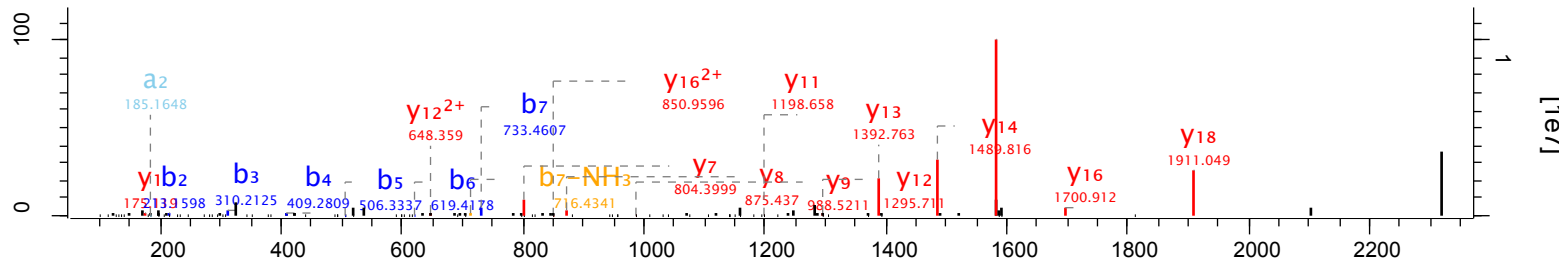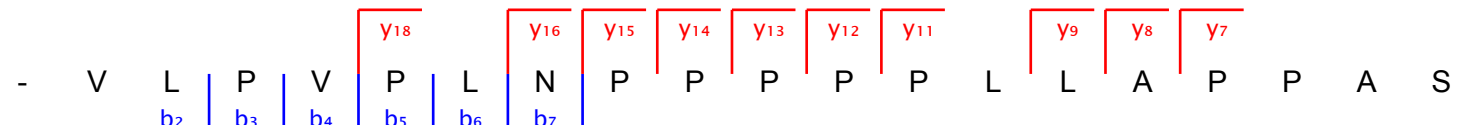

| Raw file                                    | Scan  | Method    | Score | m/z    | Gene names |
|---------------------------------------------|-------|-----------|-------|--------|------------|
| 20121216_EXQ1_AtDe_50CM_LFQ_myotubes_OG3_12 | 65805 | FTMS; HCD | 65.83 | 774.12 | Cspp1      |

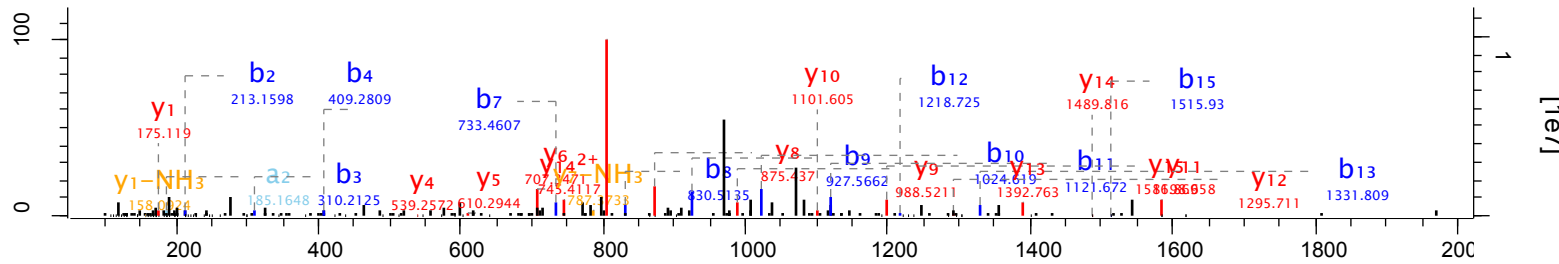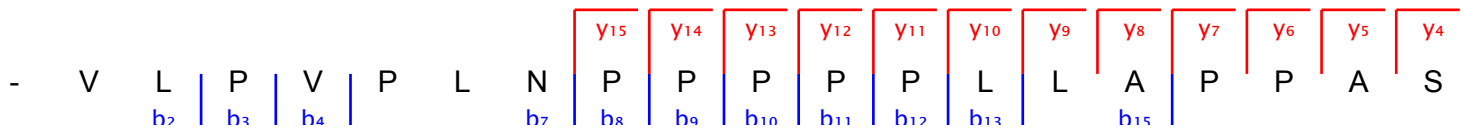



| Raw file                                    | Scan  | Method    | Score  | m/z    | Gene names |
|---------------------------------------------|-------|-----------|--------|--------|------------|
| 20121216_EXQ1_AtDe_50CM_LFQ_myotubes_OG3_12 | 66066 | FTMS; HCD | 177.63 | 718.95 | Slc36a4    |

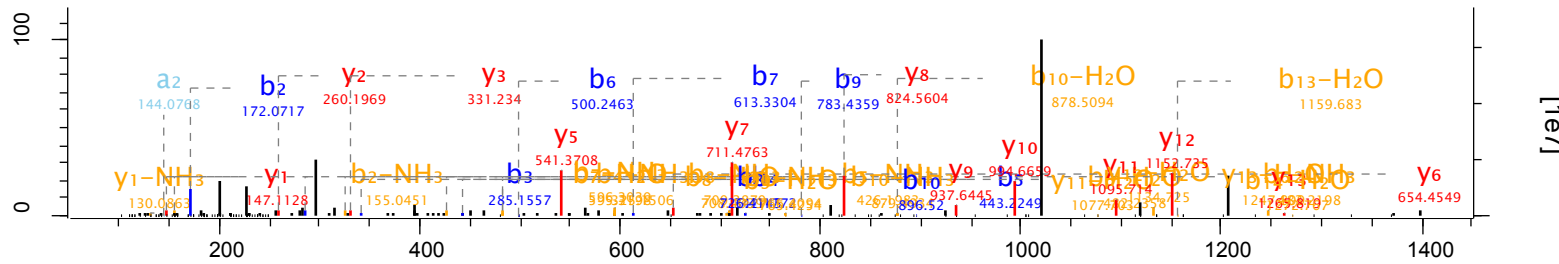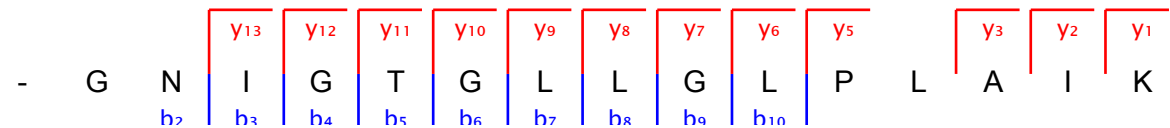

| Raw file                                    | Scan  | Method    | Score | m/z    | Gene names |
|---------------------------------------------|-------|-----------|-------|--------|------------|
| 20121216_EXQ1_AtDe_50CM_LFQ_myotubes_OG3_12 | 67200 | FTMS; HCD | 84.48 | 694.42 | Herc6      |

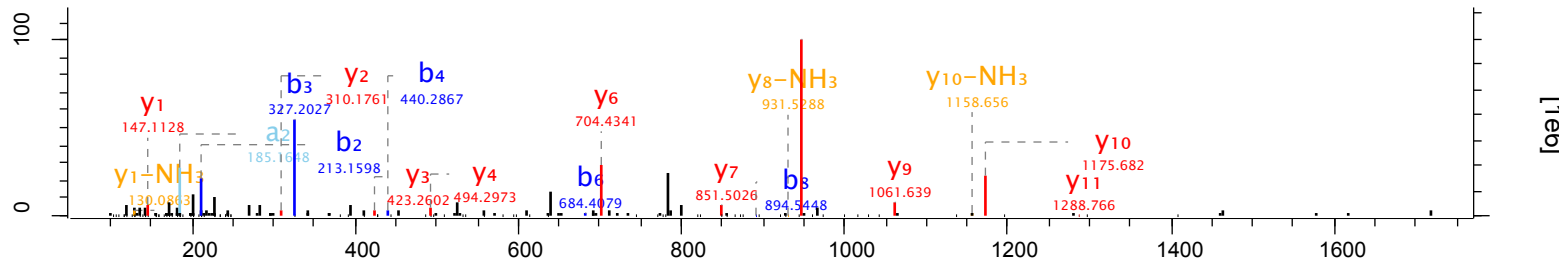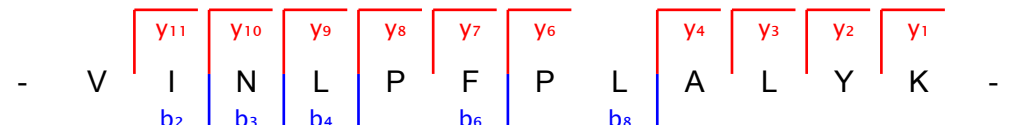

| Raw file                                    | Scan  | Method    | Score  | m/z | Gene names |
|---------------------------------------------|-------|-----------|--------|-----|------------|
| 20121216_EXQ1_AtDe_50CM_LFQ_myotubes_OG3_12 | 68347 | FTMS; HCD | 123.29 | 853 | Gemin7     |

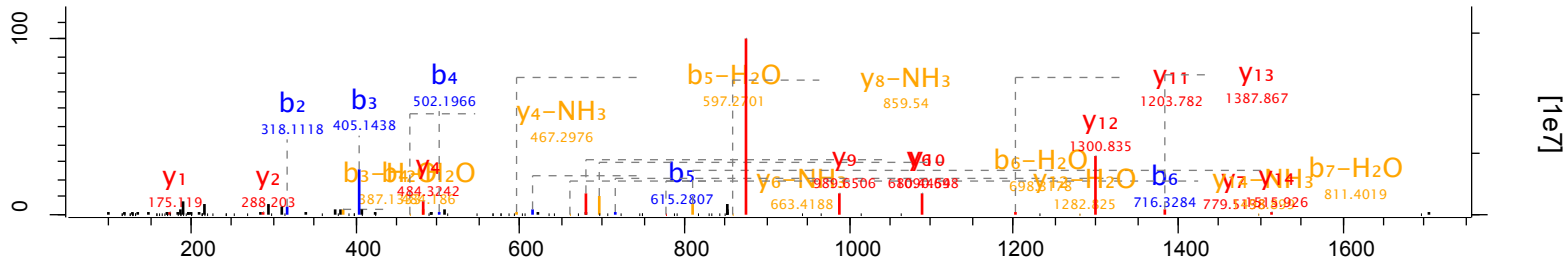

| ac | ox | y14 | y13 | y12 | y11 | y10 | y9 | y8 | y7 | y6 | y4 | y2 | y1 |
|----|----|-----|-----|-----|-----|-----|----|----|----|----|----|----|----|
| -  | M  | Q   | S   | P   | L   | T   | I  | P  | V  | P  | V  | L  | R  |
|    |    | b2  | b3  | b4  | b5  | b6  |    |    |    |    |    |    |    |

| Raw file                                   | Scan  | Method    | Score  | m/z    | Gene names |
|--------------------------------------------|-------|-----------|--------|--------|------------|
| 20121216_EXQ1_AtDe_50CM_LFQ_myotubes_OG3_2 | 14899 | FTMS; HCD | 106.31 | 651.29 | Ing1       |

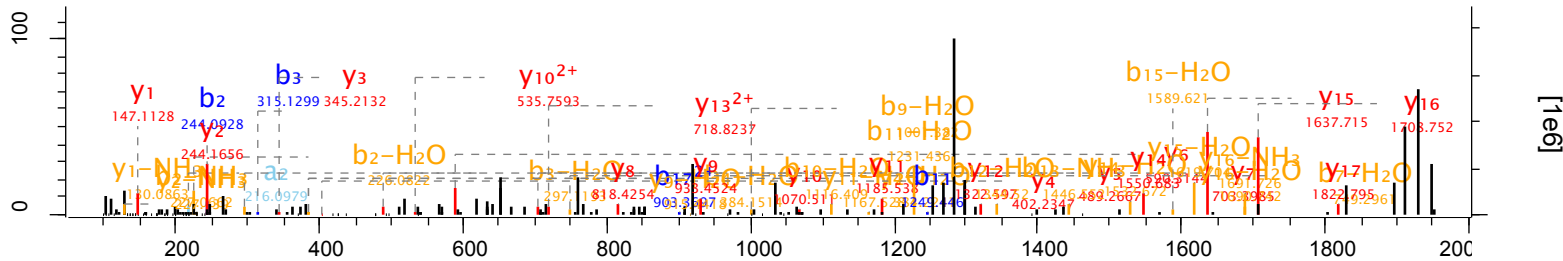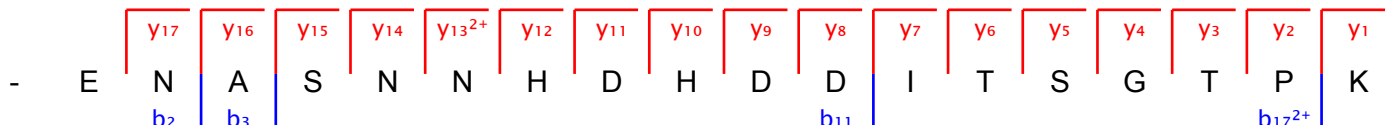



| Raw file                                   | Scan  | Method    | Score | m/z    | Gene names |
|--------------------------------------------|-------|-----------|-------|--------|------------|
| 20121216_EXQ1_AtDe_50CM_LFQ_myotubes_OG3_2 | 16096 | FTMS; HCD | 96.6  | 617.29 | Slc18b1    |

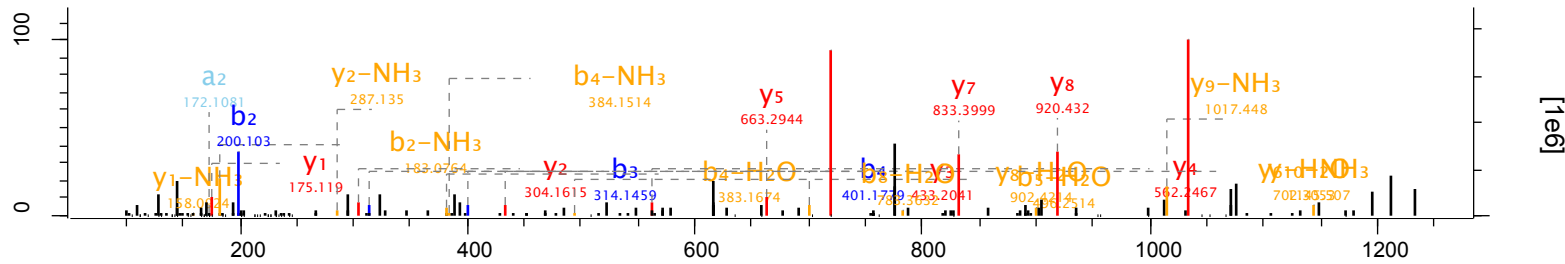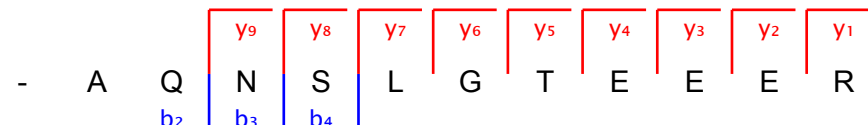

| Raw file                                   | Scan  | Method    | Score | m/z    | Gene names |
|--------------------------------------------|-------|-----------|-------|--------|------------|
| 20121216_EXQ1_AtDe_50CM_LFQ_myotubes_OG3_2 | 17155 | FTMS; HCD | 84.82 | 654.31 | Trim75     |

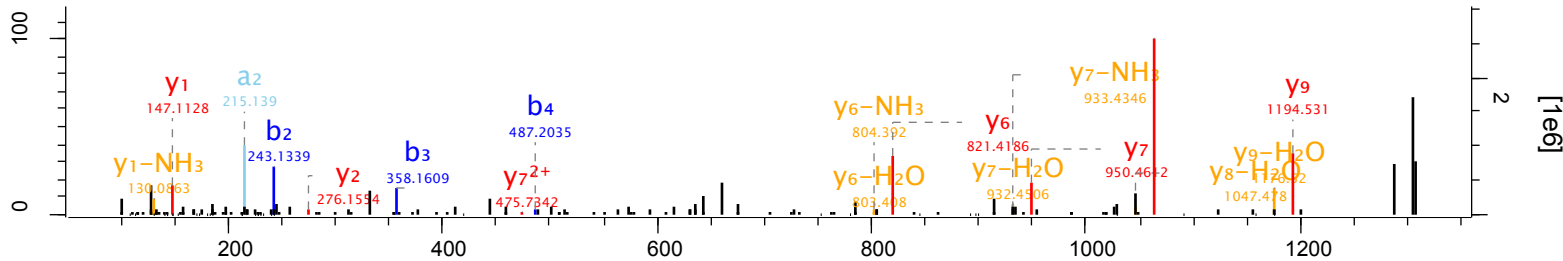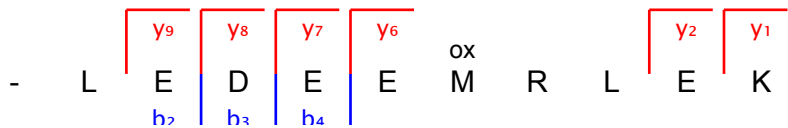

| Raw file                                   | Scan  | Method    | Score | m/z    | Gene names |
|--------------------------------------------|-------|-----------|-------|--------|------------|
| 20121216_EXQ1_AtDe_50CM_LFQ_myotubes_OG3_2 | 17567 | FTMS; HCD | 59.15 | 542.77 | Rgs13      |

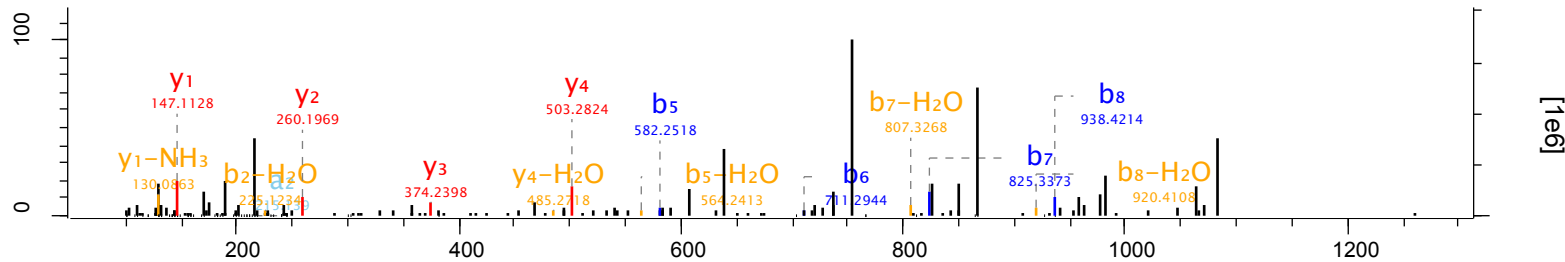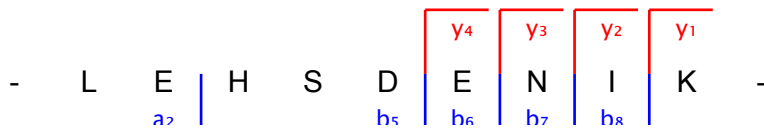



| Raw file                                   | Scan  | Method    | Score | m/z    | Gene names |
|--------------------------------------------|-------|-----------|-------|--------|------------|
| 20121216_EXQ1_AtDe_50CM_LFQ_myotubes_OG3_2 | 18022 | FTMS; HCD | 72.93 | 542.77 | Rgs13      |

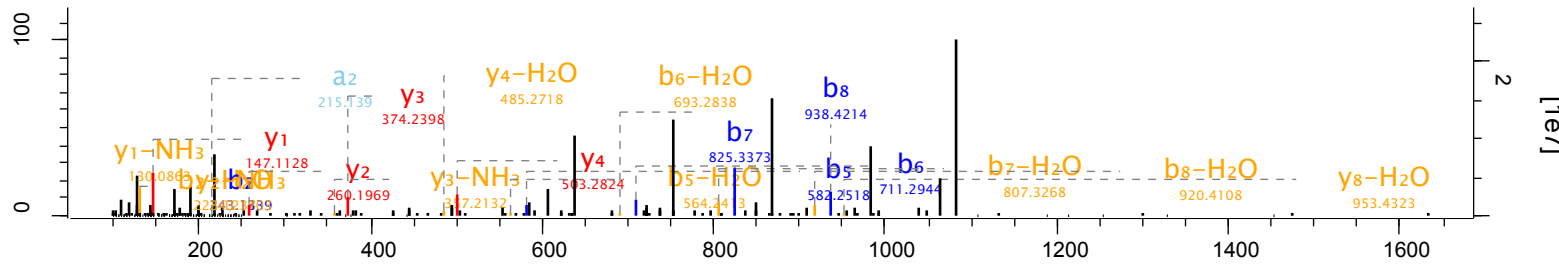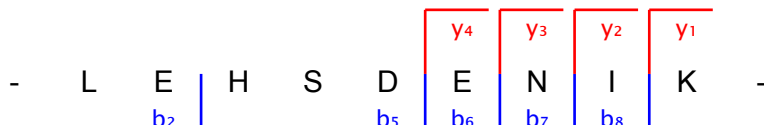



| Raw file                                   | Scan  | Method    | Score  | m/z    | Gene names |
|--------------------------------------------|-------|-----------|--------|--------|------------|
| 20121216_EXQ1_AtDe_50CM_LFQ_myotubes_OG3_2 | 32611 | FTMS; HCD | 120.57 | 501.24 | Wbp5       |

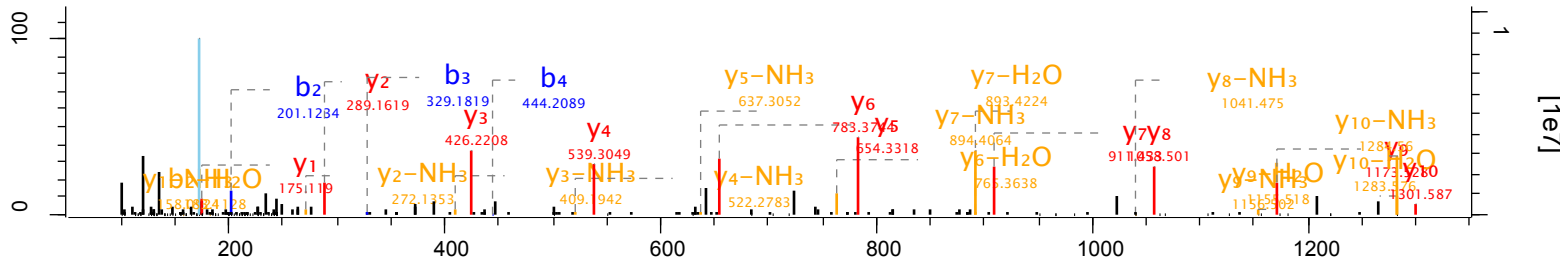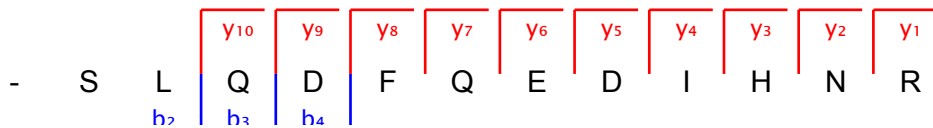

| Raw file                                   | Scan  | Method    | Score | m/z    | Gene names |
|--------------------------------------------|-------|-----------|-------|--------|------------|
| 20121216_EXQ1_AtDe_50CM_LFQ_myotubes_OG3_2 | 35250 | FTMS; HCD | 95.96 | 835.43 | Efcab3     |

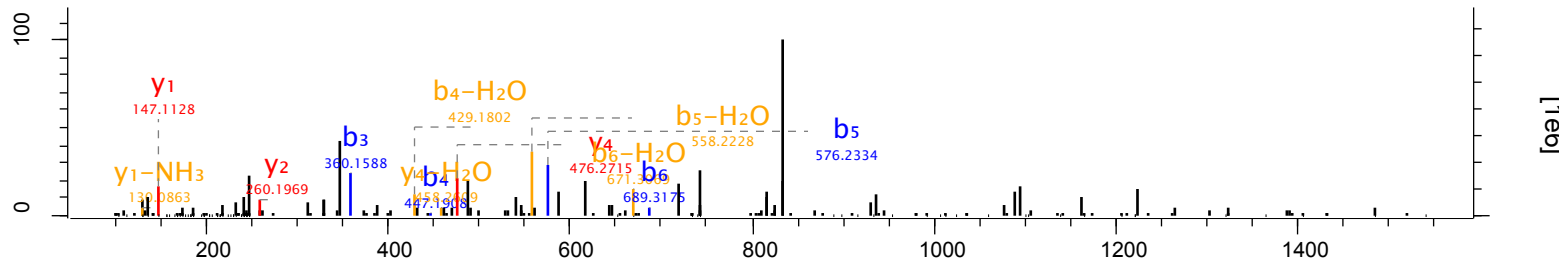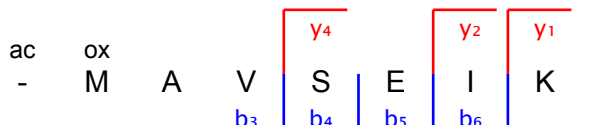

| Raw file                                   | Scan  | Method    | Score | m/z    | Gene names   |
|--------------------------------------------|-------|-----------|-------|--------|--------------|
| 20121216_EXQ1_AtDe_50CM_LFQ_myotubes_OG3_2 | 35298 | FTMS; HCD | 103.6 | 836.86 | mt-Nd3;Mtnd3 |

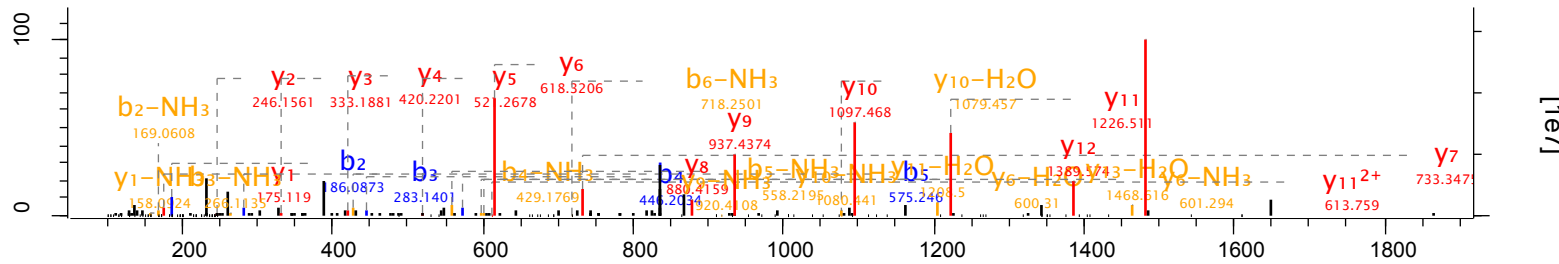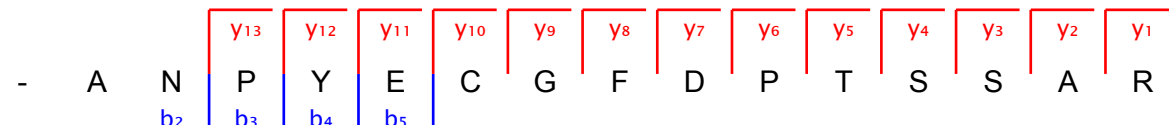

| Raw file                                   | Scan  | Method    | Score | m/z    | Gene names |
|--------------------------------------------|-------|-----------|-------|--------|------------|
| 20121216_EXQ1_AtDe_50CM_LFQ_myotubes_OG3_2 | 41096 | FTMS; HCD | 74.73 | 925.45 | Bcl7b      |

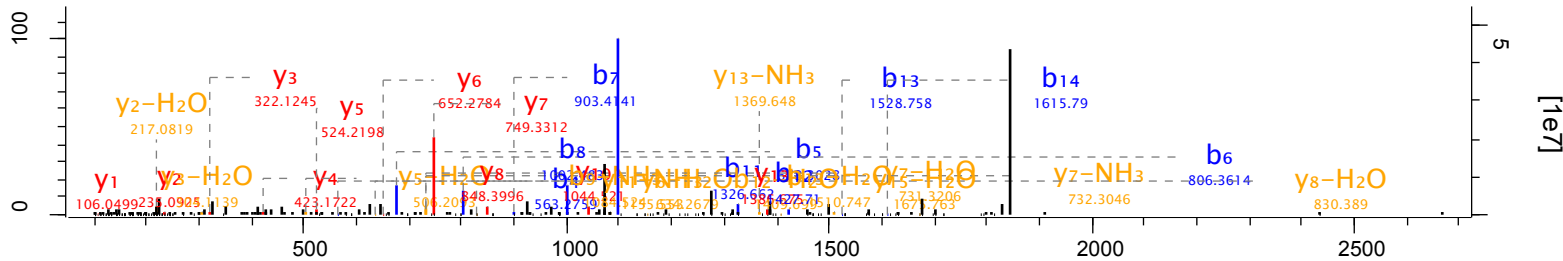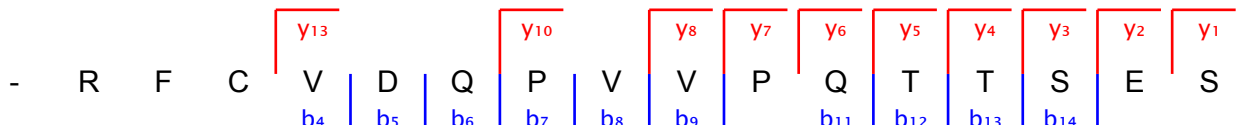

| Raw file                                   | Scan  | Method    | Score | m/z    | Gene names |
|--------------------------------------------|-------|-----------|-------|--------|------------|
| 20121216_EXQ1_AtDe_50CM_LFQ_myotubes_OG3_2 | 41946 | FTMS; HCD | 103.8 | 504.76 | Sept3      |

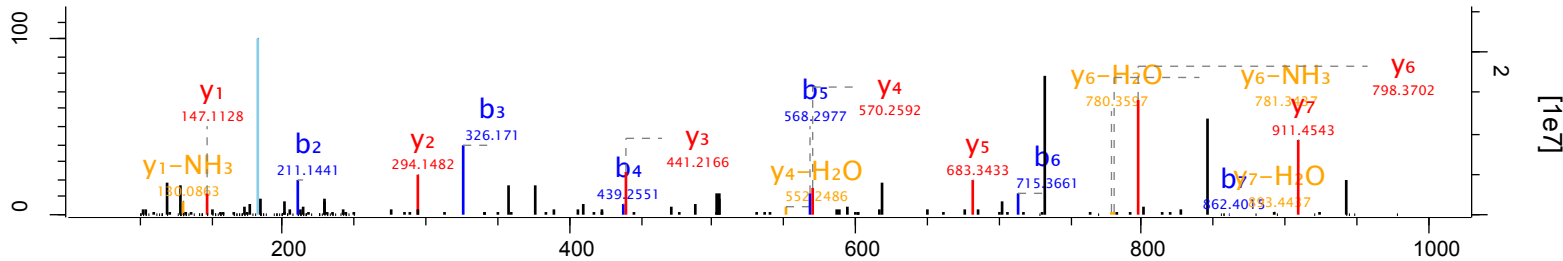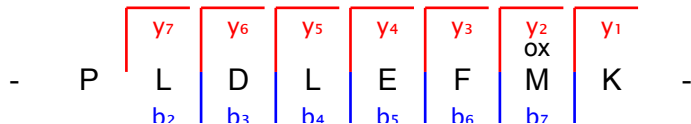

Raw file

Scan

Method

Score

m/z

20121216\_EXQ1\_AtDe\_50CM\_LFQ\_myotubes\_OG3\_2

45288

FTMS; HCD

70.89

715.4

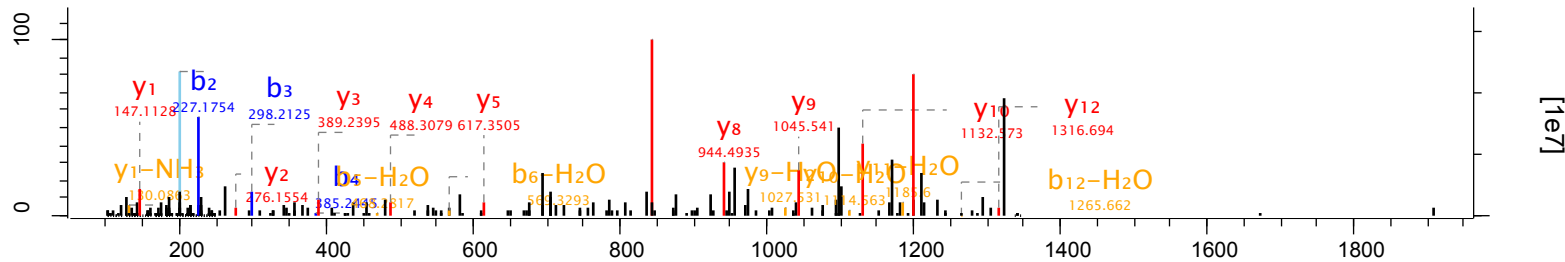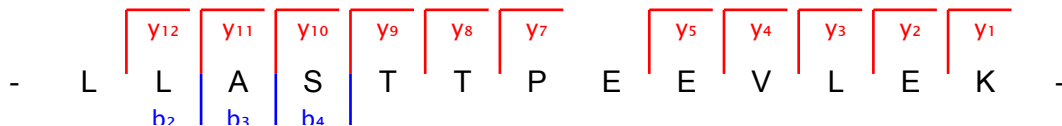



| Raw file                                   | Scan  | Method    | Score  | m/z   | Gene names |
|--------------------------------------------|-------|-----------|--------|-------|------------|
| 20121216_EXQ1_AtDe_50CM_LFQ_myotubes_OG3_2 | 46164 | FTMS; HCD | 114.89 | 635.8 | Gcsh       |

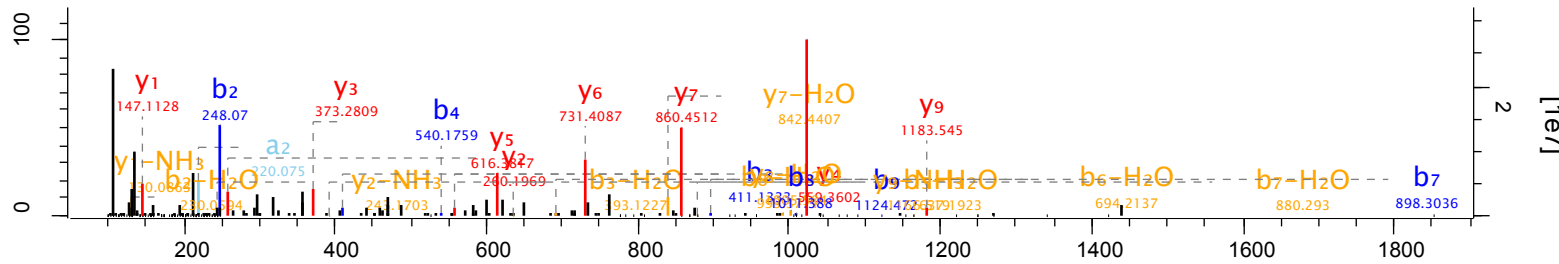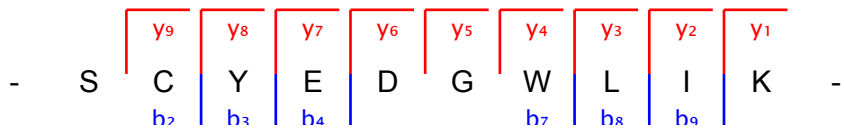

| Raw file                                   | Scan  | Method    | Score  | m/z     | Gene names |
|--------------------------------------------|-------|-----------|--------|---------|------------|
| 20121216_EXQ1_AtDe_50CM_LFQ_myotubes_OG3_2 | 50615 | FTMS; HCD | 182.87 | 1221.12 | Tmem42     |

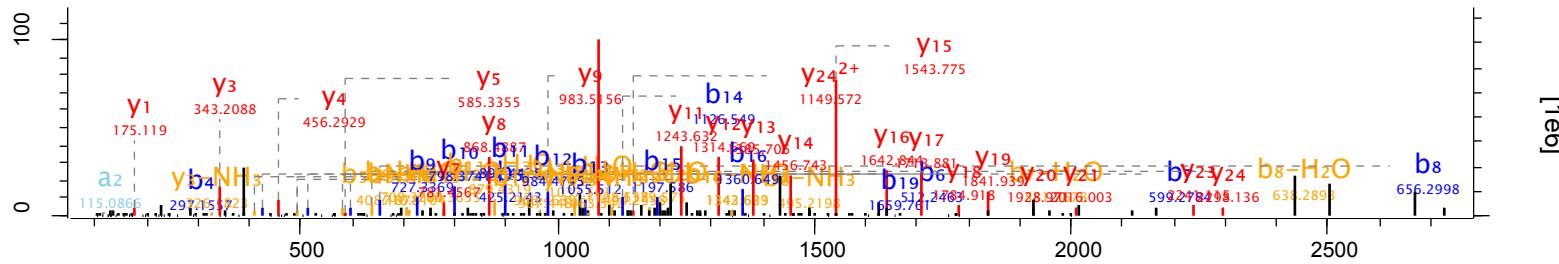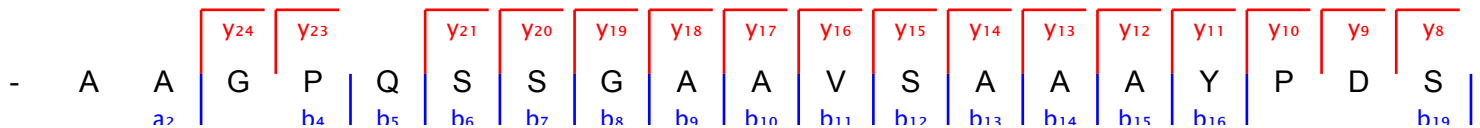

| Raw file                                   | Scan  | Method    | Score | m/z    | Gene names |
|--------------------------------------------|-------|-----------|-------|--------|------------|
| 20121216_EXQ1_AtDe_50CM_LFQ_myotubes_OG3_2 | 50921 | FTMS; HCD | 98    | 729.92 | Zcchc10    |

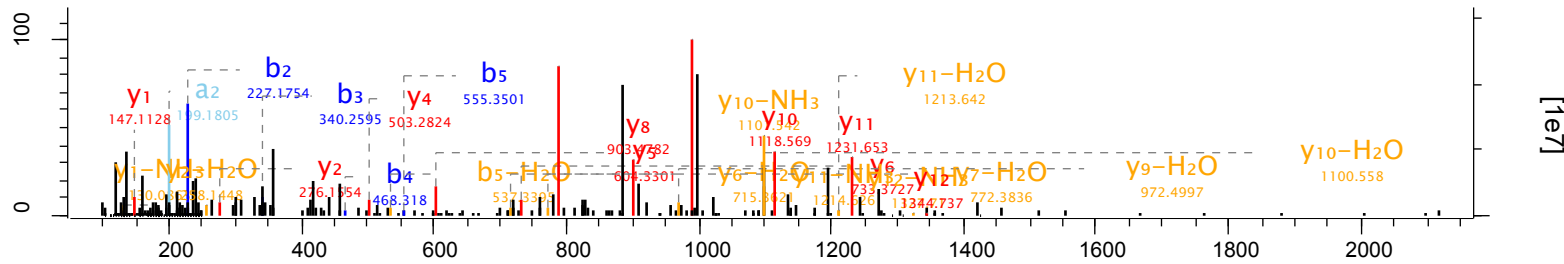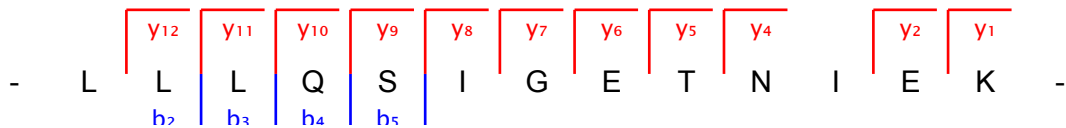

| Raw file                                   | Scan  | Method    | Score  | m/z    | Gene names |
|--------------------------------------------|-------|-----------|--------|--------|------------|
| 20121216_EXQ1_AtDe_50CM_LFQ_myotubes_OG3_2 | 53014 | FTMS; HCD | 109.71 | 496.76 | Sept3      |

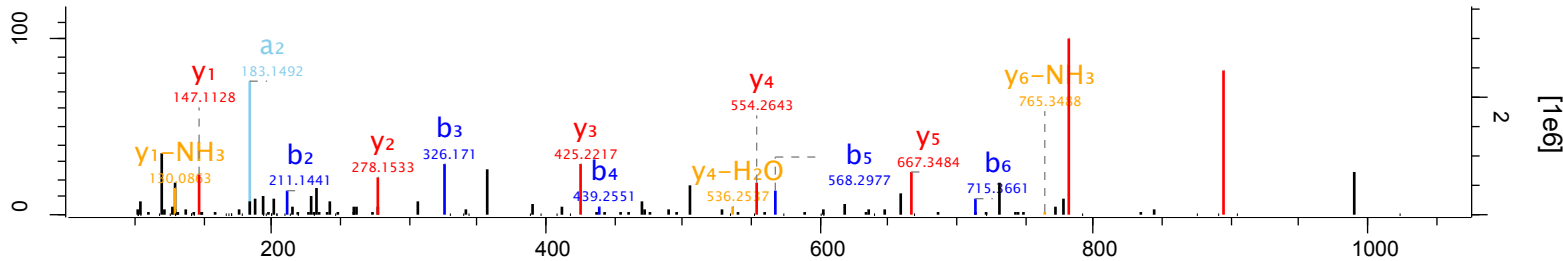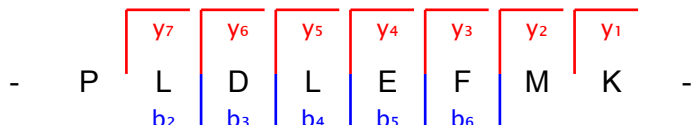

| Raw file                                   | Scan  | Method    | Score  | m/z    | Gene names |
|--------------------------------------------|-------|-----------|--------|--------|------------|
| 20121216_EXQ1_AtDe_50CM_LFQ_myotubes_OG3_2 | 53408 | FTMS; HCD | 146.81 | 496.76 | Sept3      |

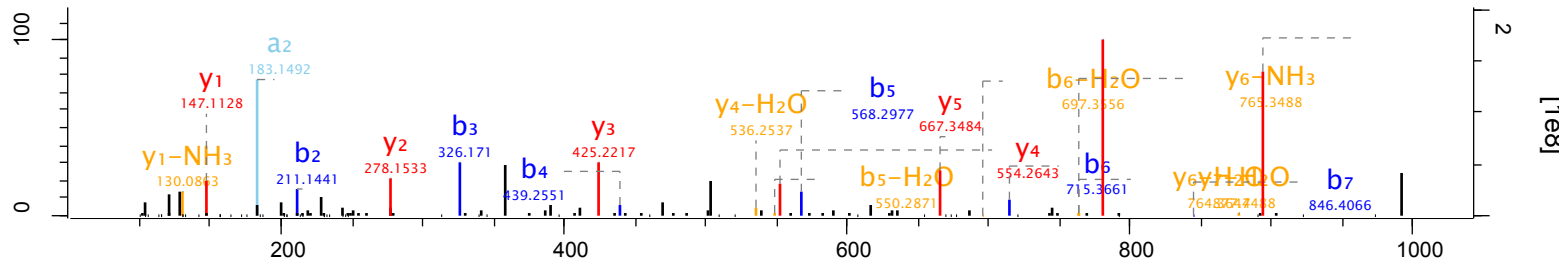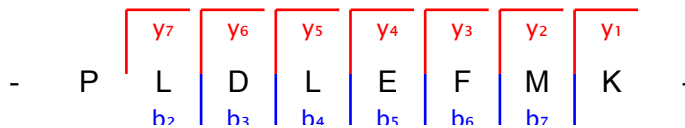

| Raw file                                   | Scan  | Method    | Score | m/z    | Gene names |
|--------------------------------------------|-------|-----------|-------|--------|------------|
| 20121216_EXQ1_AtDe_50CM_LFQ_myotubes_OG3_2 | 53854 | FTMS; HCD | 80.45 | 496.76 | Sept3      |

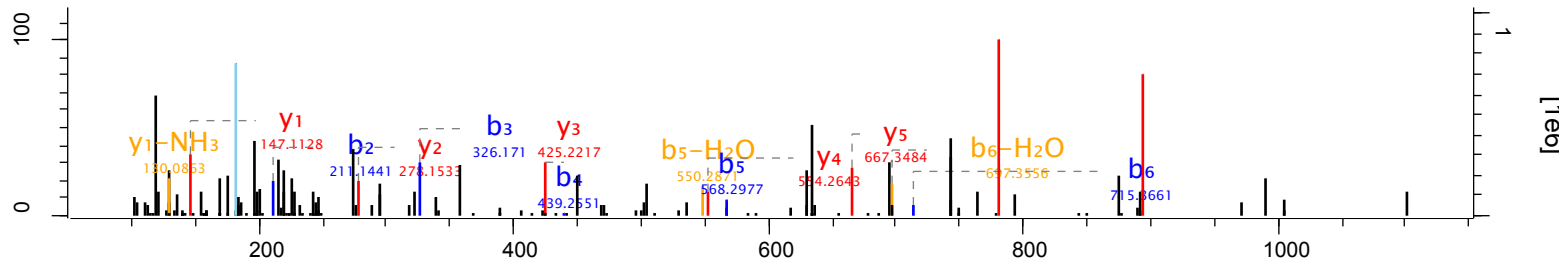

| Raw file                                   | Scan  | Method    | Score | m/z    | Gene names |
|--------------------------------------------|-------|-----------|-------|--------|------------|
| 20121216_EXQ1_AtDe_50CM_LFQ_myotubes_OG3_2 | 54497 | FTMS; HCD | 67.14 | 801.92 | Smoc1      |

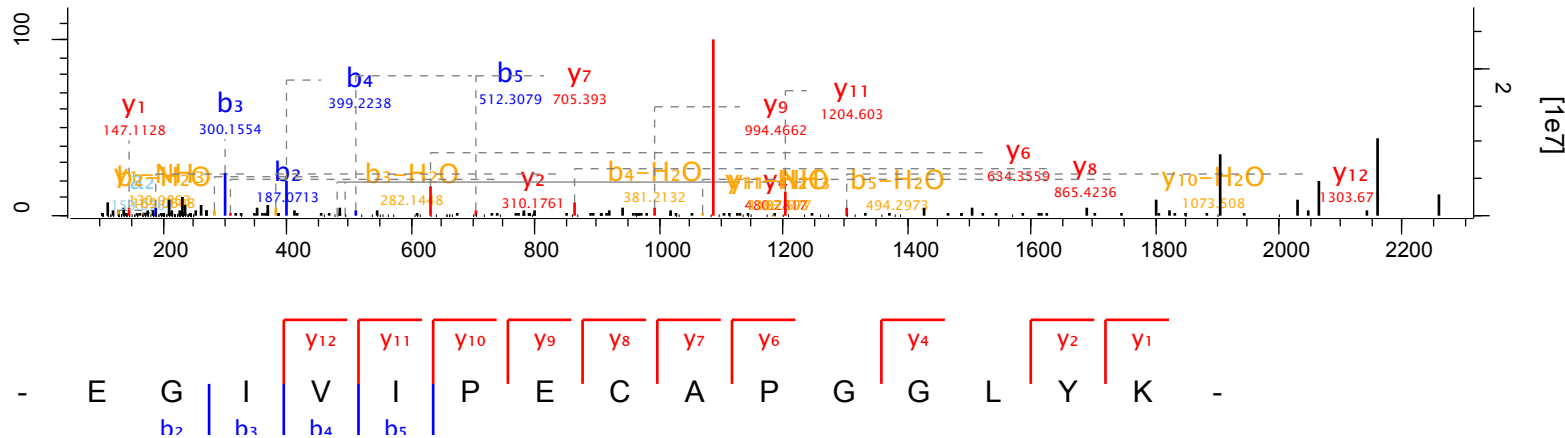

| Raw file                                   | Scan  | Method    | Score  | m/z    | Gene names |
|--------------------------------------------|-------|-----------|--------|--------|------------|
| 20121216_EXQ1_AtDe_50CM_LFQ_myotubes_OG3_2 | 55183 | FTMS; HCD | 139.11 | 721.36 | Cstf1      |

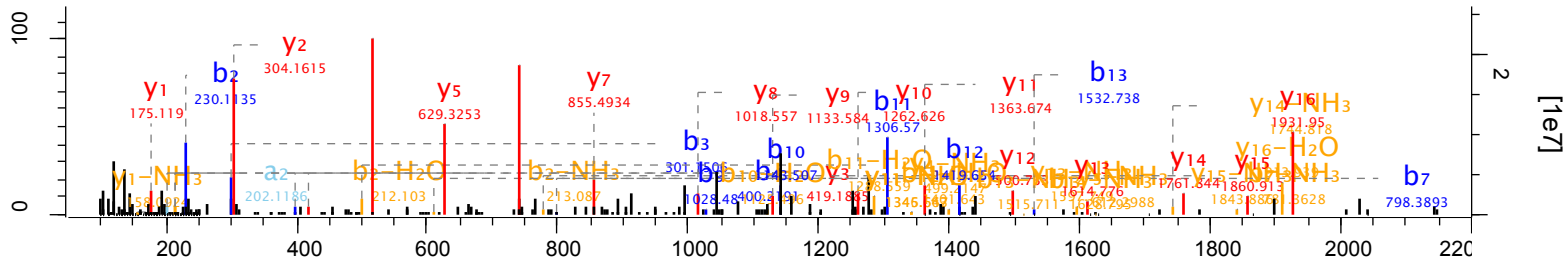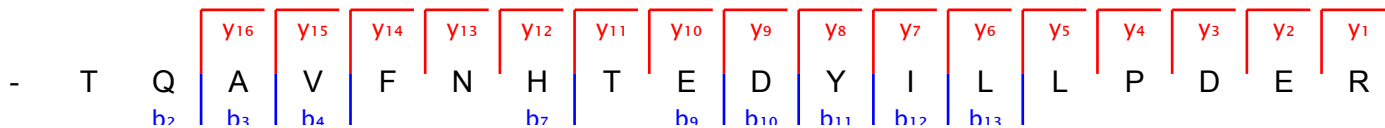





| Raw file                                   | Scan  | Method    | Score | m/z    | Gene names |
|--------------------------------------------|-------|-----------|-------|--------|------------|
| 20121216_EXQ1_AtDe_50CM_LFQ_myotubes_OG3_2 | 65731 | FTMS; HCD | 48.57 | 719.38 | Rnf2       |

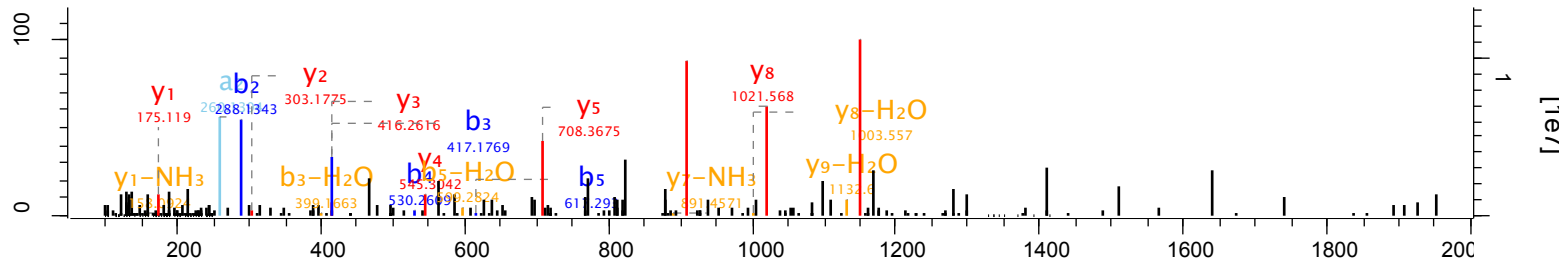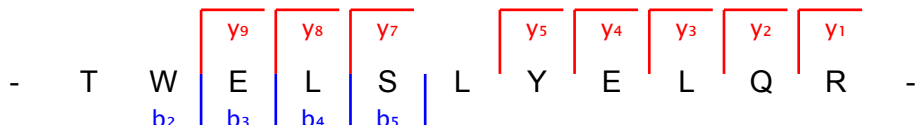

| Raw file                                   | Scan  | Method    | Score | m/z    | Gene names |
|--------------------------------------------|-------|-----------|-------|--------|------------|
| 20121216_EXQ1_AtDe_50CM_LFQ_myotubes_OG3_2 | 68714 | FTMS; HCD | 93.61 | 732.41 | MIIt11     |

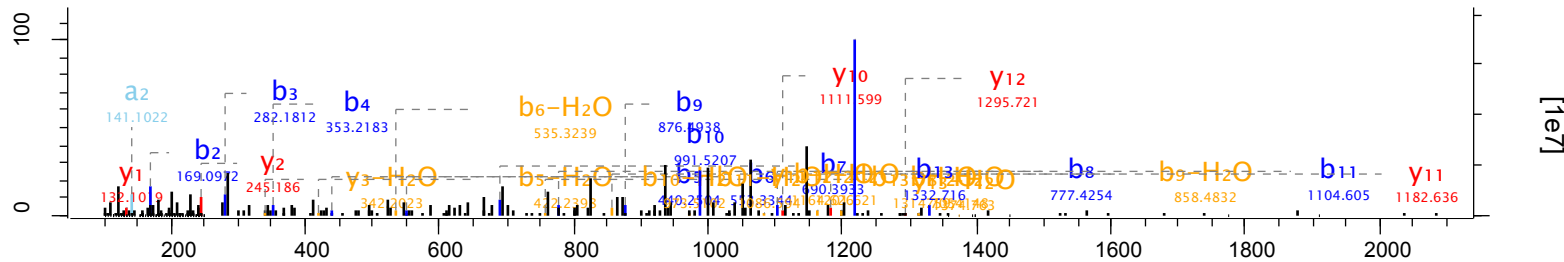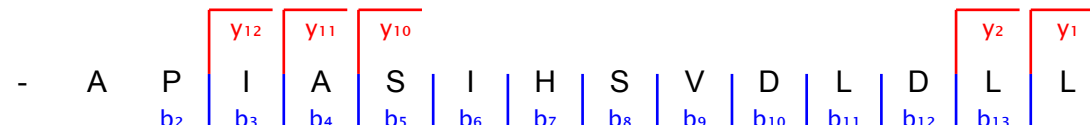

| Raw file                                   | Scan  | Method    | Score  | m/z    | Gene names |
|--------------------------------------------|-------|-----------|--------|--------|------------|
| 20121216_EXQ1_AtDe_50CM_LFQ_myotubes_OG3_2 | 69401 | FTMS; HCD | 149.14 | 871.94 | Mrpl52     |

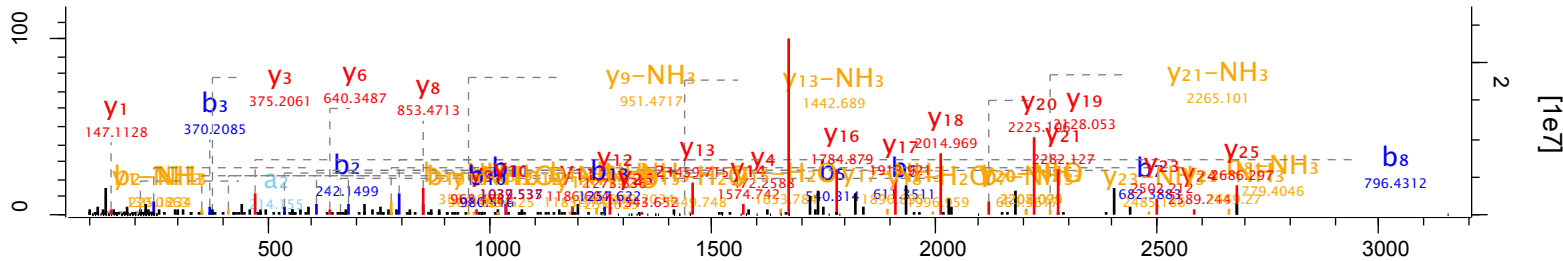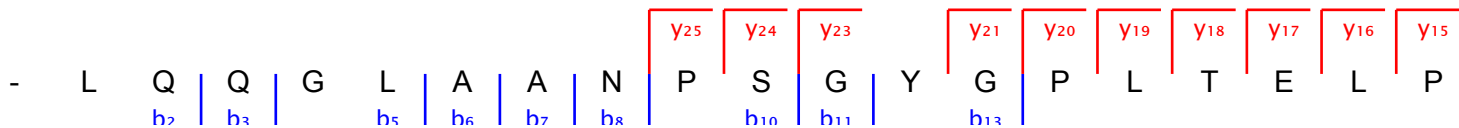

| Raw file                                   | Scan  | Method    | Score  | m/z     | Gene names |
|--------------------------------------------|-------|-----------|--------|---------|------------|
| 20121216_EXQ1_AtDe_50CM_LFQ_myotubes_OG3_2 | 69415 | FTMS; HCD | 194.24 | 1161.92 | Mrpl52     |

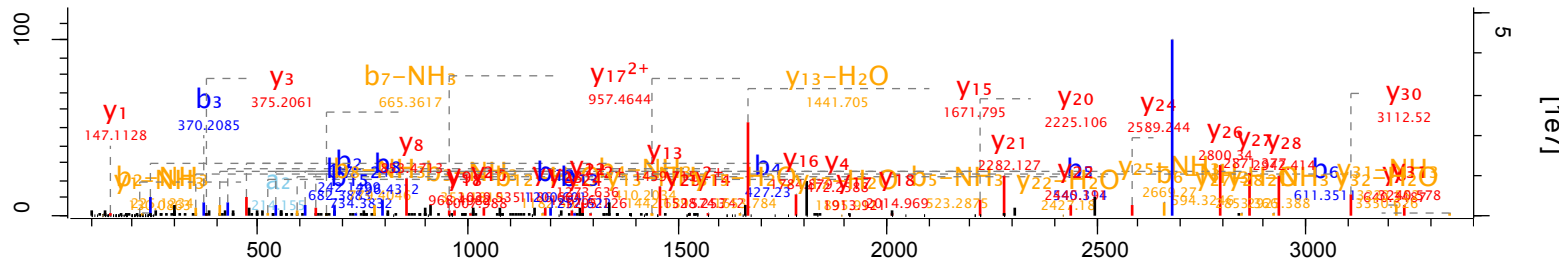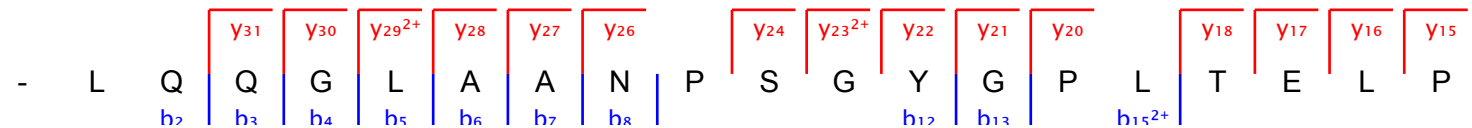

| Raw file                                   | Scan  | Method    | Score  | m/z    | Gene names |
|--------------------------------------------|-------|-----------|--------|--------|------------|
| 20121216_EXQ1_AtDe_50CM_LFQ_myotubes_OG3_2 | 70885 | FTMS; HCD | 192.24 | 698.39 | Scoc       |

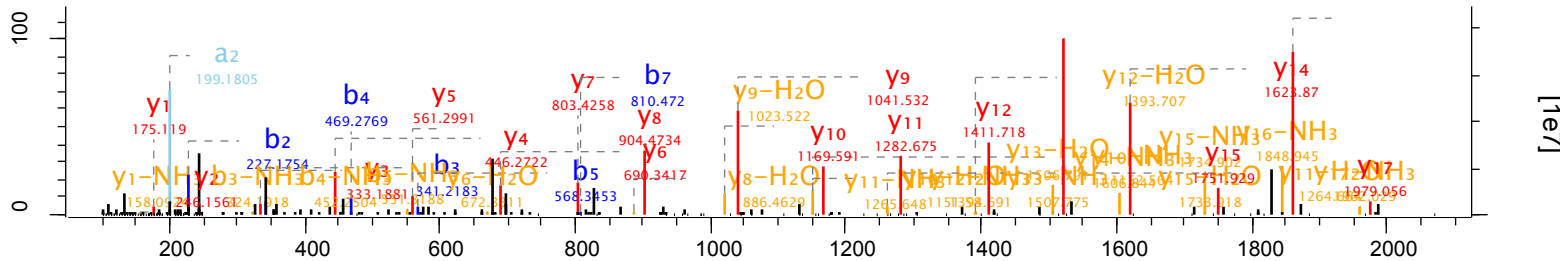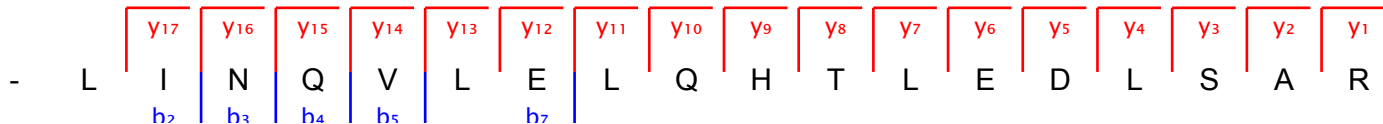

| Raw file                                   | Scan  | Method    | Score  | m/z    | Gene names |
|--------------------------------------------|-------|-----------|--------|--------|------------|
| 20121216_EXQ1_AtDe_50CM_LFQ_myotubes_OG3_2 | 72333 | FTMS; HCD | 132.77 | 790.14 | Hspa14     |

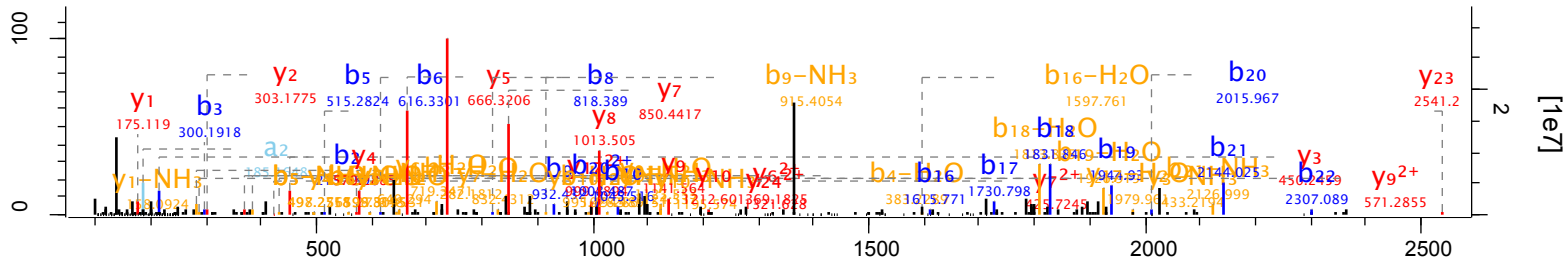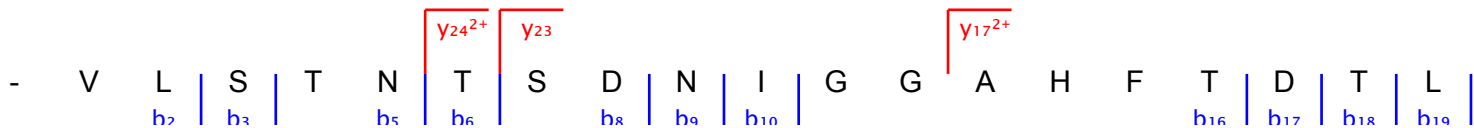

| Raw file                                   | Scan  | Method    | Score  | m/z    | Gene names |
|--------------------------------------------|-------|-----------|--------|--------|------------|
| 20121216_EXQ1_AtDe_50CM_LFQ_myotubes_OG3_2 | 72589 | FTMS; HCD | 104.42 | 1207.6 | Ly6a       |

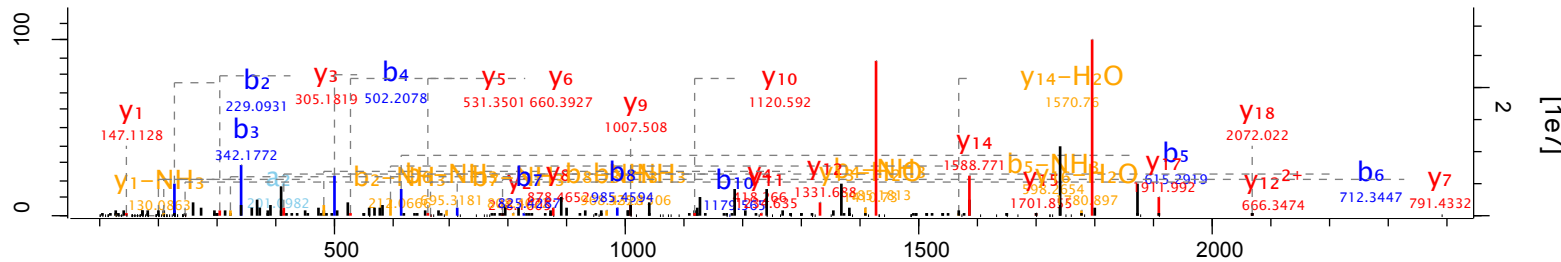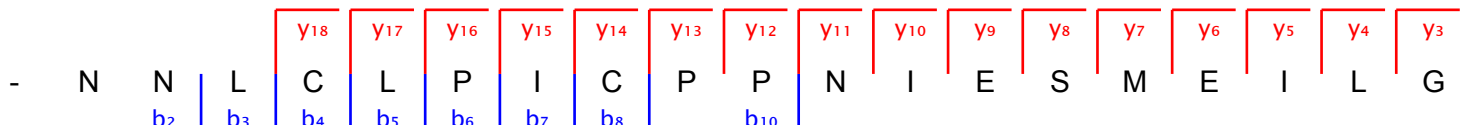



| Raw file                                   | Scan  | Method    | Score  | m/z    | Gene names |
|--------------------------------------------|-------|-----------|--------|--------|------------|
| 20121216_EXQ1_AtDe_50CM_LFQ_myotubes_OG3_2 | 72631 | FTMS; HCD | 155.49 | 805.41 | Ly6a       |

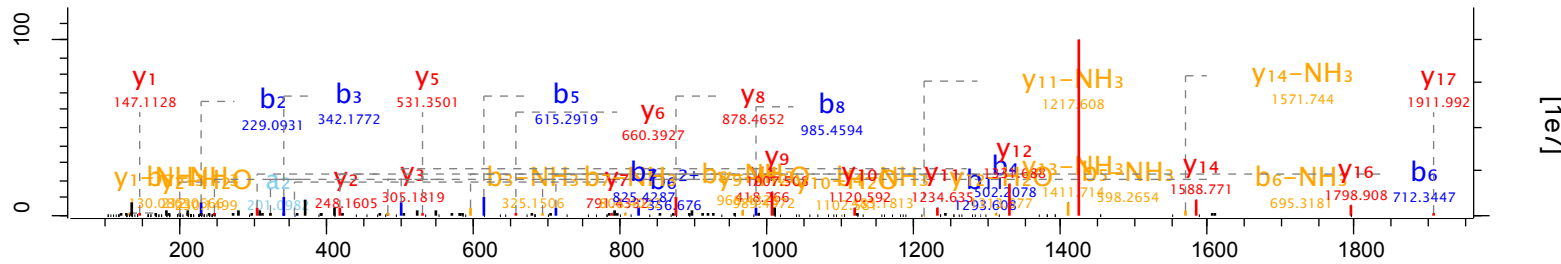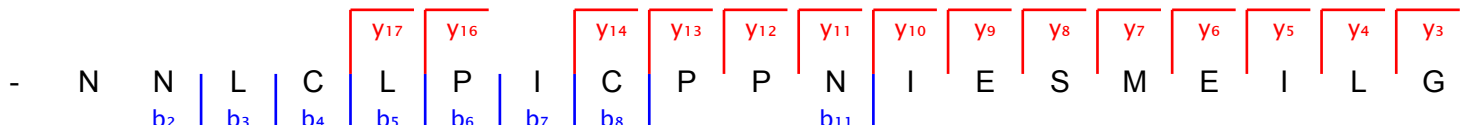

| Raw file                                   | Scan  | Method    | Score  | m/z    | Gene names |
|--------------------------------------------|-------|-----------|--------|--------|------------|
| 20121216_EXQ1_AtDe_50CM_LFQ_myotubes_OG3_3 | 17406 | FTMS; HCD | 117.13 | 589.95 | Tmeff1     |

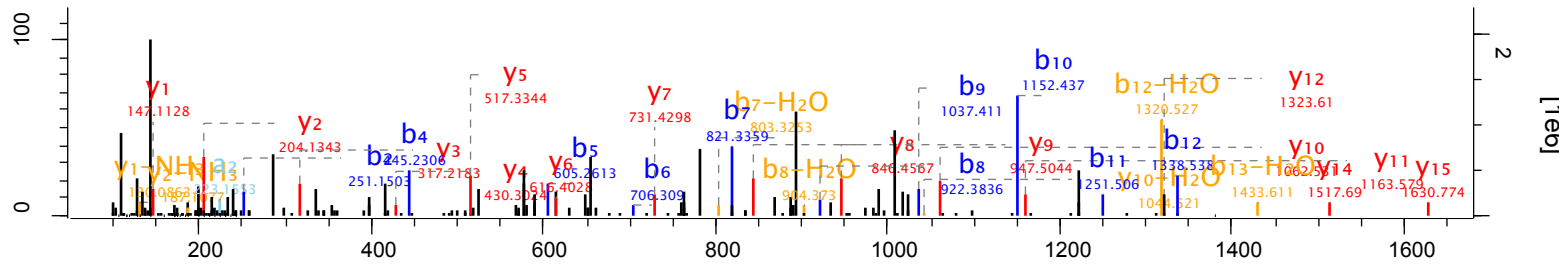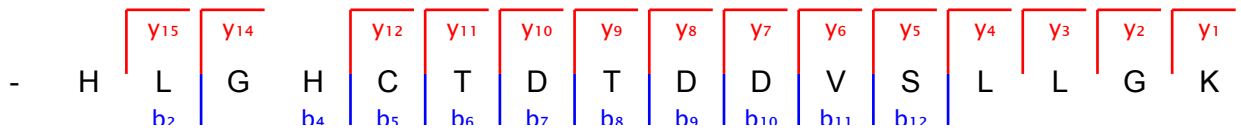

| Raw file                                   | Scan  | Method    | Score | m/z    | Gene names |
|--------------------------------------------|-------|-----------|-------|--------|------------|
| 20121216_EXQ1_AtDe_50CM_LFQ_myotubes_OG3_3 | 21091 | FTMS; HCD | 58.08 | 834.36 | Rnf145     |

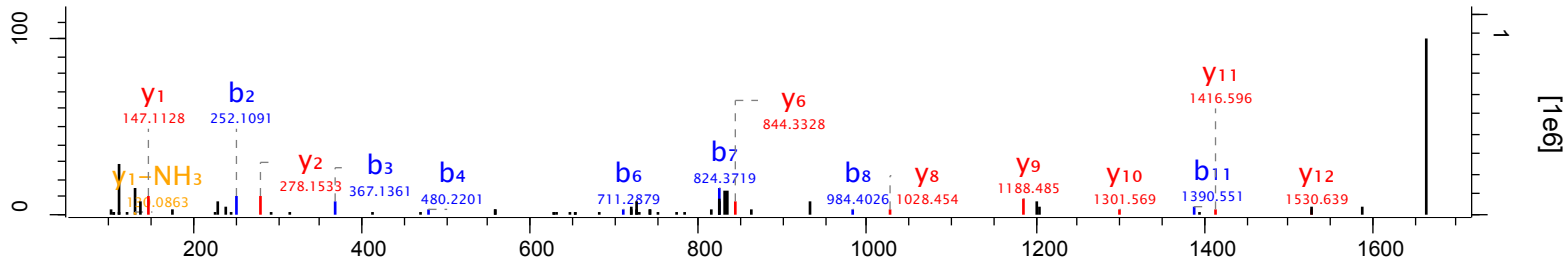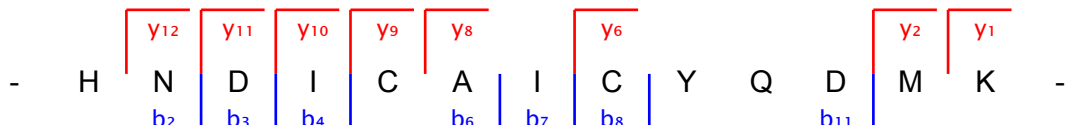

| Raw file                                   | Scan  | Method    | Score | m/z    | Gene names |
|--------------------------------------------|-------|-----------|-------|--------|------------|
| 20121216_EXQ1_AtDe_50CM_LFQ_myotubes_OG3_3 | 22999 | FTMS; HCD | 76.34 | 543.61 | Tctex1d2   |

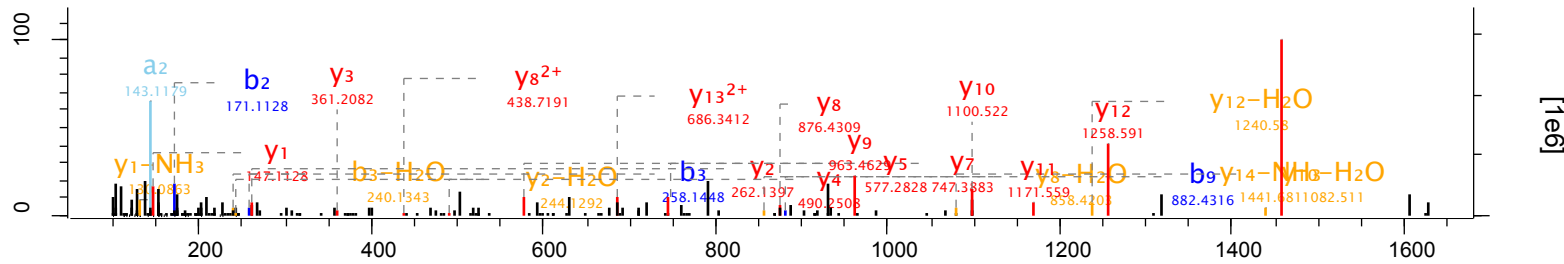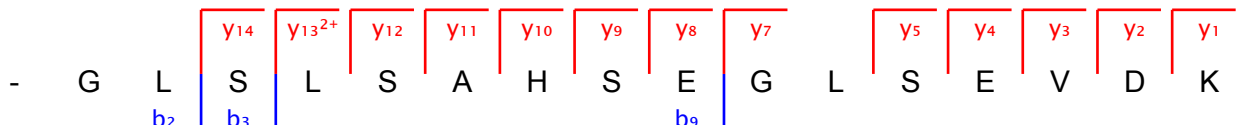

| Raw file                                   | Scan  | Method    | Score | m/z    | Gene names |
|--------------------------------------------|-------|-----------|-------|--------|------------|
| 20121216_EXQ1_AtDe_50CM_LFQ_myotubes_OG3_3 | 25156 | FTMS; HCD | 64.7  | 817.13 | Rpain      |

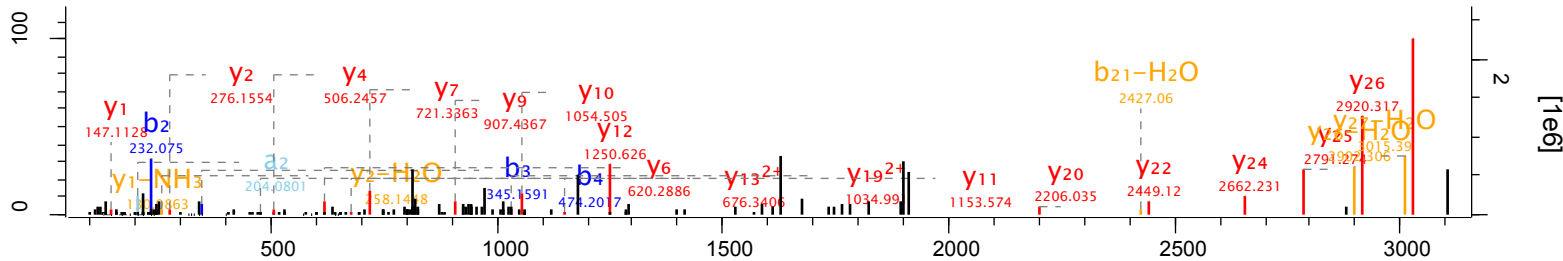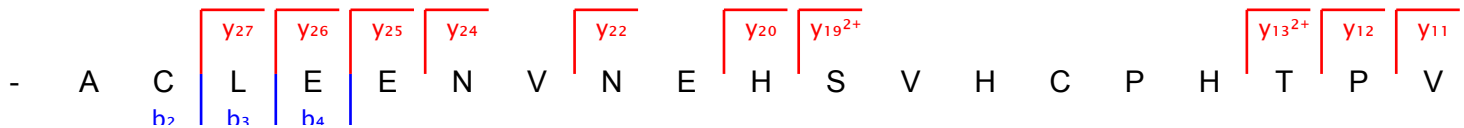

| Raw file                                   | Scan  | Method    | Score  | m/z    | Gene names |
|--------------------------------------------|-------|-----------|--------|--------|------------|
| 20121216_EXQ1_AtDe_50CM_LFQ_myotubes_OG3_3 | 25583 | FTMS; HCD | 132.76 | 803.03 | Znf260     |

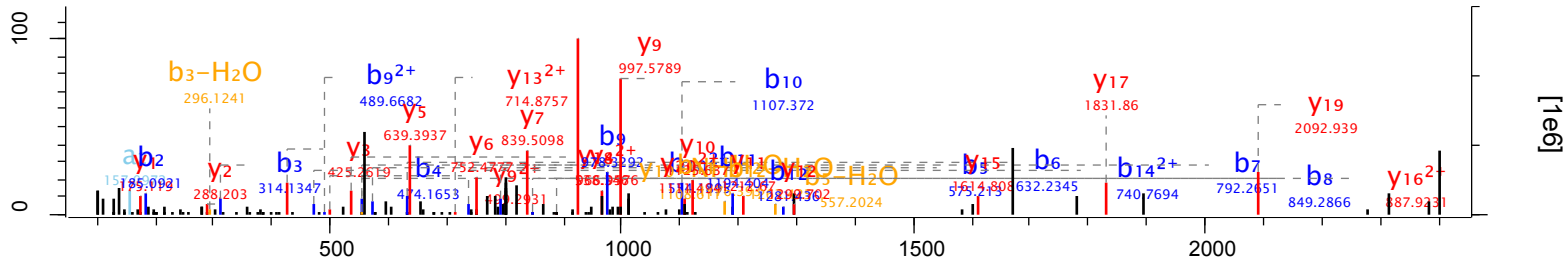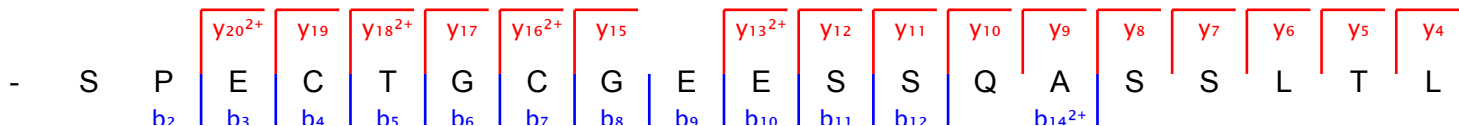

| Raw file                                   | Scan  | Method    | Score | m/z    | Gene names |
|--------------------------------------------|-------|-----------|-------|--------|------------|
| 20121216_EXQ1_AtDe_50CM_LFQ_myotubes_OG3_3 | 27567 | FTMS; HCD | 60.31 | 605.98 | Shisa5     |

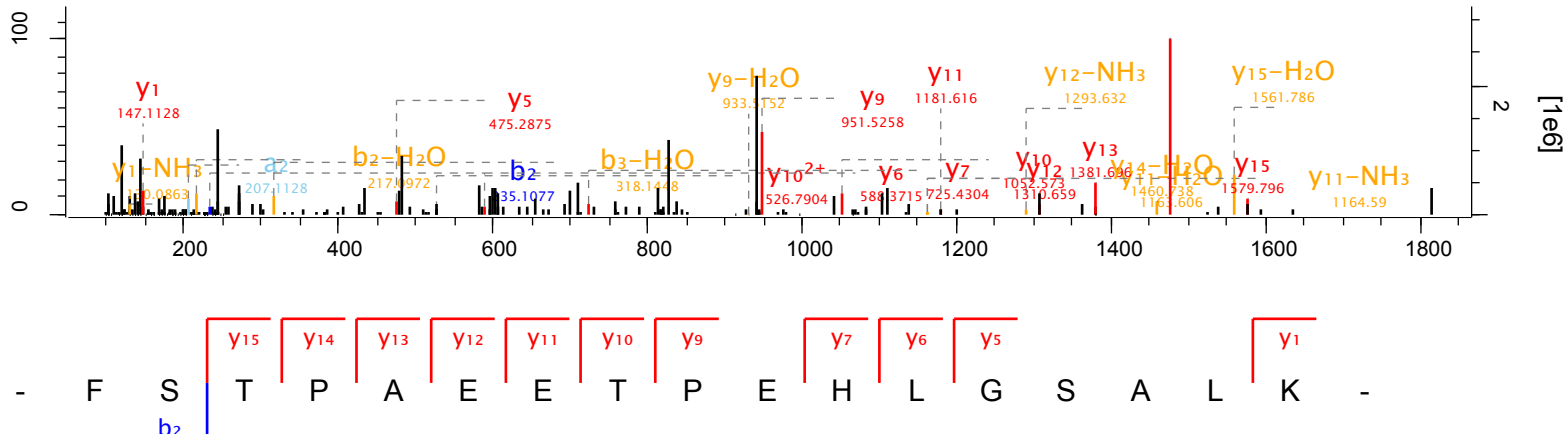

| Raw file                                   | Scan  | Method    | Score | m/z    | Gene names |
|--------------------------------------------|-------|-----------|-------|--------|------------|
| 20121216_EXQ1_AtDe_50CM_LFQ_myotubes_OG3_3 | 27570 | FTMS; HCD | 39.59 | 907.96 | Shisa5     |

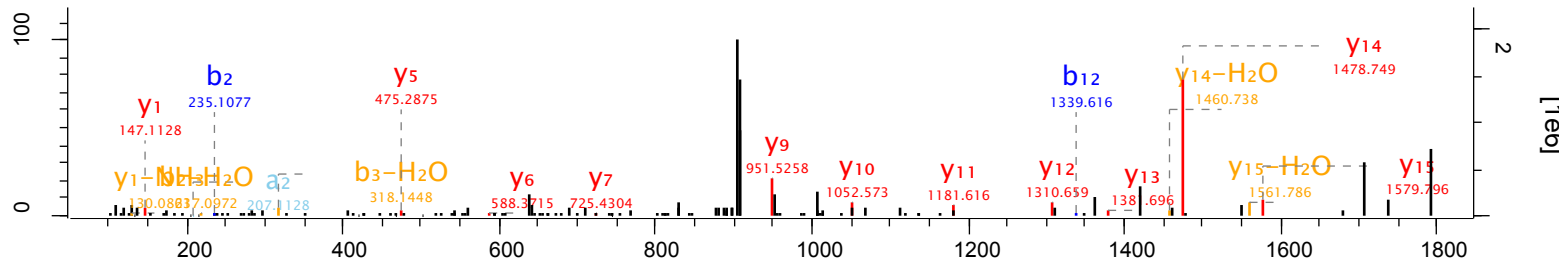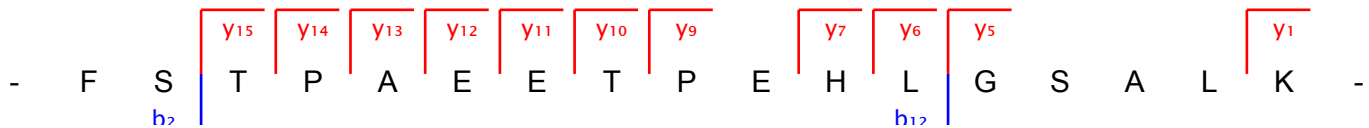



| Raw file                                   | Scan  | Method    | Score | m/z     | Gene names |
|--------------------------------------------|-------|-----------|-------|---------|------------|
| 20121216_EXQ1_AtDe_50CM_LFQ_myotubes_OG3_3 | 30744 | FTMS; HCD | 74.81 | 1097.21 | Abhd17c    |

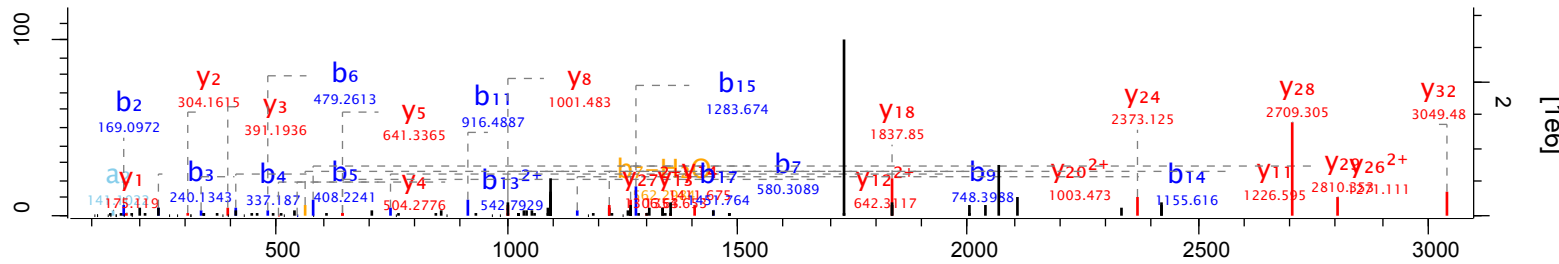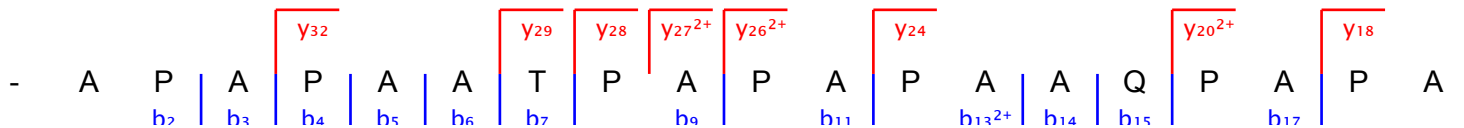

Raw file

20121216\_EXQ1\_AtDe\_50CM\_LFQ\_myotubes\_OG3\_3

Scan

34574

Method

FTMS; HCD

Score

69.82

m/z

482.79

Gene names

Plch1

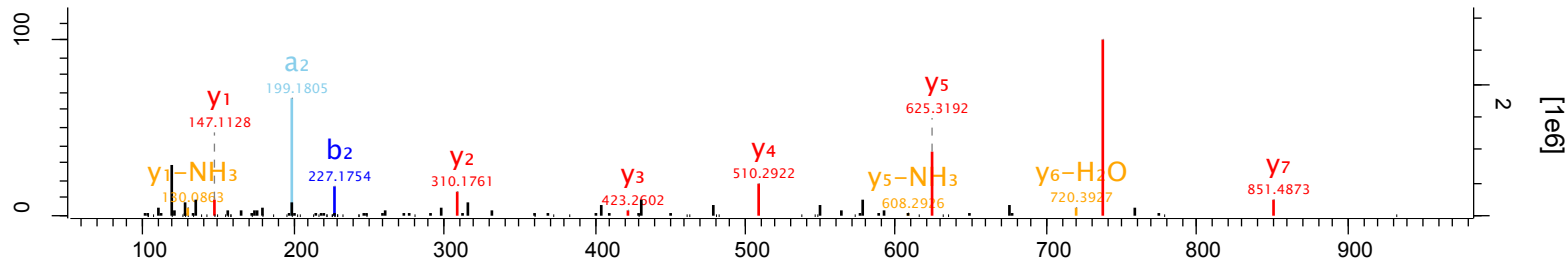

| Raw file                                   | Scan  | Method    | Score | m/z    | Gene names |
|--------------------------------------------|-------|-----------|-------|--------|------------|
| 20121216_EXQ1_AtDe_50CM_LFQ_myotubes_OG3_3 | 34895 | FTMS; HCD | 84.41 | 665.65 | Fktn       |

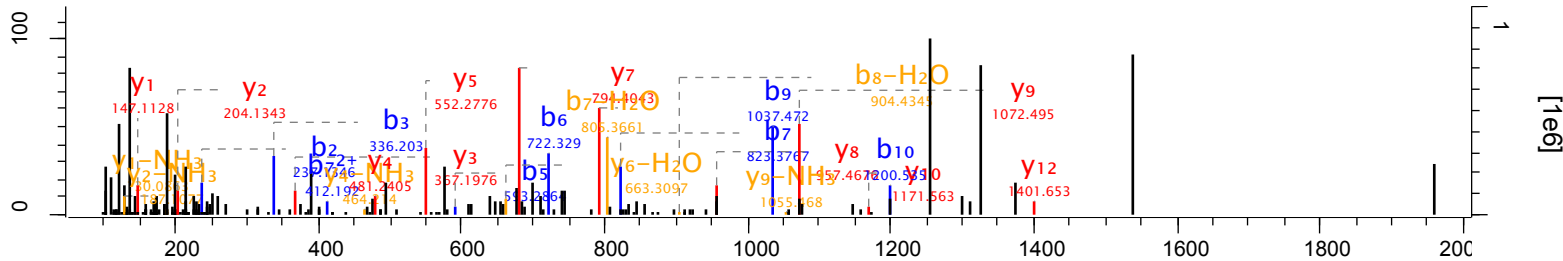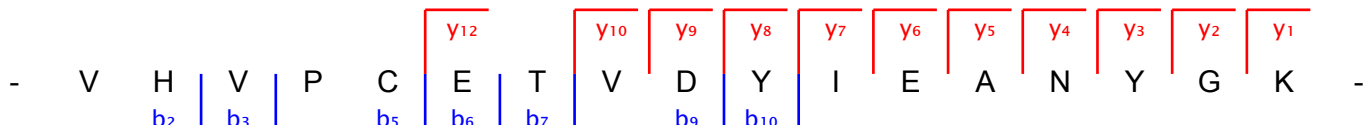

| Raw file                                   | Scan  | Method    | Score | m/z    | Gene names |
|--------------------------------------------|-------|-----------|-------|--------|------------|
| 20121216_EXQ1_AtDe_50CM_LFQ_myotubes_OG3_3 | 35056 | FTMS; HCD | 56.91 | 997.98 | Fktn       |

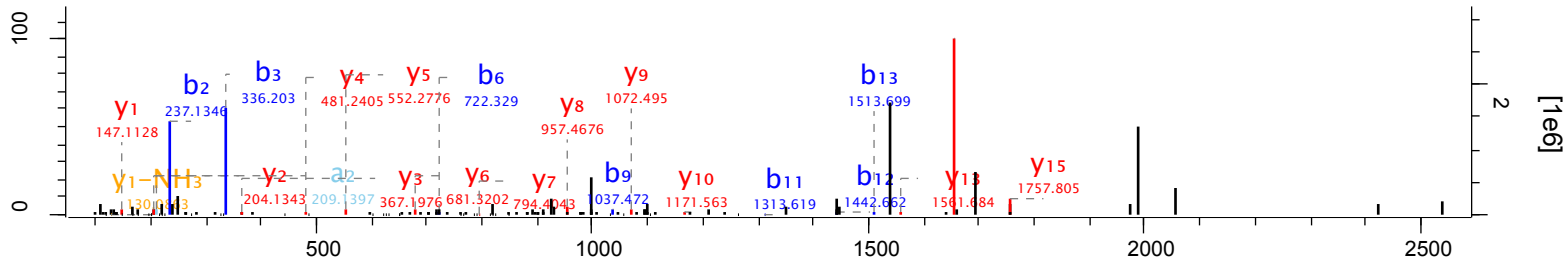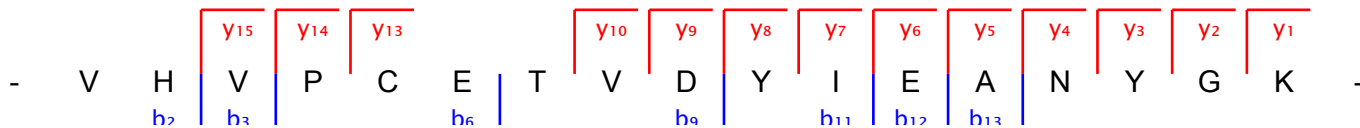



| Raw file                                   | Scan  | Method    | Score  | m/z    | Gene names |
|--------------------------------------------|-------|-----------|--------|--------|------------|
| 20121216_EXQ1_AtDe_50CM_LFQ_myotubes_OG3_3 | 50698 | FTMS; HCD | 113.51 | 803.06 | Scamp5     |

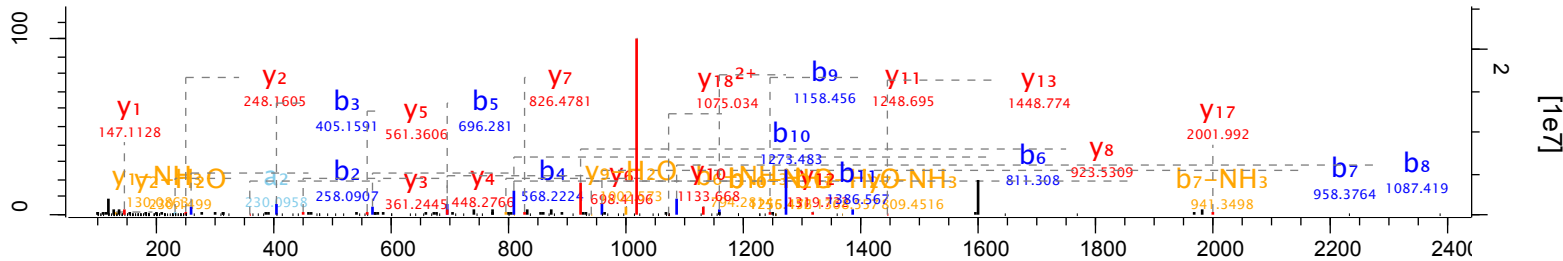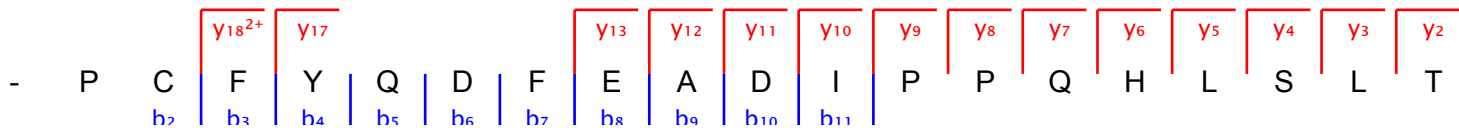

| Raw file                                   | Scan  | Method    | Score | m/z    | Gene names |
|--------------------------------------------|-------|-----------|-------|--------|------------|
| 20121216_EXQ1_AtDe_50CM_LFQ_myotubes_OG3_3 | 57422 | FTMS; HCD | 96.85 | 707.03 | Snapc2     |

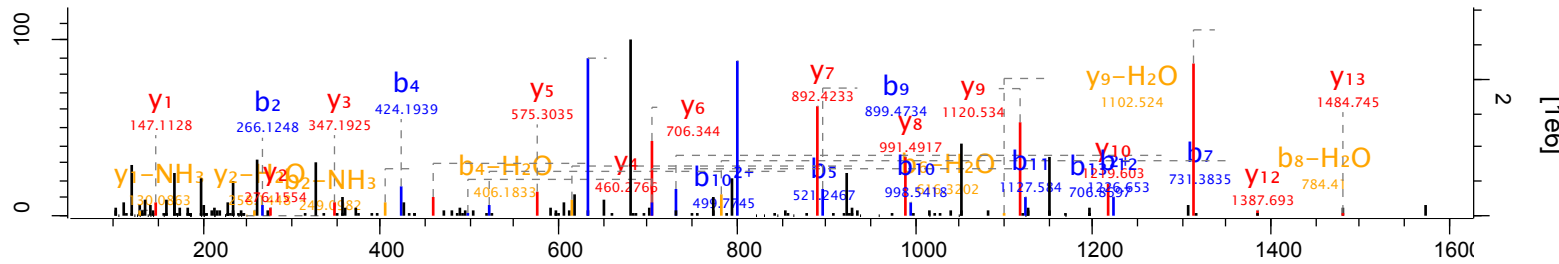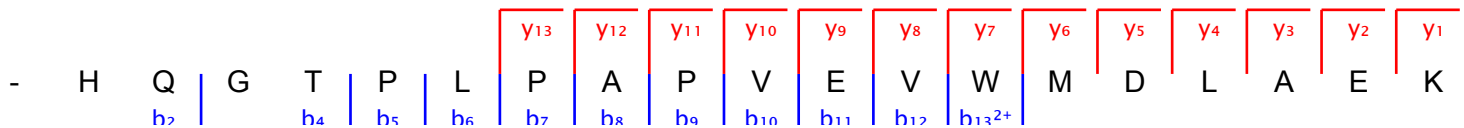

| Raw file                                   | Scan  | Method    | Score  | m/z    | Gene names |
|--------------------------------------------|-------|-----------|--------|--------|------------|
| 20121216_EXQ1_AtDe_50CM_LFQ_myotubes_OG3_3 | 57953 | FTMS; HCD | 144.15 | 814.95 | Fastkd3    |

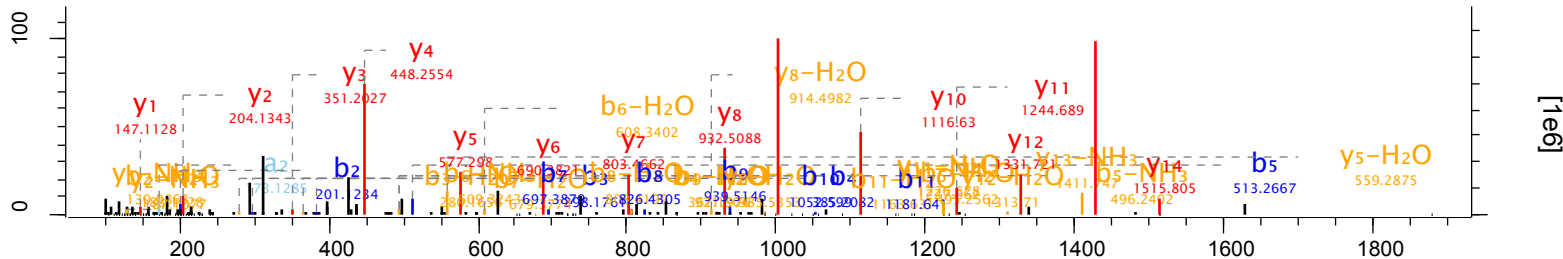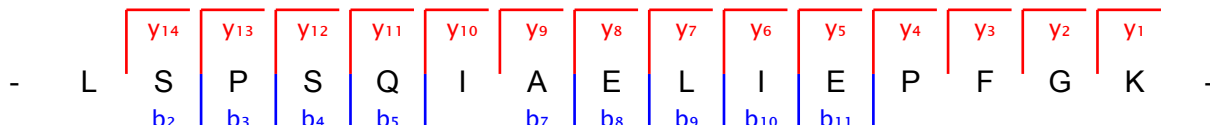



| Raw file                                   | Scan  | Method    | Score | m/z | Gene names |
|--------------------------------------------|-------|-----------|-------|-----|------------|
| 20121216_EXQ1_AtDe_50CM_LFQ_myotubes_OG3_3 | 59064 | FTMS; HCD | 90.73 | 853 | Gemin7     |

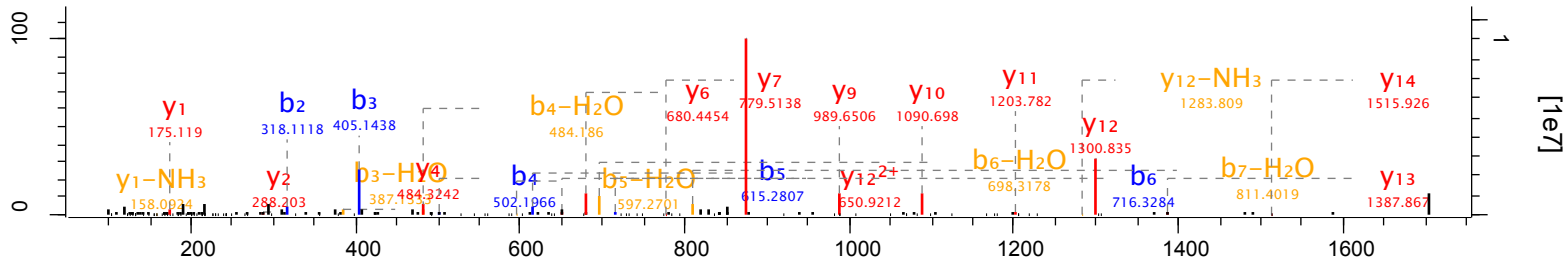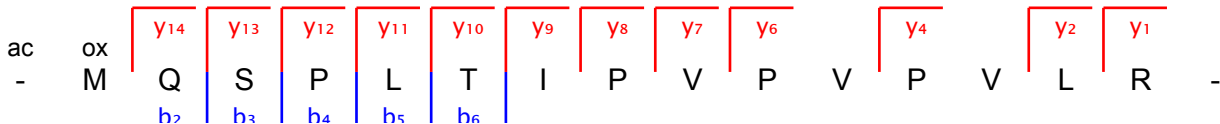

| Raw file                                   | Scan  | Method    | Score  | m/z    | Gene names |
|--------------------------------------------|-------|-----------|--------|--------|------------|
| 20121216_EXQ1_AtDe_50CM_LFQ_myotubes_OG3_4 | 14073 | FTMS; HCD | 124.09 | 627.47 | Hspg2      |

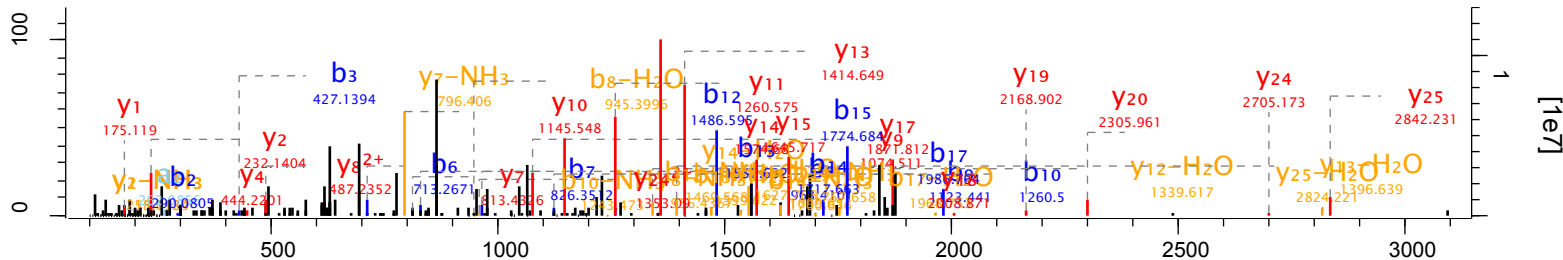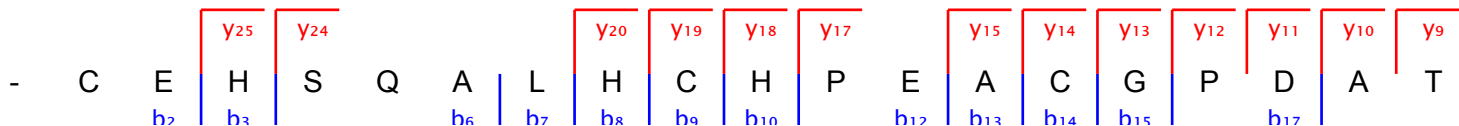

| Raw file                                   | Scan  | Method    | Score  | m/z    | Gene names |
|--------------------------------------------|-------|-----------|--------|--------|------------|
| 20121216_EXQ1_AtDe_50CM_LFQ_myotubes_OG3_4 | 17966 | FTMS; HCD | 227.63 | 725.83 | Smim1      |

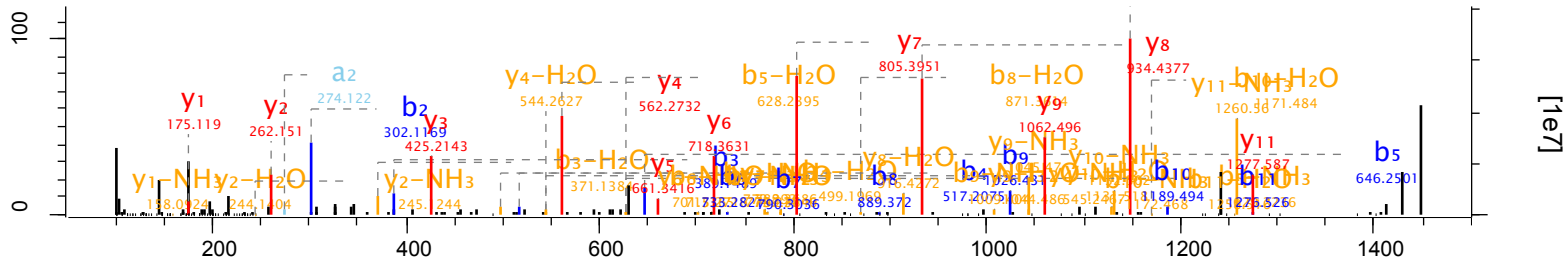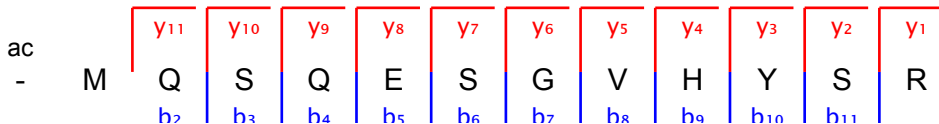

| Raw file                                   | Scan  | Method    | Score | m/z    | Gene names |
|--------------------------------------------|-------|-----------|-------|--------|------------|
| 20121216_EXQ1_AtDe_50CM_LFQ_myotubes_OG3_4 | 26017 | FTMS; HCD | 92.27 | 813.39 | Dnlz       |

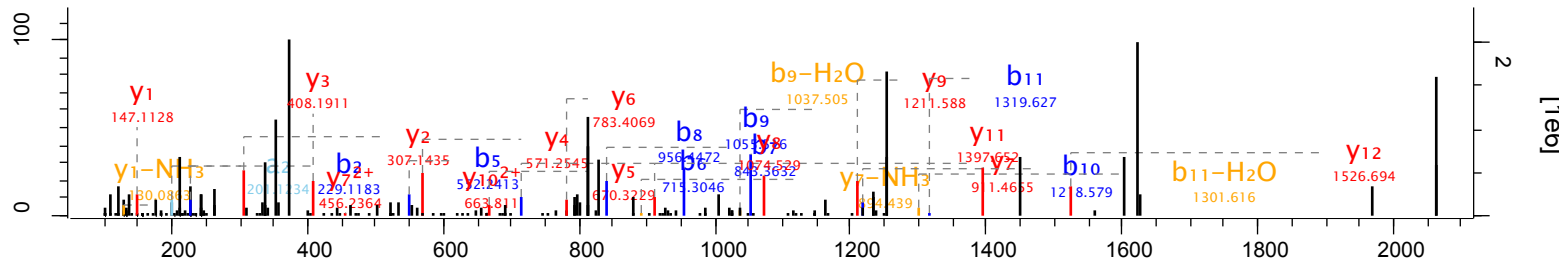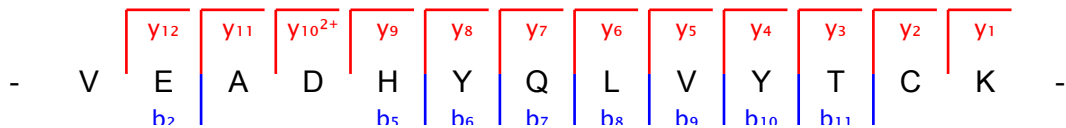

| Raw file                                   | Scan  | Method    | Score  | m/z    | Gene names |
|--------------------------------------------|-------|-----------|--------|--------|------------|
| 20121216_EXQ1_AtDe_50CM_LFQ_myotubes_OG3_4 | 26939 | FTMS; HCD | 163.68 | 721.03 | Sdc3       |

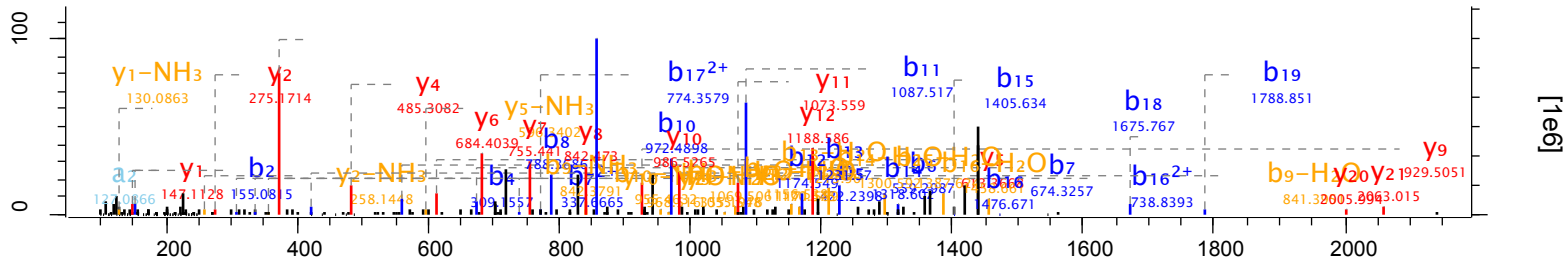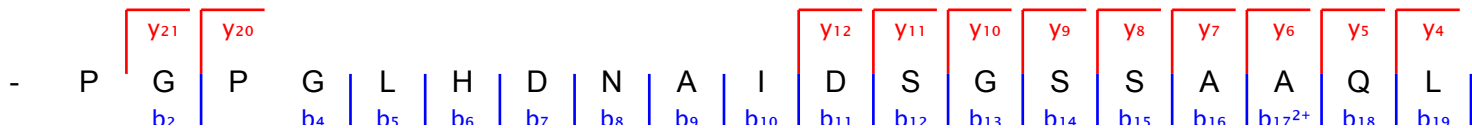

| Raw file                                   | Scan  | Method    | Score  | m/z    | Gene names |
|--------------------------------------------|-------|-----------|--------|--------|------------|
| 20121216_EXQ1_AtDe_50CM_LFQ_myotubes_OG3_4 | 29298 | FTMS; HCD | 133.48 | 705.33 | Vkorc1     |

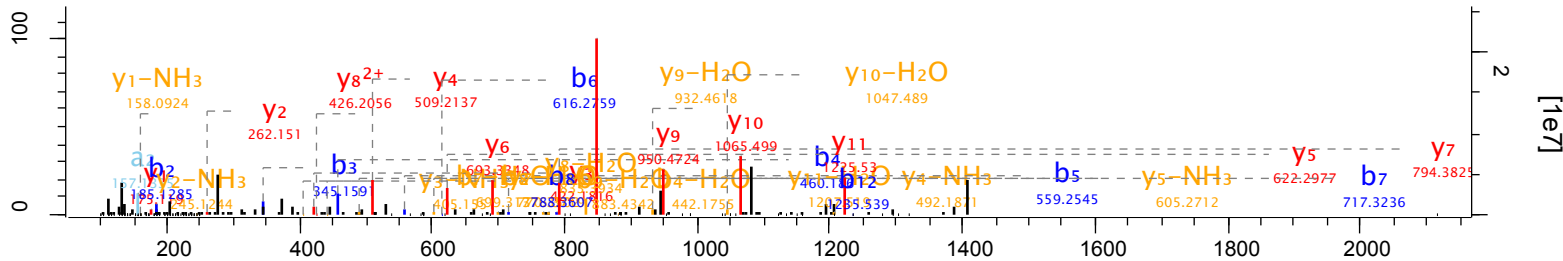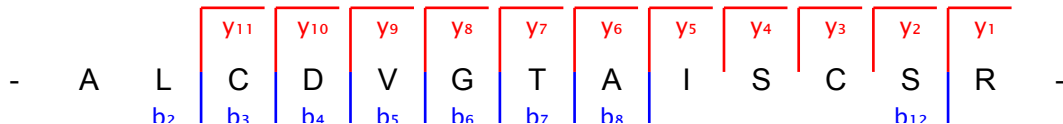

| Raw file                                   | Scan  | Method    | Score  | m/z    | Gene names |
|--------------------------------------------|-------|-----------|--------|--------|------------|
| 20121216_EXQ1_AtDe_50CM_LFQ_myotubes_OG3_4 | 29396 | FTMS; HCD | 137.95 | 470.56 | Vkorc1     |

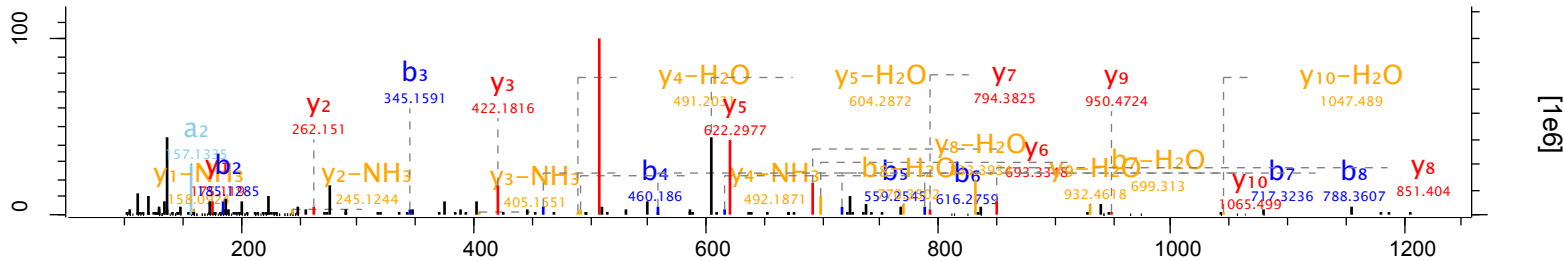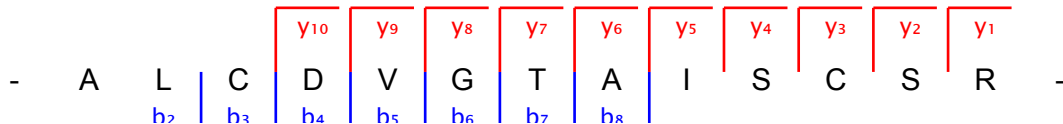

| Raw file                                   | Scan  | Method    | Score | m/z    | Gene names |
|--------------------------------------------|-------|-----------|-------|--------|------------|
| 20121216_EXQ1_AtDe_50CM_LFQ_myotubes_OG3_4 | 31282 | FTMS; HCD | 79.81 | 476.24 | Mapk15     |

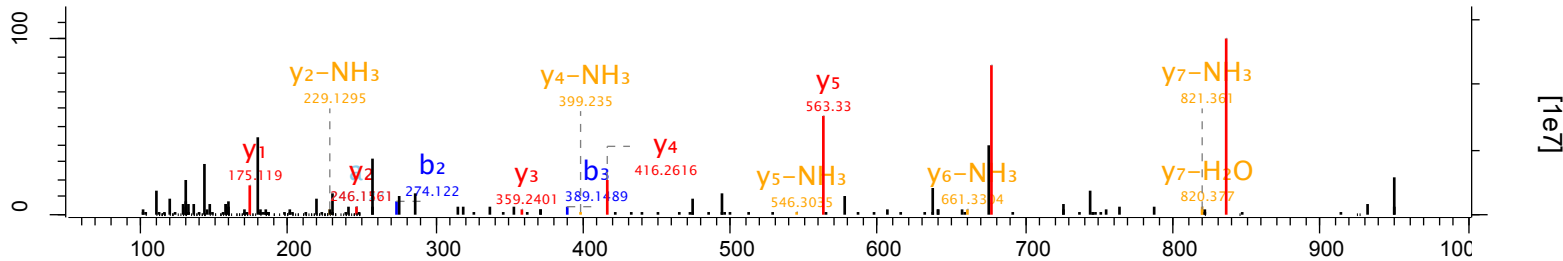



| Raw file                                   | Scan  | Method    | Score | m/z    | Gene names |
|--------------------------------------------|-------|-----------|-------|--------|------------|
| 20121216_EXQ1_AtDe_50CM_LFQ_myotubes_OG3_4 | 33981 | FTMS; HCD | 56.42 | 673.68 | Milr1      |

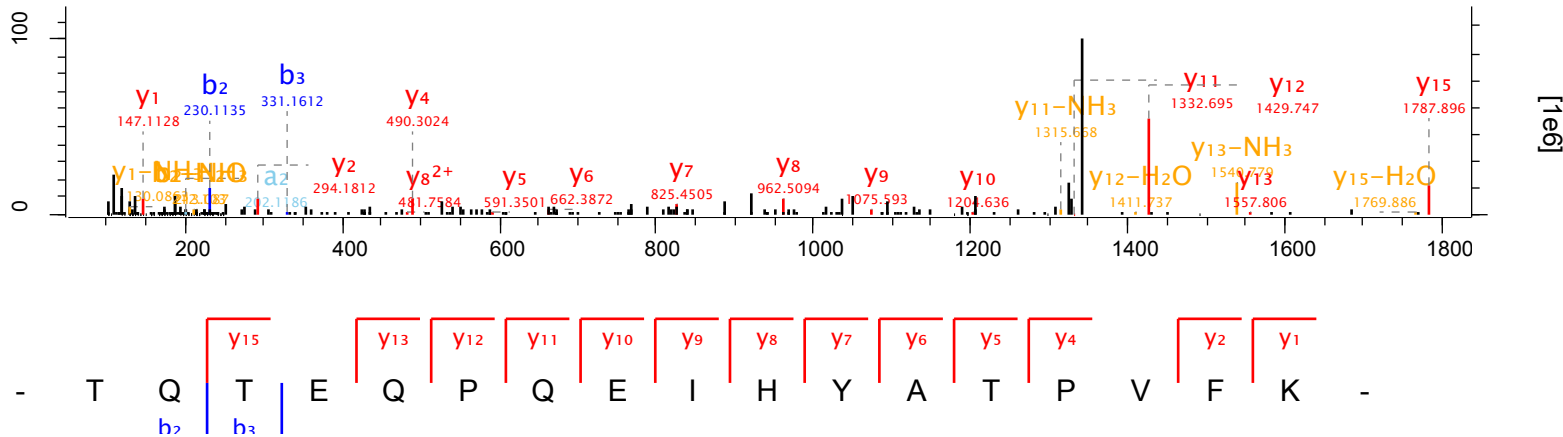

| Raw file                                   | Scan  | Method    | Score  | m/z    | Gene names |
|--------------------------------------------|-------|-----------|--------|--------|------------|
| 20121216_EXQ1_AtDe_50CM_LFQ_myotubes_OG3_4 | 34942 | FTMS; HCD | 112.24 | 561.31 | Tmem251    |

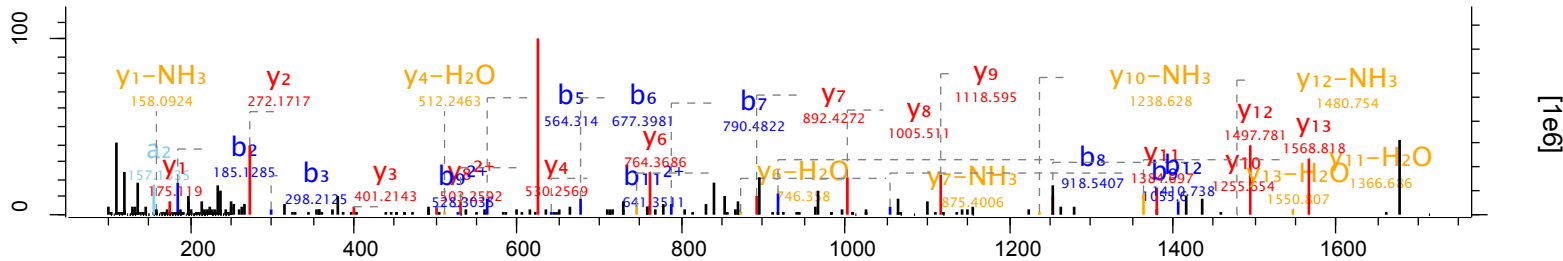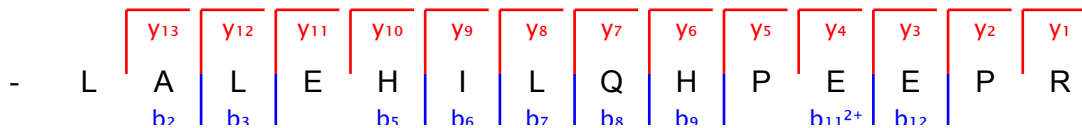

| Raw file                                   | Scan  | Method    | Score | m/z    | Gene names |
|--------------------------------------------|-------|-----------|-------|--------|------------|
| 20121216_EXQ1_AtDe_50CM_LFQ_myotubes_OG3_4 | 35020 | FTMS; HCD | 45.46 | 840.94 | Tmem251    |

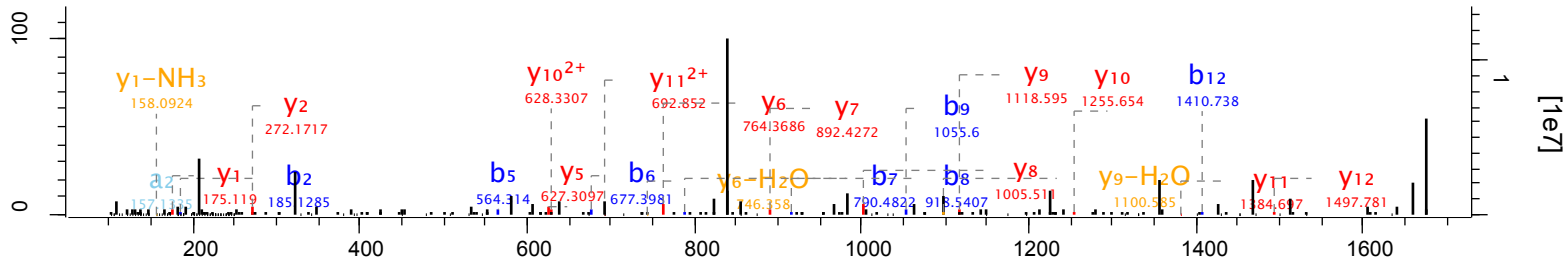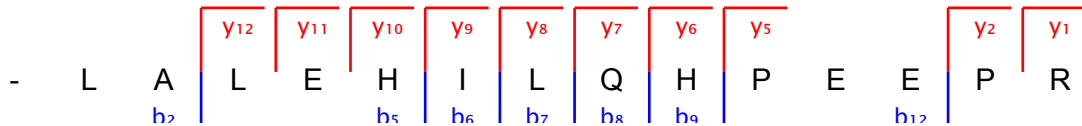

| Raw file                                   | Scan  | Method    | Score | m/z     | Gene names |
|--------------------------------------------|-------|-----------|-------|---------|------------|
| 20121216_EXQ1_AtDe_50CM_LFQ_myotubes_OG3_4 | 41594 | FTMS; HCD | 85.56 | 1101.48 | Elof1      |

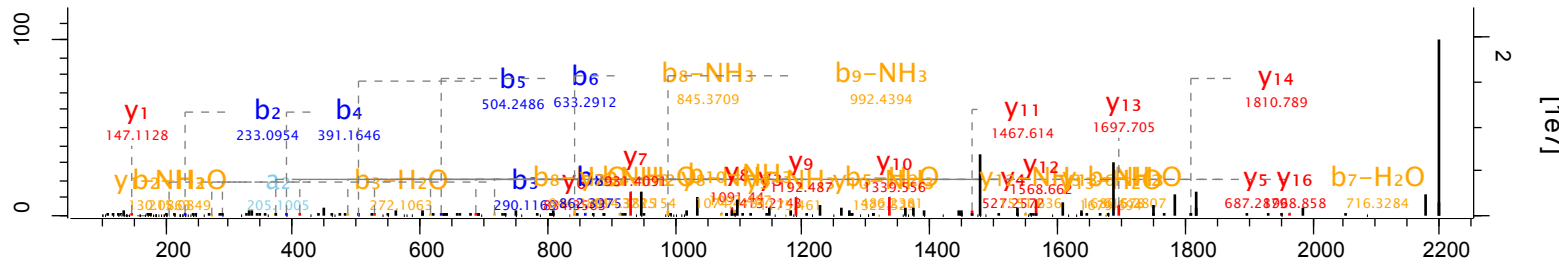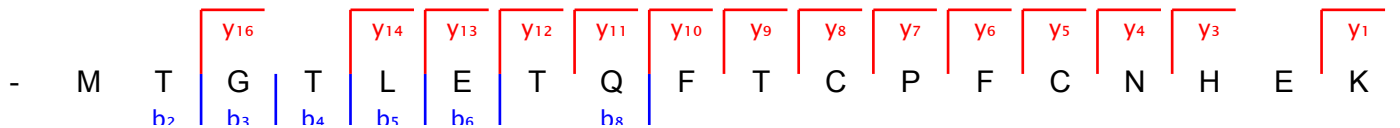

| Raw file                                   | Scan  | Method    | Score | m/z    | Gene names |
|--------------------------------------------|-------|-----------|-------|--------|------------|
| 20121216_EXQ1_AtDe_50CM_LFQ_myotubes_OG3_4 | 41600 | FTMS; HCD | 71.38 | 482.79 | Plch1      |

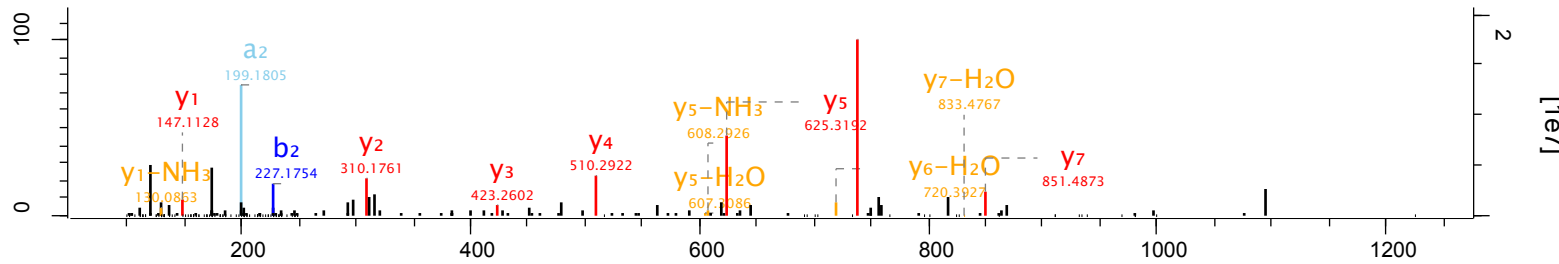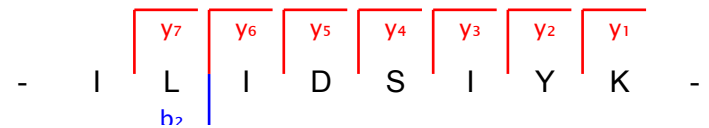

| Raw file                                   | Scan  | Method    | Score  | m/z    | Gene names |
|--------------------------------------------|-------|-----------|--------|--------|------------|
| 20121216_EXQ1_AtDe_50CM_LFQ_myotubes_OG3_4 | 45041 | FTMS; HCD | 109.48 | 844.89 | Hnrnpa0    |

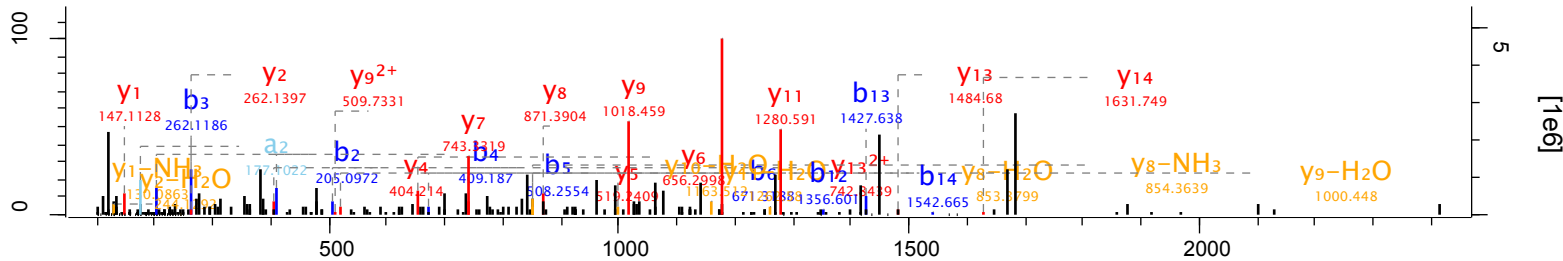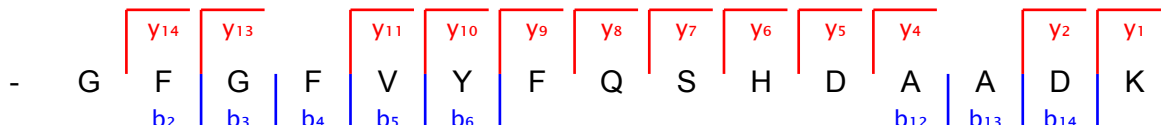

| Raw file                                   | Scan  | Method    | Score | m/z    | Gene names |
|--------------------------------------------|-------|-----------|-------|--------|------------|
| 20121216_EXQ1_AtDe_50CM_LFQ_myotubes_OG3_4 | 46138 | FTMS; HCD | 58.98 | 482.79 | Plch1      |

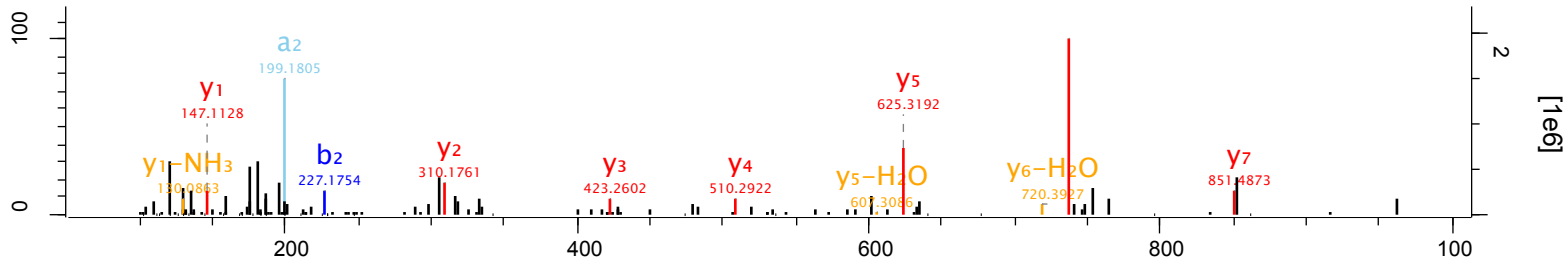

| Raw file                                   | Scan  | Method    | Score  | m/z     | Gene names |
|--------------------------------------------|-------|-----------|--------|---------|------------|
| 20121216_EXQ1_AtDe_50CM_LFQ_myotubes_OG3_4 | 47615 | FTMS; HCD | 150.14 | 1073.54 | B9d2       |

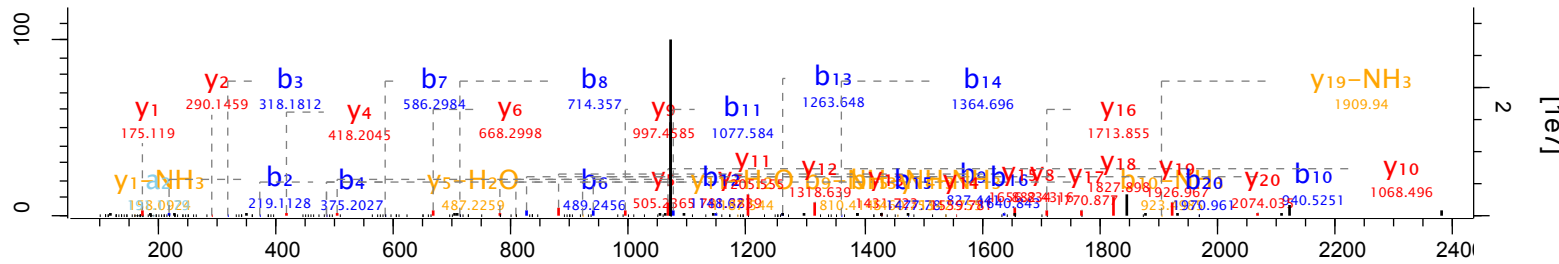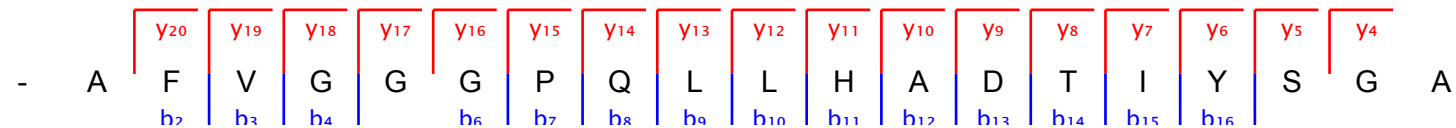



| Raw file                                   | Scan  | Method    | Score | m/z    | Gene names |
|--------------------------------------------|-------|-----------|-------|--------|------------|
| 20121216_EXQ1_AtDe_50CM_LFQ_myotubes_OG3_4 | 48751 | FTMS; HCD | 94.2  | 667.35 | Tmem106a   |

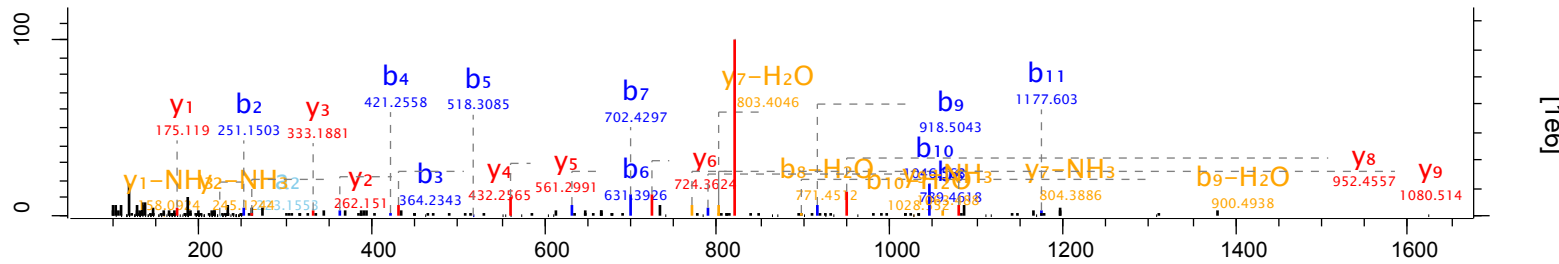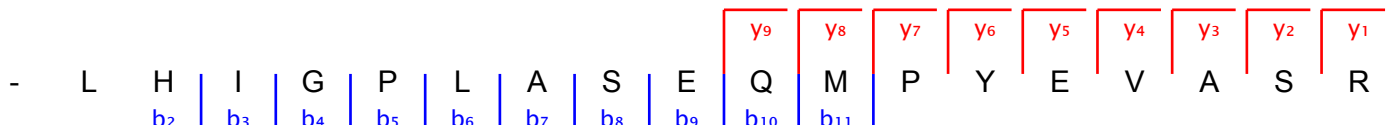

| Raw file                                   | Scan  | Method    | Score | m/z    | Gene names |
|--------------------------------------------|-------|-----------|-------|--------|------------|
| 20121216_EXQ1_AtDe_50CM_LFQ_myotubes_OG3_4 | 48757 | FTMS; HCD | 69.19 | 666.68 | Tmem106a   |

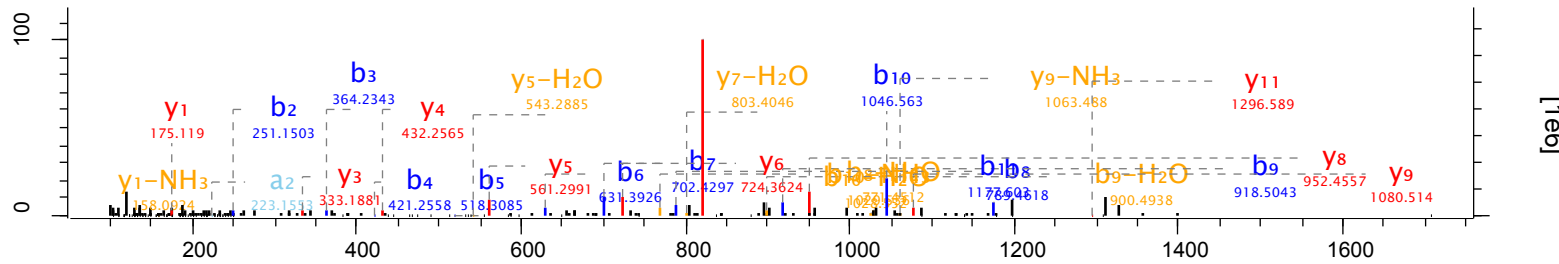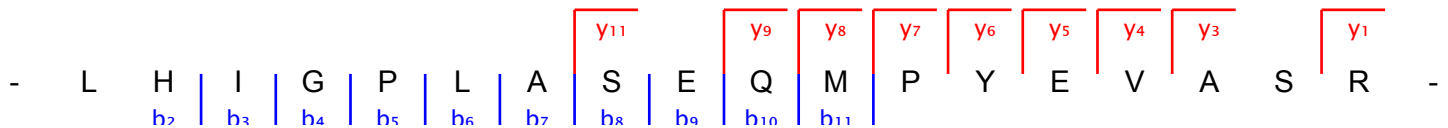

| Raw file                                   | Scan  | Method    | Score | m/z    | Gene names |
|--------------------------------------------|-------|-----------|-------|--------|------------|
| 20121216_EXQ1_AtDe_50CM_LFQ_myotubes_OG3_4 | 49903 | FTMS; HCD | 92.15 | 506.62 | Selm       |

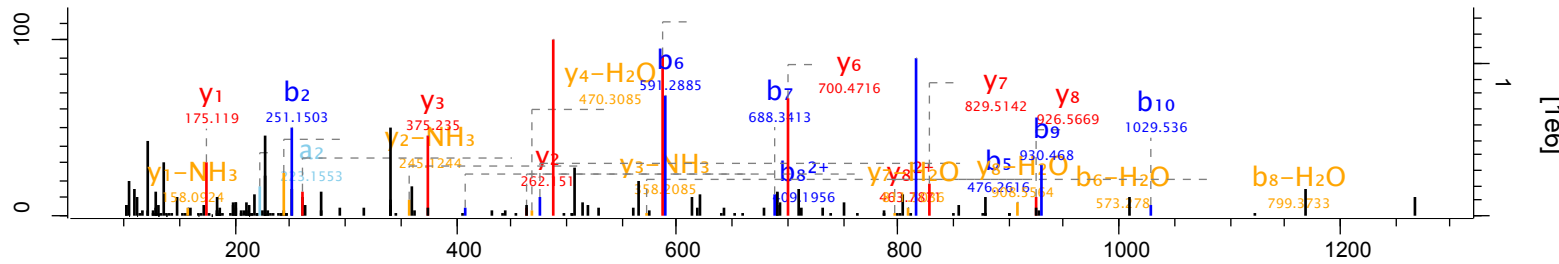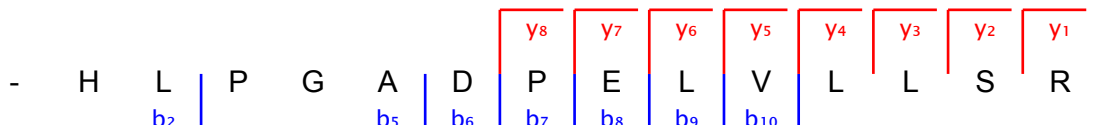

| Raw file                                   | Scan  | Method    | Score  | m/z     | Gene names |
|--------------------------------------------|-------|-----------|--------|---------|------------|
| 20121216_EXQ1_AtDe_50CM_LFQ_myotubes_OG3_4 | 52822 | FTMS; HCD | 122.39 | 1021.05 | Eva1b      |

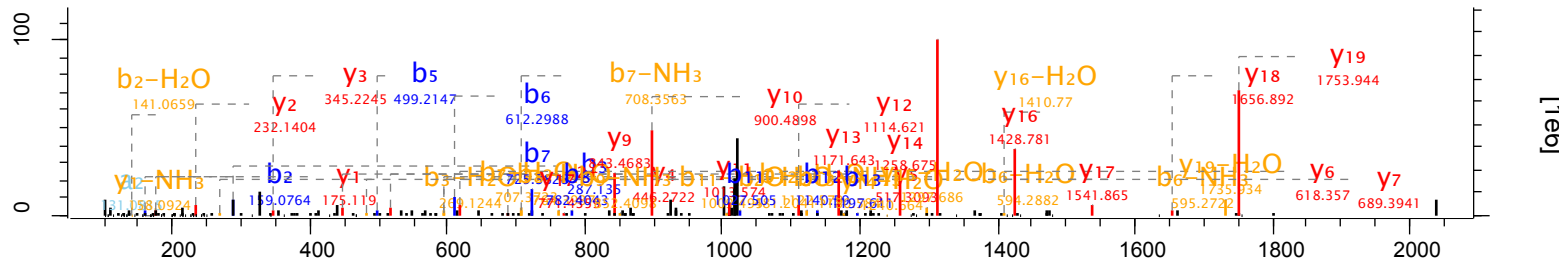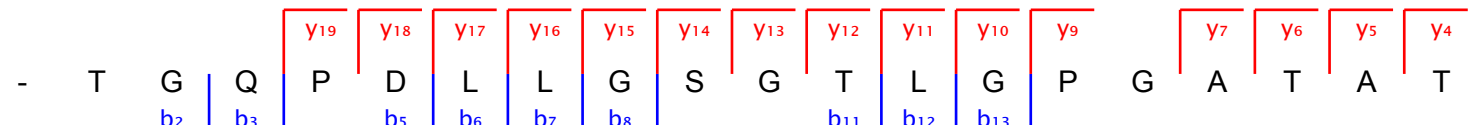

| Raw file                                   | Scan  | Method    | Score  | m/z   | Gene names |
|--------------------------------------------|-------|-----------|--------|-------|------------|
| 20121216_EXQ1_AtDe_50CM_LFQ_myotubes_OG3_4 | 52908 | FTMS; HCD | 164.11 | 681.4 | Acaca      |

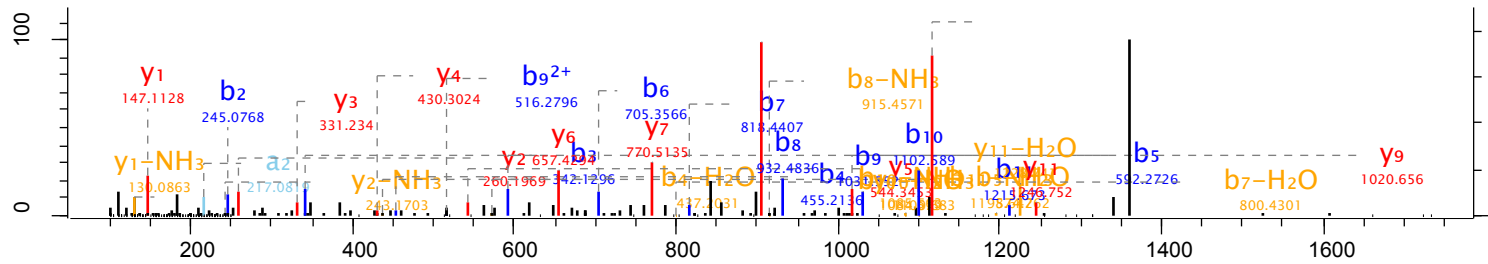

[1e7]

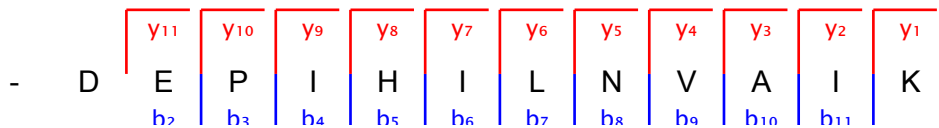



| Raw file                                   | Scan  | Method    | Score | m/z     | Gene names |
|--------------------------------------------|-------|-----------|-------|---------|------------|
| 20121216_EXQ1_AtDe_50CM_LFQ_myotubes_OG3_4 | 55357 | FTMS; HCD | 67.11 | 1117.07 | Lpar6      |

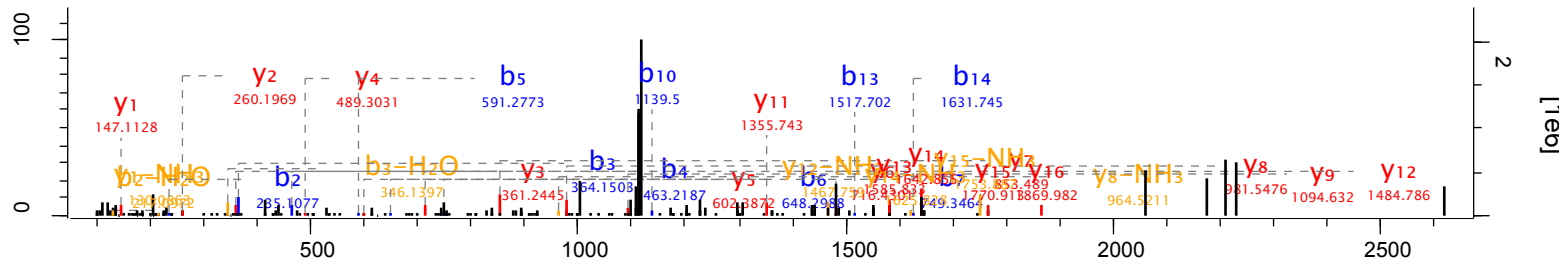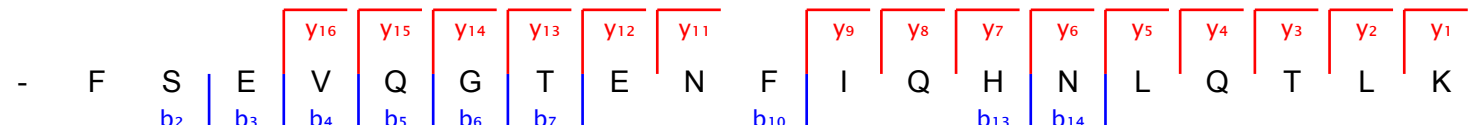

| Raw file                                   | Scan  | Method    | Score | m/z    | Gene names |
|--------------------------------------------|-------|-----------|-------|--------|------------|
| 20121216_EXQ1_AtDe_50CM_LFQ_myotubes_OG3_4 | 55359 | FTMS; HCD | 70.44 | 511.61 | Fzd3       |

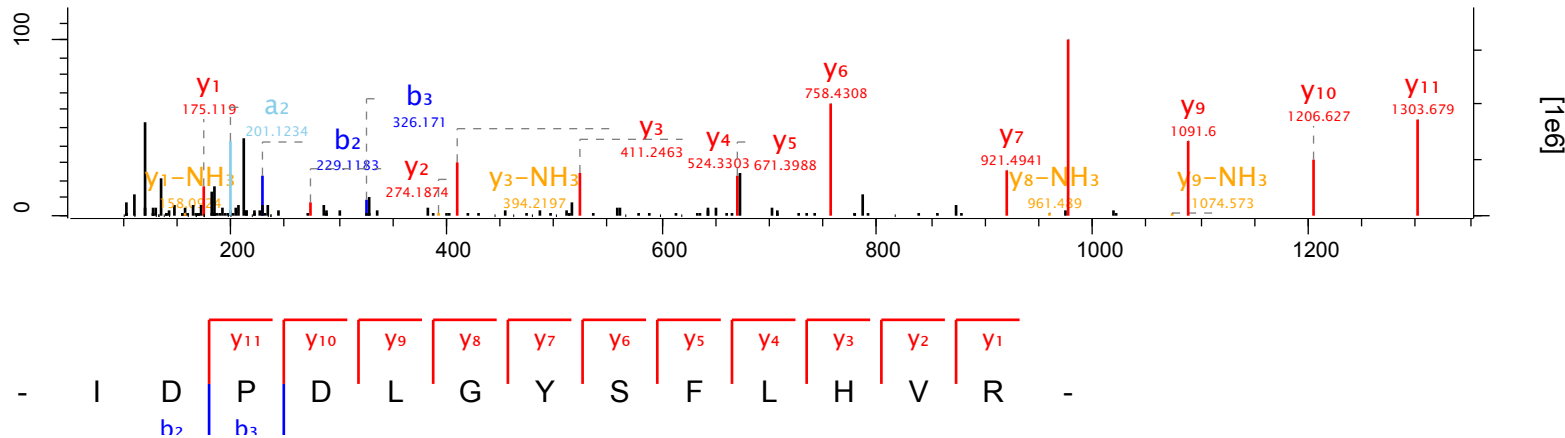



| Raw file                                   | Scan  | Method    | Score | m/z   | Gene names |
|--------------------------------------------|-------|-----------|-------|-------|------------|
| 20121216_EXQ1_AtDe_50CM_LFQ_myotubes_OG3_4 | 55932 | FTMS; HCD | 42.84 | 681.3 | Tmem8c     |

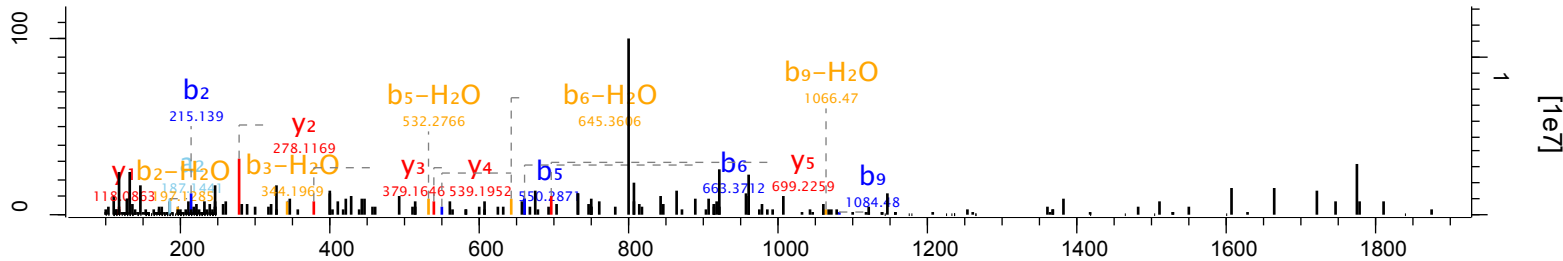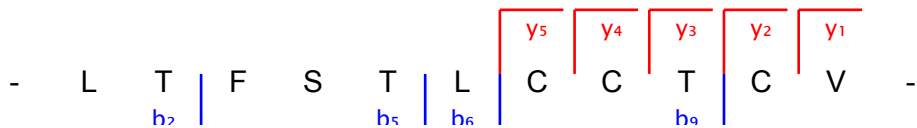

| Raw file                                   | Scan  | Method    | Score  | m/z    | Gene names |
|--------------------------------------------|-------|-----------|--------|--------|------------|
| 20121216_EXQ1_AtDe_50CM_LFQ_myotubes_OG3_4 | 56831 | FTMS; HCD | 167.12 | 564.84 | Traf3ip1   |

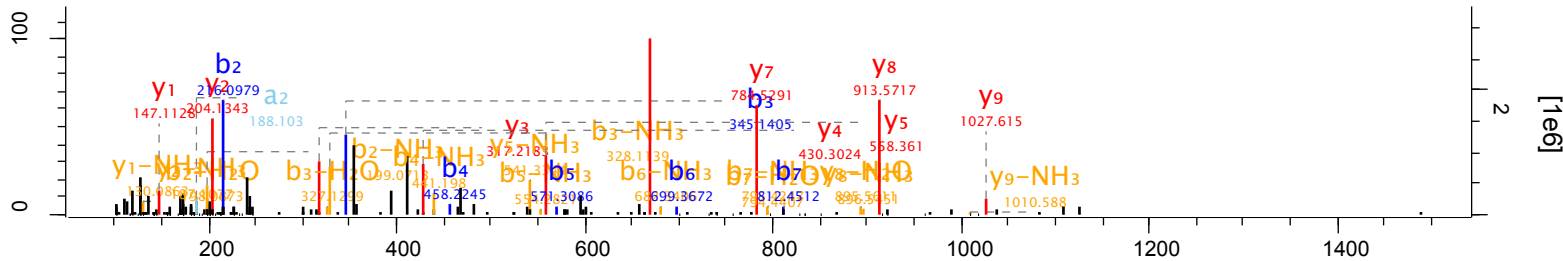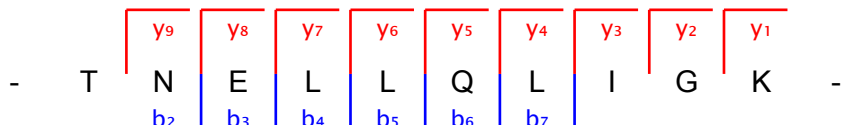

| Raw file                                   | Scan  | Method    | Score  | m/z    | Gene names |
|--------------------------------------------|-------|-----------|--------|--------|------------|
| 20121216_EXQ1_AtDe_50CM_LFQ_myotubes_OG3_4 | 57244 | FTMS; HCD | 103.31 | 760.37 | Cnih4      |

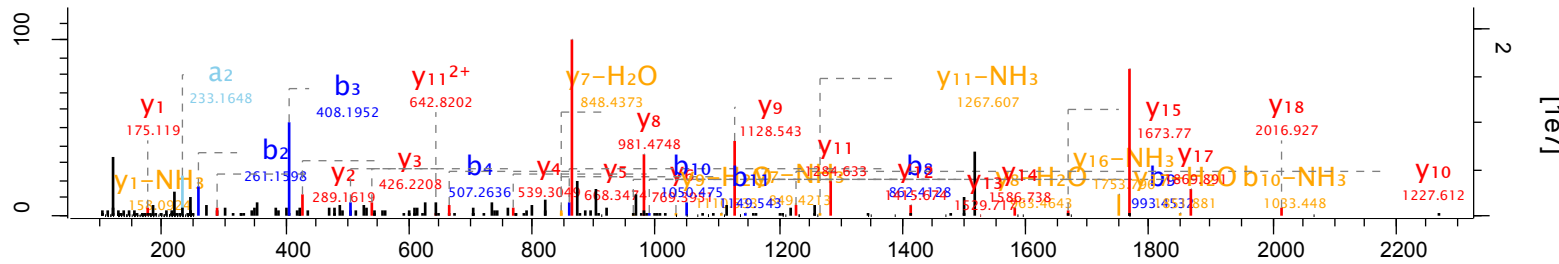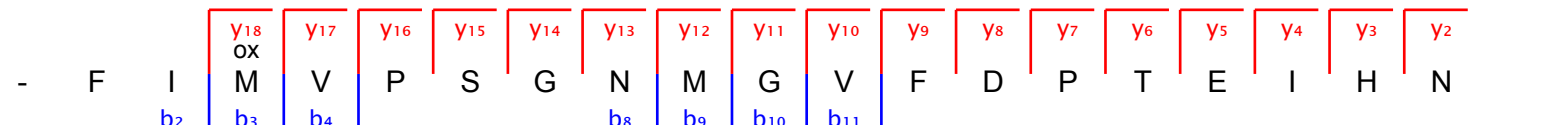

| Raw file                                   | Scan  | Method    | Score | m/z     | Gene names |
|--------------------------------------------|-------|-----------|-------|---------|------------|
| 20121216_EXQ1_AtDe_50CM_LFQ_myotubes_OG3_4 | 57250 | FTMS; HCD | 61.96 | 1139.04 | Cnih4      |

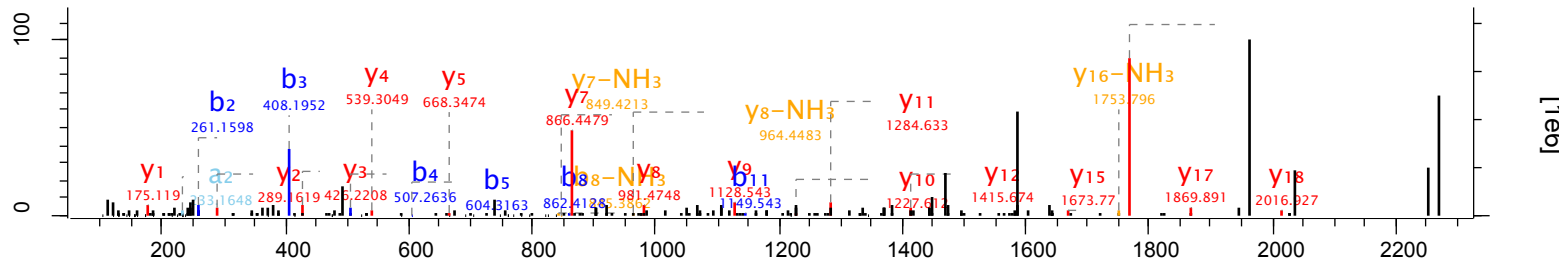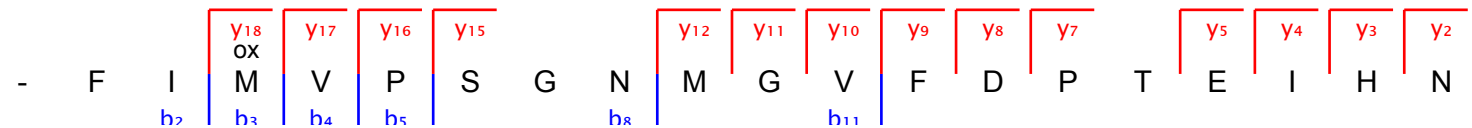

| Raw file                                   | Scan  | Method    | Score | m/z     | Gene names |
|--------------------------------------------|-------|-----------|-------|---------|------------|
| 20121216_EXQ1_AtDe_50CM_LFQ_myotubes_OG3_4 | 57295 | FTMS; HCD | 89.83 | 1140.05 | Cnih4      |

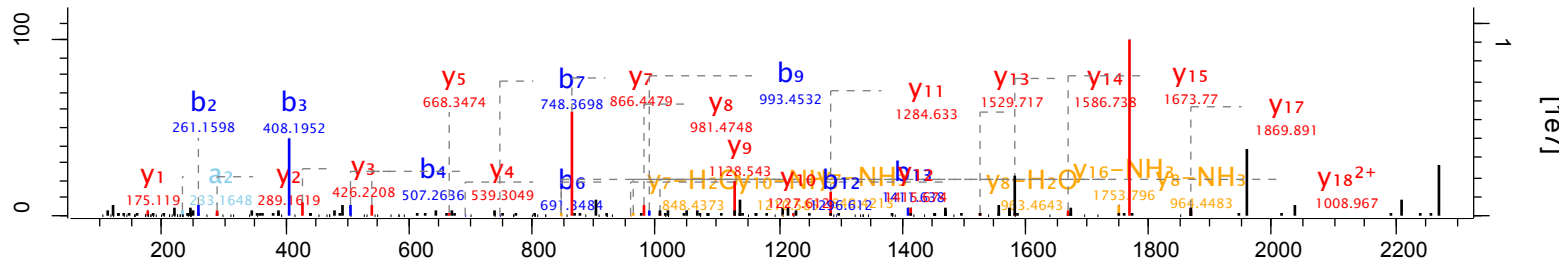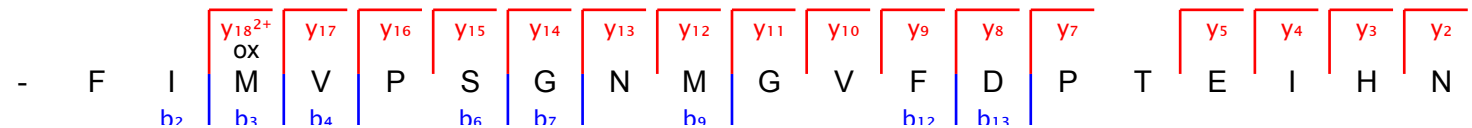

| Raw file                                   | Scan  | Method    | Score  | m/z    | Gene names |
|--------------------------------------------|-------|-----------|--------|--------|------------|
| 20121216_EXQ1_AtDe_50CM_LFQ_myotubes_OG3_4 | 59530 | FTMS; HCD | 116.28 | 991.85 | Bad        |

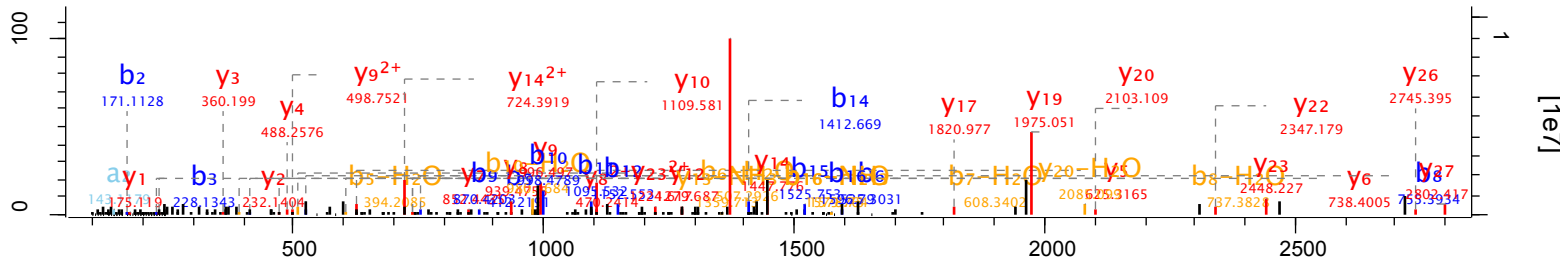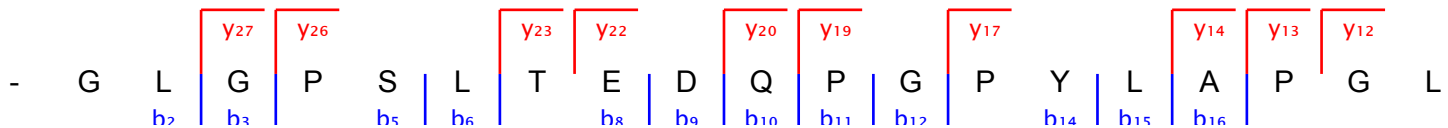

| Raw file                                   | Scan  | Method    | Score  | m/z    | Gene names |
|--------------------------------------------|-------|-----------|--------|--------|------------|
| 20121216_EXQ1_AtDe_50CM_LFQ_myotubes_OG3_4 | 60325 | FTMS; HCD | 144.72 | 754.37 | Cnih4      |

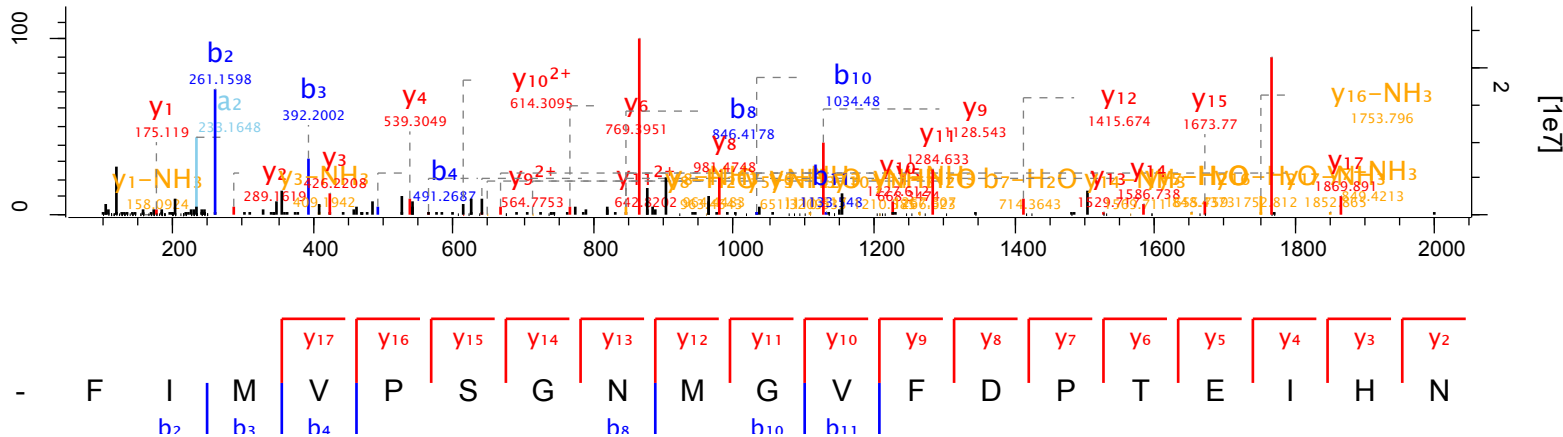

| Raw file                                   | Scan  | Method    | Score  | m/z     | Gene names |
|--------------------------------------------|-------|-----------|--------|---------|------------|
| 20121216_EXQ1_AtDe_50CM_LFQ_myotubes_OG3_4 | 60344 | FTMS; HCD | 119.66 | 1131.55 | Cnih4      |

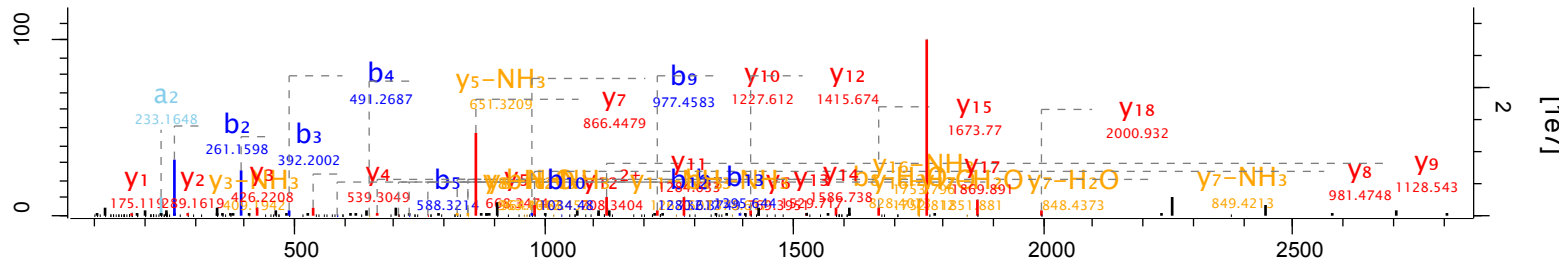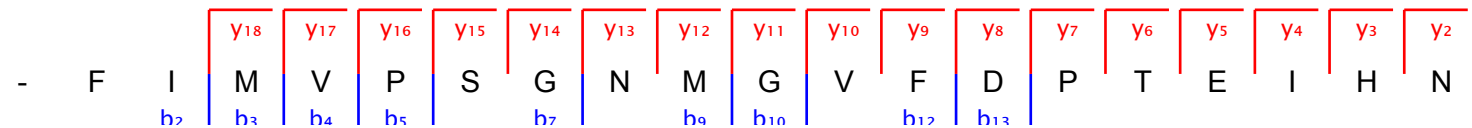



| Raw file                                   | Scan  | Method    | Score | m/z    | Gene names |
|--------------------------------------------|-------|-----------|-------|--------|------------|
| 20121216_EXQ1_AtDe_50CM_LFQ_myotubes_OG3_4 | 60413 | FTMS; HCD | 33.92 | 565.64 | Cnih4      |

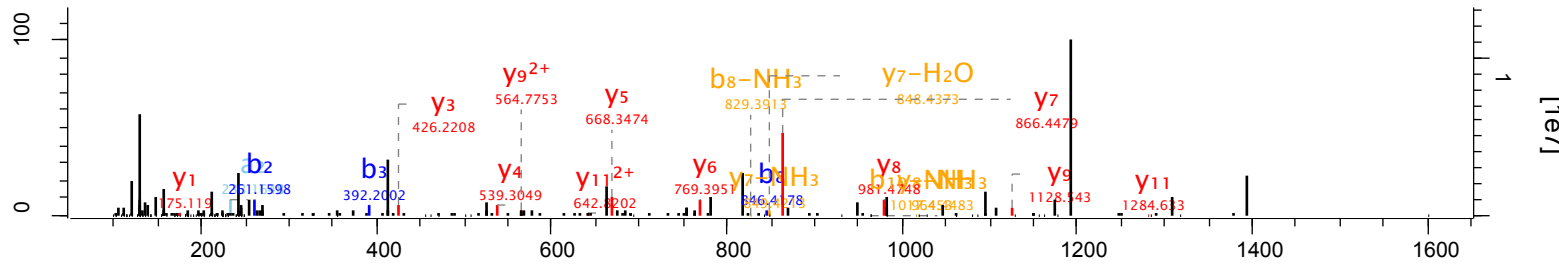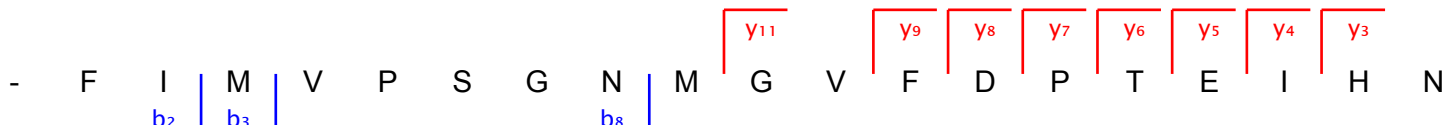

| Raw file                                   | Scan  | Method    | Score  | m/z    | Gene names |
|--------------------------------------------|-------|-----------|--------|--------|------------|
| 20121216_EXQ1_AtDe_50CM_LFQ_myotubes_OG3_4 | 62286 | FTMS; HCD | 127.16 | 878.13 | Rbbp4      |

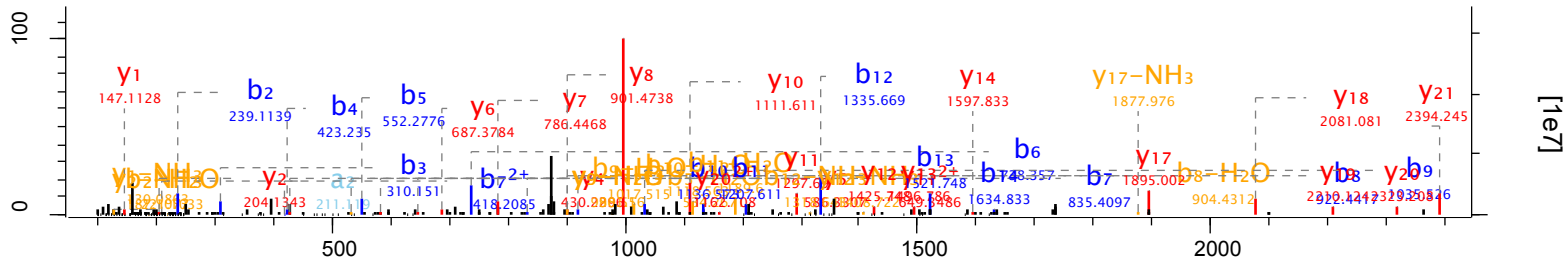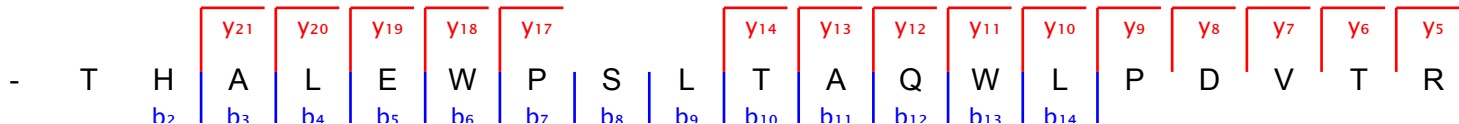



| Raw file                                   | Scan  | Method    | Score | m/z    | Gene names |
|--------------------------------------------|-------|-----------|-------|--------|------------|
| 20121216_EXQ1_AtDe_50CM_LFQ_myotubes_OG3_4 | 62913 | FTMS; HCD | 94.38 | 780.08 | Eaf1       |

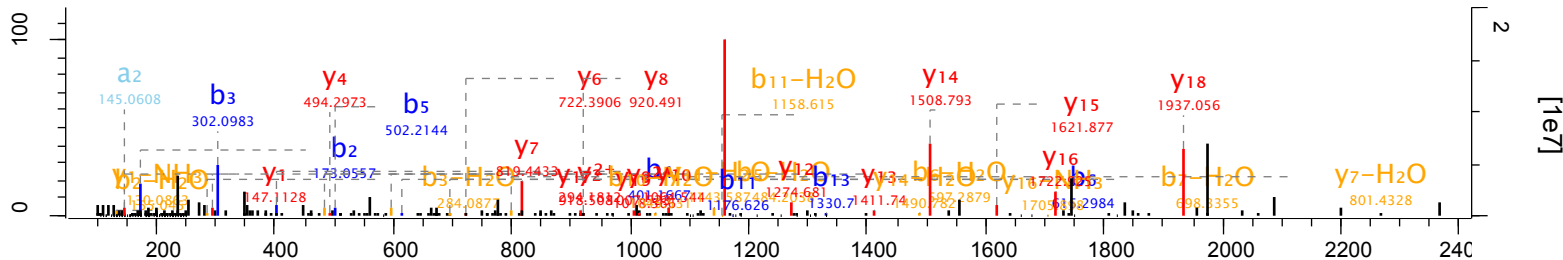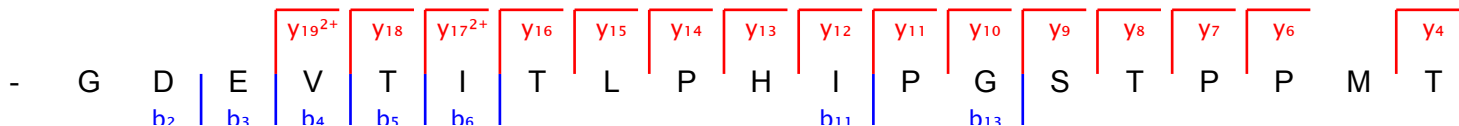

| Raw file                                   | Scan  | Method    | Score  | m/z     | Gene names |
|--------------------------------------------|-------|-----------|--------|---------|------------|
| 20121216_EXQ1_AtDe_50CM_LFQ_myotubes_OG3_4 | 62947 | FTMS; HCD | 119.27 | 1169.62 | Eaf1       |

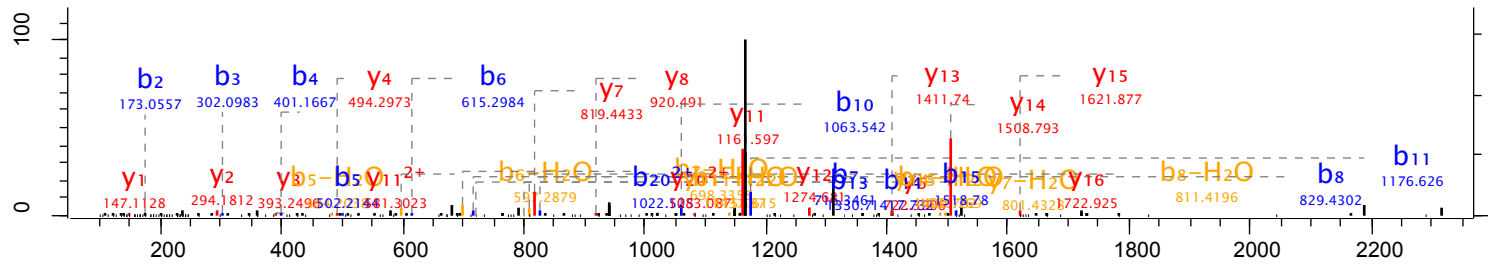

[1e7]

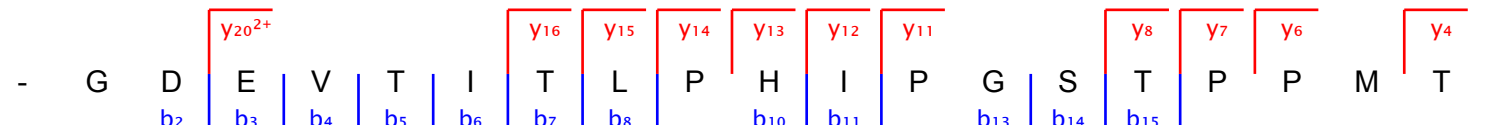

| Raw file                                   | Scan  | Method    | Score  | m/z   | Gene names |
|--------------------------------------------|-------|-----------|--------|-------|------------|
| 20121216_EXQ1_AtDe_50CM_LFQ_myotubes_OG3_4 | 64408 | FTMS; HCD | 102.87 | 667.4 | Nkiras1    |

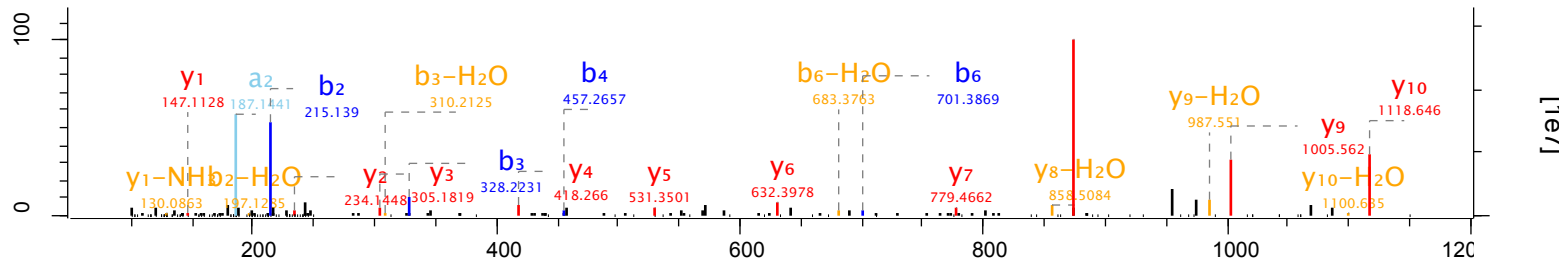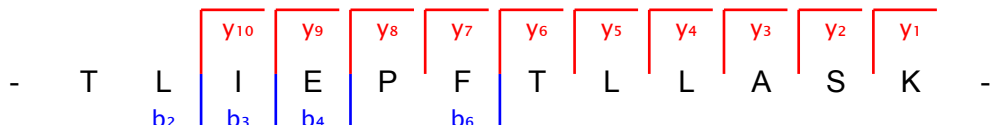

Raw file

20121216\_EXQ1\_AtDe\_50CM\_LFQ\_myotubes\_OG3\_4

Scan

65648

Method

FTMS; HCD

Score

83.4

m/z

1100.59

Gene names

Serinc2

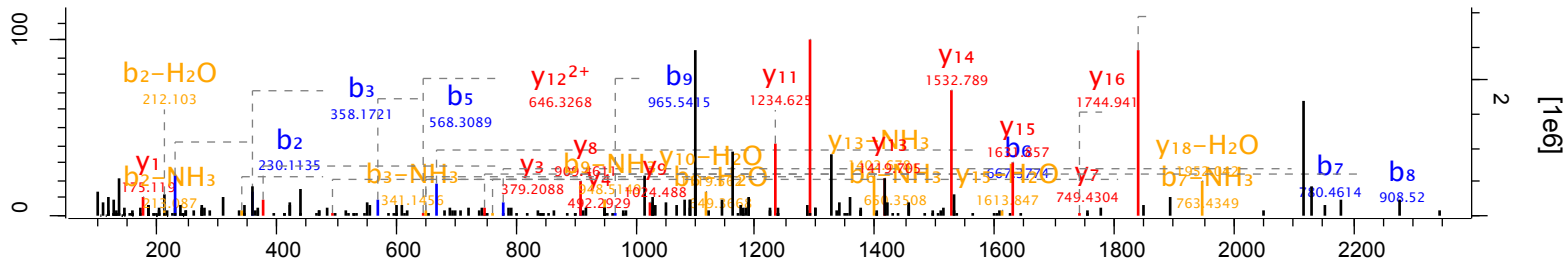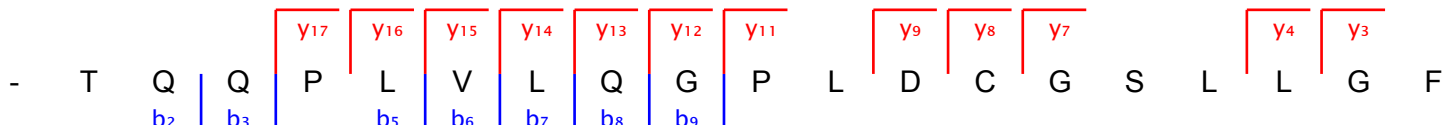

| Raw file                                   | Scan  | Method    | Score  | m/z    | Gene names |
|--------------------------------------------|-------|-----------|--------|--------|------------|
| 20121216_EXQ1_AtDe_50CM_LFQ_myotubes_OG3_4 | 65803 | FTMS; HCD | 117.94 | 715.91 | Uqcr11     |

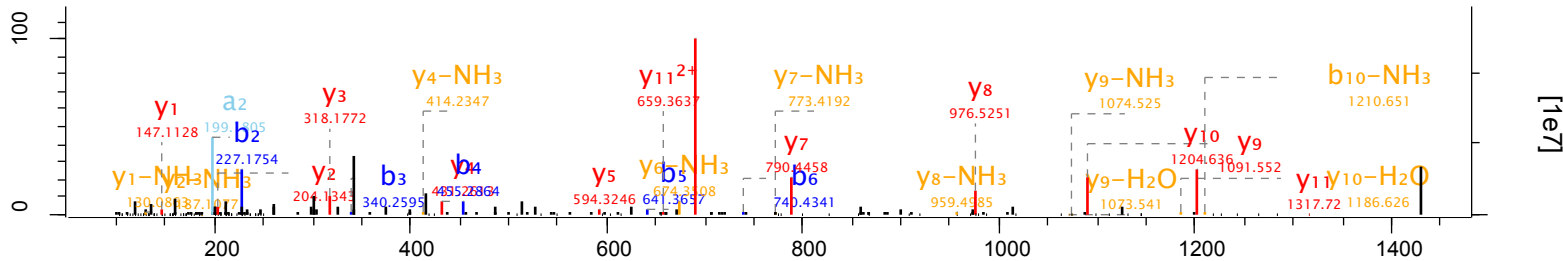



| Raw file                                   | Scan  | Method    | Score | m/z    | Gene names |
|--------------------------------------------|-------|-----------|-------|--------|------------|
| 20121216_EXQ1_AtDe_50CM_LFQ_myotubes_OG3_4 | 66153 | FTMS; HCD | 87.14 | 619.35 | Gipc2      |

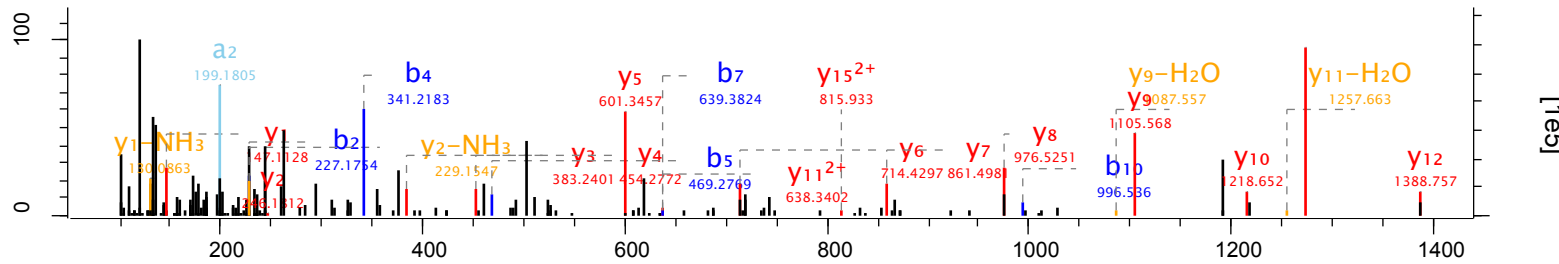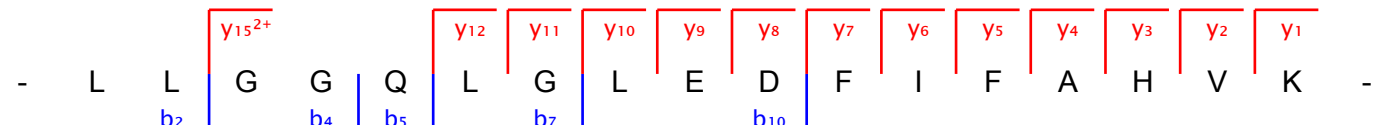

| Raw file                                   | Scan | Method    | Score | m/z    | Gene names |
|--------------------------------------------|------|-----------|-------|--------|------------|
| 20121216_EXQ1_AtDe_50CM_LFQ_myotubes_OG3_4 | 7578 | FTMS; HCD | 87.75 | 376.71 | Mcm9       |

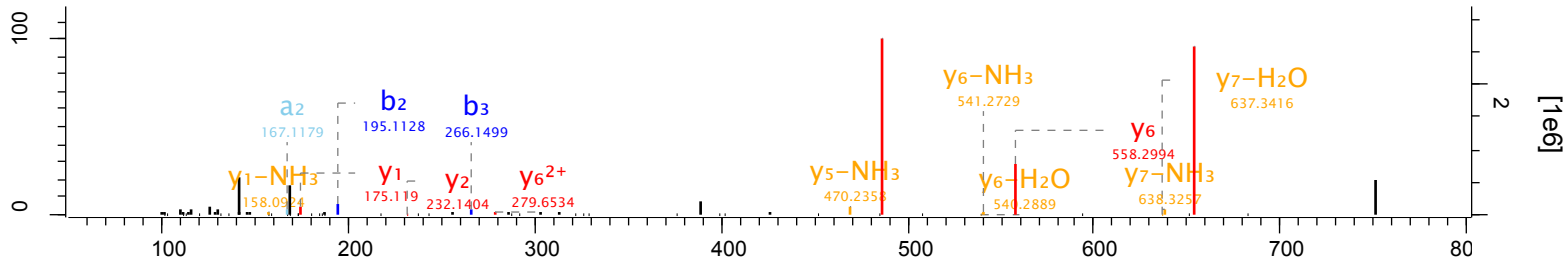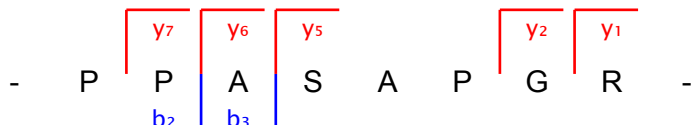

| Raw file                                   | Scan | Method    | Score | m/z    | Gene names |
|--------------------------------------------|------|-----------|-------|--------|------------|
| 20121216_EXQ1_AtDe_50CM_LFQ_myotubes_OG3_4 | 9917 | FTMS; HCD | 121.5 | 546.26 | Tm4sf1     |

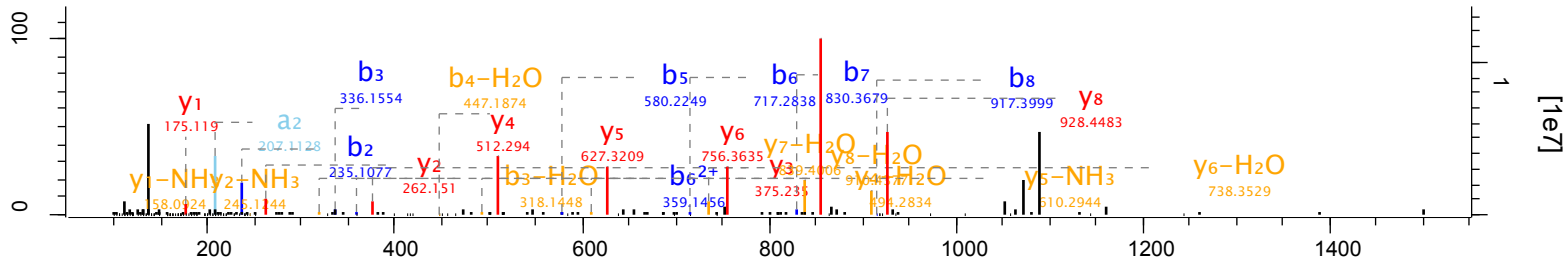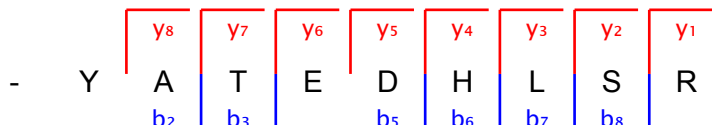

| Raw file                                   | Scan | Method    | Score  | m/z    | Gene names |
|--------------------------------------------|------|-----------|--------|--------|------------|
| 20121216_EXQ1_AtDe_50CM_LFQ_myotubes_OG3_4 | 9930 | FTMS; HCD | 100.25 | 364.51 | Tm4sf1     |

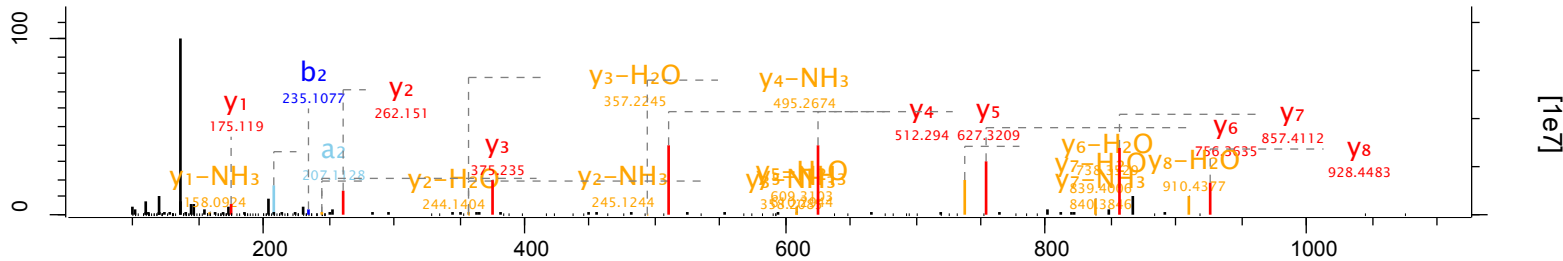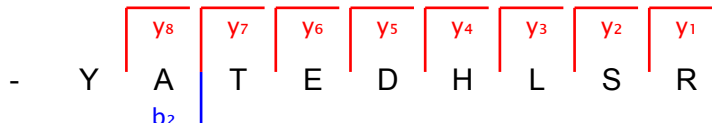

| Raw file                                   | Scan  | Method    | Score  | m/z    | Gene names |
|--------------------------------------------|-------|-----------|--------|--------|------------|
| 20121216_EXQ1_AtDe_50CM_LFQ_myotubes_OG3_5 | 10921 | FTMS; HCD | 116.55 | 680.25 | Anapc11    |

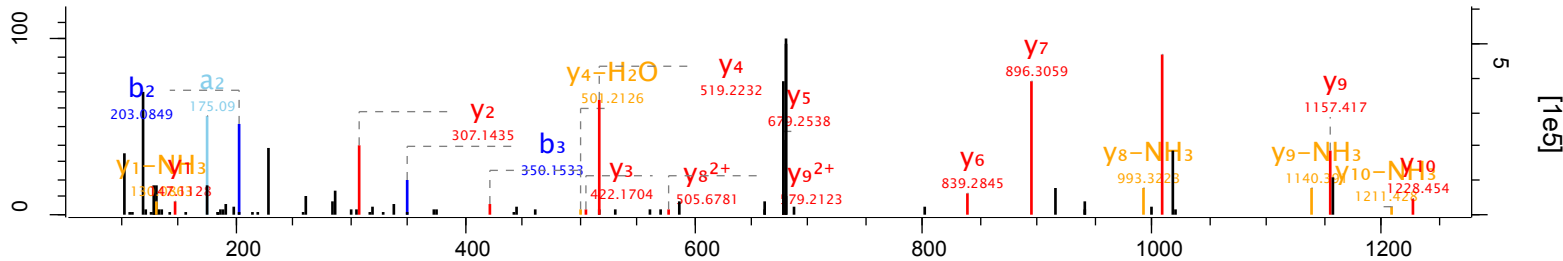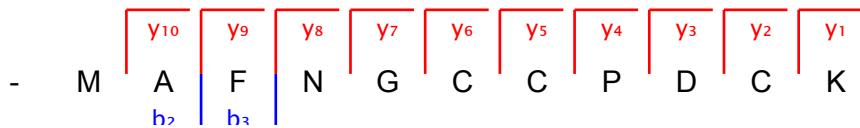

| Raw file                                   | Scan  | Method    | Score | m/z    | Gene names |
|--------------------------------------------|-------|-----------|-------|--------|------------|
| 20121216_EXQ1_AtDe_50CM_LFQ_myotubes_OG3_5 | 14876 | FTMS; HCD | 91.96 | 468.91 | Cyb561d2   |

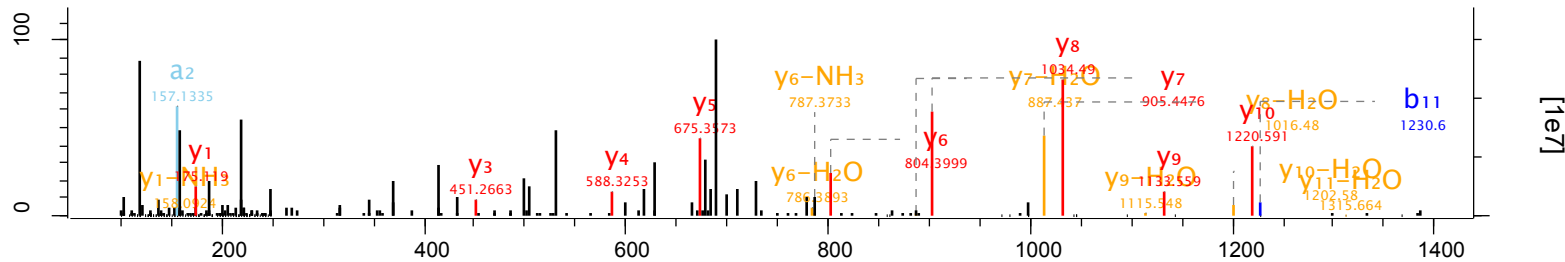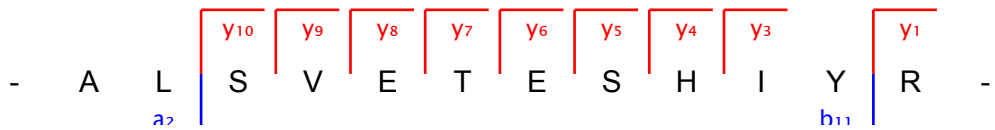

Raw file

20121216\_EXQ1\_AtDe\_50CM\_LFQ\_myotubes\_OG3\_5

Scan

14927

Method

FTMS; HCD

Score

161.99

m/z

703.37

Gene names

Cyb561d2

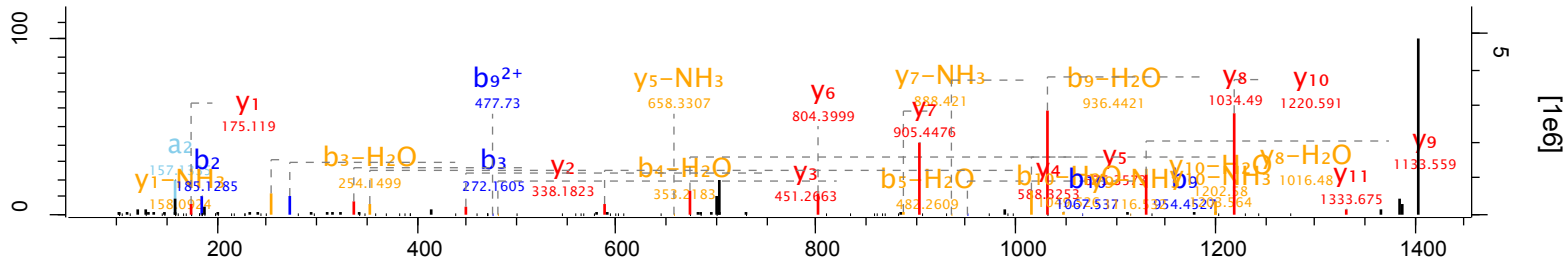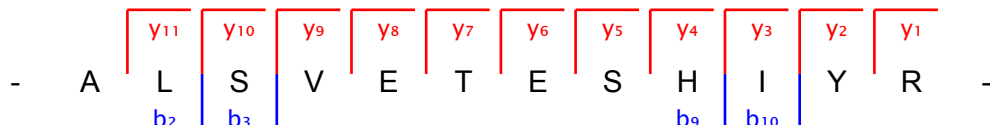

| Raw file                                   | Scan  | Method    | Score  | m/z    | Gene names |
|--------------------------------------------|-------|-----------|--------|--------|------------|
| 20121216_EXQ1_AtDe_50CM_LFQ_myotubes_OG3_5 | 20967 | FTMS; HCD | 109.15 | 470.56 | Vkorc1     |

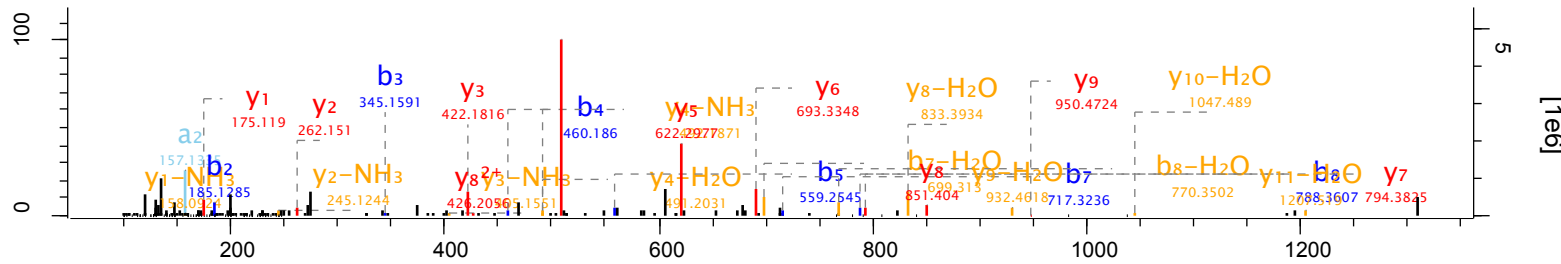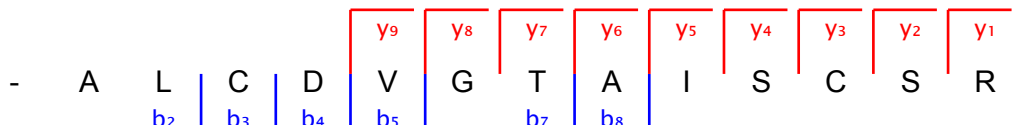



| Raw file                                   | Scan  | Method    | Score  | m/z    | Gene names |
|--------------------------------------------|-------|-----------|--------|--------|------------|
| 20121216_EXQ1_AtDe_50CM_LFQ_myotubes_OG3_5 | 20995 | FTMS; HCD | 186.16 | 705.33 | Vkorc1     |

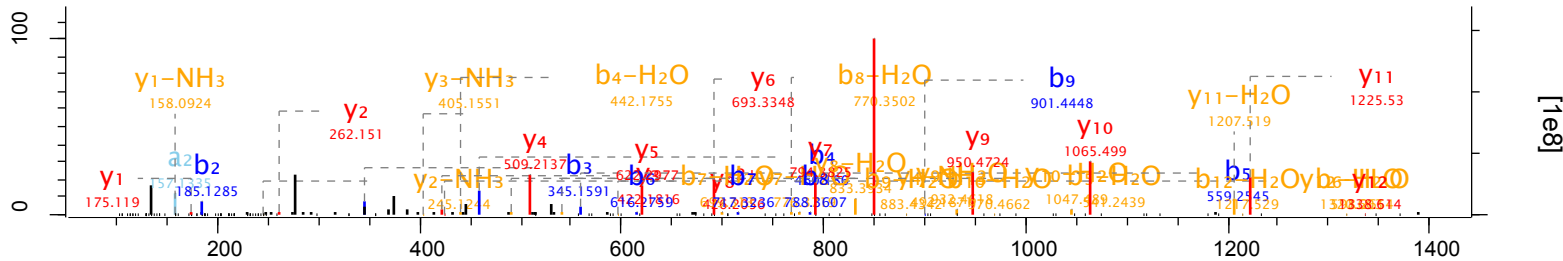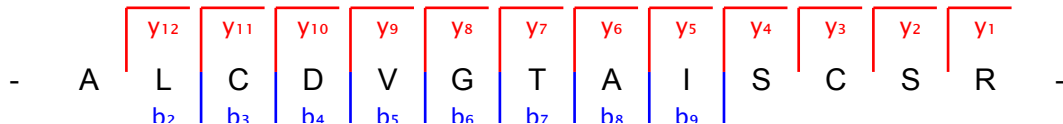

| Raw file                                   | Scan  | Method    | Score  | m/z    | Gene names |
|--------------------------------------------|-------|-----------|--------|--------|------------|
| 20121216_EXQ1_AtDe_50CM_LFQ_myotubes_OG3_5 | 22358 | FTMS; HCD | 103.35 | 476.24 | Mapk15     |

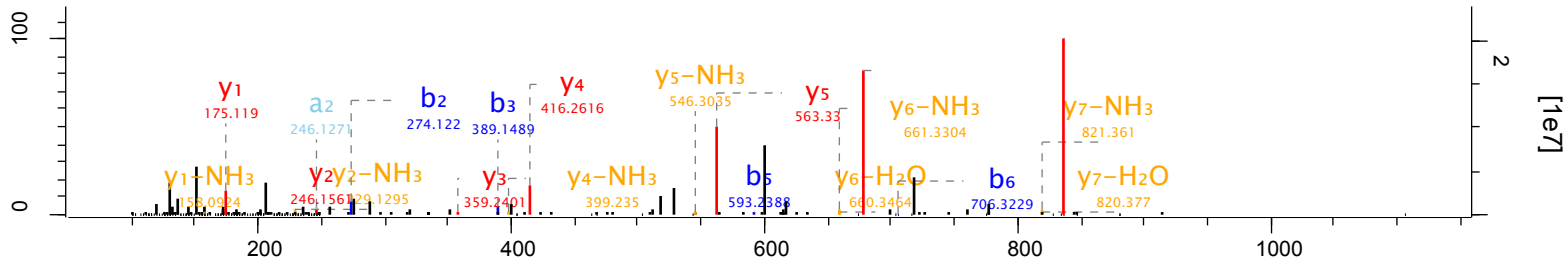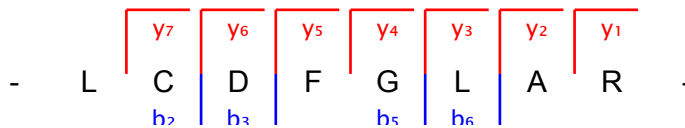

Raw file

20121216\_EXQ1\_AtDe\_50CM\_LFQ\_myotubes\_OG3\_5

Scan

29121

Method

FTMS; HCD

Score

80.56

m/z

919.77

Gene names

Slc39a11

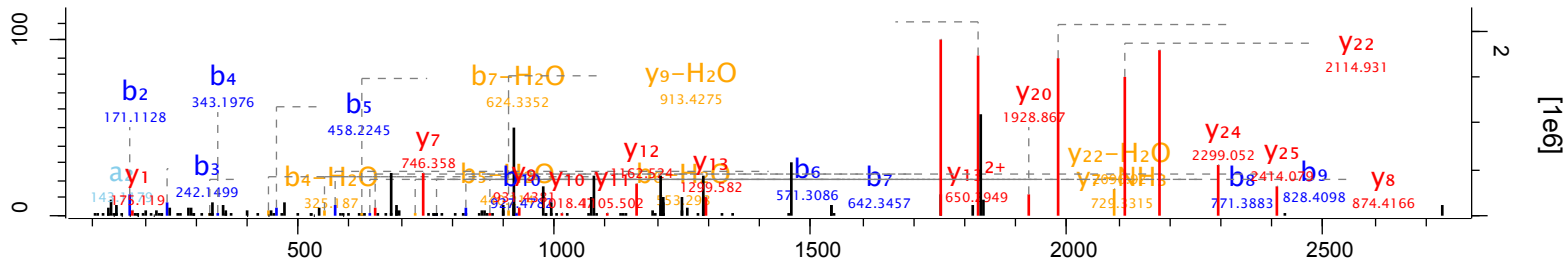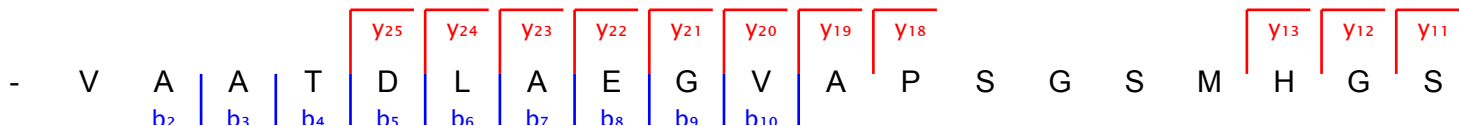

| Raw file                                   | Scan  | Method    | Score | m/z    | Gene names |
|--------------------------------------------|-------|-----------|-------|--------|------------|
| 20121216_EXQ1_AtDe_50CM_LFQ_myotubes_OG3_5 | 31872 | FTMS; HCD | 50.61 | 716.04 | Fopnl      |

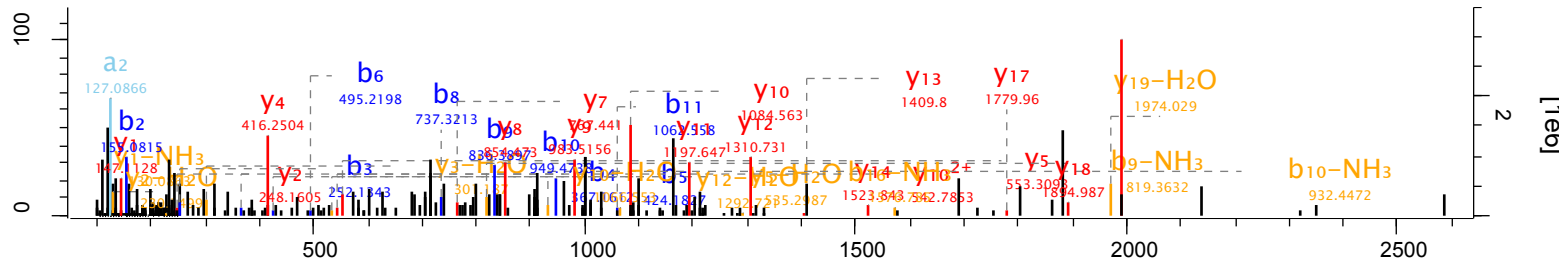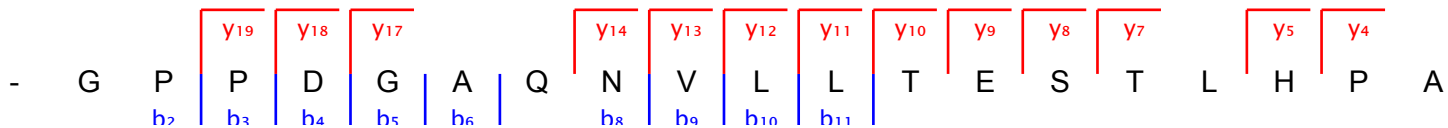

| Raw file                                   | Scan  | Method    | Score | m/z    | Gene names |
|--------------------------------------------|-------|-----------|-------|--------|------------|
| 20121216_EXQ1_AtDe_50CM_LFQ_myotubes_OG3_5 | 32817 | FTMS; HCD | 8.99  | 735.35 | Elof1      |

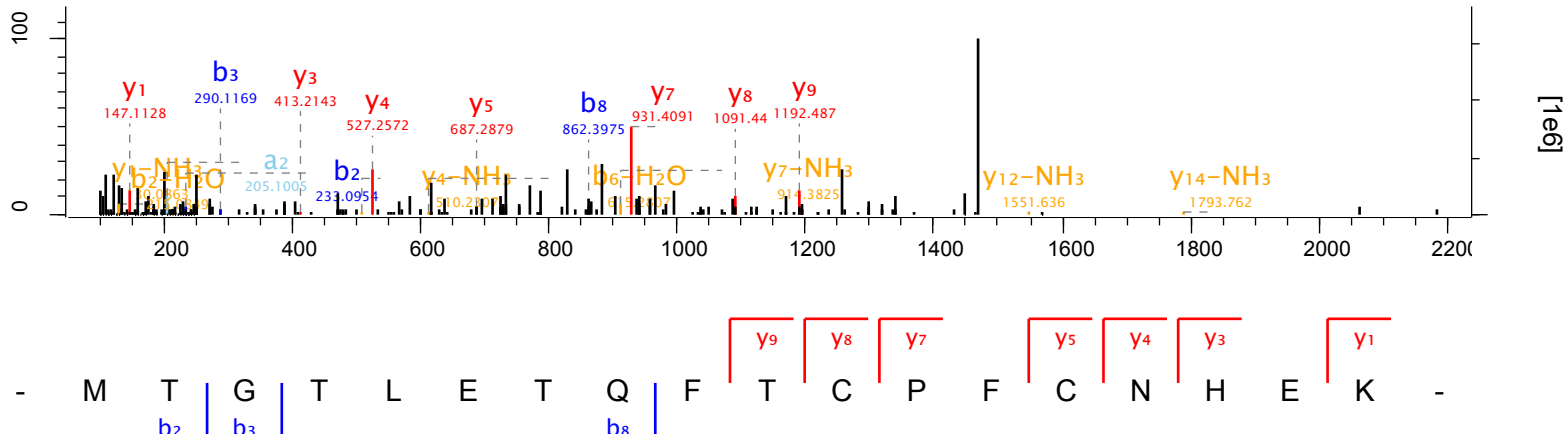

| Raw file                                   | Scan  | Method    | Score  | m/z    | Gene names |
|--------------------------------------------|-------|-----------|--------|--------|------------|
| 20121216_EXQ1_AtDe_50CM_LFQ_myotubes_OG3_5 | 32839 | FTMS; HCD | 176.44 | 734.66 | Elof1      |

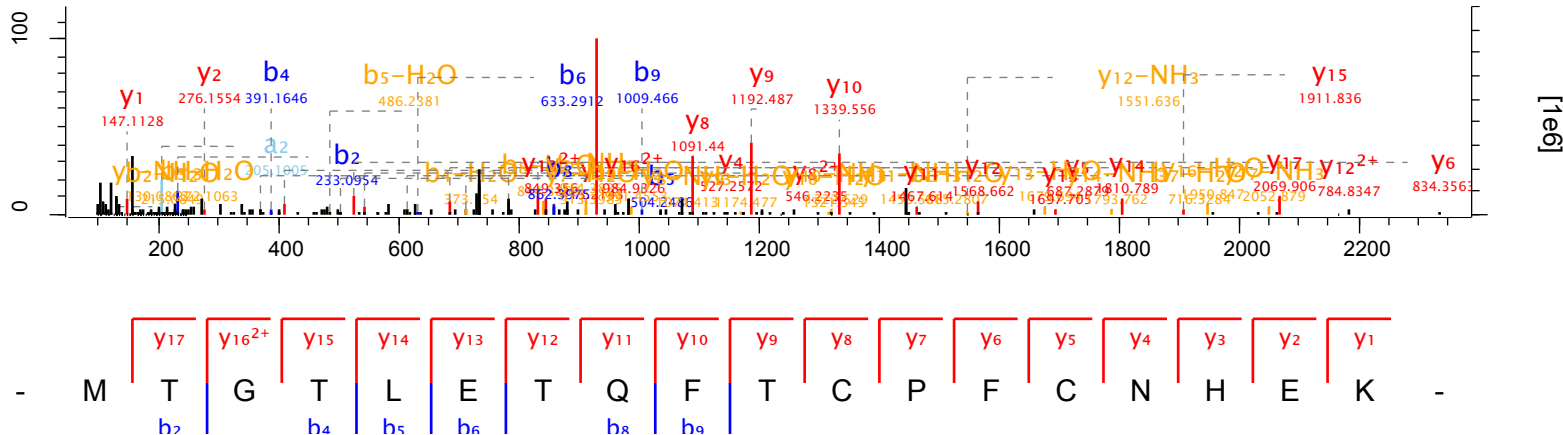

| Raw file                                   | Scan  | Method    | Score  | m/z     | Gene names |
|--------------------------------------------|-------|-----------|--------|---------|------------|
| 20121216_EXQ1_AtDe_50CM_LFQ_myotubes_OG3_5 | 32861 | FTMS; HCD | 217.65 | 1100.98 | Elof1      |

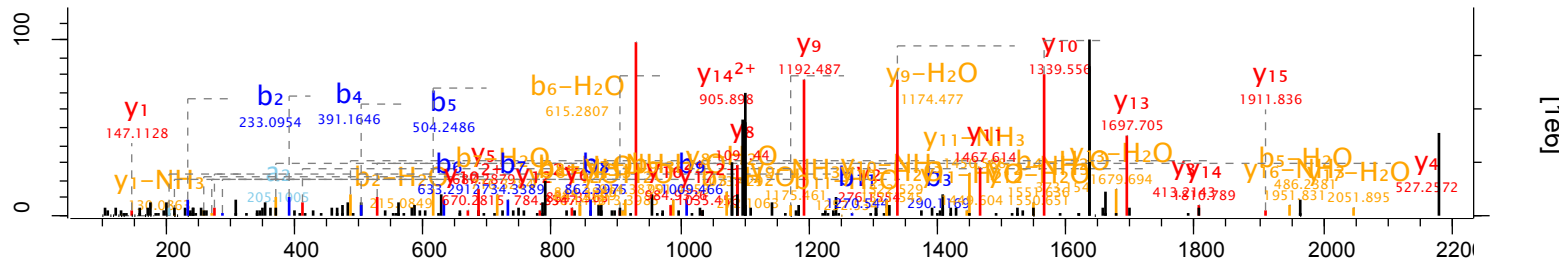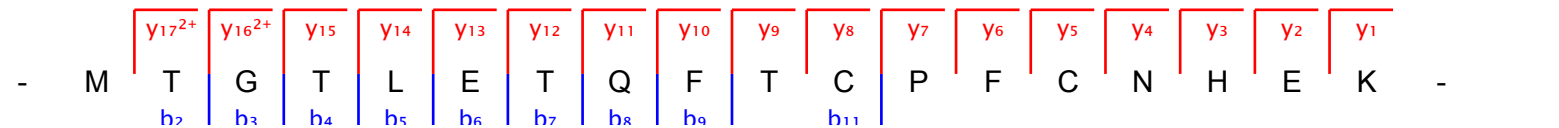

| Raw file                                   | Scan  | Method    | Score  | m/z    | Gene names |
|--------------------------------------------|-------|-----------|--------|--------|------------|
| 20121216_EXQ1_AtDe_50CM_LFQ_myotubes_OG3_5 | 33043 | FTMS; HCD | 195.77 | 784.37 | Coa6       |

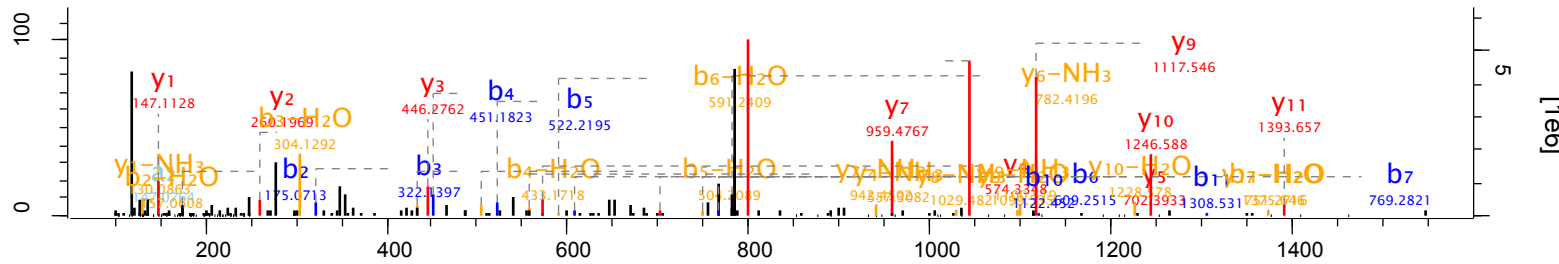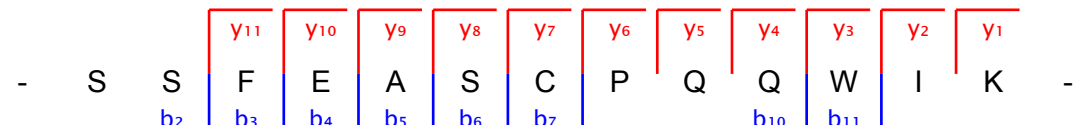



| Raw file                                   | Scan  | Method    | Score | m/z    | Gene names |
|--------------------------------------------|-------|-----------|-------|--------|------------|
| 20121216_EXQ1_AtDe_50CM_LFQ_myotubes_OG3_5 | 33247 | FTMS; HCD | 79.47 | 482.79 | Plch1      |

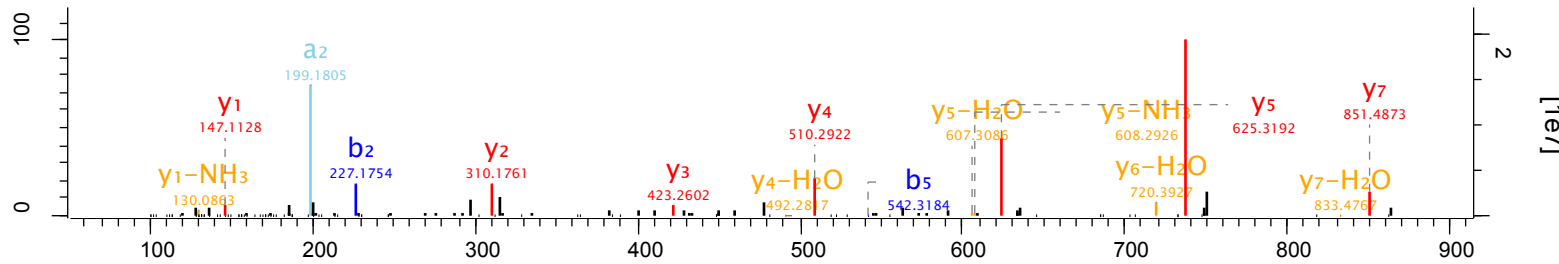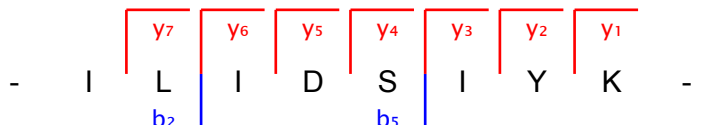

| Raw file                                   | Scan  | Method    | Score | m/z    | Gene names |
|--------------------------------------------|-------|-----------|-------|--------|------------|
| 20121216_EXQ1_AtDe_50CM_LFQ_myotubes_OG3_5 | 35846 | FTMS; HCD | 81.45 | 881.41 | Ly6e       |

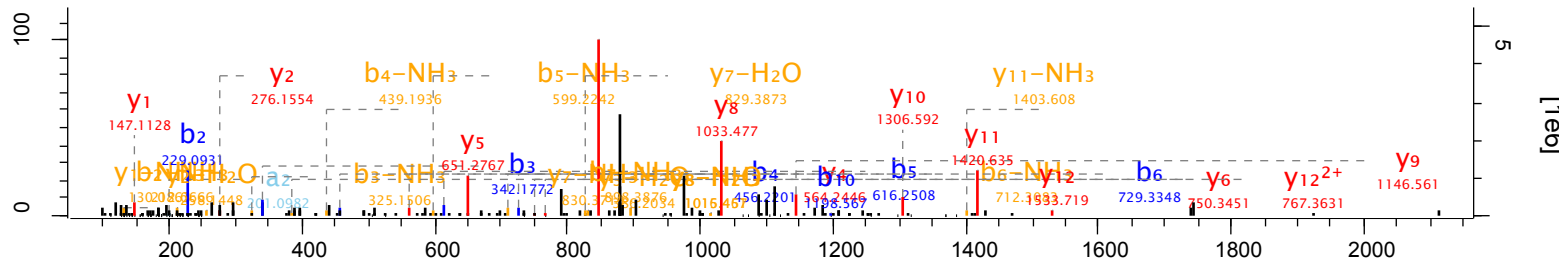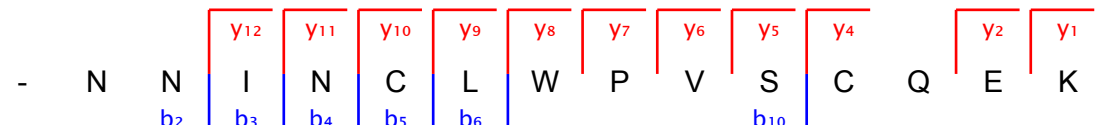

| Raw file                                   | Scan  | Method    | Score | m/z    | Gene names |
|--------------------------------------------|-------|-----------|-------|--------|------------|
| 20121216_EXQ1_AtDe_50CM_LFQ_myotubes_OG3_5 | 36136 | FTMS; HCD | 95.48 | 619.34 | Tmem69     |

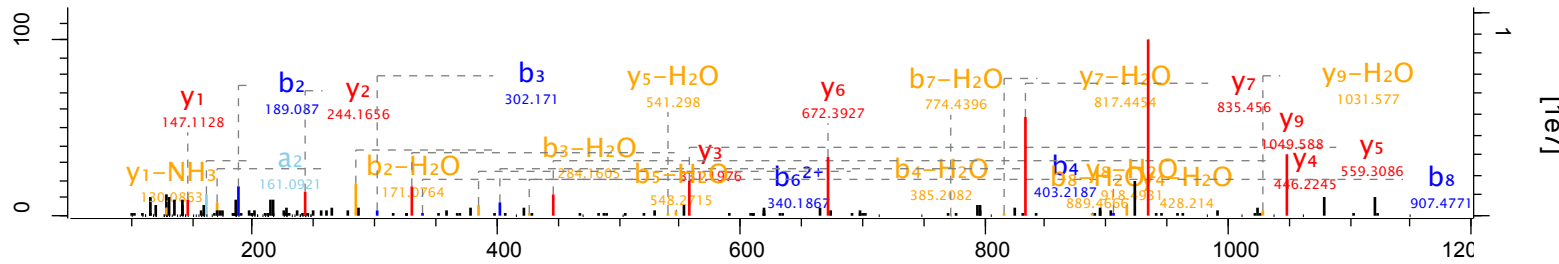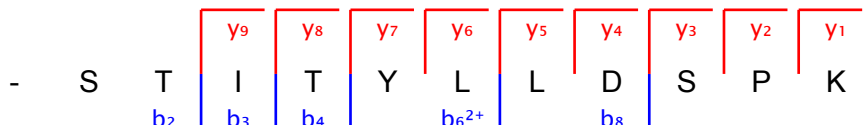

| Raw file                                   | Scan  | Method    | Score  | m/z    | Gene names |
|--------------------------------------------|-------|-----------|--------|--------|------------|
| 20121216_EXQ1_AtDe_50CM_LFQ_myotubes_OG3_5 | 36261 | FTMS; HCD | 196.84 | 881.41 | Ly6e       |

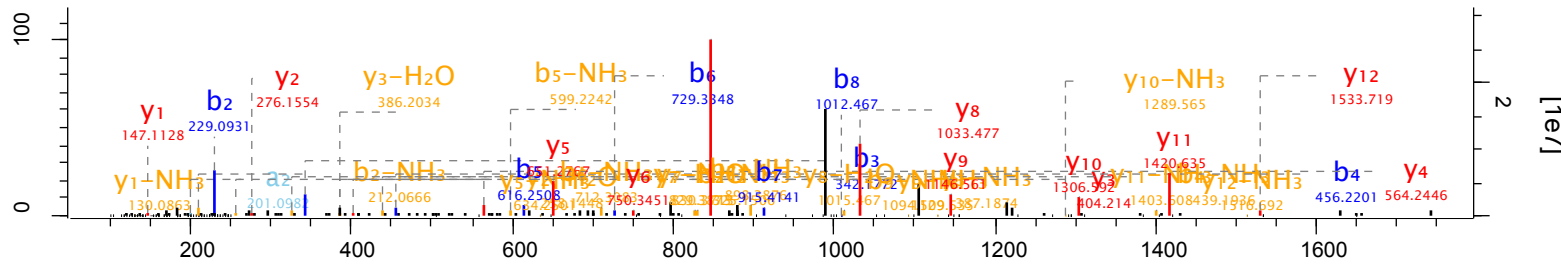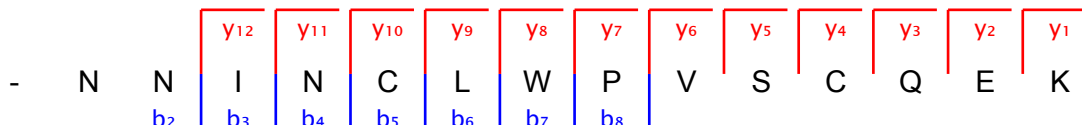

| Raw file                                   | Scan  | Method    | Score | m/z    | Gene names |
|--------------------------------------------|-------|-----------|-------|--------|------------|
| 20121216_EXQ1_AtDe_50CM_LFQ_myotubes_OG3_5 | 36421 | FTMS; HCD | 87.23 | 844.93 | H3f3c      |

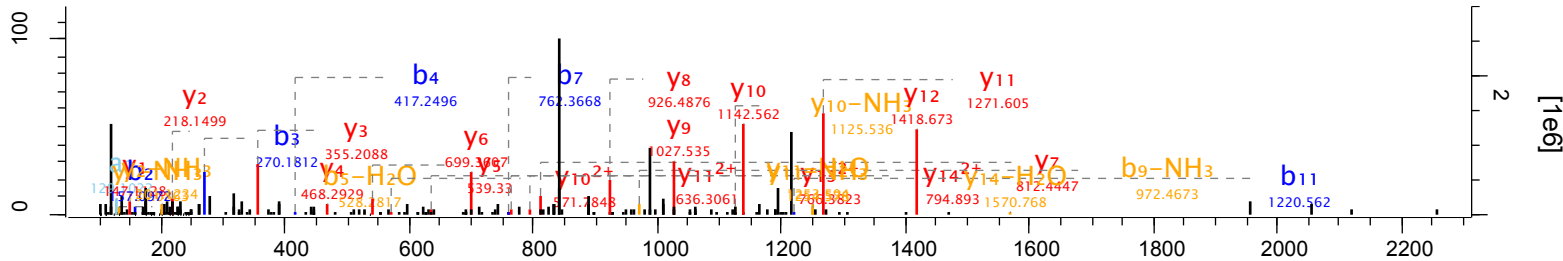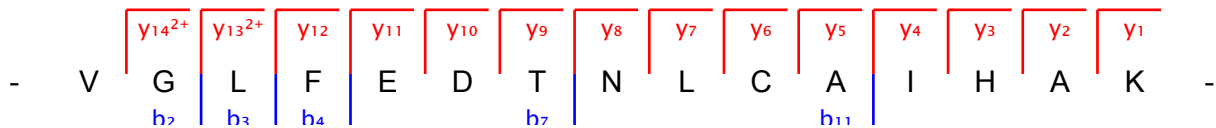

| Raw file                                   | Scan  | Method    | Score | m/z    | Gene names |
|--------------------------------------------|-------|-----------|-------|--------|------------|
| 20121216_EXQ1_AtDe_50CM_LFQ_myotubes_OG3_5 | 36573 | FTMS; HCD | 51.07 | 563.93 | Hnrnpa0    |

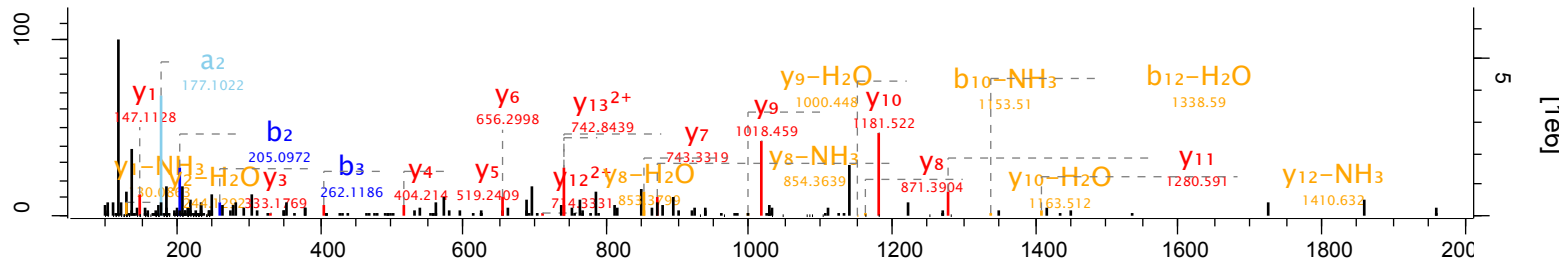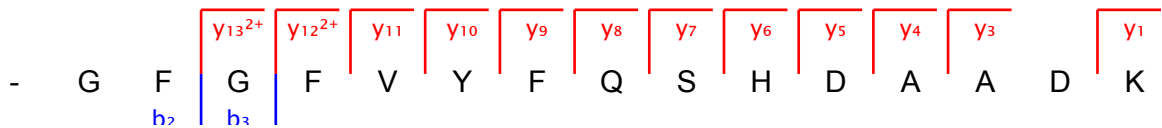

Raw file

20121216\_EXQ1\_AtDe\_50CM\_LFQ\_myotubes\_OG3\_5

Scan

37798

Method

FTMS; HCD

Score

69.82

m/z

482.79

Gene names

Plch1

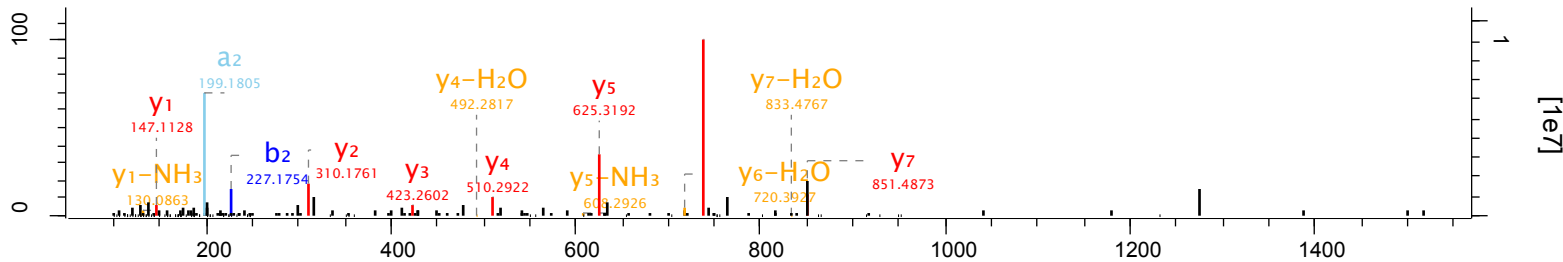

| Raw file                                   | Scan  | Method    | Score  | m/z    | Gene names |
|--------------------------------------------|-------|-----------|--------|--------|------------|
| 20121216_EXQ1_AtDe_50CM_LFQ_myotubes_OG3_5 | 37871 | FTMS; HCD | 122.74 | 964.57 | Plch1      |

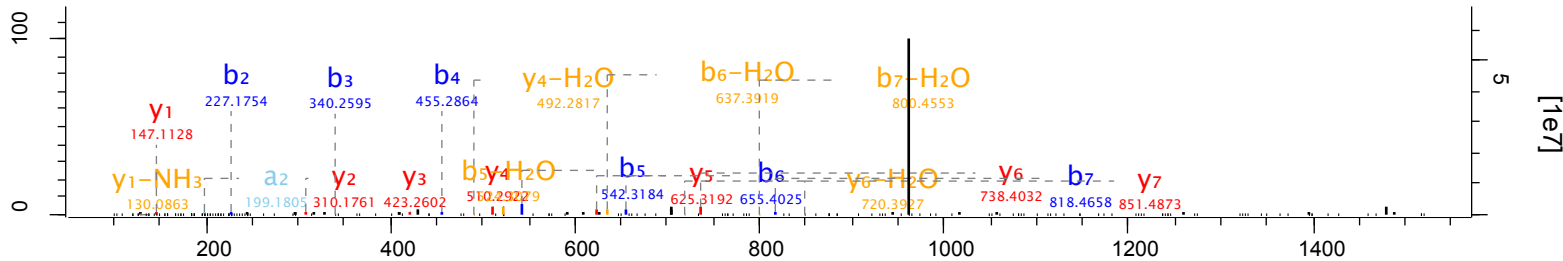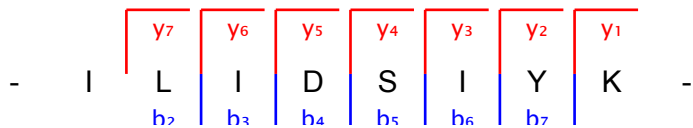



| Raw file                                   | Scan  | Method    | Score | m/z    | Gene names |
|--------------------------------------------|-------|-----------|-------|--------|------------|
| 20121216_EXQ1_AtDe_50CM_LFQ_myotubes_OG3_5 | 38458 | FTMS; HCD | 89.98 | 913.42 | Mob3c      |

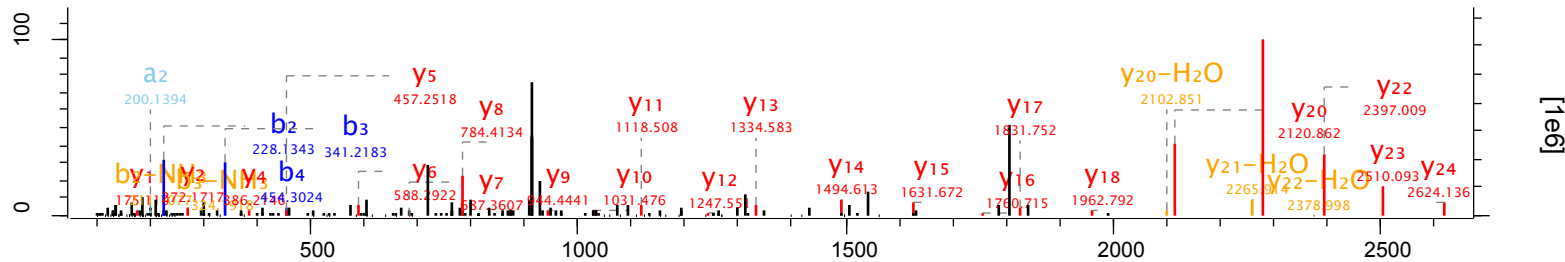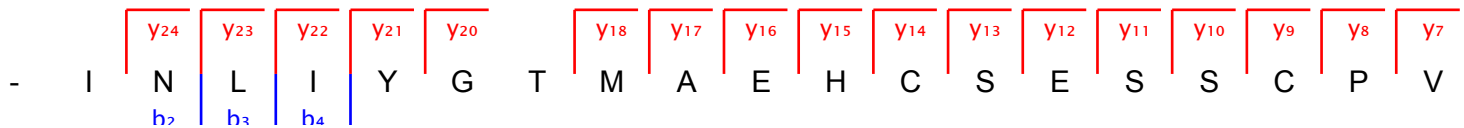

| Raw file                                   | Scan  | Method    | Score | m/z    | Gene names |
|--------------------------------------------|-------|-----------|-------|--------|------------|
| 20121216_EXQ1_AtDe_50CM_LFQ_myotubes_OG3_5 | 38472 | FTMS; HCD | 92.57 | 913.08 | Mob3c      |

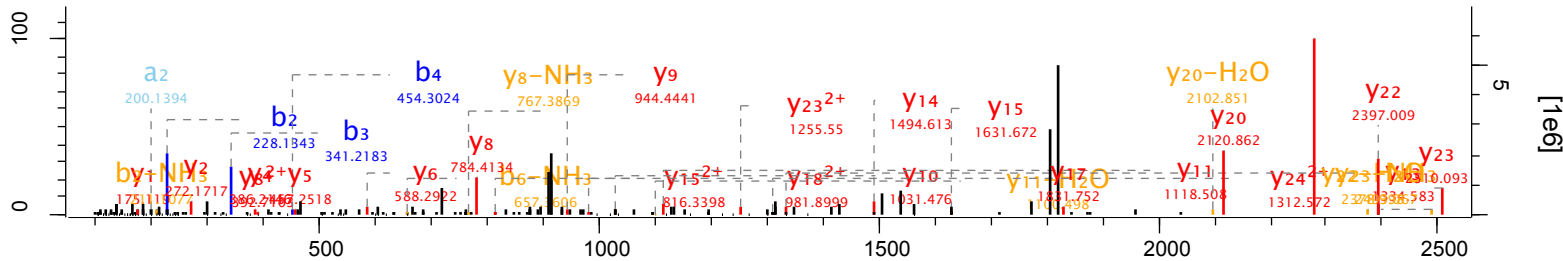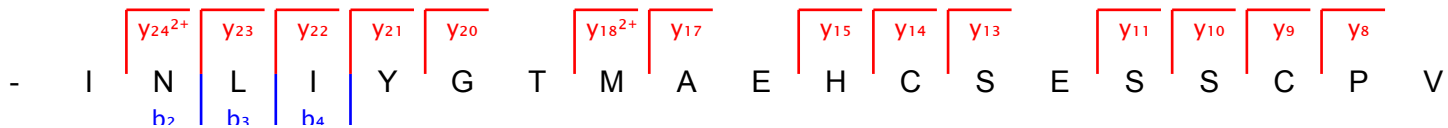

| Raw file                                   | Scan  | Method    | Score  | m/z     | Gene names |
|--------------------------------------------|-------|-----------|--------|---------|------------|
| 20121216_EXQ1_AtDe_50CM_LFQ_myotubes_OG3_5 | 40975 | FTMS; HCD | 191.64 | 1085.04 | Rgs2       |

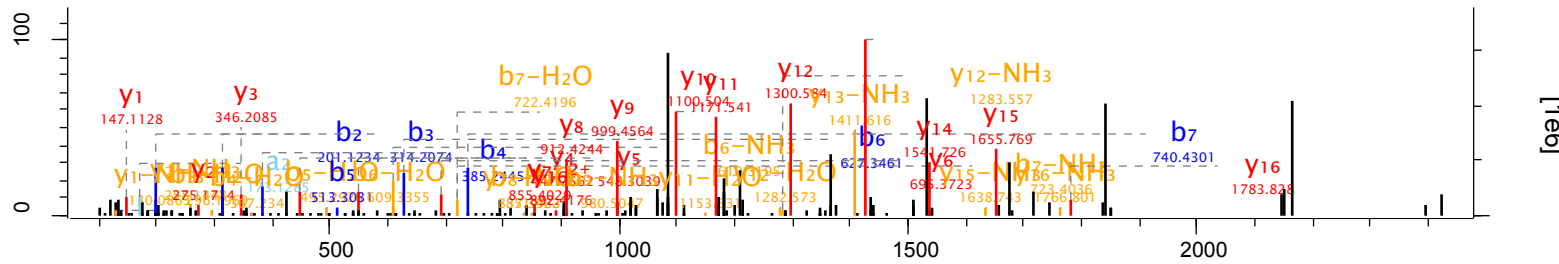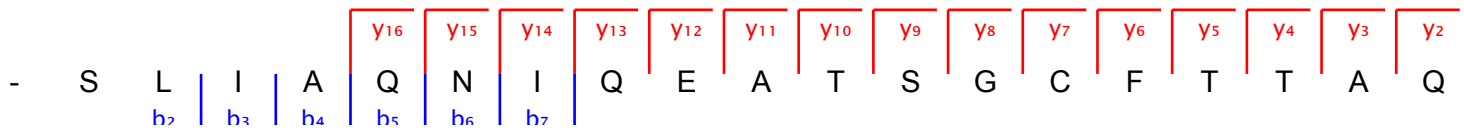

| Raw file                                   | Scan  | Method    | Score | m/z    | Gene names |
|--------------------------------------------|-------|-----------|-------|--------|------------|
| 20121216_EXQ1_AtDe_50CM_LFQ_myotubes_OG3_5 | 41034 | FTMS; HCD | 58.95 | 773.08 | Eme2       |

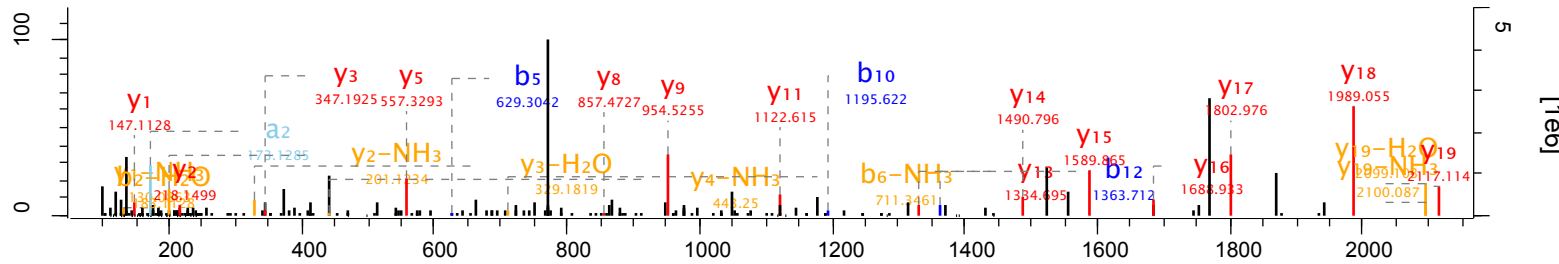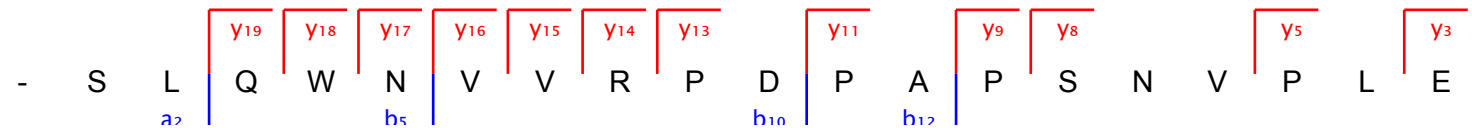

| Raw file                                   | Scan  | Method    | Score  | m/z    | Gene names |
|--------------------------------------------|-------|-----------|--------|--------|------------|
| 20121216_EXQ1_AtDe_50CM_LFQ_myotubes_OG3_5 | 41084 | FTMS; HCD | 112.58 | 765.37 | Cnih4      |

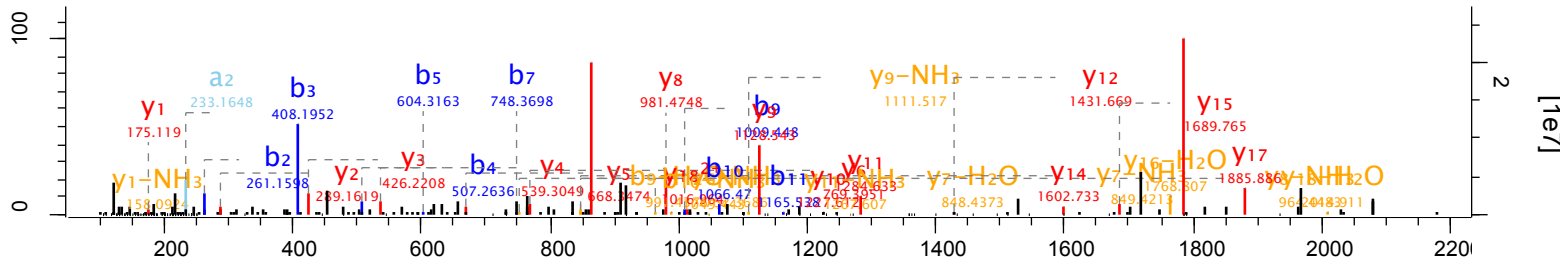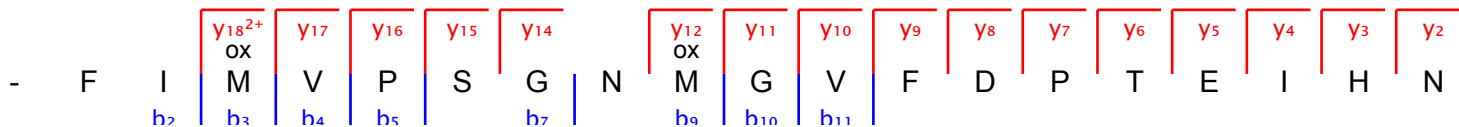

| Raw file                                   | Scan  | Method    | Score | m/z     | Gene names |
|--------------------------------------------|-------|-----------|-------|---------|------------|
| 20121216_EXQ1_AtDe_50CM_LFQ_myotubes_OG3_5 | 41097 | FTMS; HCD | 84.11 | 1147.55 | Cnih4      |

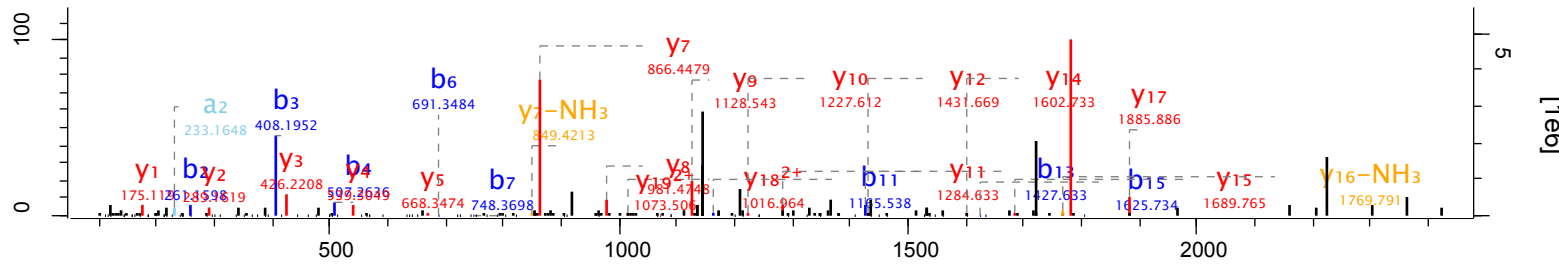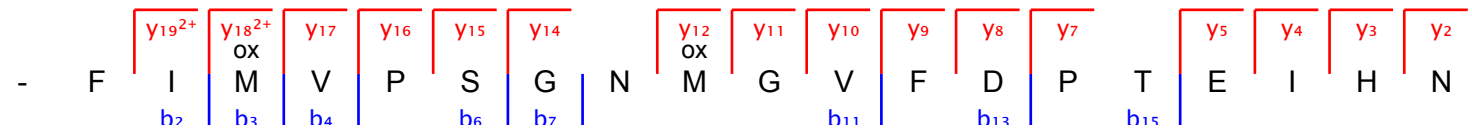

| Raw file                                   | Scan  | Method    | Score | m/z    | Gene names |
|--------------------------------------------|-------|-----------|-------|--------|------------|
| 20121216_EXQ1_AtDe_50CM_LFQ_myotubes_OG3_5 | 47449 | FTMS; HCD | 68.83 | 579.05 | Alkbh1     |

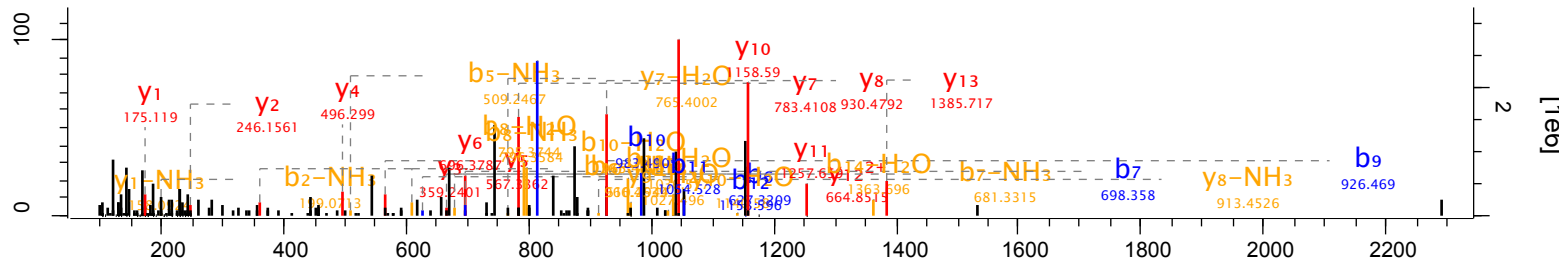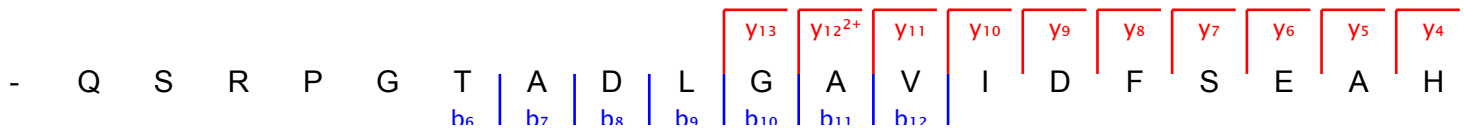

| Raw file                                   | Scan  | Method    | Score | m/z    | Gene names  |
|--------------------------------------------|-------|-----------|-------|--------|-------------|
| 20121216_EXQ1_AtDe_50CM_LFQ_myotubes_OG3_5 | 47474 | FTMS; HCD | 44.31 | 771.74 | Spr;Spr-ps1 |

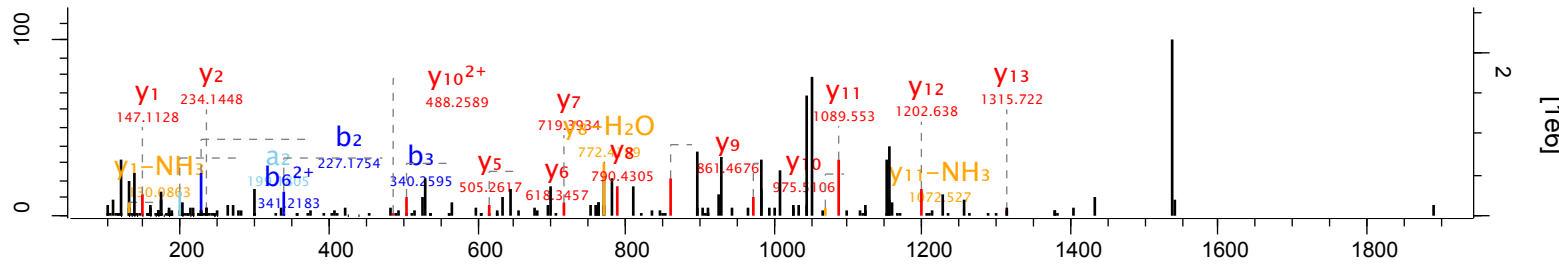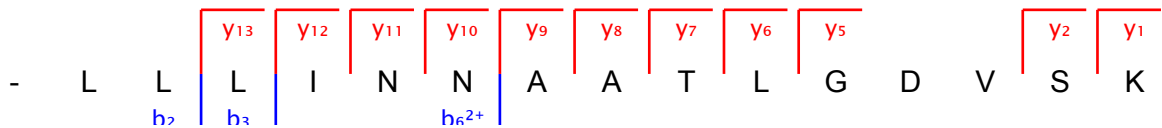



| Raw file                                   | Scan  | Method    | Score | m/z    | Gene names |
|--------------------------------------------|-------|-----------|-------|--------|------------|
| 20121216_EXQ1_AtDe_50CM_LFQ_myotubes_OG3_5 | 48530 | FTMS; HCD | 79.2  | 565.33 | Traf3ip1   |

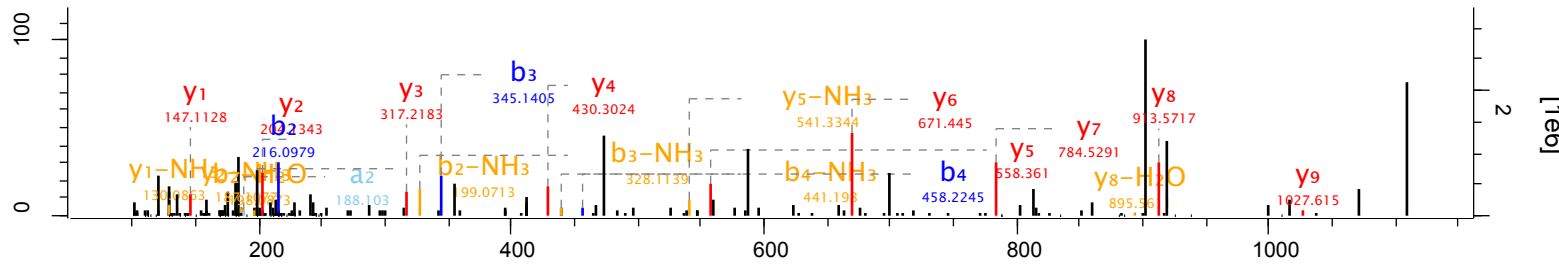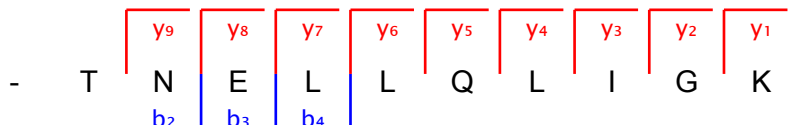

| Raw file                                   | Scan  | Method    | Score  | m/z    | Gene names |
|--------------------------------------------|-------|-----------|--------|--------|------------|
| 20121216_EXQ1_AtDe_50CM_LFQ_myotubes_OG3_5 | 49262 | FTMS; HCD | 130.05 | 760.04 | Cnih4      |

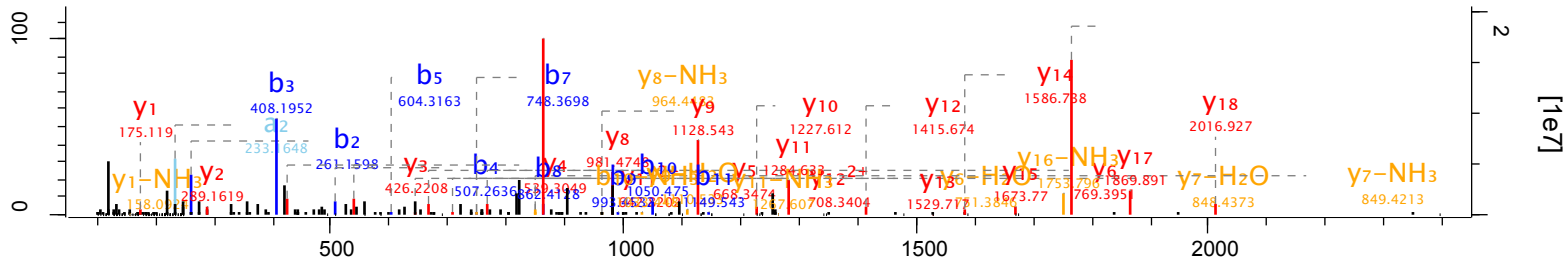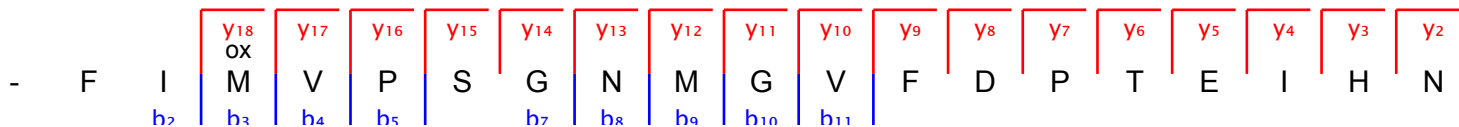

| Raw file                                   | Scan  | Method    | Score | m/z     | Gene names |
|--------------------------------------------|-------|-----------|-------|---------|------------|
| 20121216_EXQ1_AtDe_50CM_LFQ_myotubes_OG3_5 | 49287 | FTMS; HCD | 95.23 | 1139.54 | Cnih4      |

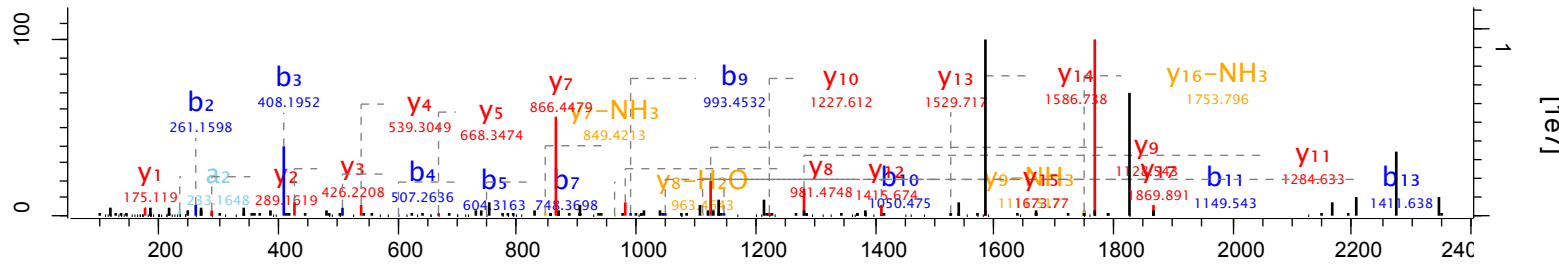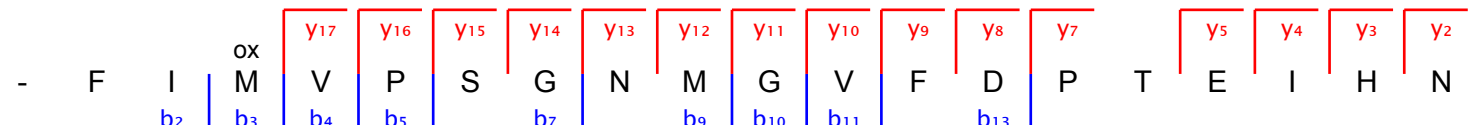

| Raw file                                   | Scan  | Method    | Score | m/z    | Gene names |
|--------------------------------------------|-------|-----------|-------|--------|------------|
| 20121216_EXQ1_AtDe_50CM_LFQ_myotubes_OG3_5 | 49595 | FTMS; HCD | 89.23 | 674.86 | Galnt18    |

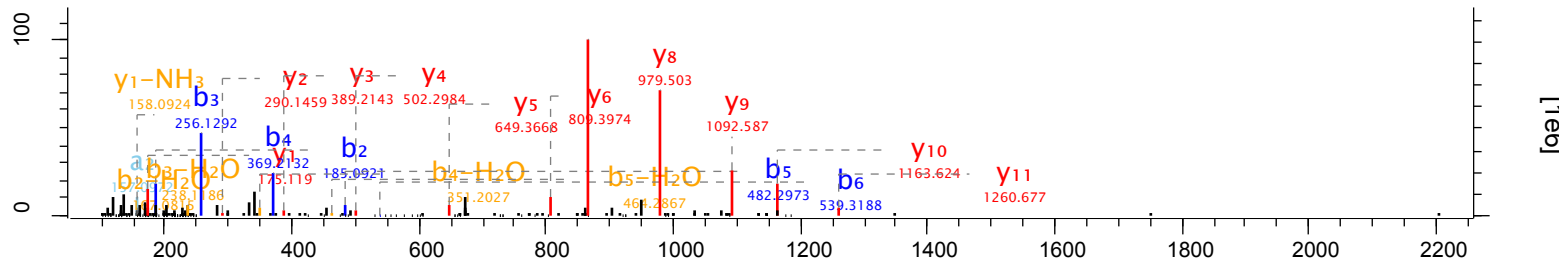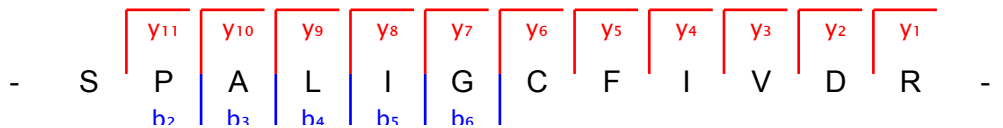

| Raw file                                   | Scan  | Method    | Score  | m/z    | Gene names |
|--------------------------------------------|-------|-----------|--------|--------|------------|
| 20121216_EXQ1_AtDe_50CM_LFQ_myotubes_OG3_5 | 51345 | FTMS; HCD | 163.39 | 992.19 | Bad        |

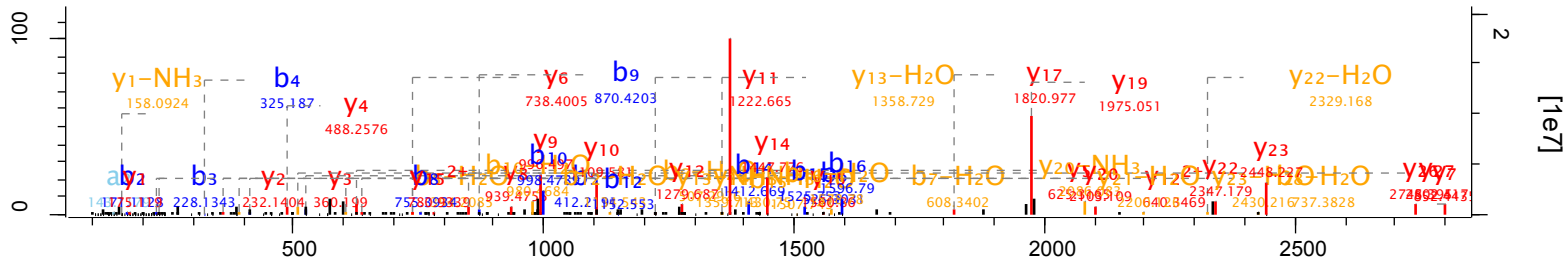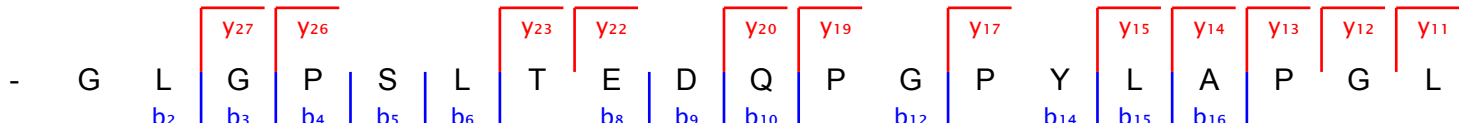



| Raw file                                   | Scan  | Method    | Score  | m/z    | Gene names |
|--------------------------------------------|-------|-----------|--------|--------|------------|
| 20121216_EXQ1_AtDe_50CM_LFQ_myotubes_OG3_5 | 52340 | FTMS; HCD | 157.22 | 755.04 | Cnih4      |

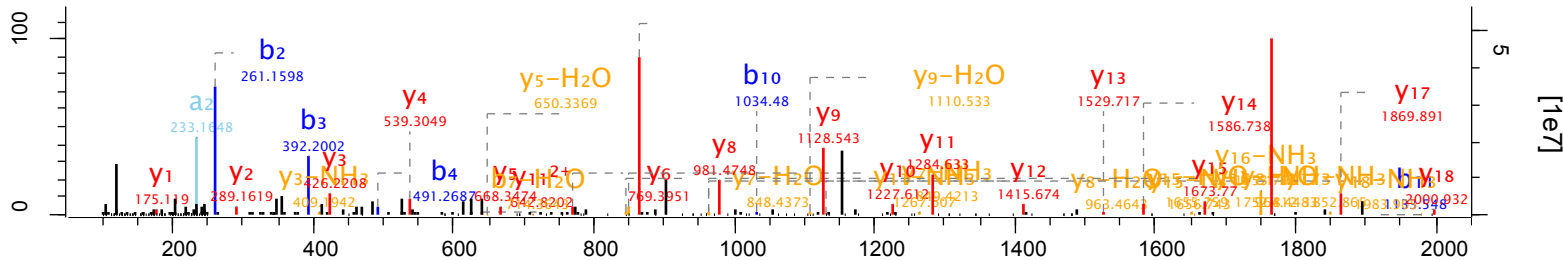

Sequence alignment showing amino acid residues and corresponding ion labels:

F I M V P S G N M G V F D P T E I H N

Ion labels (b-ions in blue, y-ions in red) are shown above and below the sequence:

- Blue labels below: b2 (under I), b3 (under M), b4 (under V), b10 (under G), b11 (under V)
- Red labels above: y18 (under M), y17 (under V), y16 (under P), y15 (under S), y14 (under G), y13 (under N), y12 (under M), y11 (under G), y10 (under V), y9 (under F), y8 (under D), y7 (under P), y6 (under T), y5 (under E), y4 (under I), y3 (under H), y2 (under N)

| Raw file                                   | Scan  | Method    | Score  | m/z    | Gene names |
|--------------------------------------------|-------|-----------|--------|--------|------------|
| 20121216_EXQ1_AtDe_50CM_LFQ_myotubes_OG3_5 | 52375 | FTMS; HCD | 114.99 | 566.28 | Cnih4      |

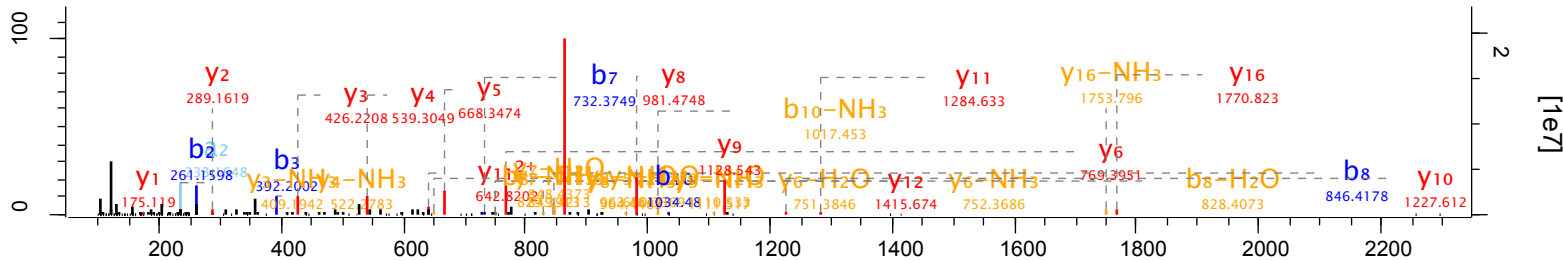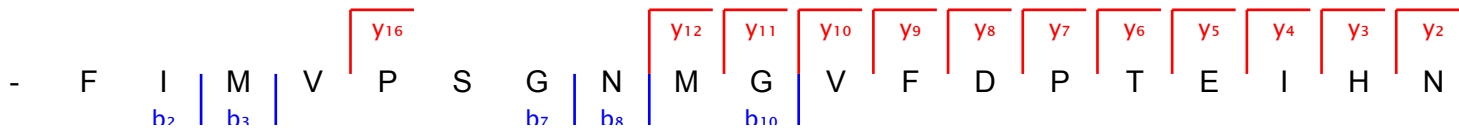



| Raw file                                   | Scan  | Method    | Score  | m/z     | Gene names |
|--------------------------------------------|-------|-----------|--------|---------|------------|
| 20121216_EXQ1_AtDe_50CM_LFQ_myotubes_OG3_5 | 52469 | FTMS; HCD | 178.03 | 1131.05 | Cnih4      |

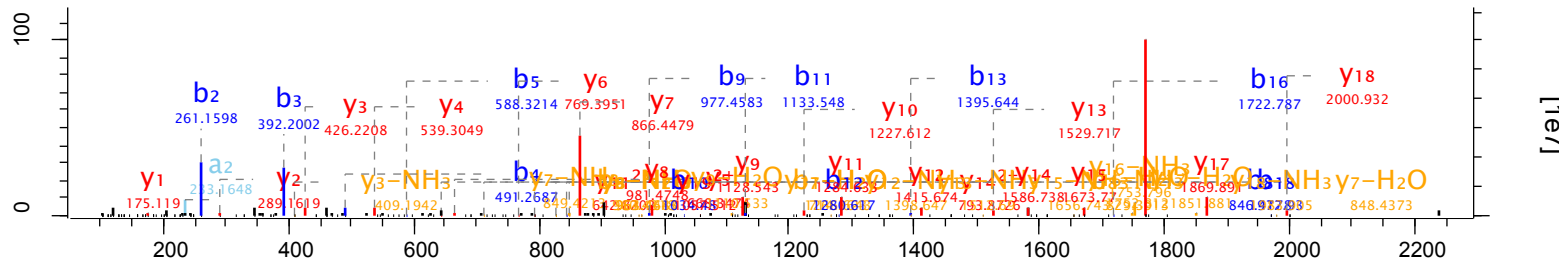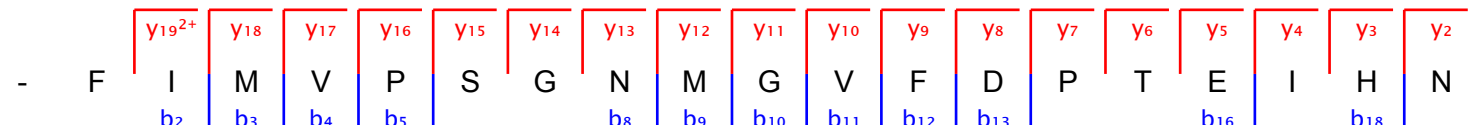

| Raw file                                   | Scan  | Method    | Score  | m/z    | Gene names |
|--------------------------------------------|-------|-----------|--------|--------|------------|
| 20121216_EXQ1_AtDe_50CM_LFQ_myotubes_OG3_5 | 52898 | FTMS; HCD | 128.98 | 690.37 | Omd        |

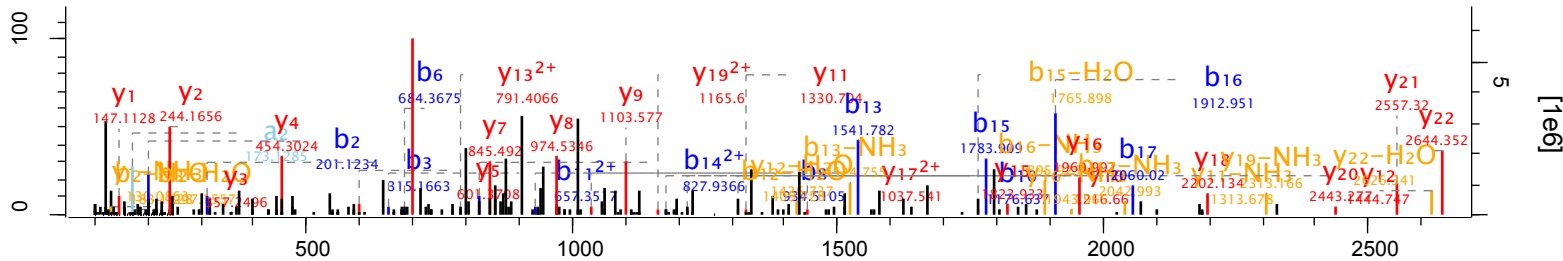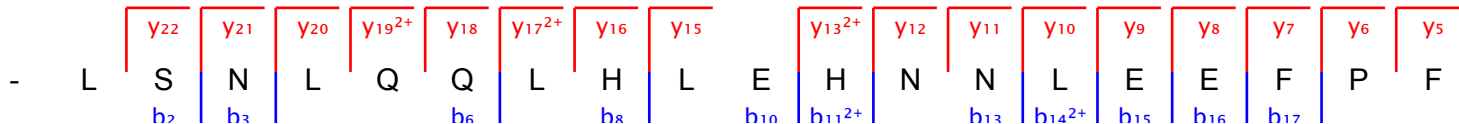

| Raw file                                   | Scan  | Method    | Score  | m/z    | Gene names |
|--------------------------------------------|-------|-----------|--------|--------|------------|
| 20121216_EXQ1_AtDe_50CM_LFQ_myotubes_OG3_5 | 52914 | FTMS; HCD | 167.95 | 919.82 | Omd        |

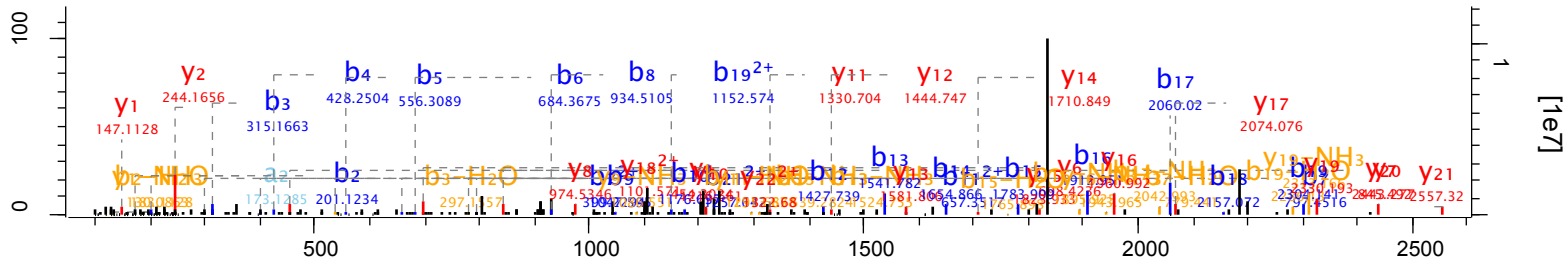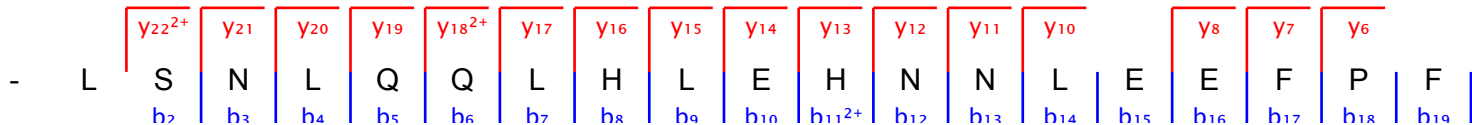

| Raw file                                   | Scan  | Method    | Score | m/z    | Gene names |
|--------------------------------------------|-------|-----------|-------|--------|------------|
| 20121216_EXQ1_AtDe_50CM_LFQ_myotubes_OG3_5 | 52932 | FTMS; HCD | 129.2 | 971.05 | Evi2a      |

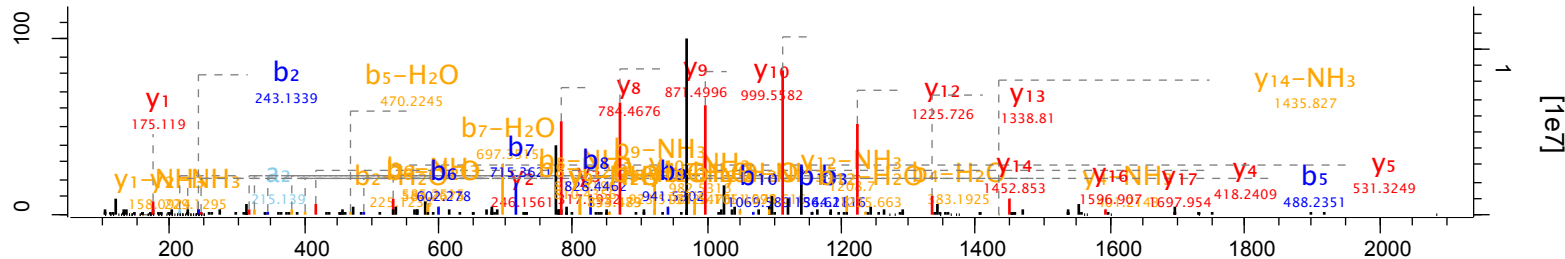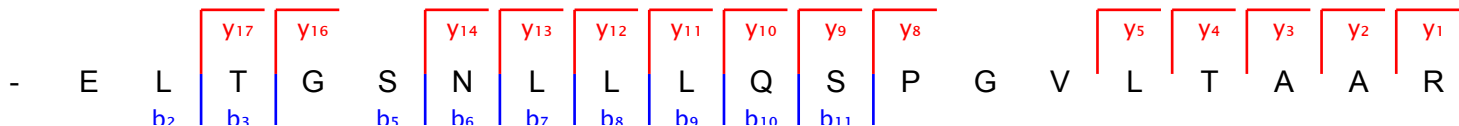

| Raw file                                   | Scan  | Method    | Score  | m/z | Gene names |
|--------------------------------------------|-------|-----------|--------|-----|------------|
| 20121216_EXQ1_AtDe_50CM_LFQ_myotubes_OG3_5 | 53795 | FTMS; HCD | 141.73 | 553 | Xaf1       |

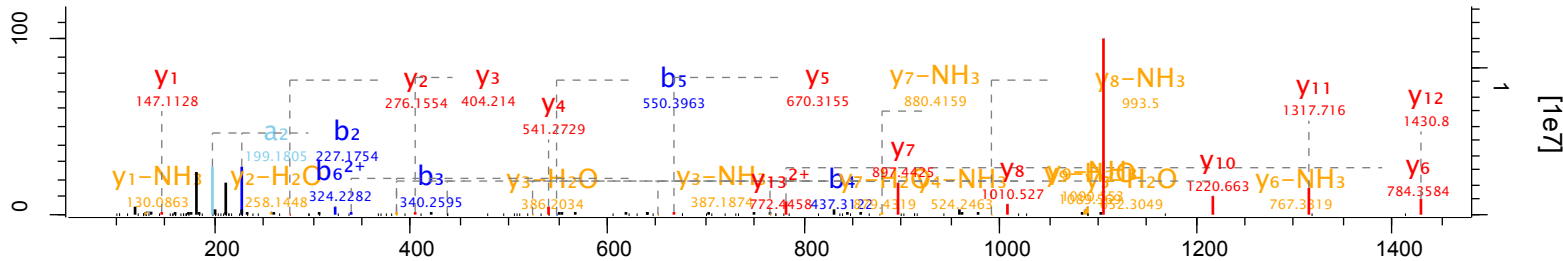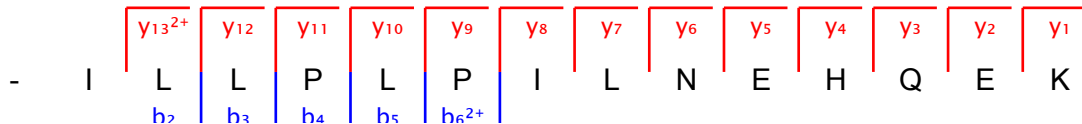

| Raw file                                   | Scan  | Method    | Score  | m/z    | Gene names |
|--------------------------------------------|-------|-----------|--------|--------|------------|
| 20121216_EXQ1_AtDe_50CM_LFQ_myotubes_OG3_5 | 55998 | FTMS; HCD | 102.87 | 666.89 | Nkiras1    |

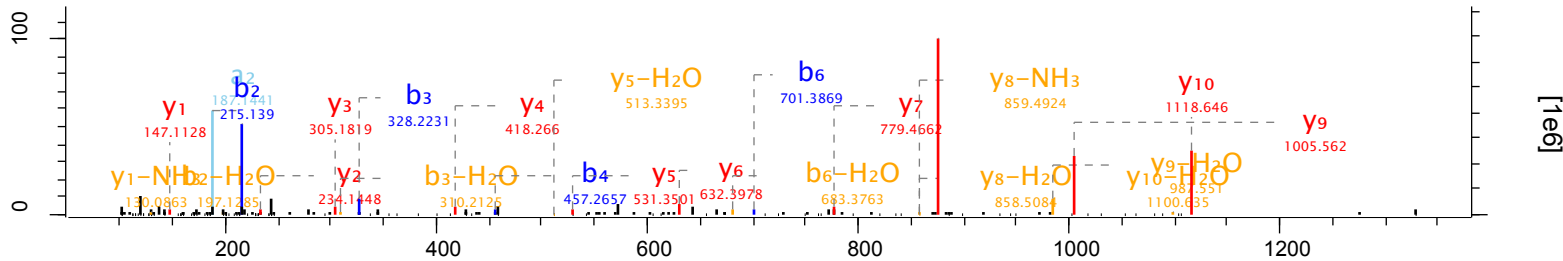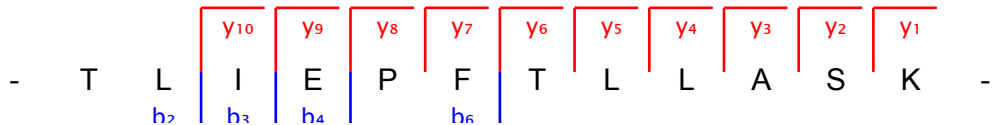

| Raw file                                   | Scan  | Method    | Score | m/z    | Gene names |
|--------------------------------------------|-------|-----------|-------|--------|------------|
| 20121216_EXQ1_AtDe_50CM_LFQ_myotubes_OG3_5 | 56735 | FTMS; HCD | 60.55 | 574.32 | Panx1      |

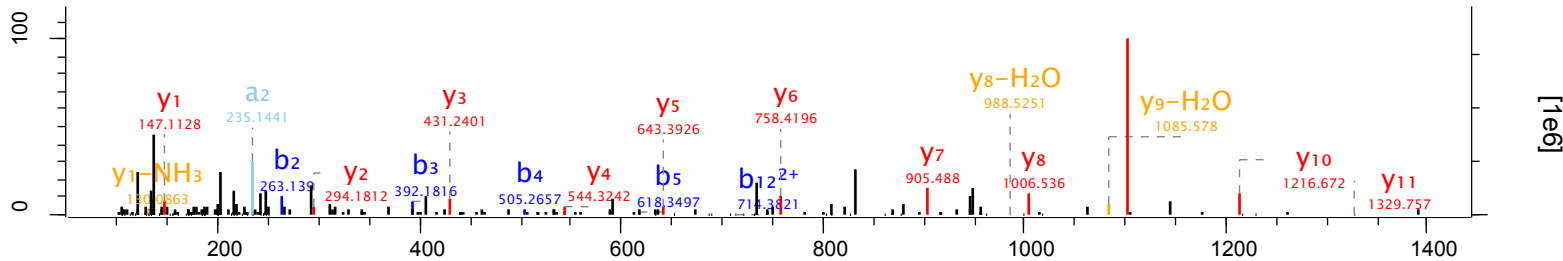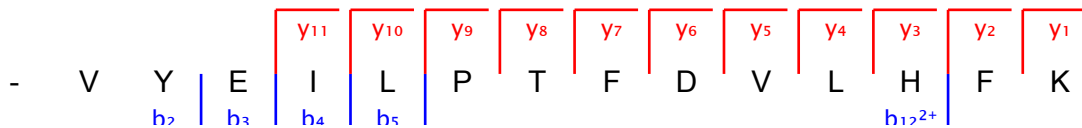

| Raw file                                   | Scan  | Method    | Score  | m/z    | Gene names |
|--------------------------------------------|-------|-----------|--------|--------|------------|
| 20121216_EXQ1_AtDe_50CM_LFQ_myotubes_OG3_5 | 57496 | FTMS; HCD | 108.53 | 715.91 | Uqcr11     |

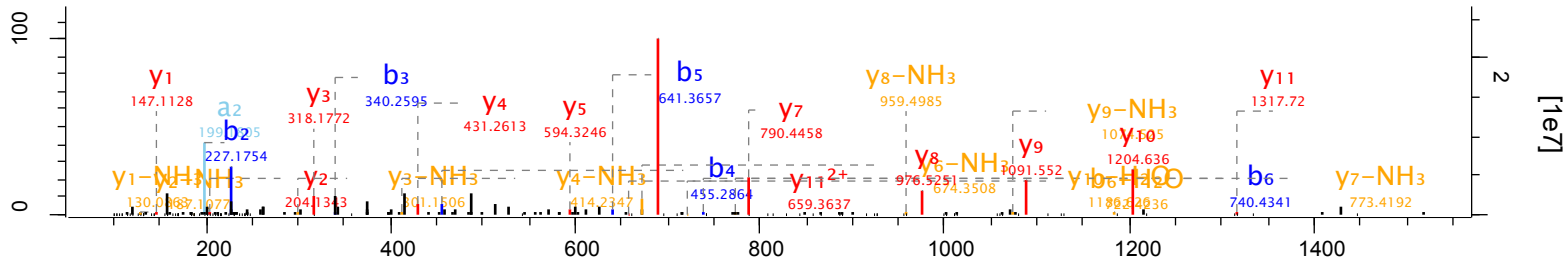



| Raw file                                   | Scan  | Method    | Score  | m/z    | Gene names |
|--------------------------------------------|-------|-----------|--------|--------|------------|
| 20121216_EXQ1_AtDe_50CM_LFQ_myotubes_OG3_5 | 57862 | FTMS; HCD | 156.49 | 620.02 | Gipc2      |

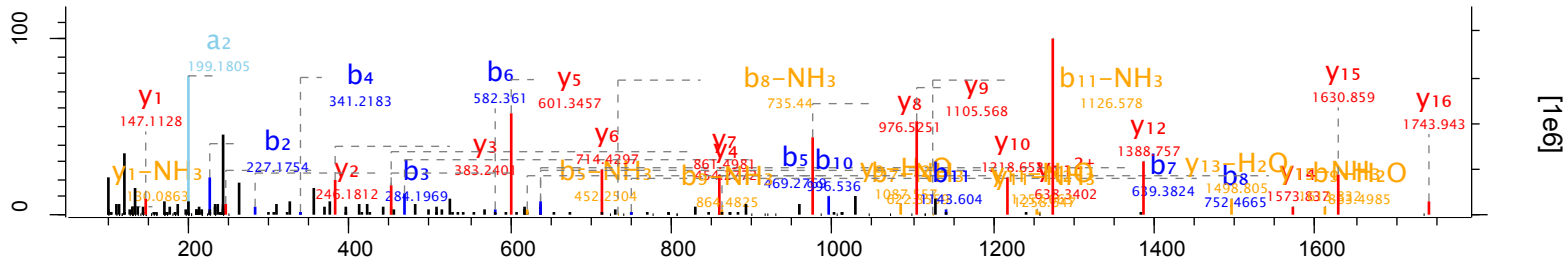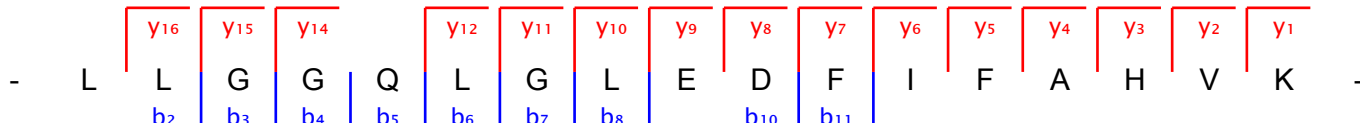

| Raw file                                   | Scan  | Method    | Score  | m/z    | Gene names |
|--------------------------------------------|-------|-----------|--------|--------|------------|
| 20121216_EXQ1_AtDe_50CM_LFQ_myotubes_OG3_5 | 57895 | FTMS; HCD | 173.51 | 929.52 | Gipc2      |

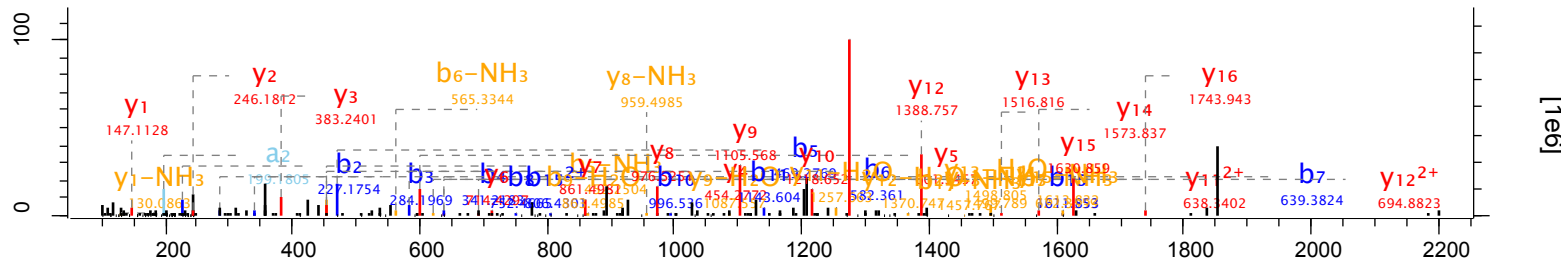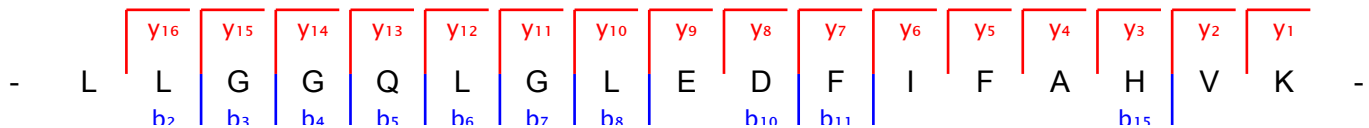

| Raw file                                   | Scan  | Method    | Score  | m/z    | Gene names |
|--------------------------------------------|-------|-----------|--------|--------|------------|
| 20121216_EXQ1_AtDe_50CM_LFQ_myotubes_OG3_5 | 57941 | FTMS; HCD | 101.56 | 708.89 | Tmem234    |

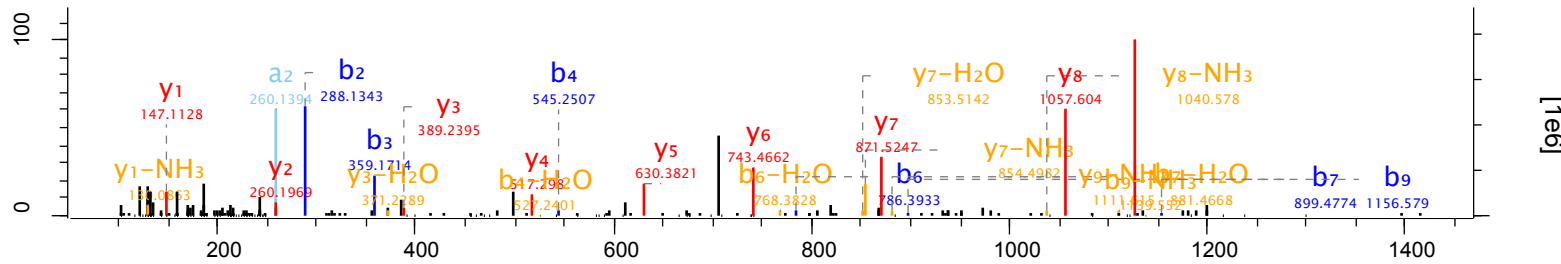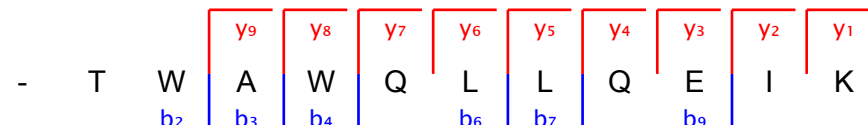

| Raw file                                   | Scan  | Method    | Score  | m/z    | Gene names |
|--------------------------------------------|-------|-----------|--------|--------|------------|
| 20121216_EXQ1_AtDe_50CM_LFQ_myotubes_OG3_5 | 60968 | FTMS; HCD | 110.74 | 992.08 | Slc50a1    |

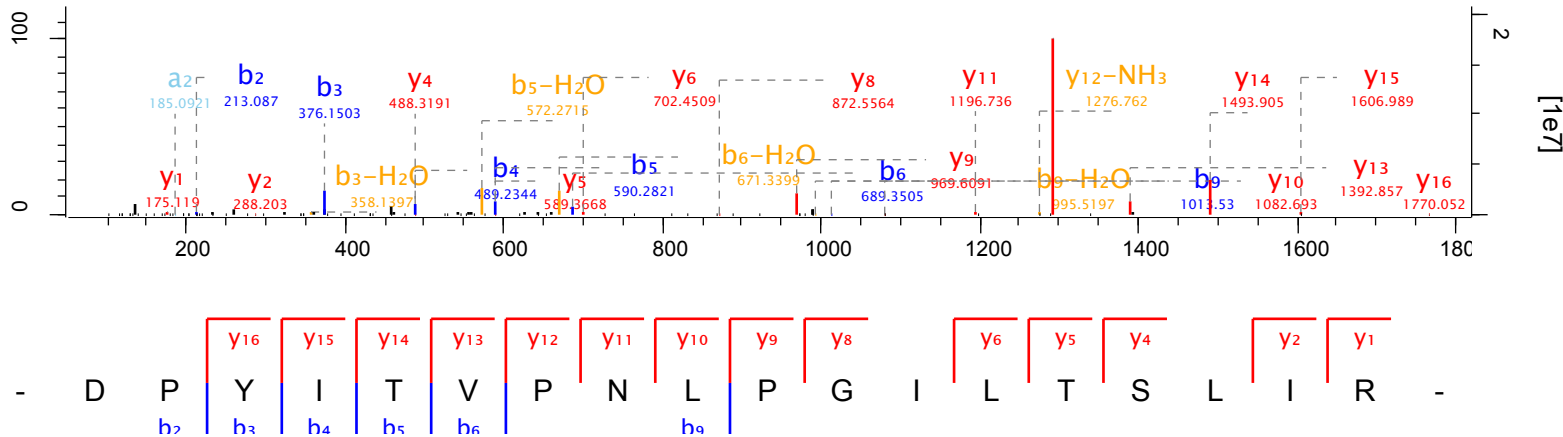

| Raw file                                   | Scan  | Method    | Score | m/z    | Gene names |
|--------------------------------------------|-------|-----------|-------|--------|------------|
| 20121216_EXQ1_AtDe_50CM_LFQ_myotubes_OG3_5 | 60984 | FTMS; HCD | 73.14 | 661.39 | Slc50a1    |

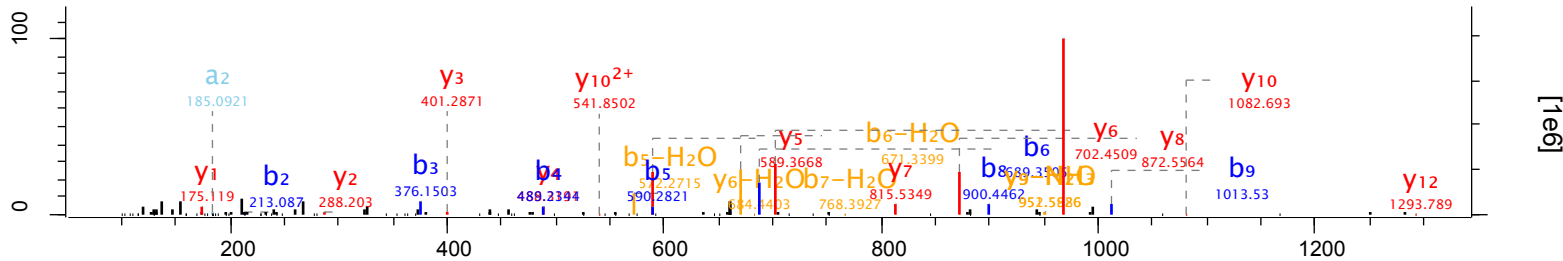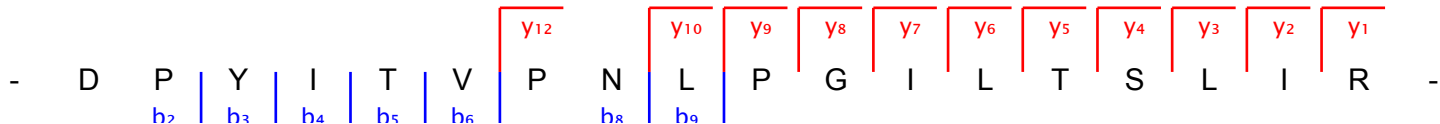

| Raw file                                   | Scan  | Method    | Score | m/z    | Gene names |
|--------------------------------------------|-------|-----------|-------|--------|------------|
| 20121216_EXQ1_AtDe_50CM_LFQ_myotubes_OG3_6 | 11939 | FTMS; HCD | 78.34 | 401.88 | Pkd111     |

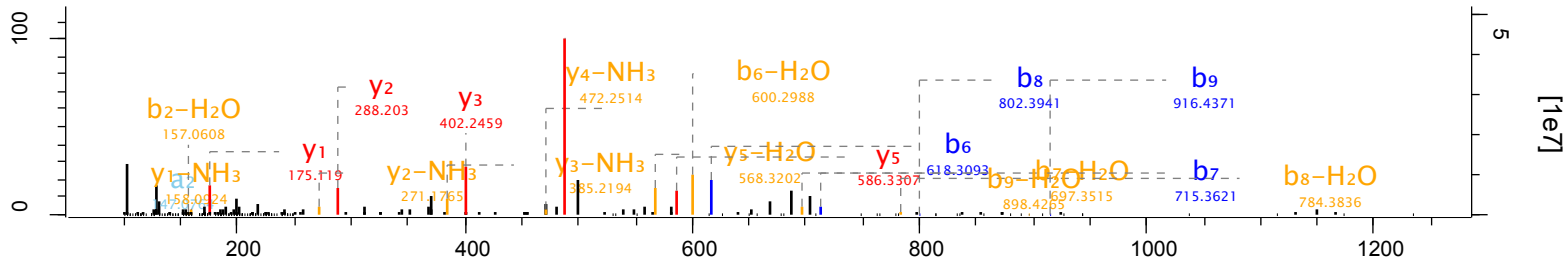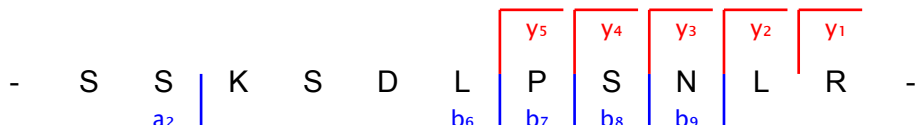

| Raw file                                   | Scan  | Method    | Score | m/z    | Gene names |
|--------------------------------------------|-------|-----------|-------|--------|------------|
| 20121216_EXQ1_AtDe_50CM_LFQ_myotubes_OG3_6 | 15761 | FTMS; HCD | 72.23 | 482.73 | Cdc42se1   |

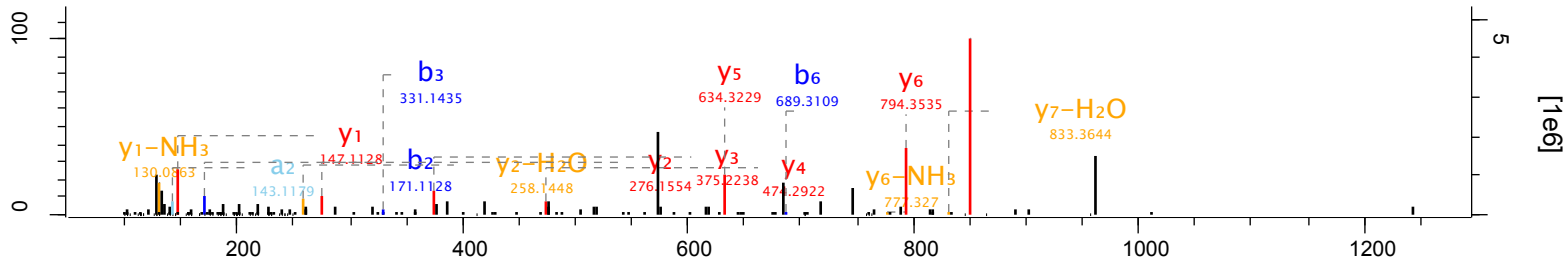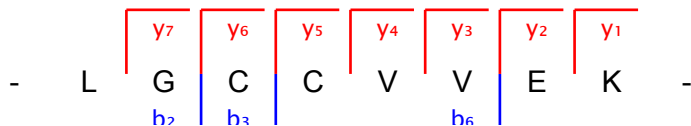

| Raw file                                   | Scan  | Method    | Score  | m/z    | Gene names |
|--------------------------------------------|-------|-----------|--------|--------|------------|
| 20121216_EXQ1_AtDe_50CM_LFQ_myotubes_OG3_6 | 16181 | FTMS; HCD | 116.58 | 724.37 | Rad51d     |

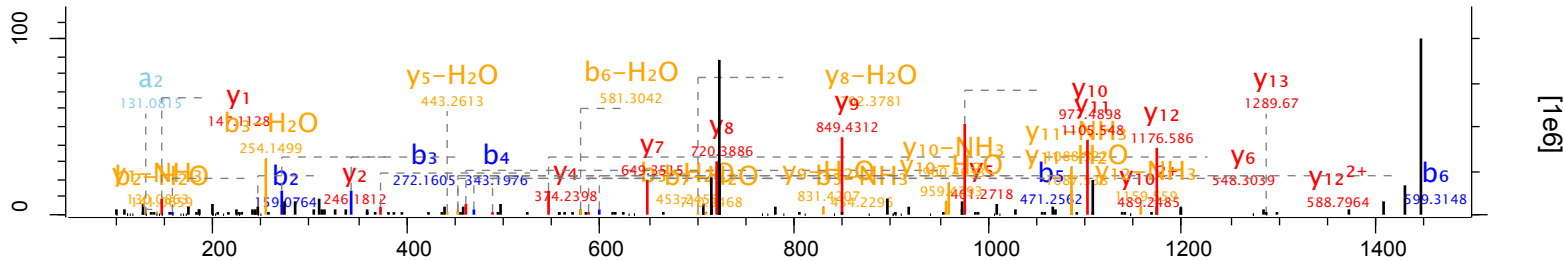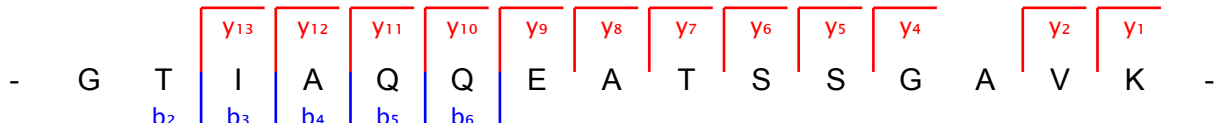



| Raw file                                   | Scan  | Method    | Score | m/z    | Gene names |
|--------------------------------------------|-------|-----------|-------|--------|------------|
| 20121216_EXQ1_AtDe_50CM_LFQ_myotubes_OG3_6 | 28159 | FTMS; HCD | 172.1 | 720.39 | Mfsd7b     |

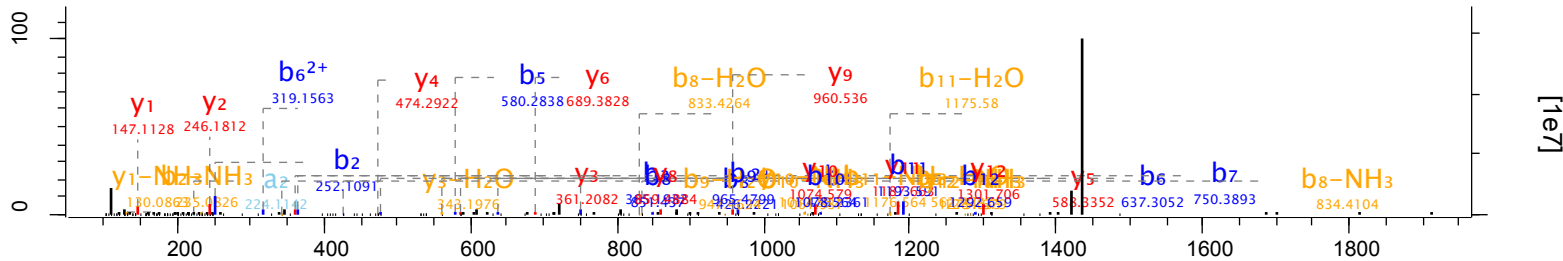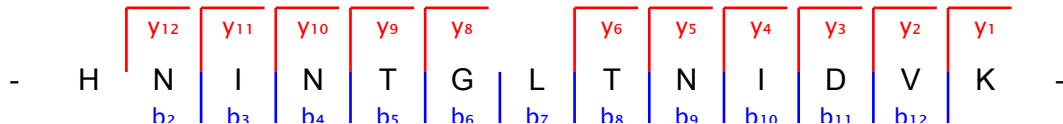

| Raw file                                   | Scan  | Method    | Score  | m/z    | Gene names |
|--------------------------------------------|-------|-----------|--------|--------|------------|
| 20121216_EXQ1_AtDe_50CM_LFQ_myotubes_OG3_6 | 30172 | FTMS; HCD | 128.61 | 705.88 | Vkorc1     |

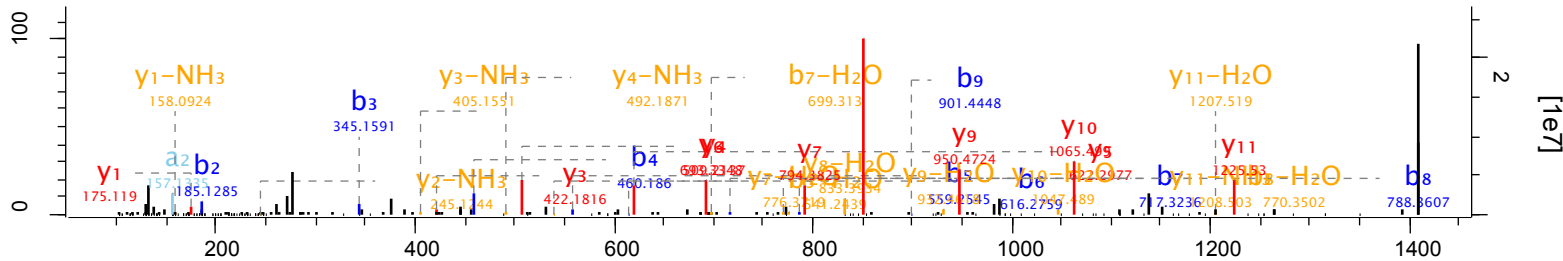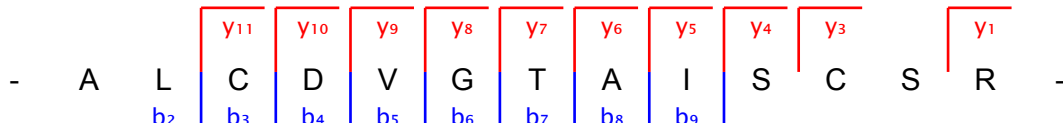

| Raw file                                   | Scan  | Method    | Score  | m/z    | Gene names |
|--------------------------------------------|-------|-----------|--------|--------|------------|
| 20121216_EXQ1_AtDe_50CM_LFQ_myotubes_OG3_6 | 31445 | FTMS; HCD | 121.31 | 476.24 | Mapk15     |

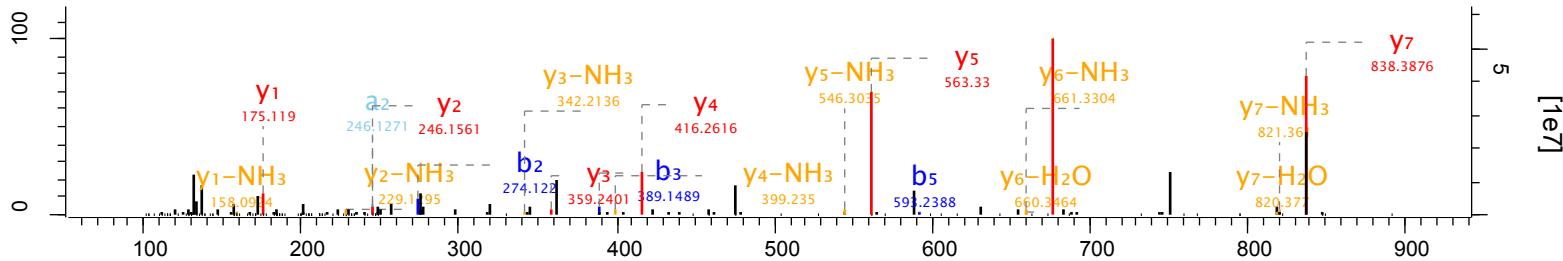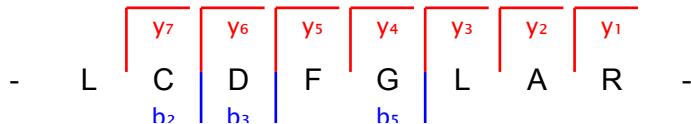

| Raw file                                   | Scan  | Method    | Score | m/z    | Gene names |
|--------------------------------------------|-------|-----------|-------|--------|------------|
| 20121216_EXQ1_AtDe_50CM_LFQ_myotubes_OG3_6 | 36510 | FTMS; HCD | 76.36 | 832.41 | Nus1       |

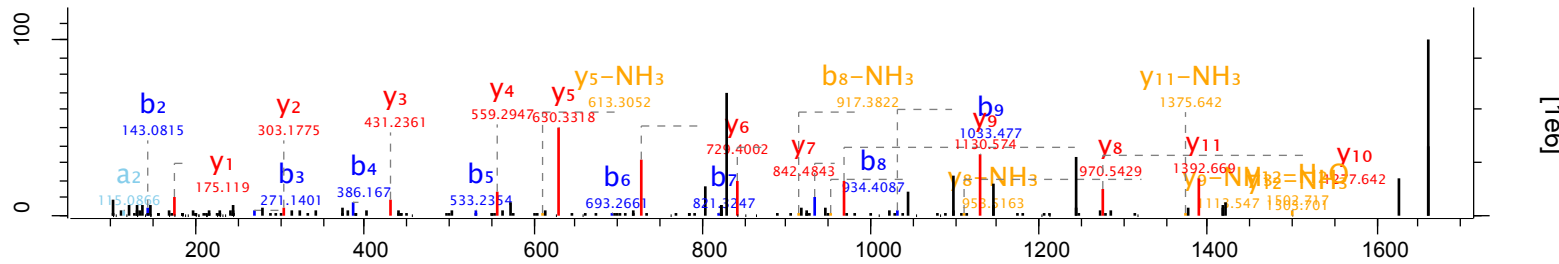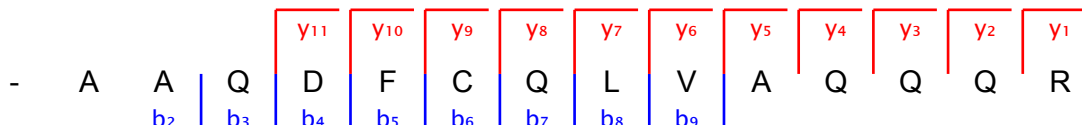

| Raw file                                   | Scan  | Method    | Score | m/z    | Gene names |
|--------------------------------------------|-------|-----------|-------|--------|------------|
| 20121216_EXQ1_AtDe_50CM_LFQ_myotubes_OG3_6 | 38600 | FTMS; HCD | 65.33 | 686.38 | Id3        |

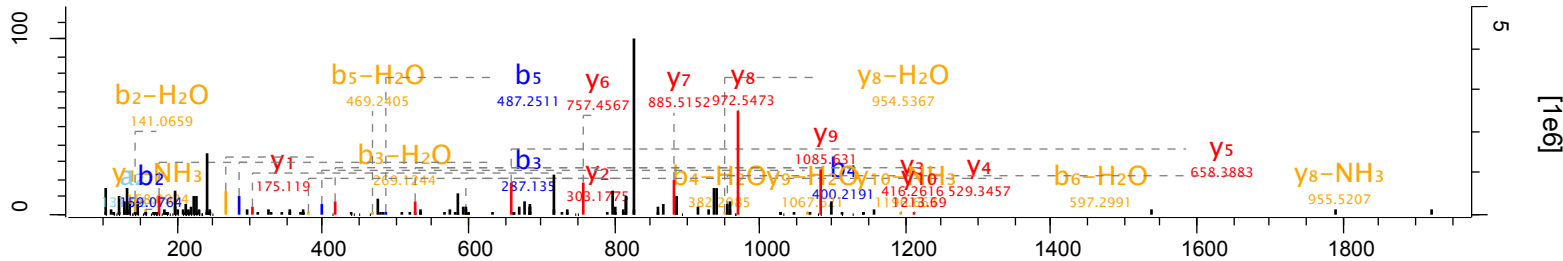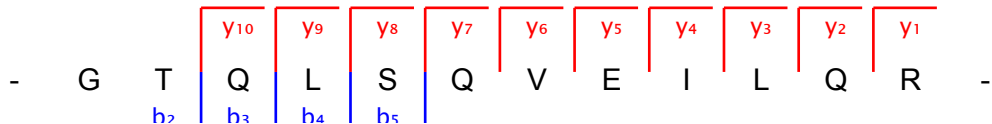

| Raw file                                   | Scan  | Method    | Score | m/z   | Gene names |
|--------------------------------------------|-------|-----------|-------|-------|------------|
| 20121216_EXQ1_AtDe_50CM_LFQ_myotubes_OG3_6 | 40832 | FTMS; HCD | 83.62 | 684.4 | Ctrb1      |

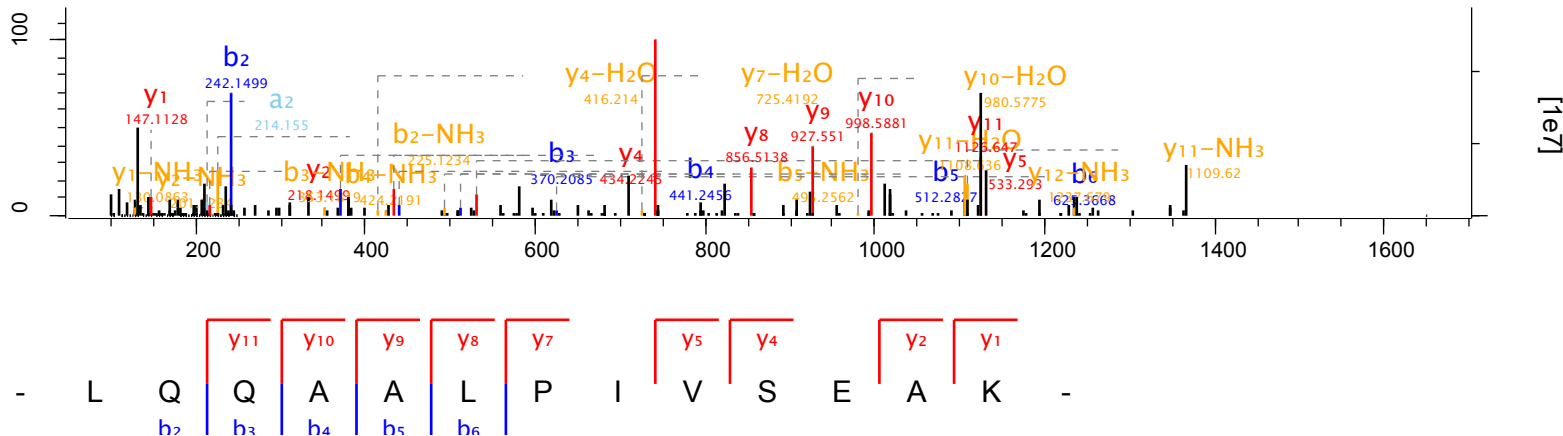

| Raw file                                   | Scan  | Method    | Score | m/z    | Gene names |
|--------------------------------------------|-------|-----------|-------|--------|------------|
| 20121216_EXQ1_AtDe_50CM_LFQ_myotubes_OG3_6 | 40858 | FTMS; HCD | 96.96 | 566.82 | Cenpp      |

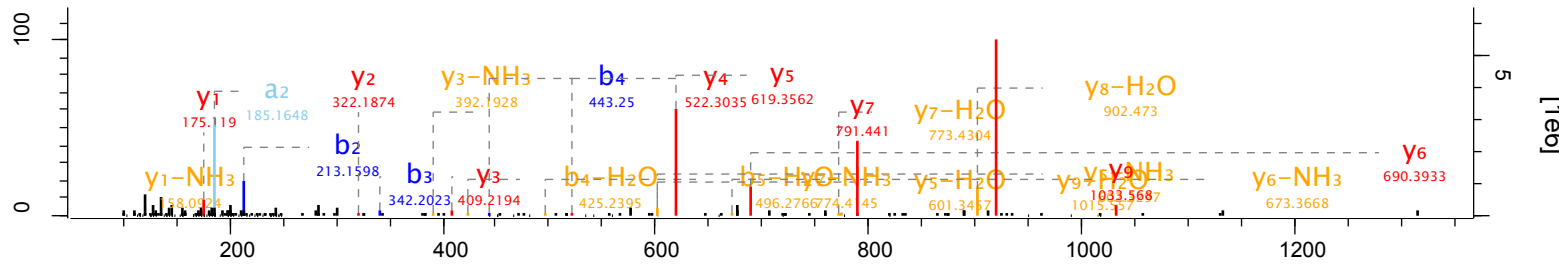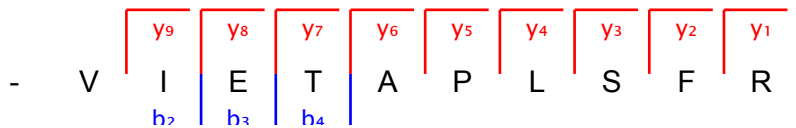

| Raw file                                   | Scan  | Method    | Score  | m/z    | Gene names |
|--------------------------------------------|-------|-----------|--------|--------|------------|
| 20121216_EXQ1_AtDe_50CM_LFQ_myotubes_OG3_6 | 41537 | FTMS; HCD | 191.24 | 716.34 | Ndufa1     |

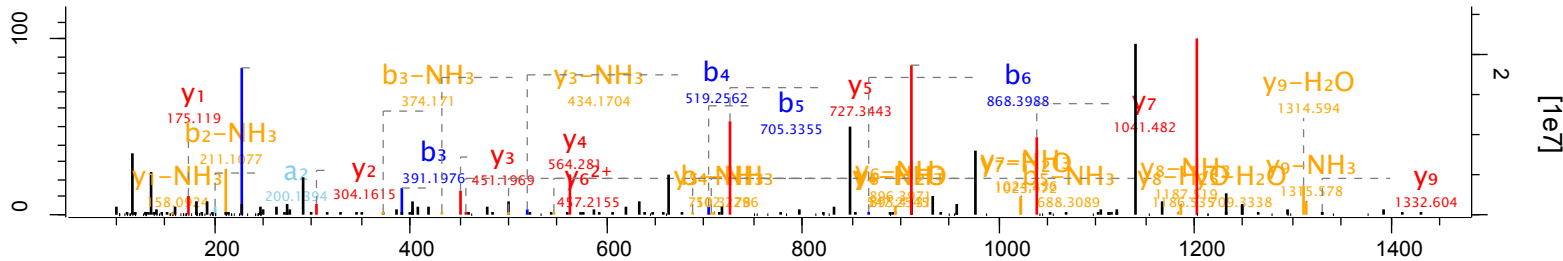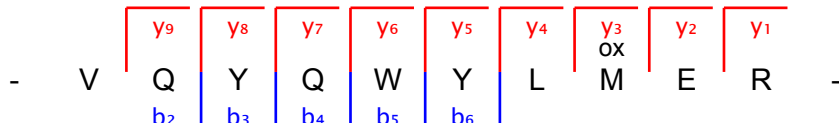



| Raw file                                   | Scan  | Method    | Score | m/z    | Gene names |
|--------------------------------------------|-------|-----------|-------|--------|------------|
| 20121216_EXQ1_AtDe_50CM_LFQ_myotubes_OG3_6 | 41727 | FTMS; HCD | 81.3  | 482.79 | Plch1      |

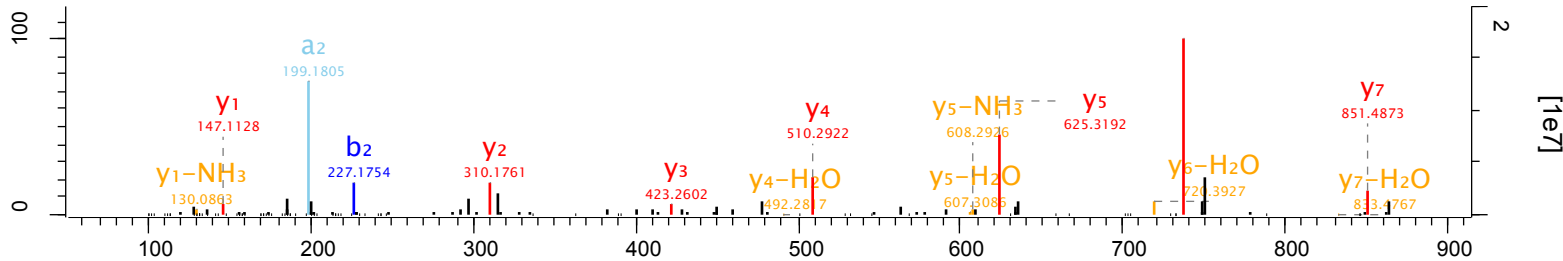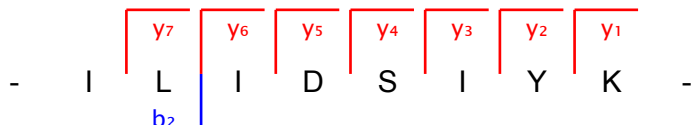

Raw file

20121216\_EXQ1\_AtDe\_50CM\_LFQ\_myotubes\_OG3\_6

Scan

46537

Method

FTMS; HCD

Score

79.47

m/z

482.79

Gene names

Plch1

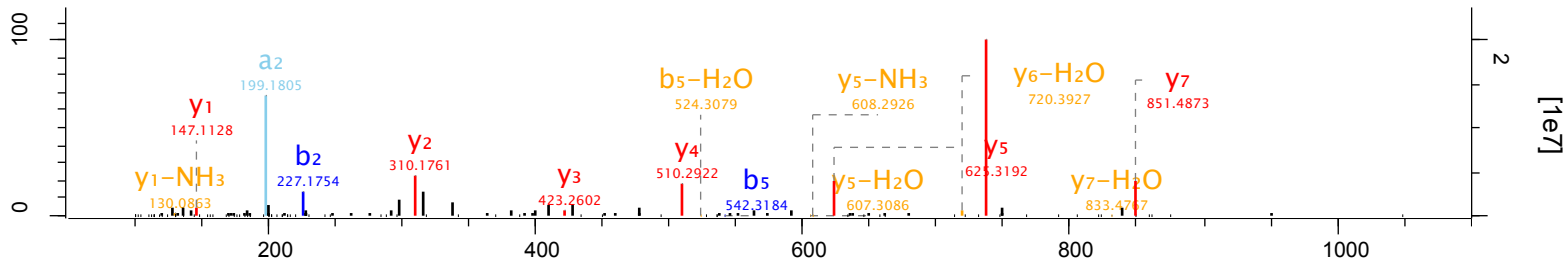

| Raw file                                   | Scan  | Method    | Score  | m/z    | Gene names |
|--------------------------------------------|-------|-----------|--------|--------|------------|
| 20121216_EXQ1_AtDe_50CM_LFQ_myotubes_OG3_6 | 46931 | FTMS; HCD | 156.17 | 743.92 | Med21      |

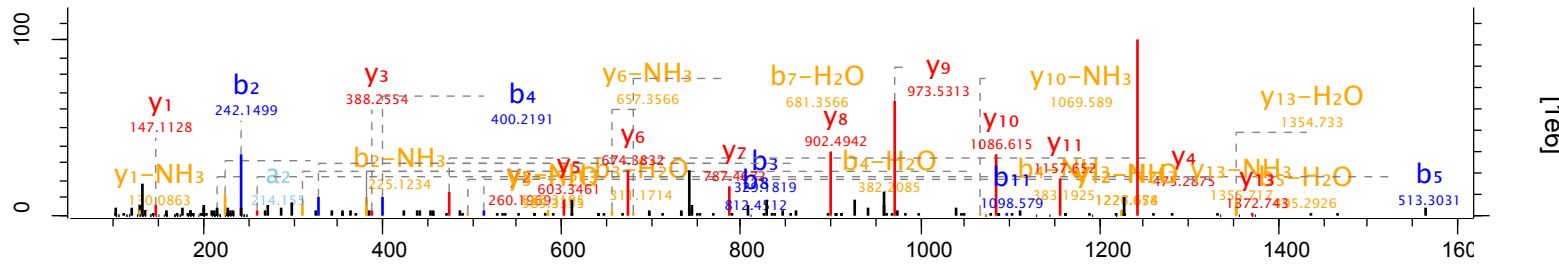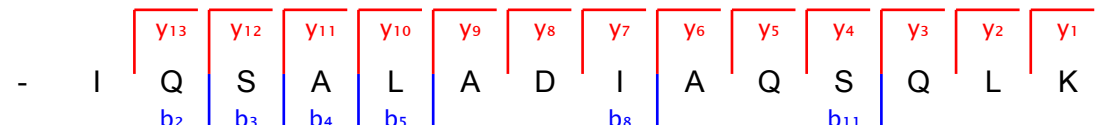

| Raw file                                   | Scan  | Method    | Score  | m/z    | Gene names |
|--------------------------------------------|-------|-----------|--------|--------|------------|
| 20121216_EXQ1_AtDe_50CM_LFQ_myotubes_OG3_6 | 46941 | FTMS; HCD | 153.75 | 694.01 | Hemk1      |

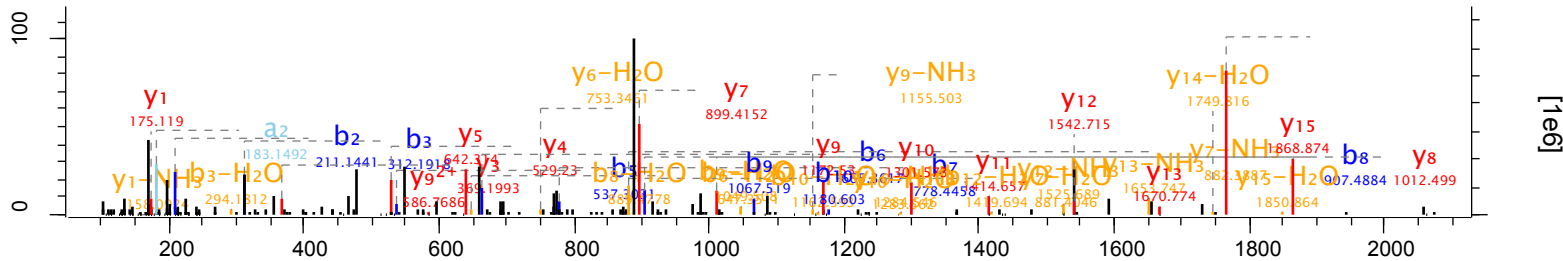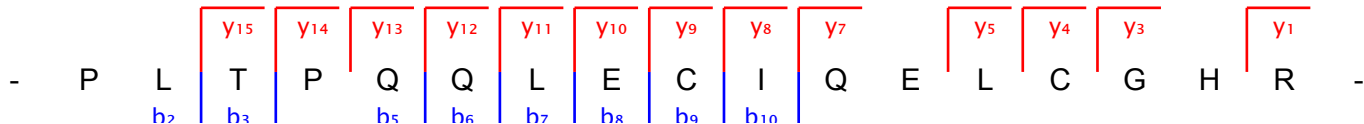

| Raw file                                   | Scan  | Method    | Score | m/z    | Gene names |
|--------------------------------------------|-------|-----------|-------|--------|------------|
| 20121216_EXQ1_AtDe_50CM_LFQ_myotubes_OG3_6 | 47515 | FTMS; HCD | 93.48 | 564.36 | Pet117     |

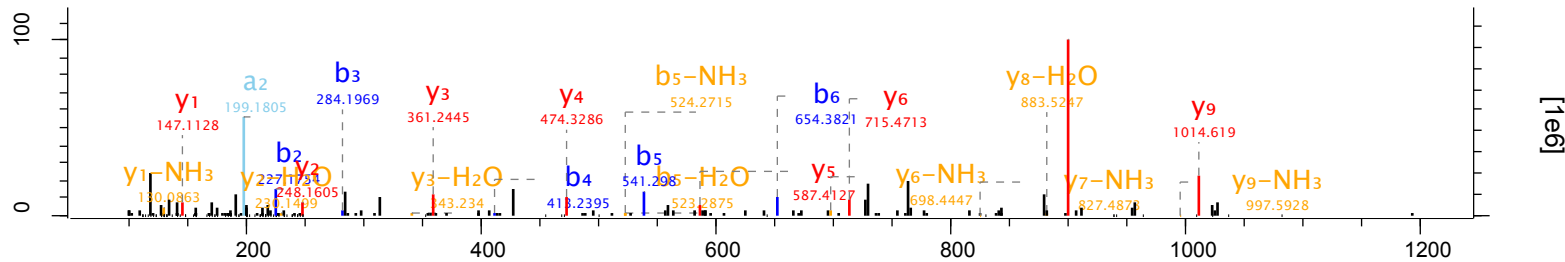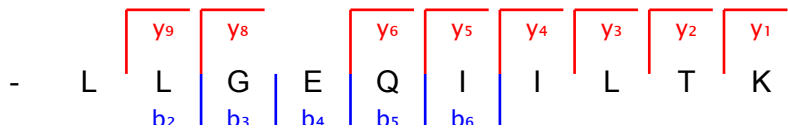

| Raw file                                   | Scan  | Method    | Score  | m/z   | Gene names |
|--------------------------------------------|-------|-----------|--------|-------|------------|
| 20121216_EXQ1_AtDe_50CM_LFQ_myotubes_OG3_6 | 48507 | FTMS; HCD | 104.06 | 510.3 | Gk5        |

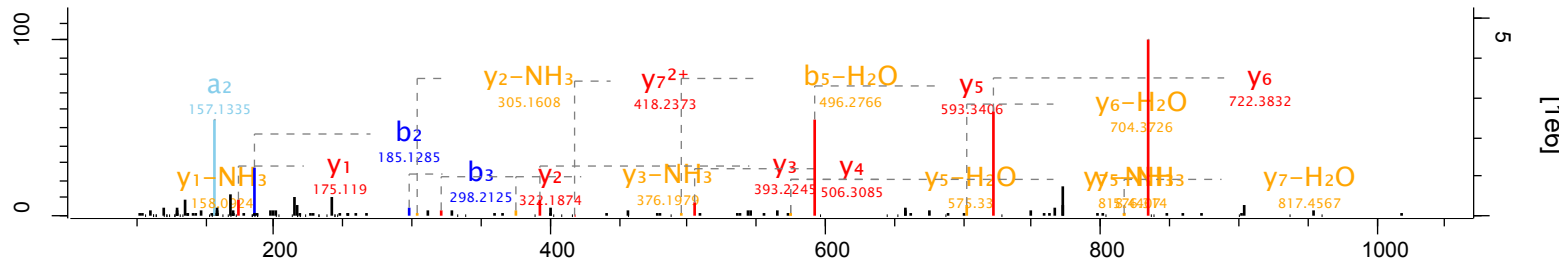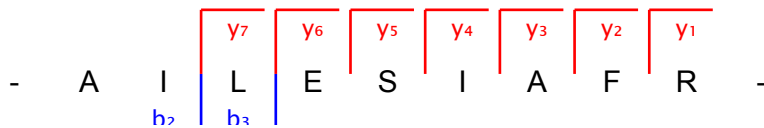

| Raw file                                   | Scan  | Method    | Score | m/z    | Gene names |
|--------------------------------------------|-------|-----------|-------|--------|------------|
| 20121216_EXQ1_AtDe_50CM_LFQ_myotubes_OG3_6 | 49763 | FTMS; HCD | 52.25 | 708.34 | Ndufa1     |

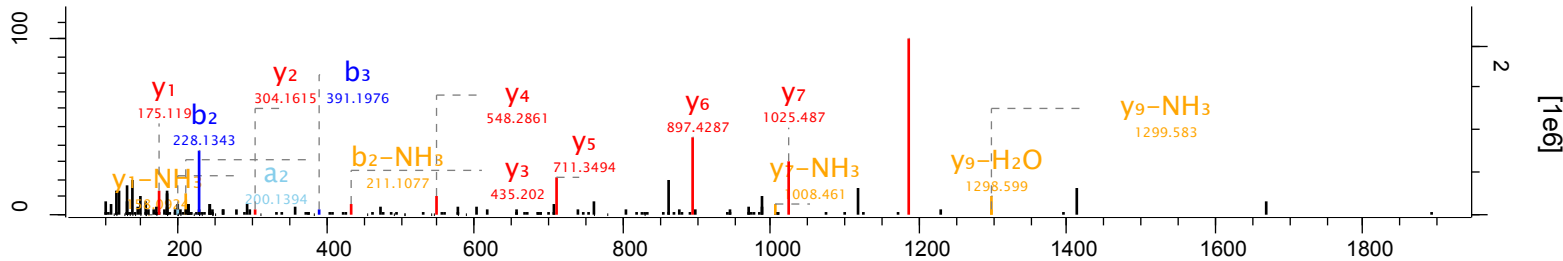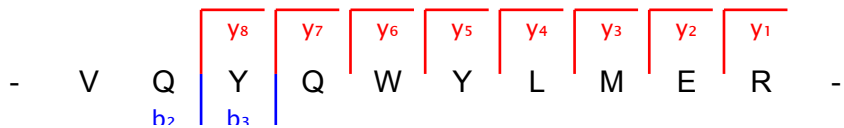

| Raw file                                   | Scan  | Method    | Score  | m/z    | Gene names |
|--------------------------------------------|-------|-----------|--------|--------|------------|
| 20121216_EXQ1_AtDe_50CM_LFQ_myotubes_OG3_6 | 50155 | FTMS; HCD | 173.24 | 708.34 | Ndufa1     |

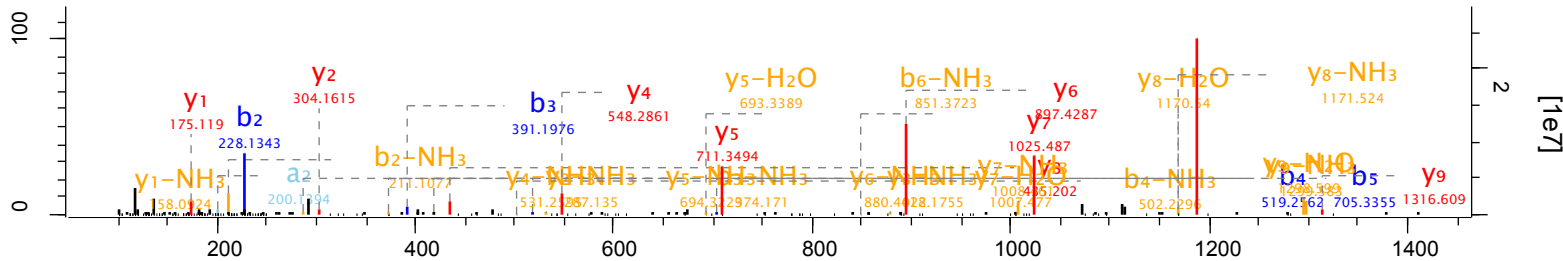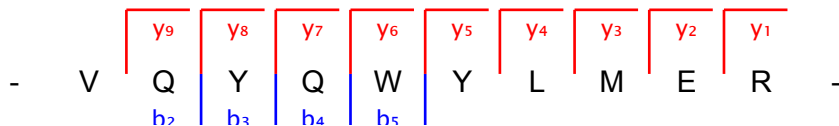



| Raw file                                   | Scan  | Method    | Score  | m/z   | Gene names |
|--------------------------------------------|-------|-----------|--------|-------|------------|
| 20121216_EXQ1_AtDe_50CM_LFQ_myotubes_OG3_6 | 50403 | FTMS; HCD | 142.51 | 727.4 | Paqr3      |

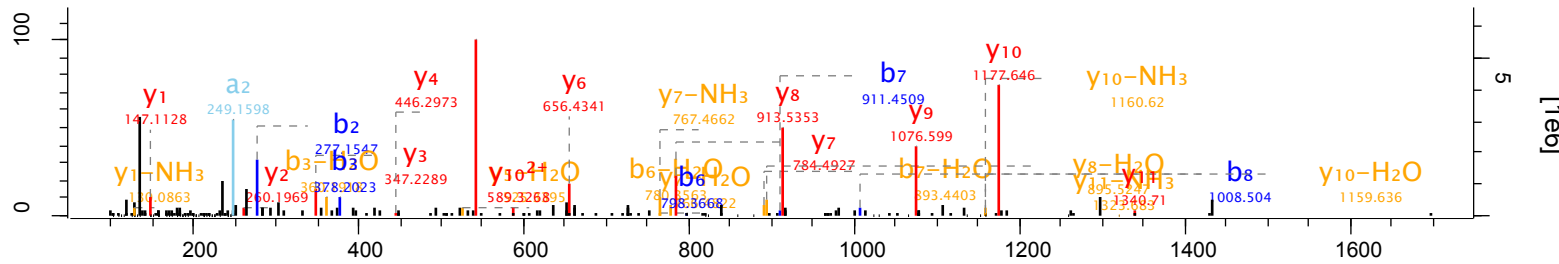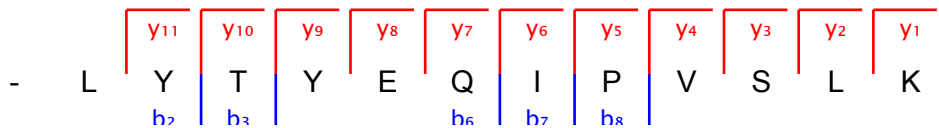

| Raw file                                   | Scan  | Method    | Score | m/z    | Gene names |
|--------------------------------------------|-------|-----------|-------|--------|------------|
| 20121216_EXQ1_AtDe_50CM_LFQ_myotubes_OG3_6 | 55782 | FTMS; HCD | 72.68 | 723.39 | D4Wsu53e   |

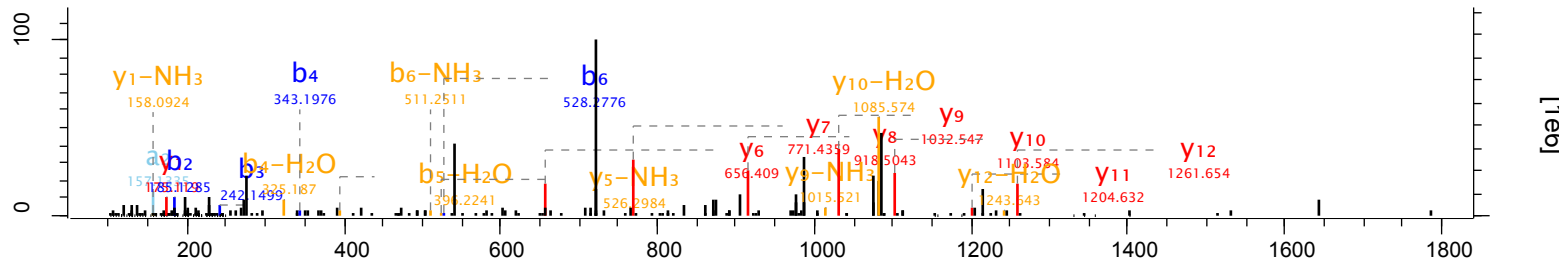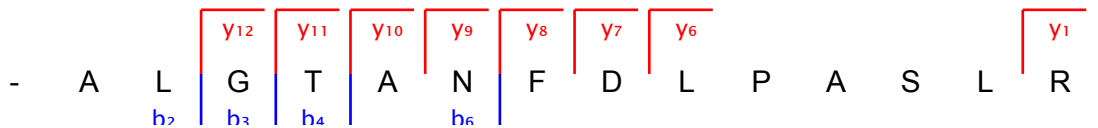

| Raw file                                   | Scan  | Method    | Score | m/z    | Gene names |
|--------------------------------------------|-------|-----------|-------|--------|------------|
| 20121216_EXQ1_AtDe_50CM_LFQ_myotubes_OG3_6 | 57898 | FTMS; HCD | 82.01 | 973.55 | Igln5      |

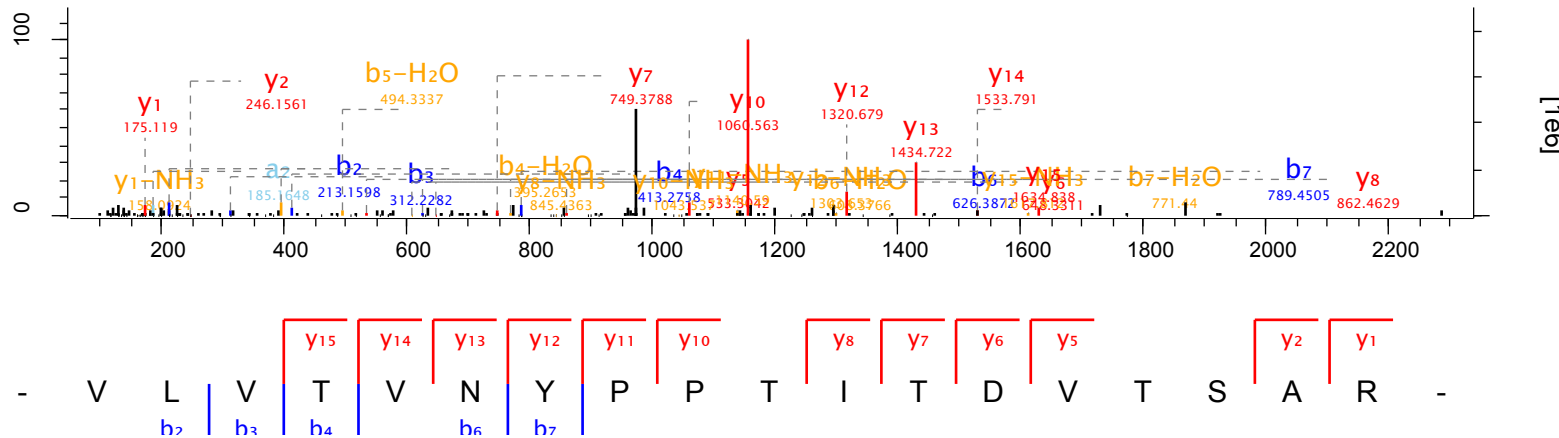

| Raw file                                   | Scan  | Method    | Score  | m/z | Gene names |
|--------------------------------------------|-------|-----------|--------|-----|------------|
| 20121216_EXQ1_AtDe_50CM_LFQ_myotubes_OG3_6 | 59520 | FTMS; HCD | 103.13 | 942 | Zbtb43     |

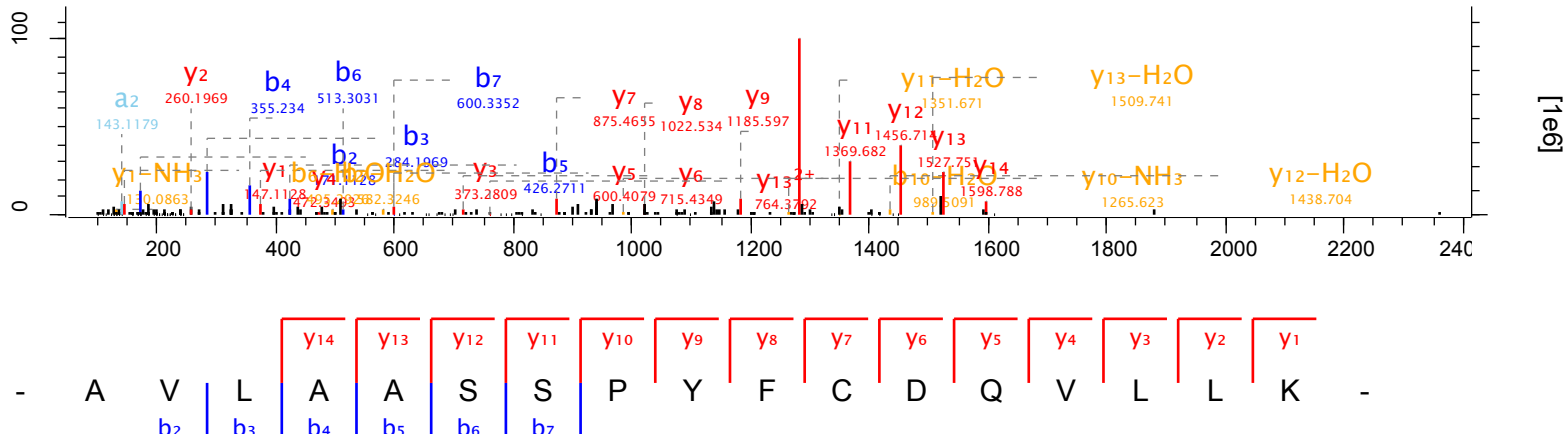

| Raw file                                   | Scan  | Method    | Score | m/z    | Gene names |
|--------------------------------------------|-------|-----------|-------|--------|------------|
| 20121216_EXQ1_AtDe_50CM_LFQ_myotubes_OG3_6 | 60117 | FTMS; HCD | 79.35 | 848.97 | Fbxw7      |

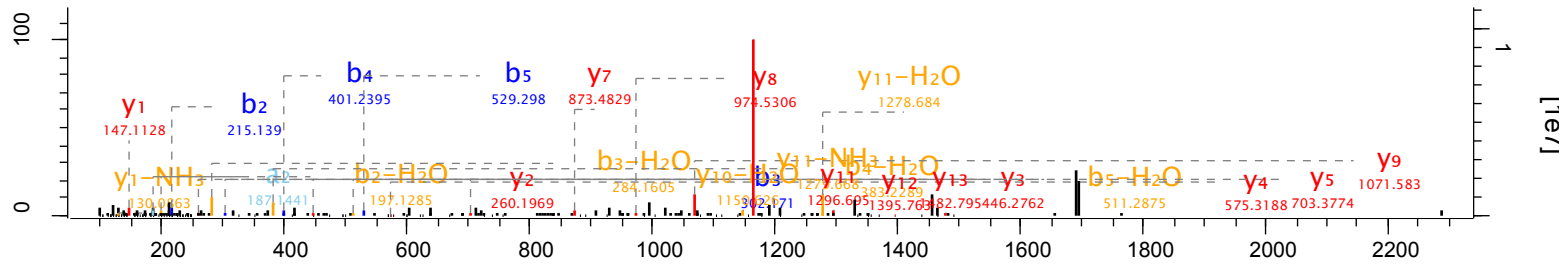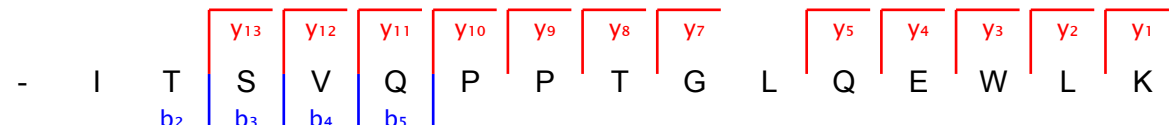

Raw file

20121216\_EXQ1\_AtDe\_50CM\_LFQ\_myotubes\_OG3\_6

Scan

60748

Method

FTMS; HCD

Score

95.98

m/z

716.43

Gene names

Ssna1

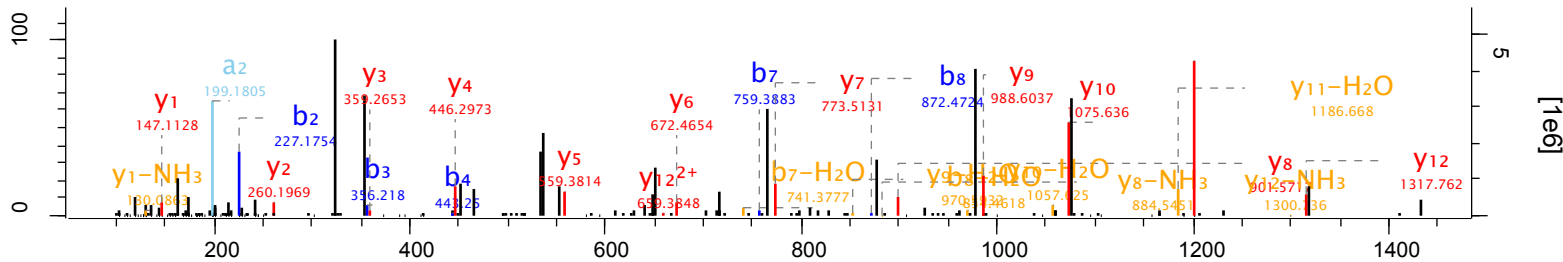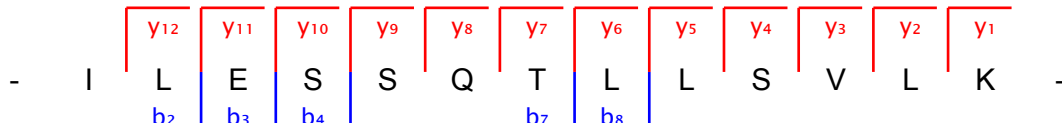

| Raw file                                   | Scan  | Method    | Score  | m/z    | Gene names |
|--------------------------------------------|-------|-----------|--------|--------|------------|
| 20121216_EXQ1_AtDe_50CM_LFQ_myotubes_OG3_6 | 60800 | FTMS; HCD | 160.75 | 612.35 | Slc35b1    |

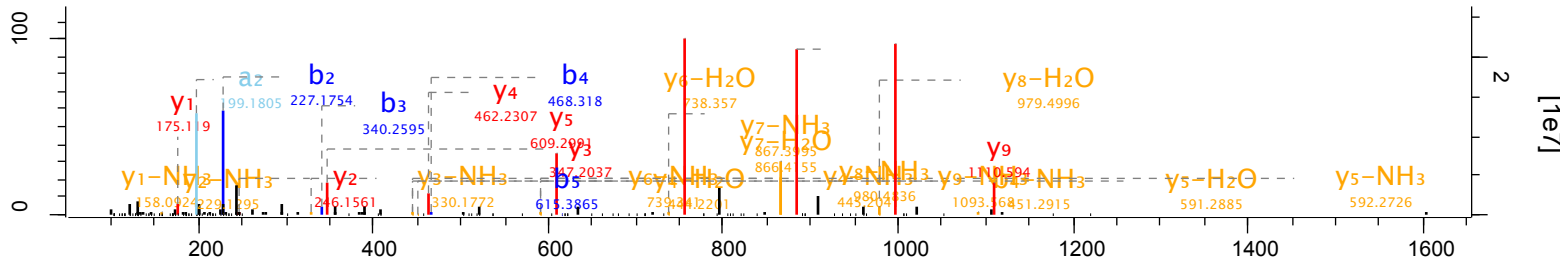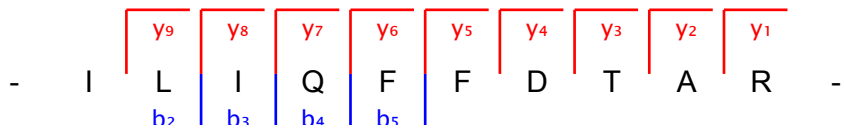

| Raw file                                   | Scan  | Method    | Score  | m/z    | Gene names |
|--------------------------------------------|-------|-----------|--------|--------|------------|
| 20121216_EXQ1_AtDe_50CM_LFQ_myotubes_OG3_6 | 60997 | FTMS; HCD | 103.73 | 970.55 | Evi2a      |

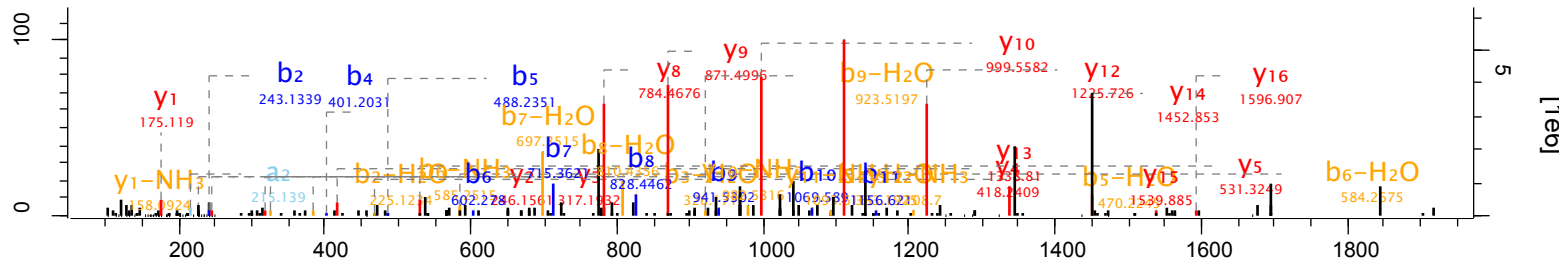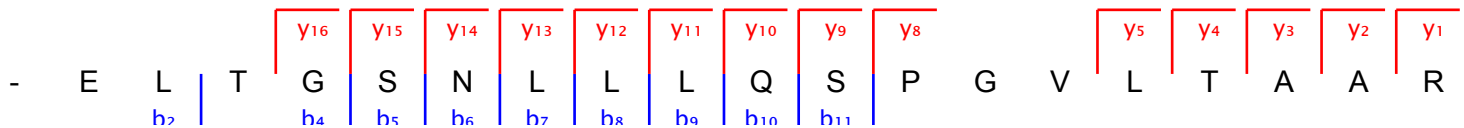



| Raw file                                   | Scan  | Method    | Score  | m/z     | Gene names |
|--------------------------------------------|-------|-----------|--------|---------|------------|
| 20121216_EXQ1_AtDe_50CM_LFQ_myotubes_OG3_6 | 64077 | FTMS; HCD | 123.12 | 1037.54 | Mpv1712    |

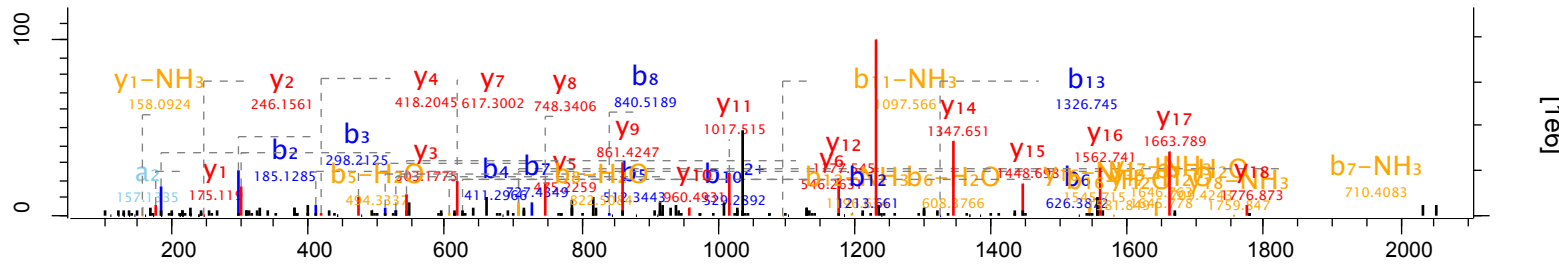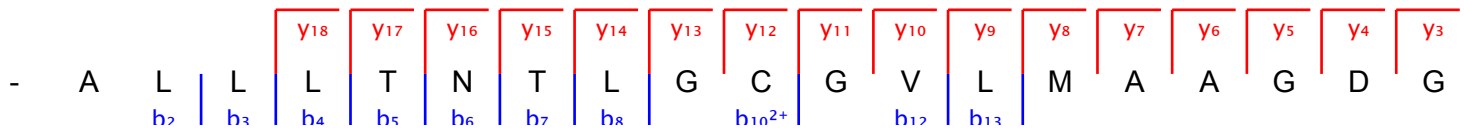

Raw file

20121216\_EXQ1\_AtDe\_50CM\_LFQ\_myotubes\_OG3\_6

Scan

64082

Method

FTMS; HCD

Score

100

m/z

692.03

Gene names

Mpv17l2

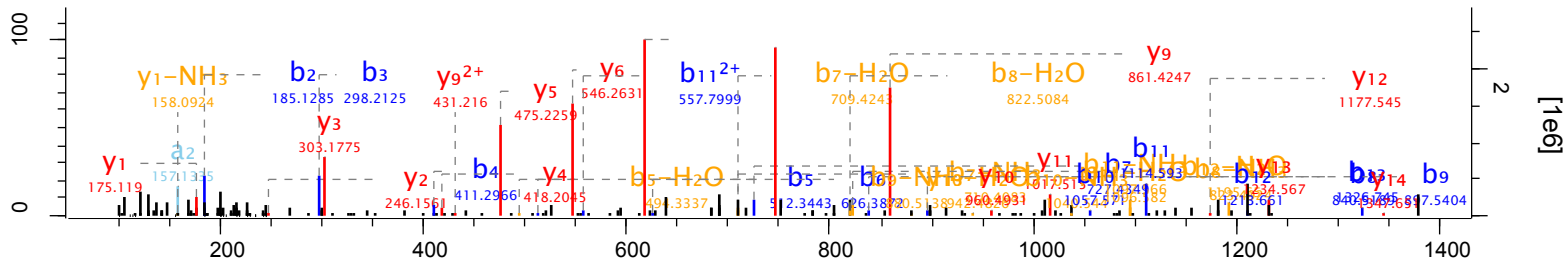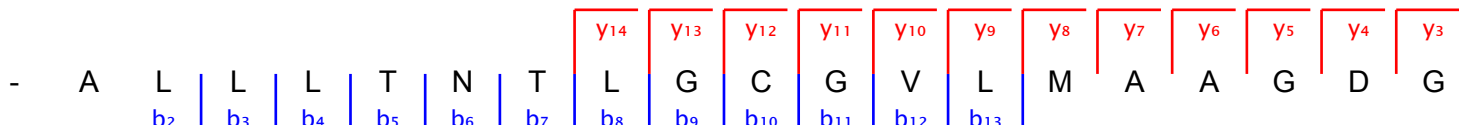

| Raw file                                   | Scan  | Method    | Score | m/z    | Gene names |
|--------------------------------------------|-------|-----------|-------|--------|------------|
| 20121216_EXQ1_AtDe_50CM_LFQ_myotubes_OG3_6 | 65502 | FTMS; HCD | 117.8 | 715.91 | Uqcr11     |

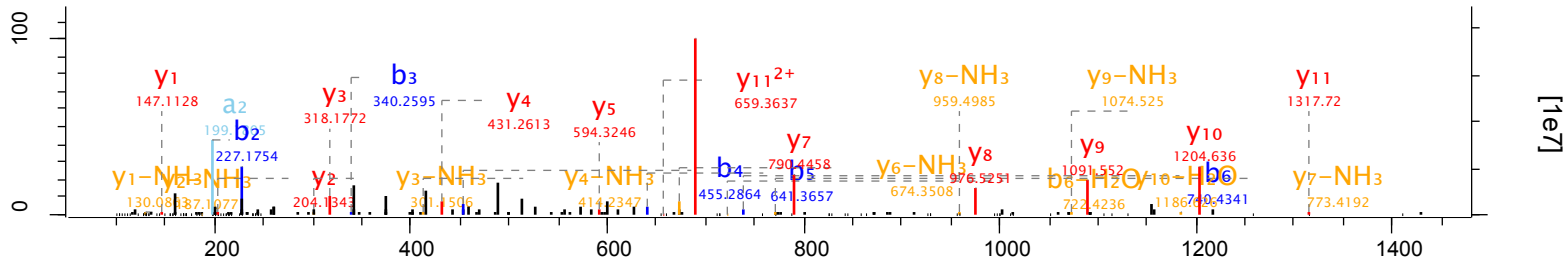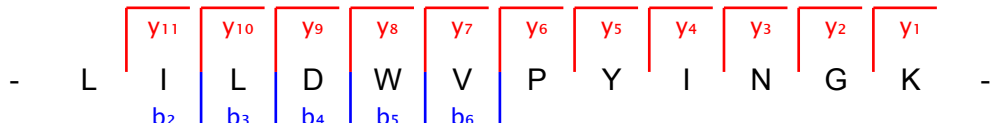

| Raw file                                   | Scan  | Method    | Score | m/z    | Gene names |
|--------------------------------------------|-------|-----------|-------|--------|------------|
| 20121216_EXQ1_AtDe_50CM_LFQ_myotubes_OG3_6 | 65504 | FTMS; HCD | 69.03 | 706.91 | Dusp15     |

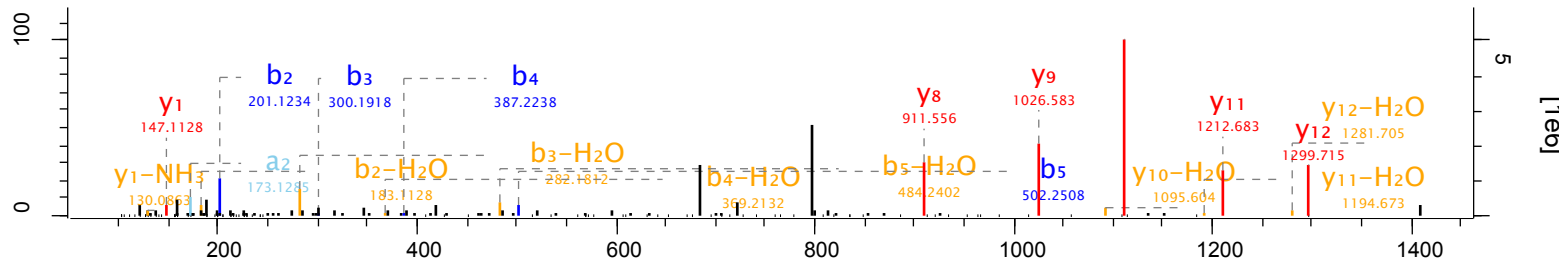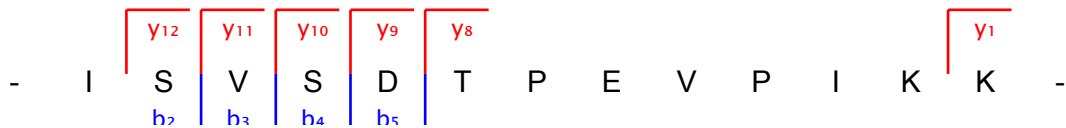

| Raw file                                   | Scan  | Method    | Score  | m/z    | Gene names |
|--------------------------------------------|-------|-----------|--------|--------|------------|
| 20121216_EXQ1_AtDe_50CM_LFQ_myotubes_OG3_6 | 66702 | FTMS; HCD | 141.65 | 729.92 | Snrnp35    |

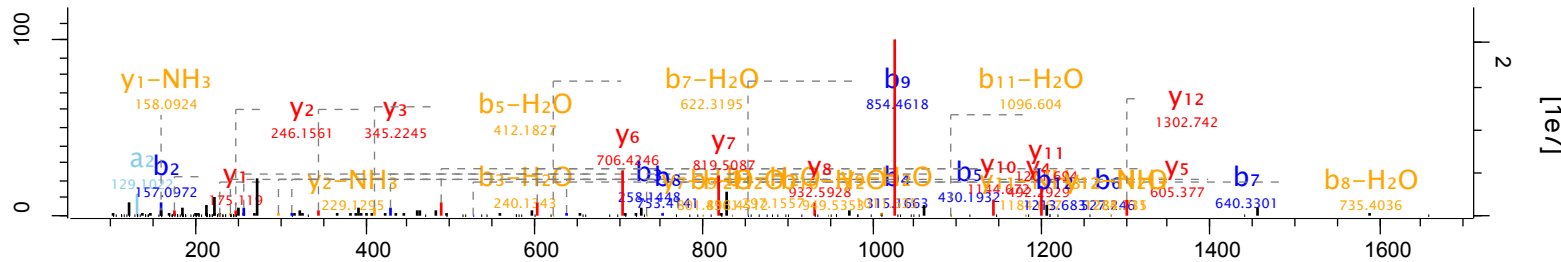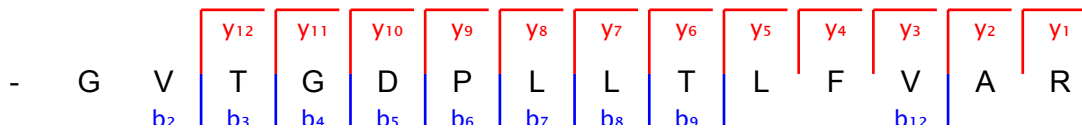

| Raw file                                   | Scan  | Method    | Score | m/z    | Gene names |
|--------------------------------------------|-------|-----------|-------|--------|------------|
| 20121216_EXQ1_AtDe_50CM_LFQ_myotubes_OG3_6 | 68940 | FTMS; HCD | 57.53 | 992.08 | Slc50a1    |

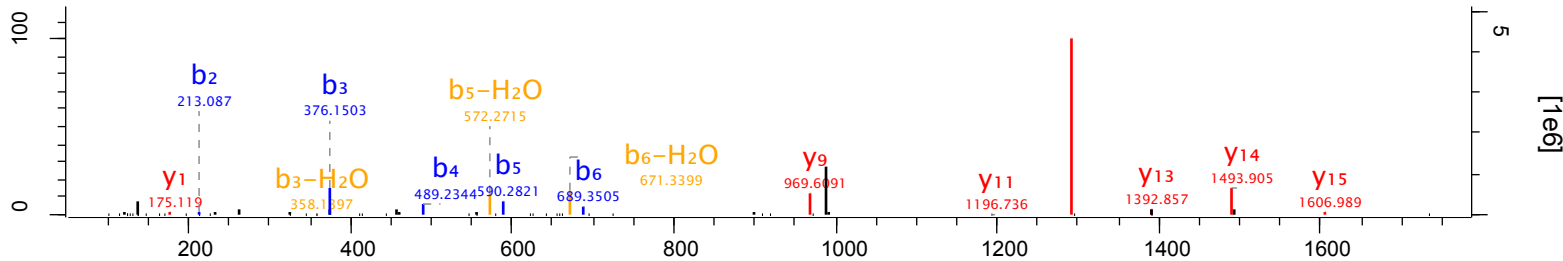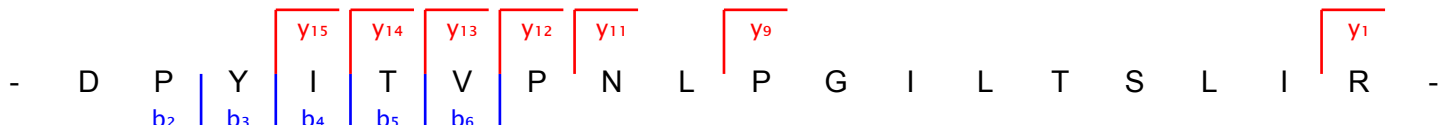

| Raw file                                   | Scan  | Method    | Score | m/z    | Gene names |
|--------------------------------------------|-------|-----------|-------|--------|------------|
| 20121216_EXQ1_AtDe_50CM_LFQ_myotubes_OG3_7 | 10301 | FTMS; HCD | 83.35 | 559.59 | Gm17455    |

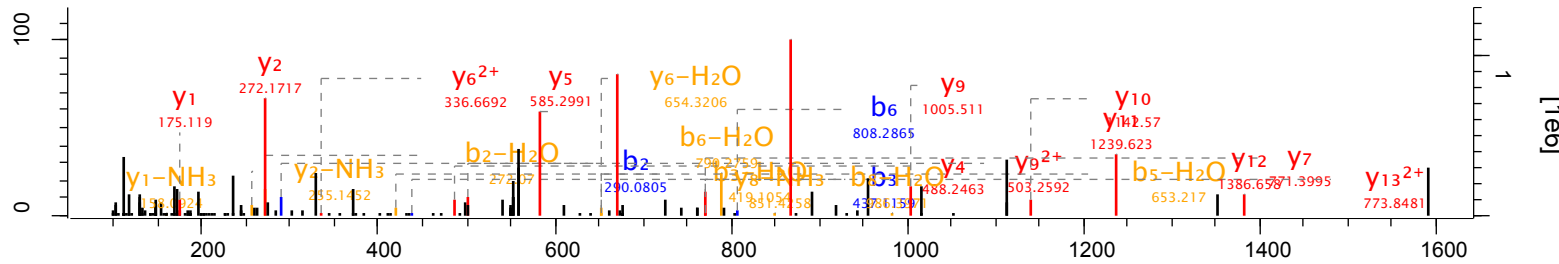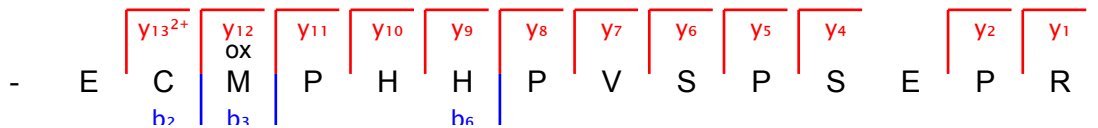

| Raw file                                   | Scan  | Method    | Score  | m/z    | Gene names  |
|--------------------------------------------|-------|-----------|--------|--------|-------------|
| 20121216_EXQ1_AtDe_50CM_LFQ_myotubes_OG3_7 | 11830 | FTMS; HCD | 107.93 | 532.61 | mt-Co3;Mtco |

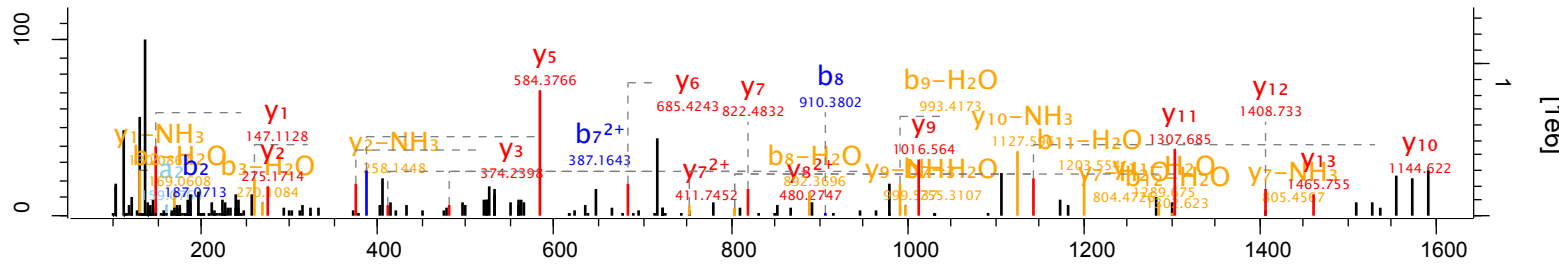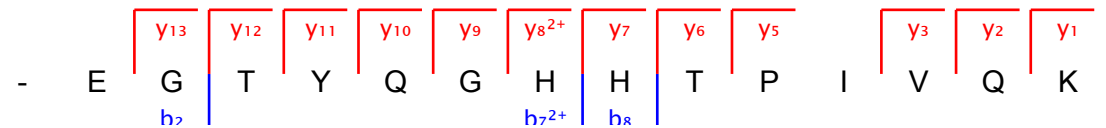



| Raw file                                   | Scan  | Method    | Score  | m/z    | Gene names  |
|--------------------------------------------|-------|-----------|--------|--------|-------------|
| 20121216_EXQ1_AtDe_50CM_LFQ_myotubes_OG3_7 | 11882 | FTMS; HCD | 127.32 | 798.38 | mt-Co3;Mtco |

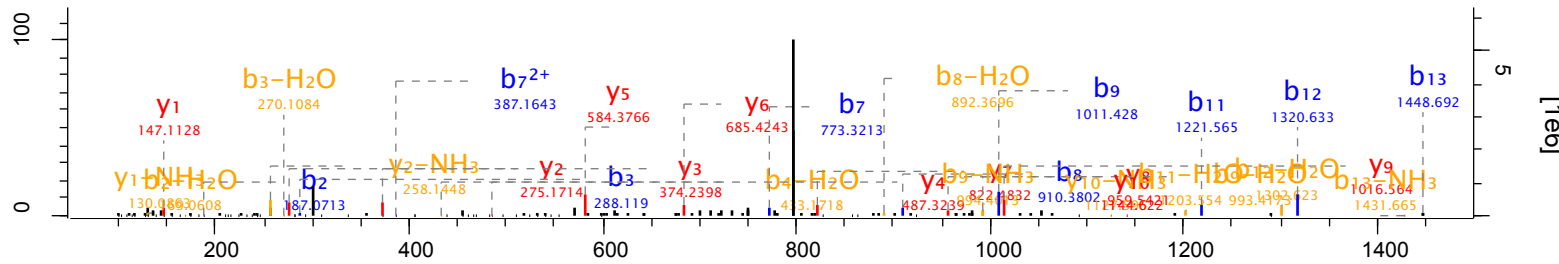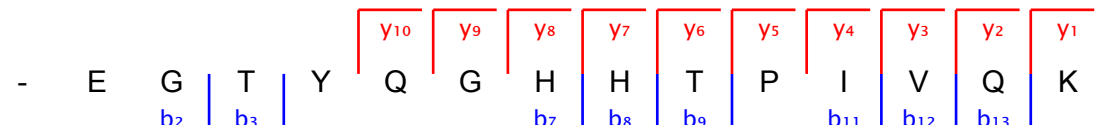

| Raw file                                   | Scan  | Method    | Score | m/z    | Gene names |
|--------------------------------------------|-------|-----------|-------|--------|------------|
| 20121216_EXQ1_AtDe_50CM_LFQ_myotubes_OG3_7 | 12322 | FTMS; HCD | 87.65 | 484.22 | Osr1;Osr2  |

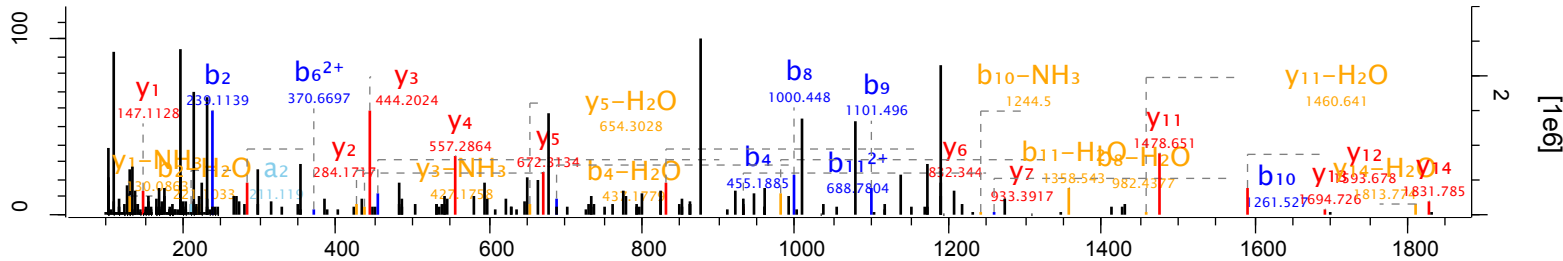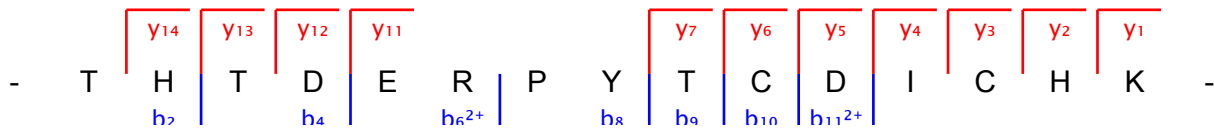

| Raw file                                   | Scan  | Method    | Score | m/z    | Gene names |
|--------------------------------------------|-------|-----------|-------|--------|------------|
| 20121216_EXQ1_AtDe_50CM_LFQ_myotubes_OG3_7 | 13704 | FTMS; HCD | 86.94 | 830.88 | Gm17455    |

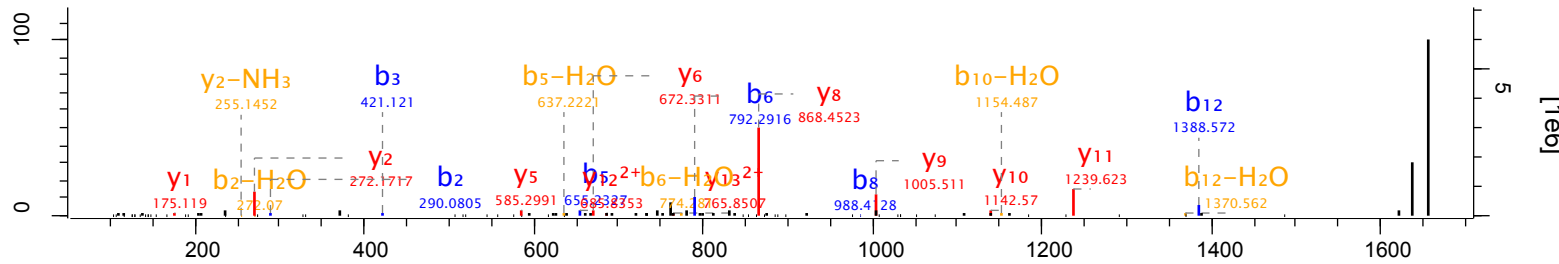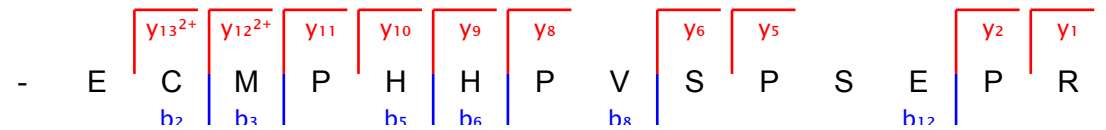

| Raw file                                   | Scan  | Method    | Score  | m/z    | Gene names |
|--------------------------------------------|-------|-----------|--------|--------|------------|
| 20121216_EXQ1_AtDe_50CM_LFQ_myotubes_OG3_7 | 13731 | FTMS; HCD | 105.78 | 554.25 | Gm17455    |

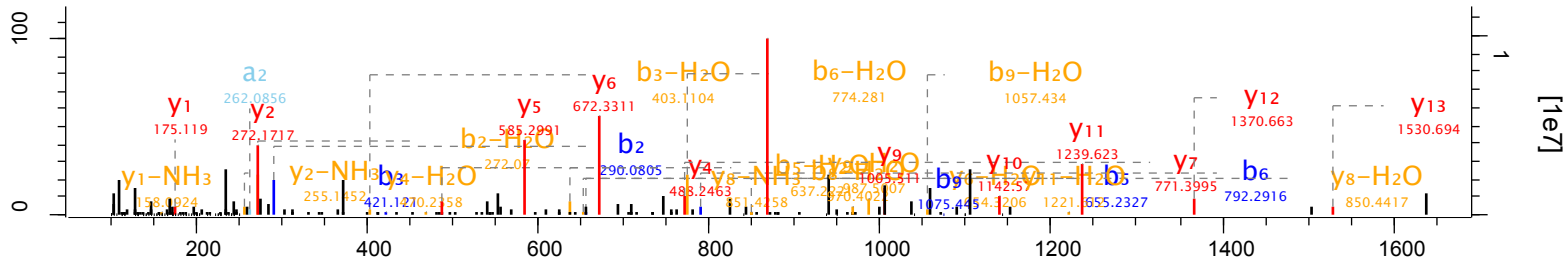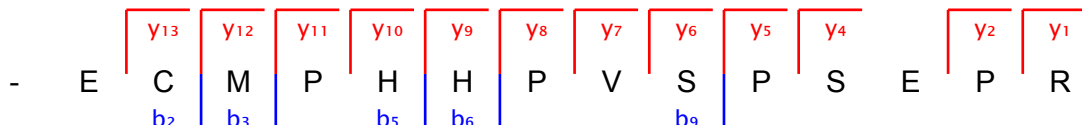

| Raw file                                   | Scan  | Method    | Score | m/z    | Gene names  |
|--------------------------------------------|-------|-----------|-------|--------|-------------|
| 20121216_EXQ1_AtDe_50CM_LFQ_myotubes_OG3_7 | 14056 | FTMS; HCD | 80.29 | 674.36 | Ypel1;Ypel2 |

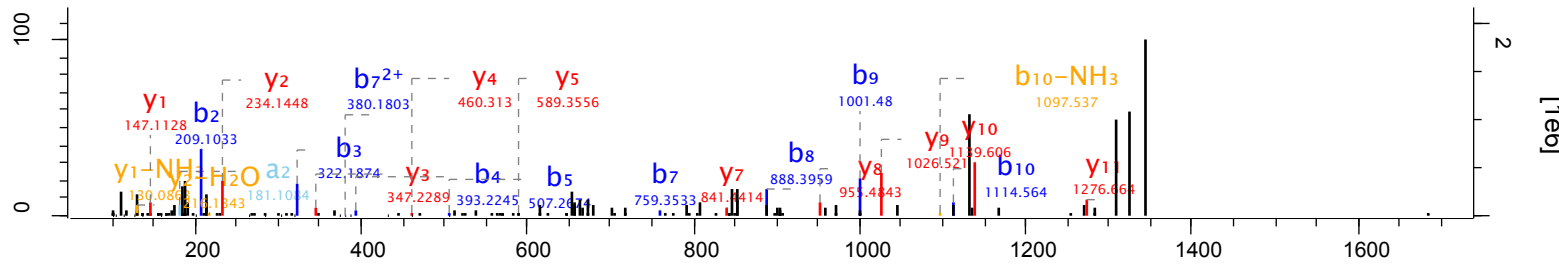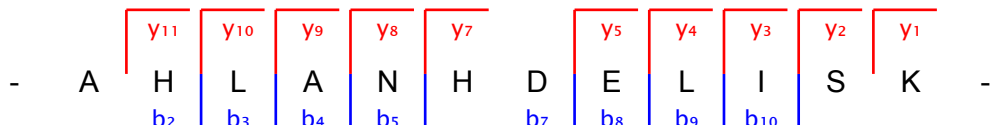

| Raw file                                   | Scan  | Method    | Score  | m/z    | Gene names |
|--------------------------------------------|-------|-----------|--------|--------|------------|
| 20121216_EXQ1_AtDe_50CM_LFQ_myotubes_OG3_7 | 14784 | FTMS; HCD | 131.08 | 519.93 | Dagla      |

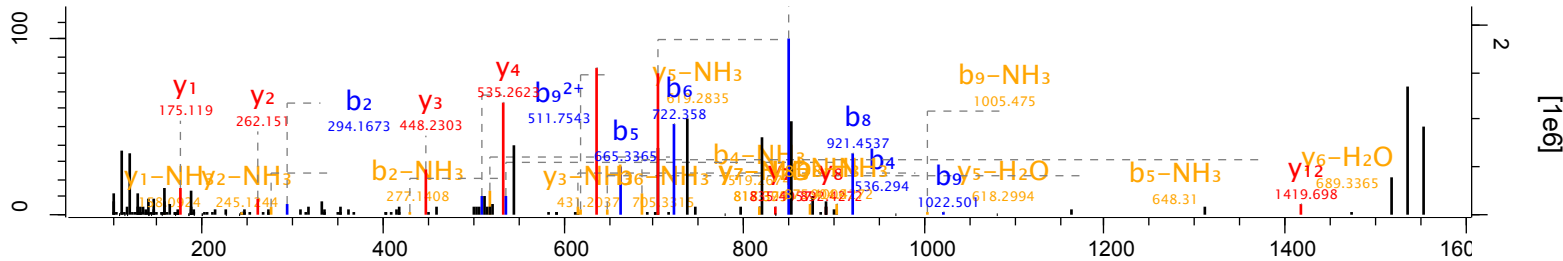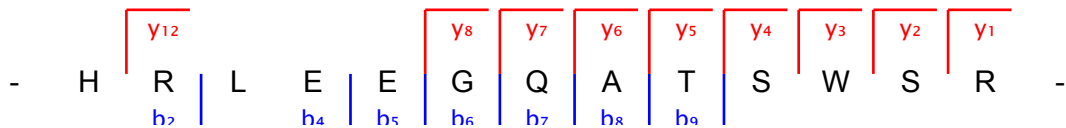

| Raw file                                   | Scan  | Method    | Score  | m/z    | Gene names |
|--------------------------------------------|-------|-----------|--------|--------|------------|
| 20121216_EXQ1_AtDe_50CM_LFQ_myotubes_OG3_7 | 15727 | FTMS; HCD | 129.65 | 617.96 | Golgb1     |

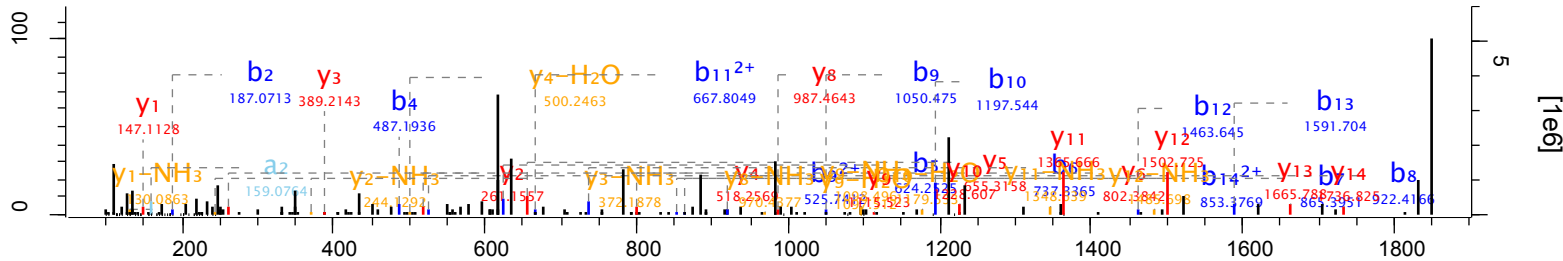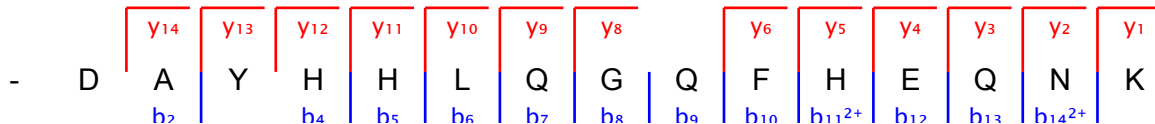

| Raw file                                   | Scan  | Method    | Score  | m/z   | Gene names |
|--------------------------------------------|-------|-----------|--------|-------|------------|
| 20121216_EXQ1_AtDe_50CM_LFQ_myotubes_OG3_7 | 19119 | FTMS; HCD | 127.03 | 407.9 | Tceanc2    |

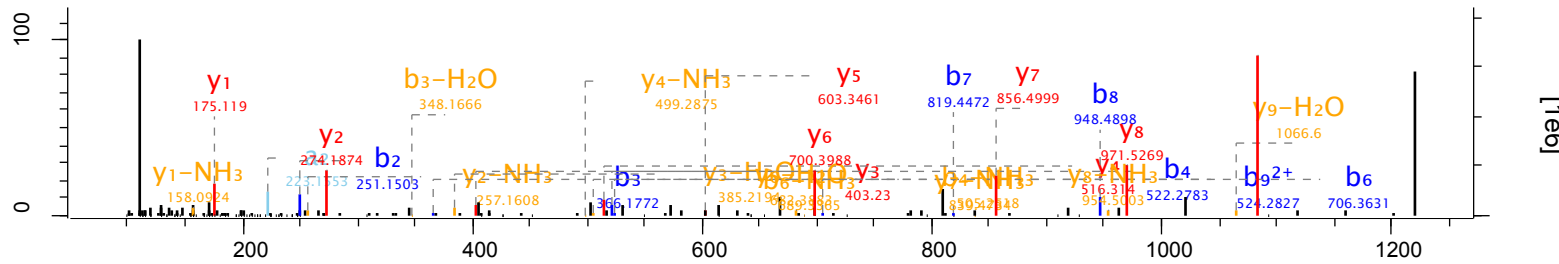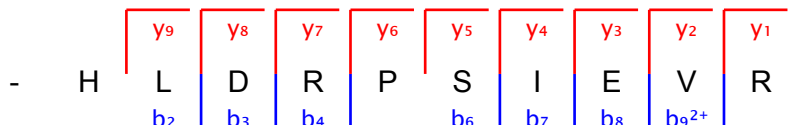



| Raw file                                   | Scan  | Method    | Score | m/z    | Gene names |
|--------------------------------------------|-------|-----------|-------|--------|------------|
| 20121216_EXQ1_AtDe_50CM_LFQ_myotubes_OG3_7 | 27686 | FTMS; HCD | 147.3 | 547.82 | Zufsp      |

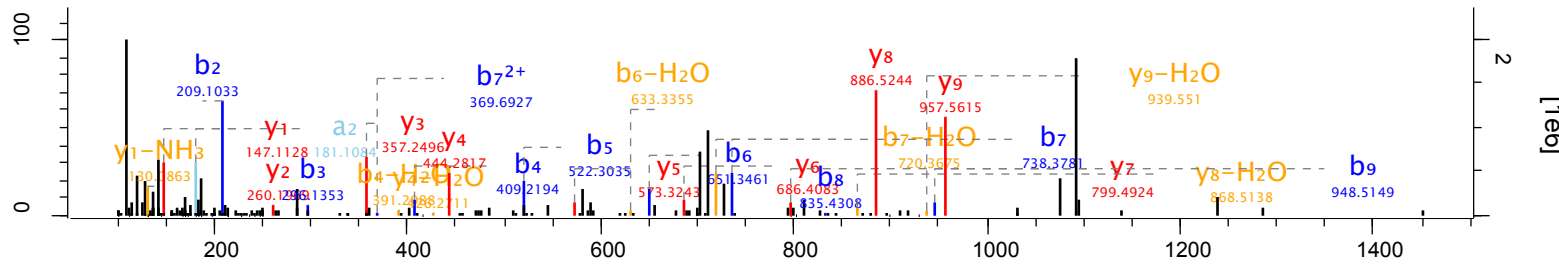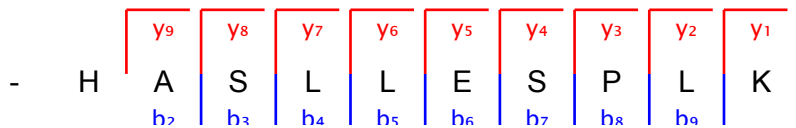



| Raw file                                   | Scan  | Method    | Score  | m/z    | Gene names |
|--------------------------------------------|-------|-----------|--------|--------|------------|
| 20121216_EXQ1_AtDe_50CM_LFQ_myotubes_OG3_7 | 31617 | FTMS; HCD | 119.43 | 674.34 | Zbp1       |

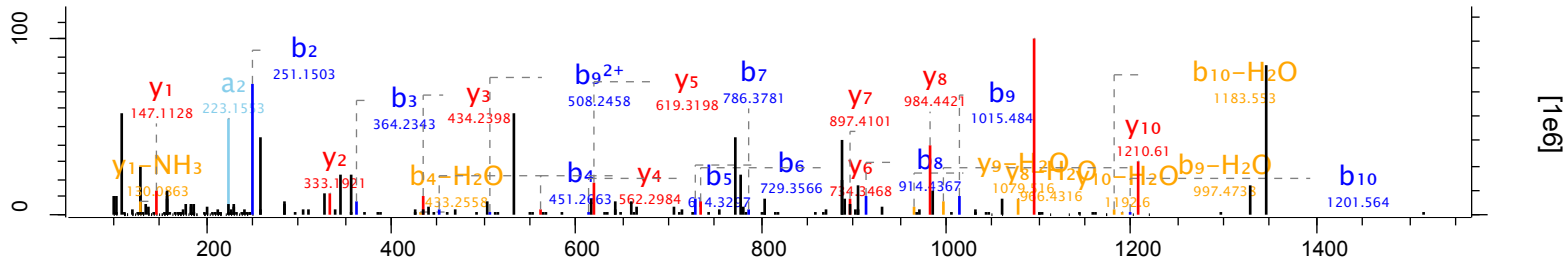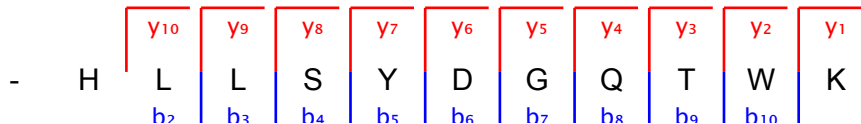

Raw file

20121216\_EXQ1\_AtDe\_50CM\_LFQ\_myotubes\_OG3\_7

Scan

38645

Method

FTMS; HCD

Score

53.5

m/z

793.92

Gene names

Gtse1

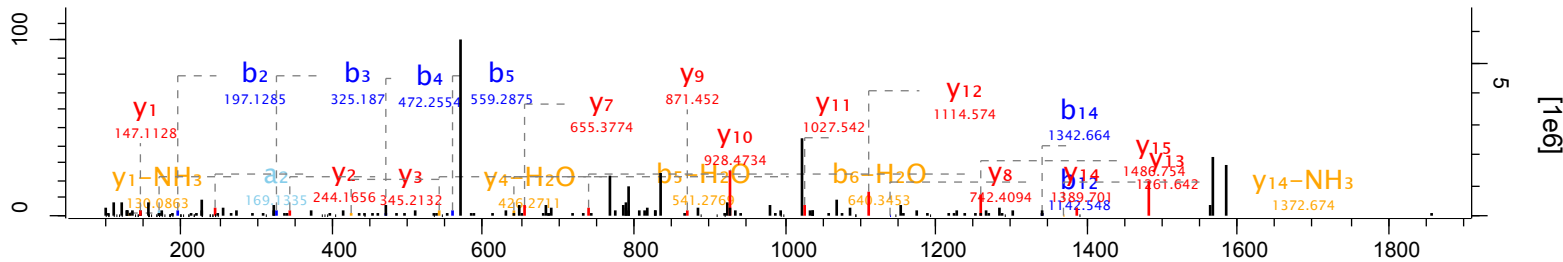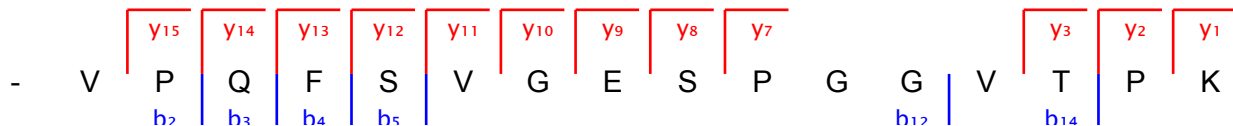

| Raw file                                   | Scan  | Method    | Score  | m/z    | Gene names |
|--------------------------------------------|-------|-----------|--------|--------|------------|
| 20121216_EXQ1_AtDe_50CM_LFQ_myotubes_OG3_7 | 39179 | FTMS; HCD | 176.25 | 780.87 | Fzd5       |

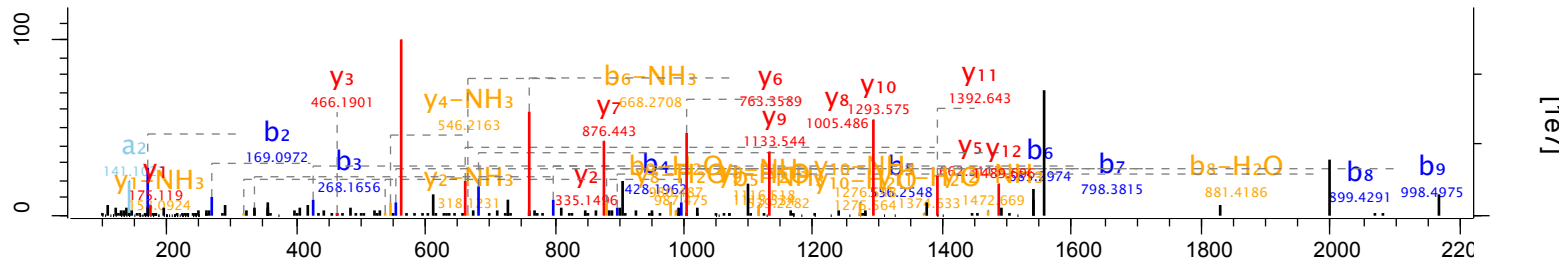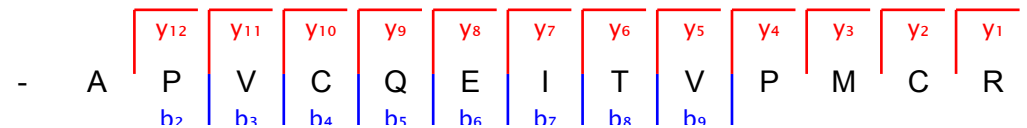

| Raw file                                   | Scan  | Method    | Score | m/z    | Gene names          |
|--------------------------------------------|-------|-----------|-------|--------|---------------------|
| 20121216_EXQ1_AtDe_50CM_LFQ_myotubes_OG3_7 | 45751 | FTMS; HCD | 95.98 | 487.61 | Kiaa0195;2310067B10 |

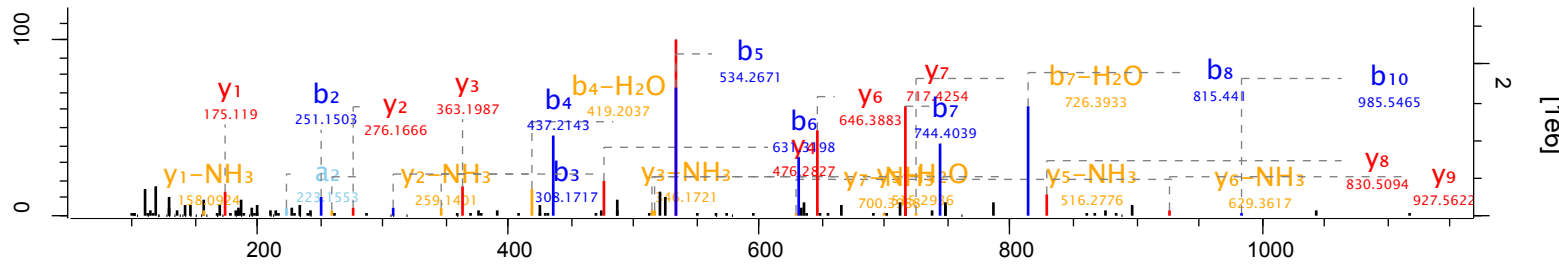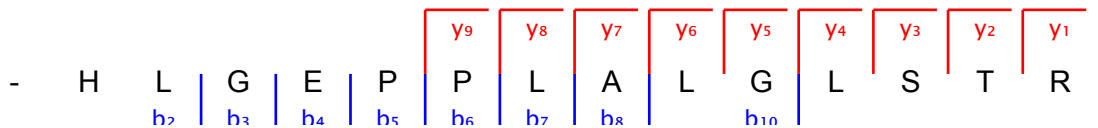

| Raw file                                   | Scan  | Method    | Score | m/z    | Gene names |
|--------------------------------------------|-------|-----------|-------|--------|------------|
| 20121216_EXQ1_AtDe_50CM_LFQ_myotubes_OG3_7 | 47157 | FTMS; HCD | 56.04 | 829.93 | Nudt17     |

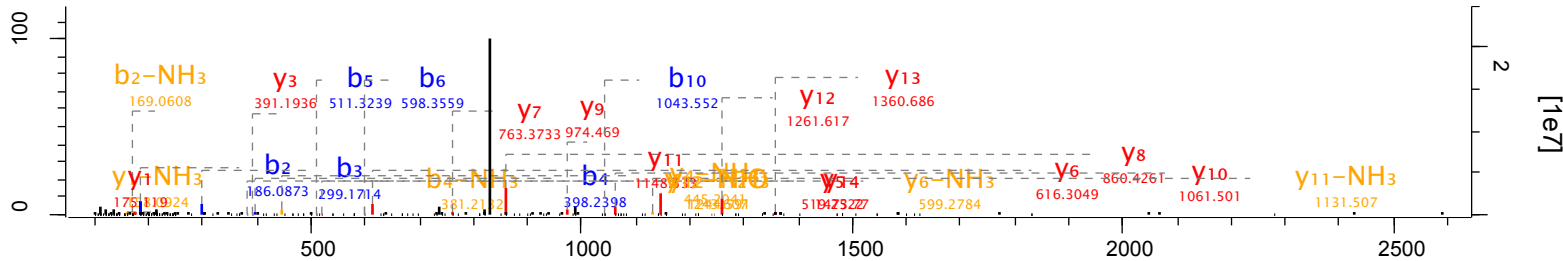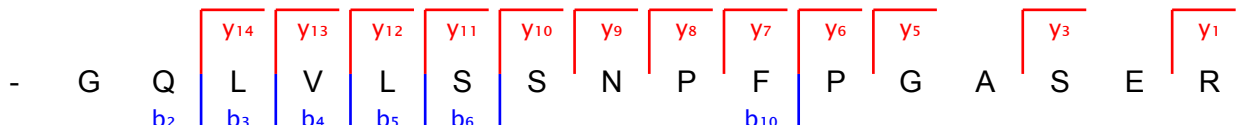

| Raw file                                   | Scan  | Method    | Score | m/z    | Gene names |
|--------------------------------------------|-------|-----------|-------|--------|------------|
| 20121216_EXQ1_AtDe_50CM_LFQ_myotubes_OG3_7 | 48666 | FTMS; HCD | 55.53 | 564.77 | Galc       |

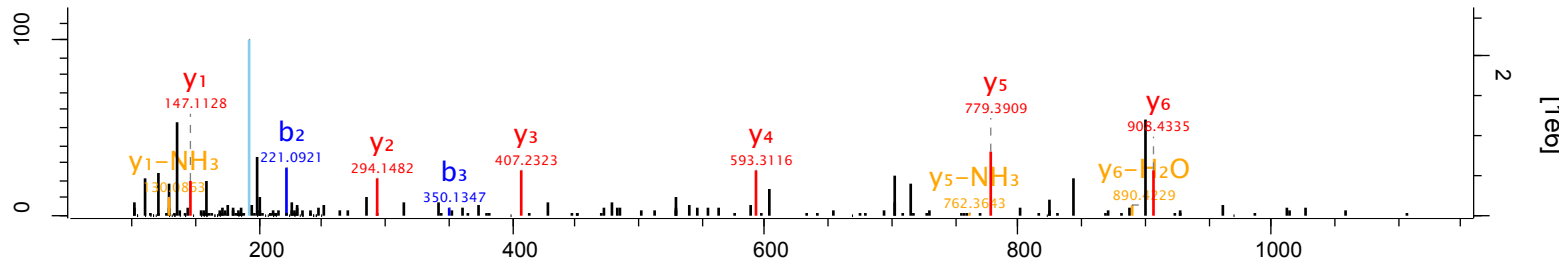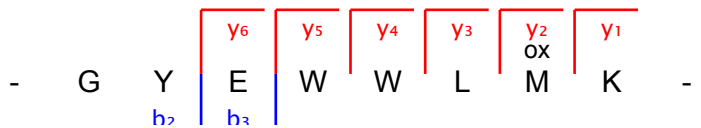



| Raw file                                   | Scan  | Method    | Score  | m/z    | Gene names |
|--------------------------------------------|-------|-----------|--------|--------|------------|
| 20121216_EXQ1_AtDe_50CM_LFQ_myotubes_OG3_7 | 59846 | FTMS; HCD | 107.78 | 702.05 | Rad51c     |

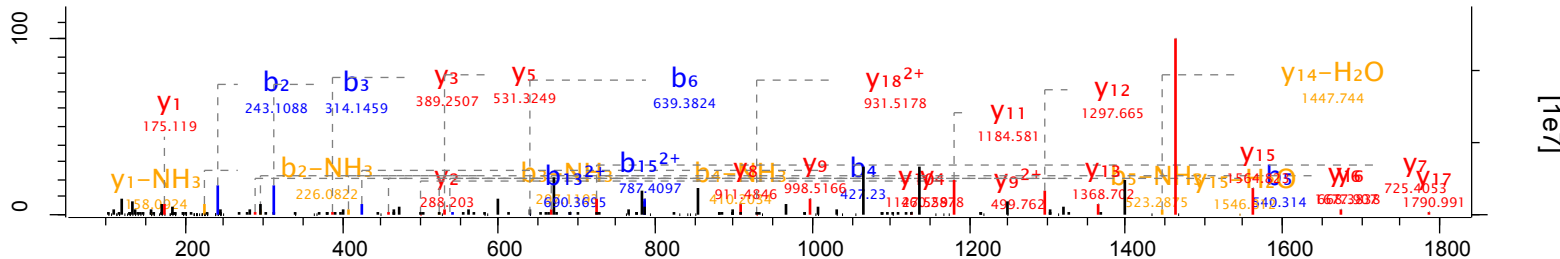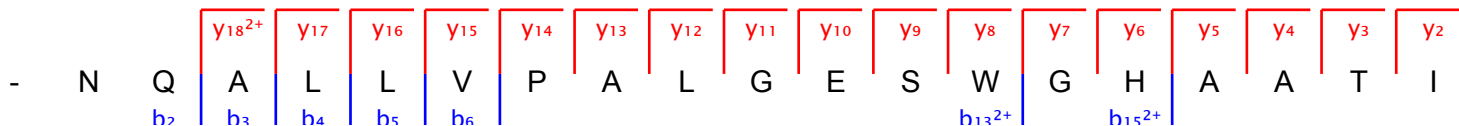

| Raw file                                   | Scan  | Method    | Score  | m/z    | Gene names |
|--------------------------------------------|-------|-----------|--------|--------|------------|
| 20121216_EXQ1_AtDe_50CM_LFQ_myotubes_OG3_7 | 59888 | FTMS; HCD | 118.54 | 978.85 | Mfsd12     |

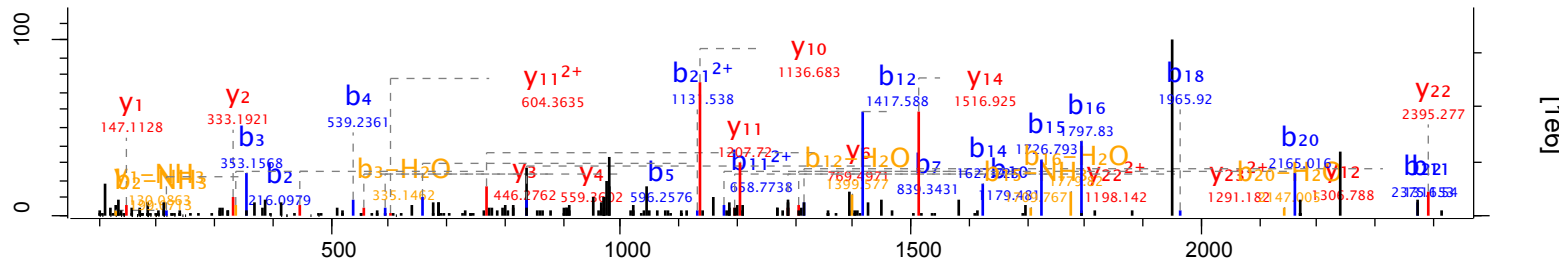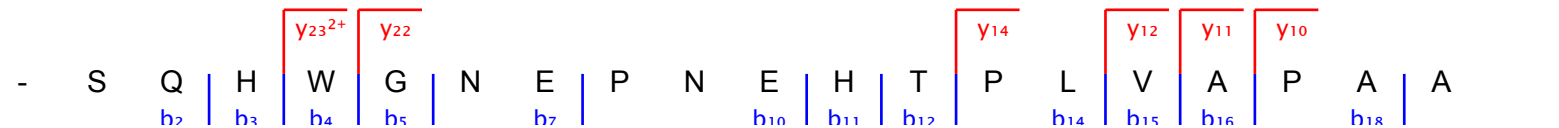

| Raw file                                   | Scan  | Method    | Score | m/z    | Gene names |
|--------------------------------------------|-------|-----------|-------|--------|------------|
| 20121216_EXQ1_AtDe_50CM_LFQ_myotubes_OG3_7 | 59930 | FTMS; HCD | 116.7 | 734.64 | Mfsd12     |

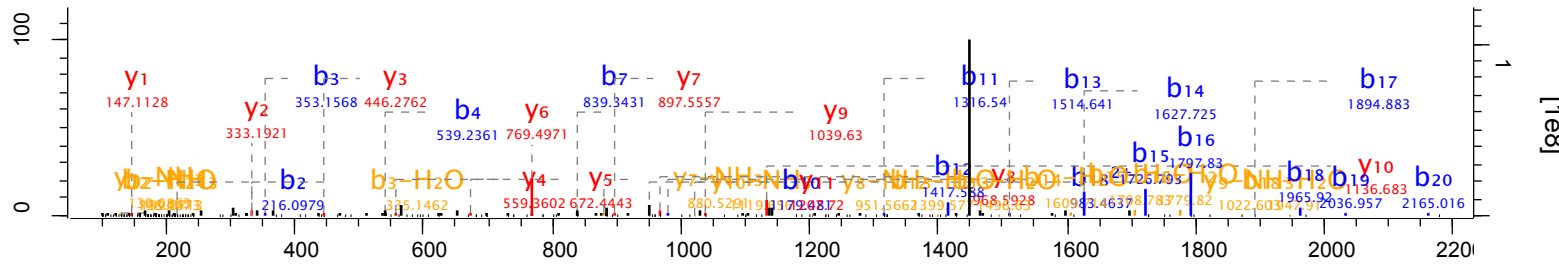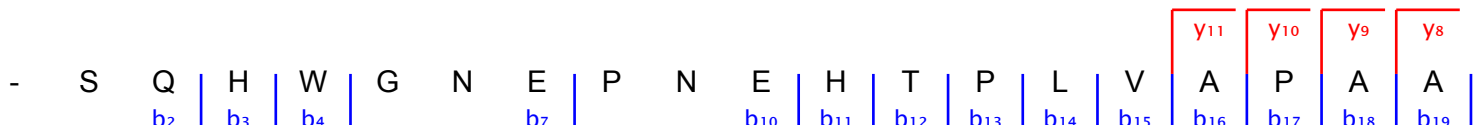

| Raw file                                   | Scan  | Method    | Score | m/z    | Gene names |
|--------------------------------------------|-------|-----------|-------|--------|------------|
| 20121216_EXQ1_AtDe_50CM_LFQ_myotubes_OG3_7 | 60440 | FTMS; HCD | 89.86 | 544.78 | Schip1     |

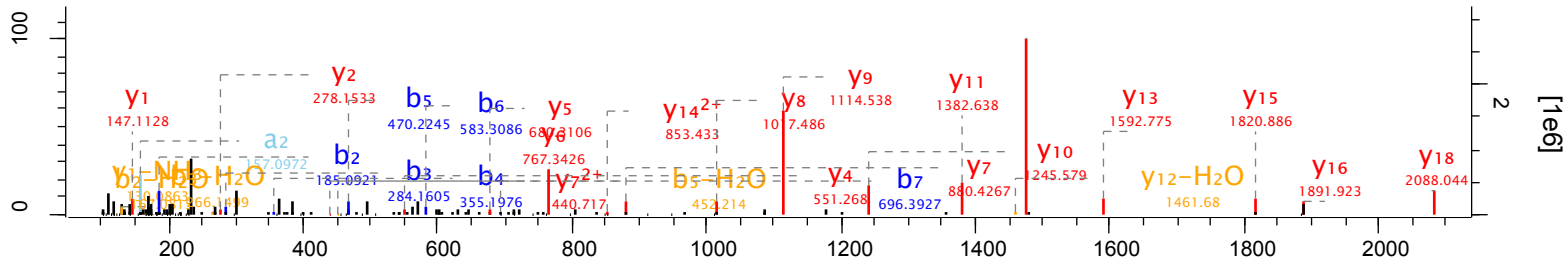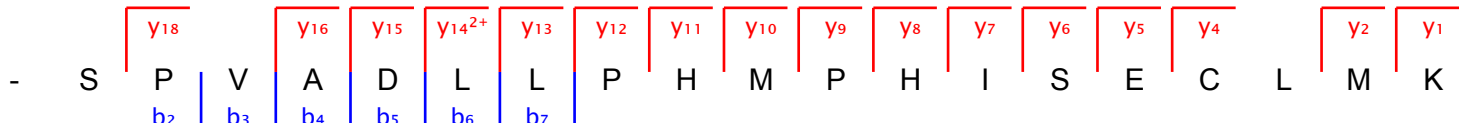

| Raw file                                   | Scan  | Method    | Score | m/z     | Gene names |
|--------------------------------------------|-------|-----------|-------|---------|------------|
| 20121216_EXQ1_AtDe_50CM_LFQ_myotubes_OG3_7 | 64866 | FTMS; HCD | 67.56 | 1038.05 | Mpv1712    |

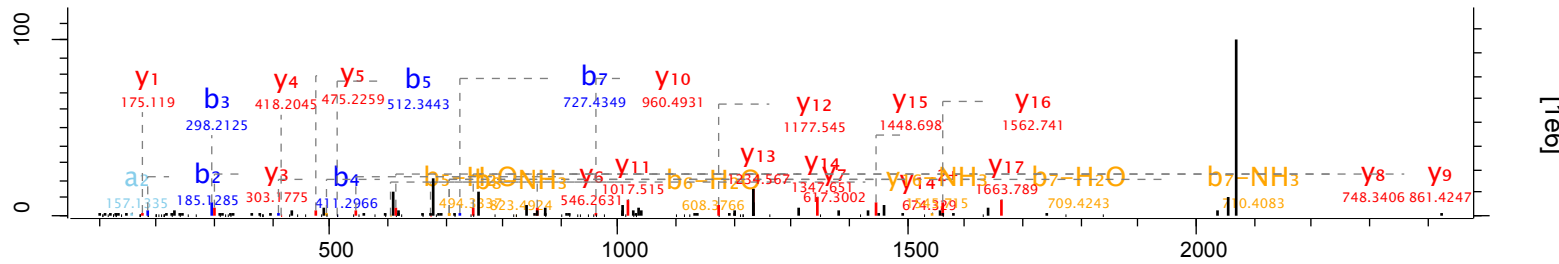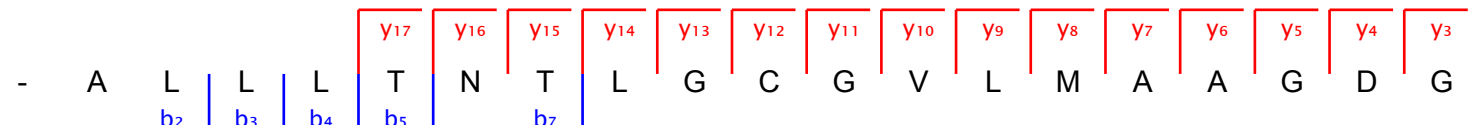

| Raw file                                   | Scan  | Method    | Score | m/z    | Gene names |
|--------------------------------------------|-------|-----------|-------|--------|------------|
| 20121216_EXQ1_AtDe_50CM_LFQ_myotubes_OG3_7 | 64907 | FTMS; HCD | 62.79 | 692.03 | Mpv17l2    |

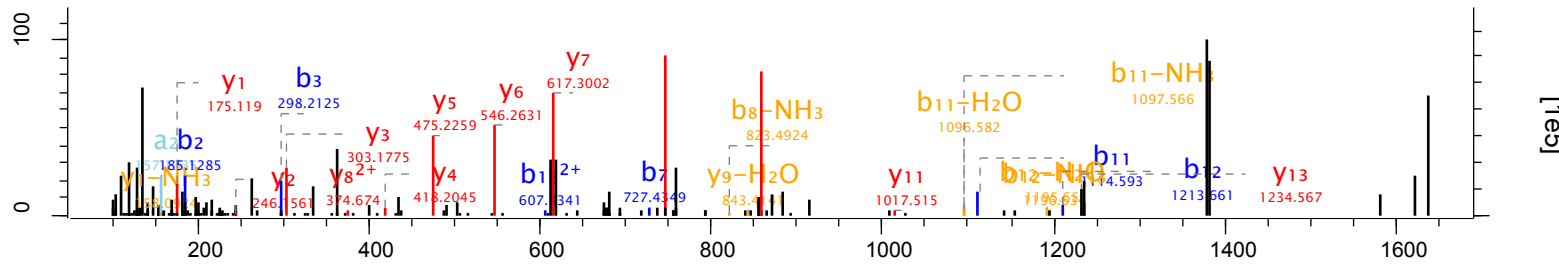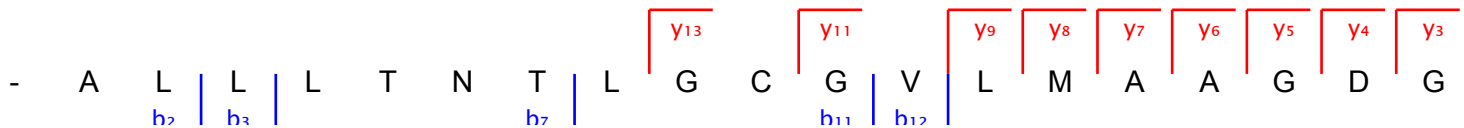

| Raw file                                   | Scan  | Method    | Score  | m/z    | Gene names |
|--------------------------------------------|-------|-----------|--------|--------|------------|
| 20121216_EXQ1_AtDe_50CM_LFQ_myotubes_OG3_7 | 66286 | FTMS; HCD | 115.65 | 715.91 | Uqcr11     |

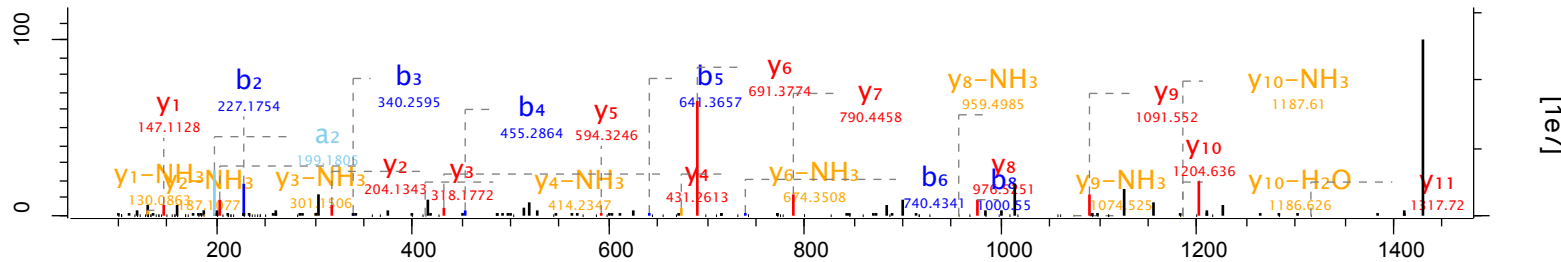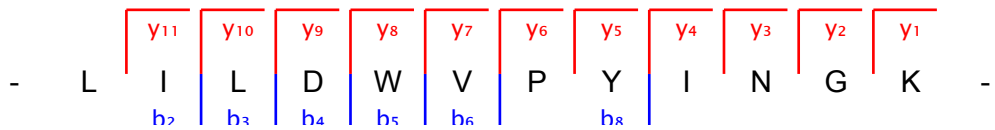

| Raw file                                   | Scan  | Method    | Score | m/z    | Gene names |
|--------------------------------------------|-------|-----------|-------|--------|------------|
| 20121216_EXQ1_AtDe_50CM_LFQ_myotubes_OG3_7 | 67447 | FTMS; HCD | 85.91 | 729.93 | Snrnp35    |

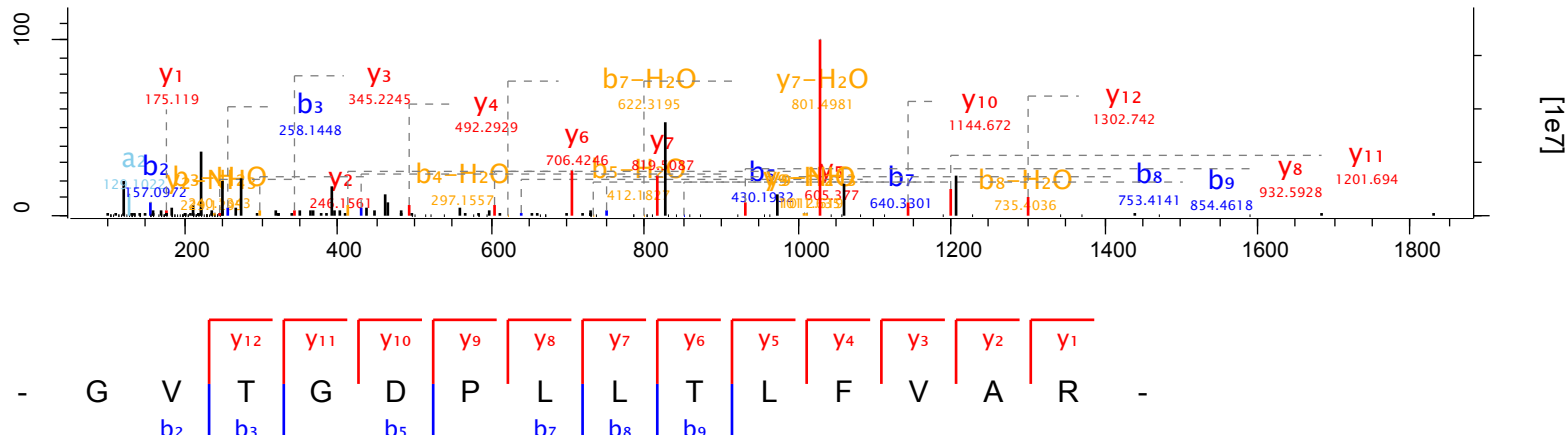



| Raw file                                   | Scan  | Method    | Score  | m/z | Gene names |
|--------------------------------------------|-------|-----------|--------|-----|------------|
| 20121216_EXQ1_AtDe_50CM_LFQ_myotubes_OG3_7 | 68506 | FTMS; HCD | 143.64 | 853 | Gemin7     |

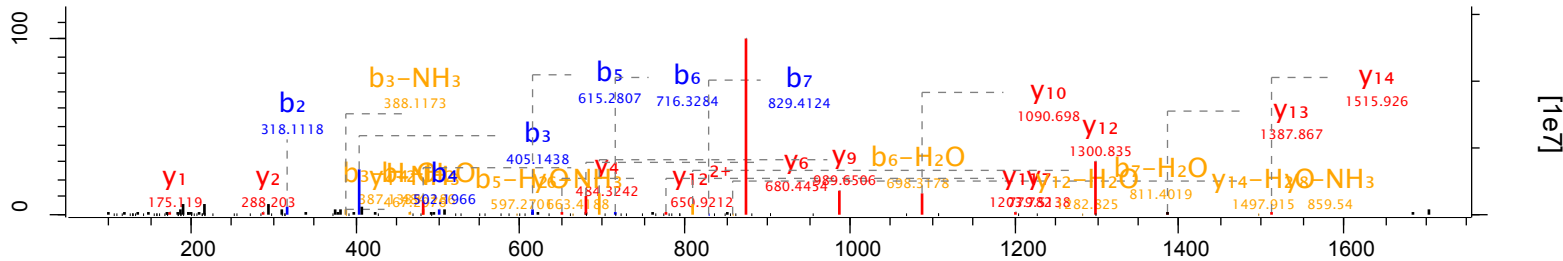

| ac | ox | y14 | y13 | y12 | y11 | y10 | y9 | y8 | y7 | y6 | y4 | y2 | y1 |
|----|----|-----|-----|-----|-----|-----|----|----|----|----|----|----|----|
| -  | M  | Q   | S   | P   | L   | T   | I  | P  | V  | P  | V  | L  | R  |
|    |    | b2  | b3  | b4  | b5  | b6  | b7 |    |    |    |    |    |    |

| Raw file                                   | Scan  | Method    | Score  | m/z    | Gene names |
|--------------------------------------------|-------|-----------|--------|--------|------------|
| 20121216_EXQ1_AtDe_50CM_LFQ_myotubes_OG3_8 | 18930 | FTMS; HCD | 110.98 | 667.88 | Gins2      |

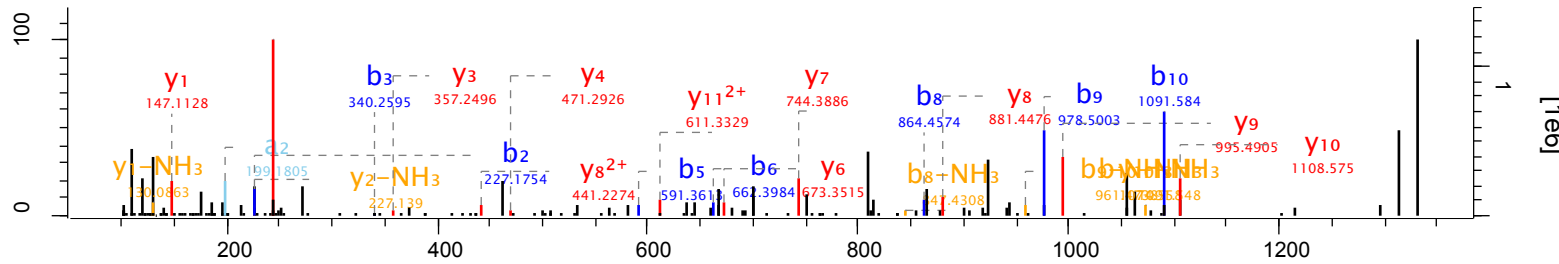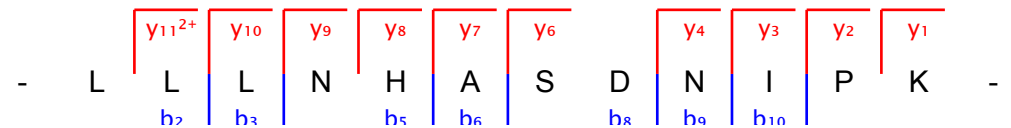

| Raw file                                   | Scan  | Method    | Score | m/z    | Gene names |
|--------------------------------------------|-------|-----------|-------|--------|------------|
| 20121216_EXQ1_AtDe_50CM_LFQ_myotubes_OG3_8 | 22098 | FTMS; HCD | 102.9 | 705.33 | Vkorc1     |

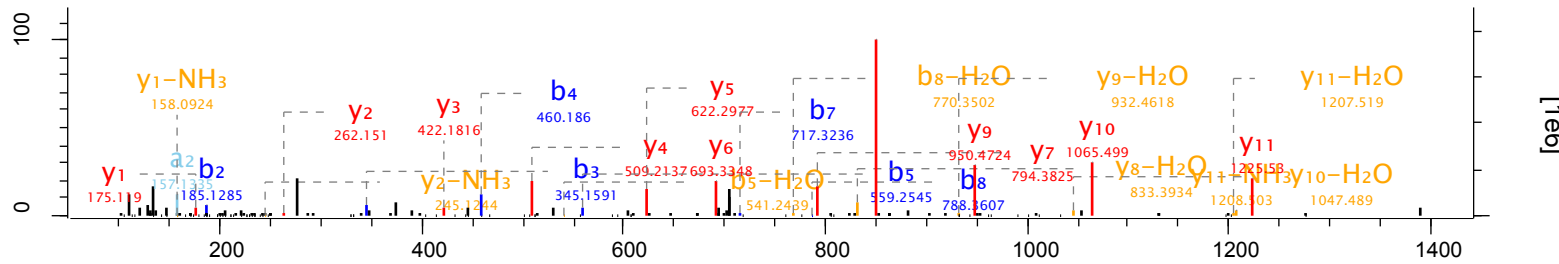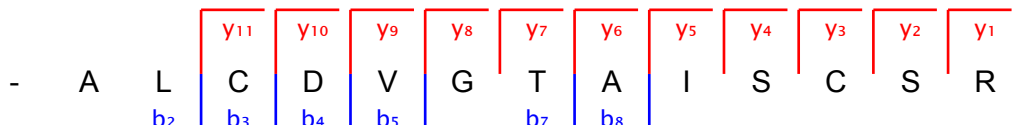

| Raw file                                   | Scan  | Method    | Score | m/z    | Gene names |
|--------------------------------------------|-------|-----------|-------|--------|------------|
| 20121216_EXQ1_AtDe_50CM_LFQ_myotubes_OG3_8 | 26005 | FTMS; HCD | 64.98 | 488.01 | Plekha5    |

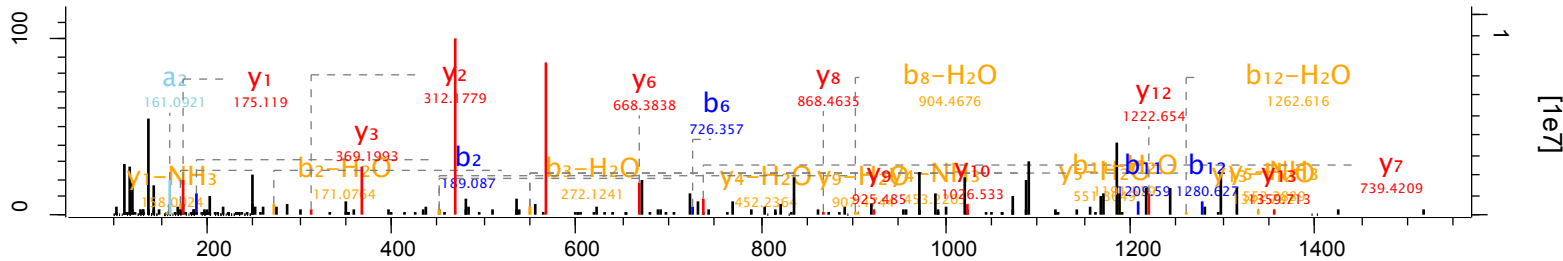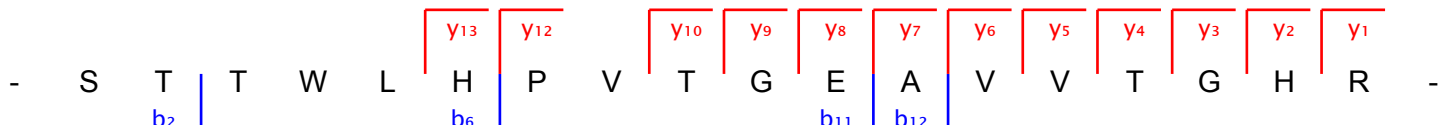

| Raw file                                   | Scan  | Method    | Score  | m/z    | Gene names |
|--------------------------------------------|-------|-----------|--------|--------|------------|
| 20121216_EXQ1_AtDe_50CM_LFQ_myotubes_OG3_8 | 27138 | FTMS; HCD | 104.22 | 407.58 | Pex26      |

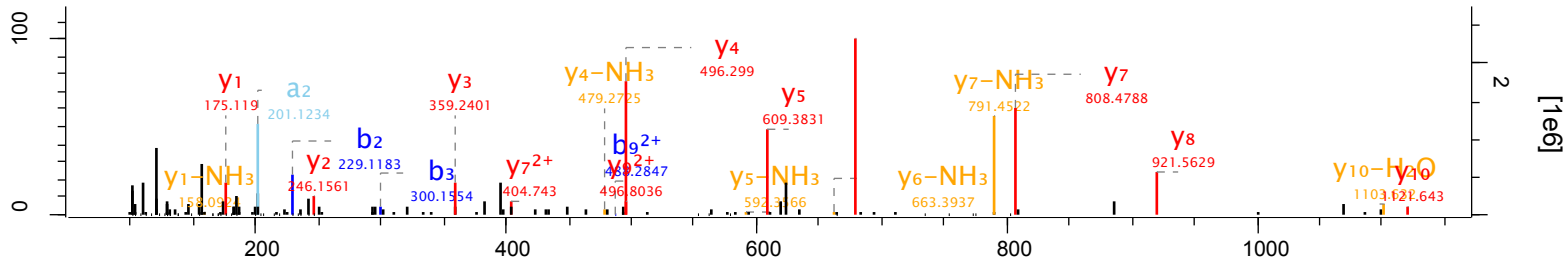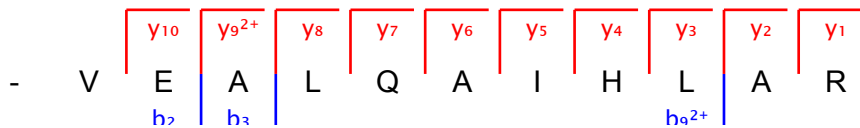

| Raw file                                   | Scan  | Method    | Score | m/z    | Gene names |
|--------------------------------------------|-------|-----------|-------|--------|------------|
| 20121216_EXQ1_AtDe_50CM_LFQ_myotubes_OG3_8 | 29788 | FTMS; HCD | 98.06 | 856.92 | Gpr137b    |

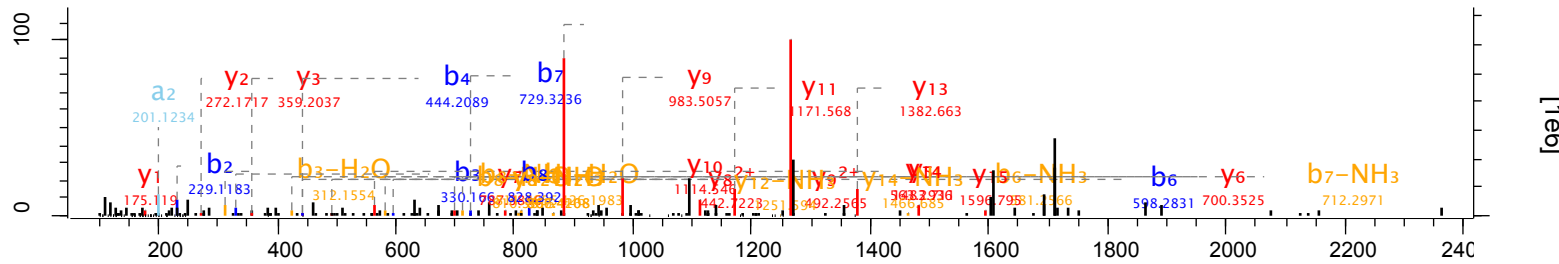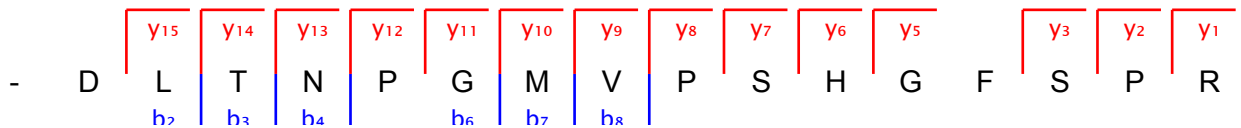

| Raw file                                   | Scan  | Method    | Score | m/z    | Gene names |
|--------------------------------------------|-------|-----------|-------|--------|------------|
| 20121216_EXQ1_AtDe_50CM_LFQ_myotubes_OG3_8 | 34692 | FTMS; HCD | 53.21 | 671.01 | Oaz2       |

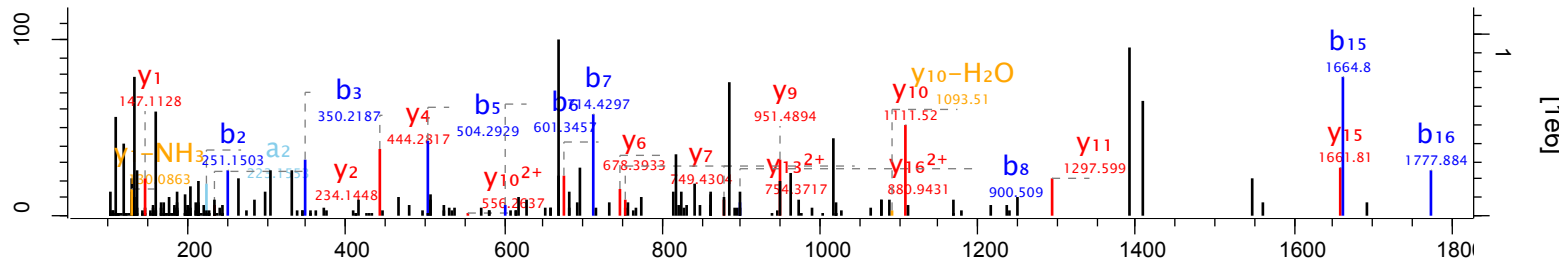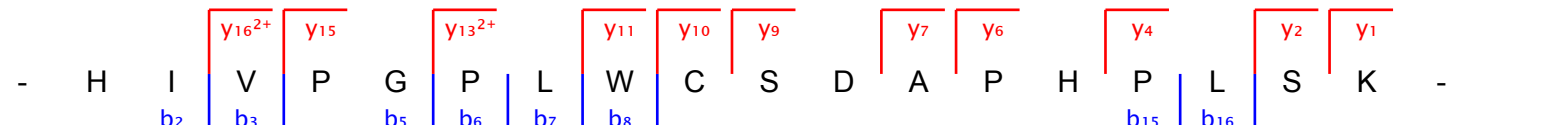

| Raw file                                   | Scan  | Method    | Score | m/z    | Gene names |
|--------------------------------------------|-------|-----------|-------|--------|------------|
| 20121216_EXQ1_AtDe_50CM_LFQ_myotubes_OG3_8 | 36128 | FTMS; HCD | 41.69 | 459.75 | Rhof       |

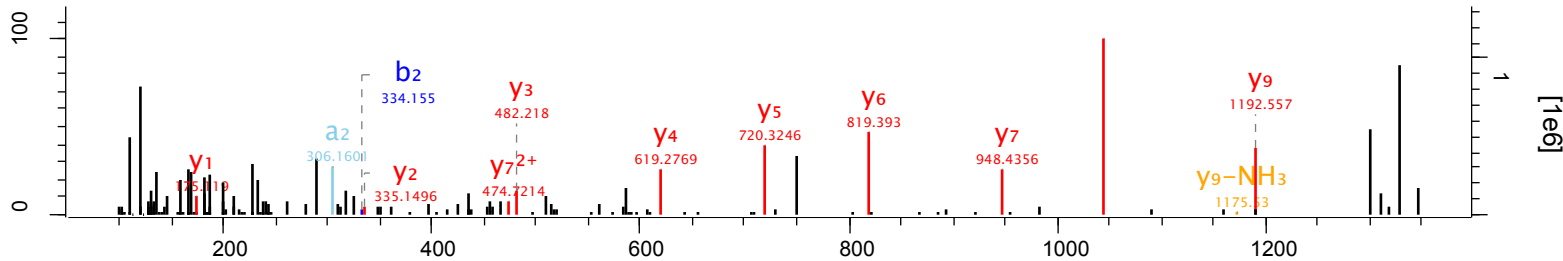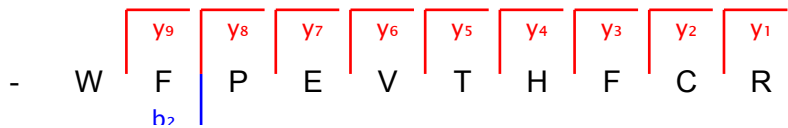



| Raw file                                   | Scan  | Method    | Score | m/z  | Gene names |
|--------------------------------------------|-------|-----------|-------|------|------------|
| 20121216_EXQ1_AtDe_50CM_LFQ_myotubes_OG3_8 | 36846 | FTMS; HCD | 85.8  | 1038 | Poc1a      |

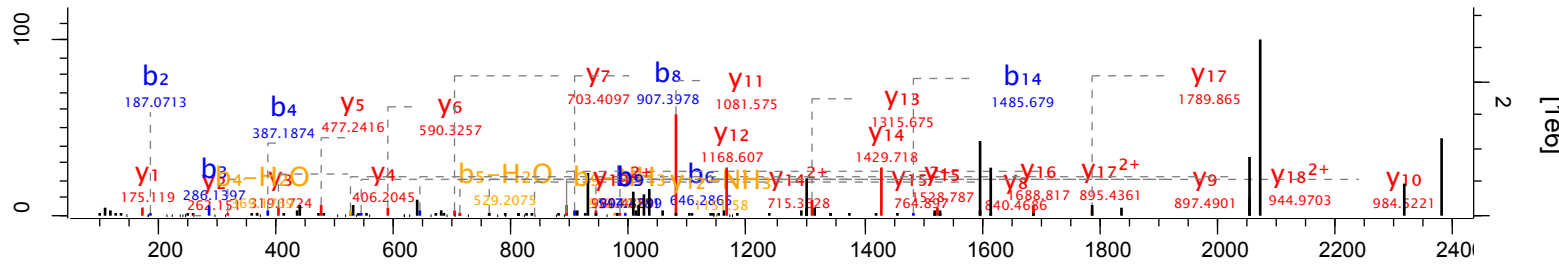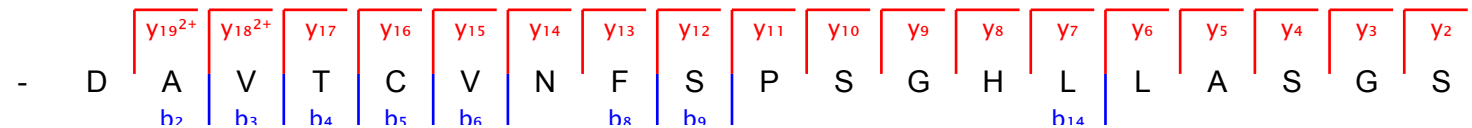

| Raw file                                   | Scan  | Method    | Score | m/z    | Gene names |
|--------------------------------------------|-------|-----------|-------|--------|------------|
| 20121216_EXQ1_AtDe_50CM_LFQ_myotubes_OG3_8 | 39755 | FTMS; HCD | 41.09 | 584.33 | Sema6b     |

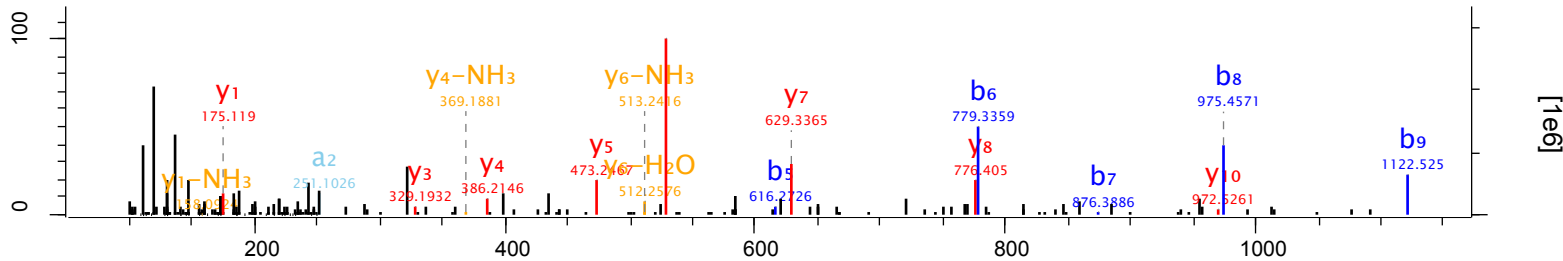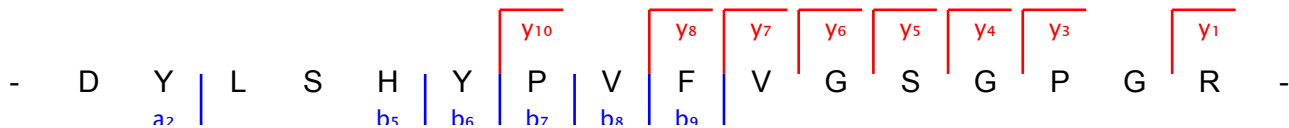

| Raw file                                   | Scan  | Method    | Score | m/z    | Gene names |
|--------------------------------------------|-------|-----------|-------|--------|------------|
| 20121216_EXQ1_AtDe_50CM_LFQ_myotubes_OG3_8 | 39791 | FTMS; HCD | 58.71 | 876.44 | Sema6b     |

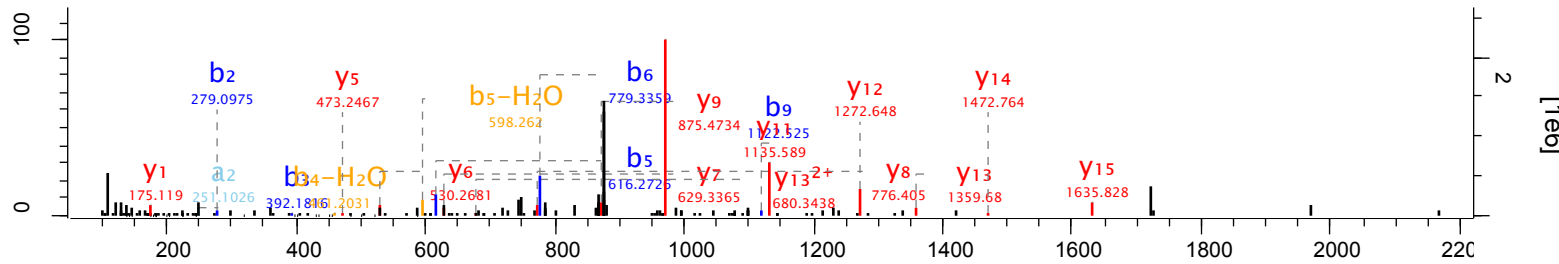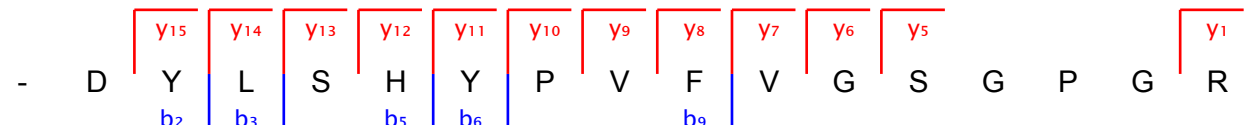

| Raw file                                   | Scan  | Method    | Score | m/z    | Gene names |
|--------------------------------------------|-------|-----------|-------|--------|------------|
| 20121216_EXQ1_AtDe_50CM_LFQ_myotubes_OG3_8 | 41723 | FTMS; HCD | 56.57 | 565.98 | Zbtb34     |

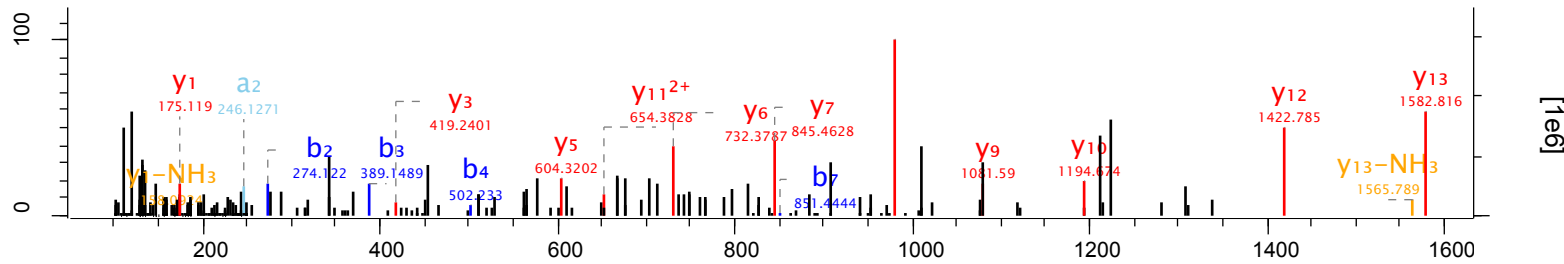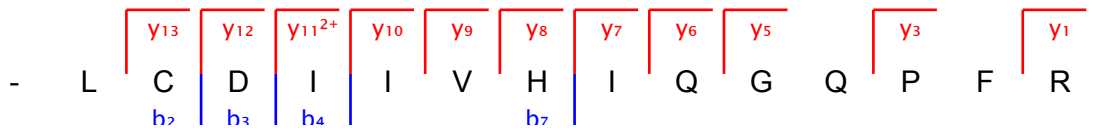

| Raw file                                   | Scan  | Method    | Score | m/z    | Gene names |
|--------------------------------------------|-------|-----------|-------|--------|------------|
| 20121216_EXQ1_AtDe_50CM_LFQ_myotubes_OG3_8 | 43255 | FTMS; HCD | 52.58 | 689.35 | Il18       |

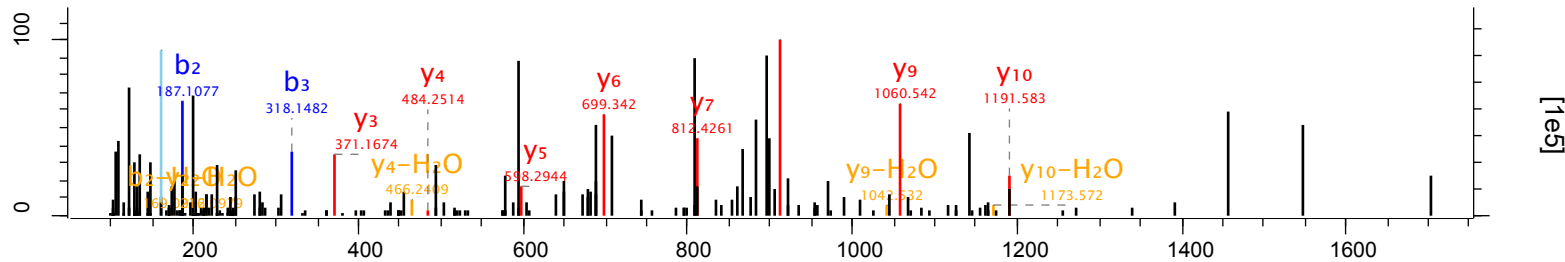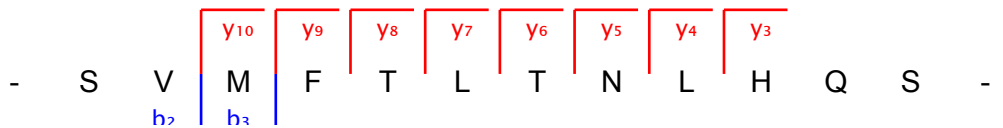

| Raw file                                   | Scan  | Method    | Score  | m/z    | Gene names |
|--------------------------------------------|-------|-----------|--------|--------|------------|
| 20121216_EXQ1_AtDe_50CM_LFQ_myotubes_OG3_8 | 43307 | FTMS; HCD | 108.72 | 689.85 | II18       |

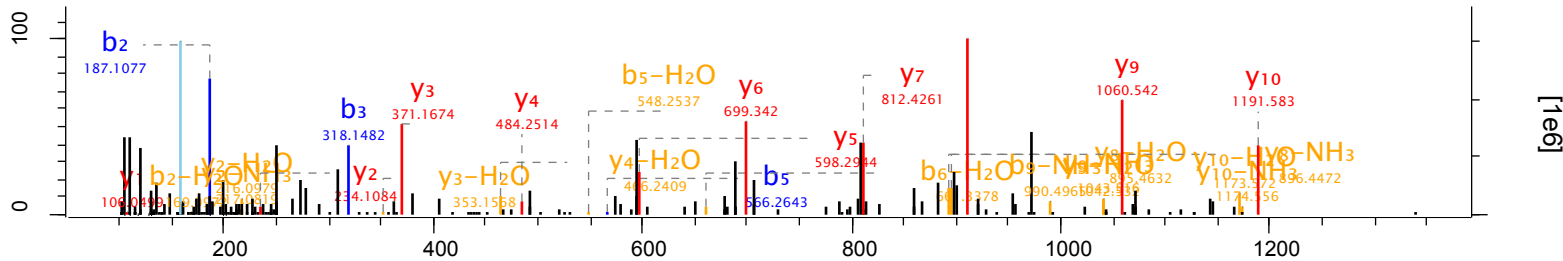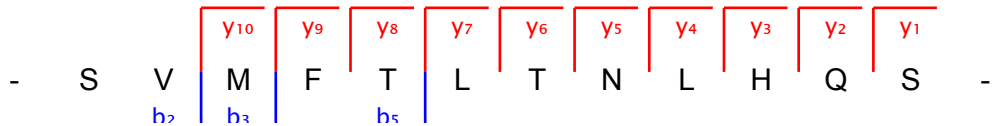

| Raw file                                   | Scan  | Method    | Score | m/z   | Gene names |
|--------------------------------------------|-------|-----------|-------|-------|------------|
| 20121216_EXQ1_AtDe_50CM_LFQ_myotubes_OG3_8 | 44133 | FTMS; HCD | 78.61 | 541.3 | Def8       |

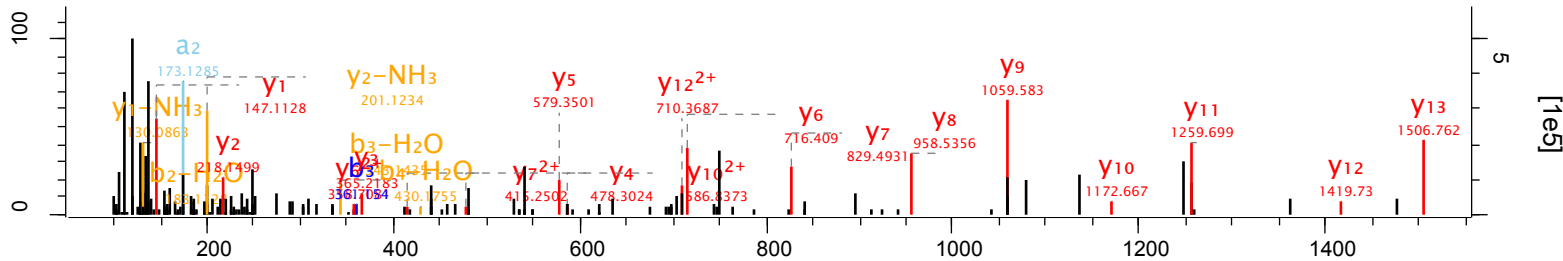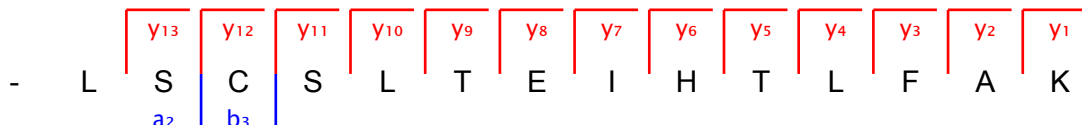

Raw file

20121216\_EXQ1\_AtDe\_50CM\_LFQ\_myotubes\_OG3\_8

Scan

45261

Method

FTMS; HCD

Score

72.32

m/z

554.29

Gene names

Dhrs9

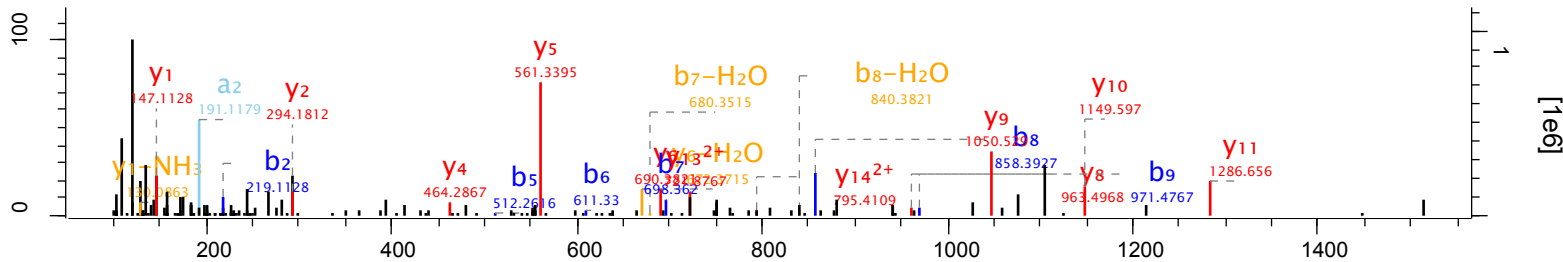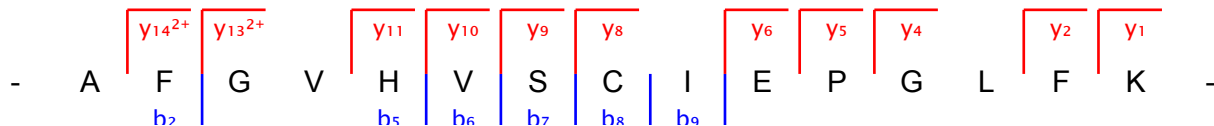



| Raw file                                   | Scan  | Method    | Score | m/z    | Gene names |
|--------------------------------------------|-------|-----------|-------|--------|------------|
| 20121216_EXQ1_AtDe_50CM_LFQ_myotubes_OG3_8 | 46521 | FTMS; HCD | 94.63 | 712.68 | Asx11      |

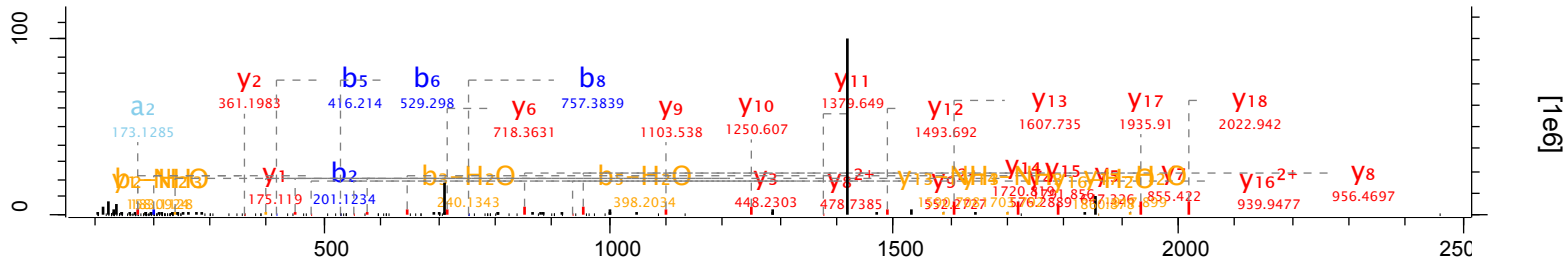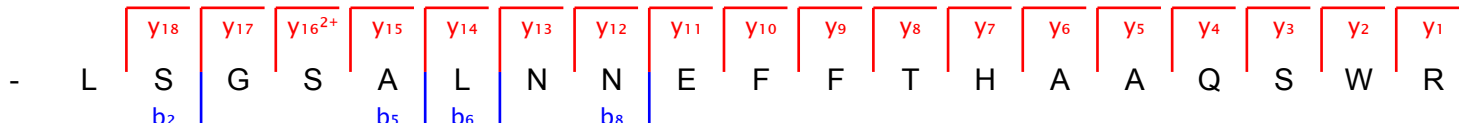

| Raw file                                   | Scan  | Method    | Score  | m/z    | Gene names |
|--------------------------------------------|-------|-----------|--------|--------|------------|
| 20121216_EXQ1_AtDe_50CM_LFQ_myotubes_OG3_8 | 48429 | FTMS; HCD | 115.73 | 912.98 | Tmem37     |

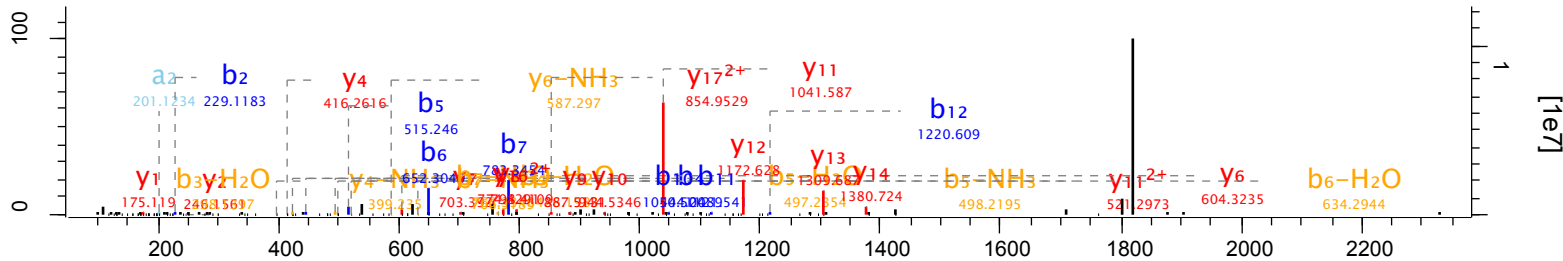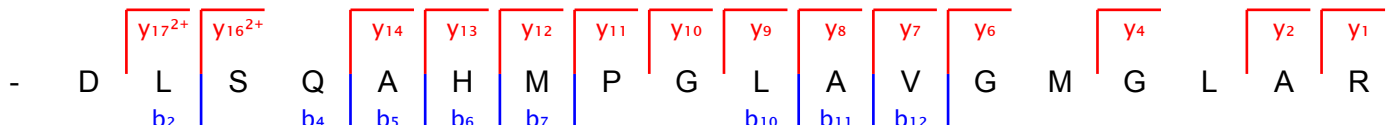

| Raw file                                   | Scan  | Method    | Score | m/z    | Gene names |
|--------------------------------------------|-------|-----------|-------|--------|------------|
| 20121216_EXQ1_AtDe_50CM_LFQ_myotubes_OG3_8 | 48464 | FTMS; HCD | 99.11 | 608.65 | Tmem37     |

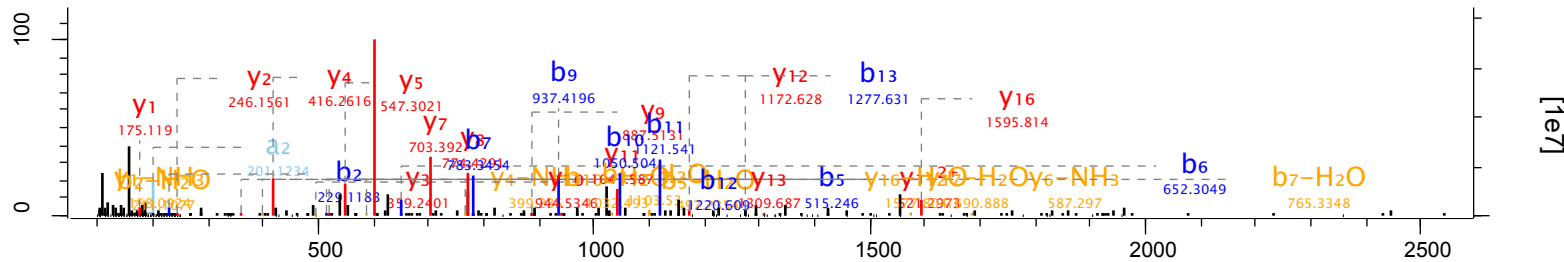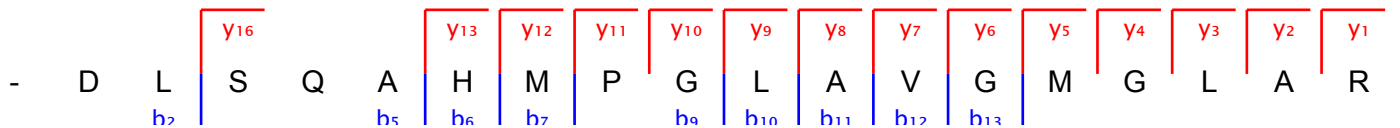

| Raw file                                   | Scan  | Method    | Score | m/z    | Gene names |
|--------------------------------------------|-------|-----------|-------|--------|------------|
| 20121216_EXQ1_AtDe_50CM_LFQ_myotubes_OG3_8 | 48563 | FTMS; HCD | 52.37 | 578.66 | Mblac1     |

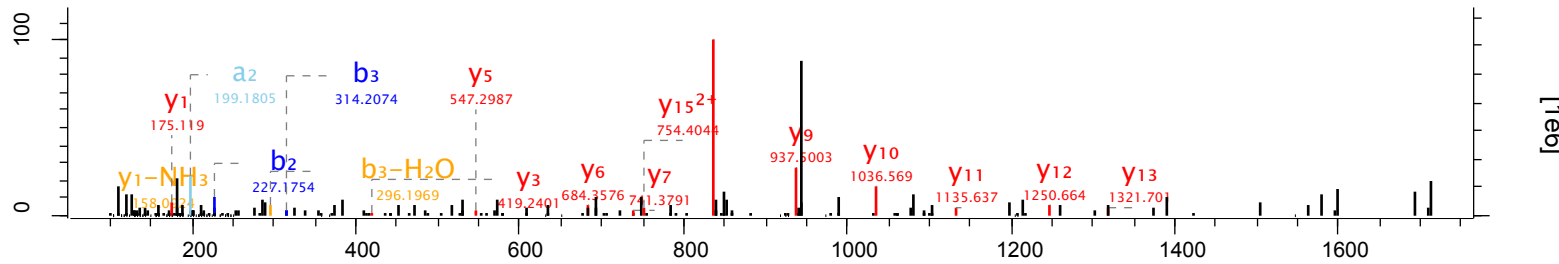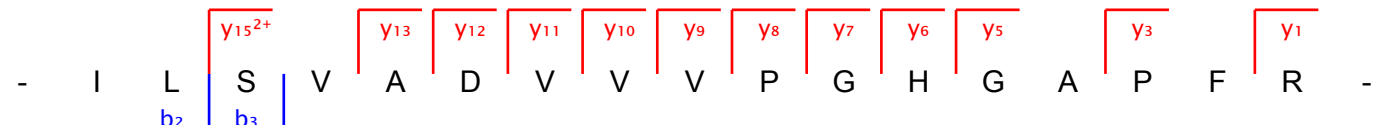

| Raw file                                   | Scan  | Method    | Score | m/z    | Gene names |
|--------------------------------------------|-------|-----------|-------|--------|------------|
| 20121216_EXQ1_AtDe_50CM_LFQ_myotubes_OG3_8 | 48598 | FTMS; HCD | 64.48 | 867.49 | Mblac1     |

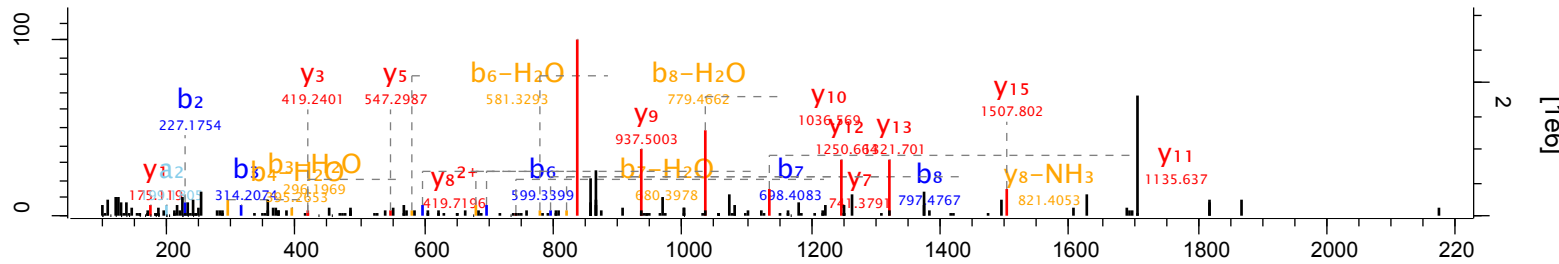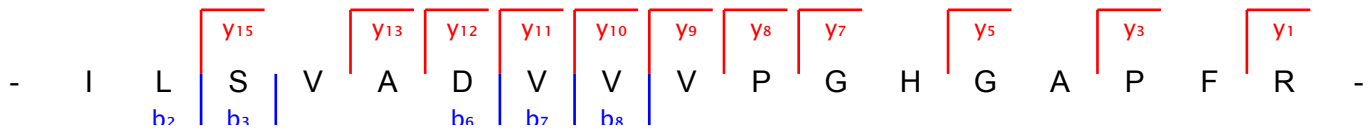

| Raw file                                   | Scan  | Method    | Score | m/z    | Gene names |
|--------------------------------------------|-------|-----------|-------|--------|------------|
| 20121216_EXQ1_AtDe_50CM_LFQ_myotubes_OG3_8 | 51915 | FTMS; HCD | 75.05 | 822.41 | Xrcc3      |

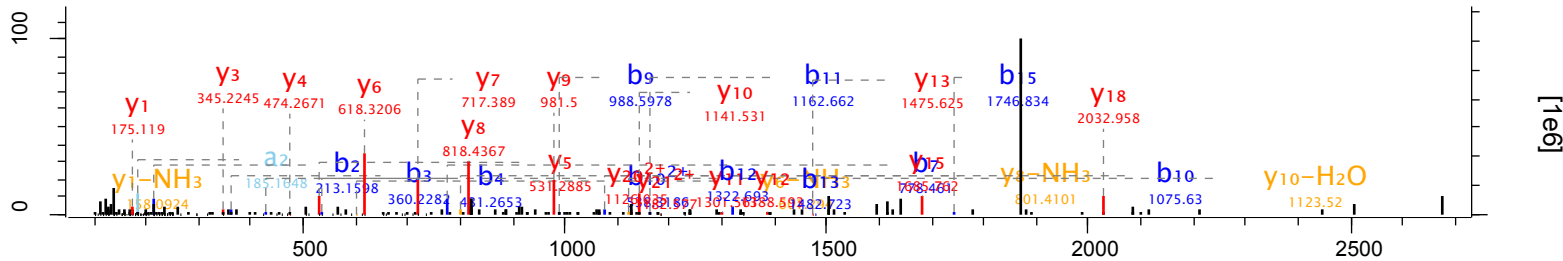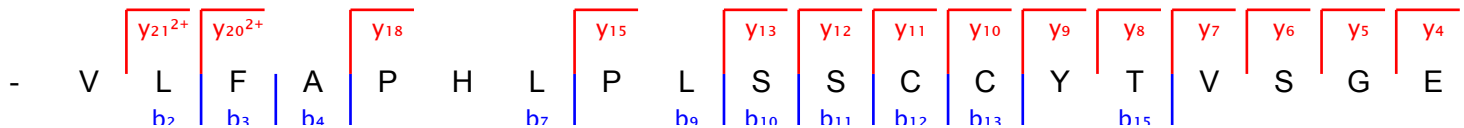

| Raw file                                   | Scan  | Method    | Score | m/z    | Gene names          |
|--------------------------------------------|-------|-----------|-------|--------|---------------------|
| 20121216_EXQ1_AtDe_50CM_LFQ_myotubes_OG3_8 | 52410 | FTMS; HCD | 89.91 | 569.34 | Kiaa0556;D430042O09 |

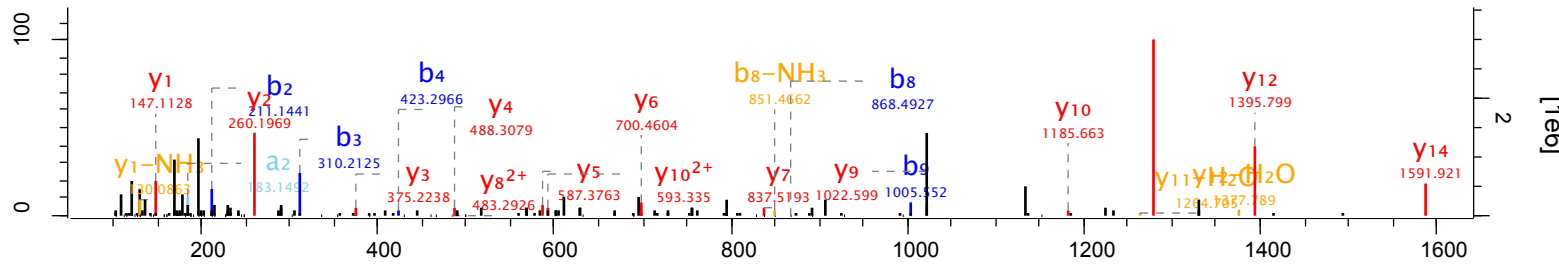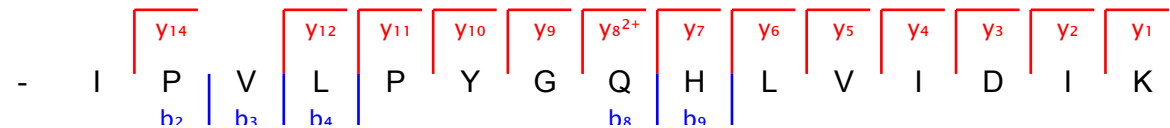

| Raw file                                   | Scan  | Method    | Score  | m/z    | Gene names |
|--------------------------------------------|-------|-----------|--------|--------|------------|
| 20121216_EXQ1_AtDe_50CM_LFQ_myotubes_OG3_8 | 52779 | FTMS; HCD | 102.64 | 813.96 | Plac8      |

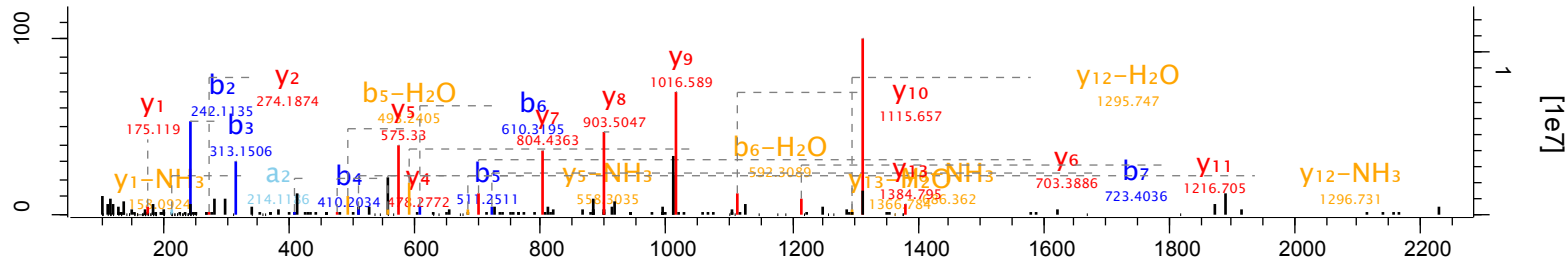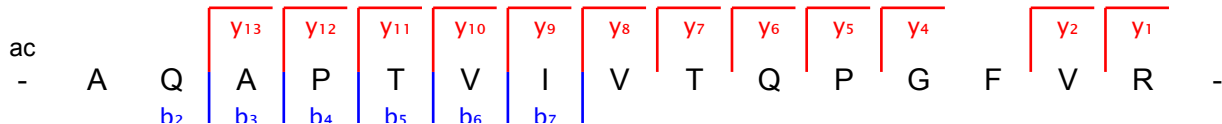



| Raw file                                   | Scan  | Method    | Score | m/z    | Gene names |
|--------------------------------------------|-------|-----------|-------|--------|------------|
| 20121216_EXQ1_AtDe_50CM_LFQ_myotubes_OG3_8 | 53632 | FTMS; HCD | 50.78 | 855.13 | Ubox5      |

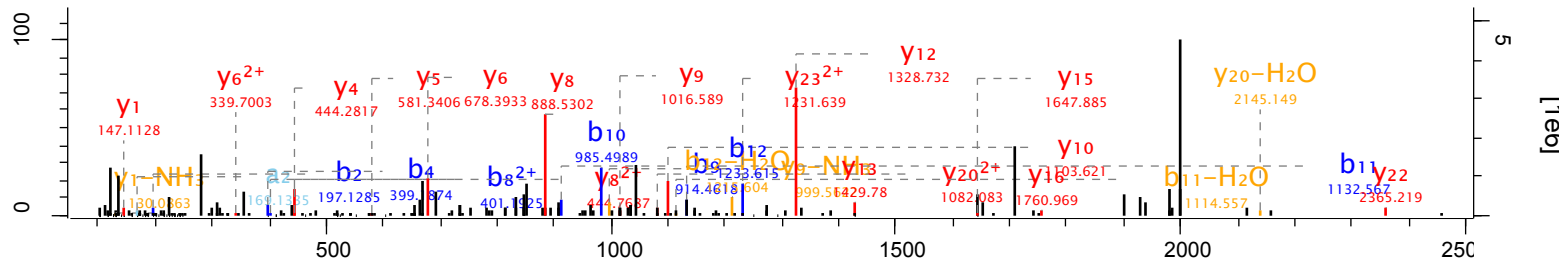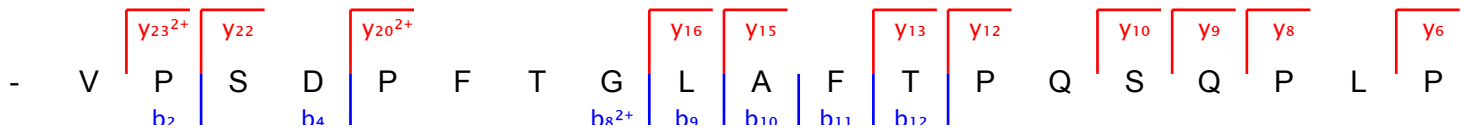

| Raw file                                   | Scan  | Method    | Score | m/z    | Gene names |
|--------------------------------------------|-------|-----------|-------|--------|------------|
| 20121216_EXQ1_AtDe_50CM_LFQ_myotubes_OG3_8 | 54950 | FTMS; HCD | 68.58 | 615.36 | Gm8113     |

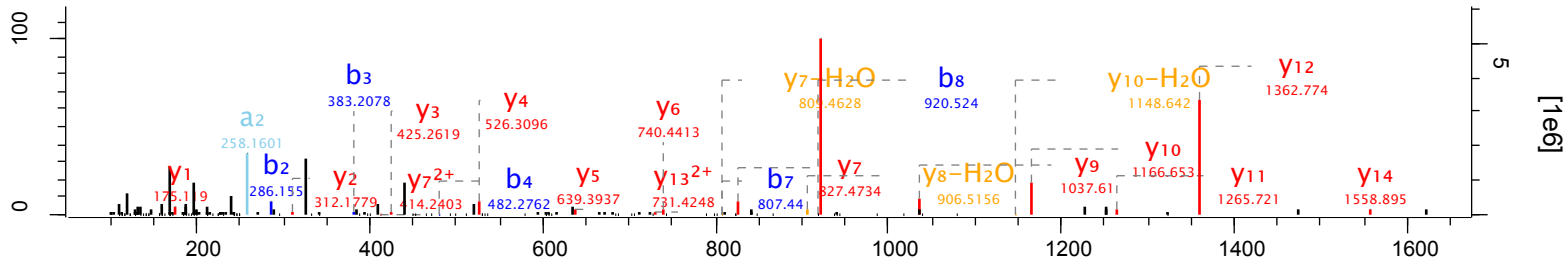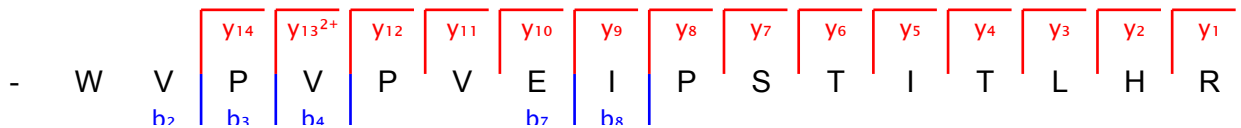

| Raw file                                   | Scan  | Method    | Score | m/z    | Gene names |
|--------------------------------------------|-------|-----------|-------|--------|------------|
| 20121216_EXQ1_AtDe_50CM_LFQ_myotubes_OG3_8 | 55815 | FTMS; HCD | 80.12 | 1027.2 | Dusp9      |

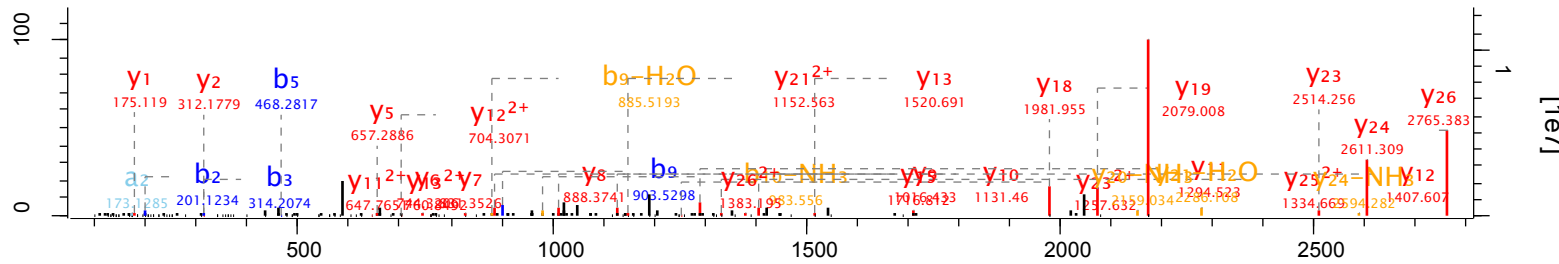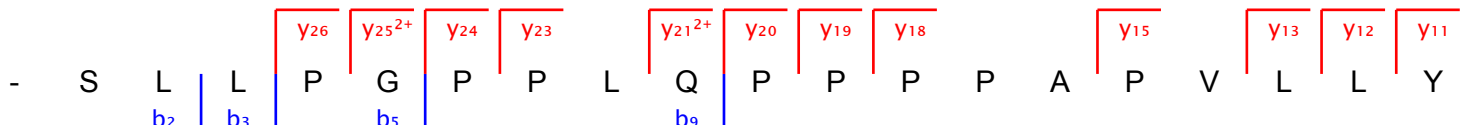

| Raw file                                   | Scan  | Method    | Score | m/z    | Gene names |
|--------------------------------------------|-------|-----------|-------|--------|------------|
| 20121216_EXQ1_AtDe_50CM_LFQ_myotubes_OG3_8 | 59796 | FTMS; HCD | 77.78 | 564.69 | Smim11     |

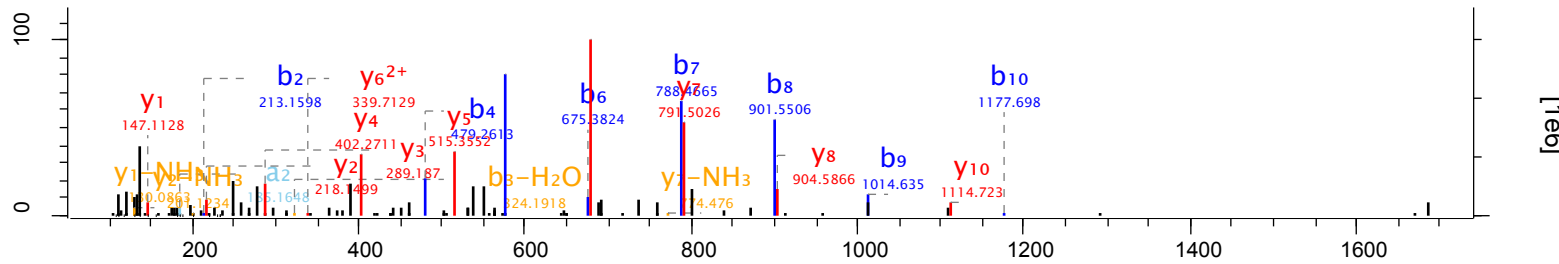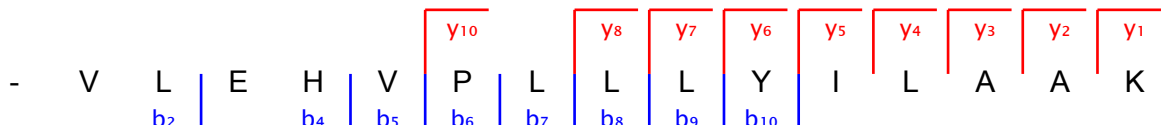

[1e6]

| Raw file                                   | Scan  | Method    | Score | m/z    | Gene names |
|--------------------------------------------|-------|-----------|-------|--------|------------|
| 20121216_EXQ1_AtDe_50CM_LFQ_myotubes_OG3_8 | 59827 | FTMS; HCD | 152   | 846.54 | Smim11     |

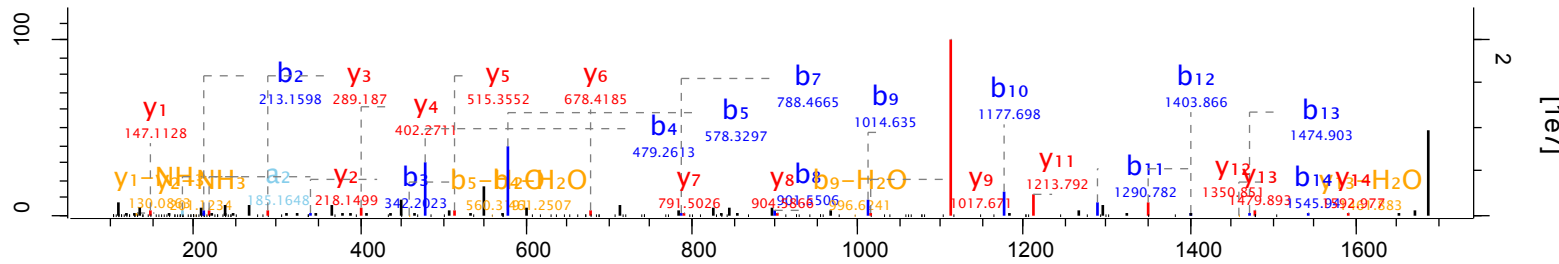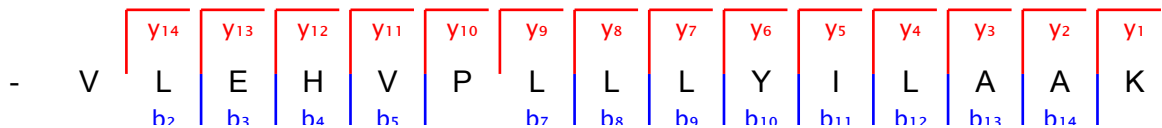

| Raw file                                   | Scan  | Method    | Score | m/z   | Gene names |
|--------------------------------------------|-------|-----------|-------|-------|------------|
| 20121216_EXQ1_AtDe_50CM_LFQ_myotubes_OG3_8 | 60266 | FTMS; HCD | 113.4 | 853.5 | Gemin7     |

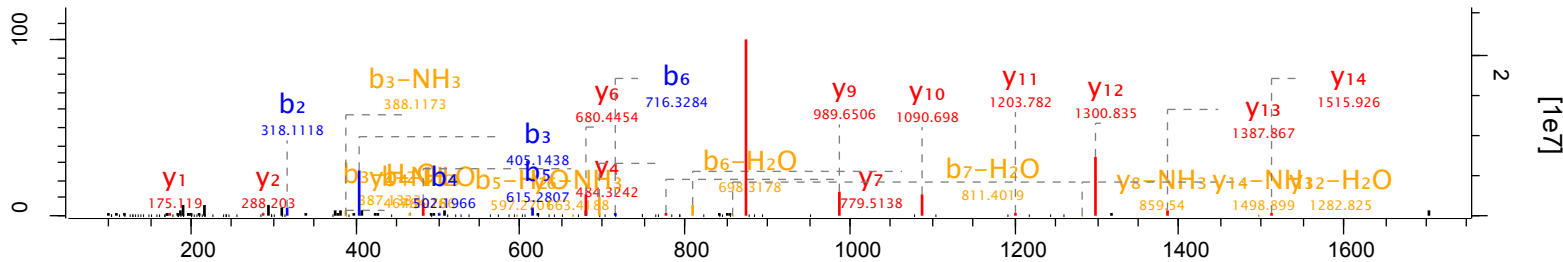

| ac | ox | y14 | y13 | y12 | y11 | y10 | y9 | y8 | y7 | y6 | y4 | y2 | y1 |
|----|----|-----|-----|-----|-----|-----|----|----|----|----|----|----|----|
| -  | M  | Q   | S   | P   | L   | T   | I  | P  | V  | P  | V  | L  | R  |
|    |    | b2  | b3  | b4  | b5  | b6  |    |    |    |    |    |    |    |

| Raw file                                   | Scan  | Method    | Score | m/z    | Gene names |
|--------------------------------------------|-------|-----------|-------|--------|------------|
| 20121216_EXQ1_AtDe_50CM_LFQ_myotubes_OG3_9 | 11290 | FTMS; HCD | 49.48 | 491.49 | Zfp943     |

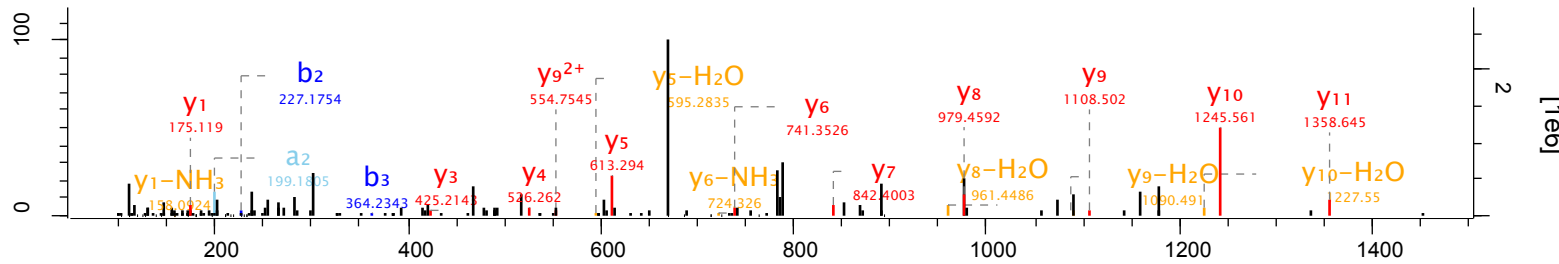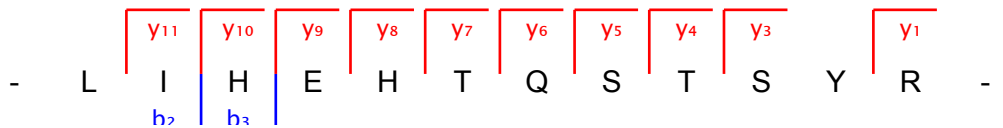

| Raw file                                   | Scan  | Method    | Score  | m/z    | Gene names |
|--------------------------------------------|-------|-----------|--------|--------|------------|
| 20121216_EXQ1_AtDe_50CM_LFQ_myotubes_OG3_9 | 12717 | FTMS; HCD | 145.31 | 465.92 | Pmepa1     |

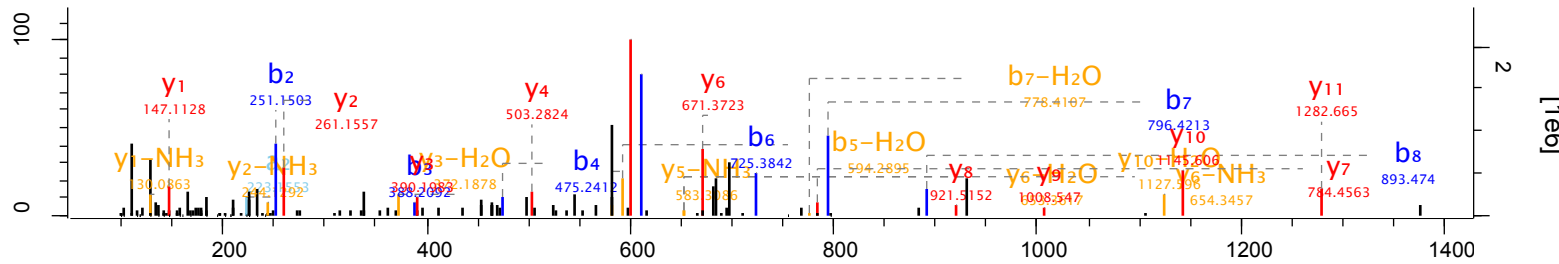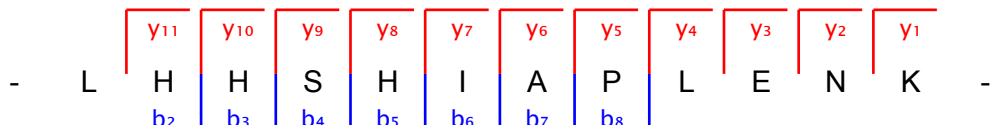



| Raw file                                   | Scan  | Method    | Score  | m/z    | Gene names |
|--------------------------------------------|-------|-----------|--------|--------|------------|
| 20121216_EXQ1_AtDe_50CM_LFQ_myotubes_OG3_9 | 12731 | FTMS; HCD | 157.22 | 698.38 | Pmepa1     |

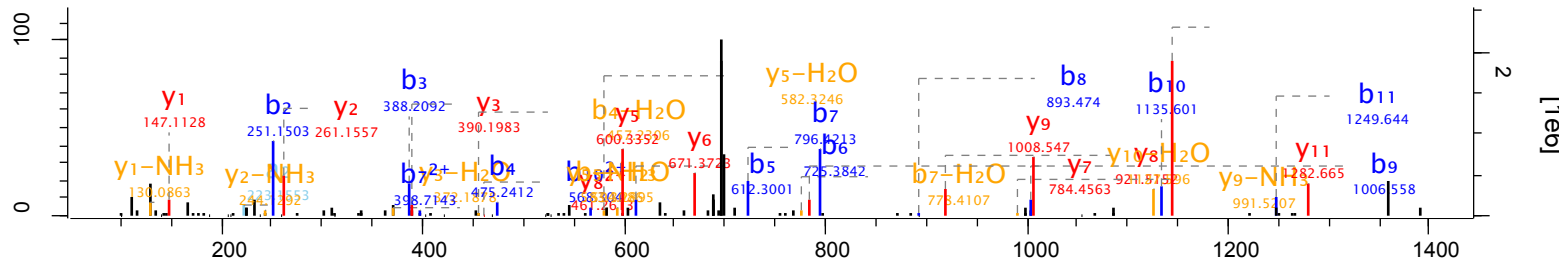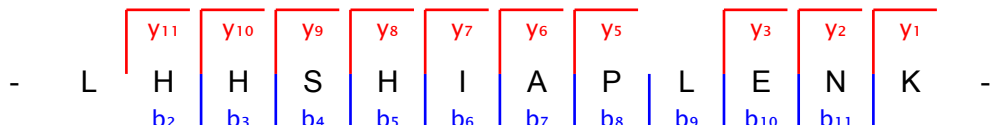

| Raw file                                   | Scan  | Method    | Score | m/z    | Gene names |
|--------------------------------------------|-------|-----------|-------|--------|------------|
| 20121216_EXQ1_AtDe_50CM_LFQ_myotubes_OG3_9 | 12743 | FTMS; HCD | 51.57 | 349.94 | Pmepa1     |

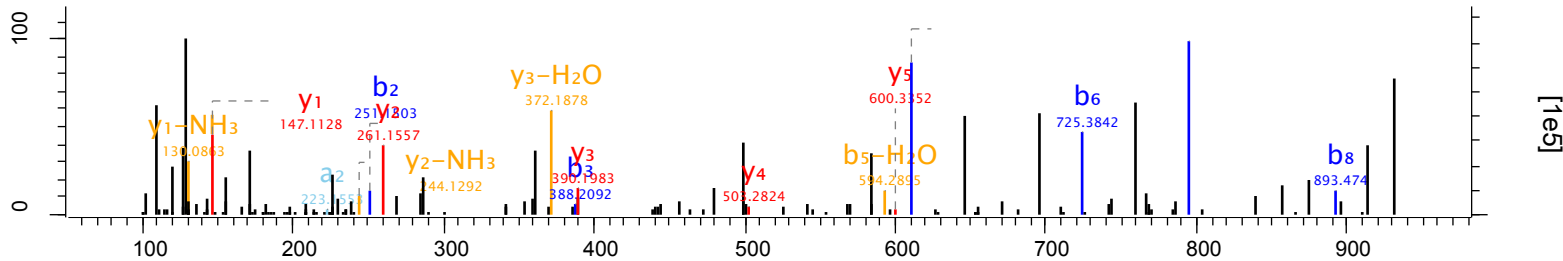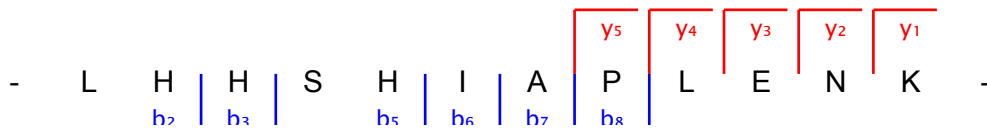

| Raw file                                   | Scan  | Method    | Score | m/z    | Gene names |
|--------------------------------------------|-------|-----------|-------|--------|------------|
| 20121216_EXQ1_AtDe_50CM_LFQ_myotubes_OG3_9 | 12755 | FTMS; HCD | 84.51 | 557.58 | Bivm       |

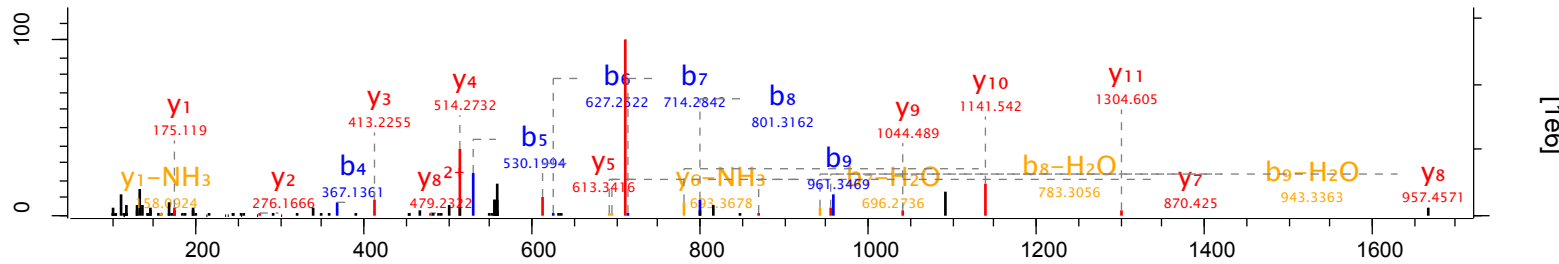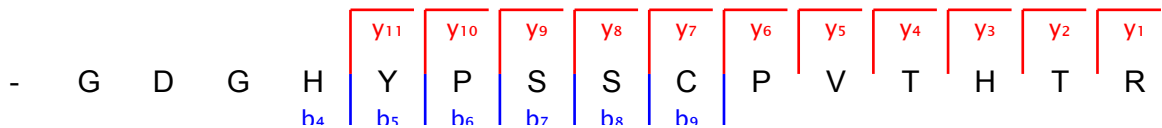

| Raw file                                   | Scan  | Method    | Score  | m/z    | Gene names |
|--------------------------------------------|-------|-----------|--------|--------|------------|
| 20121216_EXQ1_AtDe_50CM_LFQ_myotubes_OG3_9 | 13133 | FTMS; HCD | 111.12 | 524.28 | Fam131b    |

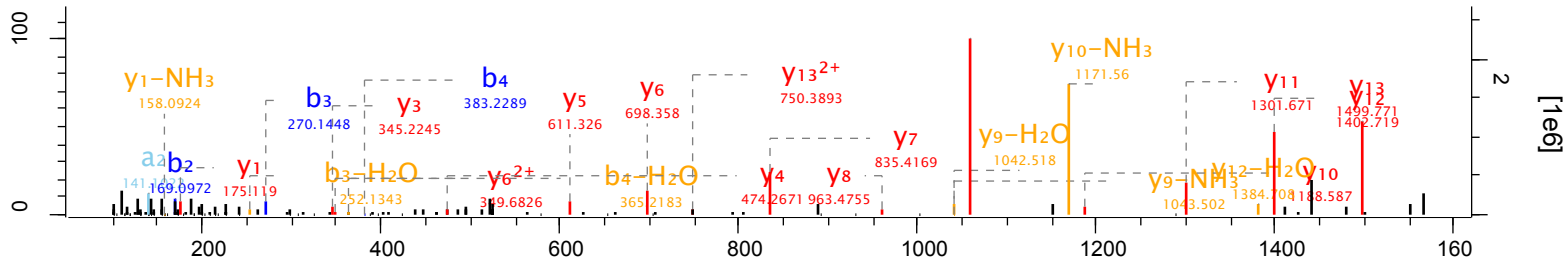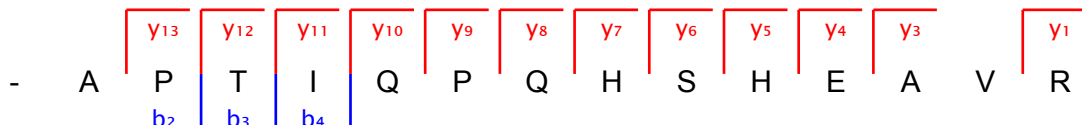

| Raw file                                   | Scan  | Method    | Score  | m/z    | Gene names  |
|--------------------------------------------|-------|-----------|--------|--------|-------------|
| 20121216_EXQ1_AtDe_50CM_LFQ_myotubes_OG3_9 | 13404 | FTMS; HCD | 226.88 | 797.91 | mt-Co3;Mtco |

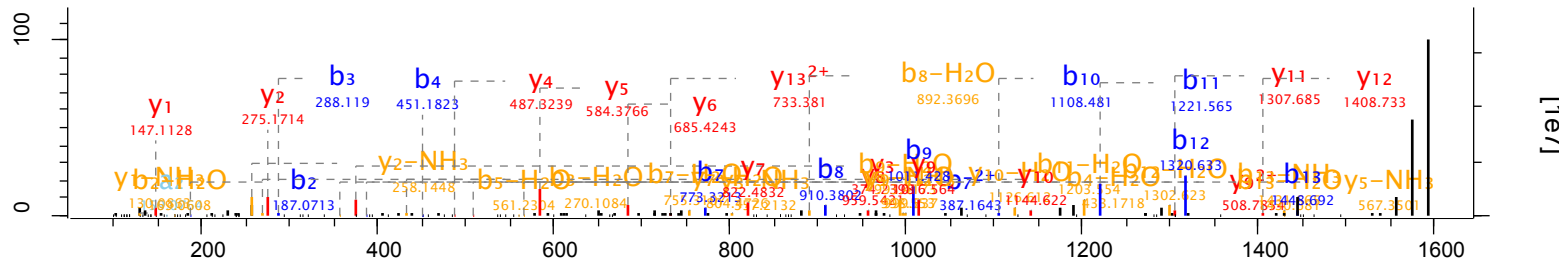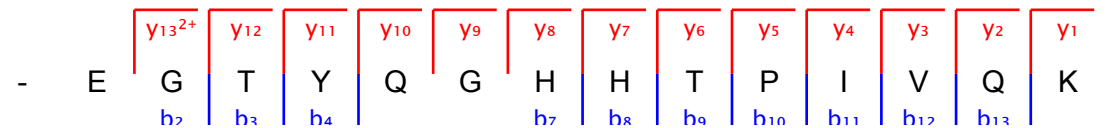

| Raw file                                   | Scan  | Method    | Score  | m/z    | Gene names  |
|--------------------------------------------|-------|-----------|--------|--------|-------------|
| 20121216_EXQ1_AtDe_50CM_LFQ_myotubes_OG3_9 | 13414 | FTMS; HCD | 128.95 | 532.27 | mt-Co3;Mtco |

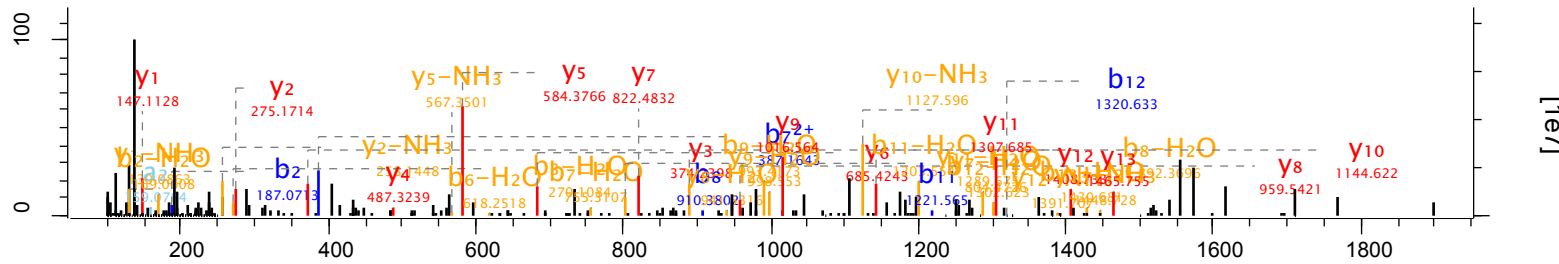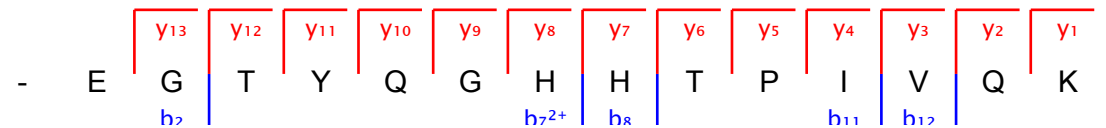

| Raw file                                   | Scan  | Method    | Score | m/z    | Gene names   |
|--------------------------------------------|-------|-----------|-------|--------|--------------|
| 20121216_EXQ1_AtDe_50CM_LFQ_myotubes_OG3_9 | 13417 | FTMS; HCD | 99.94 | 399.46 | mt-Co3;Mtco3 |

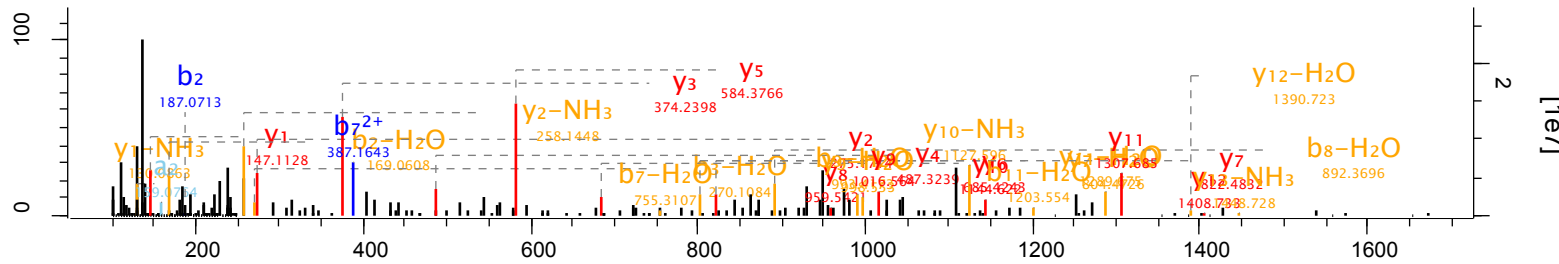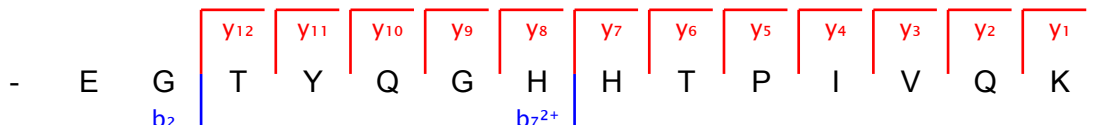

| Raw file                                   | Scan  | Method    | Score | m/z    | Gene names |
|--------------------------------------------|-------|-----------|-------|--------|------------|
| 20121216_EXQ1_AtDe_50CM_LFQ_myotubes_OG3_9 | 14773 | FTMS; HCD | 95.66 | 481.49 | Krcc1      |

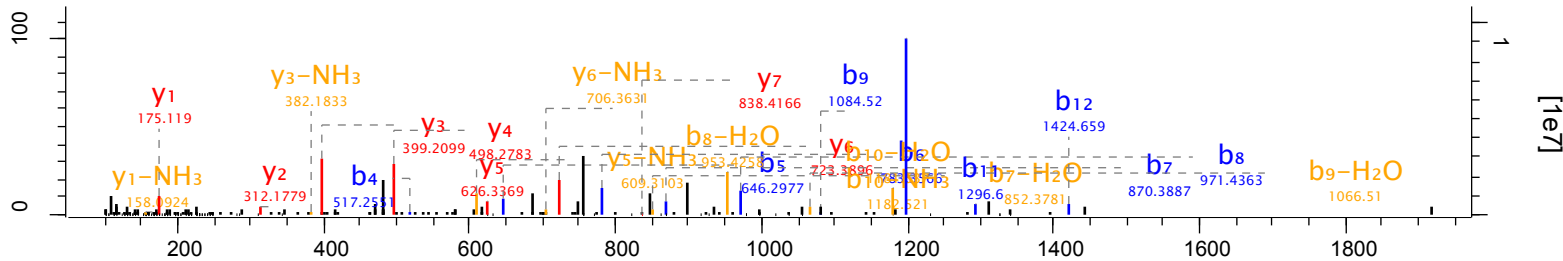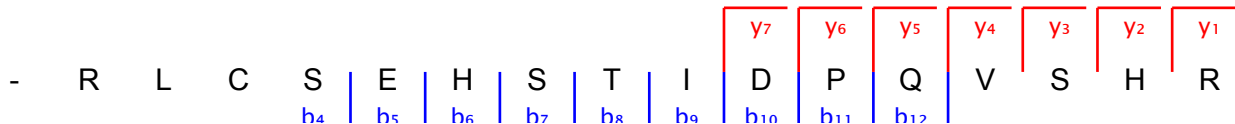



| Raw file                                   | Scan  | Method    | Score  | m/z    | Gene names |
|--------------------------------------------|-------|-----------|--------|--------|------------|
| 20121216_EXQ1_AtDe_50CM_LFQ_myotubes_OG3_9 | 17623 | FTMS; HCD | 134.13 | 660.33 | Sobp       |

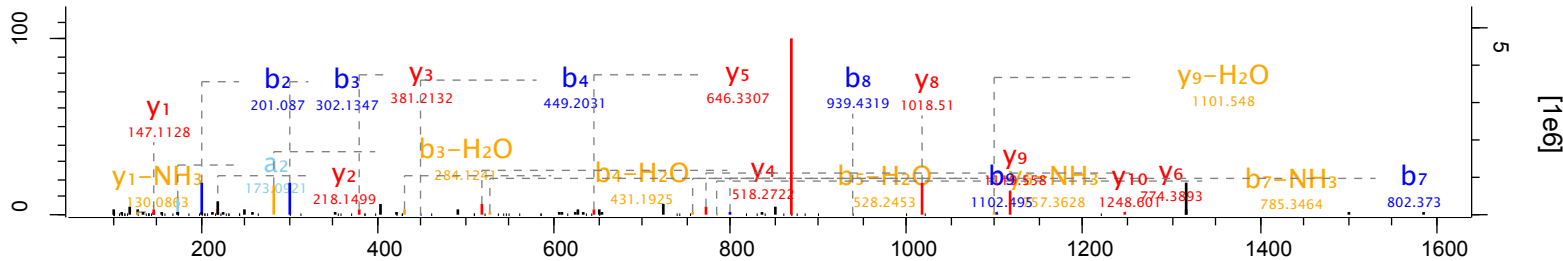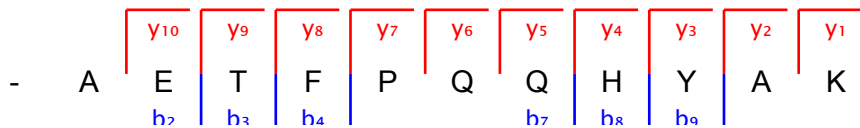

| Raw file                                   | Scan  | Method    | Score  | m/z    | Gene names |
|--------------------------------------------|-------|-----------|--------|--------|------------|
| 20121216_EXQ1_AtDe_50CM_LFQ_myotubes_OG3_9 | 17643 | FTMS; HCD | 104.22 | 440.55 | Sobp       |

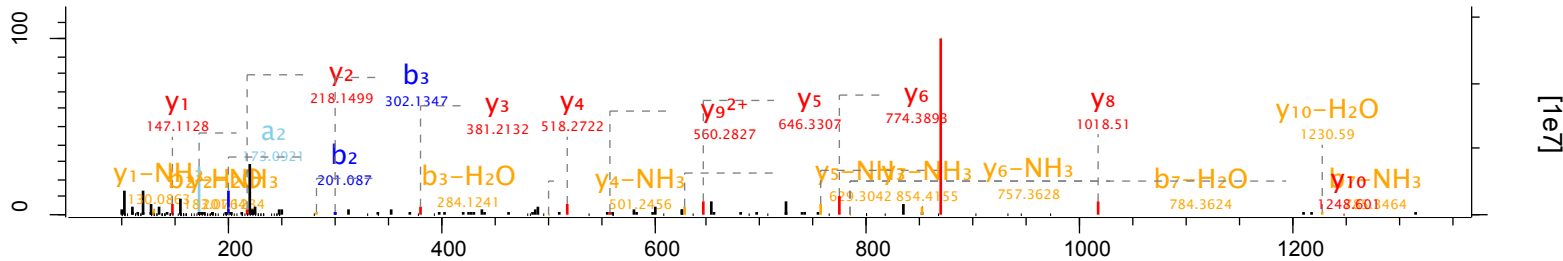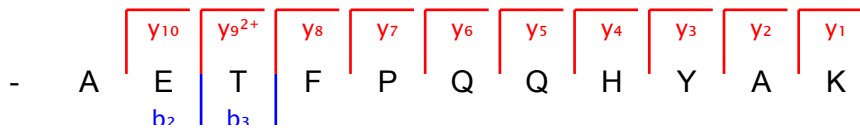

| Raw file                                   | Scan  | Method    | Score | m/z    | Gene names |
|--------------------------------------------|-------|-----------|-------|--------|------------|
| 20121216_EXQ1_AtDe_50CM_LFQ_myotubes_OG3_9 | 18441 | FTMS; HCD | 116.6 | 676.33 | Zfp235     |

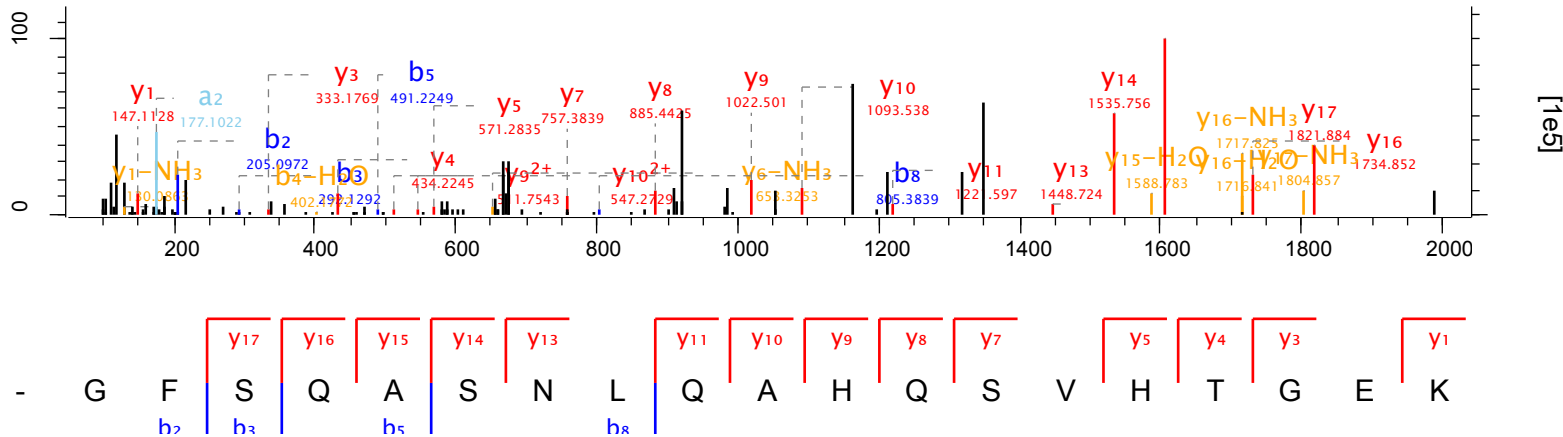

| Raw file                                   | Scan  | Method    | Score  | m/z    | Gene names |
|--------------------------------------------|-------|-----------|--------|--------|------------|
| 20121216_EXQ1_AtDe_50CM_LFQ_myotubes_OG3_9 | 18859 | FTMS; HCD | 146.96 | 671.84 | Sprtn      |

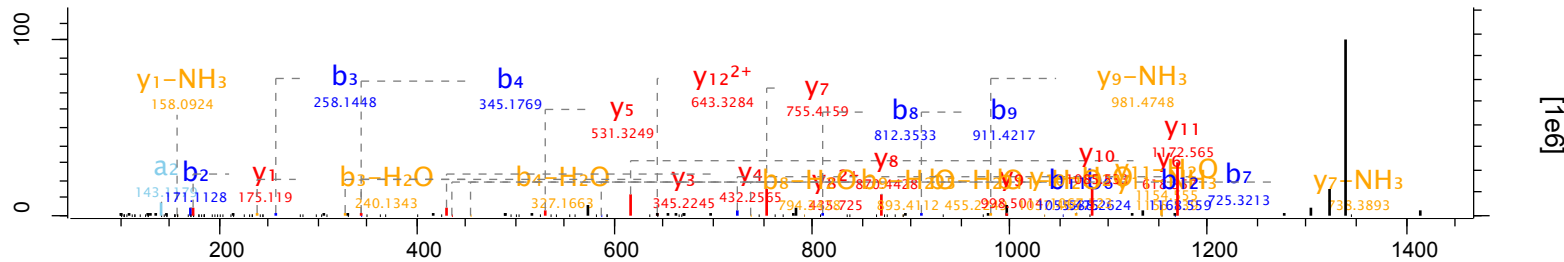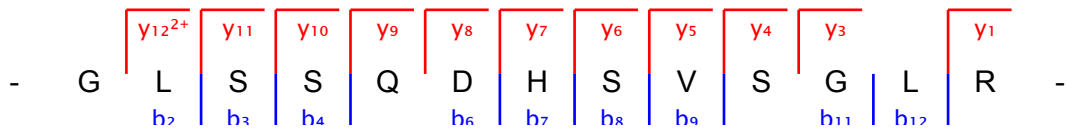

| Raw file                                   | Scan  | Method    | Score | m/z    | Gene names |
|--------------------------------------------|-------|-----------|-------|--------|------------|
| 20121216_EXQ1_AtDe_50CM_LFQ_myotubes_OG3_9 | 19130 | FTMS; HCD | 74.84 | 336.19 | Cebpa      |

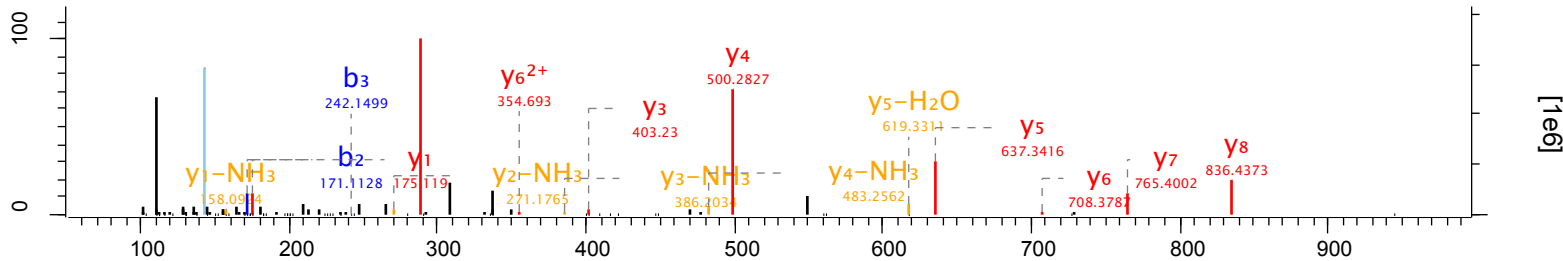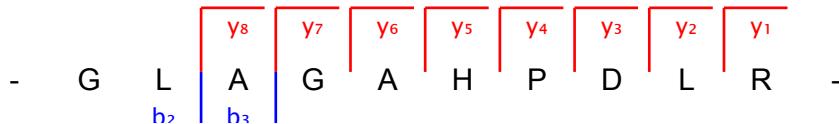

| Raw file                                   | Scan  | Method    | Score | m/z   | Gene names |
|--------------------------------------------|-------|-----------|-------|-------|------------|
| 20121216_EXQ1_AtDe_50CM_LFQ_myotubes_OG3_9 | 26793 | FTMS; HCD | 59.42 | 546.3 | Vgll3      |

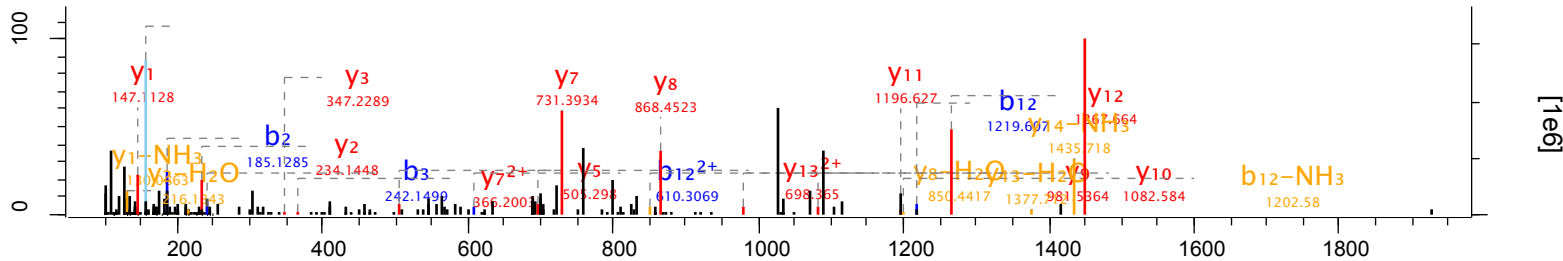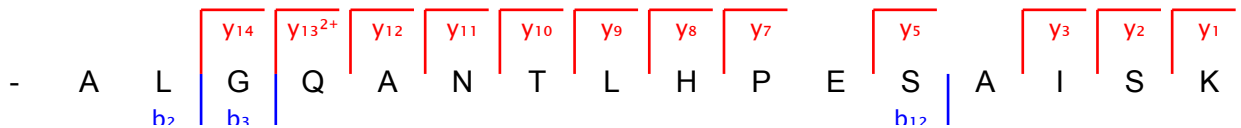

| Raw file                                   | Scan  | Method    | Score | m/z    | Gene names |
|--------------------------------------------|-------|-----------|-------|--------|------------|
| 20121216_EXQ1_AtDe_50CM_LFQ_myotubes_OG3_9 | 26935 | FTMS; HCD | 72.68 | 819.44 | Vgll3      |

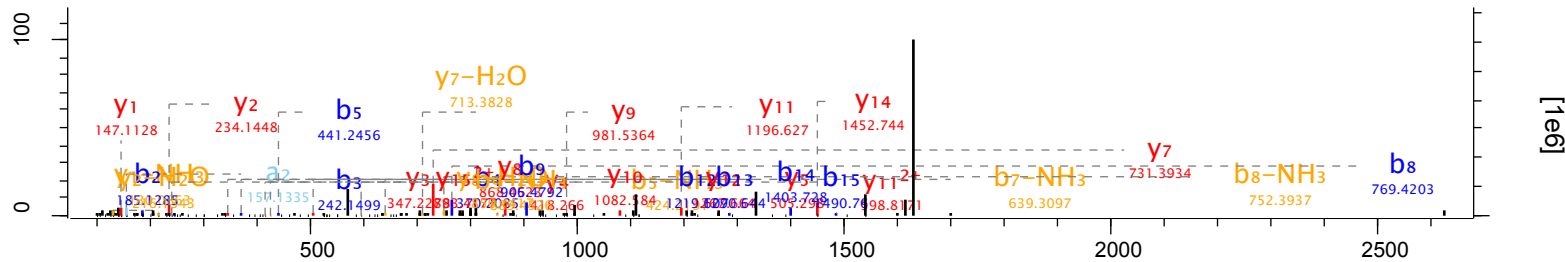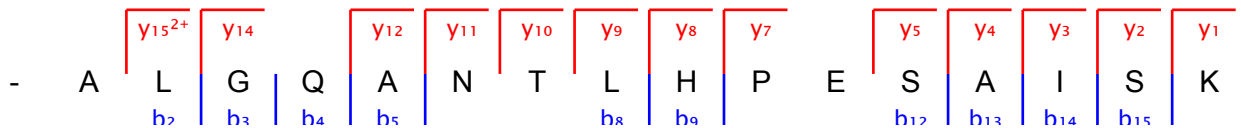

| Raw file                                   | Scan  | Method    | Score | m/z    | Gene names        |
|--------------------------------------------|-------|-----------|-------|--------|-------------------|
| 20121216_EXQ1_AtDe_50CM_LFQ_myotubes_OG3_9 | 29213 | FTMS; HCD | 72.99 | 588.77 | Zfp747;9130019022 |

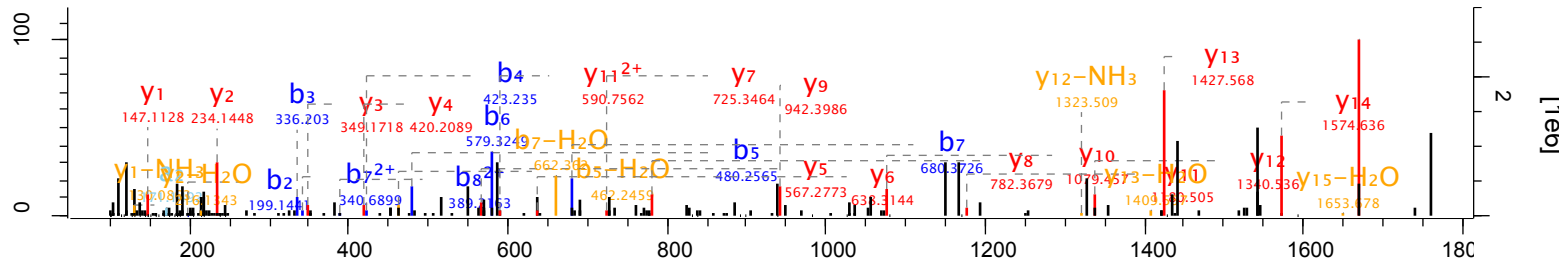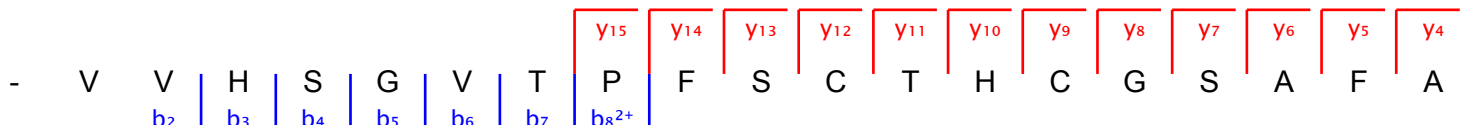



| Raw file                                   | Scan  | Method    | Score | m/z    | Gene names        |
|--------------------------------------------|-------|-----------|-------|--------|-------------------|
| 20121216_EXQ1_AtDe_50CM_LFQ_myotubes_OG3_9 | 29224 | FTMS; HCD | 83.36 | 784.69 | Zfp747;9130019022 |

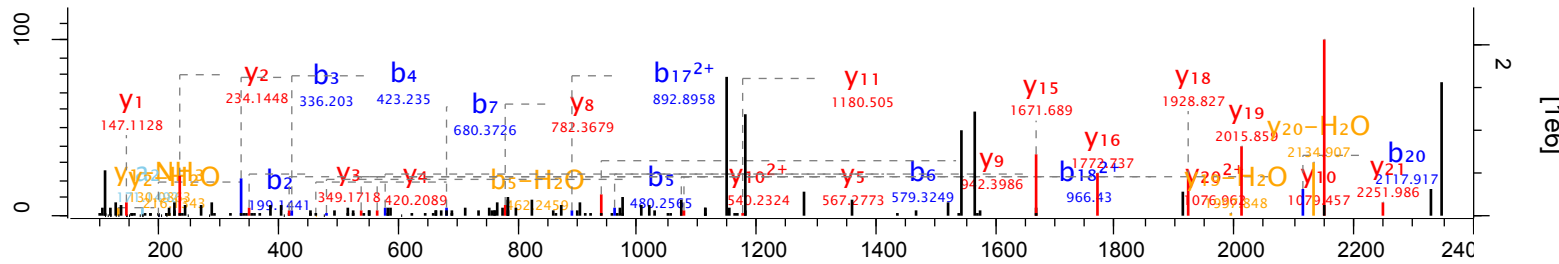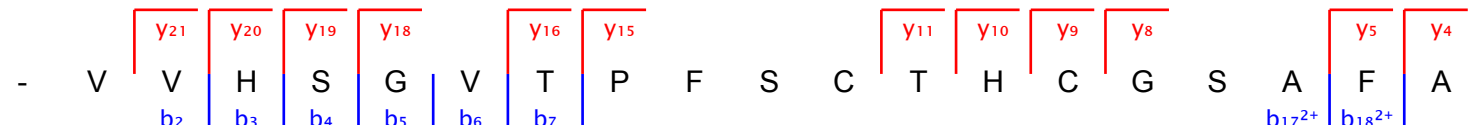

| Raw file                                   | Scan  | Method    | Score | m/z    | Gene names |
|--------------------------------------------|-------|-----------|-------|--------|------------|
| 20121216_EXQ1_AtDe_50CM_LFQ_myotubes_OG3_9 | 34079 | FTMS; HCD | 97.45 | 410.22 | Pex13      |

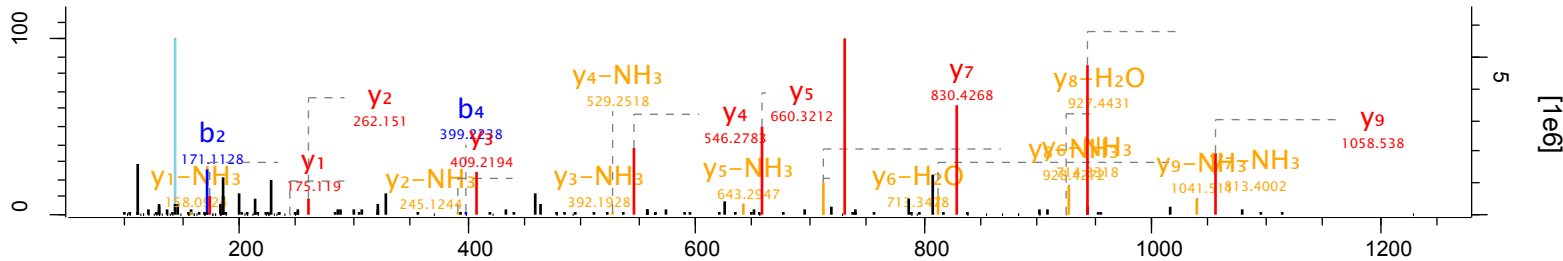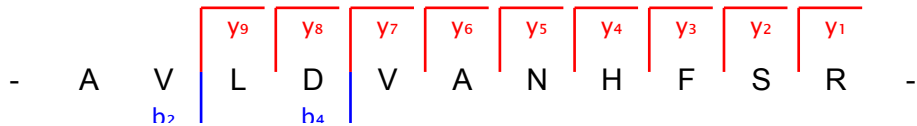

| Raw file                                   | Scan  | Method    | Score | m/z    | Gene names  |
|--------------------------------------------|-------|-----------|-------|--------|-------------|
| 20121216_EXQ1_AtDe_50CM_LFQ_myotubes_OG3_9 | 35595 | FTMS; HCD | 120.9 | 629.01 | 2700081015R |

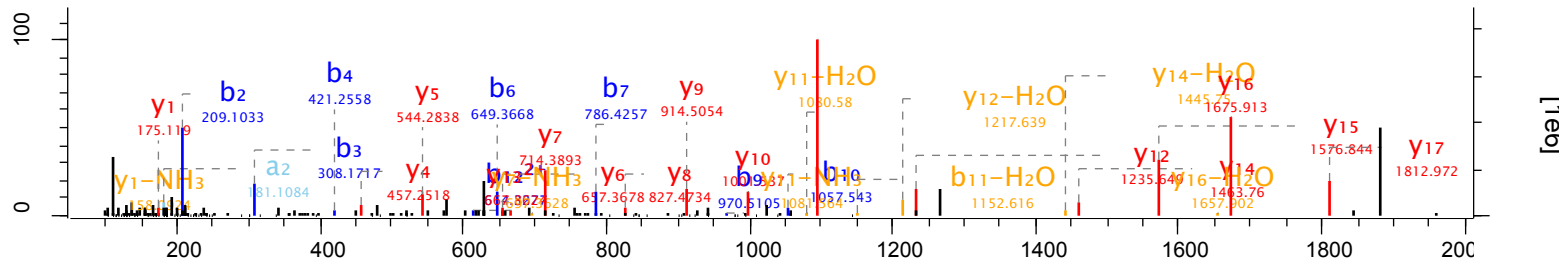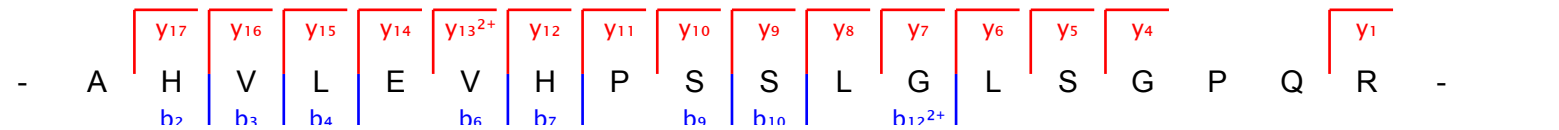

| Raw file                                   | Scan  | Method    | Score  | m/z    | Gene names |
|--------------------------------------------|-------|-----------|--------|--------|------------|
| 20121216_EXQ1_AtDe_50CM_LFQ_myotubes_OG3_9 | 36158 | FTMS; HCD | 110.97 | 647.69 | Rfng       |

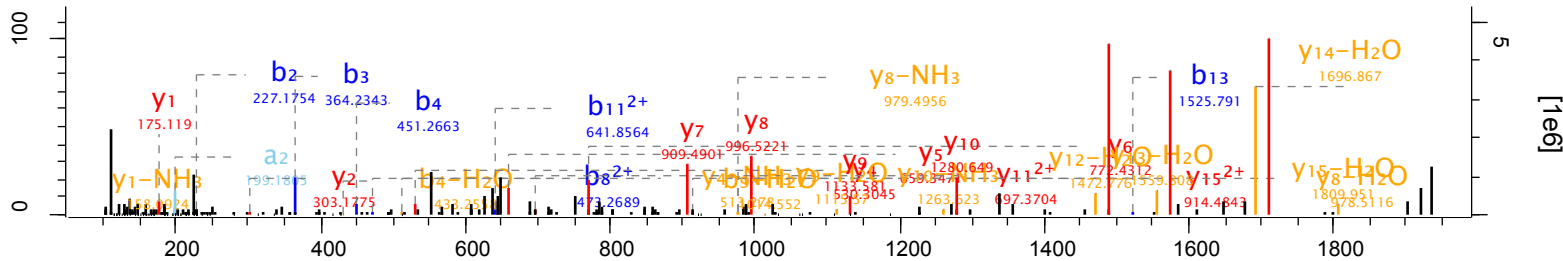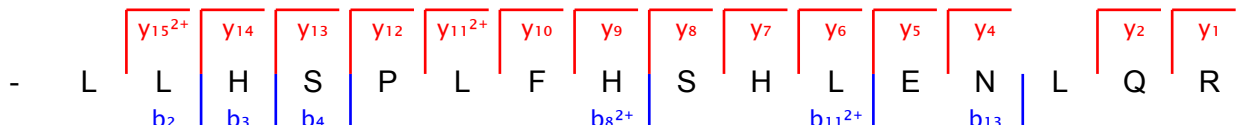

| Raw file                                   | Scan  | Method    | Score | m/z    | Gene names |
|--------------------------------------------|-------|-----------|-------|--------|------------|
| 20121216_EXQ1_AtDe_50CM_LFQ_myotubes_OG3_9 | 39913 | FTMS; HCD | 70.78 | 596.31 | Avil       |

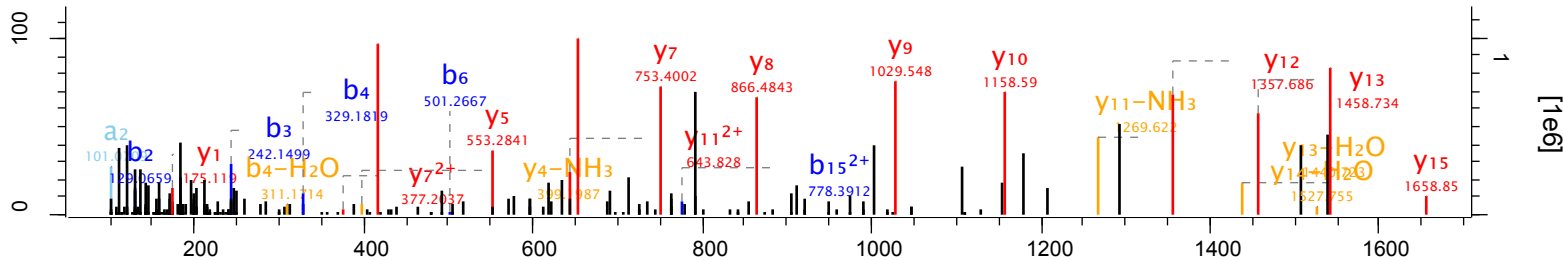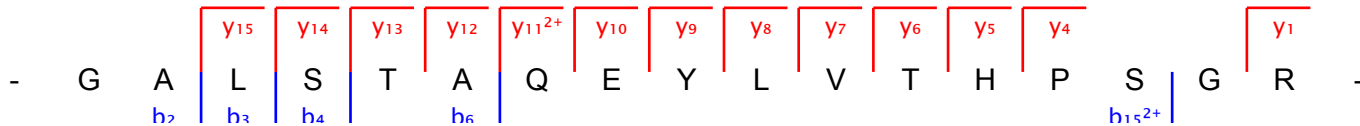

| Raw file                                   | Scan  | Method    | Score | m/z    | Gene names |
|--------------------------------------------|-------|-----------|-------|--------|------------|
| 20121216_EXQ1_AtDe_50CM_LFQ_myotubes_OG3_9 | 43449 | FTMS; HCD | 87.39 | 678.32 | Crim1      |

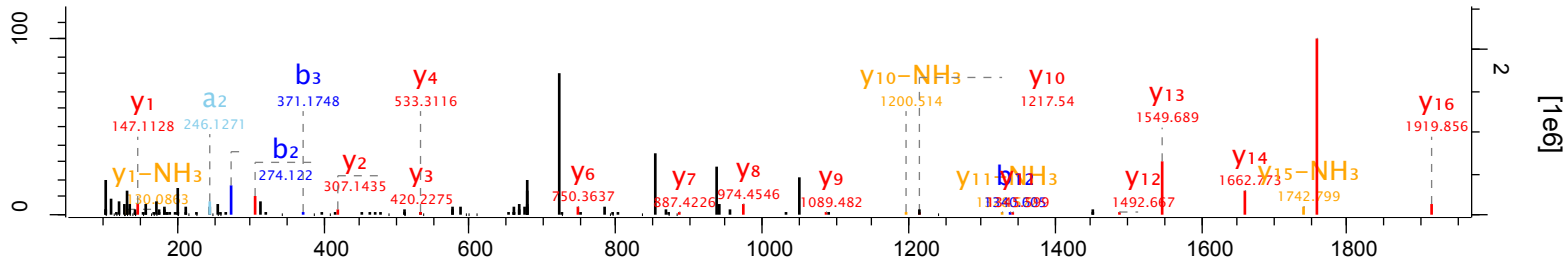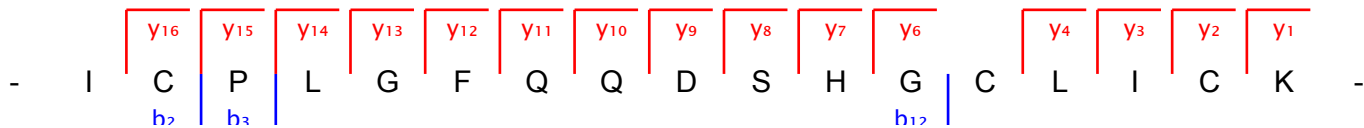

| Raw file                                   | Scan  | Method    | Score | m/z    | Gene names |
|--------------------------------------------|-------|-----------|-------|--------|------------|
| 20121216_EXQ1_AtDe_50CM_LFQ_myotubes_OG3_9 | 44945 | FTMS; HCD | 69.82 | 482.79 | Plch1      |

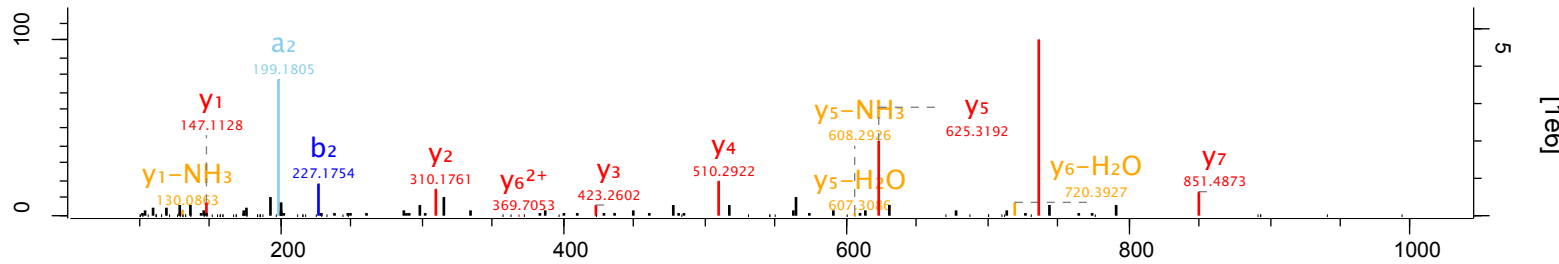

| Raw file                                   | Scan  | Method    | Score | m/z    | Gene names |
|--------------------------------------------|-------|-----------|-------|--------|------------|
| 20121216_EXQ1_AtDe_50CM_LFQ_myotubes_OG3_9 | 45606 | FTMS; HCD | 64.1  | 465.95 | Efcab14    |

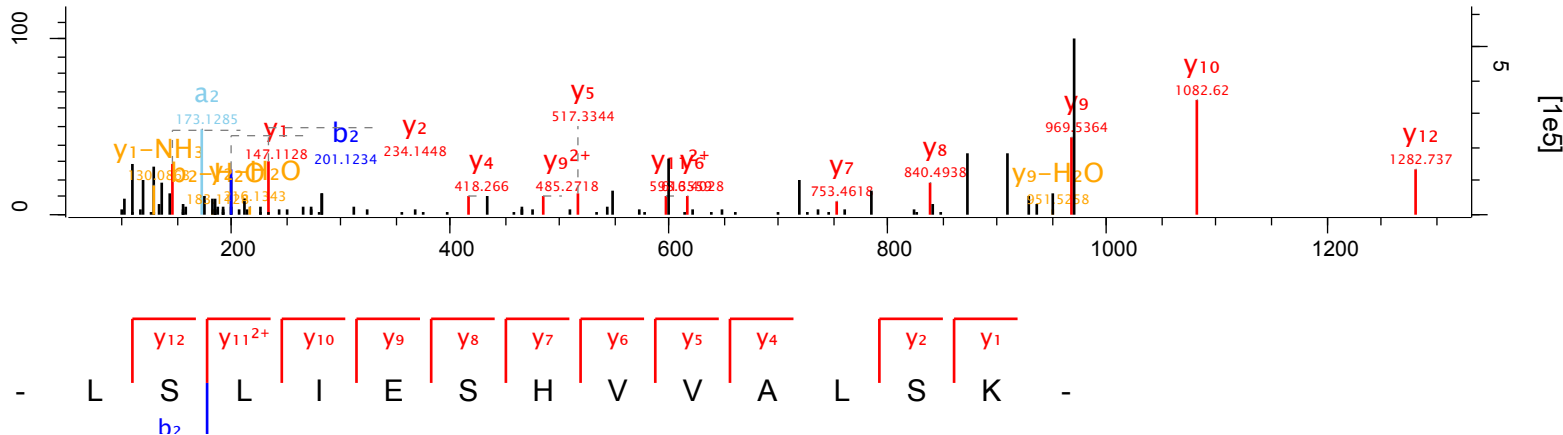



| Raw file                                   | Scan  | Method    | Score | m/z    | Gene names |
|--------------------------------------------|-------|-----------|-------|--------|------------|
| 20121216_EXQ1_AtDe_50CM_LFQ_myotubes_OG3_9 | 46332 | FTMS; HCD | 69.72 | 467.25 | Fam132a    |

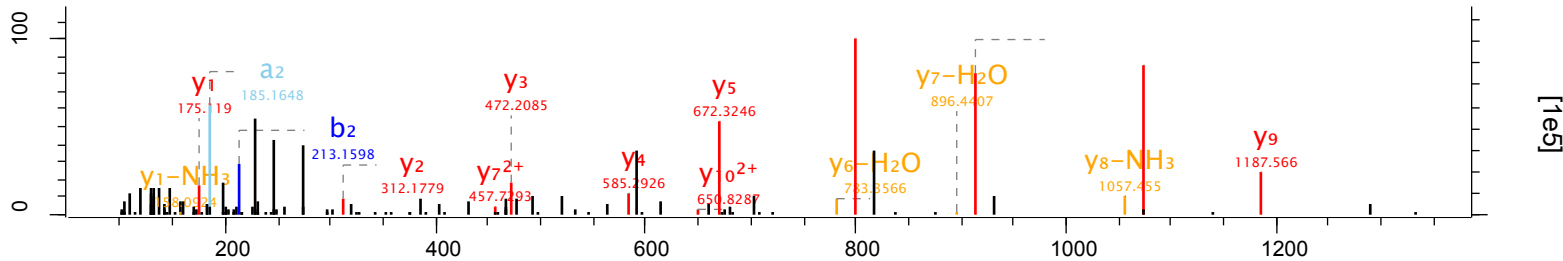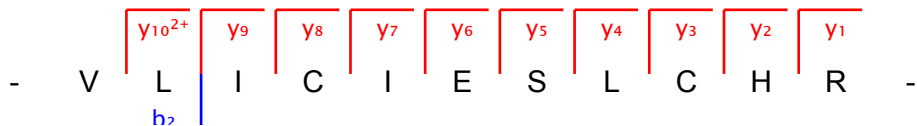

| Raw file                                   | Scan  | Method    | Score | m/z    | Gene names |
|--------------------------------------------|-------|-----------|-------|--------|------------|
| 20121216_EXQ1_AtDe_50CM_LFQ_myotubes_OG3_9 | 46667 | FTMS; HCD | 47.71 | 789.94 | Tyro3      |

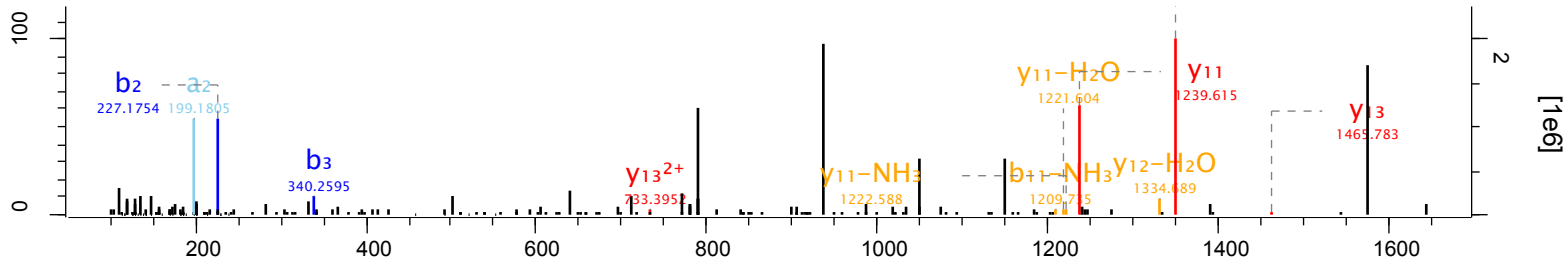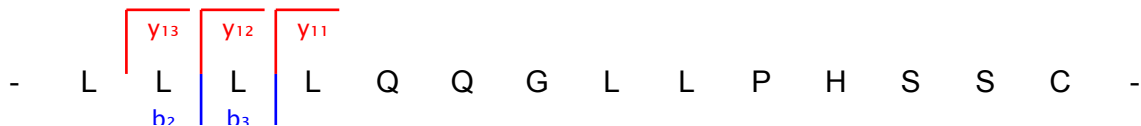

| Raw file                                   | Scan  | Method    | Score | m/z | Gene names |
|--------------------------------------------|-------|-----------|-------|-----|------------|
| 20121216_EXQ1_AtDe_50CM_LFQ_myotubes_OG3_9 | 50275 | FTMS; HCD | 44.58 | 881 | Krtcap2    |

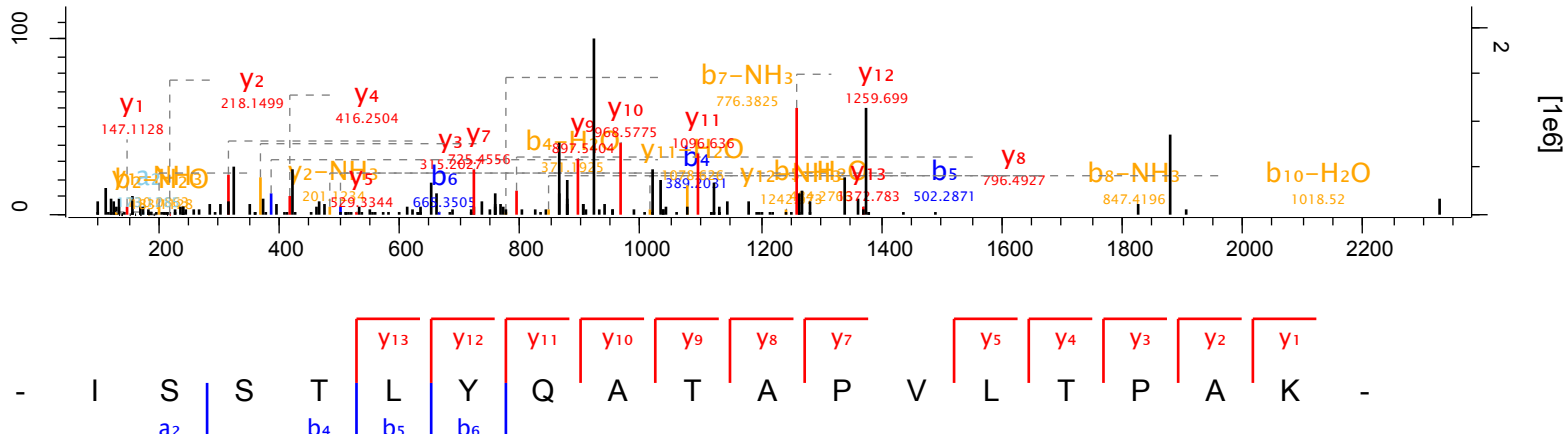

| Raw file                                   | Scan  | Method    | Score  | m/z    | Gene names |
|--------------------------------------------|-------|-----------|--------|--------|------------|
| 20121216_EXQ1_AtDe_50CM_LFQ_myotubes_OG3_9 | 52444 | FTMS; HCD | 105.28 | 620.68 | Zbtb22     |

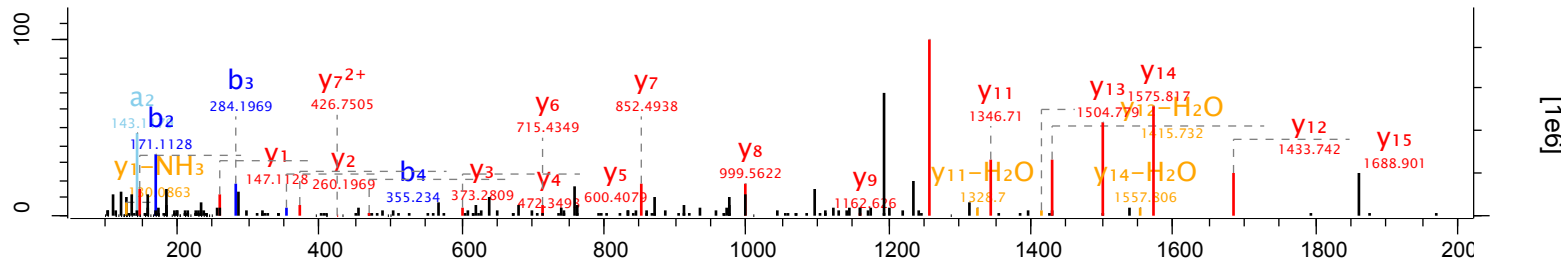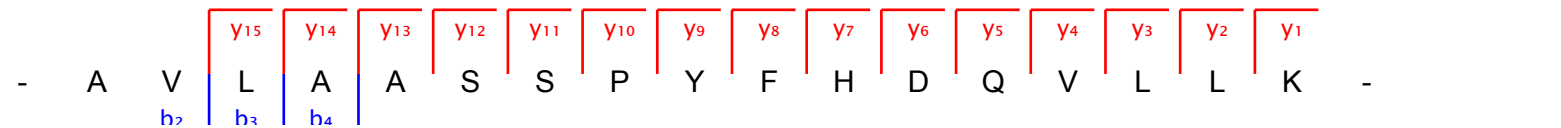

| Raw file                                   | Scan  | Method    | Score  | m/z    | Gene names |
|--------------------------------------------|-------|-----------|--------|--------|------------|
| 20121216_EXQ1_AtDe_50CM_LFQ_myotubes_OG3_9 | 52452 | FTMS; HCD | 124.68 | 930.01 | Zbtb22     |

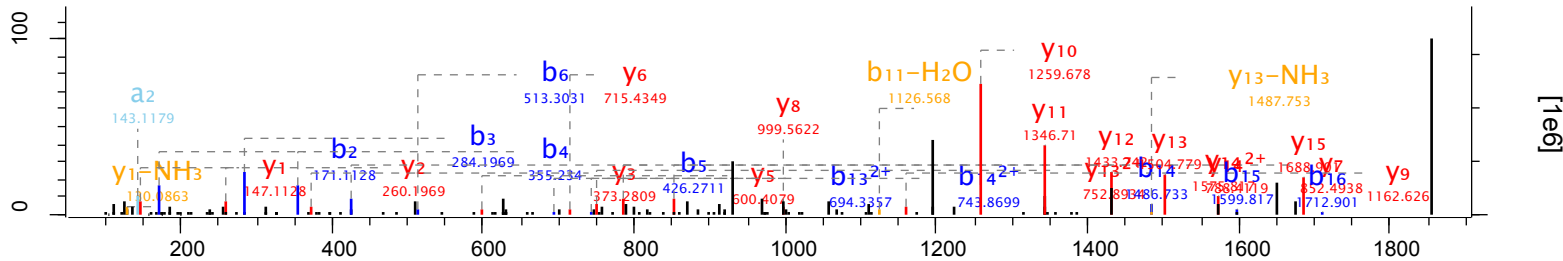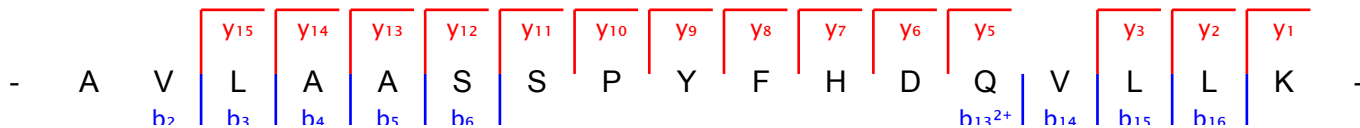

| Raw file                                   | Scan  | Method    | Score | m/z   | Gene names |
|--------------------------------------------|-------|-----------|-------|-------|------------|
| 20121216_EXQ1_AtDe_50CM_LFQ_myotubes_OG3_9 | 53769 | FTMS; HCD | 128.4 | 729.4 | Lrp12      |

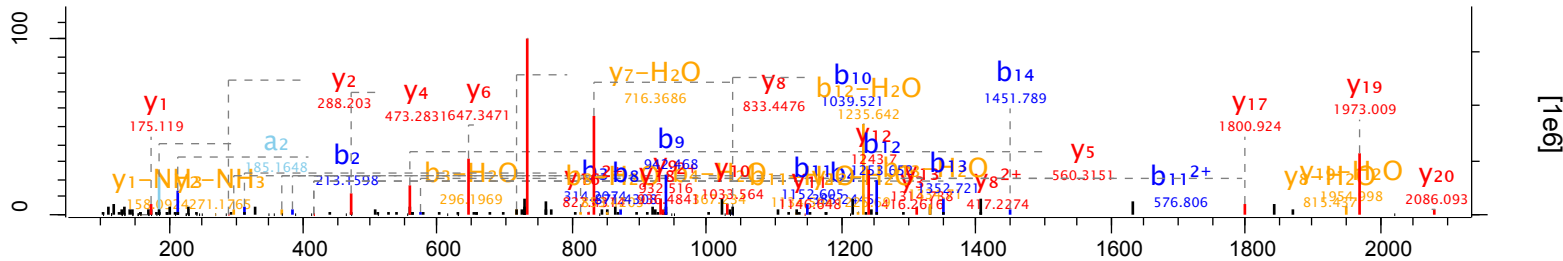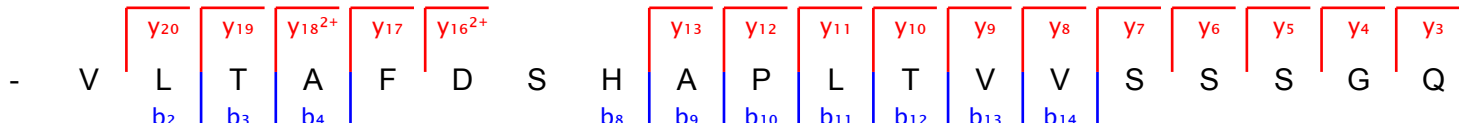

| Raw file                                   | Scan  | Method    | Score | m/z    | Gene names |
|--------------------------------------------|-------|-----------|-------|--------|------------|
| 20121216_EXQ1_AtDe_50CM_LFQ_myotubes_OG3_9 | 57609 | FTMS; HCD | 47.69 | 658.36 | Zfp874a    |

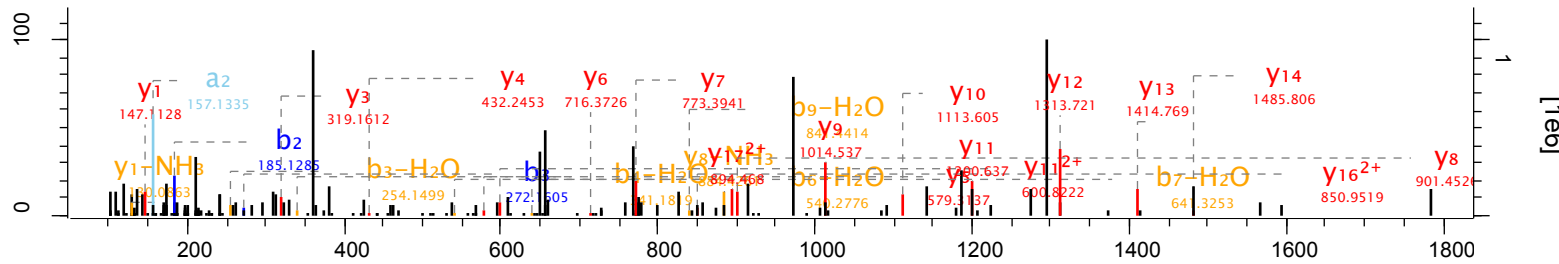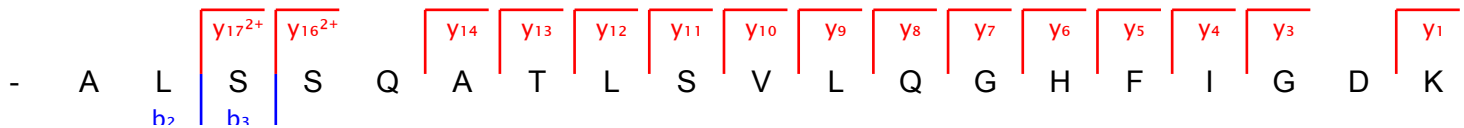

| Raw file                                   | Scan  | Method    | Score | m/z    | Gene names |
|--------------------------------------------|-------|-----------|-------|--------|------------|
| 20121216_EXQ1_AtDe_50CM_LFQ_myotubes_OG3_9 | 57698 | FTMS; HCD | 64.1  | 482.28 | Znrf1      |

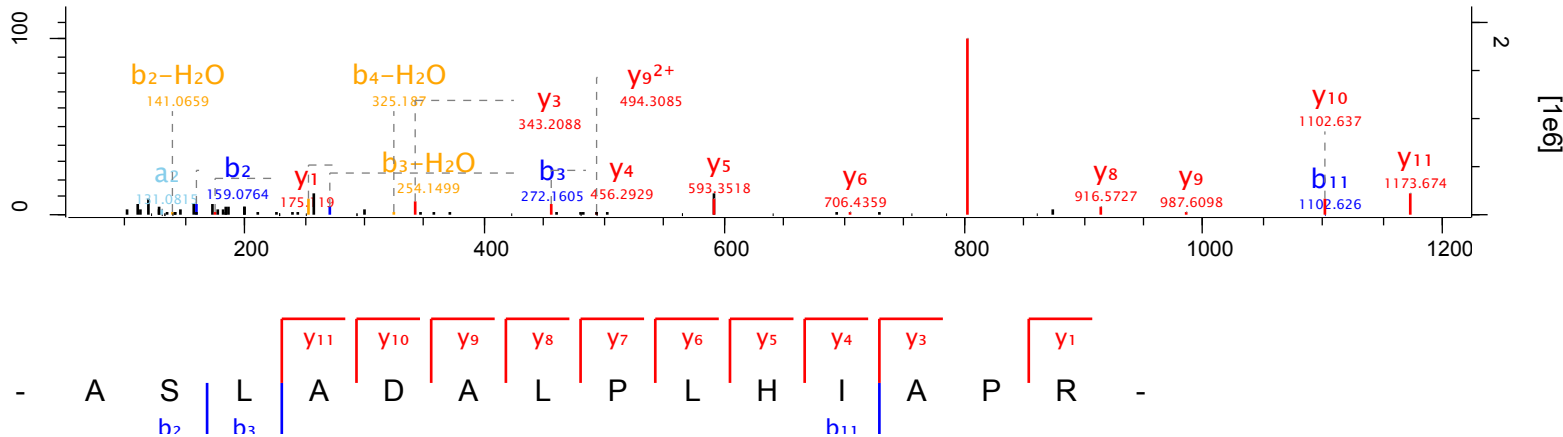



| Raw file                                   | Scan  | Method    | Score | m/z    | Gene names |
|--------------------------------------------|-------|-----------|-------|--------|------------|
| 20121216_EXQ1_AtDe_50CM_LFQ_myotubes_OG3_9 | 57732 | FTMS; HCD | 96.46 | 723.42 | Znrf1      |

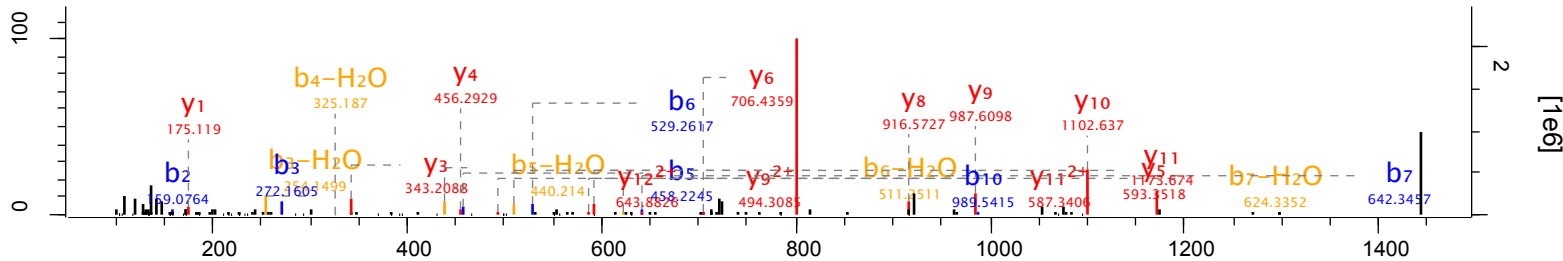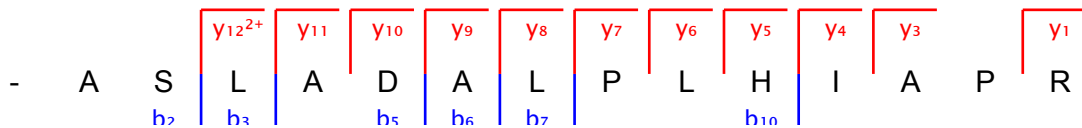

| Raw file                                   | Scan  | Method    | Score | m/z    | Gene names |
|--------------------------------------------|-------|-----------|-------|--------|------------|
| 20121216_EXQ1_AtDe_50CM_LFQ_myotubes_OG3_9 | 60452 | FTMS; HCD | 61.96 | 716.41 | Usp21      |

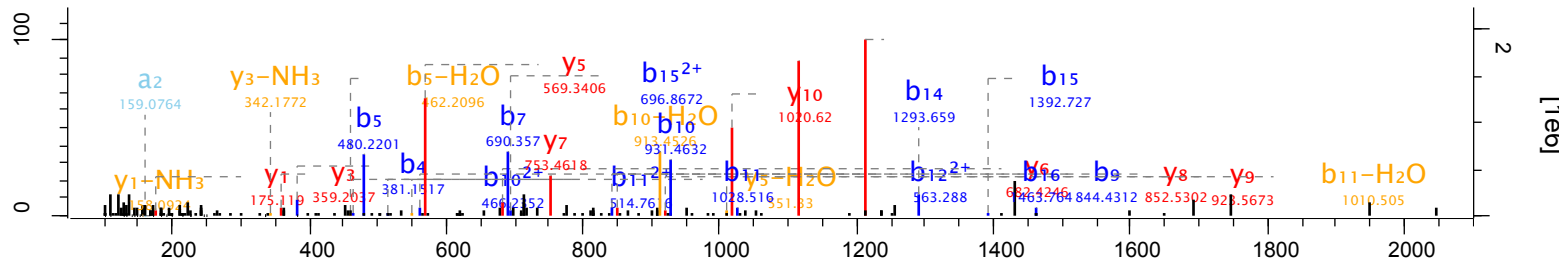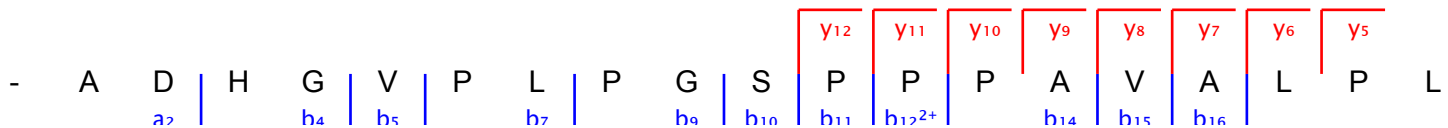

| Raw file                                   | Scan  | Method    | Score  | m/z    | Gene names |
|--------------------------------------------|-------|-----------|--------|--------|------------|
| 20121216_EXQ1_AtDe_50CM_LFQ_myotubes_OG3_9 | 61861 | FTMS; HCD | 110.97 | 813.96 | Plac8      |

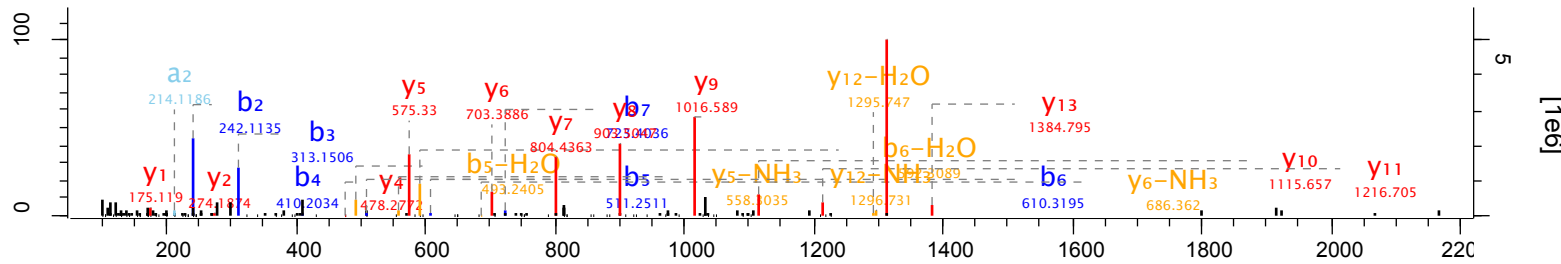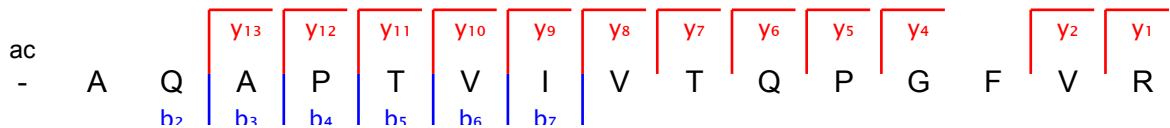

| Raw file                                   | Scan  | Method    | Score | m/z    | Gene names |
|--------------------------------------------|-------|-----------|-------|--------|------------|
| 20121216_EXQ1_AtDe_50CM_LFQ_myotubes_OG3_9 | 62783 | FTMS; HCD | 64.59 | 854.79 | Ubox5      |

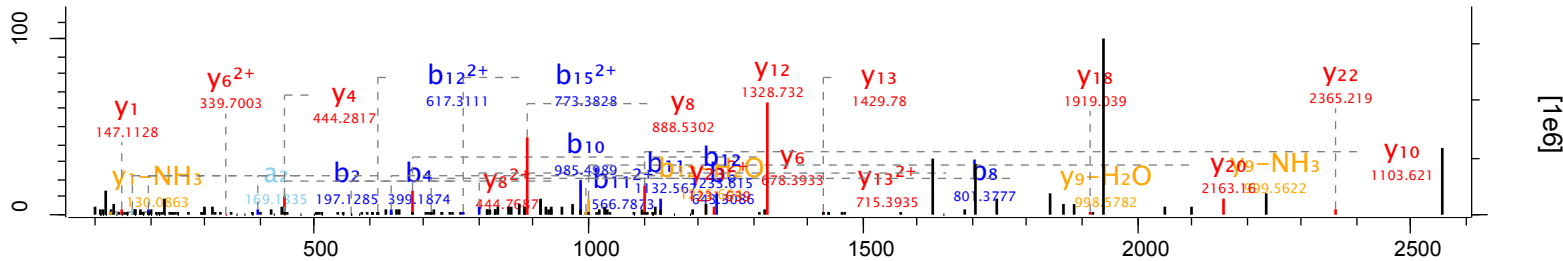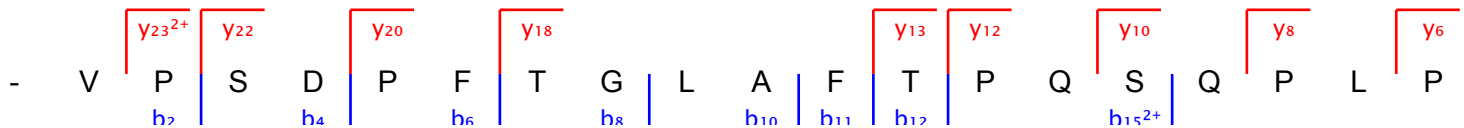

| Raw file                                   | Scan  | Method    | Score | m/z    | Gene names |
|--------------------------------------------|-------|-----------|-------|--------|------------|
| 20121216_EXQ1_AtDe_50CM_LFQ_myotubes_OG3_9 | 65670 | FTMS; HCD | 70.9  | 703.39 | Hivep1     |

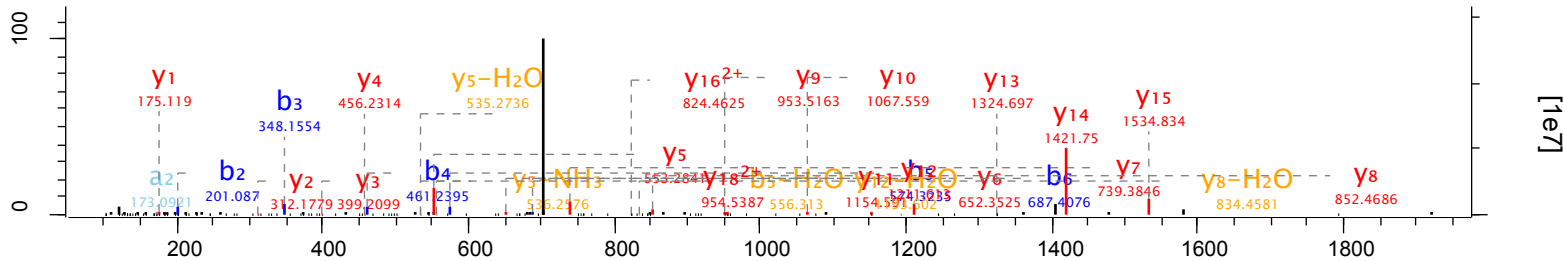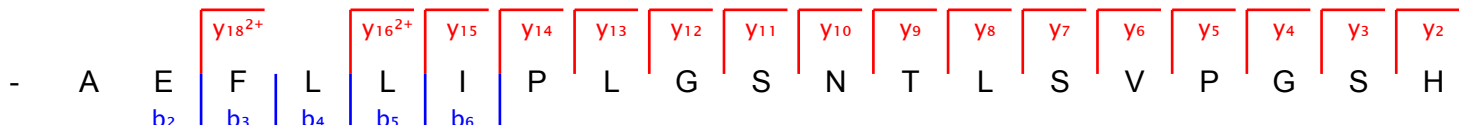

Supplement: supp_M114.044222_mcp.M114.044222-13.pdf [file supp_M114.044222_mcp.M114.044222-13.pdf]
